# Supplementary material for: Novel mechanistic insights into the role of Mer2 as the keystone of meiotic DNA break formation
Source: eLife journal article supplement (doi:10.7554/elife.72330), 2021-12-24
Supplement: data2 [file Cluster_results_10cluster_741_proteins_V1.xlsx]

## Sheet: Cluster_results_10cluster_741_proteins_V1
gene_name	kmeans.cluster.group	hclust.cluster.group
ABF1	6	1
ABF2	6	2
ACC1	1	1
ACF2	4	3
ACH1	9	4
ACO1	7	4
ACS1	1	5
ACS2	3	6
ACT1	1	1
ADE12	8	3
ADE13	1	1
ADE17	7	5
ADE2	7	5
ADE3	9	5
ADE4	7	5
ADE5,7	8	3
ADE6	1	1
ADH1	3	6
ADH2	1	1
ADH3	7	5
ADR1	10	2
ADY3	9	7
AGX1	1	1
AIM45	5	6
ALA1	6	1
ALD4	7	4
ALD6	8	3
AMD1	9	7
AMS1	1	1
APE2	7	4
APL2	1	1
APN1	6	1
ARB1	6	8
ARD1	1	1
ARE2	8	3
ARG1	6	8
ARL1	8	3
ARO4	7	5
ARO9	8	3
ARP4	7	2
ARP7	3	6
ARP8	7	5
ARX1	7	5
ASC1	7	5
ATG8	5	6
ATP1	7	5
ATP2	8	3
ATP3	3	6
ATP5	5	6
BAT2	8	3
BBC1	7	5
BDF1	6	1
BDH1	8	3
BDP1	10	2
BFR1	10	4
BGL2	1	3
BMH1	3	6
BRE1	1	1
BRF1	10	2
BRN1	1	1
BRX1	9	4
CAD1	10	2
CAM1	6	8
CAR1	5	6
CAT2	1	3
CBF1	6	8
CBF5	10	4
CBR1	3	8
CCT3	8	3
CCT4	1	1
CCT8	7	5
CDC10	7	2
CDC12	1	1
CDC19	8	3
CDC24	7	5
CDC3	6	1
CDC60	10	2
CDS1	1	1
CFT2	8	8
CHC1	1	1
CHD1	6	1
CIC1	9	4
CIT1	9	4
CKA1	9	4
CKA2	8	3
CLU1	2	9
CMR1	2	10
CNM67	1	1
COP1	8	3
COR1	9	7
COX2	8	3
CPA2	3	6
CPR1	4	3
CPS1	8	3
CRC1	8	3
CRH1	5	6
CRM1	8	3
CRP1	7	5
CRZ1	10	2
CSE4	6	8
CST6	8	3
CTA1	2	9
CUE5	8	3
CWP1	9	7
CYC1	5	6
CYT1	1	7
DBP2	1	1
DBP3	8	1
DBP5	10	2
DED1	10	4
DED81	7	5
DEF1	8	8
DHH1	7	5
DIS3	5	6
DLD1	1	3
DMA2	1	1
DMC1	8	3
DNM1	1	1
DOT5	1	1
DPM1	7	4
DPS1	7	5
DST1	9	4
DUG1	8	8
EAF3	1	1
EBP2	9	4
EDE1	6	8
EFT1	1	1
EGD1	2	10
EHT1	6	8
EIS1	8	3
ENO1	1	1
ENO2	8	3
EPL1	1	1
ERB1	9	4
ERG10	7	5
ERG13	3	6
ERG20	6	1
ERG27	8	3
ERG6	8	3
ERV29	10	2
ETR1	1	1
FAA1	6	1
FAA2	1	1
FAA4	8	3
FAS1	5	6
FBP1	1	5
FHL1	6	1
FOX2	2	9
FPR3	9	4
FRA1	6	1
FRS1	7	2
FRS2	6	8
FUM1	1	1
FUN12	7	2
GAR1	1	1
GAS1	8	3
GCD11	7	4
GCN2	1	5
GCN5	3	6
GCV1	8	3
GCV2	1	1
GDB1	3	6
GDH1	3	6
GDH2	1	1
GDI1	6	8
GET4	9	4
GGA1	6	8
GGA2	8	3
GLC3	8	3
GLK1	1	1
GLN1	8	3
GLO3	7	5
GLR1	8	8
GLT1	10	2
GND1	3	6
GPD1	8	8
GPH1	8	3
GPM1	4	3
GPT2	1	1
GRS1	6	1
GSP2	2	10
GSY1	3	6
GTS1	6	1
GTT3	6	8
GUS1	7	5
GUT2	8	3
HAS1	1	5
HCR1	8	3
HEF3	8	8
HFD1	7	4
HHF1	6	2
HHO1	2	10
HHT1	10	2
HIR1	6	8
HIR2	10	2
HIR3	6	8
HIS3	2	10
HMO1	10	2
HOM2	3	6
HOM6	7	4
HOP1	10	4
HOS3	6	8
HPC2	6	8
HRK1	1	7
HRR25	7	5
HSC82	1	1
HSP104	6	8
HSP150	4	3
HSP60	3	6
HSP82	9	4
HSV2	6	8
HTA1|HTA2	2	10
HTB1	2	10
HTB2	2	10
HTS1	10	4
HttQx_EGFP	5	6
HTZ1	6	8
HYP2	3	6
ICL1	1	1
IDH1	3	6
IDP2	7	5
IDP3	8	3
IES1	3	6
IES2	6	1
IFM1	8	3
ILV2	5	6
IMD4	1	1
IMG1	7	5
IMG2	4	3
IMH1	1	1
INO1	1	1
INO80	1	5
IOC2	10	2
IOC3	10	2
IPI3	1	1
IPP1	1	3
IRR1	9	4
IST1	3	6
IST2	1	1
ISW1	10	2
ISW2	1	1
JHD1	6	1
JIP5	1	1
KAP95	9	4
KAR2	6	8
KGD1	1	1
KGD2	9	5
KIN1	1	1
KIN2	9	7
KNS1	1	1
KRS1	3	6
LAP3	1	1
LAT1	1	1
LEU4	7	5
LOC1	10	2
LPD1	7	5
LPX1	7	5
LSB3	2	2
LSC1	6	8
LSC2	1	1
LSM12	6	8
LSP1	8	3
LYS1	3	8
MAK21	1	1
MBF1	5	6
MCK1	1	5
MCM3	6	8
MCM4	1	1
MDG1	7	5
MDH2	7	4
MDH3	9	4
MDJ1	8	3
MDM38	8	3
MET17	7	5
MET6	1	1
MGA2	6	8
MGM101	10	2
MIR1	9	4
MIS1	7	5
MKT1	6	8
MLH1	7	1
MLS1	1	1
MND1	7	4
MOT1	7	5
MPH1	6	8
MRM1	1	5
MRP20	9	7
MRP7	9	4
MRPL10	7	4
MRPL11	7	5
MRPL16	9	4
MRPL17	9	5
MRPL22	9	4
MRPL24	1	5
MRPL25	3	6
MRPL3	8	3
MRPL32	7	5
MRPL35	9	4
MRPL36	8	3
MRPL40	3	6
MRPL9	9	4
MRPS17	7	5
MRPS28	10	2
MRPS35	1	1
MRPS5	2	9
MRPS9	9	4
MRT4	7	5
MSD1	1	1
MSH1	7	2
MSH2	5	6
MSH6	10	2
MSS116	10	4
MST1	7	2
MSY1	7	4
MVD1	8	3
MYO2	8	3
MYO3	7	5
NAM7	1	1
NAM9	2	9
NAT1	7	5
NAT10	1	1
NCE102	5	6
NDI1	9	5
NGG1	1	1
NHP2	7	2
NHP6A	10	2
NHP6B	2	2
NIC96	8	3
NIP1	1	1
NOC2	1	1
NOG1	7	5
NOP1	1	1
NOP12	1	1
NOP13	1	1
NOP16	1	1
NOP2	7	4
NOP56	7	5
NOP58	1	1
NOP7	9	4
NPL6	1	1
NSA1	9	4
NSR1	2	9
NTH1	3	8
NTO1	10	2
NUP145	8	3
NUS1	7	5
OAF1	8	8
OLA1	6	8
OLE1	8	8
OSM1	1	1
P1707_RE|RTN1	3	6
PAB1	3	8
PAT1	10	4
PBP1	8	8
PCK1	1	1
PCS60	1	3
PCT1	10	2
PDA1	7	5
PDB1	3	6
PDC1	7	5
PDE2	7	2
PDH1	7	5
PDI1	7	5
PDR16	3	6
PDS5	1	3
PEP4	1	1
PET10	3	6
PET127	8	3
PET9	7	5
PFK1	1	5
PFK2	1	5
PGI1	1	1
PGK1	3	6
PGM2	1	1
PHO2	1	1
PIL1	9	4
PIP2	7	2
PMA1	7	5
PMT1	8	1
PMT2	3	6
POB3	10	2
POL30	9	5
POM33	1	1
POR1	1	3
POX1	9	4
PRB1	8	3
PRE3	8	3
PRE7	8	3
PRO3	8	3
PRP19	1	1
PRP43	9	4
PRS1	8	3
PRS3	5	6
PRT1	7	5
PSA1	1	5
PSH1	7	4
PUF3	10	4
PUF6	7	5
PUP2	1	1
PWP1	8	3
PYC1	1	1
QCR2	9	5
RAD16	6	8
RAD51	3	6
RAD52	7	5
RAP1	6	8
RAS2	5	6
RBG1	3	3
REB1	2	2
REC107	10	2
REC8	9	4
RED1	2	9
REP1	7	5
REP2	6	8
RET2	8	3
RFA1	7	2
RFC1	6	8
RFC2	7	5
RFC3	1	1
RGI1	8	3
RGI2	2	10
RIM1	10	2
RIM4	9	4
RIO2	1	3
RLI1	7	1
RLP7	3	6
RML2	2	9
RNP1	2	10
RNR1	1	1
RNR4	8	3
RPA135	7	5
RPA190	7	1
RPA49	1	1
RPB11	6	8
RPB2	10	2
RPB3	7	2
RPB4	3	6
RPB5	7	2
RPB8	10	2
RPC10	2	10
RPC82	10	2
RPG1	1	1
RPH1	10	2
RPL10	8	3
RPL11A|RPL11B	2	10
RPL12A|RPL12B	4	3
RPL13B|RPL13A	9	4
RPL14A|RPL14B	2	9
RPL15A	2	10
RPL16A	2	9
RPL16B	9	4
RPL18A|RPL18B	2	9
RPL19A|RPL19B	2	10
RPL1A|RPL1B	2	9
RPL20A|RPL20B	9	5
RPL21A|RPL21B	9	4
RPL22A	8	8
RPL24A	1	5
RPL24B	8	3
RPL25	9	5
RPL27A|RPL27B	9	4
RPL28	9	4
RPL29	2	9
RPL2A|RPL2B	2	9
RPL3	7	5
RPL30	2	9
RPL32	2	9
RPL34B|RPL34A	2	9
RPL35A|RPL35B	7	5
RPL36B	2	9
RPL37A	9	4
RPL42A|RPL42B	2	9
RPL43A|RPL43B	9	4
RPL4A	9	4
RPL5	8	3
RPL6A	9	4
RPL6B	9	7
RPL7A	2	9
RPL8A	9	4
RPL9B	7	5
RPN1	1	1
RPN2	1	1
RPN3	1	1
RPN6	3	3
RPO21	10	2
RPO31	6	8
RPP0	9	9
RPS0A	5	6
RPS11A|RPS11B	9	4
RPS12	3	6
RPS13	9	7
RPS14A|RPS14B	8	3
RPS15	9	4
RPS16A|RPS16B	7	5
RPS17A|RPS17B	9	5
RPS18A|RPS18B	2	9
RPS19A|RPS19B	5	6
RPS1A	2	10
RPS1B	1	5
RPS2	2	10
RPS20	7	5
RPS23A|RPS23B	2	9
RPS24A|RPS24B	2	10
RPS25B|RPS25A	9	4
RPS27A|RPS27B	8	3
RPS28B|RPS28A	3	6
RPS29A	3	6
RPS3	7	5
RPS30A|RPS30B	7	2
RPS31	7	5
RPS4A|RPS4B	9	4
RPS5	3	3
RPS6A|RPS6B	7	5
RPS7A	2	10
RPS7B	1	1
RPS8A|RPS8B	2	10
RPT1	3	6
RPT2	8	3
RPT3	1	1
RPT4	1	1
RPT6	1	1
RQC2	1	3
RRF1	9	7
RRN5	1	1
RRP14	1	1
RRP5	8	3
RSA4	7	5
RSC2	7	5
RSC8	7	5
RSC9	7	5
RSF1	10	2
RSM18	1	3
RSM23	9	4
RSM24	2	9
RSP5	7	1
RSR1	10	4
RTG2	8	8
RTS1	7	4
RTS2	6	1
RTT106	2	10
RVB1	1	1
RVB2	7	5
RVS161	1	1
SAC6	1	1
SAH1	7	1
SAM1	1	1
SAM2	5	6
SAS3	10	2
SBP1	3	6
SCC2	1	1
SCL1	8	3
SCP160	6	8
SCS2	1	1
SCY1	1	1
SDH1	8	3
SDH2	1	1
SDS24	3	6
SEC18	8	3
SEC23	6	8
SEC24	7	5
SEC26	8	3
SEC27	8	3
SEC4	6	8
SEC53	3	6
SEC61	7	5
SEC63	7	5
SEC7	8	3
SEC8	8	8
SEG1	1	1
SES1	7	2
SEY1	3	6
SGV1	3	6
SHE10	6	8
SHM1	10	4
SHM2	7	5
SHS1	1	1
SIS1	5	6
SKO1	2	10
SLA1	1	1
SLI15	8	3
SLM1	9	4
SMC1	7	4
SMC2	7	1
SMC3	10	4
SMC4	8	1
SMC5	3	6
SMC6	1	1
SMY2	1	1
SNF1	4	3
SOF1	3	6
SPB4	1	5
SPF1	6	8
SPO14	4	3
SPO22	8	3
SPP1	10	2
SPP41	7	1
SPS19	7	5
SPT15	7	2
SPT16	6	1
SPT5	7	2
SPT6	9	5
SPT7	7	5
SRL2	8	3
SRM1	10	2
SRO9	4	7
SRP1	10	4
SRP40	10	4
SRP54	3	3
SRP72	10	4
SSA1	5	6
SSA3	3	6
SSB1|SSB2	7	5
SSC1	3	8
SSD1	7	4
SSE1	1	1
SSZ1	7	5
STE24	7	5
STH1	8	3
STM1	2	9
SUB1	7	2
SUB2	3	6
SUC2	7	4
SUI2	10	2
SUI3	2	10
SUP35	10	2
SUP45	6	8
SWC3	10	2
SWC4	10	2
SWR1	10	2
SYP1	3	3
TAF1	8	3
TAF14	6	1
TAF5	1	1
TAF6	1	1
TAL1	1	1
TCP1	1	1
TDH1	4	3
TED1	1	1
TEF1	1	1
TEF4	10	4
TES1	1	5
TFC1	10	4
TFC3	1	1
TFC4	7	2
TFC6	2	10
TFC8	7	2
TGS1	8	3
THO1	3	3
THS1	2	10
TIF1	8	8
TIF34	1	1
TIF35	1	1
TIF4631	7	2
TIF5	1	1
TIM44	5	6
TKL1	9	5
TMA19	1	1
TMA22	9	4
TMA64	6	8
TMA7	1	1
TOP1	6	8
TOP2	7	5
TOR2	9	7
TPI1	5	6
TPS1	8	3
TPS2	3	6
TRA1	10	4
TRI1	10	2
TRM1	8	3
TRP3	8	3
TSA1	3	6
TSL1	1	1
TUB1|TUB3	1	3
TUB2	8	3
TUF1	5	6
TYS1	7	5
UBA1	1	1
UBP3	10	4
UBP6	7	1
UBP7	8	3
UGP1	7	5
ULS1	6	8
UME6	7	2
URA2	7	5
UTP23	6	8
UTP5	3	8
VAC8	6	8
VAS1	8	8
VID27	3	6
VMA1	8	3
VMA13	8	3
VMA2	7	5
VPS1	1	1
VPS17	8	3
VPS33	1	1
VPS5	1	1
VPS72	6	8
VTC4	1	1
WRS1	10	2
WTM1	1	5
XDJ1	1	5
XRN1	1	1
YAF9	7	5
YAT1	10	4
YAT2	8	3
YBT1	3	6
YCG1	6	1
YCS4	7	5
YDR115W	8	3
YDR341C	1	1
YEF3	7	5
YEL020C	7	5
YER079W	8	3
YFR006W	8	3
YGL081W	8	3
YGL108C	1	1
YGR130C	9	4
YGR169C-A	9	4
YGR266W	1	3
YHM2	9	4
YHR020W	3	6
YHR097C	9	4
YJR005C-A	1	5
YLR278C	8	1
YLR455W	10	2
YMR027W	8	3
YNG1	10	2
YNL040W	3	8
YNL115C	3	6
YNL181W	1	1
YNL247W	1	1
YNR021W	7	1
YPK2	9	4
YPT1	3	6
YPT7	3	6
YRA1	2	10
YTA7	10	2
YTM1	9	4
ZIP1	9	4
ZTA1	6	1
ZUO1	7	2
