# Supplementary material for: Novel mechanistic insights into the role of Mer2 as the keystone of meiotic DNA break formation
Source: eLife journal article supplement (doi:10.7554/elife.72330), 2021-12-24
Supplement: data2 [file Clustering_data_741_proteins_V1.xlsx]

## Sheet: Clustering_data_741_proteins_V1
gene_name	Control	MUT	WT
ABF1	1	3.94492	5.59203
ABF2	1	3.82418	8.03472
ACC1	1	4.71719	5.88277
ACF2	1	3.69504	1.4448
ACH1	1	9.85709	8.49154
ACO1	1	8.24739	8.5164
ACS1	1	6.32437	4.86245
ACS2	1	3.08247	2.86618
ACT1	1	5.42963	5.27409
ADE12	1	3.67266	2.95581
ADE13	1	4.64377	4.89236
ADE17	1	6.5813	6.02261
ADE2	1	7.17436	6.20551
ADE3	1	8.53764	4.75889
ADE4	1	7.28003	5.68111
ADE5,7	1	3.76044	3.09752
ADE6	1	5.51382	4.94151
ADH1	1	2.70767	2.33119
ADH2	1	5.84093	5.31264
ADH3	1	7.09571	6.89941
ADR1	1	6.63529	18.7188
ADY3	1	9.41334	3.89413
AGX1	1	5.06127	4.60696
AIM45	1	2.03427	2.20856
ALA1	1	4.16	5.11153
ALD4	1	8.23488	6.93775
ALD6	1	5.34707	3.30243
AMD1	1	9.83466	4.2068
AMS1	1	4.38575	4.64925
APE2	1	8.96769	8.48484
APL2	1	5.40166	6.18046
APN1	1	4.12246	6.2591
ARB1	1	2.99187	6.33307
ARD1	1	4.23344	4.47393
ARE2	1	4.0445	3.99789
ARG1	1	2.64009	4.44964
ARL1	1	4.36169	3.68368
ARO4	1	6.36951	6.61279
ARO9	1	3.77657	3.60111
ARP4	1	6.62867	8.93022
ARP7	1	2.75017	1.97826
ARP8	1	5.42033	7.62127
ARX1	1	6.60175	7.55839
ASC1	1	6.76223	6.37646
ATG8	1	2.0306	1.99442
ATP1	1	6.27989	6.25322
ATP2	1	4.43767	3.92395
ATP3	1	2.71627	2.42152
ATP5	1	1.61471	1.00848
BAT2	1	3.62418	3.39823
BBC1	1	6.65458	5.88406
BDF1	1	4.21177	5.78085
BDH1	1	4.84858	3.26989
BDP1	1	8.54221	16.6113
BFR1	1	9.92604	11.8592
BGL2	1	5.41068	3.6455
BMH1	1	2.99623	2.80225
BRE1	1	5.34183	4.79833
BRF1	1	6.57773	13.0295
BRN1	1	4.82231	5.48483
BRX1	1	8.69294	5.91943
CAD1	1	7.07056	12.1734
CAM1	1	3.59521	4.35132
CAR1	1	1.8474	1.01214
CAT2	1	5.21203	3.91218
CBF1	1	3.12279	7.34707
CBF5	1	9.98369	10.96
CBR1	1	2.75363	3.3351
CCT3	1	3.82546	3.33266
CCT4	1	4.88646	5.86323
CCT8	1	5.95129	6.1504
CDC10	1	5.70352	9.70349
CDC12	1	5.50637	5.19931
CDC19	1	4.27027	3.40142
CDC24	1	7.62959	7.64571
CDC3	1	3.77627	5.74031
CDC60	1	5.45993	12.5723
CDS1	1	4.87967	6.18537
CFT2	1	3.26466	3.7011
CHC1	1	4.69789	4.23981
CHD1	1	4.31873	5.95297
CIC1	1	11.106	8.49856
CIT1	1	11.8354	5.46886
CKA1	1	12.9563	7.23454
CKA2	1	4.96553	3.44839
CLU1	1	14.7721	13.9672
CMR1	1	11.5759	24.5689
CNM67	1	5.78945	4.77716
COP1	1	3.43819	2.8054
COR1	1	8.88923	4.14438
COX2	1	4.76804	3.08219
CPA2	1	2.06044	3.49539
CPR1	1	4.21565	1.71307
CPS1	1	4.13596	3.19123
CRC1	1	4.76044	3.76315
CRH1	1	1.99062	1.36301
CRM1	1	3.74367	3.52923
CRP1	1	7.73339	8.04813
CRZ1	1	7.16924	11.1898
CSE4	1	3.02619	6.38629
CST6	1	4.77535	3.46572
CTA1	1	14.8334	11.5037
CUE5	1	5.51015	3.20201
CWP1	1	14.2709	3.4515
CYC1	1	2.09465	1.55022
CYT1	1	6.92796	3.20836
DBP2	1	4.85371	4.73882
DBP3	1	3.89069	4.27046
DBP5	1	4.70145	15.8201
DED1	1	9.67708	11.0637
DED81	1	5.59174	8.02965
DEF1	1	3.57139	3.90652
DHH1	1	6.79059	8.05958
DIS3	1	2.55899	1.85794
DLD1	1	5.9138	3.71293
DMA2	1	5.82675	5.98185
DMC1	1	5.65462	3.26492
DNM1	1	4.55108	4.98066
DOT5	1	5.43965	6.13302
DPM1	1	8.02736	9.27666
DPS1	1	5.69344	6.77117
DST1	1	9.70948	6.871
DUG1	1	3.27995	3.70417
EAF3	1	5.00969	5.76949
EBP2	1	9.09869	6.85681
EDE1	1	2.55765	5.62168
EFT1	1	4.86631	4.95512
EGD1	1	15.5622	21.5713
EHT1	1	2.50329	5.16918
EIS1	1	4.37249	3.07822
ENO1	1	5.13649	4.65785
ENO2	1	3.63646	2.95811
EPL1	1	4.73069	5.13345
ERB1	1	9.02375	6.06928
ERG10	1	6.54853	5.81237
ERG13	1	2.16426	2.2283
ERG20	1	3.94142	5.18877
ERG27	1	3.7596	3.39807
ERG6	1	3.54061	2.76453
ERV29	1	5.34382	11.1055
ETR1	1	5.77027	4.89602
FAA1	1	3.97883	5.48251
FAA2	1	5.59806	5.11092
FAA4	1	3.48496	3.45125
FAS1	1	1.14056	1.00668
FBP1	1	6.36586	4.2724
FHL1	1	3.99954	5.62907
FOX2	1	19.9079	17.6023
FPR3	1	16.0214	6.27005
FRA1	1	3.84223	5.18559
FRS1	1	5.27034	9.30009
FRS2	1	3.02119	5.80595
FUM1	1	5.62723	5.25918
FUN12	1	4.38675	9.13227
GAR1	1	5.49147	5.60696
GAS1	1	3.80291	3.74128
GCD11	1	7.63728	8.93461
GCN2	1	7.20747	4.37846
GCN5	1	2.18029	2.62342
GCV1	1	3.28686	3.29536
GCV2	1	4.51114	4.13215
GDB1	1	3.10809	2.81902
GDH1	1	2.81609	1.96948
GDH2	1	4.70863	5.00347
GDI1	1	3.47804	6.64353
GET4	1	10.3507	7.65083
GGA1	1	2.79114	4.26076
GGA2	1	3.59968	3.62161
GLC3	1	3.33771	2.99253
GLK1	1	5.40771	4.48143
GLN1	1	4.33115	3.78933
GLO3	1	6.00724	7.13155
GLR1	1	3.45757	4.05477
GLT1	1	5.80443	10.9945
GND1	1	2.84204	2.64449
GPD1	1	3.66268	4.21261
GPH1	1	3.52824	3.02625
GPM1	1	4.33984	1.80879
GPT2	1	4.6244	5.22226
GRS1	1	4.05083	4.50102
GSP2	1	19.0005	34.1388
GSY1	1	2.9383	2.87573
GTS1	1	4.28243	5.93554
GTT3	1	3.56519	5.98817
GUS1	1	5.4534	7.13007
GUT2	1	3.41692	3.27454
HAS1	1	6.24754	4.63467
HCR1	1	5.23035	2.84246
HEF3	1	3.46874	4.15719
HFD1	1	8.00081	8.59873
HHF1	1	2.99073	12.2518
HHO1	1	17.7514	28.8114
HHT1	1	3.97811	19.3752
HIR1	1	2.54404	4.87979
HIR2	1	6.51241	11.7774
HIR3	1	3.0451	5.75119
HIS3	1	82.4529	57.4896
HMO1	1	7.96765	13.9997
HOM2	1	2.99327	2.41074
HOM6	1	7.60765	9.02965
HOP1	1	11.8068	10.6846
HOS3	1	3.34559	5.76489
HPC2	1	3.69429	4.77021
HRK1	1	7.84345	3.09551
HRR25	1	6.91098	5.72233
HSC82	1	5.50605	4.84279
HSP104	1	3.63131	4.34883
HSP150	1	10.4434	1.55974
HSP60	1	2.93743	2.79733
HSP82	1	8.82896	6.50842
HSV2	1	2.52229	4.233
HTA1|HTA2	1	26.7728	43.3837
HTB1	1	13.2177	32.9812
HTB2	1	11.4774	31.5171
HTS1	1	9.269	10.1085
HttQx_EGFP	1	1.80411	2.24685
HTZ1	1	2.4904	5.35551
HYP2	1	3.03602	2.28584
ICL1	1	5.70331	5.90123
IDH1	1	2.70922	2.72839
IDP2	1	6.05471	6.75569
IDP3	1	3.60813	3.00673
IES1	1	2.70621	2.69859
IES2	1	3.91007	5.58625
IFM1	1	3.71897	3.85373
ILV2	1	2.04303	2.03513
IMD4	1	5.53183	5.14068
IMG1	1	7.28334	6.01087
IMG2	1	3.81683	1.82523
IMH1	1	4.87031	4.48104
INO1	1	5.51876	4.88888
INO80	1	5.98651	5.83516
IOC2	1	7.69596	13.5689
IOC3	1	6.97096	13.8078
IPI3	1	5.70609	4.89892
IPP1	1	5.40904	3.85631
IRR1	1	10.1169	9.17199
IST1	1	2.92165	2.2521
IST2	1	5.01962	5.61044
ISW1	1	6.85492	18.3071
ISW2	1	4.98726	6.01963
JHD1	1	3.75488	5.79234
JIP5	1	4.86914	5.94536
KAP95	1	11.4898	5.75363
KAR2	1	2.77874	4.65415
KGD1	1	5.90424	4.77858
KGD2	1	8.92135	5.2858
KIN1	1	4.29202	4.37353
KIN2	1	32.1979	3.19172
KNS1	1	4.69169	4.77992
KRS1	1	2.3357	2.45702
LAP3	1	5.55	5.63426
LAT1	1	5.69353	5.90412
LEU4	1	6.73117	6.88272
LOC1	1	6.4814	16.0546
LPD1	1	6.26119	7.26958
LPX1	1	7.25704	5.98026
LSB3	1	10.5069	20.9431
LSC1	1	3.89377	4.72268
LSC2	1	4.32322	4.42496
LSM12	1	3.35302	5.18283
LSP1	1	5.14361	3.46657
LYS1	1	2.64247	3.55829
MAK21	1	5.18739	4.68007
MBF1	1	2.71025	1.22523
MCK1	1	6.92183	4.94441
MCM3	1	3.18809	6.11999
MCM4	1	4.82605	4.68451
MDG1	1	5.87208	6.94206
MDH2	1	9.01863	8.68752
MDH3	1	12.2747	8.14623
MDJ1	1	4.42431	3.49142
MDM38	1	4.15117	3.25544
MET17	1	7.20843	6.11997
MET6	1	5.43896	4.69097
MGA2	1	3.12306	5.46131
MGM101	1	7.48371	11.9897
MIR1	1	10.8589	7.59985
MIS1	1	7.78798	6.9754
MKT1	1	3.3562	4.72781
MLH1	1	5.50679	6.26633
MLS1	1	4.96484	4.10585
MND1	1	8.40506	7.33443
MOT1	1	6.09724	7.41358
MPH1	1	3.39032	6.26521
MRM1	1	7.386	5.30658
MRP20	1	9.54782	3.69854
MRP7	1	9.2246	7.64117
MRPL10	1	7.8548	8.59654
MRPL11	1	6.5386	6.42387
MRPL16	1	12.3669	7.87472
MRPL17	1	8.27945	5.33362
MRPL22	1	12.7836	8.60697
MRPL24	1	6.798	5.38997
MRPL25	1	2.32749	2.13434
MRPL3	1	4.84764	3.17423
MRPL32	1	5.97249	7.00068
MRPL35	1	11.0543	6.28543
MRPL36	1	4.10483	3.73724
MRPL40	1	3.40081	2.48482
MRPL9	1	13.9621	9.79981
MRPS17	1	5.36237	7.79411
MRPS28	1	6.00613	10.4283
MRPS35	1	4.79666	4.10022
MRPS5	1	21.618	9.099
MRPS9	1	8.82153	6.38305
MRT4	1	6.31234	7.80363
MSD1	1	5.05467	5.03424
MSH1	1	5.46608	9.26807
MSH2	1	1.32302	2.22365
MSH6	1	10.4799	16.9444
MSS116	1	9.31863	9.78497
MST1	1	6.07421	9.37479
MSY1	1	8.25345	7.42526
MVD1	1	4.53068	3.65105
MYO2	1	5.02405	3.40381
MYO3	1	6.93171	6.04384
NAM7	1	4.75615	4.46065
NAM9	1	19.9485	14.4653
NAT1	1	6.91703	7.77762
NAT10	1	5.00707	5.18547
NCE102	1	1.86066	1.79773
NDI1	1	8.71174	5.2872
NGG1	1	5.92406	5.41379
NHP2	1	7.24152	9.42022
NHP6A	1	5.72549	10.9214
NHP6B	1	11.6257	17.9882
NIC96	1	3.23183	3.46995
NIP1	1	5.71869	5.393
NOC2	1	5.20707	4.43478
NOG1	1	7.5276	5.47002
NOP1	1	4.84958	6.22165
NOP12	1	5.29837	4.46792
NOP13	1	4.82959	5.20247
NOP16	1	5.77026	4.55056
NOP2	1	8.23678	8.45432
NOP56	1	6.06495	6.77306
NOP58	1	4.96024	4.97116
NOP7	1	8.74874	5.8811
NPL6	1	4.71438	5.61494
NSA1	1	9.94091	7.90845
NSR1	1	18.7659	10.0073
NTH1	1	2.57589	3.73525
NTO1	1	3.43309	12.3144
NUP145	1	3.87443	3.764
NUS1	1	5.89944	7.0837
OAF1	1	3.4224	3.76622
OLA1	1	3.20762	4.85416
OLE1	1	3.41023	3.79301
OSM1	1	4.24726	4.46219
P1707_RE|RTN1	1	2.97697	2.86732
PAB1	1	2.7197	3.4679
PAT1	1	9.00782	9.48451
PBP1	1	3.26182	3.89863
PCK1	1	5.1877	4.8697
PCS60	1	5.89315	3.61921
PCT1	1	7.58749	11.0495
PDA1	1	6.92283	7.20086
PDB1	1	2.70675	1.98784
PDC1	1	7.71895	5.8078
PDE2	1	5.27562	9.32881
PDH1	1	6.47487	7.42555
PDI1	1	6.42631	7.37922
PDR16	1	2.07869	2.53656
PDS5	1	5.54814	3.67632
PEP4	1	4.40911	4.53023
PET10	1	1.83246	2.91627
PET127	1	4.25278	3.42094
PET9	1	7.51329	5.84121
PFK1	1	6.11105	5.8267
PFK2	1	6.13676	4.85565
PGI1	1	5.33819	5.01026
PGK1	1	2.95438	2.75584
PGM2	1	5.3727	4.56058
PHO2	1	4.85856	6.3719
PIL1	1	9.21595	6.31443
PIP2	1	4.88083	8.44194
PMA1	1	7.17641	6.85156
PMT1	1	4.02035	4.42446
PMT2	1	2.78574	2.91416
POB3	1	8.92151	19.1062
POL30	1	8.1185	5.18259
POM33	1	4.74652	6.48051
POR1	1	6.17292	3.78829
POX1	1	8.72246	7.10348
PRB1	1	4.6879	3.37382
PRE3	1	3.48822	3.07441
PRE7	1	4.03856	3.28438
PRO3	1	3.76282	3.98305
PRP19	1	5.79842	5.47785
PRP43	1	9.76429	7.83904
PRS1	1	5.78365	3.20177
PRS3	1	1.88253	2.30205
PRT1	1	7.04395	7.49905
PSA1	1	6.13122	5.13216
PSH1	1	7.85313	8.76166
PUF3	1	11.1465	12.0182
PUF6	1	7.69588	7.0229
PUP2	1	5.10201	5.14942
PWP1	1	3.66289	2.61261
PYC1	1	4.1903	4.5563
QCR2	1	8.5367	4.60574
RAD16	1	2.99953	5.22879
RAD51	1	2.66843	2.43704
RAD52	1	7.20397	6.96539
RAP1	1	2.44181	6.1714
RAS2	1	1.95321	1.94757
RBG1	1	3.07453	3.11666
REB1	1	10.7852	19.5551
REC107	1	8.78669	15.2119
REC8	1	8.9133	7.44228
RED1	1	17.1185	13.6026
REP1	1	7.67126	5.95937
REP2	1	3.34176	7.21157
RET2	1	3.4127	3.23967
RFA1	1	4.9824	9.1509
RFC1	1	3.26994	4.29363
RFC2	1	7.0828	7.19845
RFC3	1	5.13906	5.57966
RGI1	1	4.04477	3.35521
RGI2	1	14.1373	16.8784
RIM1	1	6.90377	13.1845
RIM4	1	11.9848	8.37717
RIO2	1	5.79473	3.6938
RLI1	1	5.54607	6.14877
RLP7	1	2.31902	2.87335
RML2	1	16.6756	11.6057
RNP1	1	20.6321	21.906
RNR1	1	4.57433	5.04563
RNR4	1	3.96693	3.72889
RPA135	1	6.17786	6.28261
RPA190	1	5.19065	6.75904
RPA49	1	4.27858	4.66313
RPB11	1	3.28874	5.27244
RPB2	1	5.09332	12.1885
RPB3	1	4.05194	8.71416
RPB4	1	2.00219	2.66109
RPB5	1	6.29318	9.49814
RPB8	1	6.60772	11.4987
RPC10	1	10.9517	30.5039
RPC82	1	5.99645	13.5815
RPG1	1	4.75814	4.75311
RPH1	1	9.37937	15.3413
RPL10	1	3.55613	2.81572
RPL11A|RPL11B	1	18.2859	27.9202
RPL12A|RPL12B	1	4.28533	1.13158
RPL13B|RPL13A	1	9.94484	6.23345
RPL14A|RPL14B	1	18.7733	9.63486
RPL15A	1	30.8028	17.5678
RPL16A	1	20.7853	11.6054
RPL16B	1	12.6451	6.23844
RPL18A|RPL18B	1	15.363	11.9254
RPL19A|RPL19B	1	14.9965	22.4538
RPL1A|RPL1B	1	25.3589	14.4377
RPL20A|RPL20B	1	8.08286	5.24713
RPL21A|RPL21B	1	10.6908	4.85847
RPL22A	1	2.88741	3.70872
RPL24A	1	6.74282	4.91761
RPL24B	1	4.81156	3.38833
RPL25	1	8.02189	5.19992
RPL27A|RPL27B	1	12.238	6.98554
RPL28	1	11.7909	5.95908
RPL29	1	14.98	14.793
RPL2A|RPL2B	1	25.9814	9.89492
RPL3	1	5.44739	7.50791
RPL30	1	18.5409	15.2364
RPL32	1	18.5292	12.481
RPL34B|RPL34A	1	25.2919	10.5895
RPL35A|RPL35B	1	7.41088	7.59201
RPL36B	1	28.3078	9.52814
RPL37A	1	10.9796	9.44385
RPL42A|RPL42B	1	17.8635	10.9654
RPL43A|RPL43B	1	12.4376	6.96206
RPL4A	1	12.5566	7.72008
RPL5	1	3.93814	3.92007
RPL6A	1	10.4887	5.03179
RPL6B	1	9.64656	4.50741
RPL7A	1	20.7419	15.359
RPL8A	1	10.6304	4.58204
RPL9B	1	7.71809	7.5658
RPN1	1	4.70321	4.26773
RPN2	1	4.58396	5.37448
RPN3	1	5.73292	4.57042
RPN6	1	3.0977	3.09252
RPO21	1	8.88871	18.6279
RPO31	1	2.70836	4.01941
RPP0	1	23.9079	7.56725
RPS0A	1	1.89844	1.76451
RPS11A|RPS11B	1	10.4474	6.27383
RPS12	1	2.51087	2.70676
RPS13	1	9.73492	3.66086
RPS14A|RPS14B	1	3.56704	3.31226
RPS15	1	13.029	7.89189
RPS16A|RPS16B	1	7.28972	6.19838
RPS17A|RPS17B	1	7.75249	5.44648
RPS18A|RPS18B	1	16.8082	11.4696
RPS19A|RPS19B	1	1.67594	1.90196
RPS1A	1	28.8439	24.3145
RPS1B	1	7.2529	4.92826
RPS2	1	19.9958	22.2264
RPS20	1	7.41838	6.88213
RPS23A|RPS23B	1	17.2997	10.5605
RPS24A|RPS24B	1	30.7152	25.3444
RPS25B|RPS25A	1	10.1821	6.29636
RPS27A|RPS27B	1	3.91697	2.56408
RPS28B|RPS28A	1	2.49951	2.29216
RPS29A	1	3.31799	2.18943
RPS3	1	7.54152	8.05178
RPS30A|RPS30B	1	5.86686	9.43036
RPS31	1	5.10809	7.62343
RPS4A|RPS4B	1	13.2043	7.71388
RPS5	1	3.09171	3.11949
RPS6A|RPS6B	1	7.77208	6.27708
RPS7A	1	14.5981	18.6854
RPS7B	1	5.40044	4.31483
RPS8A|RPS8B	1	33.485	17.1628
RPT1	1	3.03504	2.94942
RPT2	1	4.29118	3.67146
RPT3	1	5.64572	5.1209
RPT4	1	5.657	4.90011
RPT6	1	5.15404	4.50422
RQC2	1	5.69173	3.56264
RRF1	1	9.72879	3.69459
RRN5	1	5.51863	5.78681
RRP14	1	4.99401	4.91564
RRP5	1	3.71606	3.55897
RSA4	1	7.82387	5.79844
RSC2	1	7.32875	8.09326
RSC8	1	6.52602	6.93126
RSC9	1	5.61463	6.9406
RSF1	1	7.37314	13.5376
RSM18	1	6.01526	3.2642
RSM23	1	13.1703	6.9712
RSM24	1	23.4215	11.5247
RSP5	1	4.83182	6.68846
RSR1	1	10.696	10.3576
RTG2	1	3.43149	3.86186
RTS1	1	8.45233	7.47844
RTS2	1	3.94702	5.18075
RTT106	1	18.1329	58.6037
RVB1	1	4.58638	5.95021
RVB2	1	5.95535	6.86144
RVS161	1	5.14412	4.46474
SAC6	1	5.35361	4.23611
SAH1	1	4.69138	7.19981
SAM1	1	5.51709	5.68442
SAM2	1	2.09761	2.09345
SAS3	1	7.37957	17.0584
SBP1	1	2.67098	2.93374
SCC2	1	4.81989	4.31291
SCL1	1	3.55471	3.25132
SCP160	1	3.42279	5.84801
SCS2	1	4.83413	4.72435
SCY1	1	4.85934	4.16925
SDH1	1	3.87883	3.3884
SDH2	1	4.91543	4.83454
SDS24	1	2.75958	2.78863
SEC18	1	3.38824	3.24841
SEC23	1	3.42509	4.72829
SEC24	1	6.55808	7.24124
SEC26	1	4.07428	3.96968
SEC27	1	4.05833	3.74118
SEC4	1	2.6978	4.23364
SEC53	1	2.77423	2.01027
SEC61	1	5.83426	7.65949
SEC63	1	6.12629	7.82274
SEC7	1	3.14364	3.21501
SEC8	1	3.20982	4.02484
SEG1	1	4.936	4.31759
SES1	1	5.14625	8.57384
SEY1	1	2.27791	2.58242
SGV1	1	2.46261	2.40657
SHE10	1	2.43318	6.83266
SHM1	1	7.72956	9.56931
SHM2	1	6.55779	6.20027
SHS1	1	4.34432	5.62197
SIS1	1	1.34187	0.845798
SKO1	1	13.5189	24.7362
SLA1	1	4.60415	6.52355
SLI15	1	4.17101	3.28384
SLM1	1	15.3053	8.12546
SMC1	1	7.76938	8.52861
SMC2	1	4.76552	7.14866
SMC3	1	9.50652	10.0223
SMC4	1	3.87605	4.26961
SMC5	1	2.61227	2.32252
SMC6	1	5.29713	4.68885
SMY2	1	5.58621	4.68522
SNF1	1	8.06419	1.82663
SOF1	1	2.8042	2.66399
SPB4	1	6.90609	4.87194
SPF1	1	3.57013	4.79363
SPO14	1	9.14147	1.62726
SPO22	1	3.54018	2.83676
SPP1	1	7.79623	16.5973
SPP41	1	5.11465	6.55187
SPS19	1	6.86439	7.90236
SPT15	1	4.5664	8.89447
SPT16	1	3.90329	5.36507
SPT5	1	4.85367	8.27232
SPT6	1	8.12253	6.0444
SPT7	1	6.2794	5.95723
SRL2	1	3.91351	2.5006
SRM1	1	5.62069	11.5841
SRO9	1	9.04719	2.55787
SRP1	1	8.86961	11.0544
SRP40	1	9.6881	10.3757
SRP54	1	2.95053	3.19888
SRP72	1	8.44517	9.95547
SSA1	1	1.56889	1.84906
SSA3	1	2.75627	2.44964
SSB1|SSB2	1	5.35032	7.41725
SSC1	1	2.5531	3.57984
SSD1	1	8.75326	8.50718
SSE1	1	5.29169	5.30522
SSZ1	1	5.77582	7.58347
STE24	1	5.49466	7.15787
STH1	1	3.4958	3.10219
STM1	1	14.0082	14.1169
SUB1	1	4.49384	10.2118
SUB2	1	2.93817	2.53606
SUC2	1	8.41651	8.10891
SUI2	1	8.05071	11.2853
SUI3	1	18.2827	35.2556
SUP35	1	7.97943	13.0503
SUP45	1	3.62757	4.53283
SWC3	1	5.10072	11.8348
SWC4	1	10.8805	14.0874
SWR1	1	9.73692	13.2383
SYP1	1	2.94291	3.29271
TAF1	1	3.20829	3.43461
TAF14	1	3.95288	5.80447
TAF5	1	5.63766	6.05581
TAF6	1	5.51354	5.80111
TAL1	1	4.65987	5.24104
TCP1	1	4.26518	4.40232
TDH1	1	3.95581	1.48916
TED1	1	4.35535	5.36469
TEF1	1	4.83464	4.54231
TEF4	1	7.83921	9.69519
TES1	1	7.17415	4.88463
TFC1	1	8.80568	12.1469
TFC3	1	4.59198	6.55651
TFC4	1	6.97353	9.53244
TFC6	1	14.9947	19.5263
TFC8	1	4.78606	10.5459
TGS1	1	4.94938	2.97457
THO1	1	2.96437	3.22435
THS1	1	20.8054	22.5458
TIF1	1	3.56606	3.77237
TIF34	1	5.51626	5.86836
TIF35	1	4.76302	4.58419
TIF4631	1	4.48592	7.96649
TIF5	1	4.18519	4.63026
TIM44	1	1.80475	2.08647
TKL1	1	8.1984	6.44956
TMA19	1	5.78274	4.6702
TMA22	1	11.2518	9.7795
TMA64	1	3.76287	4.99743
TMA7	1	5.1779	5.57055
TOP1	1	3.37932	4.72861
TOP2	1	6.16181	8.34461
TOR2	1	12.5436	3.15382
TPI1	1	2.18083	1.40932
TPS1	1	3.97292	3.6935
TPS2	1	3.14523	2.34775
TRA1	1	8.04005	10.3773
TRI1	1	9.1108	19.7528
TRM1	1	3.59843	3.40915
TRP3	1	3.94099	3.15788
TSA1	1	3.31636	2.51348
TSL1	1	4.34682	5.20399
TUB1|TUB3	1	6.18689	3.33525
TUB2	1	4.65902	2.48199
TUF1	1	2.52734	1.7672
TYS1	1	6.34499	6.61612
UBA1	1	5.32718	4.59346
UBP3	1	8.02594	9.58001
UBP6	1	4.43076	7.24586
UBP7	1	4.21466	2.38682
UGP1	1	6.39187	6.56568
ULS1	1	3.63267	6.83123
UME6	1	5.481	8.68726
URA2	1	5.90407	7.8426
UTP23	1	2.49741	5.49594
UTP5	1	2.74749	3.46409
VAC8	1	3.10113	4.31019
VAS1	1	2.94665	3.57668
VID27	1	3.04324	2.0294
VMA1	1	3.15468	3.52653
VMA13	1	4.10985	3.24691
VMA2	1	8.02379	6.4265
VPS1	1	5.12387	6.29561
VPS17	1	4.41173	3.7645
VPS33	1	5.73452	5.05997
VPS5	1	5.04296	5.66736
VPS72	1	2.75824	7.11276
VTC4	1	5.45344	4.73369
WRS1	1	5.91824	11.6495
WTM1	1	8.15568	4.21747
XDJ1	1	7.74542	4.67611
XRN1	1	4.75184	4.52157
YAF9	1	5.8708	7.18357
YAT1	1	8.22995	10.1461
YAT2	1	3.72958	3.52996
YBT1	1	2.53824	2.66861
YCG1	1	3.92966	6.35943
YCS4	1	6.85252	7.16136
YDR115W	1	5.13593	3.29877
YDR341C	1	4.25152	4.71983
YEF3	1	6.33428	7.22053
YEL020C	1	7.87739	6.00591
YER079W	1	4.40851	3.81523
YFR006W	1	3.56528	3.39198
YGL081W	1	3.27173	3.06769
YGL108C	1	5.68545	5.14537
YGR130C	1	9.9992	5.25565
YGR169C-A	1	13.2809	9.29535
YGR266W	1	5.90226	3.50555
YHM2	1	10.1676	7.71048
YHR020W	1	2.13982	3.26619
YHR097C	1	11.4477	5.68337
YJR005C-A	1	7.84125	4.19135
YLR278C	1	4.06481	4.34235
YLR455W	1	3.38938	12.5395
YMR027W	1	3.79279	2.7161
YNG1	1	6.01991	15.6149
YNL040W	1	2.81472	3.51265
YNL115C	1	2.64092	2.17485
YNL181W	1	4.39881	5.08906
YNL247W	1	4.6432	5.95224
YNR021W	1	4.96953	6.77477
YPK2	1	12.1122	4.82812
YPT1	1	2.65944	2.99687
YPT7	1	2.48802	2.66274
YRA1	1	15.8188	20.753
YTA7	1	6.59705	22.5898
YTM1	1	11.6955	5.45313
ZIP1	1	8.50582	6.73265
ZTA1	1	4.10089	5.87526
ZUO1	1	5.2857	8.80824
