# Supplementary material for: Novel mechanistic insights into the role of Mer2 as the keystone of meiotic DNA break formation
Source: eLife journal article supplement (doi:10.7554/elife.72330), 2021-12-24
Supplement: data2 [file elife-72330-data2-v2.zip]

comparison: MUT\_vs\_Control\_against\_WT\_vs\_Control

x.name: WT\_vs\_Control

y.name: MUT\_vs\_Control

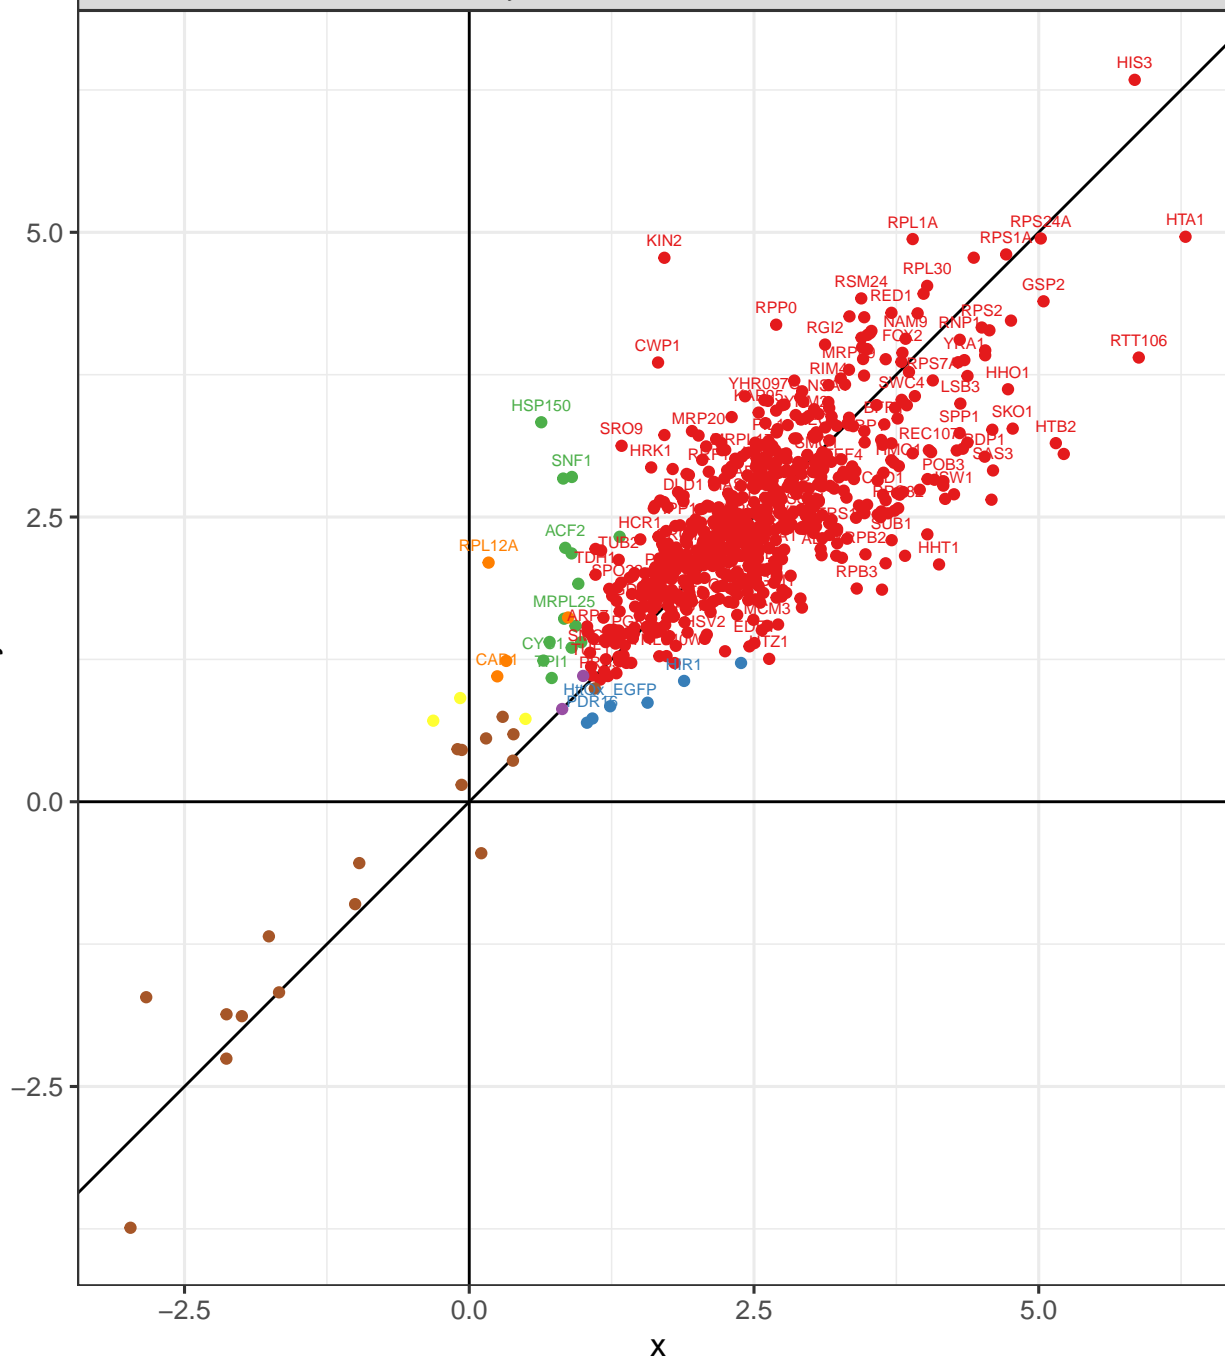

hit\_x\_and\_y

- hit x – hit y
- hit x – candidate y
- candidate x – hit y
- candidate x – candidate y
- no hit x – hit y
- no hit x – candidate y
- no hit x – no hit y
