# Supplementary material for: Novel mechanistic insights into the role of Mer2 as the keystone of meiotic DNA break formation
Source: eLife journal article supplement (doi:10.7554/elife.72330), 2021-12-24
Supplement: data2 [file Fold_change_correlation_data_V1.xlsx]

## Sheet: Fold_change_correlation_data_V1
gene_name	x	x.name	x.hit	y	y.name	y.hit	comparison	hit_annotation	hit_x_and_y
YRA1	4.34703	WT_vs_Control	enriched hit	3.87754	MUT_vs_Control	enriched hit	MUT_vs_Control_against_WT_vs_Control	enriched no hit	hit x - hit y
RPS2	4.50001	WT_vs_Control	enriched hit	4.16389	MUT_vs_Control	enriched hit	MUT_vs_Control_against_WT_vs_Control	enriched no hit	hit x - hit y
REC107	4.03571	WT_vs_Control	enriched hit	3.08636	MUT_vs_Control	enriched hit	MUT_vs_Control_against_WT_vs_Control	enriched candidate	hit x - hit y
RPC82	3.76613	WT_vs_Control	enriched hit	2.57776	MUT_vs_Control	enriched hit	MUT_vs_Control_against_WT_vs_Control	enriched hit	hit x - hit y
RPL11A|RPL11B	4.56703	WT_vs_Control	enriched hit	4.13932	MUT_vs_Control	enriched hit	MUT_vs_Control_against_WT_vs_Control	enriched no hit	hit x - hit y
BFR1	3.64475	WT_vs_Control	enriched hit	3.31392	MUT_vs_Control	enriched hit	MUT_vs_Control_against_WT_vs_Control	enriched no hit	hit x - hit y
FRS1	3.22884	WT_vs_Control	enriched hit	2.3786	MUT_vs_Control	enriched hit	MUT_vs_Control_against_WT_vs_Control	enriched candidate	hit x - hit y
HIS3	5.84295	WT_vs_Control	enriched hit	6.33863	MUT_vs_Control	enriched hit	MUT_vs_Control_against_WT_vs_Control	enriched no hit	hit x - hit y
SRP1	3.47186	WT_vs_Control	enriched hit	3.15531	MUT_vs_Control	enriched hit	MUT_vs_Control_against_WT_vs_Control	enriched no hit	hit x - hit y
TEF4	3.28584	WT_vs_Control	enriched hit	2.89723	MUT_vs_Control	enriched hit	MUT_vs_Control_against_WT_vs_Control	enriched no hit	hit x - hit y
MRPL9	3.33395	WT_vs_Control	enriched hit	3.79292	MUT_vs_Control	enriched hit	MUT_vs_Control_against_WT_vs_Control	enriched no hit	hit x - hit y
CDC60	3.60998	WT_vs_Control	enriched hit	2.49776	MUT_vs_Control	enriched hit	MUT_vs_Control_against_WT_vs_Control	enriched hit	hit x - hit y
CTA1	3.45774	WT_vs_Control	enriched hit	3.88732	MUT_vs_Control	enriched hit	MUT_vs_Control_against_WT_vs_Control	enriched no hit	hit x - hit y
HHT1	4.12496	WT_vs_Control	enriched hit	2.08356	MUT_vs_Control	enriched hit	MUT_vs_Control_against_WT_vs_Control	enriched hit	hit x - hit y
RPS1A	4.71394	WT_vs_Control	enriched hit	4.8057	MUT_vs_Control	enriched hit	MUT_vs_Control_against_WT_vs_Control	enriched no hit	hit x - hit y
HTS1	3.46923	WT_vs_Control	enriched hit	3.2535	MUT_vs_Control	enriched hit	MUT_vs_Control_against_WT_vs_Control	enriched no hit	hit x - hit y
SPP1	4.30595	WT_vs_Control	enriched hit	3.23704	MUT_vs_Control	enriched hit	MUT_vs_Control_against_WT_vs_Control	enriched candidate	hit x - hit y
ZUO1	3.16458	WT_vs_Control	enriched hit	2.34237	MUT_vs_Control	enriched hit	MUT_vs_Control_against_WT_vs_Control	enriched candidate	hit x - hit y
SMC1	3.05153	WT_vs_Control	enriched hit	3.006	MUT_vs_Control	enriched hit	MUT_vs_Control_against_WT_vs_Control	enriched no hit	hit x - hit y
DED81	3.00168	WT_vs_Control	enriched hit	2.44676	MUT_vs_Control	enriched hit	MUT_vs_Control_against_WT_vs_Control	enriched no hit	hit x - hit y
YHM2	2.9596	WT_vs_Control	enriched hit	3.36944	MUT_vs_Control	enriched hit	MUT_vs_Control_against_WT_vs_Control	enriched no hit	hit x - hit y
SUP35	3.63086	WT_vs_Control	enriched hit	3.13434	MUT_vs_Control	enriched hit	MUT_vs_Control_against_WT_vs_Control	enriched no hit	hit x - hit y
MRPS17	2.97274	WT_vs_Control	enriched hit	2.40261	MUT_vs_Control	enriched hit	MUT_vs_Control_against_WT_vs_Control	enriched no hit	hit x - hit y
MRT4	2.97075	WT_vs_Control	enriched hit	2.66624	MUT_vs_Control	enriched hit	MUT_vs_Control_against_WT_vs_Control	enriched no hit	hit x - hit y
SSZ1	2.95713	WT_vs_Control	enriched hit	2.511	MUT_vs_Control	enriched hit	MUT_vs_Control_against_WT_vs_Control	enriched no hit	hit x - hit y
DPM1	3.10851	WT_vs_Control	enriched hit	2.92076	MUT_vs_Control	enriched hit	MUT_vs_Control_against_WT_vs_Control	enriched no hit	hit x - hit y
MGM101	3.63763	WT_vs_Control	enriched hit	2.88879	MUT_vs_Control	enriched hit	MUT_vs_Control_against_WT_vs_Control	enriched candidate	hit x - hit y
RIM4	3.15443	WT_vs_Control	enriched hit	3.65823	MUT_vs_Control	enriched hit	MUT_vs_Control_against_WT_vs_Control	enriched no hit	hit x - hit y
RED1	3.70699	WT_vs_Control	enriched hit	4.29308	MUT_vs_Control	enriched hit	MUT_vs_Control_against_WT_vs_Control	enriched candidate	hit x - hit y
SUI3	4.7567	WT_vs_Control	enriched hit	4.2246	MUT_vs_Control	enriched hit	MUT_vs_Control_against_WT_vs_Control	enriched no hit	hit x - hit y
NAT1	2.93062	WT_vs_Control	enriched hit	2.76809	MUT_vs_Control	enriched hit	MUT_vs_Control_against_WT_vs_Control	enriched no hit	hit x - hit y
TFC6	4.29295	WT_vs_Control	enriched hit	3.85933	MUT_vs_Control	enriched hit	MUT_vs_Control_against_WT_vs_Control	enriched no hit	hit x - hit y
ARP4	3.16768	WT_vs_Control	enriched hit	2.77345	MUT_vs_Control	enriched hit	MUT_vs_Control_against_WT_vs_Control	enriched no hit	hit x - hit y
NAM9	3.83144	WT_vs_Control	enriched hit	4.06518	MUT_vs_Control	enriched hit	MUT_vs_Control_against_WT_vs_Control	enriched no hit	hit x - hit y
RPS18A|RPS18B	3.53115	WT_vs_Control	enriched hit	4.13397	MUT_vs_Control	enriched hit	MUT_vs_Control_against_WT_vs_Control	enriched candidate	hit x - hit y
POB3	4.16344	WT_vs_Control	enriched hit	2.81462	MUT_vs_Control	enriched hit	MUT_vs_Control_against_WT_vs_Control	enriched hit	hit x - hit y
PRT1	2.98274	WT_vs_Control	enriched hit	2.75073	MUT_vs_Control	enriched hit	MUT_vs_Control_against_WT_vs_Control	enriched no hit	hit x - hit y
NUS1	2.84746	WT_vs_Control	enriched hit	2.54391	MUT_vs_Control	enriched hit	MUT_vs_Control_against_WT_vs_Control	enriched no hit	hit x - hit y
PSH1	3.09135	WT_vs_Control	enriched hit	2.8141	MUT_vs_Control	enriched hit	MUT_vs_Control_against_WT_vs_Control	enriched no hit	hit x - hit y
REC8	3.05626	WT_vs_Control	enriched hit	3.21217	MUT_vs_Control	enriched hit	MUT_vs_Control_against_WT_vs_Control	enriched no hit	hit x - hit y
TRI1	4.33369	WT_vs_Control	enriched hit	3.09965	MUT_vs_Control	enriched hit	MUT_vs_Control_against_WT_vs_Control	enriched hit	hit x - hit y
MRPS5	3.33853	WT_vs_Control	enriched hit	4.2618	MUT_vs_Control	enriched hit	MUT_vs_Control_against_WT_vs_Control	enriched candidate	hit x - hit y
RPS7A	4.07016	WT_vs_Control	enriched hit	3.6994	MUT_vs_Control	enriched hit	MUT_vs_Control_against_WT_vs_Control	enriched no hit	hit x - hit y
LPD1	2.85718	WT_vs_Control	enriched hit	2.74963	MUT_vs_Control	enriched hit	MUT_vs_Control_against_WT_vs_Control	enriched no hit	hit x - hit y
YEF3	2.87338	WT_vs_Control	enriched hit	2.7012	MUT_vs_Control	enriched hit	MUT_vs_Control_against_WT_vs_Control	enriched no hit	hit x - hit y
SSB1|SSB2	2.95733	WT_vs_Control	enriched hit	2.50984	MUT_vs_Control	enriched hit	MUT_vs_Control_against_WT_vs_Control	enriched no hit	hit x - hit y
SMC3	3.37127	WT_vs_Control	enriched hit	3.29772	MUT_vs_Control	enriched hit	MUT_vs_Control_against_WT_vs_Control	enriched no hit	hit x - hit y
NSR1	3.4682	WT_vs_Control	enriched hit	4.25402	MUT_vs_Control	enriched hit	MUT_vs_Control_against_WT_vs_Control	enriched candidate	hit x - hit y
YAF9	2.98564	WT_vs_Control	enriched hit	2.47034	MUT_vs_Control	enriched hit	MUT_vs_Control_against_WT_vs_Control	enriched no hit	hit x - hit y
THS1	4.5305	WT_vs_Control	enriched hit	3.96309	MUT_vs_Control	enriched hit	MUT_vs_Control_against_WT_vs_Control	enriched no hit	hit x - hit y
HFD1	3.17729	WT_vs_Control	enriched hit	2.98461	MUT_vs_Control	enriched hit	MUT_vs_Control_against_WT_vs_Control	enriched no hit	hit x - hit y
DED1	3.76112	WT_vs_Control	enriched hit	3.36521	MUT_vs_Control	enriched hit	MUT_vs_Control_against_WT_vs_Control	enriched no hit	hit x - hit y
RPL14A|RPL14B	3.4443	WT_vs_Control	enriched hit	4.07473	MUT_vs_Control	enriched hit	MUT_vs_Control_against_WT_vs_Control	enriched candidate	hit x - hit y
UGP1	2.70183	WT_vs_Control	enriched hit	2.71913	MUT_vs_Control	enriched hit	MUT_vs_Control_against_WT_vs_Control	enriched no hit	hit x - hit y
ABF2	3.09345	WT_vs_Control	enriched hit	2.16435	MUT_vs_Control	enriched hit	MUT_vs_Control_against_WT_vs_Control	enriched candidate	hit x - hit y
RSR1	3.22626	WT_vs_Control	enriched hit	3.30117	MUT_vs_Control	enriched hit	MUT_vs_Control_against_WT_vs_Control	enriched no hit	hit x - hit y
ACH1	2.98146	WT_vs_Control	enriched hit	3.38747	MUT_vs_Control	enriched hit	MUT_vs_Control_against_WT_vs_Control	enriched no hit	hit x - hit y
SUI2	3.61704	WT_vs_Control	enriched hit	3.17657	MUT_vs_Control	enriched hit	MUT_vs_Control_against_WT_vs_Control	enriched no hit	hit x - hit y
RFC2	2.8798	WT_vs_Control	enriched hit	2.91231	MUT_vs_Control	enriched hit	MUT_vs_Control_against_WT_vs_Control	enriched no hit	hit x - hit y
EGD1	4.37466	WT_vs_Control	enriched hit	3.73823	MUT_vs_Control	enriched hit	MUT_vs_Control_against_WT_vs_Control	enriched no hit	hit x - hit y
ACO1	3.07815	WT_vs_Control	enriched hit	3.02538	MUT_vs_Control	enriched hit	MUT_vs_Control_against_WT_vs_Control	enriched no hit	hit x - hit y
ARO4	2.74661	WT_vs_Control	enriched hit	2.54253	MUT_vs_Control	enriched hit	MUT_vs_Control_against_WT_vs_Control	enriched no hit	hit x - hit y
PDH1	3.05285	WT_vs_Control	enriched hit	2.65657	MUT_vs_Control	enriched hit	MUT_vs_Control_against_WT_vs_Control	enriched no hit	hit x - hit y
RNP1	4.30695	WT_vs_Control	enriched hit	4.0565	MUT_vs_Control	enriched hit	MUT_vs_Control_against_WT_vs_Control	enriched no hit	hit x - hit y
HMO1	3.77207	WT_vs_Control	enriched hit	2.94682	MUT_vs_Control	enriched hit	MUT_vs_Control_against_WT_vs_Control	enriched candidate	hit x - hit y
RSM23	2.85397	WT_vs_Control	enriched hit	3.69812	MUT_vs_Control	enriched hit	MUT_vs_Control_against_WT_vs_Control	enriched candidate	hit x - hit y
ARP8	3.04494	WT_vs_Control	enriched hit	2.41792	MUT_vs_Control	enriched hit	MUT_vs_Control_against_WT_vs_Control	enriched candidate	hit x - hit y
SWC4	3.79665	WT_vs_Control	enriched hit	3.52891	MUT_vs_Control	enriched hit	MUT_vs_Control_against_WT_vs_Control	enriched no hit	hit x - hit y
PIL1	2.62849	WT_vs_Control	enriched hit	3.16827	MUT_vs_Control	enriched hit	MUT_vs_Control_against_WT_vs_Control	enriched no hit	hit x - hit y
SLA1	2.71037	WT_vs_Control	enriched hit	2.18759	MUT_vs_Control	enriched hit	MUT_vs_Control_against_WT_vs_Control	enriched no hit	hit x - hit y
IOC3	3.65651	WT_vs_Control	enriched hit	2.64775	MUT_vs_Control	enriched hit	MUT_vs_Control_against_WT_vs_Control	enriched candidate	hit x - hit y
RVB1	2.63438	WT_vs_Control	enriched hit	2.22556	MUT_vs_Control	enriched hit	MUT_vs_Control_against_WT_vs_Control	enriched no hit	hit x - hit y
YLR455W	3.65619	WT_vs_Control	enriched hit	2.09364	MUT_vs_Control	enriched hit	MUT_vs_Control_against_WT_vs_Control	enriched hit	hit x - hit y
STM1	3.84198	WT_vs_Control	enriched hit	3.48126	MUT_vs_Control	enriched hit	MUT_vs_Control_against_WT_vs_Control	enriched no hit	hit x - hit y
IRR1	3.18033	WT_vs_Control	enriched hit	3.38376	MUT_vs_Control	enriched hit	MUT_vs_Control_against_WT_vs_Control	enriched no hit	hit x - hit y
IMG1	2.56705	WT_vs_Control	enriched hit	2.91818	MUT_vs_Control	enriched hit	MUT_vs_Control_against_WT_vs_Control	enriched no hit	hit x - hit y
RPS24A|RPS24B	5.0181	WT_vs_Control	enriched hit	4.94578	MUT_vs_Control	enriched hit	MUT_vs_Control_against_WT_vs_Control	enriched no hit	hit x - hit y
HSP82	2.74803	WT_vs_Control	enriched hit	3.04892	MUT_vs_Control	enriched hit	MUT_vs_Control_against_WT_vs_Control	enriched no hit	hit x - hit y
UBP6	2.7461	WT_vs_Control	enriched hit	2.1303	MUT_vs_Control	enriched hit	MUT_vs_Control_against_WT_vs_Control	enriched candidate	hit x - hit y
CAD1	3.63313	WT_vs_Control	enriched hit	2.69563	MUT_vs_Control	enriched hit	MUT_vs_Control_against_WT_vs_Control	enriched candidate	hit x - hit y
SHM1	3.07505	WT_vs_Control	enriched hit	2.77808	MUT_vs_Control	enriched hit	MUT_vs_Control_against_WT_vs_Control	enriched no hit	hit x - hit y
RPL30	4.02046	WT_vs_Control	enriched hit	4.52961	MUT_vs_Control	enriched hit	MUT_vs_Control_against_WT_vs_Control	enriched no hit	hit x - hit y
ISW1	4.25628	WT_vs_Control	enriched hit	2.69971	MUT_vs_Control	enriched hit	MUT_vs_Control_against_WT_vs_Control	enriched hit	hit x - hit y
NHP6A	3.45415	WT_vs_Control	enriched hit	2.54929	MUT_vs_Control	enriched hit	MUT_vs_Control_against_WT_vs_Control	enriched candidate	hit x - hit y
ATP1	2.67488	WT_vs_Control	enriched hit	2.73102	MUT_vs_Control	enriched hit	MUT_vs_Control_against_WT_vs_Control	enriched no hit	hit x - hit y
CIC1	3.12571	WT_vs_Control	enriched hit	3.28625	MUT_vs_Control	enriched hit	MUT_vs_Control_against_WT_vs_Control	enriched no hit	hit x - hit y
TKL1	2.66109	WT_vs_Control	enriched hit	3.12611	MUT_vs_Control	enriched hit	MUT_vs_Control_against_WT_vs_Control	enriched no hit	hit x - hit y
CLU1	3.91288	WT_vs_Control	enriched hit	3.56164	MUT_vs_Control	enriched hit	MUT_vs_Control_against_WT_vs_Control	enriched no hit	hit x - hit y
ASC1	2.74307	WT_vs_Control	enriched hit	2.65743	MUT_vs_Control	enriched hit	MUT_vs_Control_against_WT_vs_Control	enriched no hit	hit x - hit y
LEU4	3.02527	WT_vs_Control	enriched hit	2.89446	MUT_vs_Control	enriched hit	MUT_vs_Control_against_WT_vs_Control	enriched no hit	hit x - hit y
SEC63	2.98742	WT_vs_Control	enriched hit	2.48648	MUT_vs_Control	enriched hit	MUT_vs_Control_against_WT_vs_Control	enriched no hit	hit x - hit y
LPX1	2.59783	WT_vs_Control	enriched hit	2.83481	MUT_vs_Control	enriched hit	MUT_vs_Control_against_WT_vs_Control	enriched no hit	hit x - hit y
PMA1	2.68516	WT_vs_Control	enriched hit	2.87688	MUT_vs_Control	enriched hit	MUT_vs_Control_against_WT_vs_Control	enriched no hit	hit x - hit y
RPS16A|RPS16B	2.53229	WT_vs_Control	enriched hit	2.84925	MUT_vs_Control	enriched hit	MUT_vs_Control_against_WT_vs_Control	enriched no hit	hit x - hit y
MDH2	3.16177	WT_vs_Control	enriched hit	3.17307	MUT_vs_Control	enriched hit	MUT_vs_Control_against_WT_vs_Control	enriched no hit	hit x - hit y
NSA1	3.15303	WT_vs_Control	enriched hit	3.50936	MUT_vs_Control	enriched hit	MUT_vs_Control_against_WT_vs_Control	enriched no hit	hit x - hit y
NOP2	3.01961	WT_vs_Control	enriched hit	2.89919	MUT_vs_Control	enriched hit	MUT_vs_Control_against_WT_vs_Control	enriched no hit	hit x - hit y
RPS31	2.76515	WT_vs_Control	enriched hit	2.21335	MUT_vs_Control	enriched hit	MUT_vs_Control_against_WT_vs_Control	enriched no hit	hit x - hit y
ADE4	2.50475	WT_vs_Control	enriched hit	2.7505	MUT_vs_Control	enriched hit	MUT_vs_Control_against_WT_vs_Control	enriched no hit	hit x - hit y
GDI1	2.69859	WT_vs_Control	enriched hit	1.79262	MUT_vs_Control	enriched hit	MUT_vs_Control_against_WT_vs_Control	enriched candidate	hit x - hit y
TFC4	3.06918	WT_vs_Control	enriched hit	2.64646	MUT_vs_Control	enriched hit	MUT_vs_Control_against_WT_vs_Control	enriched no hit	hit x - hit y
SRP72	3.03483	WT_vs_Control	enriched hit	2.981	MUT_vs_Control	enriched hit	MUT_vs_Control_against_WT_vs_Control	enriched no hit	hit x - hit y
RSC8	2.81304	WT_vs_Control	enriched hit	2.79963	MUT_vs_Control	enriched hit	MUT_vs_Control_against_WT_vs_Control	enriched no hit	hit x - hit y
RPL35A|RPL35B	2.86021	WT_vs_Control	enriched hit	2.91407	MUT_vs_Control	enriched hit	MUT_vs_Control_against_WT_vs_Control	enriched no hit	hit x - hit y
GUS1	2.8389	WT_vs_Control	enriched hit	2.52801	MUT_vs_Control	enriched hit	MUT_vs_Control_against_WT_vs_Control	enriched no hit	hit x - hit y
TIF4631	3.08565	WT_vs_Control	enriched hit	2.21899	MUT_vs_Control	enriched hit	MUT_vs_Control_against_WT_vs_Control	enriched candidate	hit x - hit y
REP1	2.63995	WT_vs_Control	enriched hit	3.07852	MUT_vs_Control	enriched hit	MUT_vs_Control_against_WT_vs_Control	enriched no hit	hit x - hit y
RSP5	2.6912	WT_vs_Control	enriched hit	2.29702	MUT_vs_Control	enriched hit	MUT_vs_Control_against_WT_vs_Control	enriched no hit	hit x - hit y
CKA1	2.90605	WT_vs_Control	enriched hit	3.55009	MUT_vs_Control	enriched hit	MUT_vs_Control_against_WT_vs_Control	enriched candidate	hit x - hit y
RPS15	3.26224	WT_vs_Control	enriched hit	3.71653	MUT_vs_Control	enriched hit	MUT_vs_Control_against_WT_vs_Control	enriched no hit	hit x - hit y
SHM2	2.71917	WT_vs_Control	enriched hit	2.59749	MUT_vs_Control	enriched hit	MUT_vs_Control_against_WT_vs_Control	enriched no hit	hit x - hit y
IES2	2.4173	WT_vs_Control	enriched hit	1.91537	MUT_vs_Control	enriched hit	MUT_vs_Control_against_WT_vs_Control	enriched no hit	hit x - hit y
GCD11	3.13635	WT_vs_Control	enriched hit	3.03855	MUT_vs_Control	enriched hit	MUT_vs_Control_against_WT_vs_Control	enriched no hit	hit x - hit y
MPH1	2.5548	WT_vs_Control	enriched hit	1.74798	MUT_vs_Control	enriched hit	MUT_vs_Control_against_WT_vs_Control	enriched candidate	hit x - hit y
RPS25B|RPS25A	2.79646	WT_vs_Control	enriched hit	3.30718	MUT_vs_Control	enriched hit	MUT_vs_Control_against_WT_vs_Control	enriched no hit	hit x - hit y
RPS3	3.13854	WT_vs_Control	enriched hit	3.04825	MUT_vs_Control	enriched hit	MUT_vs_Control_against_WT_vs_Control	enriched no hit	hit x - hit y
RVB2	2.7995	WT_vs_Control	enriched hit	2.40208	MUT_vs_Control	enriched hit	MUT_vs_Control_against_WT_vs_Control	enriched no hit	hit x - hit y
MRPL22	3.02899	WT_vs_Control	enriched hit	3.44689	MUT_vs_Control	enriched hit	MUT_vs_Control_against_WT_vs_Control	enriched no hit	hit x - hit y
MRPL10	3.06705	WT_vs_Control	enriched hit	2.8891	MUT_vs_Control	enriched hit	MUT_vs_Control_against_WT_vs_Control	enriched no hit	hit x - hit y
TAF5	2.62854	WT_vs_Control	enriched hit	2.47731	MUT_vs_Control	enriched hit	MUT_vs_Control_against_WT_vs_Control	enriched no hit	hit x - hit y
ISW2	2.58735	WT_vs_Control	enriched hit	2.316	MUT_vs_Control	enriched hit	MUT_vs_Control_against_WT_vs_Control	enriched no hit	hit x - hit y
MND1	2.78311	WT_vs_Control	enriched hit	3.05884	MUT_vs_Control	enriched hit	MUT_vs_Control_against_WT_vs_Control	enriched no hit	hit x - hit y
BRX1	2.6858	WT_vs_Control	enriched hit	3.08869	MUT_vs_Control	enriched hit	MUT_vs_Control_against_WT_vs_Control	enriched no hit	hit x - hit y
PCT1	3.37764	WT_vs_Control	enriched hit	2.83352	MUT_vs_Control	enriched hit	MUT_vs_Control_against_WT_vs_Control	enriched no hit	hit x - hit y
SPT5	3.22978	WT_vs_Control	enriched hit	2.39503	MUT_vs_Control	enriched hit	MUT_vs_Control_against_WT_vs_Control	enriched candidate	hit x - hit y
NOP13	2.41064	WT_vs_Control	enriched hit	2.39308	MUT_vs_Control	enriched hit	MUT_vs_Control_against_WT_vs_Control	enriched no hit	hit x - hit y
JHD1	2.59817	WT_vs_Control	enriched hit	2.02878	MUT_vs_Control	enriched hit	MUT_vs_Control_against_WT_vs_Control	enriched no hit	hit x - hit y
NHP6B	4.28071	WT_vs_Control	enriched hit	3.08434	MUT_vs_Control	enriched hit	MUT_vs_Control_against_WT_vs_Control	enriched candidate	hit x - hit y
ICL1	2.59733	WT_vs_Control	enriched hit	2.46839	MUT_vs_Control	enriched hit	MUT_vs_Control_against_WT_vs_Control	enriched no hit	hit x - hit y
MRPL35	2.74664	WT_vs_Control	enriched hit	3.48136	MUT_vs_Control	enriched hit	MUT_vs_Control_against_WT_vs_Control	enriched candidate	hit x - hit y
MST1	3.24518	WT_vs_Control	enriched hit	2.84794	MUT_vs_Control	enriched hit	MUT_vs_Control_against_WT_vs_Control	enriched no hit	hit x - hit y
PDI1	2.97596	WT_vs_Control	enriched hit	2.65633	MUT_vs_Control	enriched hit	MUT_vs_Control_against_WT_vs_Control	enriched no hit	hit x - hit y
SRM1	3.75626	WT_vs_Control	enriched hit	2.70925	MUT_vs_Control	enriched hit	MUT_vs_Control_against_WT_vs_Control	enriched candidate	hit x - hit y
RPL29	3.80929	WT_vs_Control	enriched hit	3.50856	MUT_vs_Control	enriched hit	MUT_vs_Control_against_WT_vs_Control	enriched no hit	hit x - hit y
BDF1	2.57962	WT_vs_Control	enriched hit	2.03911	MUT_vs_Control	enriched hit	MUT_vs_Control_against_WT_vs_Control	enriched no hit	hit x - hit y
HAS1	2.30609	WT_vs_Control	enriched hit	2.63396	MUT_vs_Control	enriched hit	MUT_vs_Control_against_WT_vs_Control	enriched no hit	hit x - hit y
SSE1	2.43583	WT_vs_Control	enriched hit	2.5261	MUT_vs_Control	enriched hit	MUT_vs_Control_against_WT_vs_Control	enriched no hit	hit x - hit y
MGA2	2.51459	WT_vs_Control	enriched hit	1.77715	MUT_vs_Control	enriched hit	MUT_vs_Control_against_WT_vs_Control	enriched candidate	hit x - hit y
SCP160	2.45	WT_vs_Control	enriched hit	1.76995	MUT_vs_Control	enriched hit	MUT_vs_Control_against_WT_vs_Control	enriched candidate	hit x - hit y
RFA1	3.22207	WT_vs_Control	enriched hit	2.16038	MUT_vs_Control	enriched hit	MUT_vs_Control_against_WT_vs_Control	enriched candidate	hit x - hit y
BRN1	2.62849	WT_vs_Control	enriched hit	2.23052	MUT_vs_Control	enriched hit	MUT_vs_Control_against_WT_vs_Control	enriched no hit	hit x - hit y
RPS20	2.70501	WT_vs_Control	enriched hit	2.72674	MUT_vs_Control	enriched hit	MUT_vs_Control_against_WT_vs_Control	enriched no hit	hit x - hit y
NAT10	2.37194	WT_vs_Control	enriched hit	2.2758	MUT_vs_Control	enriched hit	MUT_vs_Control_against_WT_vs_Control	enriched no hit	hit x - hit y
RPN2	2.39124	WT_vs_Control	enriched hit	2.15833	MUT_vs_Control	enriched hit	MUT_vs_Control_against_WT_vs_Control	enriched no hit	hit x - hit y
RPS8A|RPS8B	4.42975	WT_vs_Control	enriched hit	4.77685	MUT_vs_Control	enriched hit	MUT_vs_Control_against_WT_vs_Control	enriched no hit	hit x - hit y
GSP2	5.04241	WT_vs_Control	enriched hit	4.39424	MUT_vs_Control	enriched hit	MUT_vs_Control_against_WT_vs_Control	enriched no hit	hit x - hit y
ADH3	2.83496	WT_vs_Control	enriched hit	2.79648	MUT_vs_Control	enriched hit	MUT_vs_Control_against_WT_vs_Control	enriched no hit	hit x - hit y
TFC1	3.72947	WT_vs_Control	enriched hit	2.9761	MUT_vs_Control	enriched hit	MUT_vs_Control_against_WT_vs_Control	enriched candidate	hit x - hit y
TFC8	3.42208	WT_vs_Control	enriched hit	2.60196	MUT_vs_Control	enriched hit	MUT_vs_Control_against_WT_vs_Control	enriched candidate	hit x - hit y
RLI1	2.61096	WT_vs_Control	enriched hit	2.54052	MUT_vs_Control	enriched hit	MUT_vs_Control_against_WT_vs_Control	enriched no hit	hit x - hit y
DOT5	2.64954	WT_vs_Control	enriched hit	2.65091	MUT_vs_Control	enriched hit	MUT_vs_Control_against_WT_vs_Control	enriched no hit	hit x - hit y
RPA135	2.58764	WT_vs_Control	enriched hit	2.56954	MUT_vs_Control	enriched hit	MUT_vs_Control_against_WT_vs_Control	enriched no hit	hit x - hit y
REB1	4.37432	WT_vs_Control	enriched hit	3.15291	MUT_vs_Control	enriched hit	MUT_vs_Control_against_WT_vs_Control	enriched candidate	hit x - hit y
HOM6	3.30575	WT_vs_Control	enriched hit	2.8712	MUT_vs_Control	enriched hit	MUT_vs_Control_against_WT_vs_Control	enriched no hit	hit x - hit y
PDE2	2.92454	WT_vs_Control	enriched hit	2.41339	MUT_vs_Control	enriched hit	MUT_vs_Control_against_WT_vs_Control	enriched no hit	hit x - hit y
PUF3	3.32009	WT_vs_Control	enriched hit	3.31939	MUT_vs_Control	enriched hit	MUT_vs_Control_against_WT_vs_Control	enriched no hit	hit x - hit y
CCT8	2.59757	WT_vs_Control	enriched hit	2.66977	MUT_vs_Control	enriched hit	MUT_vs_Control_against_WT_vs_Control	enriched no hit	hit x - hit y
SHS1	2.53398	WT_vs_Control	enriched hit	2.13483	MUT_vs_Control	enriched hit	MUT_vs_Control_against_WT_vs_Control	enriched no hit	hit x - hit y
ACS1	2.3129	WT_vs_Control	enriched hit	2.683	MUT_vs_Control	enriched hit	MUT_vs_Control_against_WT_vs_Control	enriched no hit	hit x - hit y
WRS1	3.49345	WT_vs_Control	enriched hit	2.60821	MUT_vs_Control	enriched hit	MUT_vs_Control_against_WT_vs_Control	enriched candidate	hit x - hit y
VPS5	2.4167	WT_vs_Control	enriched hit	2.41804	MUT_vs_Control	enriched hit	MUT_vs_Control_against_WT_vs_Control	enriched no hit	hit x - hit y
IST2	2.41081	WT_vs_Control	enriched hit	2.44218	MUT_vs_Control	enriched hit	MUT_vs_Control_against_WT_vs_Control	enriched no hit	hit x - hit y
MET17	2.64309	WT_vs_Control	enriched hit	2.67662	MUT_vs_Control	enriched hit	MUT_vs_Control_against_WT_vs_Control	enriched no hit	hit x - hit y
TFC3	2.69474	WT_vs_Control	enriched hit	2.05217	MUT_vs_Control	enriched hit	MUT_vs_Control_against_WT_vs_Control	enriched candidate	hit x - hit y
GET4	3.03164	WT_vs_Control	enriched hit	3.1974	MUT_vs_Control	enriched hit	MUT_vs_Control_against_WT_vs_Control	enriched no hit	hit x - hit y
SEC24	3.02722	WT_vs_Control	enriched hit	2.59025	MUT_vs_Control	enriched hit	MUT_vs_Control_against_WT_vs_Control	enriched no hit	hit x - hit y
GTS1	2.45263	WT_vs_Control	enriched hit	2.07376	MUT_vs_Control	enriched hit	MUT_vs_Control_against_WT_vs_Control	enriched no hit	hit x - hit y
SUB1	3.70881	WT_vs_Control	enriched hit	2.29658	MUT_vs_Control	enriched hit	MUT_vs_Control_against_WT_vs_Control	enriched hit	hit x - hit y
RSC2	3.09042	WT_vs_Control	enriched hit	2.85337	MUT_vs_Control	enriched hit	MUT_vs_Control_against_WT_vs_Control	enriched no hit	hit x - hit y
SCS2	2.23883	WT_vs_Control	enriched hit	2.2084	MUT_vs_Control	enriched hit	MUT_vs_Control_against_WT_vs_Control	enriched no hit	hit x - hit y
HRR25	2.57802	WT_vs_Control	enriched hit	2.86425	MUT_vs_Control	enriched hit	MUT_vs_Control_against_WT_vs_Control	enriched no hit	hit x - hit y
ADE13	2.41572	WT_vs_Control	enriched hit	2.34682	MUT_vs_Control	enriched hit	MUT_vs_Control_against_WT_vs_Control	enriched no hit	hit x - hit y
RPG1	2.26242	WT_vs_Control	enriched hit	2.22965	MUT_vs_Control	enriched hit	MUT_vs_Control_against_WT_vs_Control	enriched no hit	hit x - hit y
YNL181W	2.30704	WT_vs_Control	enriched hit	1.98587	MUT_vs_Control	enriched hit	MUT_vs_Control_against_WT_vs_Control	enriched no hit	hit x - hit y
MRPL17	2.39599	WT_vs_Control	enriched hit	3.03088	MUT_vs_Control	enriched hit	MUT_vs_Control_against_WT_vs_Control	enriched candidate	hit x - hit y
ALD4	2.87467	WT_vs_Control	enriched hit	3.19008	MUT_vs_Control	enriched hit	MUT_vs_Control_against_WT_vs_Control	enriched no hit	hit x - hit y
DBP2	2.31243	WT_vs_Control	enriched hit	2.28799	MUT_vs_Control	enriched hit	MUT_vs_Control_against_WT_vs_Control	enriched no hit	hit x - hit y
SAS3	4.59884	WT_vs_Control	enriched hit	2.90897	MUT_vs_Control	enriched hit	MUT_vs_Control_against_WT_vs_Control	enriched hit	hit x - hit y
ABF1	2.46053	WT_vs_Control	enriched hit	2.14079	MUT_vs_Control	enriched hit	MUT_vs_Control_against_WT_vs_Control	enriched no hit	hit x - hit y
HSC82	2.32335	WT_vs_Control	enriched hit	2.52186	MUT_vs_Control	enriched hit	MUT_vs_Control_against_WT_vs_Control	enriched no hit	hit x - hit y
UBP3	3.09532	WT_vs_Control	enriched hit	2.76834	MUT_vs_Control	enriched hit	MUT_vs_Control_against_WT_vs_Control	enriched no hit	hit x - hit y
MLH1	2.6858	WT_vs_Control	enriched hit	2.38747	MUT_vs_Control	enriched hit	MUT_vs_Control_against_WT_vs_Control	enriched no hit	hit x - hit y
AGX1	2.33012	WT_vs_Control	enriched hit	2.34254	MUT_vs_Control	enriched hit	MUT_vs_Control_against_WT_vs_Control	enriched no hit	hit x - hit y
HTB2	5.15046	WT_vs_Control	enriched hit	3.14876	MUT_vs_Control	enriched hit	MUT_vs_Control_against_WT_vs_Control	enriched hit	hit x - hit y
PYC1	2.21152	WT_vs_Control	enriched hit	2.19295	MUT_vs_Control	enriched hit	MUT_vs_Control_against_WT_vs_Control	enriched no hit	hit x - hit y
FUN12	3.02343	WT_vs_Control	enriched hit	2.35998	MUT_vs_Control	enriched hit	MUT_vs_Control_against_WT_vs_Control	enriched candidate	hit x - hit y
TMA64	2.34705	WT_vs_Control	enriched hit	2.01449	MUT_vs_Control	enriched hit	MUT_vs_Control_against_WT_vs_Control	enriched no hit	hit x - hit y
ALA1	2.35412	WT_vs_Control	enriched hit	2.0067	MUT_vs_Control	enriched hit	MUT_vs_Control_against_WT_vs_Control	enriched no hit	hit x - hit y
PFK1	2.48943	WT_vs_Control	enriched hit	2.76773	MUT_vs_Control	enriched hit	MUT_vs_Control_against_WT_vs_Control	enriched no hit	hit x - hit y
LSC1	2.21571	WT_vs_Control	enriched hit	2.01368	MUT_vs_Control	enriched hit	MUT_vs_Control_against_WT_vs_Control	enriched no hit	hit x - hit y
RPB2	3.47918	WT_vs_Control	enriched hit	2.17249	MUT_vs_Control	enriched hit	MUT_vs_Control_against_WT_vs_Control	enriched hit	hit x - hit y
ADE2	2.60087	WT_vs_Control	enriched hit	2.81738	MUT_vs_Control	enriched hit	MUT_vs_Control_against_WT_vs_Control	enriched no hit	hit x - hit y
DHH1	3.06117	WT_vs_Control	enriched hit	2.78592	MUT_vs_Control	enriched hit	MUT_vs_Control_against_WT_vs_Control	enriched no hit	hit x - hit y
PGM2	2.21291	WT_vs_Control	enriched hit	2.3266	MUT_vs_Control	enriched hit	MUT_vs_Control_against_WT_vs_Control	enriched no hit	hit x - hit y
RPB8	3.61824	WT_vs_Control	enriched hit	2.54902	MUT_vs_Control	enriched hit	MUT_vs_Control_against_WT_vs_Control	enriched candidate	hit x - hit y
LSB3	4.31214	WT_vs_Control	enriched hit	3.49604	MUT_vs_Control	enriched hit	MUT_vs_Control_against_WT_vs_Control	enriched no hit	hit x - hit y
RPS30A|RPS30B	3.10025	WT_vs_Control	enriched hit	2.31393	MUT_vs_Control	enriched hit	MUT_vs_Control_against_WT_vs_Control	enriched candidate	hit x - hit y
ACC1	2.52897	WT_vs_Control	enriched hit	2.23994	MUT_vs_Control	enriched hit	MUT_vs_Control_against_WT_vs_Control	enriched no hit	hit x - hit y
RPB3	3.40228	WT_vs_Control	enriched hit	1.87206	MUT_vs_Control	enriched hit	MUT_vs_Control_against_WT_vs_Control	enriched hit	hit x - hit y
SEC23	2.22255	WT_vs_Control	enriched hit	1.89681	MUT_vs_Control	enriched hit	MUT_vs_Control_against_WT_vs_Control	enriched no hit	hit x - hit y
SMC4	2.17501	WT_vs_Control	enriched hit	1.88501	MUT_vs_Control	enriched hit	MUT_vs_Control_against_WT_vs_Control	enriched no hit	hit x - hit y
FRA1	2.25344	WT_vs_Control	enriched hit	1.99767	MUT_vs_Control	enriched hit	MUT_vs_Control_against_WT_vs_Control	enriched no hit	hit x - hit y
ETR1	2.29604	WT_vs_Control	enriched hit	2.52121	MUT_vs_Control	enriched hit	MUT_vs_Control_against_WT_vs_Control	enriched no hit	hit x - hit y
YHR097C	2.59102	WT_vs_Control	enriched hit	3.52629	MUT_vs_Control	enriched hit	MUT_vs_Control_against_WT_vs_Control	enriched candidate	hit x - hit y
OLA1	2.27849	WT_vs_Control	enriched hit	1.75507	MUT_vs_Control	enriched hit	MUT_vs_Control_against_WT_vs_Control	enriched no hit	hit x - hit y
KGD2	2.5946	WT_vs_Control	enriched hit	3.02718	MUT_vs_Control	enriched hit	MUT_vs_Control_against_WT_vs_Control	enriched no hit	hit x - hit y
YNG1	4.16249	WT_vs_Control	enriched hit	2.77561	MUT_vs_Control	enriched hit	MUT_vs_Control_against_WT_vs_Control	enriched candidate	hit x - hit y
DPS1	2.93503	WT_vs_Control	enriched hit	2.39509	MUT_vs_Control	enriched hit	MUT_vs_Control_against_WT_vs_Control	enriched no hit	hit x - hit y
NOG1	2.44342	WT_vs_Control	enriched hit	2.86614	MUT_vs_Control	enriched hit	MUT_vs_Control_against_WT_vs_Control	enriched no hit	hit x - hit y
VPS33	2.38214	WT_vs_Control	enriched hit	2.48925	MUT_vs_Control	enriched hit	MUT_vs_Control_against_WT_vs_Control	enriched no hit	hit x - hit y
VMA2	2.69255	WT_vs_Control	enriched hit	2.92892	MUT_vs_Control	enriched hit	MUT_vs_Control_against_WT_vs_Control	enriched no hit	hit x - hit y
KNS1	2.28382	WT_vs_Control	enriched hit	2.36193	MUT_vs_Control	enriched hit	MUT_vs_Control_against_WT_vs_Control	enriched no hit	hit x - hit y
RPS11A|RPS11B	2.69436	WT_vs_Control	enriched hit	3.43431	MUT_vs_Control	enriched hit	MUT_vs_Control_against_WT_vs_Control	enriched candidate	hit x - hit y
HOP1	3.49517	WT_vs_Control	enriched hit	3.97446	MUT_vs_Control	enriched hit	MUT_vs_Control_against_WT_vs_Control	enriched no hit	hit x - hit y
YEL020C	2.66384	WT_vs_Control	enriched hit	2.82336	MUT_vs_Control	enriched hit	MUT_vs_Control_against_WT_vs_Control	enriched no hit	hit x - hit y
MSH6	4.05506	WT_vs_Control	enriched hit	3.06925	MUT_vs_Control	enriched hit	MUT_vs_Control_against_WT_vs_Control	enriched candidate	hit x - hit y
MSH1	2.90767	WT_vs_Control	enriched hit	2.39733	MUT_vs_Control	enriched hit	MUT_vs_Control_against_WT_vs_Control	enriched no hit	hit x - hit y
TYS1	2.63836	WT_vs_Control	enriched hit	2.64385	MUT_vs_Control	enriched hit	MUT_vs_Control_against_WT_vs_Control	enriched no hit	hit x - hit y
FUM1	2.29275	WT_vs_Control	enriched hit	2.47679	MUT_vs_Control	enriched hit	MUT_vs_Control_against_WT_vs_Control	enriched no hit	hit x - hit y
YCS4	3.04941	WT_vs_Control	enriched hit	2.47931	MUT_vs_Control	enriched hit	MUT_vs_Control_against_WT_vs_Control	enriched no hit	hit x - hit y
PRP43	2.96866	WT_vs_Control	enriched hit	3.04688	MUT_vs_Control	enriched hit	MUT_vs_Control_against_WT_vs_Control	enriched no hit	hit x - hit y
NHP2	3.18187	WT_vs_Control	enriched hit	2.47518	MUT_vs_Control	enriched hit	MUT_vs_Control_against_WT_vs_Control	enriched candidate	hit x - hit y
MLS1	2.06346	WT_vs_Control	enriched hit	2.37312	MUT_vs_Control	enriched hit	MUT_vs_Control_against_WT_vs_Control	enriched no hit	hit x - hit y
LSC2	2.17066	WT_vs_Control	enriched hit	2.1813	MUT_vs_Control	enriched hit	MUT_vs_Control_against_WT_vs_Control	enriched no hit	hit x - hit y
CMR1	4.59281	WT_vs_Control	enriched hit	3.26652	MUT_vs_Control	enriched hit	MUT_vs_Control_against_WT_vs_Control	enriched candidate	hit x - hit y
SPF1	2.34732	WT_vs_Control	enriched hit	1.88571	MUT_vs_Control	enriched hit	MUT_vs_Control_against_WT_vs_Control	enriched no hit	hit x - hit y
YCG1	2.45007	WT_vs_Control	enriched hit	1.95158	MUT_vs_Control	enriched hit	MUT_vs_Control_against_WT_vs_Control	enriched no hit	hit x - hit y
NOP56	2.83065	WT_vs_Control	enriched hit	2.43471	MUT_vs_Control	enriched hit	MUT_vs_Control_against_WT_vs_Control	enriched no hit	hit x - hit y
RPO21	4.17885	WT_vs_Control	enriched hit	2.6594	MUT_vs_Control	enriched hit	MUT_vs_Control_against_WT_vs_Control	enriched candidate	hit x - hit y
MRPS28	3.28813	WT_vs_Control	enriched hit	2.7314	MUT_vs_Control	enriched hit	MUT_vs_Control_against_WT_vs_Control	enriched no hit	hit x - hit y
SWC3	3.39577	WT_vs_Control	enriched hit	2.49345	MUT_vs_Control	enriched hit	MUT_vs_Control_against_WT_vs_Control	enriched candidate	hit x - hit y
IOC2	3.47017	WT_vs_Control	enriched hit	2.53356	MUT_vs_Control	enriched hit	MUT_vs_Control_against_WT_vs_Control	enriched candidate	hit x - hit y
MSS116	3.39096	WT_vs_Control	enriched hit	2.90117	MUT_vs_Control	enriched hit	MUT_vs_Control_against_WT_vs_Control	enriched no hit	hit x - hit y
BRE1	2.34244	WT_vs_Control	enriched hit	2.41417	MUT_vs_Control	enriched hit	MUT_vs_Control_against_WT_vs_Control	enriched no hit	hit x - hit y
RPL1A|RPL1B	3.89367	WT_vs_Control	enriched hit	4.94063	MUT_vs_Control	enriched hit	MUT_vs_Control_against_WT_vs_Control	enriched candidate	hit x - hit y
CAM1	2.29287	WT_vs_Control	enriched hit	1.9776	MUT_vs_Control	enriched hit	MUT_vs_Control_against_WT_vs_Control	enriched no hit	hit x - hit y
RPT6	2.19546	WT_vs_Control	enriched hit	2.42014	MUT_vs_Control	enriched hit	MUT_vs_Control_against_WT_vs_Control	enriched no hit	hit x - hit y
RRN5	2.56696	WT_vs_Control	enriched hit	2.41084	MUT_vs_Control	enriched hit	MUT_vs_Control_against_WT_vs_Control	enriched no hit	hit x - hit y
LAP3	2.5928	WT_vs_Control	enriched hit	2.56882	MUT_vs_Control	enriched hit	MUT_vs_Control_against_WT_vs_Control	enriched no hit	hit x - hit y
MRPS35	2.07422	WT_vs_Control	enriched hit	2.30832	MUT_vs_Control	enriched hit	MUT_vs_Control_against_WT_vs_Control	enriched no hit	hit x - hit y
GLO3	2.73493	WT_vs_Control	enriched hit	2.41324	MUT_vs_Control	enriched hit	MUT_vs_Control_against_WT_vs_Control	enriched no hit	hit x - hit y
RTT106	5.87888	WT_vs_Control	enriched hit	3.90036	MUT_vs_Control	enriched hit	MUT_vs_Control_against_WT_vs_Control	enriched candidate	hit x - hit y
RPL9B	2.78793	WT_vs_Control	enriched hit	3.00876	MUT_vs_Control	enriched hit	MUT_vs_Control_against_WT_vs_Control	enriched no hit	hit x - hit y
HOS3	2.51332	WT_vs_Control	enriched hit	1.9162	MUT_vs_Control	enriched hit	MUT_vs_Control_against_WT_vs_Control	enriched candidate	hit x - hit y
WTM1	2.0455	WT_vs_Control	enriched hit	3.00157	MUT_vs_Control	enriched hit	MUT_vs_Control_against_WT_vs_Control	enriched candidate	hit x - hit y
SPT15	3.27223	WT_vs_Control	enriched hit	2.14187	MUT_vs_Control	enriched hit	MUT_vs_Control_against_WT_vs_Control	enriched candidate	hit x - hit y
UME6	3.23124	WT_vs_Control	enriched hit	2.26921	MUT_vs_Control	enriched hit	MUT_vs_Control_against_WT_vs_Control	enriched candidate	hit x - hit y
RPT4	2.26857	WT_vs_Control	enriched hit	2.5076	MUT_vs_Control	enriched hit	MUT_vs_Control_against_WT_vs_Control	enriched no hit	hit x - hit y
VPS1	2.53599	WT_vs_Control	enriched hit	2.4111	MUT_vs_Control	enriched hit	MUT_vs_Control_against_WT_vs_Control	enriched no hit	hit x - hit y
TAL1	2.43335	WT_vs_Control	enriched hit	2.2442	MUT_vs_Control	enriched hit	MUT_vs_Control_against_WT_vs_Control	enriched no hit	hit x - hit y
SKO1	4.77195	WT_vs_Control	enriched hit	3.2763	MUT_vs_Control	enriched hit	MUT_vs_Control_against_WT_vs_Control	enriched candidate	hit x - hit y
ACT1	2.32078	WT_vs_Control	enriched hit	2.42101	MUT_vs_Control	enriched hit	MUT_vs_Control_against_WT_vs_Control	enriched no hit	hit x - hit y
HHO1	4.73041	WT_vs_Control	enriched hit	3.62204	MUT_vs_Control	enriched hit	MUT_vs_Control_against_WT_vs_Control	enriched candidate	hit x - hit y
ADE6	2.29448	WT_vs_Control	enriched hit	2.41752	MUT_vs_Control	enriched hit	MUT_vs_Control_against_WT_vs_Control	enriched no hit	hit x - hit y
EBP2	2.78467	WT_vs_Control	enriched hit	2.91053	MUT_vs_Control	enriched hit	MUT_vs_Control_against_WT_vs_Control	enriched no hit	hit x - hit y
LAT1	2.52488	WT_vs_Control	enriched hit	2.5515	MUT_vs_Control	enriched hit	MUT_vs_Control_against_WT_vs_Control	enriched no hit	hit x - hit y
PAT1	3.0166	WT_vs_Control	enriched hit	2.89683	MUT_vs_Control	enriched hit	MUT_vs_Control_against_WT_vs_Control	enriched no hit	hit x - hit y
MIR1	2.86637	WT_vs_Control	enriched hit	3.39561	MUT_vs_Control	enriched hit	MUT_vs_Control_against_WT_vs_Control	enriched no hit	hit x - hit y
TEF1	2.14503	WT_vs_Control	enriched hit	2.19433	MUT_vs_Control	enriched hit	MUT_vs_Control_against_WT_vs_Control	enriched no hit	hit x - hit y
HTZ1	2.63337	WT_vs_Control	enriched hit	1.25451	MUT_vs_Control	enriched hit	MUT_vs_Control_against_WT_vs_Control	enriched hit	hit x - hit y
LSM12	2.31877	WT_vs_Control	enriched hit	1.74738	MUT_vs_Control	enriched hit	MUT_vs_Control_against_WT_vs_Control	enriched no hit	hit x - hit y
APL2	2.99285	WT_vs_Control	enriched hit	2.58912	MUT_vs_Control	enriched hit	MUT_vs_Control_against_WT_vs_Control	enriched no hit	hit x - hit y
MRPL24	2.50558	WT_vs_Control	enriched hit	2.53414	MUT_vs_Control	enriched hit	MUT_vs_Control_against_WT_vs_Control	enriched no hit	hit x - hit y
EFT1	2.23855	WT_vs_Control	enriched hit	2.38884	MUT_vs_Control	enriched hit	MUT_vs_Control_against_WT_vs_Control	enriched no hit	hit x - hit y
TMA19	2.18243	WT_vs_Control	enriched hit	2.54207	MUT_vs_Control	enriched hit	MUT_vs_Control_against_WT_vs_Control	enriched no hit	hit x - hit y
RSM24	3.44197	WT_vs_Control	enriched hit	4.41954	MUT_vs_Control	enriched hit	MUT_vs_Control_against_WT_vs_Control	enriched candidate	hit x - hit y
FOX2	3.80375	WT_vs_Control	enriched hit	3.94178	MUT_vs_Control	enriched hit	MUT_vs_Control_against_WT_vs_Control	enriched no hit	hit x - hit y
PDA1	2.66787	WT_vs_Control	enriched hit	2.76548	MUT_vs_Control	enriched hit	MUT_vs_Control_against_WT_vs_Control	enriched no hit	hit x - hit y
LOC1	3.70623	WT_vs_Control	enriched hit	2.99835	MUT_vs_Control	enriched hit	MUT_vs_Control_against_WT_vs_Control	enriched no hit	hit x - hit y
SES1	3.16088	WT_vs_Control	enriched hit	2.44447	MUT_vs_Control	enriched hit	MUT_vs_Control_against_WT_vs_Control	enriched candidate	hit x - hit y
HIR2	3.67513	WT_vs_Control	enriched hit	2.53212	MUT_vs_Control	enriched hit	MUT_vs_Control_against_WT_vs_Control	enriched candidate	hit x - hit y
NOC2	2.14803	WT_vs_Control	enriched hit	2.44599	MUT_vs_Control	enriched hit	MUT_vs_Control_against_WT_vs_Control	enriched no hit	hit x - hit y
SAH1	2.77762	WT_vs_Control	enriched hit	2.46694	MUT_vs_Control	enriched hit	MUT_vs_Control_against_WT_vs_Control	enriched no hit	hit x - hit y
RPB5	3.58633	WT_vs_Control	enriched hit	2.52165	MUT_vs_Control	enriched hit	MUT_vs_Control_against_WT_vs_Control	enriched candidate	hit x - hit y
TSL1	2.29748	WT_vs_Control	enriched hit	2.31072	MUT_vs_Control	enriched hit	MUT_vs_Control_against_WT_vs_Control	enriched no hit	hit x - hit y
SEC61	2.73283	WT_vs_Control	enriched hit	2.52972	MUT_vs_Control	enriched hit	MUT_vs_Control_against_WT_vs_Control	enriched no hit	hit x - hit y
GDH2	2.32482	WT_vs_Control	enriched hit	2.4376	MUT_vs_Control	enriched hit	MUT_vs_Control_against_WT_vs_Control	enriched no hit	hit x - hit y
APN1	2.69711	WT_vs_Control	enriched hit	2.00763	MUT_vs_Control	enriched hit	MUT_vs_Control_against_WT_vs_Control	enriched candidate	hit x - hit y
EDE1	2.5042	WT_vs_Control	enriched hit	1.39326	MUT_vs_Control	enriched hit	MUT_vs_Control_against_WT_vs_Control	enriched hit	hit x - hit y
RPL5	2.058	WT_vs_Control	enriched hit	2.07663	MUT_vs_Control	enriched hit	MUT_vs_Control_against_WT_vs_Control	enriched no hit	hit x - hit y
XDJ1	2.23958	WT_vs_Control	enriched hit	2.83743	MUT_vs_Control	enriched hit	MUT_vs_Control_against_WT_vs_Control	enriched candidate	hit x - hit y
PET9	2.51608	WT_vs_Control	enriched hit	2.94078	MUT_vs_Control	enriched hit	MUT_vs_Control_against_WT_vs_Control	enriched no hit	hit x - hit y
PHO2	2.72139	WT_vs_Control	enriched hit	2.53656	MUT_vs_Control	enriched hit	MUT_vs_Control_against_WT_vs_Control	enriched no hit	hit x - hit y
TOP2	3.02512	WT_vs_Control	enriched hit	2.60676	MUT_vs_Control	enriched hit	MUT_vs_Control_against_WT_vs_Control	enriched no hit	hit x - hit y
RPL25	2.30673	WT_vs_Control	enriched hit	2.91568	MUT_vs_Control	enriched hit	MUT_vs_Control_against_WT_vs_Control	enriched candidate	hit x - hit y
FRS2	2.78313	WT_vs_Control	enriched hit	1.83501	MUT_vs_Control	enriched hit	MUT_vs_Control_against_WT_vs_Control	enriched candidate	hit x - hit y
SPS19	2.91739	WT_vs_Control	enriched hit	2.87711	MUT_vs_Control	enriched hit	MUT_vs_Control_against_WT_vs_Control	enriched no hit	hit x - hit y
YAT1	3.10164	WT_vs_Control	enriched hit	3.06943	MUT_vs_Control	enriched hit	MUT_vs_Control_against_WT_vs_Control	enriched no hit	hit x - hit y
YGL108C	2.4512	WT_vs_Control	enriched hit	2.31324	MUT_vs_Control	enriched hit	MUT_vs_Control_against_WT_vs_Control	enriched no hit	hit x - hit y
AMS1	2.0909	WT_vs_Control	enriched hit	2.24161	MUT_vs_Control	enriched hit	MUT_vs_Control_against_WT_vs_Control	enriched no hit	hit x - hit y
HSV2	2.06814	WT_vs_Control	enriched hit	1.43037	MUT_vs_Control	enriched hit	MUT_vs_Control_against_WT_vs_Control	enriched candidate	hit x - hit y
MCM3	2.61616	WT_vs_Control	enriched hit	1.54487	MUT_vs_Control	enriched hit	MUT_vs_Control_against_WT_vs_Control	enriched candidate	hit x - hit y
TIF35	2.16913	WT_vs_Control	enriched hit	2.22551	MUT_vs_Control	enriched hit	MUT_vs_Control_against_WT_vs_Control	enriched no hit	hit x - hit y
CFT2	1.90118	WT_vs_Control	enriched hit	1.69887	MUT_vs_Control	enriched hit	MUT_vs_Control_against_WT_vs_Control	enriched no hit	hit x - hit y
NGG1	2.60938	WT_vs_Control	enriched hit	2.46127	MUT_vs_Control	enriched hit	MUT_vs_Control_against_WT_vs_Control	enriched no hit	hit x - hit y
HSP104	2.05796	WT_vs_Control	enriched hit	1.82667	MUT_vs_Control	enriched hit	MUT_vs_Control_against_WT_vs_Control	enriched no hit	hit x - hit y
POL30	2.28659	WT_vs_Control	enriched hit	2.88608	MUT_vs_Control	enriched hit	MUT_vs_Control_against_WT_vs_Control	enriched candidate	hit x - hit y
HTB1	5.2202	WT_vs_Control	enriched hit	3.05361	MUT_vs_Control	enriched hit	MUT_vs_Control_against_WT_vs_Control	enriched candidate	hit x - hit y
HHF1	3.62414	WT_vs_Control	enriched hit	1.86228	MUT_vs_Control	enriched hit	MUT_vs_Control_against_WT_vs_Control	enriched hit	hit x - hit y
SEG1	2.30965	WT_vs_Control	enriched hit	2.42625	MUT_vs_Control	enriched hit	MUT_vs_Control_against_WT_vs_Control	enriched no hit	hit x - hit y
BDP1	4.52585	WT_vs_Control	enriched hit	3.02976	MUT_vs_Control	enriched hit	MUT_vs_Control_against_WT_vs_Control	enriched candidate	hit x - hit y
ERG20	2.36025	WT_vs_Control	enriched hit	2.17292	MUT_vs_Control	enriched hit	MUT_vs_Control_against_WT_vs_Control	enriched no hit	hit x - hit y
DBP5	3.80927	WT_vs_Control	enriched hit	2.71973	MUT_vs_Control	enriched hit	MUT_vs_Control_against_WT_vs_Control	enriched candidate	hit x - hit y
GRS1	2.13791	WT_vs_Control	enriched hit	2.07003	MUT_vs_Control	enriched hit	MUT_vs_Control_against_WT_vs_Control	enriched no hit	hit x - hit y
BBC1	2.5249	WT_vs_Control	enriched hit	2.96872	MUT_vs_Control	enriched hit	MUT_vs_Control_against_WT_vs_Control	enriched no hit	hit x - hit y
EAF3	2.38388	WT_vs_Control	enriched hit	2.47367	MUT_vs_Control	enriched hit	MUT_vs_Control_against_WT_vs_Control	enriched no hit	hit x - hit y
RSF1	3.77935	WT_vs_Control	enriched hit	2.69611	MUT_vs_Control	enriched hit	MUT_vs_Control_against_WT_vs_Control	enriched candidate	hit x - hit y
PDC1	2.69915	WT_vs_Control	enriched hit	3.24281	MUT_vs_Control	enriched hit	MUT_vs_Control_against_WT_vs_Control	enriched no hit	hit x - hit y
RAD16	2.35239	WT_vs_Control	enriched hit	1.64089	MUT_vs_Control	enriched hit	MUT_vs_Control_against_WT_vs_Control	enriched candidate	hit x - hit y
SPB4	2.50208	WT_vs_Control	enriched hit	2.62815	MUT_vs_Control	enriched hit	MUT_vs_Control_against_WT_vs_Control	enriched no hit	hit x - hit y
MRPS9	2.66204	WT_vs_Control	enriched hit	2.94765	MUT_vs_Control	enriched hit	MUT_vs_Control_against_WT_vs_Control	enriched no hit	hit x - hit y
RTS2	2.50629	WT_vs_Control	enriched hit	2.07179	MUT_vs_Control	enriched hit	MUT_vs_Control_against_WT_vs_Control	enriched no hit	hit x - hit y
OSM1	2.18899	WT_vs_Control	enriched hit	2.24497	MUT_vs_Control	enriched hit	MUT_vs_Control_against_WT_vs_Control	enriched no hit	hit x - hit y
TMA7	2.32697	WT_vs_Control	enriched hit	2.50194	MUT_vs_Control	enriched hit	MUT_vs_Control_against_WT_vs_Control	enriched no hit	hit x - hit y
OAF1	2.05173	WT_vs_Control	enriched hit	1.838	MUT_vs_Control	enriched hit	MUT_vs_Control_against_WT_vs_Control	enriched no hit	hit x - hit y
KAP95	2.54094	WT_vs_Control	enriched hit	3.41703	MUT_vs_Control	enriched hit	MUT_vs_Control_against_WT_vs_Control	enriched candidate	hit x - hit y
NUP145	2.06514	WT_vs_Control	enriched hit	1.96548	MUT_vs_Control	enriched hit	MUT_vs_Control_against_WT_vs_Control	enriched no hit	hit x - hit y
YER079W	1.91261	WT_vs_Control	enriched hit	2.07688	MUT_vs_Control	enriched hit	MUT_vs_Control_against_WT_vs_Control	enriched no hit	hit x - hit y
MDG1	2.77436	WT_vs_Control	enriched hit	2.39008	MUT_vs_Control	enriched hit	MUT_vs_Control_against_WT_vs_Control	enriched no hit	hit x - hit y
CDC3	2.5408	WT_vs_Control	enriched hit	1.89528	MUT_vs_Control	enriched hit	MUT_vs_Control_against_WT_vs_Control	enriched candidate	hit x - hit y
GAR1	2.53745	WT_vs_Control	enriched hit	2.23747	MUT_vs_Control	enriched hit	MUT_vs_Control_against_WT_vs_Control	enriched no hit	hit x - hit y
CDC12	2.6186	WT_vs_Control	enriched hit	2.37965	MUT_vs_Control	enriched hit	MUT_vs_Control_against_WT_vs_Control	enriched no hit	hit x - hit y
ERV29	3.09893	WT_vs_Control	enriched hit	2.5176	MUT_vs_Control	enriched hit	MUT_vs_Control_against_WT_vs_Control	enriched no hit	hit x - hit y
IFM1	1.94464	WT_vs_Control	enriched hit	1.79034	MUT_vs_Control	enriched hit	MUT_vs_Control_against_WT_vs_Control	enriched no hit	hit x - hit y
SMC2	2.81133	WT_vs_Control	enriched hit	2.45979	MUT_vs_Control	enriched hit	MUT_vs_Control_against_WT_vs_Control	enriched no hit	hit x - hit y
PMT1	2.2246	WT_vs_Control	enriched hit	2.11252	MUT_vs_Control	enriched hit	MUT_vs_Control_against_WT_vs_Control	enriched no hit	hit x - hit y
YGR169C-A	3.3348	WT_vs_Control	enriched hit	3.37209	MUT_vs_Control	enriched hit	MUT_vs_Control_against_WT_vs_Control	enriched no hit	hit x - hit y
TRA1	3.20335	WT_vs_Control	enriched hit	2.74941	MUT_vs_Control	enriched hit	MUT_vs_Control_against_WT_vs_Control	enriched no hit	hit x - hit y
RPL20A|RPL20B	2.35849	WT_vs_Control	enriched hit	2.97438	MUT_vs_Control	enriched hit	MUT_vs_Control_against_WT_vs_Control	enriched candidate	hit x - hit y
YDR341C	2.29241	WT_vs_Control	enriched hit	1.87349	MUT_vs_Control	enriched hit	MUT_vs_Control_against_WT_vs_Control	enriched no hit	hit x - hit y
RPL15A	3.98903	WT_vs_Control	enriched hit	4.4603	MUT_vs_Control	enriched hit	MUT_vs_Control_against_WT_vs_Control	enriched no hit	hit x - hit y
CBF5	3.70665	WT_vs_Control	enriched hit	3.14744	MUT_vs_Control	enriched hit	MUT_vs_Control_against_WT_vs_Control	enriched no hit	hit x - hit y
APE2	2.84237	WT_vs_Control	enriched hit	2.82965	MUT_vs_Control	enriched hit	MUT_vs_Control_against_WT_vs_Control	enriched no hit	hit x - hit y
NOP16	2.10925	WT_vs_Control	enriched hit	2.5917	MUT_vs_Control	enriched hit	MUT_vs_Control_against_WT_vs_Control	enriched no hit	hit x - hit y
REP2	2.67677	WT_vs_Control	enriched hit	1.9228	MUT_vs_Control	enriched hit	MUT_vs_Control_against_WT_vs_Control	enriched candidate	hit x - hit y
SEC26	1.95196	WT_vs_Control	enriched hit	2.03292	MUT_vs_Control	enriched hit	MUT_vs_Control_against_WT_vs_Control	enriched no hit	hit x - hit y
MKT1	2.19419	WT_vs_Control	enriched hit	1.78184	MUT_vs_Control	enriched hit	MUT_vs_Control_against_WT_vs_Control	enriched no hit	hit x - hit y
ARE2	1.98118	WT_vs_Control	enriched hit	2.02322	MUT_vs_Control	enriched hit	MUT_vs_Control_against_WT_vs_Control	enriched no hit	hit x - hit y
RFC3	2.35313	WT_vs_Control	enriched hit	2.47269	MUT_vs_Control	enriched hit	MUT_vs_Control_against_WT_vs_Control	enriched no hit	hit x - hit y
MRP20	2.01339	WT_vs_Control	enriched hit	3.21512	MUT_vs_Control	enriched hit	MUT_vs_Control_against_WT_vs_Control	enriched hit	hit x - hit y
JIP5	2.46243	WT_vs_Control	enriched hit	2.31775	MUT_vs_Control	enriched hit	MUT_vs_Control_against_WT_vs_Control	enriched no hit	hit x - hit y
TPS1	2.02977	WT_vs_Control	enriched hit	2.12349	MUT_vs_Control	enriched hit	MUT_vs_Control_against_WT_vs_Control	enriched no hit	hit x - hit y
ERB1	2.43539	WT_vs_Control	enriched hit	3.06171	MUT_vs_Control	enriched hit	MUT_vs_Control_against_WT_vs_Control	enriched candidate	hit x - hit y
RPH1	4.02404	WT_vs_Control	enriched hit	2.83337	MUT_vs_Control	enriched hit	MUT_vs_Control_against_WT_vs_Control	enriched candidate	hit x - hit y
CRC1	1.82802	WT_vs_Control	enriched hit	2.19747	MUT_vs_Control	enriched hit	MUT_vs_Control_against_WT_vs_Control	enriched no hit	hit x - hit y
IPP1	1.85053	WT_vs_Control	enriched hit	2.42768	MUT_vs_Control	enriched hit	MUT_vs_Control_against_WT_vs_Control	enriched no hit	hit x - hit y
YTA7	4.58552	WT_vs_Control	enriched hit	2.65201	MUT_vs_Control	enriched hit	MUT_vs_Control_against_WT_vs_Control	enriched candidate	hit x - hit y
RPL16A	3.44934	WT_vs_Control	enriched hit	3.99169	MUT_vs_Control	enriched hit	MUT_vs_Control_against_WT_vs_Control	enriched no hit	hit x - hit y
RPN1	2.18048	WT_vs_Control	enriched hit	2.3646	MUT_vs_Control	enriched hit	MUT_vs_Control_against_WT_vs_Control	enriched no hit	hit x - hit y
SUC2	2.79453	WT_vs_Control	enriched hit	2.76361	MUT_vs_Control	enriched hit	MUT_vs_Control_against_WT_vs_Control	enriched no hit	hit x - hit y
CDC19	1.79322	WT_vs_Control	enriched hit	2.05777	MUT_vs_Control	enriched hit	MUT_vs_Control_against_WT_vs_Control	enriched no hit	hit x - hit y
SCY1	2.06347	WT_vs_Control	enriched hit	2.356	MUT_vs_Control	enriched hit	MUT_vs_Control_against_WT_vs_Control	enriched no hit	hit x - hit y
VAC8	2.1195	WT_vs_Control	enriched hit	1.66612	MUT_vs_Control	enriched hit	MUT_vs_Control_against_WT_vs_Control	enriched no hit	hit x - hit y
ZTA1	2.35697	WT_vs_Control	enriched hit	2.01168	MUT_vs_Control	enriched hit	MUT_vs_Control_against_WT_vs_Control	enriched no hit	hit x - hit y
RPS23A|RPS23B	3.46658	WT_vs_Control	enriched hit	3.7419	MUT_vs_Control	enriched hit	MUT_vs_Control_against_WT_vs_Control	enriched no hit	hit x - hit y
YTM1	2.60061	WT_vs_Control	enriched hit	3.32431	MUT_vs_Control	enriched hit	MUT_vs_Control_against_WT_vs_Control	enriched candidate	hit x - hit y
HTA1|HTA2	6.28914	WT_vs_Control	enriched hit	4.96076	MUT_vs_Control	enriched hit	MUT_vs_Control_against_WT_vs_Control	enriched no hit	hit x - hit y
RPL4A	3.04717	WT_vs_Control	enriched hit	3.24379	MUT_vs_Control	enriched hit	MUT_vs_Control_against_WT_vs_Control	enriched no hit	hit x - hit y
RNR4	1.9124	WT_vs_Control	enriched hit	2.04592	MUT_vs_Control	enriched hit	MUT_vs_Control_against_WT_vs_Control	enriched no hit	hit x - hit y
PGI1	2.54258	WT_vs_Control	enriched hit	2.78654	MUT_vs_Control	enriched hit	MUT_vs_Control_against_WT_vs_Control	enriched no hit	hit x - hit y
CHD1	2.32934	WT_vs_Control	enriched hit	1.84986	MUT_vs_Control	enriched hit	MUT_vs_Control_against_WT_vs_Control	enriched no hit	hit x - hit y
MSY1	2.89072	WT_vs_Control	enriched hit	2.75643	MUT_vs_Control	enriched hit	MUT_vs_Control_against_WT_vs_Control	enriched no hit	hit x - hit y
PRE7	1.72558	WT_vs_Control	enriched hit	1.97464	MUT_vs_Control	enriched hit	MUT_vs_Control_against_WT_vs_Control	enriched no hit	hit x - hit y
GTT3	2.92121	WT_vs_Control	enriched hit	1.70481	MUT_vs_Control	enriched hit	MUT_vs_Control_against_WT_vs_Control	enriched candidate	hit x - hit y
MSD1	2.27264	WT_vs_Control	enriched hit	2.35213	MUT_vs_Control	enriched hit	MUT_vs_Control_against_WT_vs_Control	enriched no hit	hit x - hit y
RIM1	4.08509	WT_vs_Control	enriched hit	2.82729	MUT_vs_Control	enriched hit	MUT_vs_Control_against_WT_vs_Control	enriched candidate	hit x - hit y
VAS1	1.89053	WT_vs_Control	enriched hit	1.57594	MUT_vs_Control	enriched hit	MUT_vs_Control_against_WT_vs_Control	enriched no hit	hit x - hit y
ADE17	2.3338	WT_vs_Control	enriched hit	2.51205	MUT_vs_Control	enriched hit	MUT_vs_Control_against_WT_vs_Control	enriched no hit	hit x - hit y
POX1	2.61089	WT_vs_Control	enriched hit	3.02847	MUT_vs_Control	enriched hit	MUT_vs_Control_against_WT_vs_Control	enriched no hit	hit x - hit y
SPT16	2.75114	WT_vs_Control	enriched hit	1.85955	MUT_vs_Control	enriched hit	MUT_vs_Control_against_WT_vs_Control	enriched candidate	hit x - hit y
RPL43A|RPL43B	2.93363	WT_vs_Control	enriched hit	3.51103	MUT_vs_Control	enriched hit	MUT_vs_Control_against_WT_vs_Control	enriched no hit	hit x - hit y
CKA2	1.74437	WT_vs_Control	enriched hit	2.26688	MUT_vs_Control	enriched hit	MUT_vs_Control_against_WT_vs_Control	enriched no hit	hit x - hit y
DLD1	1.8811	WT_vs_Control	enriched hit	2.63753	MUT_vs_Control	enriched hit	MUT_vs_Control_against_WT_vs_Control	enriched candidate	hit x - hit y
ADR1	3.7337	WT_vs_Control	enriched hit	2.55575	MUT_vs_Control	enriched hit	MUT_vs_Control_against_WT_vs_Control	enriched candidate	hit x - hit y
MDM38	1.71622	WT_vs_Control	enriched hit	2.04446	MUT_vs_Control	enriched hit	MUT_vs_Control_against_WT_vs_Control	enriched no hit	hit x - hit y
NOP7	2.55639	WT_vs_Control	enriched hit	2.84378	MUT_vs_Control	enriched hit	MUT_vs_Control_against_WT_vs_Control	enriched no hit	hit x - hit y
TES1	2.21919	WT_vs_Control	enriched hit	3.08688	MUT_vs_Control	enriched hit	MUT_vs_Control_against_WT_vs_Control	enriched candidate	hit x - hit y
MAK21	2.16762	WT_vs_Control	enriched hit	2.46277	MUT_vs_Control	enriched hit	MUT_vs_Control_against_WT_vs_Control	enriched no hit	hit x - hit y
PSA1	2.14918	WT_vs_Control	enriched hit	2.44838	MUT_vs_Control	enriched hit	MUT_vs_Control_against_WT_vs_Control	enriched no hit	hit x - hit y
RPS4A|RPS4B	3.06708	WT_vs_Control	enriched hit	3.40481	MUT_vs_Control	enriched hit	MUT_vs_Control_against_WT_vs_Control	enriched no hit	hit x - hit y
YNL247W	2.46442	WT_vs_Control	enriched hit	2.27264	MUT_vs_Control	enriched hit	MUT_vs_Control_against_WT_vs_Control	enriched no hit	hit x - hit y
MCK1	2.30859	WT_vs_Control	enriched hit	2.59284	MUT_vs_Control	enriched hit	MUT_vs_Control_against_WT_vs_Control	enriched no hit	hit x - hit y
AMD1	2.08046	WT_vs_Control	enriched hit	3.12	MUT_vs_Control	enriched hit	MUT_vs_Control_against_WT_vs_Control	enriched hit	hit x - hit y
VTC4	2.14338	WT_vs_Control	enriched hit	2.46204	MUT_vs_Control	enriched hit	MUT_vs_Control_against_WT_vs_Control	enriched no hit	hit x - hit y
SMC6	2.55623	WT_vs_Control	enriched hit	2.35535	MUT_vs_Control	enriched hit	MUT_vs_Control_against_WT_vs_Control	enriched no hit	hit x - hit y
VMA13	1.76855	WT_vs_Control	enriched hit	2.13742	MUT_vs_Control	enriched hit	MUT_vs_Control_against_WT_vs_Control	enriched no hit	hit x - hit y
RPA190	2.54024	WT_vs_Control	enriched hit	2.19963	MUT_vs_Control	enriched hit	MUT_vs_Control_against_WT_vs_Control	enriched no hit	hit x - hit y
MRPL16	3.02049	WT_vs_Control	enriched hit	3.21619	MUT_vs_Control	enriched hit	MUT_vs_Control_against_WT_vs_Control	enriched no hit	hit x - hit y
MET6	2.05466	WT_vs_Control	enriched hit	2.24103	MUT_vs_Control	enriched hit	MUT_vs_Control_against_WT_vs_Control	enriched no hit	hit x - hit y
CRZ1	3.31798	WT_vs_Control	enriched hit	2.30975	MUT_vs_Control	enriched hit	MUT_vs_Control_against_WT_vs_Control	enriched candidate	hit x - hit y
KIN1	2.30646	WT_vs_Control	enriched hit	2.11633	MUT_vs_Control	enriched hit	MUT_vs_Control_against_WT_vs_Control	enriched no hit	hit x - hit y
RPL27A|RPL27B	3.16066	WT_vs_Control	enriched hit	3.457	MUT_vs_Control	enriched hit	MUT_vs_Control_against_WT_vs_Control	enriched no hit	hit x - hit y
MDJ1	1.81662	WT_vs_Control	enriched hit	2.2321	MUT_vs_Control	enriched hit	MUT_vs_Control_against_WT_vs_Control	enriched no hit	hit x - hit y
RSA4	2.60797	WT_vs_Control	enriched hit	2.7811	MUT_vs_Control	enriched hit	MUT_vs_Control_against_WT_vs_Control	enriched no hit	hit x - hit y
PFK2	2.27401	WT_vs_Control	enriched hit	2.70743	MUT_vs_Control	enriched hit	MUT_vs_Control_against_WT_vs_Control	enriched no hit	hit x - hit y
TOP1	2.49184	WT_vs_Control	enriched hit	2.06082	MUT_vs_Control	enriched hit	MUT_vs_Control_against_WT_vs_Control	enriched no hit	hit x - hit y
ERG27	1.78013	WT_vs_Control	enriched hit	1.85777	MUT_vs_Control	enriched hit	MUT_vs_Control_against_WT_vs_Control	enriched no hit	hit x - hit y
PRB1	1.84273	WT_vs_Control	enriched hit	2.1483	MUT_vs_Control	enriched hit	MUT_vs_Control_against_WT_vs_Control	enriched no hit	hit x - hit y
STE24	2.49421	WT_vs_Control	enriched hit	2.28692	MUT_vs_Control	enriched hit	MUT_vs_Control_against_WT_vs_Control	enriched no hit	hit x - hit y
GPT2	2.44248	WT_vs_Control	enriched hit	2.24166	MUT_vs_Control	enriched hit	MUT_vs_Control_against_WT_vs_Control	enriched no hit	hit x - hit y
OLE1	2.14994	WT_vs_Control	enriched hit	1.76133	MUT_vs_Control	enriched hit	MUT_vs_Control_against_WT_vs_Control	enriched no hit	hit x - hit y
TAF1	1.86385	WT_vs_Control	enriched hit	1.78727	MUT_vs_Control	enriched hit	MUT_vs_Control_against_WT_vs_Control	enriched no hit	hit x - hit y
RPP0	2.69468	WT_vs_Control	enriched hit	4.18881	MUT_vs_Control	enriched hit	MUT_vs_Control_against_WT_vs_Control	enriched hit	hit x - hit y
YGR130C	2.42171	WT_vs_Control	enriched hit	3.56011	MUT_vs_Control	enriched hit	MUT_vs_Control_against_WT_vs_Control	enriched hit	hit x - hit y
RPL7A	3.86088	WT_vs_Control	enriched hit	3.77341	MUT_vs_Control	enriched hit	MUT_vs_Control_against_WT_vs_Control	enriched no hit	hit x - hit y
RPN3	2.19214	WT_vs_Control	enriched hit	2.49231	MUT_vs_Control	enriched hit	MUT_vs_Control_against_WT_vs_Control	enriched no hit	hit x - hit y
TIF5	2.06995	WT_vs_Control	enriched hit	2.14291	MUT_vs_Control	enriched hit	MUT_vs_Control_against_WT_vs_Control	enriched no hit	hit x - hit y
DEF1	1.84825	WT_vs_Control	enriched hit	1.77372	MUT_vs_Control	enriched hit	MUT_vs_Control_against_WT_vs_Control	enriched no hit	hit x - hit y
RPL16B	2.62295	WT_vs_Control	enriched hit	3.51951	MUT_vs_Control	enriched hit	MUT_vs_Control_against_WT_vs_Control	enriched candidate	hit x - hit y
SEC27	1.90366	WT_vs_Control	enriched hit	1.90343	MUT_vs_Control	enriched hit	MUT_vs_Control_against_WT_vs_Control	enriched no hit	hit x - hit y
DST1	2.7696	WT_vs_Control	enriched hit	2.89545	MUT_vs_Control	enriched hit	MUT_vs_Control_against_WT_vs_Control	enriched no hit	hit x - hit y
CRP1	3.31244	WT_vs_Control	enriched hit	2.67032	MUT_vs_Control	enriched hit	MUT_vs_Control_against_WT_vs_Control	enriched no hit	hit x - hit y
NIC96	1.79771	WT_vs_Control	enriched hit	1.62896	MUT_vs_Control	enriched hit	MUT_vs_Control_against_WT_vs_Control	enriched no hit	hit x - hit y
NPL6	2.30615	WT_vs_Control	enriched hit	2.14352	MUT_vs_Control	enriched hit	MUT_vs_Control_against_WT_vs_Control	enriched no hit	hit x - hit y
RPT3	2.54359	WT_vs_Control	enriched hit	2.50903	MUT_vs_Control	enriched hit	MUT_vs_Control_against_WT_vs_Control	enriched no hit	hit x - hit y
STH1	1.65036	WT_vs_Control	enriched hit	1.77277	MUT_vs_Control	enriched hit	MUT_vs_Control_against_WT_vs_Control	enriched no hit	hit x - hit y
RRP5	1.93362	WT_vs_Control	enriched hit	1.83333	MUT_vs_Control	enriched hit	MUT_vs_Control_against_WT_vs_Control	enriched no hit	hit x - hit y
MRP7	2.85736	WT_vs_Control	enriched hit	2.74327	MUT_vs_Control	enriched hit	MUT_vs_Control_against_WT_vs_Control	enriched no hit	hit x - hit y
PBP1	2.11743	WT_vs_Control	enriched hit	1.73402	MUT_vs_Control	enriched hit	MUT_vs_Control_against_WT_vs_Control	enriched no hit	hit x - hit y
BRF1	4.02234	WT_vs_Control	enriched hit	2.34767	MUT_vs_Control	enriched hit	MUT_vs_Control_against_WT_vs_Control	enriched candidate	hit x - hit y
ULS1	2.58232	WT_vs_Control	enriched hit	1.83434	MUT_vs_Control	enriched hit	MUT_vs_Control_against_WT_vs_Control	enriched candidate	hit x - hit y
PUP2	2.15398	WT_vs_Control	enriched hit	2.07878	MUT_vs_Control	enriched hit	MUT_vs_Control_against_WT_vs_Control	enriched no hit	hit x - hit y
MYO3	2.60439	WT_vs_Control	enriched hit	3.00559	MUT_vs_Control	enriched hit	MUT_vs_Control_against_WT_vs_Control	enriched no hit	hit x - hit y
CBF1	2.71155	WT_vs_Control	enriched hit	1.55624	MUT_vs_Control	enriched hit	MUT_vs_Control_against_WT_vs_Control	enriched candidate	hit x - hit y
DUG1	1.90935	WT_vs_Control	enriched hit	1.68593	MUT_vs_Control	enriched hit	MUT_vs_Control_against_WT_vs_Control	enriched no hit	hit x - hit y
THO1	1.75729	WT_vs_Control	enriched hit	1.45457	MUT_vs_Control	enriched hit	MUT_vs_Control_against_WT_vs_Control	enriched no hit	hit x - hit y
FBP1	2.27079	WT_vs_Control	enriched hit	2.55658	MUT_vs_Control	enriched hit	MUT_vs_Control_against_WT_vs_Control	enriched no hit	hit x - hit y
MRM1	2.36234	WT_vs_Control	enriched hit	2.64584	MUT_vs_Control	enriched hit	MUT_vs_Control_against_WT_vs_Control	enriched no hit	hit x - hit y
MRPL32	3.12075	WT_vs_Control	enriched hit	2.97807	MUT_vs_Control	enriched hit	MUT_vs_Control_against_WT_vs_Control	enriched no hit	hit x - hit y
IDP2	2.61246	WT_vs_Control	enriched hit	2.79913	MUT_vs_Control	enriched hit	MUT_vs_Control_against_WT_vs_Control	enriched no hit	hit x - hit y
ATP2	1.95502	WT_vs_Control	enriched hit	2.37071	MUT_vs_Control	enriched hit	MUT_vs_Control_against_WT_vs_Control	enriched no hit	hit x - hit y
DBP3	2.27415	WT_vs_Control	enriched hit	2.10221	MUT_vs_Control	enriched hit	MUT_vs_Control_against_WT_vs_Control	enriched no hit	hit x - hit y
INO80	2.38736	WT_vs_Control	enriched hit	2.2878	MUT_vs_Control	enriched hit	MUT_vs_Control_against_WT_vs_Control	enriched no hit	hit x - hit y
SYP1	1.67616	WT_vs_Control	enriched hit	1.49558	MUT_vs_Control	enriched hit	MUT_vs_Control_against_WT_vs_Control	enriched no hit	hit x - hit y
COX2	1.66133	WT_vs_Control	enriched hit	2.32731	MUT_vs_Control	enriched hit	MUT_vs_Control_against_WT_vs_Control	enriched candidate	hit x - hit y
TMA22	3.3628	WT_vs_Control	enriched hit	2.94449	MUT_vs_Control	enriched hit	MUT_vs_Control_against_WT_vs_Control	enriched no hit	hit x - hit y
RSM18	1.70904	WT_vs_Control	enriched hit	2.63159	MUT_vs_Control	enriched hit	MUT_vs_Control_against_WT_vs_Control	enriched candidate	hit x - hit y
PIP2	2.67829	WT_vs_Control	enriched hit	2.11161	MUT_vs_Control	enriched hit	MUT_vs_Control_against_WT_vs_Control	enriched no hit	hit x - hit y
UBA1	2.29072	WT_vs_Control	enriched hit	2.487	MUT_vs_Control	enriched hit	MUT_vs_Control_against_WT_vs_Control	enriched no hit	hit x - hit y
NOP12	2.08921	WT_vs_Control	enriched hit	2.59972	MUT_vs_Control	enriched hit	MUT_vs_Control_against_WT_vs_Control	enriched no hit	hit x - hit y
SSD1	3.2993	WT_vs_Control	enriched hit	3.66395	MUT_vs_Control	enriched hit	MUT_vs_Control_against_WT_vs_Control	enriched no hit	hit x - hit y
SCL1	1.65366	WT_vs_Control	enriched hit	1.85702	MUT_vs_Control	enriched hit	MUT_vs_Control_against_WT_vs_Control	enriched no hit	hit x - hit y
INO1	2.44197	WT_vs_Control	enriched hit	2.44998	MUT_vs_Control	enriched hit	MUT_vs_Control_against_WT_vs_Control	enriched no hit	hit x - hit y
RRP14	2.1955	WT_vs_Control	enriched hit	2.26944	MUT_vs_Control	enriched hit	MUT_vs_Control_against_WT_vs_Control	enriched no hit	hit x - hit y
NOP1	2.51691	WT_vs_Control	enriched hit	1.95826	MUT_vs_Control	enriched hit	MUT_vs_Control_against_WT_vs_Control	enriched no hit	hit x - hit y
ERG10	2.93289	WT_vs_Control	enriched hit	2.96319	MUT_vs_Control	enriched hit	MUT_vs_Control_against_WT_vs_Control	enriched no hit	hit x - hit y
PDS5	1.74289	WT_vs_Control	enriched hit	2.58723	MUT_vs_Control	enriched hit	MUT_vs_Control_against_WT_vs_Control	enriched candidate	hit x - hit y
SPP41	2.70034	WT_vs_Control	enriched hit	1.97548	MUT_vs_Control	enriched hit	MUT_vs_Control_against_WT_vs_Control	enriched no hit	hit x - hit y
RPN6	1.7708	WT_vs_Control	enriched hit	1.78479	MUT_vs_Control	enriched hit	MUT_vs_Control_against_WT_vs_Control	enriched no hit	hit x - hit y
RPL6A	2.50879	WT_vs_Control	enriched hit	3.08916	MUT_vs_Control	enriched hit	MUT_vs_Control_against_WT_vs_Control	enriched no hit	hit x - hit y
BDH1	1.6817	WT_vs_Control	enriched hit	2.1254	MUT_vs_Control	enriched hit	MUT_vs_Control_against_WT_vs_Control	enriched no hit	hit x - hit y
ALD6	1.72893	WT_vs_Control	enriched hit	2.37742	MUT_vs_Control	enriched hit	MUT_vs_Control_against_WT_vs_Control	enriched candidate	hit x - hit y
ARO9	1.87167	WT_vs_Control	enriched hit	2.11465	MUT_vs_Control	enriched hit	MUT_vs_Control_against_WT_vs_Control	enriched no hit	hit x - hit y
ZIP1	2.707	WT_vs_Control	enriched hit	3.27178	MUT_vs_Control	enriched hit	MUT_vs_Control_against_WT_vs_Control	enriched no hit	hit x - hit y
HPC2	2.51759	WT_vs_Control	enriched hit	1.93435	MUT_vs_Control	enriched hit	MUT_vs_Control_against_WT_vs_Control	enriched no hit	hit x - hit y
YNR021W	2.49137	WT_vs_Control	enriched hit	2.009	MUT_vs_Control	enriched hit	MUT_vs_Control_against_WT_vs_Control	enriched no hit	hit x - hit y
SLI15	1.7768	WT_vs_Control	enriched hit	2.12778	MUT_vs_Control	enriched hit	MUT_vs_Control_against_WT_vs_Control	enriched no hit	hit x - hit y
YAT2	1.85071	WT_vs_Control	enriched hit	2.07287	MUT_vs_Control	enriched hit	MUT_vs_Control_against_WT_vs_Control	enriched no hit	hit x - hit y
RPS14A|RPS14B	1.68532	WT_vs_Control	enriched hit	1.85567	MUT_vs_Control	enriched hit	MUT_vs_Control_against_WT_vs_Control	enriched no hit	hit x - hit y
POM33	2.58258	WT_vs_Control	enriched hit	2.35234	MUT_vs_Control	enriched hit	MUT_vs_Control_against_WT_vs_Control	enriched no hit	hit x - hit y
HIR3	2.82189	WT_vs_Control	enriched hit	1.98448	MUT_vs_Control	enriched hit	MUT_vs_Control_against_WT_vs_Control	enriched candidate	hit x - hit y
NOP58	2.4442	WT_vs_Control	enriched hit	2.18414	MUT_vs_Control	enriched hit	MUT_vs_Control_against_WT_vs_Control	enriched no hit	hit x - hit y
YPK2	2.30389	WT_vs_Control	enriched hit	3.37777	MUT_vs_Control	enriched hit	MUT_vs_Control_against_WT_vs_Control	enriched candidate	hit x - hit y
GCV2	2.00751	WT_vs_Control	enriched hit	2.12905	MUT_vs_Control	enriched hit	MUT_vs_Control_against_WT_vs_Control	enriched no hit	hit x - hit y
IPI3	2.17579	WT_vs_Control	enriched hit	2.327	MUT_vs_Control	enriched hit	MUT_vs_Control_against_WT_vs_Control	enriched no hit	hit x - hit y
GLR1	1.88068	WT_vs_Control	enriched hit	1.94337	MUT_vs_Control	enriched hit	MUT_vs_Control_against_WT_vs_Control	enriched no hit	hit x - hit y
NTO1	3.82604	WT_vs_Control	enriched hit	2.15938	MUT_vs_Control	enriched hit	MUT_vs_Control_against_WT_vs_Control	enriched candidate	hit x - hit y
SDH2	2.03512	WT_vs_Control	enriched hit	2.45058	MUT_vs_Control	enriched hit	MUT_vs_Control_against_WT_vs_Control	enriched no hit	hit x - hit y
ARD1	1.97101	WT_vs_Control	enriched hit	2.06197	MUT_vs_Control	enriched hit	MUT_vs_Control_against_WT_vs_Control	enriched no hit	hit x - hit y
PRO3	1.93489	WT_vs_Control	enriched hit	1.9466	MUT_vs_Control	enriched hit	MUT_vs_Control_against_WT_vs_Control	enriched no hit	hit x - hit y
MYO2	1.80927	WT_vs_Control	enriched hit	2.4214	MUT_vs_Control	enriched hit	MUT_vs_Control_against_WT_vs_Control	enriched candidate	hit x - hit y
NIP1	2.45007	WT_vs_Control	enriched hit	2.4353	MUT_vs_Control	enriched hit	MUT_vs_Control_against_WT_vs_Control	enriched no hit	hit x - hit y
COP1	1.61528	WT_vs_Control	enriched hit	1.82015	MUT_vs_Control	enriched hit	MUT_vs_Control_against_WT_vs_Control	enriched no hit	hit x - hit y
EPL1	2.25973	WT_vs_Control	enriched hit	1.98323	MUT_vs_Control	enriched hit	MUT_vs_Control_against_WT_vs_Control	enriched no hit	hit x - hit y
MIS1	2.7149	WT_vs_Control	enriched hit	2.88742	MUT_vs_Control	enriched hit	MUT_vs_Control_against_WT_vs_Control	enriched no hit	hit x - hit y
ADE5,7	1.73468	WT_vs_Control	enriched hit	2.04498	MUT_vs_Control	enriched hit	MUT_vs_Control_against_WT_vs_Control	enriched no hit	hit x - hit y
IMD4	2.29074	WT_vs_Control	enriched hit	2.67954	MUT_vs_Control	enriched hit	MUT_vs_Control_against_WT_vs_Control	enriched no hit	hit x - hit y
MVD1	1.82043	WT_vs_Control	enriched hit	2.09767	MUT_vs_Control	enriched hit	MUT_vs_Control_against_WT_vs_Control	enriched no hit	hit x - hit y
HRK1	1.59746	WT_vs_Control	enriched hit	2.93545	MUT_vs_Control	enriched hit	MUT_vs_Control_against_WT_vs_Control	enriched hit	hit x - hit y
GCN2	2.34312	WT_vs_Control	enriched hit	2.50948	MUT_vs_Control	enriched hit	MUT_vs_Control_against_WT_vs_Control	enriched no hit	hit x - hit y
PRE3	1.61271	WT_vs_Control	enriched hit	1.74684	MUT_vs_Control	enriched hit	MUT_vs_Control_against_WT_vs_Control	enriched no hit	hit x - hit y
SEC7	1.63831	WT_vs_Control	enriched hit	1.72144	MUT_vs_Control	enriched hit	MUT_vs_Control_against_WT_vs_Control	enriched no hit	hit x - hit y
TIF34	2.47835	WT_vs_Control	enriched hit	2.0567	MUT_vs_Control	enriched hit	MUT_vs_Control_against_WT_vs_Control	enriched no hit	hit x - hit y
GLN1	1.76995	WT_vs_Control	enriched hit	2.15126	MUT_vs_Control	enriched hit	MUT_vs_Control_against_WT_vs_Control	enriched no hit	hit x - hit y
ENO2	1.61777	WT_vs_Control	enriched hit	1.77715	MUT_vs_Control	enriched hit	MUT_vs_Control_against_WT_vs_Control	enriched no hit	hit x - hit y
RPL19A|RPL19B	4.52997	WT_vs_Control	enriched hit	3.92033	MUT_vs_Control	enriched hit	MUT_vs_Control_against_WT_vs_Control	enriched no hit	hit x - hit y
NAM7	2.00168	WT_vs_Control	enriched hit	1.95883	MUT_vs_Control	enriched hit	MUT_vs_Control_against_WT_vs_Control	enriched no hit	hit x - hit y
FPR3	2.76691	WT_vs_Control	enriched hit	3.48741	MUT_vs_Control	enriched hit	MUT_vs_Control_against_WT_vs_Control	enriched no hit	hit x - hit y
GPH1	1.55102	WT_vs_Control	enriched hit	1.8225	MUT_vs_Control	enriched hit	MUT_vs_Control_against_WT_vs_Control	enriched no hit	hit x - hit y
YNL040W	1.73253	WT_vs_Control	enriched hit	1.27882	MUT_vs_Control	enriched hit	MUT_vs_Control_against_WT_vs_Control	enriched no hit	hit x - hit y
RPA49	2.46581	WT_vs_Control	enriched hit	1.92801	MUT_vs_Control	enriched hit	MUT_vs_Control_against_WT_vs_Control	enriched no hit	hit x - hit y
URA2	2.70258	WT_vs_Control	enriched hit	2.98923	MUT_vs_Control	enriched hit	MUT_vs_Control_against_WT_vs_Control	enriched no hit	hit x - hit y
SRP40	3.18321	WT_vs_Control	enriched hit	3.33927	MUT_vs_Control	enriched hit	MUT_vs_Control_against_WT_vs_Control	enriched no hit	hit x - hit y
CSE4	2.46007	WT_vs_Control	enriched hit	1.36429	MUT_vs_Control	enriched hit	MUT_vs_Control_against_WT_vs_Control	enriched candidate	hit x - hit y
RML2	3.57646	WT_vs_Control	enriched hit	3.4829	MUT_vs_Control	enriched hit	MUT_vs_Control_against_WT_vs_Control	enriched no hit	hit x - hit y
RNR1	2.2283	WT_vs_Control	enriched hit	2.43643	MUT_vs_Control	enriched hit	MUT_vs_Control_against_WT_vs_Control	enriched no hit	hit x - hit y
MCM4	2.62363	WT_vs_Control	enriched hit	2.04591	MUT_vs_Control	enriched hit	MUT_vs_Control_against_WT_vs_Control	enriched no hit	hit x - hit y
SAC6	2.12358	WT_vs_Control	enriched hit	2.14299	MUT_vs_Control	enriched hit	MUT_vs_Control_against_WT_vs_Control	enriched no hit	hit x - hit y
PET127	1.67535	WT_vs_Control	enriched hit	1.97698	MUT_vs_Control	enriched hit	MUT_vs_Control_against_WT_vs_Control	enriched no hit	hit x - hit y
KGD1	2.35996	WT_vs_Control	enriched hit	2.52896	MUT_vs_Control	enriched hit	MUT_vs_Control_against_WT_vs_Control	enriched no hit	hit x - hit y
MRPL3	1.66553	WT_vs_Control	enriched hit	2.32694	MUT_vs_Control	enriched hit	MUT_vs_Control_against_WT_vs_Control	enriched candidate	hit x - hit y
RPL2A|RPL2B	3.51954	WT_vs_Control	enriched hit	4.11536	MUT_vs_Control	enriched hit	MUT_vs_Control_against_WT_vs_Control	enriched no hit	hit x - hit y
SWR1	3.89299	WT_vs_Control	enriched hit	3.0593	MUT_vs_Control	enriched hit	MUT_vs_Control_against_WT_vs_Control	enriched no hit	hit x - hit y
CNM67	2.19044	WT_vs_Control	enriched hit	2.58525	MUT_vs_Control	enriched hit	MUT_vs_Control_against_WT_vs_Control	enriched no hit	hit x - hit y
RPB11	2.49479	WT_vs_Control	enriched hit	1.59754	MUT_vs_Control	enriched hit	MUT_vs_Control_against_WT_vs_Control	enriched candidate	hit x - hit y
SPT7	2.99433	WT_vs_Control	enriched hit	2.53778	MUT_vs_Control	enriched hit	MUT_vs_Control_against_WT_vs_Control	enriched no hit	hit x - hit y
RPS13	1.95556	WT_vs_Control	enriched hit	3.2547	MUT_vs_Control	enriched hit	MUT_vs_Control_against_WT_vs_Control	enriched hit	hit x - hit y
RPO31	2.35338	WT_vs_Control	enriched hit	1.81866	MUT_vs_Control	enriched hit	MUT_vs_Control_against_WT_vs_Control	enriched no hit	hit x - hit y
NDI1	2.26437	WT_vs_Control	enriched hit	2.91152	MUT_vs_Control	enriched hit	MUT_vs_Control_against_WT_vs_Control	enriched no hit	hit x - hit y
GDB1	1.456	WT_vs_Control	enriched hit	1.71349	MUT_vs_Control	enriched hit	MUT_vs_Control_against_WT_vs_Control	enriched no hit	hit x - hit y
TCP1	2.10614	WT_vs_Control	enriched hit	2.31449	MUT_vs_Control	enriched hit	MUT_vs_Control_against_WT_vs_Control	enriched no hit	hit x - hit y
CRM1	1.69556	WT_vs_Control	enriched hit	2.10552	MUT_vs_Control	enriched hit	MUT_vs_Control_against_WT_vs_Control	enriched no hit	hit x - hit y
BGL2	1.85987	WT_vs_Control	enriched hit	2.68561	MUT_vs_Control	enriched hit	MUT_vs_Control_against_WT_vs_Control	enriched candidate	hit x - hit y
YLR278C	2.13622	WT_vs_Control	enriched hit	1.75583	MUT_vs_Control	enriched hit	MUT_vs_Control_against_WT_vs_Control	enriched no hit	hit x - hit y
CDC10	3.06894	WT_vs_Control	enriched hit	2.63505	MUT_vs_Control	enriched hit	MUT_vs_Control_against_WT_vs_Control	enriched no hit	hit x - hit y
PMT2	1.58682	WT_vs_Control	enriched hit	1.50344	MUT_vs_Control	enriched hit	MUT_vs_Control_against_WT_vs_Control	enriched no hit	hit x - hit y
RPL36B	3.49682	WT_vs_Control	enriched hit	4.09889	MUT_vs_Control	enriched hit	MUT_vs_Control_against_WT_vs_Control	enriched no hit	hit x - hit y
RPL37A	3.26656	WT_vs_Control	enriched hit	3.00604	MUT_vs_Control	enriched hit	MUT_vs_Control_against_WT_vs_Control	enriched no hit	hit x - hit y
RPL18A|RPL18B	3.7391	WT_vs_Control	enriched hit	3.45943	MUT_vs_Control	enriched hit	MUT_vs_Control_against_WT_vs_Control	enriched no hit	hit x - hit y
RPL6B	2.3356	WT_vs_Control	enriched hit	3.01193	MUT_vs_Control	enriched hit	MUT_vs_Control_against_WT_vs_Control	enriched no hit	hit x - hit y
PRP19	2.50092	WT_vs_Control	enriched hit	2.78802	MUT_vs_Control	enriched hit	MUT_vs_Control_against_WT_vs_Control	enriched no hit	hit x - hit y
TRM1	1.81388	WT_vs_Control	enriched hit	2.03575	MUT_vs_Control	enriched hit	MUT_vs_Control_against_WT_vs_Control	enriched no hit	hit x - hit y
ERG6	1.5339	WT_vs_Control	enriched hit	1.7249	MUT_vs_Control	enriched hit	MUT_vs_Control_against_WT_vs_Control	enriched no hit	hit x - hit y
SCC2	1.95277	WT_vs_Control	enriched hit	2.44591	MUT_vs_Control	enriched hit	MUT_vs_Control_against_WT_vs_Control	enriched no hit	hit x - hit y
ARB1	2.35613	WT_vs_Control	enriched hit	1.90216	MUT_vs_Control	enriched hit	MUT_vs_Control_against_WT_vs_Control	enriched no hit	hit x - hit y
RPL42A|RPL42B	3.65656	WT_vs_Control	enriched hit	3.8858	MUT_vs_Control	enriched hit	MUT_vs_Control_against_WT_vs_Control	enriched no hit	hit x - hit y
ENO1	2.04818	WT_vs_Control	enriched hit	2.57237	MUT_vs_Control	enriched hit	MUT_vs_Control_against_WT_vs_Control	enriched no hit	hit x - hit y
DNM1	2.0396	WT_vs_Control	enriched hit	2.21517	MUT_vs_Control	enriched hit	MUT_vs_Control_against_WT_vs_Control	enriched no hit	hit x - hit y
RFC1	2.22731	WT_vs_Control	enriched hit	1.8958	MUT_vs_Control	enriched hit	MUT_vs_Control_against_WT_vs_Control	enriched no hit	hit x - hit y
FHL1	2.69562	WT_vs_Control	enriched hit	2.07393	MUT_vs_Control	enriched hit	MUT_vs_Control_against_WT_vs_Control	enriched no hit	hit x - hit y
YHR020W	1.81378	WT_vs_Control	enriched hit	1.36893	MUT_vs_Control	enriched hit	MUT_vs_Control_against_WT_vs_Control	enriched no hit	hit x - hit y
VPS17	1.69319	WT_vs_Control	enriched hit	2.02489	MUT_vs_Control	enriched hit	MUT_vs_Control_against_WT_vs_Control	enriched no hit	hit x - hit y
RTS1	2.63415	WT_vs_Control	enriched hit	2.85008	MUT_vs_Control	enriched hit	MUT_vs_Control_against_WT_vs_Control	enriched no hit	hit x - hit y
PAB1	1.66883	WT_vs_Control	enriched hit	1.27777	MUT_vs_Control	enriched hit	MUT_vs_Control_against_WT_vs_Control	enriched no hit	hit x - hit y
GLK1	2.11082	WT_vs_Control	enriched hit	2.25726	MUT_vs_Control	enriched hit	MUT_vs_Control_against_WT_vs_Control	enriched no hit	hit x - hit y
RPS6A|RPS6B	2.72666	WT_vs_Control	enriched hit	2.68683	MUT_vs_Control	enriched hit	MUT_vs_Control_against_WT_vs_Control	enriched no hit	hit x - hit y
YGR266W	1.98732	WT_vs_Control	enriched hit	2.47909	MUT_vs_Control	enriched hit	MUT_vs_Control_against_WT_vs_Control	enriched no hit	hit x - hit y
COR1	1.78617	WT_vs_Control	enriched hit	2.9215	MUT_vs_Control	enriched hit	MUT_vs_Control_against_WT_vs_Control	enriched hit	hit x - hit y
RPS7B	2.05305	WT_vs_Control	enriched hit	2.28707	MUT_vs_Control	enriched hit	MUT_vs_Control_against_WT_vs_Control	enriched no hit	hit x - hit y
VPS72	2.74257	WT_vs_Control	enriched hit	1.80132	MUT_vs_Control	enriched hit	MUT_vs_Control_against_WT_vs_Control	enriched candidate	hit x - hit y
RPL22A	1.67682	WT_vs_Control	enriched hit	1.52435	MUT_vs_Control	enriched hit	MUT_vs_Control_against_WT_vs_Control	enriched no hit	hit x - hit y
SMY2	2.0638	WT_vs_Control	enriched hit	2.18552	MUT_vs_Control	enriched hit	MUT_vs_Control_against_WT_vs_Control	enriched no hit	hit x - hit y
MOT1	2.94197	WT_vs_Control	enriched hit	2.54044	MUT_vs_Control	enriched hit	MUT_vs_Control_against_WT_vs_Control	enriched no hit	hit x - hit y
RIO2	2.17261	WT_vs_Control	enriched hit	2.44124	MUT_vs_Control	enriched hit	MUT_vs_Control_against_WT_vs_Control	enriched no hit	hit x - hit y
SLM1	2.91324	WT_vs_Control	enriched hit	3.35604	MUT_vs_Control	enriched hit	MUT_vs_Control_against_WT_vs_Control	enriched no hit	hit x - hit y
TUB1|TUB3	1.67617	WT_vs_Control	enriched hit	2.64498	MUT_vs_Control	enriched hit	MUT_vs_Control_against_WT_vs_Control	enriched candidate	hit x - hit y
GLC3	1.60468	WT_vs_Control	enriched hit	1.90508	MUT_vs_Control	enriched hit	MUT_vs_Control_against_WT_vs_Control	enriched no hit	hit x - hit y
CPS1	1.52352	WT_vs_Control	enriched hit	1.88826	MUT_vs_Control	enriched hit	MUT_vs_Control_against_WT_vs_Control	enriched no hit	hit x - hit y
CCT3	1.72329	WT_vs_Control	enriched hit	1.85048	MUT_vs_Control	enriched hit	MUT_vs_Control_against_WT_vs_Control	enriched no hit	hit x - hit y
RPL21A|RPL21B	2.21097	WT_vs_Control	enriched hit	3.15118	MUT_vs_Control	enriched hit	MUT_vs_Control_against_WT_vs_Control	enriched candidate	hit x - hit y
PEP4	1.93284	WT_vs_Control	enriched hit	2.37318	MUT_vs_Control	enriched hit	MUT_vs_Control_against_WT_vs_Control	enriched no hit	hit x - hit y
GAS1	1.90125	WT_vs_Control	enriched hit	2.29383	MUT_vs_Control	enriched hit	MUT_vs_Control_against_WT_vs_Control	enriched no hit	hit x - hit y
ARG1	2.08566	WT_vs_Control	enriched hit	1.46789	MUT_vs_Control	enriched hit	MUT_vs_Control_against_WT_vs_Control	enriched no hit	hit x - hit y
UTP23	2.44412	WT_vs_Control	enriched hit	1.84261	MUT_vs_Control	enriched hit	MUT_vs_Control_against_WT_vs_Control	enriched no hit	hit x - hit y
ADE3	2.14836	WT_vs_Control	enriched hit	2.80857	MUT_vs_Control	enriched hit	MUT_vs_Control_against_WT_vs_Control	enriched no hit	hit x - hit y
CCT4	2.44305	WT_vs_Control	enriched hit	2.30133	MUT_vs_Control	enriched hit	MUT_vs_Control_against_WT_vs_Control	enriched no hit	hit x - hit y
TAF14	2.90813	WT_vs_Control	enriched hit	1.78431	MUT_vs_Control	enriched hit	MUT_vs_Control_against_WT_vs_Control	enriched candidate	hit x - hit y
IDP3	1.63442	WT_vs_Control	enriched hit	2.05983	MUT_vs_Control	enriched hit	MUT_vs_Control_against_WT_vs_Control	enriched no hit	hit x - hit y
PGK1	1.43653	WT_vs_Control	enriched hit	1.43512	MUT_vs_Control	enriched hit	MUT_vs_Control_against_WT_vs_Control	enriched no hit	hit x - hit y
LYS1	1.9172	WT_vs_Control	enriched hit	1.48647	MUT_vs_Control	enriched hit	MUT_vs_Control_against_WT_vs_Control	enriched no hit	hit x - hit y
GGA1	1.9546	WT_vs_Control	enriched hit	1.75794	MUT_vs_Control	enriched hit	MUT_vs_Control_against_WT_vs_Control	enriched no hit	hit x - hit y
ARL1	1.92718	WT_vs_Control	enriched hit	2.07317	MUT_vs_Control	enriched hit	MUT_vs_Control_against_WT_vs_Control	enriched no hit	hit x - hit y
NTH1	2.06892	WT_vs_Control	enriched hit	1.7271	MUT_vs_Control	enriched hit	MUT_vs_Control_against_WT_vs_Control	enriched no hit	hit x - hit y
CDC24	2.58204	WT_vs_Control	enriched hit	3.13366	MUT_vs_Control	enriched hit	MUT_vs_Control_against_WT_vs_Control	enriched no hit	hit x - hit y
ARX1	3.58589	WT_vs_Control	enriched hit	2.82076	MUT_vs_Control	enriched hit	MUT_vs_Control_against_WT_vs_Control	enriched no hit	hit x - hit y
MRPL11	2.85561	WT_vs_Control	enriched hit	3.18998	MUT_vs_Control	enriched hit	MUT_vs_Control_against_WT_vs_Control	enriched no hit	hit x - hit y
ADH2	2.30187	WT_vs_Control	enriched hit	2.94294	MUT_vs_Control	enriched hit	MUT_vs_Control_against_WT_vs_Control	enriched no hit	hit x - hit y
RSC9	2.6127	WT_vs_Control	enriched hit	2.57179	MUT_vs_Control	enriched hit	MUT_vs_Control_against_WT_vs_Control	enriched no hit	hit x - hit y
PCK1	1.91529	WT_vs_Control	enriched hit	2.32846	MUT_vs_Control	enriched hit	MUT_vs_Control_against_WT_vs_Control	enriched no hit	hit x - hit y
TIF1	2.33752	WT_vs_Control	enriched hit	2.30435	MUT_vs_Control	enriched hit	MUT_vs_Control_against_WT_vs_Control	enriched no hit	hit x - hit y
SAM1	2.11815	WT_vs_Control	enriched hit	2.32424	MUT_vs_Control	enriched hit	MUT_vs_Control_against_WT_vs_Control	enriched no hit	hit x - hit y
RPL32	3.7947	WT_vs_Control	enriched hit	3.86238	MUT_vs_Control	enriched hit	MUT_vs_Control_against_WT_vs_Control	enriched no hit	hit x - hit y
TAF6	2.52789	WT_vs_Control	enriched hit	2.14993	MUT_vs_Control	enriched hit	MUT_vs_Control_against_WT_vs_Control	enriched no hit	hit x - hit y
XRN1	1.9266	WT_vs_Control	enriched hit	1.87737	MUT_vs_Control	enriched hit	MUT_vs_Control_against_WT_vs_Control	enriched no hit	hit x - hit y
FAA2	2.40229	WT_vs_Control	enriched hit	2.6718	MUT_vs_Control	enriched hit	MUT_vs_Control_against_WT_vs_Control	enriched no hit	hit x - hit y
KIN2	1.71331	WT_vs_Control	enriched hit	4.77632	MUT_vs_Control	enriched hit	MUT_vs_Control_against_WT_vs_Control	enriched hit	hit x - hit y
RPL13B|RPL13A	2.52299	WT_vs_Control	enriched hit	3.01417	MUT_vs_Control	enriched hit	MUT_vs_Control_against_WT_vs_Control	enriched no hit	hit x - hit y
SDH1	1.99578	WT_vs_Control	enriched hit	2.13544	MUT_vs_Control	enriched hit	MUT_vs_Control_against_WT_vs_Control	enriched no hit	hit x - hit y
PRS1	1.83305	WT_vs_Control	enriched hit	2.71866	MUT_vs_Control	enriched hit	MUT_vs_Control_against_WT_vs_Control	enriched candidate	hit x - hit y
SEC18	1.7762	WT_vs_Control	enriched hit	1.67529	MUT_vs_Control	enriched hit	MUT_vs_Control_against_WT_vs_Control	enriched no hit	hit x - hit y
SDS24	1.39622	WT_vs_Control	enriched hit	1.48115	MUT_vs_Control	enriched hit	MUT_vs_Control_against_WT_vs_Control	enriched no hit	hit x - hit y
MDH3	2.88919	WT_vs_Control	enriched hit	2.98304	MUT_vs_Control	enriched hit	MUT_vs_Control_against_WT_vs_Control	enriched no hit	hit x - hit y
CYT1	1.62063	WT_vs_Control	enriched hit	2.57635	MUT_vs_Control	enriched hit	MUT_vs_Control_against_WT_vs_Control	enriched candidate	hit x - hit y
UTP5	1.83487	WT_vs_Control	enriched hit	1.79974	MUT_vs_Control	enriched hit	MUT_vs_Control_against_WT_vs_Control	enriched no hit	hit x - hit y
TRP3	1.9057	WT_vs_Control	enriched hit	2.17118	MUT_vs_Control	enriched hit	MUT_vs_Control_against_WT_vs_Control	enriched no hit	hit x - hit y
EIS1	1.55578	WT_vs_Control	enriched hit	1.91953	MUT_vs_Control	enriched hit	MUT_vs_Control_against_WT_vs_Control	enriched no hit	hit x - hit y
ADH1	1.28351	WT_vs_Control	enriched hit	1.38859	MUT_vs_Control	enriched hit	MUT_vs_Control_against_WT_vs_Control	enriched no hit	hit x - hit y
PCS60	2.02967	WT_vs_Control	enriched hit	2.40742	MUT_vs_Control	enriched hit	MUT_vs_Control_against_WT_vs_Control	enriched no hit	hit x - hit y
RPL24A	2.32592	WT_vs_Control	enriched hit	2.49727	MUT_vs_Control	enriched hit	MUT_vs_Control_against_WT_vs_Control	enriched no hit	hit x - hit y
RAP1	2.569	WT_vs_Control	enriched hit	1.50591	MUT_vs_Control	enriched hit	MUT_vs_Control_against_WT_vs_Control	enriched candidate	hit x - hit y
RPT2	1.60669	WT_vs_Control	enriched hit	1.83329	MUT_vs_Control	enriched hit	MUT_vs_Control_against_WT_vs_Control	enriched no hit	hit x - hit y
SRO9	1.33761	WT_vs_Control	enriched hit	3.12537	MUT_vs_Control	enriched hit	MUT_vs_Control_against_WT_vs_Control	enriched hit	hit x - hit y
GGA2	1.91035	WT_vs_Control	enriched hit	2.27137	MUT_vs_Control	enriched hit	MUT_vs_Control_against_WT_vs_Control	enriched no hit	hit x - hit y
IMH1	1.95528	WT_vs_Control	enriched hit	2.02933	MUT_vs_Control	enriched hit	MUT_vs_Control_against_WT_vs_Control	enriched no hit	hit x - hit y
P1707_RE|RTN1	1.53663	WT_vs_Control	enriched hit	1.7119	MUT_vs_Control	enriched hit	MUT_vs_Control_against_WT_vs_Control	enriched no hit	hit x - hit y
RGI1	1.6764	WT_vs_Control	enriched hit	1.80866	MUT_vs_Control	enriched hit	MUT_vs_Control_against_WT_vs_Control	enriched no hit	hit x - hit y
KAR2	1.9173	WT_vs_Control	enriched hit	1.74738	MUT_vs_Control	enriched hit	MUT_vs_Control_against_WT_vs_Control	enriched no hit	hit x - hit y
YDR115W	1.67007	WT_vs_Control	enriched hit	2.13627	MUT_vs_Control	enriched hit	MUT_vs_Control_against_WT_vs_Control	enriched no hit	hit x - hit y
HCR1	1.50172	WT_vs_Control	enriched hit	2.30369	MUT_vs_Control	enriched hit	MUT_vs_Control_against_WT_vs_Control	enriched candidate	hit x - hit y
RAD51	1.31216	WT_vs_Control	enriched hit	1.50399	MUT_vs_Control	enriched hit	MUT_vs_Control_against_WT_vs_Control	enriched no hit	hit x - hit y
YMR027W	1.54175	WT_vs_Control	enriched hit	2.00569	MUT_vs_Control	enriched hit	MUT_vs_Control_against_WT_vs_Control	enriched no hit	hit x - hit y
RPL24B	1.75398	WT_vs_Control	enriched hit	1.98746	MUT_vs_Control	enriched hit	MUT_vs_Control_against_WT_vs_Control	enriched no hit	hit x - hit y
MRPL36	1.68099	WT_vs_Control	enriched hit	1.92074	MUT_vs_Control	enriched hit	MUT_vs_Control_against_WT_vs_Control	enriched no hit	hit x - hit y
RPT1	1.42908	WT_vs_Control	enriched hit	1.82431	MUT_vs_Control	enriched hit	MUT_vs_Control_against_WT_vs_Control	enriched no hit	hit x - hit y
FLC2	-1.67004	WT_vs_Control	no hit	-1.67355	MUT_vs_Control	no hit	MUT_vs_Control_against_WT_vs_Control	no hit	no hit x - no hit y
HSP60	1.61162	WT_vs_Control	enriched hit	1.69257	MUT_vs_Control	enriched hit	MUT_vs_Control_against_WT_vs_Control	enriched no hit	hit x - hit y
SGV1	1.36583	WT_vs_Control	enriched hit	1.37288	MUT_vs_Control	enriched hit	MUT_vs_Control_against_WT_vs_Control	enriched no hit	hit x - hit y
GCV1	1.73929	WT_vs_Control	enriched hit	1.61494	MUT_vs_Control	enriched hit	MUT_vs_Control_against_WT_vs_Control	enriched no hit	hit x - hit y
BAT2	2.09488	WT_vs_Control	enriched hit	2.13084	MUT_vs_Control	enriched hit	MUT_vs_Control_against_WT_vs_Control	enriched no hit	hit x - hit y
RBG1	1.45135	WT_vs_Control	enriched hit	1.52684	MUT_vs_Control	enriched hit	MUT_vs_Control_against_WT_vs_Control	enriched no hit	hit x - hit y
SEY1	1.31627	WT_vs_Control	enriched hit	1.23254	MUT_vs_Control	enriched hit	MUT_vs_Control_against_WT_vs_Control	enriched no hit	hit x - hit y
QCR2	1.90853	WT_vs_Control	enriched hit	2.8784	MUT_vs_Control	enriched hit	MUT_vs_Control_against_WT_vs_Control	enriched candidate	hit x - hit y
SRL2	1.40854	WT_vs_Control	enriched hit	1.96609	MUT_vs_Control	enriched hit	MUT_vs_Control_against_WT_vs_Control	enriched no hit	hit x - hit y
TUB2	1.31244	WT_vs_Control	enriched hit	2.12436	MUT_vs_Control	enriched hit	MUT_vs_Control_against_WT_vs_Control	enriched candidate	hit x - hit y
CHC1	2.21572	WT_vs_Control	enriched hit	2.53909	MUT_vs_Control	enriched hit	MUT_vs_Control_against_WT_vs_Control	enriched no hit	hit x - hit y
HOM2	1.56759	WT_vs_Control	enriched hit	1.514	MUT_vs_Control	enriched hit	MUT_vs_Control_against_WT_vs_Control	enriched no hit	hit x - hit y
RPL28	2.51101	WT_vs_Control	enriched hit	3.15281	MUT_vs_Control	enriched hit	MUT_vs_Control_against_WT_vs_Control	enriched no hit	hit x - hit y
RTG2	1.64004	WT_vs_Control	enriched hit	1.4865	MUT_vs_Control	enriched hit	MUT_vs_Control_against_WT_vs_Control	enriched no hit	hit x - hit y
YFR006W	1.78459	WT_vs_Control	enriched hit	1.98359	MUT_vs_Control	enriched hit	MUT_vs_Control_against_WT_vs_Control	enriched no hit	hit x - hit y
RET2	1.6079	WT_vs_Control	enriched hit	1.90161	MUT_vs_Control	enriched hit	MUT_vs_Control_against_WT_vs_Control	enriched no hit	hit x - hit y
SOF1	1.35512	WT_vs_Control	enriched hit	1.2836	MUT_vs_Control	enriched hit	MUT_vs_Control_against_WT_vs_Control	enriched no hit	hit x - hit y
VMA1	1.9972	WT_vs_Control	enriched hit	2.2065	MUT_vs_Control	enriched hit	MUT_vs_Control_against_WT_vs_Control	enriched no hit	hit x - hit y
PWP1	1.69517	WT_vs_Control	enriched hit	2.26072	MUT_vs_Control	enriched hit	MUT_vs_Control_against_WT_vs_Control	enriched no hit	hit x - hit y
RVS161	1.92016	WT_vs_Control	enriched hit	1.91176	MUT_vs_Control	enriched hit	MUT_vs_Control_against_WT_vs_Control	enriched no hit	hit x - hit y
RPS28B|RPS28A	1.28797	WT_vs_Control	enriched hit	1.46268	MUT_vs_Control	enriched hit	MUT_vs_Control_against_WT_vs_Control	enriched no hit	hit x - hit y
RPC10	3.95568	WT_vs_Control	enriched hit	2.73947	MUT_vs_Control	enriched hit	MUT_vs_Control_against_WT_vs_Control	enriched no hit	hit x - hit y
TOR2	1.71367	WT_vs_Control	enriched hit	3.21983	MUT_vs_Control	enriched hit	MUT_vs_Control_against_WT_vs_Control	enriched hit	hit x - hit y
HttQx_EGFP	1.23724	WT_vs_Control	enriched hit	0.838385	MUT_vs_Control	enriched candidate	MUT_vs_Control_against_WT_vs_Control	enriched no hit	hit x - candidate y
RAD52	2.48191	WT_vs_Control	enriched hit	2.34816	MUT_vs_Control	enriched hit	MUT_vs_Control_against_WT_vs_Control	enriched no hit	hit x - hit y
RPL3	2.5439	WT_vs_Control	enriched hit	2.91114	MUT_vs_Control	enriched hit	MUT_vs_Control_against_WT_vs_Control	enriched no hit	hit x - hit y
RPS12	1.61945	WT_vs_Control	enriched hit	1.53697	MUT_vs_Control	enriched hit	MUT_vs_Control_against_WT_vs_Control	enriched no hit	hit x - hit y
GLT1	2.91402	WT_vs_Control	enriched hit	2.56502	MUT_vs_Control	enriched hit	MUT_vs_Control_against_WT_vs_Control	enriched no hit	hit x - hit y
SEC8	1.74537	WT_vs_Control	enriched hit	1.72298	MUT_vs_Control	enriched hit	MUT_vs_Control_against_WT_vs_Control	enriched no hit	hit x - hit y
RPS17A|RPS17B	2.02663	WT_vs_Control	enriched hit	2.56817	MUT_vs_Control	enriched hit	MUT_vs_Control_against_WT_vs_Control	enriched no hit	hit x - hit y
CST6	1.62049	WT_vs_Control	enriched hit	2.00889	MUT_vs_Control	enriched hit	MUT_vs_Control_against_WT_vs_Control	enriched no hit	hit x - hit y
CUE5	1.6293	WT_vs_Control	enriched hit	2.59804	MUT_vs_Control	enriched hit	MUT_vs_Control_against_WT_vs_Control	enriched candidate	hit x - hit y
RQC2	2.24736	WT_vs_Control	enriched hit	3.08867	MUT_vs_Control	enriched hit	MUT_vs_Control_against_WT_vs_Control	enriched no hit	hit x - hit y
HEF3	1.77526	WT_vs_Control	enriched hit	1.95456	MUT_vs_Control	enriched hit	MUT_vs_Control_against_WT_vs_Control	enriched no hit	hit x - hit y
CPA2	2.24612	WT_vs_Control	enriched hit	1.3214	MUT_vs_Control	enriched hit	MUT_vs_Control_against_WT_vs_Control	enriched no hit	hit x - hit y
ADE12	1.59797	WT_vs_Control	enriched hit	1.60769	MUT_vs_Control	enriched hit	MUT_vs_Control_against_WT_vs_Control	enriched no hit	hit x - hit y
BMH1	1.5237	WT_vs_Control	enriched hit	1.85694	MUT_vs_Control	enriched hit	MUT_vs_Control_against_WT_vs_Control	enriched no hit	hit x - hit y
PRS3	1.14932	WT_vs_Control	enriched hit	1.07247	MUT_vs_Control	enriched hit	MUT_vs_Control_against_WT_vs_Control	enriched no hit	hit x - hit y
CBR1	1.80327	WT_vs_Control	enriched hit	1.21784	MUT_vs_Control	enriched hit	MUT_vs_Control_against_WT_vs_Control	enriched no hit	hit x - hit y
POR1	2.15109	WT_vs_Control	enriched hit	2.77936	MUT_vs_Control	enriched hit	MUT_vs_Control_against_WT_vs_Control	enriched no hit	hit x - hit y
ARP7	1.04249	WT_vs_Control	enriched hit	1.48959	MUT_vs_Control	enriched hit	MUT_vs_Control_against_WT_vs_Control	enriched no hit	hit x - hit y
CIT1	2.16748	WT_vs_Control	enriched hit	3.18442	MUT_vs_Control	enriched hit	MUT_vs_Control_against_WT_vs_Control	enriched candidate	hit x - hit y
UBP7	1.15789	WT_vs_Control	enriched hit	2.2064	MUT_vs_Control	enriched hit	MUT_vs_Control_against_WT_vs_Control	enriched hit	hit x - hit y
NOT5	-2.13142	WT_vs_Control	no hit	-1.86605	MUT_vs_Control	no hit	MUT_vs_Control_against_WT_vs_Control	no hit	no hit x - no hit y
YBT1	1.44465	WT_vs_Control	enriched hit	1.47506	MUT_vs_Control	enriched hit	MUT_vs_Control_against_WT_vs_Control	enriched no hit	hit x - hit y
HYP2	1.27976	WT_vs_Control	enriched hit	1.42505	MUT_vs_Control	enriched hit	MUT_vs_Control_against_WT_vs_Control	enriched no hit	hit x - hit y
RPS5	1.63694	WT_vs_Control	enriched hit	2.00648	MUT_vs_Control	enriched hit	MUT_vs_Control_against_WT_vs_Control	enriched no hit	hit x - hit y
GPD1	2.31985	WT_vs_Control	enriched hit	2.23518	MUT_vs_Control	enriched hit	MUT_vs_Control_against_WT_vs_Control	enriched no hit	hit x - hit y
FAA1	2.161	WT_vs_Control	enriched hit	2.2181	MUT_vs_Control	enriched hit	MUT_vs_Control_against_WT_vs_Control	enriched no hit	hit x - hit y
VID27	1.21712	WT_vs_Control	enriched hit	1.50041	MUT_vs_Control	enriched hit	MUT_vs_Control_against_WT_vs_Control	enriched no hit	hit x - hit y
ADY3	2.923	WT_vs_Control	enriched hit	3.60395	MUT_vs_Control	enriched hit	MUT_vs_Control_against_WT_vs_Control	enriched no hit	hit x - hit y
SUB2	1.26974	WT_vs_Control	enriched hit	1.5107	MUT_vs_Control	enriched hit	MUT_vs_Control_against_WT_vs_Control	enriched no hit	hit x - hit y
RPL34B|RPL34A	3.93694	WT_vs_Control	enriched hit	4.28886	MUT_vs_Control	enriched hit	MUT_vs_Control_against_WT_vs_Control	enriched no hit	hit x - hit y
FAA4	1.82944	WT_vs_Control	enriched hit	1.81861	MUT_vs_Control	enriched hit	MUT_vs_Control_against_WT_vs_Control	enriched no hit	hit x - hit y
YGL081W	1.8565	WT_vs_Control	enriched hit	1.76523	MUT_vs_Control	enriched hit	MUT_vs_Control_against_WT_vs_Control	enriched no hit	hit x - hit y
GCN5	1.18563	WT_vs_Control	enriched hit	1.14642	MUT_vs_Control	enriched hit	MUT_vs_Control_against_WT_vs_Control	enriched no hit	hit x - hit y
SNC2	-1.99666	WT_vs_Control	no hit	-1.88268	MUT_vs_Control	no hit	MUT_vs_Control_against_WT_vs_Control	no hit	no hit x - no hit y
ERG13	1.55728	WT_vs_Control	enriched hit	1.5364	MUT_vs_Control	enriched hit	MUT_vs_Control_against_WT_vs_Control	enriched no hit	hit x - hit y
SPO22	1.30019	WT_vs_Control	enriched hit	1.87999	MUT_vs_Control	enriched hit	MUT_vs_Control_against_WT_vs_Control	enriched no hit	hit x - hit y
RPS1B	2.17555	WT_vs_Control	enriched hit	2.35119	MUT_vs_Control	enriched hit	MUT_vs_Control_against_WT_vs_Control	enriched no hit	hit x - hit y
SBP1	1.42248	WT_vs_Control	enriched hit	1.21937	MUT_vs_Control	enriched hit	MUT_vs_Control_against_WT_vs_Control	enriched no hit	hit x - hit y
SMC5	1.0604	WT_vs_Control	enriched hit	1.30844	MUT_vs_Control	enriched hit	MUT_vs_Control_against_WT_vs_Control	enriched no hit	hit x - hit y
GUT2	1.50187	WT_vs_Control	enriched hit	1.81442	MUT_vs_Control	enriched hit	MUT_vs_Control_against_WT_vs_Control	enriched no hit	hit x - hit y
CAT2	1.74019	WT_vs_Control	enriched hit	2.12918	MUT_vs_Control	enriched hit	MUT_vs_Control_against_WT_vs_Control	enriched no hit	hit x - hit y
RPS27A|RPS27B	1.45076	WT_vs_Control	enriched hit	2.00759	MUT_vs_Control	enriched hit	MUT_vs_Control_against_WT_vs_Control	enriched no hit	hit x - hit y
IDH1	1.49729	WT_vs_Control	enriched hit	1.63553	MUT_vs_Control	enriched hit	MUT_vs_Control_against_WT_vs_Control	enriched no hit	hit x - hit y
CWP1	1.65767	WT_vs_Control	enriched hit	3.85682	MUT_vs_Control	enriched hit	MUT_vs_Control_against_WT_vs_Control	enriched hit	hit x - hit y
ILV2	1.29217	WT_vs_Control	enriched hit	1.12815	MUT_vs_Control	enriched hit	MUT_vs_Control_against_WT_vs_Control	enriched no hit	hit x - hit y
SEC4	2.16703	WT_vs_Control	enriched hit	2.08884	MUT_vs_Control	enriched hit	MUT_vs_Control_against_WT_vs_Control	enriched no hit	hit x - hit y
RPL8A	1.92865	WT_vs_Control	enriched hit	2.86899	MUT_vs_Control	enriched hit	MUT_vs_Control_against_WT_vs_Control	enriched no hit	hit x - hit y
AIM45	1.31124	WT_vs_Control	enriched hit	1.27418	MUT_vs_Control	enriched hit	MUT_vs_Control_against_WT_vs_Control	enriched no hit	hit x - hit y
DMA2	2.38713	WT_vs_Control	enriched hit	2.77415	MUT_vs_Control	enriched hit	MUT_vs_Control_against_WT_vs_Control	enriched no hit	hit x - hit y
YPT7	1.343	WT_vs_Control	enriched hit	1.47118	MUT_vs_Control	enriched hit	MUT_vs_Control_against_WT_vs_Control	enriched no hit	hit x - hit y
RPS29A	1.29369	WT_vs_Control	enriched hit	1.7639	MUT_vs_Control	enriched hit	MUT_vs_Control_against_WT_vs_Control	enriched no hit	hit x - hit y
RAS2	1.21779	WT_vs_Control	enriched hit	1.1035	MUT_vs_Control	enriched hit	MUT_vs_Control_against_WT_vs_Control	enriched no hit	hit x - hit y
TPS2	1.32031	WT_vs_Control	enriched hit	1.67135	MUT_vs_Control	enriched hit	MUT_vs_Control_against_WT_vs_Control	enriched no hit	hit x - hit y
YJR005C-A	2.18055	WT_vs_Control	enriched hit	2.48356	MUT_vs_Control	enriched hit	MUT_vs_Control_against_WT_vs_Control	enriched no hit	hit x - hit y
GDH1	1.09086	WT_vs_Control	enriched hit	1.43011	MUT_vs_Control	enriched hit	MUT_vs_Control_against_WT_vs_Control	enriched no hit	hit x - hit y
RGI2	3.124	WT_vs_Control	enriched hit	4.01447	MUT_vs_Control	enriched hit	MUT_vs_Control_against_WT_vs_Control	enriched no hit	hit x - hit y
TUF1	1.06966	WT_vs_Control	enriched hit	1.18637	MUT_vs_Control	enriched hit	MUT_vs_Control_against_WT_vs_Control	enriched no hit	hit x - hit y
GND1	1.25475	WT_vs_Control	enriched hit	1.80784	MUT_vs_Control	enriched hit	MUT_vs_Control_against_WT_vs_Control	enriched no hit	hit x - hit y
YNL115C	1.17882	WT_vs_Control	enriched hit	1.61621	MUT_vs_Control	enriched hit	MUT_vs_Control_against_WT_vs_Control	enriched no hit	hit x - hit y
SEC53	1.03494	WT_vs_Control	enriched hit	1.53849	MUT_vs_Control	enriched hit	MUT_vs_Control_against_WT_vs_Control	enriched no hit	hit x - hit y
SSC1	1.75551	WT_vs_Control	enriched hit	1.7685	MUT_vs_Control	enriched hit	MUT_vs_Control_against_WT_vs_Control	enriched no hit	hit x - hit y
DIS3	1.18449	WT_vs_Control	enriched hit	1.42077	MUT_vs_Control	enriched hit	MUT_vs_Control_against_WT_vs_Control	enriched no hit	hit x - hit y
SRP54	1.60389	WT_vs_Control	enriched hit	1.91162	MUT_vs_Control	enriched hit	MUT_vs_Control_against_WT_vs_Control	enriched no hit	hit x - hit y
CDS1	2.3165	WT_vs_Control	enriched hit	2.15128	MUT_vs_Control	enriched hit	MUT_vs_Control_against_WT_vs_Control	enriched no hit	hit x - hit y
SUP45	1.57855	WT_vs_Control	enriched hit	1.44069	MUT_vs_Control	enriched hit	MUT_vs_Control_against_WT_vs_Control	enriched no hit	hit x - hit y
PUF6	2.32494	WT_vs_Control	enriched hit	2.24272	MUT_vs_Control	enriched hit	MUT_vs_Control_against_WT_vs_Control	enriched no hit	hit x - hit y
MRPL40	1.33279	WT_vs_Control	enriched hit	1.92345	MUT_vs_Control	enriched hit	MUT_vs_Control_against_WT_vs_Control	enriched no hit	hit x - hit y
SPT6	1.88236	WT_vs_Control	enriched hit	2.68647	MUT_vs_Control	enriched hit	MUT_vs_Control_against_WT_vs_Control	enriched no hit	hit x - hit y
TSA1	1.43599	WT_vs_Control	enriched hit	1.98174	MUT_vs_Control	enriched hit	MUT_vs_Control_against_WT_vs_Control	enriched no hit	hit x - hit y
PDB1	0.983641	WT_vs_Control	enriched candidate	1.40084	MUT_vs_Control	enriched hit	MUT_vs_Control_against_WT_vs_Control	enriched no hit	candidate x - hit y
PDR16	1.08129	WT_vs_Control	enriched hit	0.731	MUT_vs_Control	enriched candidate	MUT_vs_Control_against_WT_vs_Control	enriched no hit	hit x - candidate y
MSH2	1.56601	WT_vs_Control	enriched hit	0.869743	MUT_vs_Control	enriched candidate	MUT_vs_Control_against_WT_vs_Control	enriched no hit	hit x - candidate y
RRF1	2.1033	WT_vs_Control	enriched hit	2.89759	MUT_vs_Control	enriched hit	MUT_vs_Control_against_WT_vs_Control	enriched no hit	hit x - hit y
KRS1	1.72033	WT_vs_Control	enriched hit	1.55228	MUT_vs_Control	enriched hit	MUT_vs_Control_against_WT_vs_Control	enriched no hit	hit x - hit y
HIR1	1.88637	WT_vs_Control	enriched hit	1.06082	MUT_vs_Control	enriched candidate	MUT_vs_Control_against_WT_vs_Control	enriched no hit	hit x - candidate y
GSY1	1.713	WT_vs_Control	enriched hit	2.21647	MUT_vs_Control	enriched hit	MUT_vs_Control_against_WT_vs_Control	enriched no hit	hit x - hit y
IMG2	0.957557	WT_vs_Control	enriched candidate	1.9141	MUT_vs_Control	enriched hit	MUT_vs_Control_against_WT_vs_Control	enriched candidate	candidate x - hit y
PET10	1.79005	WT_vs_Control	enriched hit	1.62501	MUT_vs_Control	enriched hit	MUT_vs_Control_against_WT_vs_Control	enriched no hit	hit x - hit y
DMC1	1.5589	WT_vs_Control	enriched hit	1.88018	MUT_vs_Control	enriched hit	MUT_vs_Control_against_WT_vs_Control	enriched no hit	hit x - hit y
ACS2	1.2336	WT_vs_Control	enriched hit	1.50915	MUT_vs_Control	enriched hit	MUT_vs_Control_against_WT_vs_Control	enriched no hit	hit x - hit y
TGS1	1.91414	WT_vs_Control	enriched hit	2.10115	MUT_vs_Control	enriched hit	MUT_vs_Control_against_WT_vs_Control	enriched no hit	hit x - hit y
ATP3	1.22942	WT_vs_Control	enriched hit	1.86946	MUT_vs_Control	enriched hit	MUT_vs_Control_against_WT_vs_Control	enriched no hit	hit x - hit y
PIN2	-2.97442	WT_vs_Control	no hit	-3.74035	MUT_vs_Control	no hit	MUT_vs_Control_against_WT_vs_Control	no hit	no hit x - no hit y
RLP7	1.33912	WT_vs_Control	enriched hit	1.25797	MUT_vs_Control	enriched hit	MUT_vs_Control_against_WT_vs_Control	enriched no hit	hit x - hit y
YPT1	1.3156	WT_vs_Control	enriched hit	1.44269	MUT_vs_Control	enriched hit	MUT_vs_Control_against_WT_vs_Control	enriched no hit	hit x - hit y
SNF1	0.900969	WT_vs_Control	enriched candidate	2.85175	MUT_vs_Control	enriched hit	MUT_vs_Control_against_WT_vs_Control	enriched hit	candidate x - hit y
IST1	1.19772	WT_vs_Control	enriched hit	1.40207	MUT_vs_Control	enriched hit	MUT_vs_Control_against_WT_vs_Control	enriched no hit	hit x - hit y
EHT1	1.73684	WT_vs_Control	enriched hit	1.42812	MUT_vs_Control	enriched hit	MUT_vs_Control_against_WT_vs_Control	enriched no hit	hit x - hit y
SSA1	1.08026	WT_vs_Control	enriched hit	1.10874	MUT_vs_Control	enriched hit	MUT_vs_Control_against_WT_vs_Control	enriched no hit	hit x - hit y
NCE102	0.81597	WT_vs_Control	enriched candidate	0.814305	MUT_vs_Control	enriched candidate	MUT_vs_Control_against_WT_vs_Control	enriched no hit	candidate x - candidate y
SHE10	2.38641	WT_vs_Control	enriched hit	1.21844	MUT_vs_Control	enriched candidate	MUT_vs_Control_against_WT_vs_Control	enriched no hit	hit x - candidate y
SPA2	-2.83639	WT_vs_Control	no hit	-1.7163	MUT_vs_Control	no hit	MUT_vs_Control_against_WT_vs_Control	no hit	no hit x - no hit y
TED1	2.40767	WT_vs_Control	enriched hit	1.95786	MUT_vs_Control	enriched hit	MUT_vs_Control_against_WT_vs_Control	enriched no hit	hit x - hit y
RPS0A	0.899353	WT_vs_Control	enriched candidate	1.35276	MUT_vs_Control	enriched hit	MUT_vs_Control_against_WT_vs_Control	enriched no hit	candidate x - hit y
RPL10	1.74378	WT_vs_Control	enriched hit	2.24472	MUT_vs_Control	enriched hit	MUT_vs_Control_against_WT_vs_Control	enriched no hit	hit x - hit y
CPR1	1.10868	WT_vs_Control	enriched hit	2.21999	MUT_vs_Control	enriched hit	MUT_vs_Control_against_WT_vs_Control	enriched candidate	hit x - hit y
SAM2	1.24315	WT_vs_Control	enriched hit	1.45197	MUT_vs_Control	enriched hit	MUT_vs_Control_against_WT_vs_Control	enriched no hit	hit x - hit y
SPO14	0.824987	WT_vs_Control	enriched candidate	2.83781	MUT_vs_Control	enriched hit	MUT_vs_Control_against_WT_vs_Control	enriched hit	candidate x - hit y
IES1	1.37944	WT_vs_Control	enriched hit	1.21918	MUT_vs_Control	enriched hit	MUT_vs_Control_against_WT_vs_Control	enriched no hit	hit x - hit y
ATG8	0.93321	WT_vs_Control	enriched candidate	1.54427	MUT_vs_Control	enriched hit	MUT_vs_Control_against_WT_vs_Control	enriched no hit	candidate x - hit y
TDH1	1.10874	WT_vs_Control	enriched hit	1.99341	MUT_vs_Control	enriched hit	MUT_vs_Control_against_WT_vs_Control	enriched no hit	hit x - hit y
TPI1	0.723989	WT_vs_Control	enriched candidate	1.08664	MUT_vs_Control	enriched hit	MUT_vs_Control_against_WT_vs_Control	enriched no hit	candidate x - hit y
RPB4	1.03366	WT_vs_Control	enriched hit	0.693989	MUT_vs_Control	enriched candidate	MUT_vs_Control_against_WT_vs_Control	enriched no hit	hit x - candidate y
FKS1	-1.00215	WT_vs_Control	no hit	-0.899209	MUT_vs_Control	no hit	MUT_vs_Control_against_WT_vs_Control	no hit	no hit x - no hit y
TIM44	1.19935	WT_vs_Control	enriched hit	1.25105	MUT_vs_Control	enriched hit	MUT_vs_Control_against_WT_vs_Control	enriched no hit	hit x - hit y
ACF2	0.843107	WT_vs_Control	enriched candidate	2.2294	MUT_vs_Control	enriched hit	MUT_vs_Control_against_WT_vs_Control	enriched candidate	candidate x - hit y
PEA2	-1.75931	WT_vs_Control	no hit	-1.18179	MUT_vs_Control	no hit	MUT_vs_Control_against_WT_vs_Control	no hit	no hit x - no hit y
MRPL25	0.833161	WT_vs_Control	enriched candidate	1.60737	MUT_vs_Control	enriched hit	MUT_vs_Control_against_WT_vs_Control	enriched no hit	candidate x - hit y
GVP36	-2.13244	WT_vs_Control	no hit	-2.25555	MUT_vs_Control	no hit	MUT_vs_Control_against_WT_vs_Control	no hit	no hit x - no hit y
CYC1	0.651165	WT_vs_Control	enriched candidate	1.23942	MUT_vs_Control	enriched hit	MUT_vs_Control_against_WT_vs_Control	enriched no hit	candidate x - hit y
CRH1	0.705319	WT_vs_Control	enriched candidate	1.4032	MUT_vs_Control	enriched hit	MUT_vs_Control_against_WT_vs_Control	enriched no hit	candidate x - hit y
SSA3	1.32082	WT_vs_Control	enriched candidate	2.32668	MUT_vs_Control	enriched hit	MUT_vs_Control_against_WT_vs_Control	enriched no hit	candidate x - hit y
GPM1	0.898336	WT_vs_Control	enriched candidate	2.18064	MUT_vs_Control	enriched hit	MUT_vs_Control_against_WT_vs_Control	enriched candidate	candidate x - hit y
HSP150	0.63227	WT_vs_Control	enriched candidate	3.33196	MUT_vs_Control	enriched hit	MUT_vs_Control_against_WT_vs_Control	enriched hit	candidate x - hit y
RPS19A|RPS19B	1.00024	WT_vs_Control	enriched candidate	1.10488	MUT_vs_Control	enriched candidate	MUT_vs_Control_against_WT_vs_Control	enriched no hit	candidate x - candidate y
GAP1	-0.965515	WT_vs_Control	no hit	-0.538523	MUT_vs_Control	no hit	MUT_vs_Control_against_WT_vs_Control	no hit	no hit x - no hit y
ADO1	1.10271	WT_vs_Control	no hit	0.99451	MUT_vs_Control	no hit	MUT_vs_Control_against_WT_vs_Control	no hit	no hit x - no hit y
LSP1	0.867684	WT_vs_Control	no hit	1.61775	MUT_vs_Control	enriched hit	MUT_vs_Control_against_WT_vs_Control	enriched no hit	no hit x - hit y
FAS1	0.493864	WT_vs_Control	no hit	0.727741	MUT_vs_Control	enriched candidate	MUT_vs_Control_against_WT_vs_Control	enriched no hit	no hit x - candidate y
MBF1	0.324767	WT_vs_Control	no hit	1.23666	MUT_vs_Control	enriched hit	MUT_vs_Control_against_WT_vs_Control	enriched candidate	no hit x - hit y
SIS1	-0.316005	WT_vs_Control	no hit	0.711684	MUT_vs_Control	enriched candidate	MUT_vs_Control_against_WT_vs_Control	enriched candidate	no hit x - candidate y
FAS2	0.38815	WT_vs_Control	no hit	0.592605	MUT_vs_Control	no hit	MUT_vs_Control_against_WT_vs_Control	no hit	no hit x - no hit y
CAR1	0.246115	WT_vs_Control	no hit	1.10118	MUT_vs_Control	enriched hit	MUT_vs_Control_against_WT_vs_Control	enriched no hit	no hit x - hit y
RPL12A|RPL12B	0.169835	WT_vs_Control	no hit	2.09984	MUT_vs_Control	enriched hit	MUT_vs_Control_against_WT_vs_Control	enriched hit	no hit x - hit y
ASG1	0.383476	WT_vs_Control	no hit	0.360864	MUT_vs_Control	no hit	MUT_vs_Control_against_WT_vs_Control	no hit	no hit x - no hit y
VID30	0.293515	WT_vs_Control	no hit	0.745723	MUT_vs_Control	no hit	MUT_vs_Control_against_WT_vs_Control	no hit	no hit x - no hit y
ZEO1	0.105606	WT_vs_Control	no hit	-0.451838	MUT_vs_Control	no hit	MUT_vs_Control_against_WT_vs_Control	no hit	no hit x - no hit y
PET123	-0.103043	WT_vs_Control	no hit	0.46178	MUT_vs_Control	no hit	MUT_vs_Control_against_WT_vs_Control	no hit	no hit x - no hit y
INP52	0.147434	WT_vs_Control	no hit	0.556073	MUT_vs_Control	no hit	MUT_vs_Control_against_WT_vs_Control	no hit	no hit x - no hit y
RPL26B	-0.0657424	WT_vs_Control	no hit	0.454934	MUT_vs_Control	no hit	MUT_vs_Control_against_WT_vs_Control	no hit	no hit x - no hit y
SSO1	-0.0675052	WT_vs_Control	no hit	0.148484	MUT_vs_Control	no hit	MUT_vs_Control_against_WT_vs_Control	no hit	no hit x - no hit y
ATP5	-0.0794713	WT_vs_Control	no hit	0.910535	MUT_vs_Control	enriched candidate	MUT_vs_Control_against_WT_vs_Control	enriched no hit	no hit x - candidate y
