# Supplementary material for: Novel mechanistic insights into the role of Mer2 as the keystone of meiotic DNA break formation
Source: eLife journal article supplement (doi:10.7554/elife.72330), 2021-12-24
Supplement: data2 [file Full_dataset_V1.xlsx]

## Sheet: Full_dataset_V1
gene_name	protein_id	description	found.in.files	found.in.file_fractionated_merged_results_20210825_1637_proteins.txt	found.in.conditions	found.in.reps	max.qupm	average.top3	signal_sum_Control_rep1	signal_sum_Control_rep2	signal_sum_Control_rep3	signal_sum_MUT_rep1	signal_sum_MUT_rep2	signal_sum_MUT_rep3	signal_sum_WT_rep1	signal_sum_WT_rep2	signal_sum_WT_rep3	batchcl_raw_signal_sum_Control_rep1	batchcl_raw_signal_sum_Control_rep2	batchcl_raw_signal_sum_Control_rep3	batchcl_raw_signal_sum_MUT_rep1	batchcl_raw_signal_sum_MUT_rep2	batchcl_raw_signal_sum_MUT_rep3	batchcl_raw_signal_sum_WT_rep1	batchcl_raw_signal_sum_WT_rep2	batchcl_raw_signal_sum_WT_rep3	norm_batchcl_raw_signal_sum_Control_rep1	norm_batchcl_raw_signal_sum_Control_rep2	norm_batchcl_raw_signal_sum_Control_rep3	norm_batchcl_raw_signal_sum_MUT_rep1	norm_batchcl_raw_signal_sum_MUT_rep2	norm_batchcl_raw_signal_sum_MUT_rep3	norm_batchcl_raw_signal_sum_WT_rep1	norm_batchcl_raw_signal_sum_WT_rep2	norm_batchcl_raw_signal_sum_WT_rep3	ctrl.ratio_Control_rep1	ctrl.ratio_Control_rep2	ctrl.ratio_Control_rep3	ctrl.ratio_MUT_rep1	ctrl.ratio_MUT_rep2	ctrl.ratio_MUT_rep3	ctrl.ratio_WT_rep1	ctrl.ratio_WT_rep2	ctrl.ratio_WT_rep3
PRO3	P32263	Pyrroline-5-carboxylate reductase OS=Saccharomyces cerevisiae (strain ATCC 204508 / S288c) GN=PRO3 PE=1 SV=1	1	1	3	3	3	5.62514	1434380	876329	748958	4174970	3715730	2575780	3387440	4627700	4529700	1.2638e+06	852550	873756	3.67848e+06	3.6149e+06	3.00498e+06	2.9846e+06	4.50213e+06	5.28448e+06	1.13449e+06	966305	858768	3.1948e+06	3.63603e+06	4.64167e+06	3.87715e+06	3.96793e+06	3.42051e+06	1	1	1	2.81608	3.76282	5.40503	3.41754	4.10629	3.98305
VPS17	P32913	Vacuolar protein sorting-associated protein 17 OS=Saccharomyces cerevisiae (strain ATCC 204508 / S288c) GN=VPS17 PE=1 SV=2	1	1	3	3	3	5.7104	1135670	2271990	1028360	5493720	8356920	2886740	3172190	6492930	5878260	1.37229e+06	1.49209e+06	1.29588e+06	6.63834e+06	5.48826e+06	3.6377e+06	3.83312e+06	4.26411e+06	7.40743e+06	1.23187e+06	1.69118e+06	1.27365e+06	5.76548e+06	5.52033e+06	5.619e+06	4.97941e+06	3.75816e+06	4.79465e+06	1	1	1	4.68026	3.26419	4.41173	4.04215	2.22222	3.7645
CDC19	P00549	Pyruvate kinase 1 OS=Saccharomyces cerevisiae (strain ATCC 204508 / S288c) GN=CDC19 PE=1 SV=2	1	1	3	3	12	7.41103	12621400	9748320	9529950	55706600	41066600	27412500	32300700	42642000	47824700	1.14418e+07	9.71945e+06	1.05436e+07	5.05004e+07	4.0945e+07	3.03283e+07	2.9282e+07	4.25157e+07	5.29118e+07	1.02711e+07	1.10163e+07	1.03628e+07	4.38602e+07	4.11842e+07	4.68469e+07	3.80387e+07	3.7471e+07	3.42485e+07	1	1	1	4.27027	3.73848	4.52069	3.70348	3.40142	3.30495
ULS1	Q08562	ATP-dependent helicase ULS1 OS=Saccharomyces cerevisiae (strain ATCC 204508 / S288c) GN=ULS1 PE=1 SV=1	1	1	3	3	3	5.84878	1258630	2421110	1060390	5842520	7583530	2451010	8179230	10411500	10999200	1.31766e+06	1.72395e+06	1.4225e+06	6.11654e+06	5.39984e+06	3.28799e+06	8.56284e+06	7.41349e+06	1.47552e+07	1.18283e+06	1.95397e+06	1.39809e+06	5.31229e+06	5.43139e+06	5.07882e+06	1.11236e+07	6.53385e+06	9.5507e+06	1	1	1	4.49115	2.77967	3.63267	9.40416	3.34388	6.83123
MGM101	P32787	Mitochondrial genome maintenance protein MGM101 OS=Saccharomyces cerevisiae (strain ATCC 204508 / S288c) GN=MGM101 PE=1 SV=1	1	1	3	3	4	6.87243	2904860	1656300	1209690	16679600	18239300	5760290	23496000	25538500	25234400	2.26058e+06	1.46742e+06	1.75455e+06	1.29801e+07	1.61593e+07	8.3548e+06	1.82847e+07	2.26261e+07	3.66003e+07	2.02927e+06	1.66321e+06	1.72445e+06	1.12734e+07	1.62537e+07	1.29053e+07	2.37527e+07	1.99414e+07	2.36905e+07	1	1	1	5.55541	9.77249	7.48371	11.7051	11.9897	13.738
SWR1	Q05471	Helicase SWR1 OS=Saccharomyces cerevisiae (strain ATCC 204508 / S288c) GN=SWR1 PE=1 SV=1	1	1	3	3	4	5.75397	431375	652359	93746	4341310	3319170	785833	3946210	4680250	6319860	328613	447308	179475	3.30712e+06	2.27588e+06	1.50446e+06	3.00614e+06	3.20914e+06	1.20993e+07	294988	506991	176396	2.87227e+06	2.28918e+06	2.32388e+06	3.90513e+06	2.82836e+06	7.83155e+06	1	1	1	9.73692	4.51522	13.1742	13.2383	5.57872	44.3975
UTP5	Q04177	U3 small nucleolar RNA-associated protein 5 OS=Saccharomyces cerevisiae (strain ATCC 204508 / S288c) GN=UTP5 PE=1 SV=1	1	1	3	3	2	5.61862	1189580	1724240	1291400	7531090	5338240	2060560	3880450	7681300	5444150	1.16791e+06	1.33613e+06	1.69744e+06	7.3939e+06	4.13664e+06	2.70844e+06	3.80976e+06	5.9523e+06	7.15591e+06	1.04841e+06	1.5144e+06	1.66833e+06	6.42169e+06	4.16081e+06	4.18362e+06	4.94907e+06	5.24603e+06	4.63184e+06	1	1	1	6.1252	2.74749	2.50768	4.72057	3.46409	2.77634
RTT106	P40161	Histone chaperone RTT106 OS=Saccharomyces cerevisiae (strain ATCC 204508 / S288c) GN=RTT106 PE=1 SV=1	1	1	3	3	8	7.06473	419999	1388180	1236560	15451200	28364700	4058890	47671500	104621000	39749300	533347	743732	1.81753e+06	1.96211e+07	1.51967e+07	5.96588e+06	6.0537e+07	5.60518e+07	5.84248e+07	478774	842968	1.78636e+06	1.70412e+07	1.52855e+07	9.21525e+06	7.86405e+07	4.9401e+07	3.78169e+07	1	1	1	35.5934	18.1329	5.15868	164.254	58.6037	21.1699
RIO2	P40160	Serine/threonine-protein kinase RIO2 OS=Saccharomyces cerevisiae (strain ATCC 204508 / S288c) GN=RIO2 PE=1 SV=1	1	1	3	3	2	6.04239	778371	1111260	1057130	5942110	7256260	2517640	4226470	4511820	5929220	814385	945222	1.18786e+06	6.21704e+06	6.17207e+06	2.82899e+06	4.42202e+06	3.83769e+06	6.66248e+06	731055	1.07134e+06	1.16749e+06	5.39958e+06	6.20814e+06	4.36983e+06	5.74443e+06	3.38233e+06	4.31246e+06	1	1	1	7.38601	5.79473	3.74293	7.85773	3.1571	3.6938
KRS1	P15180	Lysine--tRNA ligase, cytoplasmic OS=Saccharomyces cerevisiae (strain ATCC 204508 / S288c) GN=KRS1 PE=1 SV=2	1	1	3	3	3	6.1756	1572590	5863550	3217060	10918600	10623100	4781120	9490430	12572900	12002300	1.89841e+06	4.19445e+06	3.72539e+06	1.31808e+07	7.59916e+06	5.53658e+06	1.14567e+07	8.99393e+06	1.38988e+07	1.70416e+06	4.75411e+06	3.66148e+06	1.14477e+07	7.64356e+06	8.55213e+06	1.48828e+07	7.92677e+06	8.99634e+06	1	1	1	6.71749	1.60778	2.3357	8.73326	1.66735	2.45702
RPC10	P40422	DNA-directed RNA polymerases I, II, and III subunit RPABC4 OS=Saccharomyces cerevisiae (strain ATCC 204508 / S288c) GN=RPC10 PE=1 SV=1	1	1	3	3	2	5.90254	227585	176126	814419	2576150	3536930	790801	5905690	6909180	4032650	225822	162536	889402	2.5562e+06	3.26402e+06	863609	5.85995e+06	6.37607e+06	4.40393e+06	202716	184223	874145	2.22009e+06	3.28309e+06	1.33398e+06	7.61237e+06	5.61952e+06	2.85056e+06	1	1	1	10.9517	17.8213	1.52604	37.552	30.5039	3.26097
YEF3	P16521	Elongation factor 3A OS=Saccharomyces cerevisiae (strain ATCC 204508 / S288c) GN=YEF3 PE=1 SV=4	1	1	3	3	5	6.67971	2199230	1625890	1426890	13529600	11605200	6623790	9964890	17377300	15644300	2.0585e+06	1.47165e+06	1.68421e+06	1.26638e+07	1.05043e+07	7.81829e+06	9.32723e+06	1.57288e+07	1.84655e+07	1.84787e+06	1.66802e+06	1.65532e+06	1.09987e+07	1.05657e+07	1.20766e+07	1.21165e+07	1.38625e+07	1.19523e+07	1	1	1	5.9521	6.33428	7.29563	6.55704	8.31081	7.22053
CMR1	Q12510	DNA damage-binding protein CMR1 OS=Saccharomyces cerevisiae (strain ATCC 204508 / S288c) GN=CMR1 PE=1 SV=1	1	1	3	3	6	6.63331	903730	1276490	1257910	18944400	16650800	3038160	23430800	40332200	29115800	852714	935081	1.81992e+06	1.7875e+07	1.21974e+07	4.39556e+06	2.21081e+07	2.9545e+07	4.21243e+07	765461	1.05985e+06	1.78871e+06	1.55246e+07	1.22687e+07	6.78964e+06	2.87195e+07	2.60394e+07	2.7266e+07	1	1	1	20.2814	11.5759	3.79584	37.5193	24.5689	15.2434
NOT5	Q12514	General negative regulator of transcription subunit 5 OS=Saccharomyces cerevisiae (strain ATCC 204508 / S288c) GN=NOT5 PE=1 SV=1	1	1	3	3	4	6.12979	20968900	9615980	6713790	3258030	2152530	2953150	1946620	3130270	3564060	1.80453e+07	1.05167e+07	7.13336e+06	2.80378e+06	2.35415e+06	3.13771e+06	1.67521e+06	3.42347e+06	3.78679e+06	1.61989e+07	1.19199e+07	7.011e+06	2.43512e+06	2.3679e+06	4.84668e+06	2.17619e+06	3.01726e+06	2.4511e+06	1	1	1	0.150326	0.198651	0.691297	0.134342	0.253128	0.349608
MDM38	Q08179	Mitochondrial distribution and morphology protein 38 OS=Saccharomyces cerevisiae (strain ATCC 204508 / S288c) GN=MDM38 PE=1 SV=1	1	1	3	3	2	5.76009	2222560	2009370	1405840	10242200	8588010	3713300	4999850	8029180	7486210	2.01726e+06	1.70803e+06	1.82219e+06	9.29612e+06	7.30008e+06	4.81301e+06	4.53801e+06	6.82505e+06	9.70329e+06	1.81085e+06	1.93593e+06	1.79093e+06	8.07379e+06	7.34273e+06	7.43446e+06	5.8951e+06	6.01523e+06	6.2807e+06	1	1	1	4.45857	3.79288	4.15117	3.25544	3.10716	3.50695
TPS1	Q00764	Alpha,alpha-trehalose-phosphate synthase [UDP-forming] 56 kDa subunit OS=Saccharomyces cerevisiae (strain ATCC 204508 / S288c) GN=TPS1 PE=1 SV=2	1	1	3	3	3	6.35203	2295700	1854400	1269350	9426910	8003110	4391740	5859320	8205060	10327000	2.09342e+06	1.71399e+06	1.50604e+06	8.59628e+06	7.39712e+06	5.21064e+06	5.34304e+06	7.58378e+06	1.22526e+07	1.87922e+06	1.94268e+06	1.4802e+06	7.46598e+06	7.44035e+06	8.04866e+06	6.94088e+06	6.68393e+06	7.93082e+06	1	1	1	3.97292	3.82993	5.43754	3.6935	3.44057	5.35792
NOP7	P53261	Pescadillo homolog OS=Saccharomyces cerevisiae (strain ATCC 204508 / S288c) GN=NOP7 PE=1 SV=1	1	1	3	3	5	6.47535	2783150	2382820	1826400	25166700	25392400	5196860	11310700	17770800	16550700	2.40546e+06	1.8601e+06	2.70701e+06	2.17514e+07	1.9822e+07	7.70256e+06	9.77576e+06	1.38724e+07	2.45307e+07	2.15932e+06	2.10829e+06	2.66058e+06	1.88914e+07	1.99379e+07	1.18978e+07	1.26992e+07	1.22264e+07	1.58781e+07	1	1	1	8.74874	9.45689	4.4719	5.8811	5.7992	5.96794
ERG20	P08524	Farnesyl pyrophosphate synthase OS=Saccharomyces cerevisiae (strain ATCC 204508 / S288c) GN=ERG20 PE=1 SV=2	1	1	3	3	2	6.05916	578262	526165	361940	2355710	2128890	1492160	2073400	2697340	3596830	558877	497225	396291	2.27674e+06	2.0118e+06	1.63378e+06	2.00389e+06	2.54898e+06	3.9382e+06	501691	563570	389493	1.97738e+06	2.02355e+06	2.52363e+06	2.60316e+06	2.24654e+06	2.5491e+06	1	1	1	3.94142	3.5906	6.47926	5.18877	3.98626	6.54466
TMA64	Q04600	Translation machinery-associated protein 64 OS=Saccharomyces cerevisiae (strain ATCC 204508 / S288c) GN=TMA64 PE=1 SV=1	1	1	3	3	3	5.88874	2104220	1550170	1356500	7718090	8628150	3247820	6113480	12496000	10293500	2.04366e+06	1.26562e+06	1.71071e+06	7.49597e+06	7.04438e+06	4.09589e+06	5.93754e+06	1.02023e+07	1.29813e+07	1.83455e+06	1.4345e+06	1.68136e+06	6.51034e+06	7.08555e+06	6.32675e+06	7.71316e+06	8.99172e+06	8.4025e+06	1	1	1	3.54874	4.9394	3.76287	4.20439	6.26821	4.99743
ARG1	P22768	Argininosuccinate synthase OS=Saccharomyces cerevisiae (strain ATCC 204508 / S288c) GN=ARG1 PE=1 SV=3	1	1	3	3	4	6.50048	4152610	2974310	2128440	11331400	8603460	4229710	12768500	9437080	22514900	3.32586e+06	3.22789e+06	2.44876e+06	9.07542e+06	9.33696e+06	4.86625e+06	1.02264e+07	1.02417e+07	2.59032e+07	2.98555e+06	3.65859e+06	2.40675e+06	7.88211e+06	9.39152e+06	7.5167e+06	1.32846e+07	9.02644e+06	1.67665e+07	1	1	1	2.64009	2.56698	3.12317	4.44964	2.46719	6.96646
CDC24	P11433	Cell division control protein 24 OS=Saccharomyces cerevisiae (strain ATCC 204508 / S288c) GN=CDC24 PE=1 SV=2	1	1	3	3	2	5.42623	411939	221497	99035.7	2173350	1904290	1093880	828166	2177880	1451410	355088	177768	143154	1.87341e+06	1.52833e+06	1.58118e+06	713872	1.74791e+06	2.09799e+06	318754	201487	140699	1.62708e+06	1.53726e+06	2.44239e+06	927355	1.54051e+06	1.35797e+06	1	1	1	5.10449	7.62959	17.359	2.90931	7.64571	9.65166
GRS1	P38088-2	Isoform Cytoplasmic of Glycine--tRNA ligase 1, mitochondrial OS=Saccharomyces cerevisiae (strain ATCC 204508 / S288c) GN=GRS1	1	1	3	3	11	6.53678	8617060	6449750	4878180	29438800	29440900	17162100	22916500	37333800	36456700	8.20053e+06	5.74517e+06	5.75459e+06	2.80158e+07	2.62247e+07	2.02454e+07	2.18088e+07	3.32554e+07	4.30065e+07	7.36143e+06	6.51175e+06	5.65588e+06	2.43321e+07	2.6378e+07	3.12723e+07	2.83307e+07	2.93095e+07	2.78371e+07	1	1	1	3.30534	4.05083	5.52916	3.84853	4.50102	4.92179
IMD4	P50094	Inosine-5'-monophosphate dehydrogenase 4 OS=Saccharomyces cerevisiae (strain ATCC 204508 / S288c) GN=IMD4 PE=1 SV=1	1	1	3	3	3	6.03276	1082490	656176	469380	4906320	4090280	3237310	2534600	4337990	4793480	994911	632980	529413	4.50937e+06	3.94569e+06	3.65136e+06	2.32954e+06	4.18464e+06	5.40656e+06	893109	717438	520332	3.91645e+06	3.96874e+06	5.6401e+06	3.02619e+06	3.68812e+06	3.49953e+06	1	1	1	4.38518	5.53183	10.8394	3.38837	5.14068	6.72558
PET10	P36139	Protein PET10 OS=Saccharomyces cerevisiae (strain ATCC 204508 / S288c) GN=PET10 PE=1 SV=3	1	1	3	3	4	5.87229	2428360	2899020	570481	4456320	5986170	3273920	4893680	6592200	6947840	2.26265e+06	2.08955e+06	849443	4.15222e+06	4.31471e+06	4.87485e+06	4.55974e+06	4.75152e+06	1.03453e+07	2.03113e+06	2.36836e+06	834872	3.60626e+06	4.33992e+06	7.52997e+06	5.92333e+06	4.18774e+06	6.69626e+06	1	1	1	1.77549	1.83246	9.01932	2.91627	1.7682	8.0207
CBF1	P17106	Centromere-binding protein 1 OS=Saccharomyces cerevisiae (strain ATCC 204508 / S288c) GN=CBF1 PE=1 SV=2	1	1	3	3	5	6.44167	3029210	2116720	1149930	9777240	9498440	1496530	9592240	19999800	14575600	2.40421e+06	1.49629e+06	2.04963e+06	7.75997e+06	6.71435e+06	2.66741e+06	7.61314e+06	1.41377e+07	2.59795e+07	2.15821e+06	1.69594e+06	2.01447e+06	6.73963e+06	6.75359e+06	4.12024e+06	9.88985e+06	1.24602e+07	1.68159e+07	1	1	1	3.12279	3.98222	2.04532	4.58244	7.34707	8.34754
SAH1	P39954	Adenosylhomocysteinase OS=Saccharomyces cerevisiae (strain ATCC 204508 / S288c) GN=SAH1 PE=1 SV=1	1	1	3	3	2	6.00412	644007	314544	431043	2763590	3075190	1286690	3204100	3176760	3732350	537223	322445	504060	2.30535e+06	3.15244e+06	1.50465e+06	2.67282e+06	3.25656e+06	4.36459e+06	482252	365469	495413	2.00223e+06	3.17086e+06	2.32417e+06	3.47213e+06	2.87016e+06	2.8251e+06	1	1	1	4.15182	8.67614	4.69138	7.19981	7.85335	5.7025
RPH1	P39956	DNA damage-responsive transcriptional repressor RPH1 OS=Saccharomyces cerevisiae (strain ATCC 204508 / S288c) GN=RPH1 PE=1 SV=1	1	1	3	3	2	5.79441	199825	317982	313577	2899750	3360780	548586	3430650	6273560	5379220	210095	222935	425405	3.04878e+06	2.35622e+06	744223	3.60697e+06	4.39835e+06	7.29756e+06	188597	252681	418108	2.6479e+06	2.36999e+06	1.14957e+06	4.68563e+06	3.87647e+06	4.72353e+06	1	1	1	14.04	9.37937	2.74946	24.8446	15.3413	11.2974
HTB1	P02293	Histone H2B.1 OS=Saccharomyces cerevisiae (strain ATCC 204508 / S288c) GN=HTB1 PE=1 SV=2	1	1	3	3	2	6.85399	2428930	3030590	2712780	43471100	45138400	4316760	96215100	128541000	112854000	2.05811e+06	2.13876e+06	4.53654e+06	3.68345e+07	3.18553e+07	7.21886e+06	8.15262e+07	9.07146e+07	1.88724e+08	1.84752e+06	2.42414e+06	4.45872e+06	3.19912e+07	3.20414e+07	1.11507e+07	1.05907e+08	7.99509e+07	1.22157e+08	1	1	1	17.3158	13.2177	2.50086	57.3237	32.9812	27.3972
HTB2	P02294	Histone H2B.2 OS=Saccharomyces cerevisiae (strain ATCC 204508 / S288c) GN=HTB2 PE=1 SV=2	1	1	3	3	2	7.46246	3178610	5197200	3855540	61444300	67216500	7972830	117197000	210651000	155985000	3.04202e+06	3.37005e+06	6.2129e+06	5.88039e+07	4.35855e+07	1.28476e+07	1.12161e+08	1.36593e+08	2.51358e+08	2.73075e+06	3.81971e+06	6.10633e+06	5.10719e+07	4.38402e+07	1.98451e+07	1.45702e+08	1.20386e+08	1.62698e+08	1	1	1	18.7025	11.4774	3.24993	53.3562	31.5171	26.6441
VAS1	P07806|P07806-2	Valine--tRNA ligase, mitochondrial OS=Saccharomyces cerevisiae (strain ATCC 204508 / S288c) GN=VAS1 PE=1 SV=2|Isoform Cytoplasmic of Valine--tRNA ligase, mitochondrial OS=Saccharomyces cerevisiae (strain ATCC 204508 / S288c) GN=VAS1	1	1	3	3	7	6.18446	4345780	3365970	3369020	13235500	13278100	5506530	12689200	15482400	17253000	3.94201e+06	3.10799e+06	4.0224e+06	1.20058e+07	1.22604e+07	6.57445e+06	1.15102e+07	1.42958e+07	2.0599e+07	3.53865e+06	3.52268e+06	3.9534e+06	1.04272e+07	1.2332e+07	1.01553e+07	1.49524e+07	1.25995e+07	1.33332e+07	1	1	1	2.94665	3.50075	2.56875	4.22544	3.57668	3.3726
HFD1	Q04458	Fatty aldehyde dehydrogenase HFD1 OS=Saccharomyces cerevisiae (strain ATCC 204508 / S288c) GN=HFD1 PE=1 SV=1	1	1	3	3	3	6.23617	1031190	756601	747195	8083420	6967130	3803830	6127270	11712700	8113970	964103	664038	910590	7.55753e+06	6.11477e+06	4.63565e+06	5.72865e+06	1.02798e+07	9.88832e+06	865453	752640	894970	6.56381e+06	6.1505e+06	7.16049e+06	7.4418e+06	9.06003e+06	6.40047e+06	1	1	1	7.58424	8.1719	8.00081	8.59873	12.0377	7.1516
YNR021W	P53723	UPF0674 endoplasmic reticulum membrane protein YNR021W OS=Saccharomyces cerevisiae (strain ATCC 204508 / S288c) GN=YNR021W PE=1 SV=3	1	1	3	3	2	5.96513	1694260	3377400	1160750	9237450	9467000	3670350	9723940	13724500	11940700	1.68735e+06	2.3632e+06	1.6657e+06	9.19976e+06	6.62416e+06	5.26702e+06	9.68426e+06	9.60318e+06	1.71351e+07	1.51469e+06	2.67852e+06	1.63712e+06	7.9901e+06	6.66287e+06	8.13574e+06	1.25803e+07	8.46373e+06	1.10911e+07	1	1	1	5.27506	2.48752	4.96953	8.30554	3.15985	6.77477
YPT7	P32939	GTP-binding protein YPT7 OS=Saccharomyces cerevisiae (strain ATCC 204508 / S288c) GN=YPT7 PE=1 SV=1	1	1	3	3	2	5.90824	4130020	2572730	1832620	8054070	7212940	5293760	5457560	10607400	7409660	3.75971e+06	2.27971e+06	2.27188e+06	7.33192e+06	6.39143e+06	6.56261e+06	4.96822e+06	9.39928e+06	9.18567e+06	3.375e+06	2.58389e+06	2.23291e+06	6.36786e+06	6.42878e+06	1.0137e+07	6.45396e+06	8.28402e+06	5.94566e+06	1	1	1	1.88677	2.48802	4.53982	1.91228	3.20602	2.66274
YHR097C	P38809	Uncharacterized protein YHR097C OS=Saccharomyces cerevisiae (strain ATCC 204508 / S288c) GN=YHR097C PE=1 SV=1	1	1	3	3	3	5.85733	817545	899201	605735	12188500	9385780	4412180	4820070	5216420	5227390	705865	799230	789328	1.05235e+07	8.3423e+06	5.74947e+06	4.16163e+06	4.63647e+06	6.81177e+06	633639	905871	775788	9.13979e+06	8.39104e+06	8.88097e+06	5.40616e+06	4.08634e+06	4.40909e+06	1	1	1	14.4243	9.26295	11.4477	8.53193	4.51095	5.68337
RPT2	P40327	26S protease regulatory subunit 4 homolog OS=Saccharomyces cerevisiae (strain ATCC 204508 / S288c) GN=RPT2 PE=1 SV=3	1	1	3	3	4	6.16275	7382860	2411570	2235860	17884200	12226900	6104840	10578800	11386400	12597100	4.99287e+06	2.62302e+06	3.03961e+06	1.20947e+07	1.3299e+07	8.29941e+06	7.15422e+06	1.23848e+07	1.71255e+07	4.48198e+06	2.97301e+06	2.98746e+06	1.05044e+07	1.33767e+07	1.28197e+07	9.29368e+06	1.09153e+07	1.10849e+07	1	1	1	2.34369	4.49938	4.29118	2.07356	3.67146	3.71048
MKT1	P40850	Protein MKT1 OS=Saccharomyces cerevisiae (strain ATCC 204508 / S288c) GN=MKT1 PE=1 SV=2	1	1	3	3	5	6.01777	1364290	1622760	1740340	6222960	6137140	3039890	5677470	9866490	8895350	1.47272e+06	1.38153e+06	1.89372e+06	6.71754e+06	5.22482e+06	3.3078e+06	6.1287e+06	8.39978e+06	9.67931e+06	1.32203e+06	1.56586e+06	1.86123e+06	5.83427e+06	5.25535e+06	5.10942e+06	7.96149e+06	7.40311e+06	6.26518e+06	1	1	1	4.41312	3.3562	2.74518	6.02218	4.72781	3.36614
POM33	Q12164	Pore membrane protein of 33 kDa OS=Saccharomyces cerevisiae (strain ATCC 204508 / S288c) GN=POM33 PE=1 SV=1	1	1	3	3	2	6.18394	906231	1169370	478203	4445890	4028950	2791810	4058280	5898990	6139330	890251	962568	591370	4.36749e+06	3.31643e+06	3.45249e+06	3.98672e+06	4.85576e+06	7.59221e+06	799158	1.091e+06	581226	3.79322e+06	3.33581e+06	5.33292e+06	5.17895e+06	4.2796e+06	4.91425e+06	1	1	1	4.74652	3.05757	9.1753	6.48051	3.92263	8.45498
PSH1	Q12161	RING finger protein PSH1 OS=Saccharomyces cerevisiae (strain ATCC 204508 / S288c) GN=PSH1 PE=1 SV=1	1	1	3	3	3	5.95004	993740	869506	711856	8380190	7694480	2458980	6603500	9797310	7942510	869743	717747	985316	7.33452e+06	6.35152e+06	3.4036e+06	5.77953e+06	8.08734e+06	1.09936e+07	780748	813515	968414	6.37012e+06	6.38864e+06	5.2574e+06	7.50789e+06	7.12774e+06	7.11591e+06	1	1	1	8.159	7.85313	5.42887	9.61628	8.76166	7.348
ACF2	Q12168	Endo-1,3(4)-beta-glucanase 2 OS=Saccharomyces cerevisiae (strain ATCC 204508 / S288c) GN=ACF2 PE=1 SV=1	1	1	3	3	2	5.43146	723630	941953	927921	7473540	2964530	2181640	1569310	1750190	1793920	619332	969014	1.05391e+06	6.39637e+06	3.0497e+06	2.47785e+06	1.34312e+06	1.80047e+06	2.03749e+06	555960	1.09831e+06	1.03583e+06	5.55532e+06	3.06752e+06	3.82743e+06	1.74478e+06	1.58684e+06	1.31882e+06	1	1	1	9.9923	2.79295	3.69504	3.13833	1.4448	1.2732
RPL4A	P10664	60S ribosomal protein L4-A OS=Saccharomyces cerevisiae (strain ATCC 204508 / S288c) GN=RPL4A PE=1 SV=4	1	1	3	3	10	8.14041	11888700	10262900	9898240	154294000	158312000	31145300	85661700	101892000	105450000	1.00374e+07	8.51541e+06	1.41298e+07	1.30267e+08	1.31356e+08	4.44601e+07	7.23225e+07	8.45426e+07	1.5053e+08	9.01034e+06	9.65162e+06	1.38874e+07	1.13139e+08	1.32123e+08	6.86756e+07	9.39506e+07	7.45113e+07	9.74347e+07	1	1	1	12.5566	13.6893	4.94517	10.427	7.72008	7.01604
SSA1	P10591	Heat shock protein SSA1 OS=Saccharomyces cerevisiae (strain ATCC 204508 / S288c) GN=SSA1 PE=1 SV=4	1	1	3	3	3	6.11874	2361700	2355410	1014150	3643870	4164130	2763480	3017650	5381960	4430920	2.35426e+06	1.85355e+06	1.29281e+06	3.63239e+06	3.2769e+06	3.5228e+06	3.00815e+06	4.23525e+06	5.6484e+06	2.11337e+06	2.10087e+06	1.27063e+06	3.15478e+06	3.29605e+06	5.44152e+06	3.90773e+06	3.73272e+06	3.65607e+06	1	1	1	1.49277	1.56889	4.28254	1.84906	1.77675	2.87737
GDB1	Q06625	Glycogen debranching enzyme OS=Saccharomyces cerevisiae (strain ATCC 204508 / S288c) GN=GDB1 PE=1 SV=1	1	1	3	3	2	5.57801	1623590	1079970	950540	5069230	3782420	2272180	2873210	3915240	4128290	1.39488e+06	1.05703e+06	1.1304e+06	4.35515e+06	3.70208e+06	2.70212e+06	2.46847e+06	3.83208e+06	4.90944e+06	1.25215e+06	1.19807e+06	1.11101e+06	3.7825e+06	3.72372e+06	4.17385e+06	3.20667e+06	3.37739e+06	3.17776e+06	1	1	1	3.0208	3.10809	3.75681	2.56092	2.81902	2.86025
ZTA1	P38230	Probable quinone oxidoreductase OS=Saccharomyces cerevisiae (strain ATCC 204508 / S288c) GN=ZTA1 PE=1 SV=1	1	1	3	3	5	6.44127	5868720	3747010	2851790	16782700	17315200	10486800	15308400	28311300	26251300	5.57928e+06	3.33534e+06	3.36998e+06	1.5955e+07	1.54129e+07	1.23923e+07	1.45534e+07	2.52009e+07	3.10213e+07	5.00839e+06	3.78038e+06	3.31217e+06	1.38571e+07	1.55029e+07	1.91419e+07	1.89056e+07	2.22107e+07	2.00793e+07	1	1	1	2.76678	4.10089	5.77926	3.77478	5.87526	6.06229
OAF1	P39720	Oleate-activated transcription factor 1 OS=Saccharomyces cerevisiae (strain ATCC 204508 / S288c) GN=OAF1 PE=1 SV=3	1	1	3	3	3	6.14483	2817660	2448410	2012670	9966970	11051600	4268730	7333110	16987200	10719500	2.81708e+06	1.87312e+06	2.63137e+06	9.96492e+06	8.45484e+06	5.58094e+06	7.3316e+06	1.29958e+07	1.40147e+07	2.52883e+06	2.12304e+06	2.58623e+06	8.65466e+06	8.50425e+06	8.62065e+06	9.52412e+06	1.14538e+07	9.07136e+06	1	1	1	3.4224	4.00569	3.33329	3.76622	5.39498	3.50756
RBG1	P39729	Ribosome-interacting GTPase 1 OS=Saccharomyces cerevisiae (strain ATCC 204508 / S288c) GN=RBG1 PE=1 SV=1	1	1	3	3	4	5.98171	1915430	2808600	1146310	6086810	7105030	2528340	4125240	6494880	6351550	1.92202e+06	2.02523e+06	1.58425e+06	6.10777e+06	5.12332e+06	3.49428e+06	4.13944e+06	4.68335e+06	8.77812e+06	1.72536e+06	2.29546e+06	1.55707e+06	5.30467e+06	5.15326e+06	5.39746e+06	5.37734e+06	4.12765e+06	5.68186e+06	1	1	1	3.07453	2.24498	3.46641	3.11666	1.79818	3.64906
PRS1	P32895	Ribose-phosphate pyrophosphokinase 1 OS=Saccharomyces cerevisiae (strain ATCC 204508 / S288c) GN=PRS1 PE=1 SV=1	1	1	3	3	4	5.77004	707671	704428	776595	4230360	7800260	2479910	2198430	2900510	3705280	787793	583962	841522	4.70932e+06	6.46632e+06	2.68724e+06	2.44734e+06	2.40449e+06	4.01506e+06	707184	661880	827087	4.0901e+06	6.5041e+06	4.15087e+06	3.17921e+06	2.11919e+06	2.59885e+06	1	1	1	5.78365	9.82672	5.01866	4.49559	3.20177	3.14217
ERB1	Q04660	Ribosome biogenesis protein ERB1 OS=Saccharomyces cerevisiae (strain ATCC 204508 / S288c) GN=ERB1 PE=1 SV=1	1	1	3	3	5	6.03005	1371710	1944670	770403	14085600	14228300	4423420	5752990	8731580	8736770	1.29169e+06	1.41369e+06	1.12542e+06	1.32639e+07	1.03434e+07	6.46182e+06	5.41737e+06	6.34748e+06	1.27628e+07	1.15952e+06	1.60232e+06	1.10611e+06	1.15198e+07	1.04038e+07	9.9813e+06	7.03744e+06	5.59432e+06	8.26108e+06	1	1	1	9.93502	6.49296	9.02375	6.06928	3.49139	7.46856
HSP82	P02829	ATP-dependent molecular chaperone HSP82 OS=Saccharomyces cerevisiae (strain ATCC 204508 / S288c) GN=HSP82 PE=1 SV=1	1	1	3	3	2	6.17547	611346	548920	541364	6193810	4051210	3041250	3037410	4594440	5326100	585443	546824	567483	5.93138e+06	4.03574e+06	3.18798e+06	2.90872e+06	4.5769e+06	5.58307e+06	525539	619786	557749	5.15147e+06	4.05932e+06	4.92434e+06	3.77857e+06	4.03383e+06	3.61378e+06	1	1	1	9.80227	6.54955	8.82896	7.18989	6.50842	6.47923
RPN6	Q12377	26S proteasome regulatory subunit RPN6 OS=Saccharomyces cerevisiae (strain ATCC 204508 / S288c) GN=RPN6 PE=1 SV=3	1	1	3	3	2	5.75174	1169700	935147	642806	3533980	3264250	1847900	2499660	3688400	4089300	1.08591e+06	843668	767484	3.28082e+06	2.94493e+06	2.20632e+06	2.3206e+06	3.32759e+06	4.88246e+06	974795	956238	754319	2.84944e+06	2.96214e+06	3.40801e+06	3.01457e+06	2.93276e+06	3.1603e+06	1	1	1	2.92311	3.0977	4.51799	3.09252	3.06697	4.1896
ACC1	Q00955	Acetyl-CoA carboxylase OS=Saccharomyces cerevisiae (strain ATCC 204508 / S288c) GN=ACC1 PE=1 SV=2	1	1	3	3	5	6.06967	3094460	1867850	1685880	13743800	9928630	5578150	9297460	18055400	15059300	2.71027e+06	1.72919e+06	2.07921e+06	1.20374e+07	9.19156e+06	6.87959e+06	8.14314e+06	1.6715e+07	1.85728e+07	2.43295e+06	1.95991e+06	2.04355e+06	1.04547e+07	9.24527e+06	1.06266e+07	1.05783e+07	1.47317e+07	1.20217e+07	1	1	1	4.29712	4.71719	5.20008	4.34796	7.51653	5.88277
HttQx_EGFP	HttQx_EGFP	NA	1	1	3	3	2	6.02896	4537280	1084030	834084	6720720	2203780	1173440	6371310	4000550	2845640	2.02585e+06	1.32096e+06	1.53303e+06	3.00073e+06	2.68545e+06	2.15676e+06	2.84472e+06	4.87492e+06	5.23023e+06	1.81856e+06	1.49721e+06	1.50673e+06	2.60617e+06	2.70114e+06	3.33146e+06	3.69544e+06	4.29649e+06	3.3854e+06	1	1	1	1.4331	1.80411	2.21105	2.03207	2.86966	2.24685
PMA1	P05030	Plasma membrane ATPase 1 OS=Saccharomyces cerevisiae (strain ATCC 204508 / S288c) GN=PMA1 PE=1 SV=2	1	1	3	3	12	7.53497	10669700	7053290	5659930	74427000	57037800	29471400	37829700	68644100	58883900	9.33566e+06	6.34703e+06	7.18852e+06	6.51213e+07	5.13265e+07	3.74308e+07	3.30998e+07	6.17706e+07	7.47868e+07	8.38041e+06	7.19391e+06	7.06521e+06	5.65587e+07	5.16264e+07	5.78178e+07	4.29983e+07	5.44413e+07	4.84077e+07	1	1	1	6.74892	7.17641	8.18345	5.13082	7.56769	6.85156
ASG1	P40467	Activator of stress genes 1 OS=Saccharomyces cerevisiae (strain ATCC 204508 / S288c) GN=ASG1 PE=1 SV=1	1	1	3	3	3	5.9207	12017900	6243310	630173	4616900	4456040	3607100	3817510	7159240	5182130	8.65831e+06	4.59123e+06	1.18944e+06	3.32625e+06	3.2769e+06	6.80832e+06	2.75033e+06	5.26479e+06	9.78116e+06	7.77236e+06	5.20383e+06	1.16903e+06	2.88889e+06	3.29605e+06	1.05165e+07	3.57281e+06	4.6401e+06	6.3311e+06	1	1	1	0.371687	0.633388	8.99591	0.459682	0.89167	5.41567
ADE17	P38009	Bifunctional purine biosynthesis protein ADE17 OS=Saccharomyces cerevisiae (strain ATCC 204508 / S288c) GN=ADE17 PE=1 SV=2	1	1	3	3	5	6.30496	2513350	3329070	1854940	18856300	14575500	7767740	10460000	14371300	17850500	2.42693e+06	2.86897e+06	2.22906e+06	1.82079e+07	1.25611e+07	9.33442e+06	1.01003e+07	1.23851e+07	2.14508e+07	2.1786e+06	3.25178e+06	2.19083e+06	1.58138e+07	1.26345e+07	1.44185e+07	1.31208e+07	1.09156e+07	1.38846e+07	1	1	1	7.25871	3.88541	6.5813	6.02261	3.3568	6.33759
OLE1	P21147	Acyl-CoA desaturase 1 OS=Saccharomyces cerevisiae (strain ATCC 204508 / S288c) GN=OLE1 PE=1 SV=2	1	1	3	3	4	6.2089	1376910	1302550	933390	5000950	4772120	2025350	3529810	10406300	5375800	1.39335e+06	951155	1.26314e+06	5.06066e+06	3.48472e+06	2.74087e+06	3.57195e+06	7.59894e+06	7.27498e+06	1.25078e+06	1.07807e+06	1.24147e+06	4.39524e+06	3.50509e+06	4.23371e+06	4.64015e+06	6.6973e+06	4.70892e+06	1	1	1	3.51401	3.25127	3.41023	3.70981	6.21232	3.79301
CWP1	P28319	Cell wall protein CWP1 OS=Saccharomyces cerevisiae (strain ATCC 204508 / S288c) GN=CWP1 PE=1 SV=2	1	1	3	3	3	6.97067	3975430	3842070	2778200	117062000	32385100	25227100	10454600	11814200	14560200	2.92591e+06	4.21412e+06	3.44147e+06	8.61576e+07	3.55212e+07	3.12499e+07	7.69458e+06	1.29582e+07	1.80363e+07	2.62653e+06	4.77641e+06	3.38244e+06	7.48289e+07	3.57287e+07	4.82703e+07	9.99565e+06	1.14207e+07	1.16745e+07	1	1	1	28.4897	7.48025	14.2709	3.80565	2.39106	3.4515
SPB4	P25808	ATP-dependent rRNA helicase SPB4 OS=Saccharomyces cerevisiae (strain ATCC 204508 / S288c) GN=SPB4 PE=1 SV=1	1	1	3	3	2	5.49925	515925	260464	330841	2372030	2257600	1453800	1736930	2672590	2349540	465078	259662	368146	2.13826e+06	2.25065e+06	1.61773e+06	1.56575e+06	2.66436e+06	2.61447e+06	417490	294308	361830	1.8571e+06	2.2638e+06	2.49883e+06	2.03398e+06	2.34822e+06	1.69228e+06	1	1	1	4.44825	7.69193	6.90609	4.87194	7.97878	4.677
YNL040W	P53960	Putative alanyl-tRNA editing protein alaX OS=Saccharomyces cerevisiae (strain ATCC 204508 / S288c) GN=YNL040W PE=1 SV=1	1	1	3	3	2	5.80673	875538	1548030	762637	2570660	3116570	1365860	2396850	5249870	4067700	1.01216e+06	1.06874e+06	955550	2.97179e+06	2.15163e+06	1.71136e+06	2.77086e+06	3.62443e+06	5.09665e+06	908590	1.21134e+06	939158	2.58103e+06	2.16421e+06	2.64347e+06	3.59948e+06	3.19438e+06	3.29893e+06	1	1	1	2.8407	1.78663	2.81472	3.96161	2.63707	3.51265
CRZ1	P53968	Transcriptional regulator CRZ1 OS=Saccharomyces cerevisiae (strain ATCC 204508 / S288c) GN=CRZ1 PE=1 SV=1	1	1	3	3	2	6.65709	1139270	1158750	1473090	9248990	9361100	2028590	10784700	16674800	14472800	1.07755e+06	938680	1.92261e+06	8.74792e+06	7.58324e+06	2.64762e+06	1.02004e+07	1.35079e+07	1.88892e+07	967291	1.06393e+06	1.88963e+06	7.59768e+06	7.62755e+06	4.08967e+06	1.32509e+07	1.19052e+07	1.22265e+07	1	1	1	7.85459	7.16924	2.16427	13.6989	11.1898	6.47034
DUG1	P43616	Cys-Gly metallodipeptidase DUG1 OS=Saccharomyces cerevisiae (strain ATCC 204508 / S288c) GN=DUG1 PE=1 SV=1	1	1	3	3	2	5.45243	262094	227216	NA	929585	800979	418302	609819	1180880	1253260	263626	202084	NA	935020	712383	467591	613385	1.05026e+06	1.40093e+06	236651	229048	NA	812076	716546	722267	796817	925645	906789	1	1	NA	3.43153	3.12837	NA	3.36705	4.04128	NA
MVD1	P32377	Diphosphomevalonate decarboxylase OS=Saccharomyces cerevisiae (strain ATCC 204508 / S288c) GN=MVD1 PE=1 SV=2	1	1	3	3	3	5.8448	1167600	1320680	988492	6197250	5015610	2849640	3788890	4364280	5480090	1.10188e+06	1.22451e+06	1.12971e+06	5.84845e+06	4.65039e+06	3.25674e+06	3.57564e+06	4.04649e+06	6.26298e+06	989135	1.3879e+06	1.11033e+06	5.07945e+06	4.67756e+06	5.03055e+06	4.64493e+06	3.56635e+06	4.05387e+06	1	1	1	5.13524	3.37025	4.53068	4.69595	2.56961	3.65105
PUP2	P32379	Proteasome subunit alpha type-5 OS=Saccharomyces cerevisiae (strain ATCC 204508 / S288c) GN=PUP2 PE=1 SV=2	1	1	3	3	3	5.84491	1203260	1491490	817213	6345200	4616230	2797490	4281660	6375390	6391100	1.1369e+06	1.27737e+06	1.0099e+06	5.99525e+06	3.95352e+06	3.45708e+06	4.04552e+06	5.46013e+06	7.898e+06	1.02057e+06	1.44781e+06	992572	5.20695e+06	3.97662e+06	5.34001e+06	5.25533e+06	4.81227e+06	5.11218e+06	1	1	1	5.10201	2.74665	5.37997	5.14942	3.32383	5.15044
LSM12	P38828	Protein LSM12 OS=Saccharomyces cerevisiae (strain ATCC 204508 / S288c) GN=LSM12 PE=1 SV=1	1	1	3	3	4	5.93313	2322090	1759190	1840290	8047480	8646820	3030150	8316500	13643900	11101800	2.16482e+06	1.48929e+06	2.33171e+06	7.50246e+06	7.32022e+06	3.83931e+06	7.75326e+06	1.15506e+07	1.40664e+07	1.94331e+06	1.68801e+06	2.29171e+06	6.51597e+06	7.36299e+06	5.93042e+06	1.00719e+07	1.01801e+07	9.10482e+06	1	1	1	3.35302	4.36194	2.58776	5.18283	6.03084	3.97293
PMT1	P33775	Dolichyl-phosphate-mannose--protein mannosyltransferase 1 OS=Saccharomyces cerevisiae (strain ATCC 204508 / S288c) GN=PMT1 PE=1 SV=1	1	1	3	3	4	5.72754	1022660	875402	979322	4249520	5510260	2243930	3126700	7274510	5310420	1.1173e+06	697112	1.12562e+06	4.64277e+06	4.388e+06	2.57916e+06	3.41604e+06	5.79294e+06	6.10375e+06	1.00297e+06	790127	1.10632e+06	4.0323e+06	4.41364e+06	3.98391e+06	4.43761e+06	5.10558e+06	3.95081e+06	1	1	1	4.02035	5.58599	3.60106	4.42446	6.46172	3.57114
RLP7	P40693	Ribosome biogenesis protein RLP7 OS=Saccharomyces cerevisiae (strain ATCC 204508 / S288c) GN=RLP7 PE=1 SV=1	1	1	3	3	2	5.78272	737501	1066890	514438	2976230	2787970	494523	1464350	2162280	2793450	673613	773308	777056	2.71841e+06	2.02079e+06	746974	1.3375e+06	1.56727e+06	4.21949e+06	604687	876490	763726	2.36097e+06	2.0326e+06	1.15382e+06	1.73748e+06	1.38131e+06	2.73117e+06	1	1	1	3.90445	2.31902	1.51078	2.87335	1.57596	3.57612
MLH1	P38920	DNA mismatch repair protein MLH1 OS=Saccharomyces cerevisiae (strain ATCC 204508 / S288c) GN=MLH1 PE=1 SV=2	1	1	3	3	2	5.40663	281877	331679	NA	1915720	1658740	556253	1347700	2394510	1854660	257648	248757	NA	1.75105e+06	1.24405e+06	811422	1.23186e+06	1.79587e+06	2.70545e+06	231285	281949	NA	1.52081e+06	1.25132e+06	1.25337e+06	1.60025e+06	1.58278e+06	1.75117e+06	1	1	NA	6.57549	4.43809	NA	6.91894	5.61372	NA
MCK1	P21965	Protein kinase MCK1 OS=Saccharomyces cerevisiae (strain ATCC 204508 / S288c) GN=MCK1 PE=1 SV=1	1	1	3	3	2	6.20975	1091670	692309	675565	4399750	6346230	2975370	2859140	5776290	5071990	1.13071e+06	584328	772770	4.5571e+06	5.3564e+06	3.40349e+06	2.96139e+06	4.87535e+06	5.80178e+06	1.01501e+06	662295	759514	3.95789e+06	5.3877e+06	5.25722e+06	3.84699e+06	4.29687e+06	3.75535e+06	1	1	1	3.89935	8.13489	6.92183	3.79009	6.48785	4.94441
AMD1	P15274	AMP deaminase OS=Saccharomyces cerevisiae (strain ATCC 204508 / S288c) GN=AMD1 PE=1 SV=2	1	1	3	3	9	6.12388	4261530	3186830	3316220	29687300	35599600	20751800	12388300	20609900	18008000	4.34048e+06	2.84067e+06	3.65267e+06	3.02373e+07	3.17327e+07	2.28572e+07	1.26178e+07	1.83712e+07	1.9835e+07	3.89635e+06	3.2197e+06	3.59001e+06	2.62614e+07	3.19181e+07	3.53065e+07	1.63912e+07	1.61914e+07	1.28387e+07	1	1	1	6.74002	9.91339	9.83466	4.2068	5.02885	3.57623
SHM2	P37291	Serine hydroxymethyltransferase, cytosolic OS=Saccharomyces cerevisiae (strain ATCC 204508 / S288c) GN=SHM2 PE=1 SV=2	1	1	3	3	10	7.21827	9972770	6659810	5210770	47272100	49213400	24441300	40848500	53103200	61472400	8.92282e+06	6.163e+06	6.2934e+06	4.22952e+07	4.55421e+07	2.95194e+07	3.65479e+07	4.91418e+07	7.42444e+07	8.00981e+06	6.98532e+06	6.18544e+06	3.67339e+07	4.58083e+07	4.55974e+07	4.74776e+07	4.33109e+07	4.80566e+07	1	1	1	4.58611	6.55779	7.37173	5.92743	6.20027	7.7693
SHM1	P37292	Serine hydroxymethyltransferase, mitochondrial OS=Saccharomyces cerevisiae (strain ATCC 204508 / S288c) GN=SHM1 PE=1 SV=2	1	1	3	3	2	6.2655	1483390	844240	585403	7666930	7353340	3110190	6137510	10389500	9284830	1.25607e+06	733948	795239	6.49202e+06	6.3927e+06	4.22503e+06	5.19697e+06	9.03221e+06	1.26129e+07	1.12754e+06	831878	781597	5.63839e+06	6.43005e+06	6.52622e+06	6.75113e+06	7.9605e+06	8.16405e+06	1	1	1	5.0006	7.72956	8.34985	5.98746	9.56931	10.4453
FHL1	P39521	Pre-rRNA-processing protein FHL1 OS=Saccharomyces cerevisiae (strain ATCC 204508 / S288c) GN=FHL1 PE=1 SV=1	1	1	3	3	2	7.03779	287134	523065	544688	2460310	2357380	780140	2490900	3786520	3182140	310787	408949	643660	2.66298e+06	1.84307e+06	921894	2.69609e+06	2.96042e+06	3.76035e+06	278986	463515	632618	2.31283e+06	1.85384e+06	1.42401e+06	3.50236e+06	2.60916e+06	2.43398e+06	1	1	1	8.29012	3.99954	2.25098	12.5539	5.62907	3.84747
LEU4	P06208|P06208-2	2-isopropylmalate synthase OS=Saccharomyces cerevisiae (strain ATCC 204508 / S288c) GN=LEU4 PE=1 SV=1|Isoform Cytoplasmic of 2-isopropylmalate synthase OS=Saccharomyces cerevisiae (strain ATCC 204508 / S288c) GN=LEU4	1	1	3	3	3	5.85207	1749400	1107070	717440	11342300	8397110	4444700	8061470	9799030	12807900	1.41203e+06	1.07804e+06	912793	9.15493e+06	8.17691e+06	5.65496e+06	6.50681e+06	9.54207e+06	1.62954e+07	1.26754e+06	1.22188e+06	897135	7.95117e+06	8.22469e+06	8.73497e+06	8.45267e+06	8.40986e+06	1.05476e+07	1	1	1	6.27289	6.73117	9.73652	6.66854	6.88272	11.757
OLA1	P38219	Obg-like ATPase 1 OS=Saccharomyces cerevisiae (strain ATCC 204508 / S288c) GN=OLA1 PE=1 SV=1	1	1	3	3	2	6.29566	1475920	1252490	756293	4287570	4527110	2052760	4476870	7818740	6155140	1.37477e+06	1.00488e+06	1.01201e+06	3.99372e+06	3.63212e+06	2.74683e+06	4.17005e+06	6.27301e+06	8.2363e+06	1.2341e+06	1.13896e+06	994649	3.4686e+06	3.65334e+06	4.24292e+06	5.4171e+06	5.52869e+06	5.33116e+06	1	1	1	2.81063	3.20762	4.26575	4.38952	4.85416	5.35984
RPN2	P32565	26S proteasome regulatory subunit RPN2 OS=Saccharomyces cerevisiae (strain ATCC 204508 / S288c) GN=RPN2 PE=1 SV=4	1	1	3	3	6	6.09209	3236300	2939440	2936850	17433000	15183400	6957930	13420900	20316500	19962000	3.08246e+06	2.63646e+06	3.43777e+06	1.66043e+07	1.36184e+07	8.1447e+06	1.27829e+07	1.82224e+07	2.33668e+07	2.76706e+06	2.98824e+06	3.3788e+06	1.44211e+07	1.36979e+07	1.25808e+07	1.66057e+07	1.60602e+07	1.51247e+07	1	1	1	5.2117	4.58396	3.72345	6.00121	5.37448	4.47637
MRPL22	P53881	54S ribosomal protein L22, mitochondrial OS=Saccharomyces cerevisiae (strain ATCC 204508 / S288c) GN=MRPL22 PE=1 SV=2	1	1	3	3	4	6.25294	1461990	1240900	1201350	19317100	19588300	5535100	8827930	13735200	13189900	1.3447e+06	1.03548e+06	1.56526e+06	1.77673e+07	1.63456e+07	7.21176e+06	8.11967e+06	1.14615e+07	1.71853e+07	1.2071e+06	1.17364e+06	1.5384e+06	1.54311e+07	1.64411e+07	1.11397e+07	1.05479e+07	1.01015e+07	1.11236e+07	1	1	1	12.7836	14.0086	7.24107	8.73817	8.60697	7.23062
MDG1	P53885	Signal transduction protein MDG1 OS=Saccharomyces cerevisiae (strain ATCC 204508 / S288c) GN=MDG1 PE=1 SV=1	1	1	3	3	3	6.34562	854177	831987	606577	6602080	5505190	1265950	4124800	7063410	6393970	745427	650454	889056	5.76153e+06	4.304e+06	1.85549e+06	3.59965e+06	5.52223e+06	9.3716e+06	669152	737243	873805	5.00396e+06	4.32915e+06	2.8661e+06	4.67612e+06	4.86699e+06	6.06601e+06	1	1	1	7.47806	5.87208	3.28003	6.98813	6.60161	6.94206
IES1	P43579	Ino eighty subunit 1 OS=Saccharomyces cerevisiae (strain ATCC 204508 / S288c) GN=IES1 PE=1 SV=1	1	1	3	3	2	5.89964	930974	2567390	4143570	5856200	7829210	2020040	3521980	8909970	7499650	1.36096e+06	1.783e+06	4.08136e+06	8.56101e+06	5.43724e+06	1.98971e+06	5.14868e+06	6.18781e+06	7.38706e+06	1.22171e+06	2.02091e+06	4.01135e+06	7.43534e+06	5.46901e+06	3.07343e+06	6.68839e+06	5.4536e+06	4.78146e+06	1	1	1	6.08603	2.70621	0.766182	5.47463	2.69859	1.19198
MRPS28	P21771	37S ribosomal protein S28, mitochondrial OS=Saccharomyces cerevisiae (strain ATCC 204508 / S288c) GN=MRPS28 PE=1 SV=1	1	1	3	3	3	6.52391	1394170	3458850	1249140	16770800	16330900	4773740	13027800	29402500	19779800	1.51487e+06	2.13532e+06	1.86217e+06	1.82227e+07	1.00819e+07	7.11653e+06	1.41557e+07	1.81516e+07	2.9487e+07	1.35986e+06	2.42023e+06	1.83023e+06	1.58267e+07	1.01408e+07	1.09926e+07	1.83889e+07	1.59979e+07	1.90862e+07	1	1	1	11.6384	4.19	6.00613	13.5226	6.61005	10.4283
EPL1	P43572	Enhancer of polycomb-like protein 1 OS=Saccharomyces cerevisiae (strain ATCC 204508 / S288c) GN=EPL1 PE=1 SV=1	1	1	3	3	5	5.78083	1951370	1300950	1251040	5480910	6935050	3827040	6922190	9542970	7125570	1.82069e+06	1.15426e+06	1.51123e+06	5.11387e+06	6.1531e+06	4.62297e+06	6.45864e+06	8.46697e+06	8.60751e+06	1.63439e+06	1.30828e+06	1.4853e+06	4.44146e+06	6.18906e+06	7.14091e+06	8.39009e+06	7.46233e+06	5.57143e+06	1	1	1	2.7175	4.73069	4.80771	5.13345	5.70394	3.75104
NTO1	Q12311	NuA3 HAT complex component NTO1 OS=Saccharomyces cerevisiae (strain ATCC 204508 / S288c) GN=NTO1 PE=1 SV=1	1	1	3	3	10	6.97609	2775820	8570890	4085490	30338700	33157000	6383540	65064500	75276400	76393300	2.88601e+06	5.65922e+06	5.95124e+06	3.1543e+07	2.1893e+07	9.29876e+06	6.76473e+07	4.97038e+07	1.1128e+08	2.5907e+06	6.41432e+06	5.84915e+06	2.73955e+07	2.20209e+07	1.43634e+07	8.78772e+07	4.38062e+07	7.20291e+07	1	1	1	10.5745	3.43309	2.45564	33.9202	6.82944	12.3144
HHO1	P53551	Histone H1 OS=Saccharomyces cerevisiae (strain ATCC 204508 / S288c) GN=HHO1 PE=1 SV=1	1	1	3	3	6	7.28543	2409720	2730620	2848180	59077100	54620800	8033550	56002700	101175000	83489900	2.20705e+06	2.02181e+06	4.19993e+06	5.41084e+07	4.04425e+07	1.18463e+07	5.12926e+07	7.49123e+07	1.23114e+08	1.98122e+06	2.29158e+06	4.12788e+06	4.69938e+07	4.06788e+07	1.82984e+07	6.66317e+07	6.60236e+07	7.96888e+07	1	1	1	23.7197	17.7514	4.43289	33.6317	28.8114	19.305
RPL26B	P53221	60S ribosomal protein L26-B OS=Saccharomyces cerevisiae (strain ATCC 204508 / S288c) GN=RPL26B PE=1 SV=2	1	1	3	3	8	7.31145	44253600	45979800	44890100	59967300	56643000	51323100	38095600	54150200	52114500	4.6807e+07	4.35249e+07	4.48351e+07	6.34274e+07	5.36187e+07	5.12602e+07	4.02937e+07	5.1259e+07	5.20506e+07	4.20176e+07	4.93324e+07	4.4066e+07	5.50874e+07	5.39321e+07	7.91795e+07	5.23435e+07	4.51769e+07	3.36911e+07	1	1	1	1.31106	1.09324	1.79684	1.24575	0.915767	0.76456
MRM1	P25270	rRNA methyltransferase 1, mitochondrial OS=Saccharomyces cerevisiae (strain ATCC 204508 / S288c) GN=MRM1 PE=1 SV=2	1	1	3	3	3	5.71654	1502380	984877	1384990	11469200	9942650	3264840	5509200	8068940	8457660	1.33062e+06	927303	1.66086e+06	1.01579e+07	9.36143e+06	3.91516e+06	4.87934e+06	7.59725e+06	1.01423e+07	1.19446e+06	1.05103e+06	1.63237e+06	8.8223e+06	9.41613e+06	6.04758e+06	6.33851e+06	6.69581e+06	6.56488e+06	1	1	1	7.386	8.95893	3.70478	5.30658	6.37069	4.02168
RPS16A|RPS16B	P0CX51|P0CX52	40S ribosomal protein S16-A OS=Saccharomyces cerevisiae (strain ATCC 204508 / S288c) GN=RPS16A PE=1 SV=1|40S ribosomal protein S16-B OS=Saccharomyces cerevisiae (strain ATCC 204508 / S288c) GN=RPS16B PE=1 SV=1	1	1	3	3	7	7.90044	8562450	8019380	7692700	64513900	71590400	31717400	38241700	63924400	56446700	8.68179e+06	6.76385e+06	8.99528e+06	6.54131e+07	6.03821e+07	3.7088e+07	3.87747e+07	5.39163e+07	6.60046e+07	7.79344e+06	7.66635e+06	8.84097e+06	5.6812e+07	6.07349e+07	5.72883e+07	5.03703e+07	4.75189e+07	4.27232e+07	1	1	1	7.28972	7.92228	6.47986	6.46316	6.19838	4.83241
SLM1	P40485	Phosphatidylinositol 4,5-bisphosphate-binding protein SLM1 OS=Saccharomyces cerevisiae (strain ATCC 204508 / S288c) GN=SLM1 PE=1 SV=1	1	1	3	3	4	6.27367	3016370	1151230	1039700	12805700	22152200	10125200	8284540	19597100	12827800	2.87982e+06	947336	1.32338e+06	1.2226e+07	1.82288e+07	1.28879e+07	7.90949e+06	1.61263e+07	1.63279e+07	2.58514e+06	1.07374e+06	1.30068e+06	1.06184e+07	1.83354e+07	1.99074e+07	1.02748e+07	1.42128e+07	1.05686e+07	1	1	1	4.10747	17.0762	15.3053	3.97456	13.2368	8.12546
SEC24	P40482	Protein transport protein SEC24 OS=Saccharomyces cerevisiae (strain ATCC 204508 / S288c) GN=SEC24 PE=1 SV=1	1	1	3	3	3	5.72604	830439	498742	505059	5836040	3685670	1573920	3600560	7648910	5553300	695922	449156	669219	4.8907e+06	3.31923e+06	2.08549e+06	3.01733e+06	6.88843e+06	7.3583e+06	624713	509086	657739	4.24763e+06	3.33863e+06	3.22137e+06	3.91966e+06	6.07109e+06	4.76285e+06	1	1	1	6.79933	6.55808	4.89765	6.27434	11.9255	7.24124
ARP4	P80428	Actin-related protein 4 OS=Saccharomyces cerevisiae (strain ATCC 204508 / S288c) GN=ARP4 PE=1 SV=1	1	1	3	3	4	6.10595	1267380	1143780	1047020	8683150	9887020	4187910	7821020	16519900	11501900	1.3017e+06	907315	1.28509e+06	8.9183e+06	7.84298e+06	5.14017e+06	8.03282e+06	1.31046e+07	1.41172e+07	1.16851e+06	1.02838e+06	1.26305e+06	7.74565e+06	7.8888e+06	7.9398e+06	1.0435e+07	1.15497e+07	9.13774e+06	1	1	1	6.62867	7.67112	6.28621	8.93022	11.231	7.23466
BMH1	P29311	Protein BMH1 OS=Saccharomyces cerevisiae (strain ATCC 204508 / S288c) GN=BMH1 PE=1 SV=4	1	1	3	3	2	5.89313	2371670	2481560	1625400	7344700	7030110	6526060	4592570	8231750	8116570	2.55171e+06	2.19687e+06	1.70649e+06	7.90226e+06	6.22359e+06	6.85165e+06	4.94121e+06	7.28737e+06	8.52151e+06	2.29061e+06	2.48999e+06	1.67722e+06	6.86321e+06	6.25996e+06	1.05835e+07	6.41887e+06	6.4227e+06	5.51576e+06	1	1	1	2.99623	2.51405	6.31012	2.80225	2.5794	3.28864
FBP1	P09201	Fructose-1,6-bisphosphatase OS=Saccharomyces cerevisiae (strain ATCC 204508 / S288c) GN=FBP1 PE=1 SV=2	1	1	3	3	6	6.21667	2924240	3522920	1777800	22827200	16812500	7201010	8633350	17698800	18177700	2.82569e+06	2.78871e+06	2.32419e+06	2.20579e+07	1.33086e+07	9.41416e+06	8.3424e+06	1.40102e+07	2.37644e+07	2.53656e+06	3.1608e+06	2.28432e+06	1.91576e+07	1.33864e+07	1.45417e+07	1.08372e+07	1.23478e+07	1.53821e+07	1	1	1	7.55258	4.23512	6.36586	4.2724	3.90655	6.73379
MDJ1	P35191	DnaJ homolog 1, mitochondrial OS=Saccharomyces cerevisiae (strain ATCC 204508 / S288c) GN=MDJ1 PE=1 SV=1	1	1	3	3	3	6.23831	2907000	2497600	1940470	12160600	12451800	7150570	7013600	10803700	10966500	2.84808e+06	2.21123e+06	2.23712e+06	1.19141e+07	1.10241e+07	8.24371e+06	6.87144e+06	9.56497e+06	1.2643e+07	2.55665e+06	2.50627e+06	2.19874e+06	1.03476e+07	1.10885e+07	1.27337e+07	8.92634e+06	8.43005e+06	8.1835e+06	1	1	1	4.0473	4.42431	5.79136	3.49142	3.36358	3.7219
SUI3	P09064	Eukaryotic translation initiation factor 2 subunit beta OS=Saccharomyces cerevisiae (strain ATCC 204508 / S288c) GN=SUI3 PE=1 SV=2	1	1	3	3	3	5.93457	656715	258995	181614	8856090	7994390	2112720	6905710	11742700	10155700	479278	223441	288448	6.46327e+06	6.89694e+06	3.35553e+06	5.03986e+06	1.01307e+07	1.61298e+07	430236	253254	283500	5.61343e+06	6.93724e+06	5.18314e+06	6.54703e+06	8.92864e+06	1.04404e+07	1	1	1	13.0473	27.3924	18.2827	15.2173	35.2556	36.8268
GSY1	P23337	Glycogen [starch] synthase isoform 1 OS=Saccharomyces cerevisiae (strain ATCC 204508 / S288c) GN=GSY1 PE=1 SV=3	1	1	3	3	2	5.81332	2104680	1127210	592462	5365580	3732200	5221590	3136060	4168710	5112030	1.77979e+06	1.20483e+06	655472	4.53733e+06	3.98921e+06	5.77692e+06	2.65197e+06	4.45578e+06	5.65571e+06	1.59768e+06	1.36559e+06	644228	3.94073e+06	4.01252e+06	8.92337e+06	3.44504e+06	3.92709e+06	3.6608e+06	1	1	1	2.46653	2.9383	13.8513	2.15627	2.87573	5.68246
CRM1	P30822	Exportin-1 OS=Saccharomyces cerevisiae (strain ATCC 204508 / S288c) GN=CRM1 PE=1 SV=1	1	1	3	3	3	5.60476	1180130	1032520	799022	4566370	4335520	2904750	2878090	3584690	4327270	1.12876e+06	976435	883365	4.36762e+06	4.10002e+06	3.21137e+06	2.75282e+06	3.38998e+06	4.78405e+06	1.01327e+06	1.10672e+06	868212	3.79333e+06	4.12398e+06	4.96047e+06	3.57605e+06	2.98774e+06	3.0966e+06	1	1	1	3.74367	3.72631	5.71343	3.52923	2.69964	3.56664
NTH1	P32356	Neutral trehalase OS=Saccharomyces cerevisiae (strain ATCC 204508 / S288c) GN=NTH1 PE=1 SV=3	1	1	3	3	2	5.576	938100	835226	409791	2497590	2129800	1623090	2421380	3290780	4016170	865795	762840	486146	2.30509e+06	1.94522e+06	1.92552e+06	2.23475e+06	3.00558e+06	4.76449e+06	777204	864626	477807	2.00199e+06	1.95659e+06	2.97426e+06	2.90305e+06	2.64896e+06	3.08394e+06	1	1	1	2.57589	2.26293	6.22482	3.73525	3.0637	6.45436
KNS1	P32350	Dual specificity protein kinase KNS1 OS=Saccharomyces cerevisiae (strain ATCC 204508 / S288c) GN=KNS1 PE=1 SV=2	1	1	3	3	5	5.84177	1962510	1967670	1133740	8975880	10402700	4720080	6482270	11128600	9456720	1.93584e+06	1.54182e+06	1.46681e+06	8.85388e+06	8.15133e+06	6.10675e+06	6.39416e+06	8.72013e+06	1.22349e+07	1.73776e+06	1.74755e+06	1.44165e+06	7.6897e+06	8.19896e+06	9.43284e+06	8.30634e+06	7.68545e+06	7.91937e+06	1	1	1	4.42508	4.69169	6.54309	4.77992	4.39785	5.49327
RRN5	Q02983	RNA polymerase I-specific transcription initiation factor RRN5 OS=Saccharomyces cerevisiae (strain ATCC 204508 / S288c) GN=RRN5 PE=1 SV=1	1	1	3	3	2	6.22381	913349	654079	587830	5209690	5369030	1399200	3652330	5540040	4872690	785765	541933	824670	4.48196e+06	4.44848e+06	1.96295e+06	3.14214e+06	4.59017e+06	6.83593e+06	705363	614243	810524	3.89263e+06	4.47447e+06	3.03208e+06	4.0818e+06	4.04553e+06	4.42473e+06	1	1	1	5.51863	7.28453	3.74089	5.78681	6.5862	5.4591
ARO9	P38840	Aromatic amino acid aminotransferase 2 OS=Saccharomyces cerevisiae (strain ATCC 204508 / S288c) GN=ARO9 PE=1 SV=3	1	1	3	3	5	6.60485	3191570	2423460	1683100	12077100	10313300	6291770	6471890	11223300	11852900	2.99587e+06	2.1876e+06	1.98636e+06	1.13366e+07	9.30959e+06	7.42543e+06	6.07504e+06	1.0131e+07	1.39886e+07	2.68932e+06	2.4795e+06	1.95229e+06	9.84593e+06	9.36399e+06	1.14697e+07	7.89179e+06	8.92894e+06	9.05446e+06	1	1	1	3.66112	3.77657	5.87503	2.93449	3.60111	4.63787
CRP1	P38845	Cruciform DNA-recognizing protein 1 OS=Saccharomyces cerevisiae (strain ATCC 204508 / S288c) GN=CRP1 PE=1 SV=1	1	1	3	3	4	6.32746	1504690	800870	1057160	12027100	10078400	2009070	8368280	16364600	12307700	1.21921e+06	679186	1.53845e+06	9.74524e+06	8.54709e+06	2.92373e+06	6.78059e+06	1.38782e+07	1.7911e+07	1.09446e+06	769809	1.51206e+06	8.46386e+06	8.59703e+06	4.51616e+06	8.80833e+06	1.22315e+07	1.15933e+07	1	1	1	7.73339	11.1677	2.98677	8.04813	15.889	7.66725
SOF1	P33750	Protein SOF1 OS=Saccharomyces cerevisiae (strain ATCC 204508 / S288c) GN=SOF1 PE=1 SV=1	1	1	3	3	2	5.58296	1168910	2035710	942708	3730410	3822530	1682050	2151830	5365090	4389600	1.33476e+06	1.41331e+06	1.18914e+06	4.25969e+06	2.65383e+06	2.12176e+06	2.45714e+06	3.72477e+06	5.53709e+06	1.19818e+06	1.60189e+06	1.16874e+06	3.69959e+06	2.66934e+06	3.27739e+06	3.19194e+06	3.28281e+06	3.58402e+06	1	1	1	3.08767	1.66637	2.8042	2.66399	2.04934	3.06656
SPP41	P38904	Protein SPP41 OS=Saccharomyces cerevisiae (strain ATCC 204508 / S288c) GN=SPP41 PE=1 SV=2	1	1	3	3	4	6.20451	1643240	1758020	1411350	9685670	10132200	1872490	7810970	14812800	13055800	1.5494e+06	1.28986e+06	2.04012e+06	9.13253e+06	7.43399e+06	2.7067e+06	7.36489e+06	1.08681e+07	1.88723e+07	1.39086e+06	1.46196e+06	2.00512e+06	7.93171e+06	7.47743e+06	4.18093e+06	9.56736e+06	9.5786e+06	1.22156e+07	1	1	1	5.70275	5.11465	2.08512	6.87875	6.55187	6.09218
RPB11	P38902	DNA-directed RNA polymerase II subunit RPB11 OS=Saccharomyces cerevisiae (strain ATCC 204508 / S288c) GN=RPB11 PE=1 SV=1	1	1	3	3	3	6.25071	974146	1165220	1155280	3311290	4476060	1817230	6884240	7900730	5825790	976509	950522	1.4128e+06	3.31932e+06	3.65132e+06	2.22231e+06	6.90094e+06	6.44498e+06	7.12441e+06	876589	1.07735e+06	1.38857e+06	2.88287e+06	3.67266e+06	3.4327e+06	8.96466e+06	5.68025e+06	4.61145e+06	1	1	1	3.28874	3.40898	2.47212	10.2268	5.27244	3.32102
RTS1	P38903	Serine/threonine-protein phosphatase 2A 56 kDa regulatory subunit delta isoform OS=Saccharomyces cerevisiae (strain ATCC 204508 / S288c) GN=RTS1 PE=1 SV=2	1	1	3	3	3	6.18327	1003250	647517	1126380	8764550	9715700	2387140	5184590	6894470	6609130	898557	589653	1.38103e+06	7.84993e+06	8.84748e+06	2.92682e+06	4.64356e+06	6.27836e+06	8.10331e+06	806614	668330	1.35734e+06	6.81776e+06	8.89918e+06	4.52094e+06	6.03221e+06	5.53341e+06	5.24508e+06	1	1	1	8.45233	13.3155	3.33073	7.47844	8.27945	3.86423
GET4	Q12125	Golgi to ER traffic protein 4 OS=Saccharomyces cerevisiae (strain ATCC 204508 / S288c) GN=GET4 PE=1 SV=1	1	1	3	3	4	6.66268	2367990	2257290	1710450	25333300	31982700	6454610	12496200	27168300	19870800	2.29878e+06	1.59026e+06	2.501e+06	2.45929e+07	2.25317e+07	9.43784e+06	1.2131e+07	1.914e+07	2.90548e+07	2.06356e+06	1.80244e+06	2.45809e+06	2.13592e+07	2.26634e+07	1.45782e+07	1.57588e+07	1.6869e+07	1.88065e+07	1	1	1	10.3507	12.5737	5.93071	7.63667	9.35895	7.65083
SNF1	P06782	Carbon catabolite-derepressing protein kinase OS=Saccharomyces cerevisiae (strain ATCC 204508 / S288c) GN=SNF1 PE=1 SV=1	1	1	3	3	3	6.4501	2858050	2535810	2184370	23821800	28213000	6566540	4135300	5956830	5646580	2.60586e+06	2.01367e+06	3.017e+06	2.17198e+07	2.24037e+07	9.06954e+06	3.7704e+06	4.73027e+06	7.79891e+06	2.33922e+06	2.28235e+06	2.96524e+06	1.88639e+07	2.25346e+07	1.40093e+07	4.89794e+06	4.16901e+06	5.04804e+06	1	1	1	8.06419	9.87344	4.72452	2.09384	1.82663	1.70241
TOP2	P06786	DNA topoisomerase 2 OS=Saccharomyces cerevisiae (strain ATCC 204508 / S288c) GN=TOP2 PE=1 SV=2	1	1	3	3	16	6.94653	6959600	8963140	8623900	71702900	62234700	20192100	57534000	96186500	70763200	6.79111e+06	7.10062e+06	1.11561e+07	6.9967e+07	4.93025e+07	2.61209e+07	5.61411e+07	7.61992e+07	9.15408e+07	6.09622e+06	8.04805e+06	1.09647e+07	6.07672e+07	4.95906e+07	4.03479e+07	7.29301e+07	6.71578e+07	5.92521e+07	1	1	1	9.968	6.16181	3.6798	11.9632	8.34461	5.4039
RPS28B|RPS28A	P0C0X0|Q3E7X9	40S ribosomal protein S28-B OS=Saccharomyces cerevisiae (strain ATCC 204508 / S288c) GN=RPS28B PE=1 SV=1|40S ribosomal protein S28-A OS=Saccharomyces cerevisiae (strain ATCC 204508 / S288c) GN=RPS28A PE=1 SV=1	1	1	3	3	4	6.67528	4233580	4127870	3368170	10937200	10999500	7591730	8472640	11642900	11722900	4.24732e+06	3.74936e+06	3.6962e+06	1.09727e+07	9.99089e+06	8.3311e+06	8.50014e+06	1.05753e+07	1.28646e+07	3.81272e+06	4.24964e+06	3.6328e+06	9.52992e+06	1.00493e+07	1.28687e+07	1.10421e+07	9.3205e+06	8.32694e+06	1	1	1	2.49951	2.36474	3.54237	2.89612	2.19325	2.29216
HOM2	P13663	Aspartate-semialdehyde dehydrogenase OS=Saccharomyces cerevisiae (strain ATCC 204508 / S288c) GN=HOM2 PE=1 SV=1	1	1	3	3	3	5.99494	2766320	1890310	1239290	5780580	6375920	3035530	4608360	5688030	8687860	2.50716e+06	1.75499e+06	1.47283e+06	5.23903e+06	5.91948e+06	3.60757e+06	4.17663e+06	5.28083e+06	1.03251e+07	2.25062e+06	1.98915e+06	1.44757e+06	4.55016e+06	5.95407e+06	5.57246e+06	5.42565e+06	4.65424e+06	6.68316e+06	1	1	1	2.02174	2.99327	3.84954	2.41074	2.33981	4.61683
TSA1	P34760	Peroxiredoxin TSA1 OS=Saccharomyces cerevisiae (strain ATCC 204508 / S288c) GN=TSA1 PE=1 SV=3	1	1	3	3	2	6.49176	7775340	3443460	1704840	18524000	12868300	8743690	8442220	11130600	12983400	5.73449e+06	3.4308e+06	2.3201e+06	1.36619e+07	1.2821e+07	1.18992e+07	6.22633e+06	1.10897e+07	1.7669e+07	5.14772e+06	3.88857e+06	2.2803e+06	1.18655e+07	1.28959e+07	1.83802e+07	8.08832e+06	9.77386e+06	1.14367e+07	1	1	1	2.305	3.31636	8.06043	1.57124	2.51348	5.01543
MSH6	Q03834	DNA mismatch repair protein MSH6 OS=Saccharomyces cerevisiae (strain ATCC 204508 / S288c) GN=MSH6 PE=1 SV=1	1	1	3	3	5	6.20984	772758	585993	805870	8370370	9417830	2028500	9048210	21426600	11665600	737684	442491	1.11796e+06	7.99046e+06	7.11152e+06	2.81408e+06	8.63753e+06	1.61795e+07	1.61834e+07	662202	501532	1.09878e+06	6.93981e+06	7.15308e+06	4.34679e+06	1.12206e+07	1.42597e+07	1.04751e+07	1	1	1	10.4799	14.2625	3.95601	16.9444	28.4324	9.53335
RPL34B|RPL34A	P40525|P87262	60S ribosomal protein L34-B OS=Saccharomyces cerevisiae (strain ATCC 204508 / S288c) GN=RPL34B PE=1 SV=1|60S ribosomal protein L34-A OS=Saccharomyces cerevisiae (strain ATCC 204508 / S288c) GN=RPL34A PE=1 SV=1	1	1	3	3	6	8.2014	5993830	13895800	19840500	404165000	396031000	57140300	242569000	103521000	319024000	5.65964e+06	1.32573e+07	2.20241e+07	3.81631e+08	3.77833e+08	6.34289e+07	2.29045e+08	9.87641e+07	3.54134e+08	5.08053e+06	1.50262e+07	2.16463e+07	3.31451e+08	3.80041e+08	9.7976e+07	2.9754e+08	8.70453e+07	2.29222e+08	1	1	1	65.2394	25.2919	4.52623	58.5648	5.79291	10.5895
UBP3	Q01477	Ubiquitin carboxyl-terminal hydrolase 3 OS=Saccharomyces cerevisiae (strain ATCC 204508 / S288c) GN=UBP3 PE=1 SV=1	1	1	3	3	3	5.63702	694794	583951	821032	5763630	5709650	2372520	4599560	9143670	6671840	706876	502247	938278	5.86386e+06	4.91078e+06	2.71132e+06	4.67954e+06	7.86433e+06	7.6246e+06	634546	569262	922183	5.09283e+06	4.93948e+06	4.18807e+06	6.07896e+06	6.9312e+06	4.93522e+06	1	1	1	8.02594	8.67699	4.54147	9.58001	12.1758	5.35167
ADH1	P00330	Alcohol dehydrogenase 1 OS=Saccharomyces cerevisiae (strain ATCC 204508 / S288c) GN=ADH1 PE=1 SV=5	1	1	3	3	8	7.09732	13065900	12743700	10629600	36566100	33031300	19491000	26105500	35074800	37626300	1.26358e+07	1.16503e+07	1.20231e+07	3.53623e+07	3.01971e+07	2.20461e+07	2.52461e+07	3.20653e+07	4.25588e+07	1.13428e+07	1.32047e+07	1.18168e+07	3.07126e+07	3.03736e+07	3.40537e+07	3.27959e+07	2.82606e+07	2.75473e+07	1	1	1	2.70767	2.3002	2.8818	2.89134	2.14019	2.33119
ADH2	P00331	Alcohol dehydrogenase 2 OS=Saccharomyces cerevisiae (strain ATCC 204508 / S288c) GN=ADH2 PE=1 SV=3	1	1	3	3	3	6.17989	1365050	750103	892176	7117000	4937040	8761020	3999580	5124830	7210370	1.31376e+06	916684	758550	6.84959e+06	6.03345e+06	7.44883e+06	3.8493e+06	6.26294e+06	6.13043e+06	1.17933e+06	1.039e+06	745538	5.94895e+06	6.0687e+06	1.15059e+07	5.00044e+06	5.51982e+06	3.96808e+06	1	1	1	5.04434	5.84093	15.433	4.24006	5.31264	5.32244
UTP23	Q12339	rRNA-processing protein UTP23 OS=Saccharomyces cerevisiae (strain ATCC 204508 / S288c) GN=UTP23 PE=1 SV=1	1	1	3	3	6	6.31309	8695770	2863750	3081340	22446200	24718200	4728560	21924100	29599100	25714500	6.12806e+06	2.56053e+06	4.89023e+06	1.58182e+07	2.2101e+07	7.50445e+06	1.54503e+07	2.64651e+07	4.08101e+07	5.50101e+06	2.90218e+06	4.80635e+06	1.37383e+07	2.22302e+07	1.15918e+07	2.00707e+07	2.33249e+07	2.64154e+07	1	1	1	2.49741	7.6598	2.41177	3.64854	8.03703	5.49594
SWC4	P53201	SWR1-complex protein 4 OS=Saccharomyces cerevisiae (strain ATCC 204508 / S288c) GN=SWC4 PE=1 SV=1	1	1	3	3	2	5.83951	257973	256442	132907	2247620	3144150	1417970	2939440	3810000	2842990	242193	197830	183510	2.11013e+06	2.42552e+06	1.95784e+06	2.75964e+06	2.93918e+06	3.92542e+06	217411	224226	180362	1.83268e+06	2.4397e+06	3.0242e+06	3.5849e+06	2.59044e+06	2.54083e+06	1	1	1	8.42955	10.8805	16.7674	16.4891	11.5528	14.0874
SIS1	P25294	Protein SIS1 OS=Saccharomyces cerevisiae (strain ATCC 204508 / S288c) GN=SIS1 PE=1 SV=1	1	1	3	3	7	7.08422	19643500	15791800	11949400	16750500	23878400	30167500	11481000	14274900	15819800	2.13884e+07	1.52803e+07	1.13419e+07	1.82385e+07	2.31049e+07	2.86338e+07	1.25009e+07	1.38125e+07	1.50156e+07	1.91999e+07	1.73191e+07	1.11474e+07	1.58403e+07	2.32399e+07	4.42295e+07	1.62393e+07	1.21736e+07	9.7192e+06	1	1	1	0.82502	1.34187	3.96771	0.845798	0.7029	0.871884
SUB1	P54000	RNA polymerase II transcriptional coactivator SUB1 OS=Saccharomyces cerevisiae (strain ATCC 204508 / S288c) GN=SUB1 PE=1 SV=1	1	1	3	3	5	6.50128	743990	1249090	897936	6096080	6325210	1901790	12352700	14636000	13923400	733122	966717	1.17742e+06	6.00703e+06	4.89531e+06	2.49372e+06	1.21723e+07	1.13273e+07	1.8257e+07	658107	1.09571e+06	1.15722e+06	5.21718e+06	4.92392e+06	3.85194e+06	1.58124e+07	9.98331e+06	1.18173e+07	1	1	1	7.92756	4.49384	3.32862	24.0271	9.11131	10.2118
RSR1	P13856	Ras-related protein RSR1 OS=Saccharomyces cerevisiae (strain ATCC 204508 / S288c) GN=RSR1 PE=3 SV=1	1	1	3	3	2	5.57726	642691	354955	293495	4683760	5079480	1997450	3244400	4728010	4827300	551655	318805	380700	4.02032e+06	4.56217e+06	2.59094e+06	2.78484e+06	4.2465e+06	6.26162e+06	495208	361343	374170	3.49169e+06	4.58883e+06	4.00212e+06	3.61764e+06	3.74263e+06	4.05299e+06	1	1	1	7.05096	12.6994	10.696	7.3053	10.3576	10.832
IMH1	Q06704	Golgin IMH1 OS=Saccharomyces cerevisiae (strain ATCC 204508 / S288c) GN=IMH1 PE=1 SV=1	1	1	3	3	2	5.40745	316838	727424	290970	1837140	2040790	901691	1343140	1984530	1979810	350851	517638	369253	2.03436e+06	1.45223e+06	1.14428e+06	1.48733e+06	1.4122e+06	2.51246e+06	314951	586706	362919	1.76687e+06	1.46072e+06	1.76753e+06	1.93211e+06	1.24464e+06	1.62626e+06	1	1	1	5.60997	2.4897	4.87031	6.13465	2.1214	4.48104
GCN5	Q03330	Histone acetyltransferase GCN5 OS=Saccharomyces cerevisiae (strain ATCC 204508 / S288c) GN=GCN5 PE=1 SV=1	1	1	3	3	2	5.59375	826303	683081	881227	1695550	1928940	1222520	1579010	2304560	2170680	861193	640597	901600	1.76714e+06	1.80897e+06	1.25078e+06	1.64568e+06	2.16123e+06	2.22086e+06	773073	726072	886134	1.53478e+06	1.81954e+06	1.93203e+06	2.13782e+06	1.90479e+06	1.43751e+06	1	1	1	1.9853	2.50601	2.18029	2.76536	2.62342	1.62223
HTZ1	Q12692	Histone H2A.Z OS=Saccharomyces cerevisiae (strain ATCC 204508 / S288c) GN=HTZ1 PE=1 SV=3	1	1	3	3	3	6.6964	4045150	5861680	4630220	13483700	16449600	4981900	24399200	40371100	35926800	4.32385e+06	4.38109e+06	5.7957e+06	1.44127e+07	1.22946e+07	6.2359e+06	2.60802e+07	3.01738e+07	4.497e+07	3.88142e+06	4.96565e+06	5.69628e+06	1.25176e+07	1.23665e+07	9.63233e+06	3.38795e+07	2.65936e+07	2.9108e+07	1	1	1	3.225	2.4904	1.69099	8.72864	5.35551	5.11
RPL13B|RPL13A	P40212|Q12690	60S ribosomal protein L13-B OS=Saccharomyces cerevisiae (strain ATCC 204508 / S288c) GN=RPL13B PE=1 SV=1|60S ribosomal protein L13-A OS=Saccharomyces cerevisiae (strain ATCC 204508 / S288c) GN=RPL13A PE=1 SV=1	1	1	3	3	8	8.03646	6414390	8008200	5448400	80315000	89742200	15173900	36553400	38042200	51569600	5.66847e+06	6.2499e+06	7.89987e+06	7.09753e+07	7.00382e+07	2.20013e+07	3.23027e+07	2.96896e+07	7.4773e+07	5.08846e+06	7.08382e+06	7.76435e+06	6.16429e+07	7.04475e+07	3.39845e+07	4.19628e+07	2.61668e+07	4.83987e+07	1	1	1	12.1143	9.94484	4.37699	8.24666	3.69388	6.23345
SPT7	P35177	Transcriptional activator SPT7 OS=Saccharomyces cerevisiae (strain ATCC 204508 / S288c) GN=SPT7 PE=1 SV=1	1	1	3	3	3	5.5956	476367	1309890	777414	4692460	4829580	3106160	5930690	7941770	7032230	567779	1.00138e+06	853197	5.59291e+06	3.69212e+06	3.40895e+06	7.06875e+06	6.07132e+06	7.71773e+06	509682	1.135e+06	838561	4.85751e+06	3.71369e+06	5.26566e+06	9.18266e+06	5.35094e+06	4.9955e+06	1	1	1	9.53048	3.27198	6.2794	18.0165	4.71449	5.95723
STE24	P47154	CAAX prenyl protease 1 OS=Saccharomyces cerevisiae (strain ATCC 204508 / S288c) GN=STE24 PE=1 SV=1	1	1	3	3	2	5.81539	938982	526254	380861	3024820	3258370	1644640	2251210	4844260	4164990	875038	449450	478531	2.81883e+06	2.78283e+06	2.0664e+06	2.09791e+06	4.13727e+06	5.23308e+06	785502	509420	470322	2.44819e+06	2.79909e+06	3.19188e+06	2.72528e+06	3.64637e+06	3.38725e+06	1	1	1	3.11672	5.49466	6.78658	3.46948	7.15787	7.20197
YNL115C	P53925	Uncharacterized vacuolar membrane protein YNL115C OS=Saccharomyces cerevisiae (strain ATCC 204508 / S288c) GN=YNL115C PE=1 SV=1	1	1	3	3	2	5.88222	2025850	1687960	1059840	4414150	5023220	3490010	2604430	4721070	4615010	2.0785e+06	1.44577e+06	1.20603e+06	4.52888e+06	4.30249e+06	3.97142e+06	2.67212e+06	4.04369e+06	5.2516e+06	1.86582e+06	1.63868e+06	1.18535e+06	3.93338e+06	4.32763e+06	6.13449e+06	3.47122e+06	3.56389e+06	3.39923e+06	1	1	1	2.10812	2.64092	5.17527	1.86042	2.17485	2.86772
DMA2	P53924	E3 ubiquitin-protein ligase DMA2 OS=Saccharomyces cerevisiae (strain ATCC 204508 / S288c) GN=DMA2 PE=1 SV=1	1	1	3	3	2	6.86559	625712	2063880	1155370	13236000	13551100	1973430	2586450	19039100	5852750	848379	958833	1.8342e+06	1.79462e+07	6.29554e+06	3.13291e+06	3.50687e+06	8.84515e+06	9.29151e+06	761570	1.08677e+06	1.80274e+06	1.55865e+07	6.33233e+06	4.83927e+06	4.5556e+06	7.79563e+06	6.01416e+06	1	1	1	20.4662	5.82675	2.6844	5.98185	7.17322	3.33613
MSH2	P25847	DNA mismatch repair protein MSH2 OS=Saccharomyces cerevisiae (strain ATCC 204508 / S288c) GN=MSH2 PE=1 SV=2	1	1	3	3	8	6.13965	3965760	14269300	8854690	18242800	21273200	5838430	16690200	40805300	25770000	5.19293e+06	8.59933e+06	1.12208e+07	2.38879e+07	1.28202e+07	7.39857e+06	2.18549e+07	2.45911e+07	3.26562e+07	4.66158e+06	9.74674e+06	1.10283e+07	2.07469e+07	1.28951e+07	1.14283e+07	2.83905e+07	2.16733e+07	2.11376e+07	1	1	1	4.45062	1.32302	1.03626	6.09033	2.22365	1.91666
MSH1	P25846	DNA mismatch repair protein MSH1, mitochondrial OS=Saccharomyces cerevisiae (strain ATCC 204508 / S288c) GN=MSH1 PE=1 SV=2	1	1	3	3	2	5.46902	512174	325123	211868	2065490	2002570	924241	1668590	4043500	2981610	473499	263076	283224	1.90952e+06	1.6204e+06	1.23552e+06	1.54259e+06	3.27184e+06	3.9858e+06	425049	298178	278365	1.65844e+06	1.62987e+06	1.90846e+06	2.0039e+06	2.88362e+06	2.57991e+06	1	1	1	3.90177	5.46608	6.85594	4.71452	9.67079	9.26807
RPA49	Q01080	DNA-directed RNA polymerase I subunit RPA49 OS=Saccharomyces cerevisiae (strain ATCC 204508 / S288c) GN=RPA49 PE=1 SV=2	1	1	3	3	2	5.61892	261844	391669	256877	1516720	1888350	375603	1578980	2086900	1818860	251220	278316	376786	1.45518e+06	1.34184e+06	550932	1.51492e+06	1.48293e+06	2.66789e+06	225515	315452	370322	1.26384e+06	1.34968e+06	851002	1.96795e+06	1.30697e+06	1.72686e+06	1	1	1	5.60426	4.27858	2.298	8.72649	4.14319	4.66313
MOT1	P32333	TATA-binding protein-associated factor MOT1 OS=Saccharomyces cerevisiae (strain ATCC 204508 / S288c) GN=MOT1 PE=1 SV=1	1	1	3	3	5	5.91147	573787	696235	367608	3616000	2571620	2304440	2182520	9956860	4138180	649419	499054	453126	4.09263e+06	1.84331e+06	2.84053e+06	2.4702e+06	7.13698e+06	5.10086e+06	582969	565643	445353	3.5545e+06	1.85408e+06	4.38764e+06	3.20892e+06	6.29015e+06	3.30166e+06	1	1	1	6.09724	3.27783	9.85207	5.50444	11.1204	7.41358
MRPL17	P36528	54S ribosomal protein L17, mitochondrial OS=Saccharomyces cerevisiae (strain ATCC 204508 / S288c) GN=MRPL17 PE=1 SV=2	1	1	3	3	4	6.20612	1829070	1529740	1066110	13249700	16218400	5616380	6741350	9363120	9298650	1.6876e+06	1.25517e+06	1.40824e+06	1.22249e+07	1.33074e+07	7.41876e+06	6.21995e+06	7.68256e+06	1.22827e+07	1.51492e+06	1.42265e+06	1.38408e+06	1.06175e+07	1.33852e+07	1.14594e+07	8.08002e+06	6.771e+06	7.9503e+06	1	1	1	7.0086	9.40863	8.27945	5.33362	4.75943	5.74409
MRPL10	P36520	54S ribosomal protein L10, mitochondrial OS=Saccharomyces cerevisiae (strain ATCC 204508 / S288c) GN=MRPL10 PE=1 SV=2	1	1	3	3	2	6.62826	2101850	1543660	1667960	17064000	18242700	5237810	12485900	20235900	17011900	1.90988e+06	1.2944e+06	2.18908e+06	1.55055e+07	1.5297e+07	6.87427e+06	1.13455e+07	1.69684e+07	2.2327e+07	1.71446e+06	1.46712e+06	2.15153e+06	1.34667e+07	1.53864e+07	1.06184e+07	1.47384e+07	1.4955e+07	1.44517e+07	1	1	1	7.8548	10.4875	4.93527	8.59654	10.1935	6.71693
MRPL11	P36521	54S ribosomal protein L11, mitochondrial OS=Saccharomyces cerevisiae (strain ATCC 204508 / S288c) GN=MRPL11 PE=1 SV=2	1	1	3	3	2	6.07128	2185070	1632020	456960	10695500	12024700	7136610	6726930	13482500	9193770	1.92588e+06	1.20928e+06	699704	9.4268e+06	8.90994e+06	1.09277e+07	5.92898e+06	9.99013e+06	1.40776e+07	1.72881e+06	1.37063e+06	687701	8.18729e+06	8.96201e+06	1.68795e+07	7.70204e+06	8.80476e+06	9.11211e+06	1	1	1	4.73578	6.5386	24.5449	4.4551	6.42387	13.2501
MRPL24	P36525	54S ribosomal protein L24, mitochondrial OS=Saccharomyces cerevisiae (strain ATCC 204508 / S288c) GN=MRPL24 PE=1 SV=2	1	1	3	3	5	6.52052	1577600	1519890	1364600	11167700	11642800	3624210	8170180	10535300	9393720	1.43188e+06	1.26555e+06	1.80562e+06	1.01362e+07	9.69451e+06	4.79551e+06	7.41552e+06	8.77234e+06	1.24297e+07	1.28537e+06	1.43442e+06	1.77465e+06	8.80338e+06	9.75116e+06	7.40743e+06	9.63313e+06	7.73146e+06	8.04542e+06	1	1	1	6.84893	6.798	4.17402	7.49446	5.38997	4.53352
CFT2	Q12102	Cleavage factor two protein 2 OS=Saccharomyces cerevisiae (strain ATCC 204508 / S288c) GN=CFT2 PE=1 SV=1	1	1	3	3	2	5.47213	697595	775195	558570	2353890	2625310	1239420	1784140	3917700	3038820	751511	598147	671968	2.53582e+06	2.02571e+06	1.49104e+06	1.92203e+06	3.02293e+06	3.65575e+06	674614	677958	660441	2.20239e+06	2.03755e+06	2.30315e+06	2.49682e+06	2.66425e+06	2.36627e+06	1	1	1	3.26466	3.00542	3.48729	3.7011	3.92982	3.58287
WRS1	Q12109	Tryptophan--tRNA ligase, cytoplasmic OS=Saccharomyces cerevisiae (strain ATCC 204508 / S288c) GN=WRS1 PE=1 SV=1	1	1	3	3	2	5.65444	375066	425921	181497	2606750	2840440	657854	1890180	6380930	4634060	384504	271119	278129	2.67235e+06	1.80807e+06	1.00811e+06	1.93774e+06	4.06176e+06	7.1013e+06	345160	307294	273358	2.32096e+06	1.81864e+06	1.55718e+06	2.51723e+06	3.57982e+06	4.5965e+06	1	1	1	6.72431	5.91824	5.69648	7.29292	11.6495	16.815
HSC82	P15108	ATP-dependent molecular chaperone HSC82 OS=Saccharomyces cerevisiae (strain ATCC 204508 / S288c) GN=HSC82 PE=1 SV=4	1	1	3	3	3	6.67248	4710920	3602980	3119010	26809600	19570400	14165200	15536300	22439100	25689900	4.32816e+06	3.55647e+06	3.43924e+06	2.46314e+07	1.93178e+07	1.56195e+07	1.4274e+07	2.21494e+07	2.83275e+07	3.88529e+06	4.031e+06	3.38024e+06	2.13926e+07	1.94306e+07	2.41268e+07	1.85426e+07	1.95213e+07	1.83357e+07	1	1	1	5.50605	4.8203	7.13761	4.77252	4.84279	5.42437
SSZ1	P38788	Ribosome-associated complex subunit SSZ1 OS=Saccharomyces cerevisiae (strain ATCC 204508 / S288c) GN=SSZ1 PE=1 SV=2	1	1	3	3	5	6.25138	2108710	2064100	1586520	11343200	13434100	6219680	10876100	21963700	18268800	2.22517e+06	1.64035e+06	1.89188e+06	1.19697e+07	1.06762e+07	7.41677e+06	1.14768e+07	1.74547e+07	2.1785e+07	1.99748e+06	1.85922e+06	1.85942e+06	1.03958e+07	1.07385e+07	1.14564e+07	1.49089e+07	1.53836e+07	1.41009e+07	1	1	1	5.20445	5.77582	6.16126	7.46384	8.27421	7.58347
RPL11A|RPL11B	P0C0W9|Q3E757	60S ribosomal protein L11-A OS=Saccharomyces cerevisiae (strain ATCC 204508 / S288c) GN=RPL11A PE=1 SV=2|60S ribosomal protein L11-B OS=Saccharomyces cerevisiae (strain ATCC 204508 / S288c) GN=RPL11B PE=1 SV=3	1	1	3	3	5	7.36735	2325360	1237880	796195	34183800	25507000	10659800	24292100	50230400	33754700	1.84043e+06	1.04616e+06	1.19034e+06	2.70551e+07	2.15565e+07	1.59368e+07	1.92262e+07	4.24508e+07	5.04646e+07	1.65211e+06	1.18575e+06	1.16992e+06	2.34977e+07	2.16825e+07	2.46169e+07	2.49758e+07	3.74138e+07	3.26645e+07	1	1	1	14.2228	18.2859	21.0415	15.1175	31.553	27.9202
SRP54	P20424	Signal recognition particle subunit SRP54 OS=Saccharomyces cerevisiae (strain ATCC 204508 / S288c) GN=SRP54 PE=1 SV=2	1	1	3	3	3	5.82601	3416380	2159040	1063780	7297690	7178350	5911500	4472130	8881910	7485990	3.17781e+06	1.87204e+06	1.31897e+06	6.78809e+06	6.22412e+06	7.32963e+06	4.15984e+06	7.70123e+06	9.28183e+06	2.85265e+06	2.12182e+06	1.29635e+06	5.89554e+06	6.26049e+06	1.13218e+07	5.40384e+06	6.78744e+06	6.0079e+06	1	1	1	2.06669	2.95053	8.73359	1.89432	3.19888	4.63448
HRR25	P29295	Casein kinase I homolog HRR25 OS=Saccharomyces cerevisiae (strain ATCC 204508 / S288c) GN=HRR25 PE=1 SV=1	1	1	3	3	4	6.54618	2925240	3898650	1930910	26904200	27580300	8490920	11567200	25660300	21314400	2.97486e+06	2.73967e+06	2.70193e+06	2.73606e+07	1.93813e+07	1.18814e+07	1.17634e+07	1.8032e+07	2.98253e+07	2.67046e+06	3.10522e+06	2.65558e+06	2.3763e+07	1.94945e+07	1.83526e+07	1.52813e+07	1.58925e+07	1.93052e+07	1	1	1	8.89845	6.27799	6.91098	5.72233	5.11799	7.26967
YCG1	Q06680	Condensin complex subunit 3 OS=Saccharomyces cerevisiae (strain ATCC 204508 / S288c) GN=YCG1 PE=1 SV=2	1	1	3	3	3	5.77449	931254	1092530	589396	4272090	4084730	1473720	4214990	5503770	5691430	848291	876313	806686	3.8915e+06	3.27634e+06	2.01703e+06	3.83949e+06	4.41455e+06	7.78966e+06	761491	993239	792848	3.37982e+06	3.29549e+06	3.11562e+06	4.98769e+06	3.89075e+06	5.04206e+06	1	1	1	4.43842	3.31792	3.92966	6.54989	3.91723	6.35943
ZUO1	P32527	Zuotin OS=Saccharomyces cerevisiae (strain ATCC 204508 / S288c) GN=ZUO1 PE=1 SV=1	1	1	3	3	6	6.72192	2512980	2408310	1683010	13974700	14344300	4911350	15295800	26366200	24570200	2.39186e+06	1.92227e+06	2.21532e+06	1.33012e+07	1.14494e+07	6.46474e+06	1.45586e+07	2.1045e+07	3.23414e+07	2.14712e+06	2.17876e+06	2.17732e+06	1.15522e+07	1.15163e+07	9.98581e+06	1.89124e+07	1.8548e+07	2.09338e+07	1	1	1	5.38033	5.2857	4.58629	8.80824	8.51309	9.61448
NPL6	P32832	Chromatin structure-remodeling complex subunit RSC7 OS=Saccharomyces cerevisiae (strain ATCC 204508 / S288c) GN=NPL6 PE=1 SV=1	1	1	3	3	6	5.79328	1372800	2247080	965147	9000960	7303240	2895150	6008570	9829090	8228770	1.31367e+06	1.66024e+06	1.36509e+06	8.61327e+06	5.39595e+06	4.09486e+06	5.74977e+06	7.26216e+06	1.16387e+07	1.17925e+06	1.88177e+06	1.34168e+06	7.48073e+06	5.42748e+06	6.32516e+06	7.46924e+06	6.40047e+06	7.53343e+06	1	1	1	6.34362	2.88425	4.71438	6.33388	3.40131	5.61494
PRP19	P32523	Pre-mRNA-processing factor 19 OS=Saccharomyces cerevisiae (strain ATCC 204508 / S288c) GN=PRP19 PE=1 SV=2	1	1	3	3	2	5.55948	433491	489629	172769	2597970	2346240	1468940	1640910	2239700	2441930	398317	402907	228496	2.38716e+06	1.93068e+06	1.94275e+06	1.50776e+06	1.84301e+06	3.22959e+06	357560	456667	224577	2.07328e+06	1.94196e+06	3.00089e+06	1.95866e+06	1.62433e+06	2.09043e+06	1	1	1	5.79842	4.25247	13.3624	5.47785	3.55693	9.30831
MRPL9	P31334	54S ribosomal protein L9, mitochondrial OS=Saccharomyces cerevisiae (strain ATCC 204508 / S288c) GN=MRPL9 PE=1 SV=3	1	1	3	3	3	6.09676	684004	519356	415872	8892180	8171070	4012430	4632020	7550110	5844630	616701	448602	534007	8.01723e+06	7.0579e+06	5.15223e+06	4.17625e+06	6.52153e+06	7.50489e+06	553599	508459	524847	6.96306e+06	7.09914e+06	7.95843e+06	5.42516e+06	5.74773e+06	4.85773e+06	1	1	1	12.5778	13.9621	15.1633	9.79981	11.3042	9.25552
AIM45	Q12480	Probable electron transfer flavoprotein subunit alpha, mitochondrial OS=Saccharomyces cerevisiae (strain ATCC 204508 / S288c) GN=AIM45 PE=1 SV=1	1	1	3	3	3	5.47869	1356700	1132160	429579	2390010	2595260	1115360	1634110	3215620	2589390	1.23122e+06	847289	632508	2.16897e+06	1.94225e+06	1.64225e+06	1.48298e+06	2.40651e+06	3.81259e+06	1.10524e+06	960342	621658	1.88377e+06	1.9536e+06	2.53671e+06	1.92646e+06	2.12097e+06	2.4678e+06	1	1	1	1.7044	2.03427	4.08055	1.74302	2.20856	3.9697
YNG1	Q08465	Protein YNG1 OS=Saccharomyces cerevisiae (strain ATCC 204508 / S288c) GN=YNG1 PE=1 SV=1	1	1	3	3	4	5.93867	654805	1410340	770728	8506460	9567040	2081140	15893800	18989700	18274100	651710	984969	1.10882e+06	8.46625e+06	6.68154e+06	2.99406e+06	1.58187e+07	1.32622e+07	2.62903e+07	585025	1.11639e+06	1.0898e+06	7.35304e+06	6.72058e+06	4.6248e+06	2.05492e+07	1.16886e+07	1.7017e+07	1	1	1	12.5688	6.01991	4.24372	35.1254	10.47	15.6149
TAF6	P53040	Transcription initiation factor TFIID subunit 6 OS=Saccharomyces cerevisiae (strain ATCC 204508 / S288c) GN=TAF6 PE=1 SV=1	1	1	3	3	4	5.8291	816430	2389270	892080	5555010	6484170	3129590	6704450	8549910	7857980	927214	1.66145e+06	1.12959e+06	6.30879e+06	4.50897e+06	3.96281e+06	7.6142e+06	5.94545e+06	9.95009e+06	832339	1.88314e+06	1.11021e+06	5.47926e+06	4.53532e+06	6.12119e+06	9.89122e+06	5.24e+06	6.44045e+06	1	1	1	6.58297	2.40838	5.51354	11.8837	2.78258	5.80111
LSC1	P53598	Succinyl-CoA ligase [ADP-forming] subunit alpha, mitochondrial OS=Saccharomyces cerevisiae (strain ATCC 204508 / S288c) GN=LSC1 PE=1 SV=1	1	1	3	3	2	6.3732	2382520	1832030	1974260	9588500	9840370	4456610	7775340	12513200	11978800	2.30878e+06	1.63937e+06	2.27674e+06	9.29175e+06	8.80555e+06	5.13941e+06	7.5347e+06	1.11973e+07	1.38141e+07	2.07254e+06	1.85811e+06	2.23768e+06	8.07e+06	8.857e+06	7.93862e+06	9.78796e+06	9.8687e+06	8.94151e+06	1	1	1	3.89377	4.76667	3.5477	4.72268	5.31114	3.99588
ALD4	P46367	Potassium-activated aldehyde dehydrogenase, mitochondrial OS=Saccharomyces cerevisiae (strain ATCC 204508 / S288c) GN=ALD4 PE=1 SV=2	1	1	3	3	8	7.36024	7382570	4853290	3173230	62836100	38570300	26428500	28682200	43301500	48736000	6.12825e+06	4.75237e+06	3.9039e+06	5.216e+07	3.77683e+07	3.25139e+07	2.3809e+07	4.24011e+07	5.9958e+07	5.50119e+06	5.38648e+06	3.83693e+06	4.53016e+07	3.7989e+07	5.02229e+07	3.09291e+07	3.73701e+07	3.88093e+07	1	1	1	8.23488	7.05266	13.0893	5.62226	6.93775	10.1147
ADE12	P80210	Adenylosuccinate synthetase OS=Saccharomyces cerevisiae (strain ATCC 204508 / S288c) GN=ADE12 PE=1 SV=3	1	1	3	3	6	6.69806	15697700	7406540	8302070	28435500	30652100	23231100	25436400	38121900	37261400	1.44765e+07	7.47731e+06	8.91718e+06	2.62234e+07	3.0945e+07	2.49523e+07	2.34577e+07	3.84861e+07	4.00222e+07	1.29953e+07	8.475e+06	8.76422e+06	2.27754e+07	3.11258e+07	3.85428e+07	3.04727e+07	3.39196e+07	2.59054e+07	1	1	1	1.75259	3.67266	4.39775	2.34491	4.00231	2.95581
IDH1	P28834	Isocitrate dehydrogenase [NAD] subunit 1, mitochondrial OS=Saccharomyces cerevisiae (strain ATCC 204508 / S288c) GN=IDH1 PE=1 SV=2	1	1	3	3	4	5.76468	3201260	2361550	1374150	6245370	7209510	5128360	5329960	8286120	7141680	3.03851e+06	2.04136e+06	1.67483e+06	5.92786e+06	6.23202e+06	6.25051e+06	5.05899e+06	7.16266e+06	8.70437e+06	2.7276e+06	2.31374e+06	1.6461e+06	5.14842e+06	6.26844e+06	9.6549e+06	6.57188e+06	6.31278e+06	5.63412e+06	1	1	1	1.88753	2.70922	5.86531	2.4094	2.72839	3.42271
LAT1	P12695	Dihydrolipoyllysine-residue acetyltransferase component of pyruvate dehydrogenase complex, mitochondrial OS=Saccharomyces cerevisiae (strain ATCC 204508 / S288c) GN=LAT1 PE=1 SV=1	1	1	3	3	10	6.83723	11275200	10336100	7326340	51804600	66313600	37109900	46708200	71592000	65680800	1.14815e+07	8.65469e+06	8.59247e+06	5.27524e+07	5.55261e+07	4.35232e+07	4.75628e+07	5.99459e+07	7.70317e+07	1.03067e+07	9.80948e+06	8.44508e+06	4.58161e+07	5.58506e+07	6.72285e+07	6.17864e+07	5.28331e+07	4.98607e+07	1	1	1	4.44529	5.69353	7.96067	5.9948	5.38592	5.90412
RPL32	P38061	60S ribosomal protein L32 OS=Saccharomyces cerevisiae (strain ATCC 204508 / S288c) GN=RPL32 PE=1 SV=1	1	1	3	3	8	7.94422	5704110	9537100	7226050	219585000	199130000	20497700	96246700	107565000	136945000	4.96175e+06	6.95848e+06	1.13856e+07	1.91007e+08	1.4529e+08	3.22969e+07	8.37207e+07	7.84818e+07	2.15775e+08	4.45405e+06	7.88694e+06	1.11903e+07	1.65892e+08	1.46139e+08	4.98876e+07	1.08757e+08	6.91696e+07	1.39666e+08	1	1	1	37.2452	18.5292	4.45811	24.4176	8.77014	12.481
MRPL16	P38064	54S ribosomal protein L16, mitochondrial OS=Saccharomyces cerevisiae (strain ATCC 204508 / S288c) GN=MRPL16 PE=1 SV=1	1	1	3	3	4	6.47882	1317520	1498650	1368270	19110700	20884600	4026240	9285360	15176900	13821800	1.25844e+06	1.13019e+06	1.89953e+06	1.82538e+07	1.57498e+07	5.58951e+06	8.86899e+06	1.14455e+07	1.91884e+07	1.12967e+06	1.28099e+06	1.86695e+06	1.58536e+07	1.58419e+07	8.63389e+06	1.15213e+07	1.00874e+07	1.24202e+07	1	1	1	14.0338	12.3669	4.62461	10.1988	7.87472	6.65268
KAP95	Q06142	Importin subunit beta-1 OS=Saccharomyces cerevisiae (strain ATCC 204508 / S288c) GN=KAP95 PE=1 SV=1	1	1	3	3	4	6.38918	2042540	1752110	1597850	16364200	22685000	13911700	8120950	15790100	11860700	2.23466e+06	1.44965e+06	1.76519e+06	1.79034e+07	1.8769e+07	1.53687e+07	8.8848e+06	1.30644e+07	1.31029e+07	2.006e+06	1.64308e+06	1.73491e+06	1.55493e+07	1.88787e+07	2.37393e+07	1.15418e+07	1.15142e+07	8.48116e+06	1	1	1	7.7514	11.4898	13.6833	5.75363	7.0077	4.88853
PCT1	P13259	Choline-phosphate cytidylyltransferase OS=Saccharomyces cerevisiae (strain ATCC 204508 / S288c) GN=PCT1 PE=1 SV=2	1	1	3	3	2	5.95527	705446	536364	237491	4331770	4585870	1214130	3124820	7621670	5716670	625533	379828	378210	3.84107e+06	3.2475e+06	1.93353e+06	2.77084e+06	5.39731e+06	9.10394e+06	561527	430508	371722	3.33601e+06	3.26648e+06	2.98664e+06	3.59946e+06	4.7569e+06	5.89275e+06	1	1	1	5.94097	7.58749	8.03461	6.41013	11.0495	15.8526
RPL21A|RPL21B	Q02753|Q12672	60S ribosomal protein L21-A OS=Saccharomyces cerevisiae (strain ATCC 204508 / S288c) GN=RPL21A PE=1 SV=1|60S ribosomal protein L21-B OS=Saccharomyces cerevisiae (strain ATCC 204508 / S288c) GN=RPL21B PE=1 SV=1	1	1	3	3	6	7.5474	12932500	10624600	11099300	142902000	168204000	32966500	43418600	71111800	66148100	1.19134e+07	8.39656e+06	1.52459e+07	1.31641e+08	1.32931e+08	4.52825e+07	3.99972e+07	5.61993e+07	9.08604e+07	1.06944e+07	9.51691e+06	1.49844e+07	1.14332e+08	1.33707e+08	6.99459e+07	5.19584e+07	4.9531e+07	5.88117e+07	1	1	1	10.6908	14.0495	4.66793	4.85847	5.20452	3.92487
HIR3	P47171	Histone transcription regulator 3 OS=Saccharomyces cerevisiae (strain ATCC 204508 / S288c) GN=HIR3 PE=1 SV=1	1	1	3	3	10	6.58194	3053570	6358560	4437290	25011400	21818500	7250170	26181100	40512000	38750000	3.24997e+06	4.79533e+06	5.52825e+06	2.662e+07	1.64545e+07	9.0327e+06	2.7865e+07	3.05523e+07	4.82771e+07	2.91742e+06	5.43517e+06	5.43341e+06	2.31198e+07	1.65506e+07	1.39524e+07	3.6198e+07	2.69271e+07	3.12486e+07	1	1	1	7.92476	3.0451	2.56789	12.4075	4.95424	5.75119
BAT2	P47176	Branched-chain-amino-acid aminotransferase, cytosolic OS=Saccharomyces cerevisiae (strain ATCC 204508 / S288c) GN=BAT2 PE=1 SV=1	1	1	3	3	2	6.06392	3472110	2113270	876680	11400000	8630360	4070580	8153440	6951800	11938700	2.49919e+06	2.07689e+06	1.2393e+06	8.20562e+06	8.4818e+06	5.75428e+06	5.86877e+06	6.83213e+06	1.68769e+07	2.24347e+06	2.35401e+06	1.21804e+06	7.12668e+06	8.53136e+06	8.88839e+06	7.62383e+06	6.02147e+06	1.0924e+07	1	1	1	3.17663	3.62418	7.2973	3.39823	2.55796	8.9685
GGA1	Q06336	ADP-ribosylation factor-binding protein GGA1 OS=Saccharomyces cerevisiae (strain ATCC 204508 / S288c) GN=GGA1 PE=1 SV=1	1	1	3	3	2	5.48592	1048850	668794	405550	2580370	2103480	1502690	2129460	3664610	2864670	907202	600369	522309	2.23189e+06	1.88827e+06	1.93532e+06	1.84188e+06	3.28968e+06	3.68942e+06	814375	680476	513349	1.93842e+06	1.89931e+06	2.9894e+06	2.39269e+06	2.89935e+06	2.38807e+06	1	1	1	2.38026	2.79114	5.82334	2.93807	4.26076	4.65194
RPL36B	O14455	60S ribosomal protein L36-B OS=Saccharomyces cerevisiae (strain ATCC 204508 / S288c) GN=RPL36B PE=1 SV=3	1	1	3	3	6	7.29962	2616010	2811020	3564390	76540100	89915400	14200300	33706400	34444500	43826200	2.37812e+06	2.34747e+06	4.69521e+06	6.95799e+07	7.50879e+07	1.87054e+07	3.06413e+07	2.87644e+07	5.77302e+07	2.13479e+06	2.66069e+06	4.61467e+06	6.0431e+07	7.55266e+07	2.88934e+07	3.98046e+07	2.53514e+07	3.73674e+07	1	1	1	28.3078	28.3861	6.26122	18.6457	9.52814	8.09752
SUP35	P05453	Eukaryotic peptide chain release factor GTP-binding subunit OS=Saccharomyces cerevisiae (strain ATCC 204508 / S288c) GN=SUP35 PE=1 SV=1	1	1	3	3	5	6.44108	2288920	1648380	1441390	18877600	21945900	6585950	16028000	30473700	28562600	2.17175e+06	1.3395e+06	1.86945e+06	1.79113e+07	1.78337e+07	8.54184e+06	1.52076e+07	2.47635e+07	3.70451e+07	1.94953e+06	1.51823e+06	1.83738e+06	1.55562e+07	1.79379e+07	1.31942e+07	1.97554e+07	2.18252e+07	2.39784e+07	1	1	1	7.97943	11.815	7.18098	10.1334	14.3754	13.0503
ACH1	P32316	Acetyl-CoA hydrolase OS=Saccharomyces cerevisiae (strain ATCC 204508 / S288c) GN=ACH1 PE=1 SV=2	1	1	3	3	12	7.1744	6258570	4895570	3636640	63762900	70190500	21144000	27624000	57183900	46890300	5.89438e+06	3.80269e+06	4.97107e+06	6.00525e+07	5.45213e+07	2.89026e+07	2.60165e+07	4.44183e+07	6.40962e+07	5.29125e+06	4.31008e+06	4.88579e+06	5.21563e+07	5.48399e+07	4.46446e+07	3.37968e+07	3.91479e+07	4.14879e+07	1	1	1	9.85709	12.7236	9.13763	6.3873	9.08286	8.49154
SEC26	P41810	Coatomer subunit beta OS=Saccharomyces cerevisiae (strain ATCC 204508 / S288c) GN=SEC26 PE=1 SV=2	1	1	3	3	2	5.68248	563906	431009	378562	2374660	1794910	1096370	1313690	2398720	2281860	529548	397603	436994	2.22998e+06	1.65579e+06	1.2656e+06	1.23365e+06	2.2128e+06	2.63407e+06	475363	450655	429498	1.93676e+06	1.66547e+06	1.95491e+06	1.60257e+06	1.95024e+06	1.70497e+06	1	1	1	4.07428	3.69566	4.55163	3.37126	4.32758	3.96968
SEC27	P41811	Coatomer subunit beta' OS=Saccharomyces cerevisiae (strain ATCC 204508 / S288c) GN=SEC27 PE=1 SV=1	1	1	3	3	4	5.82776	1272320	1534000	926169	5336880	4861340	2703350	3289270	6845040	5674830	1.32634e+06	1.21402e+06	1.12261e+06	5.56349e+06	3.84731e+06	3.27673e+06	3.42893e+06	5.41723e+06	6.87847e+06	1.19063e+06	1.37601e+06	1.10335e+06	4.83195e+06	3.86979e+06	5.06143e+06	4.45436e+06	4.77446e+06	4.45226e+06	1	1	1	4.05833	2.81233	4.58732	3.74118	3.46979	4.03521
HTA1|HTA2	P04911|P04912	Histone H2A.1 OS=Saccharomyces cerevisiae (strain ATCC 204508 / S288c) GN=HTA1 PE=1 SV=2|Histone H2A.2 OS=Saccharomyces cerevisiae (strain ATCC 204508 / S288c) GN=HTA2 PE=1 SV=2	1	1	3	3	4	7.63201	1192840	4935300	2908810	142773000	148892000	18028900	249812000	230866000	191619000	1.18493e+06	3.09164e+06	4.67445e+06	1.41826e+08	9.32709e+07	2.89724e+07	2.48155e+08	1.44622e+08	3.07932e+08	1.06368e+06	3.50415e+06	4.59427e+06	1.23177e+08	9.3816e+07	4.47525e+07	3.22366e+08	1.27462e+08	1.99317e+08	1	1	1	115.803	26.7728	9.74094	303.066	36.3746	43.3837
GGA2	P38817	ADP-ribosylation factor-binding protein GGA2 OS=Saccharomyces cerevisiae (strain ATCC 204508 / S288c) GN=GGA2 PE=1 SV=1	1	1	3	3	2	5.76612	1242820	1401930	586508	4586850	5686620	3267020	3110310	4763920	4943070	1.26157e+06	1.10396e+06	733742	4.65603e+06	4.47799e+06	4.08716e+06	3.15722e+06	3.7514e+06	6.18396e+06	1.13248e+06	1.25127e+06	721156	4.04382e+06	4.50416e+06	6.31326e+06	4.10139e+06	3.30628e+06	4.00272e+06	1	1	1	3.57077	3.59968	8.75437	3.62161	2.64235	5.55043
CSE4	P36012	Histone H3-like centromeric protein CSE4 OS=Saccharomyces cerevisiae (strain ATCC 204508 / S288c) GN=CSE4 PE=1 SV=2	1	1	3	3	4	6.09099	1736020	1840300	2429620	5429950	8211790	2201320	9029590	15114200	12785800	1.89071e+06	1.44232e+06	2.84641e+06	5.91378e+06	6.4359e+06	2.57895e+06	9.83416e+06	1.18456e+07	1.49791e+07	1.69724e+06	1.63476e+06	2.79758e+06	5.13619e+06	6.47351e+06	3.98359e+06	1.27751e+07	1.04401e+07	9.69563e+06	1	1	1	3.02619	3.95991	1.42394	7.52695	6.38629	3.46572
YGR169C-A	Q3E772	Uncharacterized protein YGR169C-A OS=Saccharomyces cerevisiae (strain ATCC 204508 / S288c) GN=YGR169C-A PE=4 SV=1	1	1	3	3	4	6.23304	1803680	1969950	1743030	30665000	29481200	5634990	16930300	23548800	21530300	1.59454e+06	1.53496e+06	2.53039e+06	2.71093e+07	2.29714e+07	8.18042e+06	1.49672e+07	1.83489e+07	3.12559e+07	1.43138e+06	1.73977e+06	2.48698e+06	2.35448e+07	2.31056e+07	1.26359e+07	1.94431e+07	1.61718e+07	2.02312e+07	1	1	1	16.449	13.2809	5.08084	13.5835	9.29535	8.13484
TFC6	Q06339	Transcription factor tau 91 kDa subunit OS=Saccharomyces cerevisiae (strain ATCC 204508 / S288c) GN=TFC6 PE=1 SV=1	1	1	3	3	3	6.17854	784397	560480	427476	12156800	13826000	2533260	9367500	16088500	12674400	661058	422668	672618	1.02453e+07	1.04264e+07	3.986e+06	7.89455e+06	1.21326e+07	1.99427e+07	593417	479064	661080	8.89813e+06	1.04874e+07	6.157e+06	1.02554e+07	1.0693e+07	1.29084e+07	1	1	1	14.9947	21.8913	9.31354	17.282	22.3207	19.5263
RSC9	Q03124	Chromatin structure-remodeling complex subunit RSC9 OS=Saccharomyces cerevisiae (strain ATCC 204508 / S288c) GN=RSC9 PE=1 SV=1	1	1	3	3	2	5.52529	427565	1341930	507597	5410370	4623270	1813400	3253440	5166970	5349490	479134	927692	655224	6.06292e+06	3.19612e+06	2.3408e+06	3.64584e+06	3.57199e+06	6.90531e+06	430108	1.05147e+06	643984	5.26572e+06	3.2148e+06	3.61574e+06	4.73613e+06	3.14816e+06	4.46964e+06	1	1	1	12.2428	3.05742	5.61463	11.0115	2.99404	6.9406
RAP1	P11938	DNA-binding protein RAP1 OS=Saccharomyces cerevisiae (strain ATCC 204508 / S288c) GN=RAP1 PE=1 SV=2	1	1	3	3	8	7.06334	2262310	8075130	2656370	13361400	14938900	4127180	19259600	28539800	24892500	2.5337e+06	5.00107e+06	3.82976e+06	1.49642e+07	9.25193e+06	5.95027e+06	2.157e+07	1.76752e+07	3.58882e+07	2.27444e+06	5.66836e+06	3.76407e+06	1.29966e+07	9.30599e+06	9.19113e+06	2.80205e+07	1.5578e+07	2.32296e+07	1	1	1	5.7142	1.64174	2.44181	12.3197	2.74823	6.1714
TIF5	P38431|P38431-2	Eukaryotic translation initiation factor 5 OS=Saccharomyces cerevisiae (strain ATCC 204508 / S288c) GN=TIF5 PE=1 SV=1|Isoform Short of Eukaryotic translation initiation factor 5 OS=Saccharomyces cerevisiae (strain ATCC 204508 / S288c) GN=TIF5	1	1	3	3	5	6.14062	1386530	1515510	1485230	5997750	9071850	3661870	5017610	9024270	6884340	1.54627e+06	1.17534e+06	1.71725e+06	6.68873e+06	7.03559e+06	4.23393e+06	5.59567e+06	6.99869e+06	7.95981e+06	1.38805e+06	1.33216e+06	1.68779e+06	5.80924e+06	7.0767e+06	6.53997e+06	7.26905e+06	6.16826e+06	5.15219e+06	1	1	1	4.18519	5.31218	3.87486	5.23689	4.63026	3.05262
TPS2	P31688	Trehalose-phosphatase OS=Saccharomyces cerevisiae (strain ATCC 204508 / S288c) GN=TPS2 PE=1 SV=3	1	1	3	3	5	6.39946	6196940	4040760	3100440	12487400	14321200	10395700	10045700	12200100	13311300	5.73917e+06	3.86434e+06	3.50057e+06	1.15649e+07	1.3696e+07	1.17373e+07	9.30362e+06	1.16675e+07	1.50292e+07	5.15192e+06	4.37996e+06	3.44052e+06	1.00443e+07	1.3776e+07	1.81302e+07	1.20859e+07	1.02831e+07	9.72804e+06	1	1	1	1.94962	3.14523	5.2696	2.3459	2.34775	2.82749
PUF6	Q04373	Pumilio homology domain family member 6 OS=Saccharomyces cerevisiae (strain ATCC 204508 / S288c) GN=PUF6 PE=1 SV=1	1	1	3	3	5	6.47871	1869260	3060620	7642420	21706100	26541900	5962600	13082600	27642300	20521400	2.33664e+06	2.3656e+06	7.91001e+06	2.71334e+07	2.05146e+07	6.17137e+06	1.63537e+07	2.13652e+07	2.12399e+07	2.09755e+06	2.68124e+06	7.77432e+06	2.35657e+07	2.06345e+07	9.53266e+06	2.12443e+07	1.88301e+07	1.37481e+07	1	1	1	11.2349	7.69588	1.22617	10.1282	7.0229	1.7684
XDJ1	P39102	DnaJ protein homolog XDJ1 OS=Saccharomyces cerevisiae (strain ATCC 204508 / S288c) GN=XDJ1 PE=1 SV=2	1	1	3	3	5	6.11724	4258070	3093500	2044900	24637900	29354400	10077900	11568200	18603000	17789500	3.86729e+06	2.51634e+06	2.76795e+06	2.23768e+07	2.38777e+07	1.36413e+07	1.05065e+07	1.51322e+07	2.40796e+07	3.47158e+06	2.8521e+06	2.72047e+06	1.94345e+07	2.40172e+07	2.10712e+07	1.36485e+07	1.33367e+07	1.55862e+07	1	1	1	5.59818	8.42091	7.74542	3.9315	4.67611	5.72922
RPL28	P02406	60S ribosomal protein L28 OS=Saccharomyces cerevisiae (strain ATCC 204508 / S288c) GN=RPL28 PE=1 SV=3	1	1	3	3	6	6.79309	2568530	2483780	1545310	37434600	33000700	4160510	10576900	13807700	16870800	2.02695e+06	1.89143e+06	2.57146e+06	2.95414e+07	2.51305e+07	6.92326e+06	8.34673e+06	1.05148e+07	2.80737e+07	1.81955e+06	2.1438e+06	2.52735e+06	2.56571e+07	2.52773e+07	1.06941e+07	1.08428e+07	9.26713e+06	1.81714e+07	1	1	1	14.1008	11.7909	4.23134	5.95908	4.32275	7.18991
TKL1	P23254	Transketolase 1 OS=Saccharomyces cerevisiae (strain ATCC 204508 / S288c) GN=TKL1 PE=1 SV=4	1	1	3	3	10	6.63938	5712060	3722190	4089390	45080200	34386800	27662600	26200700	28293900	40048400	5.09979e+06	4.0891e+06	4.16936e+06	4.02481e+07	3.77764e+07	2.82036e+07	2.33923e+07	3.10829e+07	4.08316e+07	4.57797e+06	4.63471e+06	4.09784e+06	3.4956e+07	3.79972e+07	4.35649e+07	3.03877e+07	2.73948e+07	2.64293e+07	1	1	1	7.6357	8.1984	10.6312	6.63783	5.9108	6.44956
ADE6	P38972	Phosphoribosylformylglycinamidine synthase OS=Saccharomyces cerevisiae (strain ATCC 204508 / S288c) GN=ADE6 PE=1 SV=2	1	1	3	3	2	5.60782	419967	306374	384311	2393380	2242500	1041140	1679500	1946970	2409190	384545	303160	424160	2.19151e+06	2.21898e+06	1.1491e+06	1.53784e+06	1.92655e+06	2.659e+06	345198	343611	416884	1.90336e+06	2.23194e+06	1.77496e+06	1.99774e+06	1.69795e+06	1.7211e+06	1	1	1	5.51382	6.49556	4.25768	5.78723	4.94151	4.1285
YMR027W	Q04371	Protein-glutamate O-methyltransferase OS=Saccharomyces cerevisiae (strain ATCC 204508 / S288c) GN=YMR027W PE=1 SV=1	1	1	3	3	3	5.83826	2095710	1306240	976086	11759800	4629380	2355590	3734830	4562650	5221900	1.46186e+06	1.36148e+06	1.34253e+06	8.20304e+06	4.82515e+06	3.23994e+06	2.60523e+06	4.7556e+06	7.18233e+06	1.31228e+06	1.54314e+06	1.3195e+06	7.12444e+06	4.85335e+06	5.0046e+06	3.38432e+06	4.19133e+06	4.64895e+06	1	1	1	5.42906	3.14511	3.79279	2.57897	2.7161	3.52326
GDI1	P39958	Rab GDP-dissociation inhibitor OS=Saccharomyces cerevisiae (strain ATCC 204508 / S288c) GN=GDI1 PE=1 SV=1	1	1	3	3	4	6.20966	2013230	2859230	1669040	9193350	8718510	3693640	9840160	21406800	16836900	2.13126e+06	2.11528e+06	2.13111e+06	9.73233e+06	6.45002e+06	4.71621e+06	1.04171e+07	1.58369e+07	2.14981e+07	1.91318e+06	2.39752e+06	2.09455e+06	8.45265e+06	6.48771e+06	7.28493e+06	1.35323e+07	1.39578e+07	1.39152e+07	1	1	1	4.41811	2.70601	3.47804	7.07318	5.82176	6.64353
ERG6	P25087	Sterol 24-C-methyltransferase OS=Saccharomyces cerevisiae (strain ATCC 204508 / S288c) GN=ERG6 PE=1 SV=4	1	1	3	3	6	6.55812	11234100	8522500	7064940	31155800	36512300	15916200	21461200	30231900	34156900	1.06913e+07	7.52454e+06	8.4082e+06	2.96505e+07	3.22368e+07	1.89423e+07	2.04243e+07	2.66918e+07	4.06512e+07	9.59735e+06	8.52853e+06	8.26396e+06	2.57518e+07	3.24252e+07	2.92595e+07	2.65322e+07	2.35247e+07	2.63125e+07	1	1	1	2.68322	3.80196	3.54061	2.76453	2.75836	3.184
GCD11	P32481	Eukaryotic translation initiation factor 2 subunit gamma OS=Saccharomyces cerevisiae (strain ATCC 204508 / S288c) GN=GCD11 PE=1 SV=1	1	1	3	3	3	6.06804	1037190	643604	939005	7713080	7321550	4563100	6403660	10362000	8666060	995434	627657	1.00325e+06	7.40256e+06	7.14014e+06	4.87531e+06	6.14585e+06	1.01053e+07	9.259e+06	893578	711405	986043	6.42921e+06	7.18186e+06	7.53069e+06	7.98377e+06	8.90623e+06	5.99312e+06	1	1	1	7.19491	10.0953	7.63728	8.93461	12.5192	6.07795
HIR2	P32480	Protein HIR2 OS=Saccharomyces cerevisiae (strain ATCC 204508 / S288c) GN=HIR2 PE=1 SV=2	1	1	3	3	10	6.67783	3065440	3616160	3159730	33257700	26537100	5691710	37450700	54770200	48028600	2.69276e+06	2.85553e+06	4.55519e+06	2.92144e+07	2.09552e+07	8.20538e+06	3.28977e+07	4.32497e+07	6.92398e+07	2.41723e+06	3.23654e+06	4.47705e+06	2.53731e+07	2.10777e+07	1.26745e+07	4.27357e+07	3.81179e+07	4.48172e+07	1	1	1	10.4968	6.51241	2.831	17.6796	11.7774	10.0105
MPH1	P40562	ATP-dependent DNA helicase MPH1 OS=Saccharomyces cerevisiae (strain ATCC 204508 / S288c) GN=MPH1 PE=1 SV=1	1	1	3	3	2	5.65829	738709	762757	606420	2588560	3235540	1145700	3198180	6815820	4291050	763182	562430	796044	2.67432e+06	2.38577e+06	1.50395e+06	3.30413e+06	5.02574e+06	5.63283e+06	685090	637475	782388	2.32268e+06	2.39971e+06	2.32309e+06	4.29223e+06	4.42942e+06	3.64599e+06	1	1	1	3.39032	3.76441	2.96923	6.26521	6.94839	4.66008
RPL9B	P51401	60S ribosomal protein L9-B OS=Saccharomyces cerevisiae (strain ATCC 204508 / S288c) GN=RPL9B PE=1 SV=1	1	1	3	3	7	7.3492	4523480	3052140	4824590	36085000	40414100	17649000	23649500	36206700	34579500	4.46105e+06	2.86726e+06	5.20754e+06	3.5587e+07	3.79661e+07	1.90499e+07	2.33231e+07	3.40136e+07	3.73242e+07	4.00458e+06	3.24984e+06	5.11821e+06	3.09077e+07	3.8188e+07	2.94255e+07	3.02979e+07	2.99777e+07	2.41591e+07	1	1	1	7.71809	11.7507	5.74919	7.5658	9.22437	4.72022
RIM4	P38741	Meiotic activator RIM4 OS=Saccharomyces cerevisiae (strain ATCC 204508 / S288c) GN=RIM4 PE=1 SV=1	1	1	3	3	9	7.0502	2228200	2426370	1648730	32850600	32185200	12572800	12898700	31743800	20736000	2.27282e+06	1.79401e+06	2.18611e+06	3.35084e+07	2.37971e+07	1.66707e+07	1.3157e+07	2.34707e+07	2.74946e+07	2.04025e+06	2.03338e+06	2.14861e+06	2.91024e+07	2.39361e+07	2.57506e+07	1.70916e+07	2.06858e+07	1.77966e+07	1	1	1	14.2641	11.7716	11.9848	8.37717	10.1731	8.28284
GCV1	P48015	Aminomethyltransferase, mitochondrial OS=Saccharomyces cerevisiae (strain ATCC 204508 / S288c) GN=GCV1 PE=1 SV=2	1	1	3	3	2	6.43167	4475170	2719250	1461000	9968320	10071500	3771300	6212770	11523900	12471000	3.8885e+06	2.26263e+06	2.02076e+06	8.66153e+06	8.38027e+06	5.21621e+06	5.39831e+06	9.58878e+06	1.7249e+07	3.49062e+06	2.56453e+06	1.98609e+06	7.52264e+06	8.42924e+06	8.05726e+06	7.01267e+06	8.45103e+06	1.11649e+07	1	1	1	2.1551	3.28686	4.05684	2.00901	3.29536	5.62153
ZIP1	P31111	Synaptonemal complex protein ZIP1 OS=Saccharomyces cerevisiae (strain ATCC 204508 / S288c) GN=ZIP1 PE=1 SV=2	1	1	3	3	24	7.01499	21078200	11537800	10121300	185308000	196148000	45216000	55812000	160122000	103471000	1.88225e+07	8.6976e+06	1.50354e+07	1.65477e+08	1.47863e+08	6.71695e+07	4.98392e+07	1.20706e+08	1.53709e+08	1.68965e+07	9.85811e+06	1.47775e+07	1.43719e+08	1.48727e+08	1.03754e+08	6.47437e+07	1.06383e+08	9.94919e+07	1	1	1	8.50582	15.0868	7.02106	3.83177	10.7915	6.73265
HOM6	P31116	Homoserine dehydrogenase OS=Saccharomyces cerevisiae (strain ATCC 204508 / S288c) GN=HOM6 PE=1 SV=1	1	1	3	3	3	6.08394	1822750	1113770	1231360	12000800	9547950	6332870	8510100	22701300	16883100	1.80532e+06	1.01157e+06	1.36886e+06	1.18861e+07	8.67181e+06	7.04001e+06	8.42874e+06	2.06182e+07	1.87683e+07	1.6206e+06	1.14654e+06	1.34537e+06	1.03232e+07	8.72248e+06	1.08744e+07	1.09494e+07	1.81718e+07	1.21483e+07	1	1	1	6.36999	7.60765	8.08281	6.75637	15.8492	9.02965
EHT1	P38295	Medium-chain fatty acid ethyl ester synthase/esterase 2 OS=Saccharomyces cerevisiae (strain ATCC 204508 / S288c) GN=EHT1 PE=1 SV=1	1	1	3	3	2	5.9868	2639200	876117	403538	3005690	2471370	1813920	2348730	5824140	3408140	2.02121e+06	764200	604088	2.30188e+06	2.15567e+06	2.7154e+06	1.79876e+06	5.08015e+06	5.10191e+06	1.81439e+06	866167	593725	1.99921e+06	2.16827e+06	4.19436e+06	2.33667e+06	4.47737e+06	3.30234e+06	1	1	1	1.10186	2.50329	7.06449	1.28785	5.16918	5.56207
SWC3	P31376	SWR1-complex protein 3 OS=Saccharomyces cerevisiae (strain ATCC 204508 / S288c) GN=SWC3 PE=1 SV=2	1	1	3	3	5	6.2331	1500490	2379900	1168710	14146000	13679000	2854190	14109500	22158900	21002200	1.40783e+06	1.66577e+06	1.77964e+06	1.32725e+07	9.57439e+06	4.34619e+06	1.32382e+07	1.55098e+07	3.19809e+07	1.26378e+06	1.88803e+06	1.74911e+06	1.15273e+07	9.63034e+06	6.71337e+06	1.71971e+07	1.36695e+07	2.07004e+07	1	1	1	9.12129	5.10072	3.83816	13.6077	7.24005	11.8348
SMC3	P47037	Structural maintenance of chromosomes protein 3 OS=Saccharomyces cerevisiae (strain ATCC 204508 / S288c) GN=SMC3 PE=1 SV=1	1	1	3	3	30	7.29899	17064100	21713800	13851100	223943000	192755000	83783600	171165000	212683000	210790000	1.58305e+07	1.81775e+07	1.78351e+07	2.07753e+08	1.61363e+08	1.07882e+08	1.58791e+08	1.78045e+08	2.7142e+08	1.42107e+07	2.06029e+07	1.75292e+07	1.80436e+08	1.62306e+08	1.66641e+08	2.06277e+08	1.5692e+08	1.75683e+08	1	1	1	12.6973	7.87781	9.50652	14.5157	7.61639	10.0223
SCY1	P53009	Protein kinase-like protein SCY1 OS=Saccharomyces cerevisiae (strain ATCC 204508 / S288c) GN=SCY1 PE=1 SV=1	1	1	3	3	4	5.69462	1516400	1212530	890284	6359450	9298250	2752700	3533640	8099630	5636160	1.5304e+06	881013	1.21408e+06	6.41816e+06	6.75602e+06	3.75386e+06	3.56626e+06	5.88512e+06	7.68604e+06	1.3738e+06	998566	1.19326e+06	5.57425e+06	6.7955e+06	5.79843e+06	4.63275e+06	5.18682e+06	4.97498e+06	1	1	1	4.05753	6.80526	4.85934	3.37221	5.19427	4.16925
RSF1	Q05043	Respiration factor 1 OS=Saccharomyces cerevisiae (strain ATCC 204508 / S288c) GN=RSF1 PE=1 SV=1	1	1	3	3	2	5.86691	576207	940686	618971	7478970	7815580	1157670	6706250	16377000	10671200	582478	590970	974650	7.56036e+06	4.91001e+06	1.8229e+06	6.77923e+06	1.02886e+07	1.68032e+07	522877	669823	957930	6.56627e+06	4.9387e+06	2.81576e+06	8.80657e+06	9.06779e+06	1.08763e+07	1	1	1	12.558	7.37314	2.93942	16.8425	13.5376	11.3539
MIR1	P23641	Mitochondrial phosphate carrier protein OS=Saccharomyces cerevisiae (strain ATCC 204508 / S288c) GN=MIR1 PE=1 SV=1	1	1	3	3	4	6.19067	1673040	1727390	852525	18777500	13502800	8393560	8786290	10841700	13534200	1.47482e+06	1.56784e+06	1.06552e+06	1.65528e+07	1.22556e+07	1.04906e+07	7.74531e+06	9.84033e+06	1.69156e+07	1.32391e+06	1.77704e+06	1.04724e+06	1.43763e+07	1.23273e+07	1.62044e+07	1.00615e+07	8.67274e+06	1.0949e+07	1	1	1	10.8589	6.93696	15.4734	7.59985	4.88044	10.4551
RPS4A|RPS4B	P0CX35|P0CX36	40S ribosomal protein S4-A OS=Saccharomyces cerevisiae (strain ATCC 204508 / S288c) GN=RPS4A PE=1 SV=1|40S ribosomal protein S4-B OS=Saccharomyces cerevisiae (strain ATCC 204508 / S288c) GN=RPS4B PE=1 SV=1	1	1	3	3	15	8.13966	25821100	27820300	22920200	433086000	413944000	80863900	192640000	252876000	268465000	2.26885e+07	2.21083e+07	3.28242e+07	3.80544e+08	3.28953e+08	1.15806e+08	1.69269e+08	2.00956e+08	3.84471e+08	2.0367e+07	2.50581e+07	3.22612e+07	3.30507e+08	3.30876e+08	1.78881e+08	2.19889e+08	1.77111e+08	2.48859e+08	1	1	1	16.2276	13.2043	5.54476	10.7964	7.06802	7.71388
RPS30A|RPS30B	P0CX33|P0CX34	40S ribosomal protein S30-A OS=Saccharomyces cerevisiae (strain ATCC 204508 / S288c) GN=RPS30A PE=1 SV=1|40S ribosomal protein S30-B OS=Saccharomyces cerevisiae (strain ATCC 204508 / S288c) GN=RPS30B PE=1 SV=1	1	1	3	3	2	6.3901	720934	529988	712008	4371650	4238640	1337600	5182290	6427500	6950630	643231	492697	858418	3.90047e+06	3.9404e+06	1.61265e+06	4.62374e+06	5.97525e+06	8.37989e+06	577414	558438	843693	3.38761e+06	3.96343e+06	2.49099e+06	6.00647e+06	5.26627e+06	5.4241e+06	1	1	1	5.86686	7.09735	2.95249	10.4024	9.43036	6.42899
RPS24A|RPS24B	P0CX31|P0CX32	40S ribosomal protein S24-A OS=Saccharomyces cerevisiae (strain ATCC 204508 / S288c) GN=RPS24A PE=1 SV=1|40S ribosomal protein S24-B OS=Saccharomyces cerevisiae (strain ATCC 204508 / S288c) GN=RPS24B PE=1 SV=1	1	1	3	3	6	7.29494	1519000	2652220	2470110	95818700	91796800	24544200	63962700	86444900	82632200	1.55244e+06	2.06532e+06	3.10371e+06	9.79283e+07	7.14834e+07	3.08399e+07	6.53709e+07	6.73158e+07	1.03828e+08	1.39359e+06	2.34089e+06	3.05047e+06	8.50519e+07	7.19011e+07	4.76372e+07	8.49201e+07	5.93285e+07	6.72052e+07	1	1	1	61.0307	30.7152	15.6163	60.9361	25.3444	22.0311
RPS23A|RPS23B	P0CX29|P0CX30	40S ribosomal protein S23-A OS=Saccharomyces cerevisiae (strain ATCC 204508 / S288c) GN=RPS23A PE=1 SV=1|40S ribosomal protein S23-B OS=Saccharomyces cerevisiae (strain ATCC 204508 / S288c) GN=RPS23B PE=1 SV=1	1	1	3	3	7	7.83702	7054400	7781230	6092100	150836000	151688000	25938900	74208500	84090900	97689300	6.03581e+06	6.16898e+06	8.98104e+06	1.29057e+08	1.20259e+08	3.82394e+07	6.34934e+07	6.66675e+07	1.44015e+08	5.4182e+06	6.99211e+06	8.82698e+06	1.12087e+08	1.20961e+08	5.90668e+07	8.24811e+07	5.87571e+07	9.32171e+07	1	1	1	20.6872	17.2997	6.69162	15.223	8.40336	10.5605
SEC61	P32915	Protein transport protein SEC61 OS=Saccharomyces cerevisiae (strain ATCC 204508 / S288c) GN=SEC61 PE=1 SV=1	1	1	3	3	4	6.12696	2747410	1733110	1267270	11055400	11394000	6835830	9113880	17806400	14738900	2.58895e+06	1.508e+06	1.54559e+06	1.04178e+07	9.91404e+06	8.33713e+06	8.58823e+06	1.54935e+07	1.79759e+07	2.32404e+06	1.70921e+06	1.51908e+06	9.04796e+06	9.97197e+06	1.2878e+07	1.11565e+07	1.36552e+07	1.16354e+07	1	1	1	3.8932	5.83426	8.47752	4.80049	7.98918	7.65949
RPS6A|RPS6B	P0CX37|P0CX38	40S ribosomal protein S6-A OS=Saccharomyces cerevisiae (strain ATCC 204508 / S288c) GN=RPS6A PE=1 SV=1|40S ribosomal protein S6-B OS=Saccharomyces cerevisiae (strain ATCC 204508 / S288c) GN=RPS6B PE=1 SV=1	1	1	3	3	9	8.28255	7475150	10921100	7179900	83045000	95646200	14599400	49419500	67824800	68434100	6.98047e+06	7.71557e+06	1.08831e+07	7.75494e+07	6.75724e+07	2.21293e+07	4.61491e+07	4.7917e+07	1.0373e+08	6.26621e+06	8.74505e+06	1.06964e+07	6.73526e+07	6.79672e+07	3.41823e+07	5.995e+07	4.22315e+07	6.71422e+07	1	1	1	10.7485	7.77208	3.19568	9.56719	4.82919	6.27708
QCR2	P07257	Cytochrome b-c1 complex subunit 2, mitochondrial OS=Saccharomyces cerevisiae (strain ATCC 204508 / S288c) GN=QCR2 PE=1 SV=1	1	1	3	3	5	6.24538	2335330	1047400	789395	9167270	10075500	6159800	3982320	6203830	5580490	1.99693e+06	978036	988641	7.83888e+06	9.40825e+06	7.71455e+06	3.40526e+06	5.79298e+06	6.98902e+06	1.79259e+06	1.10853e+06	971682	6.80816e+06	9.46322e+06	1.19163e+07	4.4236e+06	5.10562e+06	4.52382e+06	1	1	1	3.79794	8.5367	12.2636	2.46771	4.60574	4.65566
CRC1	Q12289	Mitochondrial carnitine carrier OS=Saccharomyces cerevisiae (strain ATCC 204508 / S288c) GN=CRC1 PE=1 SV=1	1	1	3	3	4	6.04716	2687620	2281480	2553210	14254900	12238500	6417350	6988980	11176400	12105000	2.64408e+06	2.13283e+06	2.77613e+06	1.4024e+07	1.14411e+07	6.97765e+06	6.87576e+06	1.04482e+07	1.31619e+07	2.37353e+06	2.41741e+06	2.72851e+06	1.218e+07	1.1508e+07	1.07781e+07	8.93196e+06	9.20849e+06	8.51936e+06	1	1	1	5.13159	4.76044	3.95017	3.76315	3.80923	3.12235
URA2	P07259	Protein URA2 OS=Saccharomyces cerevisiae (strain ATCC 204508 / S288c) GN=URA2 PE=1 SV=5	1	1	3	3	15	6.59485	7753760	6915340	4479280	47316000	44866100	41977400	42021000	34734600	61251500	7.21379e+06	7.24929e+06	4.59277e+06	4.40209e+07	4.70328e+07	4.3041e+07	3.90947e+07	3.6412e+07	6.28034e+07	6.47565e+06	8.21656e+06	4.51399e+06	3.82327e+07	4.73076e+07	6.64836e+07	5.07859e+07	3.20916e+07	4.06511e+07	1	1	1	5.90407	5.75759	14.7284	7.8426	3.90572	9.00559
UBA1	P22515	Ubiquitin-activating enzyme E1 1 OS=Saccharomyces cerevisiae (strain ATCC 204508 / S288c) GN=UBA1 PE=1 SV=2	1	1	3	3	2	5.83929	704402	1002430	844526	5978010	4549990	2862620	3718780	4303350	5890460	714721	943348	884462	6.06558e+06	4.28182e+06	2.99799e+06	3.77326e+06	4.04972e+06	6.16901e+06	641588	1.06922e+06	869290	5.26803e+06	4.30684e+06	4.63087e+06	4.90165e+06	3.5692e+06	3.99305e+06	1	1	1	8.21092	4.02803	5.32718	7.63987	3.33814	4.59346
BRN1	P38170	Condensin complex subunit 2 OS=Saccharomyces cerevisiae (strain ATCC 204508 / S288c) GN=BRN1 PE=1 SV=3	1	1	3	3	6	5.84866	1982950	2031930	1754680	11648700	11041500	4210530	10990100	14046300	14613600	1.8471e+06	1.7611e+06	2.17342e+06	1.08507e+07	9.56983e+06	5.21533e+06	1.02372e+07	1.21741e+07	1.8101e+07	1.6581e+06	1.99609e+06	2.13613e+06	9.42393e+06	9.62575e+06	8.0559e+06	1.32986e+07	1.07296e+07	1.17163e+07	1	1	1	5.68357	4.82231	3.77125	8.02039	5.37533	5.48483
CPA2	P03965	Carbamoyl-phosphate synthase arginine-specific large chain OS=Saccharomyces cerevisiae (strain ATCC 204508 / S288c) GN=CPA2 PE=1 SV=1	1	1	3	3	2	5.93697	3395080	1761710	671012	4479120	4090330	2533750	7004260	7919130	10424600	2.59535e+06	1.65816e+06	932596	3.42404e+06	3.8499e+06	3.52149e+06	5.35437e+06	7.45364e+06	1.44885e+07	2.32979e+06	1.8794e+06	916598	2.97382e+06	3.87239e+06	5.4395e+06	6.95559e+06	6.56924e+06	9.37803e+06	1	1	1	1.27643	2.06044	5.93445	2.98551	3.49539	10.2313
CDC12	P32468	Cell division control protein 12 OS=Saccharomyces cerevisiae (strain ATCC 204508 / S288c) GN=CDC12 PE=1 SV=1	1	1	3	3	5	6.44737	2369610	1750810	1691350	13486100	14070100	3862480	8007990	20512700	13352900	2.26763e+06	1.3355e+06	2.31704e+06	1.29057e+07	1.07325e+07	5.29134e+06	7.66336e+06	1.56469e+07	1.82926e+07	2.0356e+06	1.51369e+06	2.27729e+06	1.12088e+07	1.07952e+07	8.17331e+06	9.95509e+06	1.37903e+07	1.18403e+07	1	1	1	5.50637	7.13172	3.58905	4.89049	9.11037	5.19931
RTG2	P32608	Retrograde regulation protein 2 OS=Saccharomyces cerevisiae (strain ATCC 204508 / S288c) GN=RTG2 PE=1 SV=2	1	1	3	3	3	5.79359	917720	1040320	1484420	3441080	4022660	1669290	2723110	5166680	4115320	1.03616e+06	863792	1.58343e+06	3.88518e+06	3.34007e+06	1.78063e+06	3.07455e+06	4.28996e+06	4.38981e+06	930136	979047	1.55627e+06	3.37432e+06	3.35959e+06	2.75046e+06	3.99399e+06	3.78094e+06	2.84142e+06	1	1	1	3.62777	3.43149	1.76735	4.29399	3.86186	1.82579
ACS1	Q01574	Acetyl-coenzyme A synthetase 1 OS=Saccharomyces cerevisiae (strain ATCC 204508 / S288c) GN=ACS1 PE=1 SV=2	1	1	3	3	12	7.25762	15361300	13326000	10287700	110981000	94968800	39216200	48472300	83330300	86306200	1.43381e+07	1.14672e+07	1.28084e+07	1.03589e+08	8.17221e+07	4.88251e+07	4.52436e+07	7.1707e+07	1.07453e+08	1.2871e+07	1.29973e+07	1.25887e+07	8.99679e+07	8.21997e+07	7.54182e+07	5.87737e+07	6.31987e+07	6.95519e+07	1	1	1	6.98999	6.32437	5.99093	4.56637	4.86245	5.52494
TOR2	P32600	Serine/threonine-protein kinase TOR2 OS=Saccharomyces cerevisiae (strain ATCC 204508 / S288c) GN=TOR2 PE=1 SV=3	1	1	3	3	3	5.62532	930225	552670	299580	4922890	7841810	2391040	1533500	2241560	2133400	814061	434065	435868	4.30813e+06	6.15893e+06	3.4788e+06	1.342e+06	1.76051e+06	3.10395e+06	730764	491982	428391	3.74167e+06	6.19492e+06	5.37355e+06	1.74333e+06	1.55162e+06	2.00911e+06	1	1	1	5.12021	12.5918	12.5436	2.38562	3.15382	4.6899
PET127	P32606	Putative mitochondrial translation system component PET127 OS=Saccharomyces cerevisiae (strain ATCC 204508 / S288c) GN=PET127 PE=1 SV=2	1	1	3	3	3	5.61464	1858440	1671410	1365310	8168940	8216790	2856610	4393270	5940930	7144120	1.72487e+06	1.45048e+06	1.6951e+06	7.58181e+06	7.13067e+06	3.54663e+06	4.07751e+06	5.15564e+06	8.86979e+06	1.54837e+06	1.64401e+06	1.66602e+06	6.5849e+06	7.17234e+06	5.47832e+06	5.29689e+06	4.5439e+06	5.7412e+06	1	1	1	4.25278	4.3627	3.28826	3.42094	2.76391	3.44605
RPL24B	P24000	60S ribosomal protein L24-B OS=Saccharomyces cerevisiae (strain ATCC 204508 / S288c) GN=RPL24B PE=1 SV=1	1	1	3	3	2	6.54704	9465100	6852680	7791510	47071200	43739200	11342100	26082600	29860300	33597100	7.90094e+06	6.24045e+06	1.02497e+07	3.92924e+07	3.98314e+07	1.49206e+07	2.17723e+07	2.71925e+07	4.4197e+07	7.09249e+06	7.07311e+06	1.00739e+07	3.41259e+07	4.00642e+07	2.30472e+07	2.82833e+07	2.3966e+07	2.86077e+07	1	1	1	4.81156	5.6643	2.2878	3.98778	3.38833	2.83977
RNR1	P21524	Ribonucleoside-diphosphate reductase large chain 1 OS=Saccharomyces cerevisiae (strain ATCC 204508 / S288c) GN=RNR1 PE=1 SV=2	1	1	3	3	4	6.23952	3645750	2874330	1442120	15805200	14815900	7585370	7412050	18650900	15176700	3.51664e+06	2.25457e+06	1.90604e+06	1.52455e+07	1.16213e+07	1.00255e+07	7.14956e+06	1.46294e+07	2.0059e+07	3.15681e+06	2.5554e+06	1.87335e+06	1.32409e+07	1.16892e+07	1.5486e+07	9.28764e+06	1.28936e+07	1.29837e+07	1	1	1	4.19439	4.57433	8.26651	2.9421	5.04563	6.93074
PEA2	P40091	Protein PEA2 OS=Saccharomyces cerevisiae (strain ATCC 204508 / S288c) GN=PEA2 PE=1 SV=1	1	1	3	3	4	6.35709	21235900	14748400	2892960	2918430	3732450	5279750	2008370	3557020	4411110	2.086e+07	1.24567e+07	3.48691e+06	2.86678e+06	3.15247e+06	6.36372e+06	1.97282e+06	3.0043e+06	5.31675e+06	1.87256e+07	1.41188e+07	3.42709e+06	2.48983e+06	3.17089e+06	9.82978e+06	2.5628e+06	2.64783e+06	3.4414e+06	1	1	1	0.132964	0.224587	2.86826	0.136861	0.18754	1.00417
IRR1	P40541	Cohesin subunit SCC3 OS=Saccharomyces cerevisiae (strain ATCC 204508 / S288c) GN=IRR1 PE=1 SV=1	1	1	3	3	11	6.66578	2890070	2943190	2114710	43171800	33552800	10465200	18317500	35671200	27673100	2.61962e+06	2.3095e+06	2.97318e+06	3.91318e+07	2.63287e+07	1.47135e+07	1.66034e+07	2.7991e+07	3.8907e+07	2.35157e+06	2.61766e+06	2.92217e+06	3.39865e+07	2.64825e+07	2.27274e+07	2.15686e+07	2.46697e+07	2.51835e+07	1	1	1	14.4527	10.1169	7.77756	9.17199	9.42435	8.61808
RPN1	P38764	26S proteasome regulatory subunit RPN1 OS=Saccharomyces cerevisiae (strain ATCC 204508 / S288c) GN=RPN1 PE=1 SV=3	1	1	3	3	4	5.72456	1551710	1393730	863319	7543090	6242500	4013830	4279880	7649340	7168260	1.48139e+06	1.21036e+06	1.04131e+06	7.20124e+06	5.42117e+06	4.84135e+06	4.08592e+06	6.64292e+06	8.64611e+06	1.32981e+06	1.37185e+06	1.02344e+06	6.25436e+06	5.45285e+06	7.47822e+06	5.30781e+06	5.85471e+06	5.59642e+06	1	1	1	4.70321	3.9748	7.30692	3.99141	4.26773	5.46822
SEC8	P32855	Exocyst complex component SEC8 OS=Saccharomyces cerevisiae (strain ATCC 204508 / S288c) GN=SEC8 PE=1 SV=1	1	1	3	3	2	5.47118	1184090	822502	1466360	3928350	4712360	2056730	3293270	5528250	3989410	1.19653e+06	743182	1.60599e+06	3.96962e+06	4.25791e+06	2.25258e+06	3.32786e+06	4.99512e+06	4.3693e+06	1.0741e+06	842344	1.57845e+06	3.44766e+06	4.28279e+06	3.47947e+06	4.32306e+06	4.40243e+06	2.82814e+06	1	1	1	3.20982	5.08437	2.20437	4.02484	5.2264	1.79173
GUS1	P46655	Glutamate--tRNA ligase, cytoplasmic OS=Saccharomyces cerevisiae (strain ATCC 204508 / S288c) GN=GUS1 PE=1 SV=3	1	1	3	3	5	6.20945	1741550	1681940	937875	9816300	8383580	4746740	8580730	12911700	12254700	1.5982e+06	1.43626e+06	1.19682e+06	9.00829e+06	7.159e+06	6.05729e+06	7.87442e+06	1.10257e+07	1.56382e+07	1.43467e+06	1.6279e+06	1.17629e+06	7.82381e+06	7.20083e+06	9.35644e+06	1.02293e+07	9.71746e+06	1.01222e+07	1	1	1	5.4534	4.42339	7.95422	7.13007	5.96932	8.60521
POL30	P15873	Proliferating cell nuclear antigen OS=Saccharomyces cerevisiae (strain ATCC 204508 / S288c) GN=POL30 PE=1 SV=1	1	1	3	3	2	5.82849	702552	705126	414653	5895200	4589980	2272880	2516050	3181780	4021390	627047	631836	518473	5.26163e+06	4.1129e+06	2.84196e+06	2.24564e+06	2.85107e+06	5.02825e+06	562885	716141	509579	4.56979e+06	4.13694e+06	4.38985e+06	2.9172e+06	2.51278e+06	3.25467e+06	1	1	1	8.1185	5.7767	8.61467	5.18259	3.50877	6.38697
DST1	P07273	Transcription elongation factor S-II OS=Saccharomyces cerevisiae (strain ATCC 204508 / S288c) GN=DST1 PE=1 SV=4	1	1	3	3	7	6.8048	3486220	4007220	3780330	39414800	43843300	9329990	21891600	35408800	29152600	3.35442e+06	3.02634e+06	5.20228e+06	3.79247e+07	3.31114e+07	1.28394e+07	2.1064e+07	2.67415e+07	4.01182e+07	3.01118e+06	3.43014e+06	5.11304e+06	3.2938e+07	3.33048e+07	1.98325e+07	2.73631e+07	2.35685e+07	2.59675e+07	1	1	1	10.9386	9.70948	3.87881	9.08717	6.871	5.07868
SMC5	Q08204	Structural maintenance of chromosomes protein 5 OS=Saccharomyces cerevisiae (strain ATCC 204508 / S288c) GN=SMC5 PE=1 SV=1	1	1	3	3	4	5.72308	2214670	2157310	1736920	4987490	6488880	2887030	3589890	6443480	4391100	2.27291e+06	1.68349e+06	2.16875e+06	5.11865e+06	5.06368e+06	3.6048e+06	3.6843e+06	5.02825e+06	5.48281e+06	2.04034e+06	1.90811e+06	2.13155e+06	4.44561e+06	5.09327e+06	5.56818e+06	4.78609e+06	4.43163e+06	3.54889e+06	1	1	1	2.17886	2.66927	2.61227	2.34573	2.32252	1.66493
RPL8A	P17076	60S ribosomal protein L8-A OS=Saccharomyces cerevisiae (strain ATCC 204508 / S288c) GN=RPL8A PE=1 SV=4	1	1	3	3	2	6.81874	1112400	1047720	2250670	12222400	14363600	4317320	5064110	6173800	6246670	1.13407e+06	966590	2.39297e+06	1.24604e+07	1.32514e+07	4.59029e+06	5.16274e+06	5.69573e+06	6.64163e+06	1.01802e+06	1.09556e+06	2.35192e+06	1.0822e+07	1.33288e+07	7.09043e+06	6.70666e+06	5.01991e+06	4.29896e+06	1	1	1	10.6304	12.1662	3.01474	6.58791	4.58204	1.82785
SHS1	Q07657	Seventh homolog of septin 1 OS=Saccharomyces cerevisiae (strain ATCC 204508 / S288c) GN=SHS1 PE=1 SV=1	1	1	3	3	2	5.76927	1022180	903589	737981	4589800	5409660	1723400	3390400	8365850	6299850	1.05197e+06	678816	954530	4.72354e+06	4.06398e+06	2.22911e+06	3.48919e+06	6.2848e+06	8.14844e+06	944325	769390	938156	4.10246e+06	4.08772e+06	3.4432e+06	4.53264e+06	5.53908e+06	5.27429e+06	1	1	1	4.34432	5.31294	3.67018	4.79987	7.19931	5.62197
RIM1	P32445	Single-stranded DNA-binding protein RIM1, mitochondrial OS=Saccharomyces cerevisiae (strain ATCC 204508 / S288c) GN=RIM1 PE=1 SV=1	1	1	3	3	3	6.999	1399300	655759	1157500	9984850	12378600	2276800	12748800	31099300	17672400	1.25316e+06	522828	1.6211e+06	8.94206e+06	9.86929e+06	3.18871e+06	1.14174e+07	2.47951e+07	2.47506e+07	1.12493e+06	592588	1.59329e+06	7.76629e+06	9.92696e+06	4.92546e+06	1.48317e+07	2.1853e+07	1.60204e+07	1	1	1	6.90377	16.7519	3.09137	13.1845	36.8772	10.0549
ARO4	P32449	Phospho-2-dehydro-3-deoxyheptonate aldolase, tyrosine-inhibited OS=Saccharomyces cerevisiae (strain ATCC 204508 / S288c) GN=ARO4 PE=1 SV=2	1	1	3	3	2	5.99598	1402020	1143870	1028990	9230060	8330540	3145310	6826570	9727680	10136900	1.26264e+06	1.01376e+06	1.28923e+06	8.31244e+06	7.38297e+06	3.94077e+06	6.1479e+06	8.62119e+06	1.27006e+07	1.13344e+06	1.14902e+06	1.26711e+06	7.21945e+06	7.42611e+06	6.08715e+06	7.98643e+06	7.59825e+06	8.22076e+06	1	1	1	6.36951	6.46297	4.80396	7.04619	6.61279	6.4878
GCV2	P49095	Glycine dehydrogenase (decarboxylating), mitochondrial OS=Saccharomyces cerevisiae (strain ATCC 204508 / S288c) GN=GCV2 PE=1 SV=1	1	1	3	3	5	5.74985	2791910	1486560	1220700	10562600	8491040	3503870	5426240	7899630	10367900	2.29695e+06	1.43188e+06	1.5404e+06	8.69003e+06	8.17872e+06	4.42154e+06	4.46426e+06	7.60906e+06	1.30833e+07	2.06192e+06	1.62294e+06	1.51398e+06	7.5474e+06	8.22651e+06	6.82976e+06	5.7993e+06	6.70622e+06	8.46847e+06	1	1	1	3.66037	5.06891	4.51114	2.81257	4.13215	5.59352
REC8	Q12188	Meiotic recombination protein REC8 OS=Saccharomyces cerevisiae (strain ATCC 204508 / S288c) GN=REC8 PE=1 SV=1	1	1	3	3	8	6.52365	2697910	2544300	1874710	30829400	25554700	9634510	19686000	23963700	21185400	2.28288e+06	2.18881e+06	2.57536e+06	2.60867e+07	2.19842e+07	1.32353e+07	1.66576e+07	2.06155e+07	2.91032e+07	2.04928e+06	2.48087e+06	2.53119e+06	2.26567e+07	2.21127e+07	2.0444e+07	2.1639e+07	1.81694e+07	1.88378e+07	1	1	1	11.0559	8.9133	8.07686	10.5593	7.32382	7.44228
IST1	P53843	Vacuolar protein sorting-associated protein IST1 OS=Saccharomyces cerevisiae (strain ATCC 204508 / S288c) GN=IST1 PE=1 SV=1	1	1	3	3	3	5.76556	3740010	2143770	973722	5064100	7057830	2987910	3876540	6208880	5282240	3.23072e+06	1.70578e+06	1.41665e+06	4.37451e+06	5.61587e+06	4.34705e+06	3.34866e+06	4.94037e+06	7.68502e+06	2.90015e+06	1.93339e+06	1.39235e+06	3.79931e+06	5.64869e+06	6.7147e+06	4.35008e+06	4.35417e+06	4.97432e+06	1	1	1	1.31004	2.92165	4.82258	1.49995	2.2521	3.57262
MLS1	P30952	Malate synthase 1, glyoxysomal OS=Saccharomyces cerevisiae (strain ATCC 204508 / S288c) GN=MLS1 PE=1 SV=1	1	1	3	3	9	7.18432	22392400	15591900	13147000	114908000	85442300	48172800	60284200	82328500	91137500	1.93051e+07	1.50885e+07	1.57582e+07	9.90652e+07	8.2684e+07	5.77408e+07	5.19726e+07	7.96707e+07	1.09239e+08	1.73297e+07	1.71018e+07	1.54879e+07	8.60393e+07	8.31671e+07	8.91897e+07	6.7515e+07	7.02175e+07	7.07077e+07	1	1	1	4.96484	4.86306	5.75867	3.89591	4.10585	4.56535
TRM1	P15565|P15565-2	tRNA (guanine(26)-N(2))-dimethyltransferase, mitochondrial OS=Saccharomyces cerevisiae (strain ATCC 204508 / S288c) GN=TRM1 PE=1 SV=1|Isoform 2 of tRNA (guanine(26)-N(2))-dimethyltransferase, mitochondrial OS=Saccharomyces cerevisiae (strain ATCC 204508 / S288c) GN=TRM1	1	1	3	3	2	5.84309	826271	889297	575890	3073120	5351580	1314530	2363440	3522250	2981140	830796	634919	802225	3.08995e+06	3.82079e+06	1.83116e+06	2.37638e+06	2.51473e+06	4.15278e+06	745787	719635	788464	2.68366e+06	3.84312e+06	2.82852e+06	3.08704e+06	2.21635e+06	2.68799e+06	1	1	1	3.59843	5.34037	3.58738	4.13931	3.07982	3.40915
ATP1	P07251	ATP synthase subunit alpha, mitochondrial OS=Saccharomyces cerevisiae (strain ATCC 204508 / S288c) GN=ATP1 PE=1 SV=5	1	1	3	3	16	7.31594	10346700	7882370	7032400	67158100	51279800	36119300	48107700	62739100	66773400	9.3053e+06	7.77278e+06	7.92967e+06	6.03986e+07	5.05669e+07	4.07278e+07	4.32657e+07	6.18669e+07	7.52931e+07	8.35316e+06	8.8099e+06	7.79364e+06	5.24569e+07	5.08624e+07	6.29105e+07	5.62042e+07	5.45261e+07	4.87354e+07	1	1	1	6.27989	5.77332	8.07203	6.7285	6.18919	6.25322
TIF34	P40217	Eukaryotic translation initiation factor 3 subunit I OS=Saccharomyces cerevisiae (strain ATCC 204508 / S288c) GN=TIF34 PE=1 SV=1	1	1	3	3	2	6.04386	578251	2042160	571824	3582350	5011750	2007060	3070210	10079400	5095370	780759	1.08927e+06	793989	4.83692e+06	2.67323e+06	2.78684e+06	4.14542e+06	5.37628e+06	7.07502e+06	700870	1.23461e+06	780369	4.20092e+06	2.68885e+06	4.30472e+06	5.38511e+06	4.73836e+06	4.57949e+06	1	1	1	5.99387	2.17789	5.51626	7.68347	3.83793	5.86836
RPS20	P38701	40S ribosomal protein S20 OS=Saccharomyces cerevisiae (strain ATCC 204508 / S288c) GN=RPS20 PE=1 SV=3	1	1	3	3	6	7.24468	6911600	4799000	3806270	33811900	40116600	20007400	26421700	44942100	39775800	6.62967e+06	4.11362e+06	4.62927e+06	3.24327e+07	3.43873e+07	2.43335e+07	2.53439e+07	3.85236e+07	4.83762e+07	5.9513e+06	4.6625e+06	4.54986e+06	2.81682e+07	3.45882e+07	3.75869e+07	3.2923e+07	3.39526e+07	3.13128e+07	1	1	1	4.73311	7.41838	8.2611	5.53207	7.28207	6.88213
PWP1	P21304	Periodic tryptophan protein 1 OS=Saccharomyces cerevisiae (strain ATCC 204508 / S288c) GN=PWP1 PE=1 SV=1	1	1	3	3	2	5.53725	1868950	1630220	691728	7075640	6619230	3670300	3374160	4985170	5740660	1.68511e+06	1.38105e+06	905613	6.37964e+06	5.60751e+06	4.80517e+06	3.04226e+06	4.22321e+06	7.51569e+06	1.51268e+06	1.56532e+06	890078	5.54079e+06	5.64027e+06	7.42235e+06	3.95205e+06	3.72211e+06	4.86472e+06	1	1	1	3.66289	3.60327	8.33898	2.61261	2.37786	5.4655
DED81	P38707	Asparagine--tRNA ligase, cytoplasmic OS=Saccharomyces cerevisiae (strain ATCC 204508 / S288c) GN=DED81 PE=1 SV=1	1	1	3	3	7	6.39461	2171170	1645860	1382760	12548300	10836900	4363620	12049400	16863800	16859300	1.88772e+06	1.47333e+06	1.77662e+06	1.09101e+07	9.70092e+06	5.60654e+06	1.04763e+07	1.5096e+07	2.16614e+07	1.69456e+06	1.66992e+06	1.74614e+06	9.47556e+06	9.75761e+06	8.66018e+06	1.36093e+07	1.33048e+07	1.40209e+07	1	1	1	5.59174	5.84316	4.9596	8.03114	7.96736	8.02965
YHR020W	P38708	Putative proline--tRNA ligase YHR020W OS=Saccharomyces cerevisiae (strain ATCC 204508 / S288c) GN=YHR020W PE=1 SV=1	1	1	3	3	4	6.19176	2764460	2900180	1697300	6114090	6567230	4327220	6096520	12181900	10743300	2.93695e+06	2.35078e+06	1.97099e+06	6.49559e+06	5.32316e+06	5.02499e+06	6.47692e+06	9.87421e+06	1.24757e+07	2.63643e+06	2.66444e+06	1.93718e+06	5.6415e+06	5.35426e+06	7.76189e+06	8.41384e+06	8.70259e+06	8.0752e+06	1	1	1	2.13982	2.00952	4.0068	3.19137	3.26619	4.16853
SPT15	P13393	TATA-box-binding protein OS=Saccharomyces cerevisiae (strain ATCC 204508 / S288c) GN=SPT15 PE=1 SV=3	1	1	3	3	4	6.90122	2196180	1198280	1424410	10365400	10022600	2298580	13498400	18798400	17976900	1.76622e+06	1.06798e+06	1.98726e+06	8.33611e+06	8.93271e+06	3.20685e+06	1.08557e+07	1.67542e+07	2.50804e+07	1.5855e+06	1.21047e+06	1.95317e+06	7.24001e+06	8.98491e+06	4.95349e+06	1.41022e+07	1.47663e+07	1.62339e+07	1	1	1	4.5664	7.42263	2.53613	8.89447	12.1987	8.31158
CCT8	P47079	T-complex protein 1 subunit theta OS=Saccharomyces cerevisiae (strain ATCC 204508 / S288c) GN=CCT8 PE=1 SV=1	1	1	3	3	2	5.94489	1204950	805318	553578	6338060	5400610	2996550	4063280	6369700	6210030	1.05265e+06	730643	698438	5.53694e+06	4.89982e+06	3.78069e+06	3.54969e+06	5.77905e+06	7.83507e+06	944936	828132	686457	4.8089e+06	4.92845e+06	5.83987e+06	4.61122e+06	5.09334e+06	5.07145e+06	1	1	1	5.08912	5.95129	8.50726	4.87993	6.1504	7.38786
ARP7	Q12406	Actin-related protein 7 OS=Saccharomyces cerevisiae (strain ATCC 204508 / S288c) GN=ARP7 PE=1 SV=1	1	1	3	3	3	6.07565	6446040	4997430	4504640	15547900	19429100	7882660	8605070	14696300	13531300	6.38799e+06	4.18718e+06	5.42517e+06	1.54079e+07	1.6279e+07	9.4935e+06	8.52758e+06	1.23135e+07	1.62965e+07	5.73435e+06	4.74588e+06	5.33211e+06	1.33819e+07	1.63741e+07	1.46642e+07	1.10777e+07	1.08525e+07	1.05483e+07	1	1	1	2.33364	3.45018	2.75017	1.93182	2.28672	1.97826
LPX1	Q12405	Peroxisomal membrane protein LPX1 OS=Saccharomyces cerevisiae (strain ATCC 204508 / S288c) GN=LPX1 PE=1 SV=1	1	1	3	3	3	5.89417	1163030	1218710	851076	8723580	11779200	3159390	4806240	10684700	7032430	1.18899e+06	850336	1.19314e+06	8.91827e+06	8.21875e+06	4.42922e+06	4.9135e+06	7.45508e+06	9.85892e+06	1.06733e+06	963796	1.17268e+06	7.74563e+06	8.26678e+06	6.84163e+06	6.38289e+06	6.57051e+06	6.38144e+06	1	1	1	7.25704	8.57731	5.83421	5.98026	6.81732	5.44178
VTC4	P47075	Vacuolar transporter chaperone 4 OS=Saccharomyces cerevisiae (strain ATCC 204508 / S288c) GN=VTC4 PE=1 SV=2	1	1	3	3	3	5.68955	999241	612146	474810	5632290	3714470	1720950	2205440	4489920	3412840	828308	541581	647426	4.66881e+06	3.28628e+06	2.3466e+06	1.82817e+06	3.97234e+06	4.65357e+06	743553	613843	636320	4.05492e+06	3.30549e+06	3.62469e+06	2.37489e+06	3.50101e+06	3.01214e+06	1	1	1	5.45344	5.3849	5.69633	3.19397	5.70342	4.73369
VPS33	P20795	Vacuolar protein sorting-associated protein 33 OS=Saccharomyces cerevisiae (strain ATCC 204508 / S288c) GN=VPS33 PE=1 SV=1	1	1	3	3	2	5.59498	613079	756130	524147	3084260	4886050	2115110	2535980	4920310	3722630	699163	553028	628407	3.51733e+06	3.57362e+06	2.53583e+06	2.89206e+06	3.59868e+06	4.46311e+06	627622	626818	617627	3.05484e+06	3.5945e+06	3.91699e+06	3.75693e+06	3.17168e+06	2.88886e+06	1	1	1	4.86732	5.73452	6.34201	5.98598	5.05997	4.67736
BDP1	P46678	Transcription factor TFIIIB component B'' OS=Saccharomyces cerevisiae (strain ATCC 204508 / S288c) GN=BDP1 PE=1 SV=1	1	1	3	3	12	7.40508	2374730	4087270	3502240	46171200	39343000	7553790	75823700	83720200	88337700	2.17589e+06	3.18916e+06	4.89869e+06	4.23052e+07	3.0698e+07	1.05657e+07	6.94749e+07	6.5324e+07	1.23561e+08	1.95325e+06	3.61469e+06	4.81466e+06	3.67426e+07	3.08774e+07	1.63204e+07	9.02514e+07	5.75731e+07	7.99778e+07	1	1	1	18.811	8.54221	3.38974	46.2058	15.9275	16.6113
TAF1	P46677	Transcription initiation factor TFIID subunit 1 OS=Saccharomyces cerevisiae (strain ATCC 204508 / S288c) GN=TAF1 PE=1 SV=1	1	1	3	3	7	6.14189	4858370	3960760	3015190	16110500	19860700	5525980	11028200	21769700	15724900	4.59215e+06	2.97941e+06	4.2407e+06	1.52277e+07	1.49398e+07	7.77199e+06	1.04239e+07	1.63759e+07	2.21162e+07	4.12227e+06	3.37695e+06	4.16796e+06	1.32254e+07	1.50271e+07	1.20051e+07	1.35412e+07	1.44328e+07	1.43153e+07	1	1	1	3.20829	4.44992	2.88032	3.28488	4.27392	3.43461
RPL29	P05747	60S ribosomal protein L29 OS=Saccharomyces cerevisiae (strain ATCC 204508 / S288c) GN=RPL29 PE=1 SV=3	1	1	3	3	2	6.08376	4452410	3257410	3780420	75872200	54985700	14357600	48777800	61969400	67433300	3.60519e+06	3.00888e+06	5.05445e+06	6.1435e+07	5.07905e+07	1.91962e+07	3.94962e+07	5.72414e+07	9.01589e+07	3.23629e+06	3.41036e+06	4.96775e+06	5.3357e+07	5.10873e+07	2.96516e+07	5.13075e+07	5.04495e+07	5.83576e+07	1	1	1	16.4871	14.98	5.96882	15.8538	14.793	11.7473
RPL15A	P05748	60S ribosomal protein L15-A OS=Saccharomyces cerevisiae (strain ATCC 204508 / S288c) GN=RPL15A PE=1 SV=3	1	1	3	3	7	8.06572	5798590	5282060	4092640	202503000	183340000	26690100	70393900	87261900	110245000	4.69284e+06	4.24344e+06	6.29471e+06	1.63887e+08	1.4729e+08	4.10509e+07	5.69703e+07	7.01034e+07	1.69563e+08	4.21265e+06	4.80964e+06	6.18673e+06	1.42338e+08	1.4815e+08	6.34095e+07	7.40072e+07	6.17854e+07	1.09754e+08	1	1	1	33.7882	30.8028	10.2493	17.5678	12.8462	17.7402
RPL22A	P05749	60S ribosomal protein L22-A OS=Saccharomyces cerevisiae (strain ATCC 204508 / S288c) GN=RPL22A PE=1 SV=3	1	1	3	3	2	6.49231	932799	687013	494572	2111940	2913360	908637	1481590	3276700	2879210	932392	524295	648348	2.11102e+06	2.22334e+06	1.19116e+06	1.48094e+06	2.50062e+06	3.77443e+06	836987	594252	637226	1.83344e+06	2.23633e+06	1.83993e+06	1.92382e+06	2.20391e+06	2.4431e+06	1	1	1	2.19053	3.76327	2.88741	2.29851	3.70872	3.83396
XRN1	P22147	5'-3' exoribonuclease 1 OS=Saccharomyces cerevisiae (strain ATCC 204508 / S288c) GN=XRN1 PE=1 SV=1	1	1	3	3	7	5.99753	6057480	2860760	2275220	13277800	15318200	7124630	9845300	19006100	15621000	5.36676e+06	2.49224e+06	2.94778e+06	1.17638e+07	1.33449e+07	9.23067e+06	8.72267e+06	1.65578e+07	2.02386e+07	4.81762e+06	2.82478e+06	2.89721e+06	1.0217e+07	1.34229e+07	1.42582e+07	1.13312e+07	1.45931e+07	1.30999e+07	1	1	1	2.12075	4.75184	4.92137	2.35203	5.16611	4.52157
GAS1	P22146	1,3-beta-glucanosyltransferase GAS1 OS=Saccharomyces cerevisiae (strain ATCC 204508 / S288c) GN=GAS1 PE=1 SV=2	1	1	3	3	3	6.13597	3809870	2309490	1471640	14877600	9896830	7684180	7354520	11111800	11143600	3.15696e+06	2.2574e+06	1.81698e+06	1.2328e+07	9.6736e+06	9.48739e+06	6.09415e+06	1.08612e+07	1.37586e+07	2.83393e+06	2.5586e+06	1.78582e+06	1.0707e+07	9.73013e+06	1.46548e+07	7.9166e+06	9.57245e+06	8.90562e+06	1	1	1	3.77814	3.80291	8.20621	2.79351	3.74128	4.98686
CAD1	P24813	AP-1-like transcription activator YAP2 OS=Saccharomyces cerevisiae (strain ATCC 204508 / S288c) GN=CAD1 PE=1 SV=2	1	1	3	3	3	5.69242	892016	680774	725586	6518850	7489060	1818550	7503740	12916800	11716900	832088	553620	956497	6.0809e+06	6.09026e+06	2.39729e+06	6.99962e+06	1.05042e+07	1.54457e+07	746946	627489	940089	5.28133e+06	6.12585e+06	3.70299e+06	9.09285e+06	9.25785e+06	9.99762e+06	1	1	1	7.07056	9.76248	3.93897	12.1734	14.7538	10.6348
SRM1	P21827	Guanine nucleotide exchange factor SRM1 OS=Saccharomyces cerevisiae (strain ATCC 204508 / S288c) GN=SRM1 PE=1 SV=1	1	1	3	3	4	6.32175	517994	1168120	784572	6484640	7398460	2051060	7247390	17402000	12532600	621031	763245	1.00154e+06	7.77453e+06	4.83412e+06	2.61826e+06	8.68901e+06	1.13704e+07	1.59984e+07	557485	865084	984359	6.75228e+06	4.86237e+06	4.04432e+06	1.12875e+07	1.00213e+07	1.03554e+07	1	1	1	12.112	5.62069	4.10859	20.2471	11.5841	10.5199
NOP1	P15646	rRNA 2'-O-methyltransferase fibrillarin OS=Saccharomyces cerevisiae (strain ATCC 204508 / S288c) GN=NOP1 PE=1 SV=1	1	1	3	3	6	6.68986	5068200	3699870	4804040	25404000	23807900	6477010	21789800	36375300	28755400	4.53023e+06	3.16386e+06	6.28505e+06	2.27075e+07	2.03588e+07	8.47378e+06	1.94769e+07	3.11055e+07	3.76203e+07	4.06668e+06	3.58602e+06	6.17724e+06	1.97217e+07	2.04778e+07	1.30891e+07	2.53014e+07	2.74148e+07	2.43507e+07	1	1	1	4.84958	5.71045	2.11892	6.22165	7.64491	3.942
TCP1	P12612	T-complex protein 1 subunit alpha OS=Saccharomyces cerevisiae (strain ATCC 204508 / S288c) GN=TCP1 PE=1 SV=2	1	1	3	3	4	5.88602	1997120	1626470	1254150	7728240	7817130	6150740	6137690	9208210	7762300	1.94307e+06	1.47459e+06	1.42181e+06	7.51908e+06	7.08715e+06	6.97299e+06	5.97158e+06	8.34833e+06	8.79999e+06	1.74425e+06	1.67134e+06	1.39742e+06	6.53041e+06	7.12857e+06	1.07709e+07	7.75738e+06	7.35777e+06	5.69601e+06	1	1	1	3.74397	4.26518	7.7077	4.4474	4.40232	4.0761
HSP60	P19882	Heat shock protein 60, mitochondrial OS=Saccharomyces cerevisiae (strain ATCC 204508 / S288c) GN=HSP60 PE=1 SV=1	1	1	3	3	12	6.4109	6028620	5484600	4829150	17266000	18154200	12748900	11653500	29349800	17978200	6.58002e+06	4.46547e+06	5.43424e+06	1.88452e+07	1.47809e+07	1.43463e+07	1.27194e+07	2.38961e+07	2.02309e+07	5.90673e+06	5.0613e+06	5.34102e+06	1.63673e+07	1.48672e+07	2.21602e+07	1.65231e+07	2.10608e+07	1.30949e+07	1	1	1	2.77096	2.93743	4.14905	2.79733	4.16114	2.45177
PCS60	P38137	Peroxisomal-coenzyme A synthetase OS=Saccharomyces cerevisiae (strain ATCC 204508 / S288c) GN=PCS60 PE=1 SV=1	1	1	3	3	8	7.11416	10998400	7450590	8583460	39973000	49476900	39354000	27506600	58705200	40010900	1.18789e+07	6.62816e+06	8.9333e+06	4.31733e+07	4.40154e+07	4.09579e+07	2.97088e+07	5.22251e+07	4.16416e+07	1.06634e+07	7.51256e+06	8.78005e+06	3.74965e+07	4.42726e+07	6.3266e+07	3.85932e+07	4.60284e+07	2.69536e+07	1	1	1	3.51636	5.89315	7.20565	3.61921	6.12686	3.06987
RPS12	P48589	40S ribosomal protein S12 OS=Saccharomyces cerevisiae (strain ATCC 204508 / S288c) GN=RPS12 PE=1 SV=1	1	1	3	3	2	6.94291	1745550	2138380	735076	4530020	4667750	2349780	3264950	6072070	5417290	1.7145e+06	1.58034e+06	1.01265e+06	4.44945e+06	3.44964e+06	3.2371e+06	3.20688e+06	4.48748e+06	7.46295e+06	1.53907e+06	1.7912e+06	995282	3.8644e+06	3.46979e+06	5.00021e+06	4.16589e+06	3.95502e+06	4.83058e+06	1	1	1	2.51087	1.93713	5.02391	2.70676	2.20802	4.85348
SEG1	Q04279	Eisosome protein SEG1 OS=Saccharomyces cerevisiae (strain ATCC 204508 / S288c) GN=SEG1 PE=1 SV=1	1	1	3	3	2	6.12817	1382440	883060	951012	7052870	7427810	2550220	4124600	7606250	6084580	1.26669e+06	753020	1.21715e+06	6.46236e+06	6.33398e+06	3.2639e+06	3.77926e+06	6.48615e+06	7.78734e+06	1.13708e+06	853495	1.19627e+06	5.61264e+06	6.371e+06	5.0416e+06	4.90945e+06	5.71654e+06	5.04055e+06	1	1	1	4.936	7.4646	4.21443	4.31759	6.6978	4.21355
HMO1	Q03973	High mobility group protein 1 OS=Saccharomyces cerevisiae (strain ATCC 204508 / S288c) GN=HMO1 PE=1 SV=1	1	1	3	3	4	6.89528	3521650	2214260	1623530	29001500	27812800	5331780	26718500	47239300	34512400	2.77392e+06	1.7073e+06	2.6732e+06	2.28438e+07	2.1445e+07	8.77897e+06	2.10455e+07	3.64238e+07	5.68259e+07	2.49008e+06	1.9351e+06	2.62734e+06	1.98401e+07	2.15703e+07	1.35605e+07	2.73392e+07	3.21019e+07	3.6782e+07	1	1	1	7.96765	11.1468	5.1613	10.9792	16.5893	13.9997
RSM24	Q03976	37S ribosomal protein S24, mitochondrial OS=Saccharomyces cerevisiae (strain ATCC 204508 / S288c) GN=RSM24 PE=1 SV=1	1	1	3	3	2	5.88403	446076	254088	474691	10798600	10479200	3453130	3552490	5421890	4837970	401874	242260	552628	9.72856e+06	9.99137e+06	4.02008e+06	3.20047e+06	5.16949e+06	5.63229e+06	360753	274584	543148	8.44938e+06	1.00497e+07	6.20965e+06	4.15757e+06	4.55611e+06	3.64564e+06	1	1	1	23.4215	36.5999	11.4327	11.5247	16.5928	6.71206
IDP3	P53982	Isocitrate dehydrogenase [NADP] OS=Saccharomyces cerevisiae (strain ATCC 204508 / S288c) GN=IDP3 PE=3 SV=1	1	1	3	3	2	5.58867	558487	650907	544637	2082760	2537770	2011980	1324580	2427340	2486550	661723	560693	533627	2.46776e+06	2.18604e+06	1.97131e+06	1.56943e+06	2.09092e+06	2.43628e+06	594014	635506	524473	2.14328e+06	2.19882e+06	3.045e+06	2.03877e+06	1.84282e+06	1.57695e+06	1	1	1	3.60813	3.45995	5.80582	3.43219	2.89977	3.00673
YHM2	Q04013	Citrate/oxoglutarate carrier protein OS=Saccharomyces cerevisiae (strain ATCC 204508 / S288c) GN=YHM2 PE=1 SV=1	1	1	3	3	2	6.48924	926982	727220	546324	9741720	8196580	3772990	4615350	7211000	7029330	827130	642255	693277	8.69236e+06	7.23893e+06	4.78786e+06	4.1182e+06	6.3685e+06	8.92011e+06	742495	727950	681384	7.54942e+06	7.28123e+06	7.39561e+06	5.34974e+06	5.61285e+06	5.77377e+06	1	1	1	10.1676	10.0024	10.8538	7.20509	7.71048	8.47359
PFK2	P16862	ATP-dependent 6-phosphofructokinase subunit beta OS=Saccharomyces cerevisiae (strain ATCC 204508 / S288c) GN=PFK2 PE=1 SV=4	1	1	3	3	8	6.32436	2724720	4269490	3447960	25181900	24430200	13463400	13307300	18102600	25421800	3.03922e+06	3.73797e+06	3.53071e+06	2.80885e+07	2.13888e+07	1.37865e+07	1.48433e+07	1.58489e+07	2.60319e+07	2.72824e+06	4.23672e+06	3.47014e+06	2.43952e+07	2.15138e+07	2.12955e+07	1.92822e+07	1.39684e+07	1.68498e+07	1	1	1	8.94175	5.07793	6.13676	7.06763	3.29698	4.85565
PFK1	P16861	ATP-dependent 6-phosphofructokinase subunit alpha OS=Saccharomyces cerevisiae (strain ATCC 204508 / S288c) GN=PFK1 PE=1 SV=1	1	1	3	3	5	6.39142	3011800	2158360	1897810	19023300	13554000	11200100	12126700	13517500	17983800	2.64726e+06	2.2892e+06	2.03574e+06	1.67208e+07	1.43756e+07	1.20141e+07	1.06589e+07	1.43369e+07	1.92909e+07	2.37638e+06	2.59464e+06	2.00082e+06	1.45222e+07	1.44596e+07	1.85577e+07	1.38465e+07	1.26358e+07	1.24865e+07	1	1	1	6.11105	5.57288	9.27504	5.8267	4.86995	6.24069
LOC1	P43586	60S ribosomal subunit assembly/export protein LOC1 OS=Saccharomyces cerevisiae (strain ATCC 204508 / S288c) GN=LOC1 PE=1 SV=1	1	1	3	3	3	6.71108	838245	1389780	494446	11425000	10150300	1878220	9299600	13579200	13686600	735156	944247	829795	1.00199e+07	6.89633e+06	3.15209e+06	8.15592e+06	9.226e+06	2.29693e+07	659933	1.07024e+06	815561	8.70243e+06	6.93663e+06	4.8689e+06	1.05949e+07	8.1313e+06	1.48675e+07	1	1	1	13.1868	6.4814	5.97	16.0546	7.59766	18.2297
YER079W	P40052	Uncharacterized protein YER079W OS=Saccharomyces cerevisiae (strain ATCC 204508 / S288c) GN=YER079W PE=1 SV=1	1	1	3	3	2	5.5752	660911	691035	453428	2490710	3432860	1347850	1742440	3178630	2692470	691784	524087	571185	2.60706e+06	2.60351e+06	1.69789e+06	1.82383e+06	2.4107e+06	3.39172e+06	620999	594016	561387	2.26426e+06	2.61873e+06	2.62266e+06	2.36925e+06	2.12466e+06	2.19538e+06	1	1	1	3.64616	4.40851	4.67176	3.81523	3.57678	3.91063
DMC1	P25453	Meiotic recombination protein DMC1 OS=Saccharomyces cerevisiae (strain ATCC 204508 / S288c) GN=DMC1 PE=1 SV=1	1	1	3	3	2	6.41601	1986630	1660500	5011370	12698800	10580500	4548550	4482120	10287200	12373600	2.31662e+06	1.65609e+06	4.30897e+06	1.48081e+07	1.05524e+07	3.91102e+06	5.22663e+06	1.02599e+07	1.06393e+07	2.07958e+06	1.87706e+06	4.23506e+06	1.28611e+07	1.06141e+07	6.04119e+06	6.78965e+06	9.0425e+06	6.88656e+06	1	1	1	6.18446	5.65462	1.42647	3.26492	4.81737	1.62609
GND1	P38720	6-phosphogluconate dehydrogenase, decarboxylating 1 OS=Saccharomyces cerevisiae (strain ATCC 204508 / S288c) GN=GND1 PE=1 SV=1	1	1	3	3	2	5.47185	796769	609248	421391	2073870	1951140	1607860	990475	2071970	1827570	808341	539370	469170	2.10399e+06	1.72735e+06	1.79017e+06	1.00486e+06	1.83432e+06	2.03479e+06	725629	611338	461122	1.82734e+06	1.73745e+06	2.7652e+06	1.30536e+06	1.61667e+06	1.31707e+06	1	1	1	2.51828	2.84204	5.99667	1.79894	2.64449	2.85623
TIM44	Q01852	Mitochondrial import inner membrane translocase subunit TIM44 OS=Saccharomyces cerevisiae (strain ATCC 204508 / S288c) GN=TIM44 PE=1 SV=1	1	1	3	3	8	6.15308	18190300	8124310	2543610	18379900	16522200	12369000	14779400	21799500	19064900	1.35769e+07	7.22093e+06	3.83428e+06	1.37184e+07	1.4685e+07	1.86452e+07	1.10311e+07	1.93755e+07	2.87388e+07	1.21877e+07	8.18441e+06	3.76851e+06	1.19146e+07	1.47708e+07	2.88005e+07	1.43299e+07	1.70765e+07	1.86019e+07	1	1	1	0.977595	1.80475	7.64242	1.17577	2.08647	4.93614
RPS15	Q01855	40S ribosomal protein S15 OS=Saccharomyces cerevisiae (strain ATCC 204508 / S288c) GN=RPS15 PE=1 SV=1	1	1	3	3	3	6.7978	2009570	2913010	2085290	31975600	42767700	15028000	21176000	27495400	24988700	2.09407e+06	2.23141e+06	2.6124e+06	3.33202e+07	3.27607e+07	1.88267e+07	2.20665e+07	2.10619e+07	3.13052e+07	1.8798e+06	2.52915e+06	2.56759e+06	2.8939e+07	3.29522e+07	2.90808e+07	2.86654e+07	1.85628e+07	2.02631e+07	1	1	1	15.3947	13.029	11.3261	15.2492	7.33956	7.89189
ATP5	P09457	ATP synthase subunit 5, mitochondrial OS=Saccharomyces cerevisiae (strain ATCC 204508 / S288c) GN=ATP5 PE=1 SV=1	1	1	3	3	2	6.02957	7072330	2670010	1760650	4483740	4858170	7512620	2781650	3462820	3948070	6.19016e+06	2.9265e+06	1.83526e+06	3.92446e+06	5.32487e+06	7.83098e+06	2.43468e+06	3.79547e+06	4.11538e+06	5.55676e+06	3.31698e+06	1.80378e+06	3.40844e+06	5.35598e+06	1.20962e+07	3.16277e+06	3.34512e+06	2.66378e+06	1	1	1	0.613386	1.61471	6.70603	0.569175	1.00848	1.47678
PDH1	Q12428	Probable 2-methylcitrate dehydratase OS=Saccharomyces cerevisiae (strain ATCC 204508 / S288c) GN=PDH1 PE=1 SV=1	1	1	3	3	8	7.23103	3183750	2828230	2500420	21306600	24008800	8176500	16336600	40793300	26052800	3.24932e+06	2.12691e+06	3.25781e+06	2.17454e+07	1.80553e+07	1.06532e+07	1.6673e+07	3.06777e+07	3.39444e+07	2.91684e+06	2.4107e+06	3.20193e+06	1.88861e+07	1.81608e+07	1.64556e+07	2.16591e+07	2.70376e+07	2.19714e+07	1	1	1	6.47487	7.53341	5.13927	7.42555	11.2157	6.86191
ACS2	P52910	Acetyl-coenzyme A synthetase 2 OS=Saccharomyces cerevisiae (strain ATCC 204508 / S288c) GN=ACS2 PE=1 SV=1	1	1	3	3	4	6.64322	9217220	3495560	2188940	14645600	12141700	6778330	8249780	12884500	11642000	6.92388e+06	3.32835e+06	3.06036e+06	1.10016e+07	1.15609e+07	9.47679e+06	6.19715e+06	1.22682e+07	1.62767e+07	6.21541e+06	3.77245e+06	3.00786e+06	9.55505e+06	1.16284e+07	1.46384e+07	8.05041e+06	1.08125e+07	1.05355e+07	1	1	1	1.53732	3.08247	4.86671	1.29523	2.86618	3.50266
SPF1	P39986	Manganese-transporting ATPase 1 OS=Saccharomyces cerevisiae (strain ATCC 204508 / S288c) GN=SPF1 PE=1 SV=1	1	1	3	3	2	5.99997	1012890	738964	702400	3649020	3376780	1595590	3355220	6341430	4393840	939196	631731	886097	3.38353e+06	2.88677e+06	2.01288e+06	3.11111e+06	5.42121e+06	5.54295e+06	843094	716023	870897	2.93864e+06	2.90364e+06	3.10921e+06	4.04148e+06	4.77796e+06	3.58782e+06	1	1	1	3.48554	4.05523	3.57013	4.79363	6.67292	4.11968
TRI1	Q05024	Protein TRI1 OS=Saccharomyces cerevisiae (strain ATCC 204508 / S288c) GN=TRI1 PE=1 SV=1	1	1	3	3	3	6.34533	806450	1067350	597653	9986580	10957900	2194380	16133300	19678400	17925600	710672	777373	931183	8.80052e+06	7.98087e+06	3.41899e+06	1.42172e+07	1.43322e+07	2.79293e+07	637954	881098	915209	7.64336e+06	8.0275e+06	5.28117e+06	1.84689e+07	1.26316e+07	1.80779e+07	1	1	1	11.9811	9.1108	5.77045	28.9502	14.3362	19.7528
RRP5	Q05022	rRNA biogenesis protein RRP5 OS=Saccharomyces cerevisiae (strain ATCC 204508 / S288c) GN=RRP5 PE=1 SV=1	1	1	3	3	6	6.09207	2447080	3489070	2401360	10772400	11241800	5677970	8615800	13794600	12977100	2.62113e+06	2.79824e+06	2.79538e+06	1.15386e+07	9.01594e+06	6.60963e+06	9.22862e+06	1.10633e+07	1.51064e+07	2.35293e+06	3.17161e+06	2.74743e+06	1.00214e+07	9.06862e+06	1.02096e+07	1.19884e+07	9.75058e+06	9.77801e+06	1	1	1	4.25912	2.85932	3.71606	5.09511	3.07434	3.55897
FUM1	P08417	Fumarate hydratase, mitochondrial OS=Saccharomyces cerevisiae (strain ATCC 204508 / S288c) GN=FUM1 PE=1 SV=2	1	1	3	3	5	6.08979	1887850	1369430	1581520	10008500	8683570	6013710	6860880	9633670	9819930	1.79548e+06	1.35722e+06	1.67785e+06	9.51881e+06	8.60612e+06	6.37999e+06	6.52519e+06	9.54775e+06	1.0418e+07	1.61176e+06	1.53831e+06	1.64906e+06	8.2672e+06	8.65641e+06	9.8549e+06	8.47655e+06	8.41487e+06	6.74334e+06	1	1	1	5.12929	5.62723	5.97606	5.25918	5.47021	4.08919
RPL12A|RPL12B	P0CX53|P0CX54	60S ribosomal protein L12-A OS=Saccharomyces cerevisiae (strain ATCC 204508 / S288c) GN=RPL12A PE=1 SV=1|60S ribosomal protein L12-B OS=Saccharomyces cerevisiae (strain ATCC 204508 / S288c) GN=RPL12B PE=1 SV=1	1	1	3	3	4	6.49969	10618900	6420360	6827680	27735100	31003300	31599500	8303430	9837980	10946200	1.03199e+07	6.71922e+06	6.71303e+06	2.69541e+07	3.24465e+07	3.10689e+07	8.06961e+06	1.02959e+07	1.07624e+07	9.26392e+06	7.61576e+06	6.59787e+06	2.341e+07	3.26361e+07	4.79908e+07	1.04828e+07	9.07428e+06	6.96623e+06	1	1	1	2.527	4.28533	7.27368	1.13158	1.19151	1.05583
RPS18A|RPS18B	P0CX55|P0CX56	40S ribosomal protein S18-A OS=Saccharomyces cerevisiae (strain ATCC 204508 / S288c) GN=RPS18A PE=1 SV=1|40S ribosomal protein S18-B OS=Saccharomyces cerevisiae (strain ATCC 204508 / S288c) GN=RPS18B PE=1 SV=1	1	1	3	3	4	7.17463	3608160	3009120	2229920	62683300	46334700	33432300	29967400	44384900	37950100	3.24145e+06	2.78651e+06	2.68049e+06	5.63125e+07	4.2907e+07	4.01876e+07	2.69217e+07	4.11014e+07	4.56182e+07	2.90977e+06	3.15831e+06	2.63451e+06	4.89081e+07	4.31577e+07	6.20761e+07	3.49726e+07	3.62246e+07	2.95276e+07	1	1	1	16.8082	13.6648	23.5626	12.019	11.4696	11.208
RPL18A|RPL18B	P0CX49|P0CX50	60S ribosomal protein L18-A OS=Saccharomyces cerevisiae (strain ATCC 204508 / S288c) GN=RPL18A PE=1 SV=1|60S ribosomal protein L18-B OS=Saccharomyces cerevisiae (strain ATCC 204508 / S288c) GN=RPL18B PE=1 SV=1	1	1	3	3	10	8.41736	12725500	15555600	13918900	298176000	269294000	33845700	168786000	208086000	252042000	1.09201e+07	1.20452e+07	2.09471e+07	2.55873e+08	2.08523e+08	5.09358e+07	1.4484e+08	1.61128e+08	3.79309e+08	9.80273e+06	1.36524e+07	2.05878e+07	2.22229e+08	2.09742e+08	7.86784e+07	1.88154e+08	1.42009e+08	2.45517e+08	1	1	1	22.6701	15.363	3.8216	19.1941	10.4018	11.9254
RPL5	P26321	60S ribosomal protein L5 OS=Saccharomyces cerevisiae (strain ATCC 204508 / S288c) GN=RPL5 PE=1 SV=4	1	1	3	3	6	7.47032	5014460	3800810	3852140	20410800	21417300	9341640	13583500	24480100	21511800	4.89038e+06	3.28757e+06	4.56652e+06	1.99057e+07	1.85252e+07	1.1074e+07	1.32474e+07	2.11744e+07	2.55011e+07	4.38998e+06	3.72623e+06	4.48818e+06	1.72884e+07	1.86335e+07	1.71056e+07	1.7209e+07	1.8662e+07	1.65063e+07	1	1	1	3.93814	5.00063	3.81125	3.92007	5.00828	3.67772
SDH2	P21801	Succinate dehydrogenase [ubiquinone] iron-sulfur subunit, mitochondrial OS=Saccharomyces cerevisiae (strain ATCC 204508 / S288c) GN=SDH2 PE=1 SV=1	1	1	3	3	5	6.37807	3272440	1843180	1504290	16625600	9605310	6877600	6639950	11496300	11042900	2.70168e+06	1.84242e+06	1.82284e+06	1.37259e+07	9.60136e+06	8.334e+06	5.48185e+06	1.14916e+07	1.33813e+07	2.42524e+06	2.08825e+06	1.79157e+06	1.19211e+07	9.65746e+06	1.28732e+07	7.1212e+06	1.0128e+07	8.66141e+06	1	1	1	4.91543	4.62466	7.18542	2.93629	4.85001	4.83454
MST1	P07236	Threonine--tRNA ligase, mitochondrial OS=Saccharomyces cerevisiae (strain ATCC 204508 / S288c) GN=MST1 PE=1 SV=2	1	1	3	3	3	5.8967	746534	635172	659348	4113710	8248430	2548340	4836210	9740950	7634450	842447	474999	781305	4.64223e+06	6.1684e+06	3.0197e+06	5.45756e+06	7.28455e+06	9.04656e+06	756245	538378	767902	4.03183e+06	6.20444e+06	4.6644e+06	7.08964e+06	6.42021e+06	5.85562e+06	1	1	1	5.33138	11.5243	6.07421	9.37479	11.9251	7.62547
NAT1	P12945	N-terminal acetyltransferase A complex subunit NAT1 OS=Saccharomyces cerevisiae (strain ATCC 204508 / S288c) GN=NAT1 PE=1 SV=2	1	1	3	3	10	6.3812	3544680	4180560	2501050	25342000	28136900	12176100	19051000	37668400	30888000	3.68641e+06	3.16624e+06	3.17532e+06	2.63553e+07	2.13101e+07	1.54587e+07	1.98127e+07	2.8529e+07	3.92152e+07	3.3092e+06	3.58871e+06	3.12085e+06	2.28899e+07	2.14346e+07	2.38784e+07	2.57377e+07	2.51439e+07	2.5383e+07	1	1	1	6.91703	5.9728	7.65126	7.77762	7.0064	8.13338
PDA1	P16387	Pyruvate dehydrogenase E1 component subunit alpha, mitochondrial OS=Saccharomyces cerevisiae (strain ATCC 204508 / S288c) GN=PDA1 PE=1 SV=2	1	1	3	3	3	6.27457	1857810	1054250	719374	9044140	8224160	4413480	5691600	9762840	8781290	1.59821e+06	944584	933306	7.78038e+06	7.36866e+06	5.72599e+06	4.8963e+06	8.74729e+06	1.13927e+07	1.43468e+06	1.07062e+06	917297	6.75735e+06	7.41172e+06	8.8447e+06	6.36053e+06	7.70939e+06	7.37424e+06	1	1	1	4.71001	6.92283	9.64214	4.43342	7.20086	8.0391
FAA4	P47912	Long-chain-fatty-acid--CoA ligase 4 OS=Saccharomyces cerevisiae (strain ATCC 204508 / S288c) GN=FAA4 PE=1 SV=1	1	1	3	3	3	5.87835	1434670	809486	764974	4187980	4067600	1696280	1736300	7731330	4008850	1.46629e+06	614520	985945	4.28027e+06	3.08791e+06	2.18627e+06	1.77456e+06	5.86923e+06	5.16685e+06	1.31625e+06	696515	969032	3.71747e+06	3.10596e+06	3.37704e+06	2.30525e+06	5.17282e+06	3.34438e+06	1	1	1	2.82428	4.45928	3.48496	1.75137	7.42672	3.45125
RPT1	P33299	26S protease regulatory subunit 7 homolog OS=Saccharomyces cerevisiae (strain ATCC 204508 / S288c) GN=RPT1 PE=1 SV=1	1	1	3	3	4	5.85572	2055560	1638040	1193590	6120810	5602130	3857690	3093980	6213120	5508220	2.0449e+06	1.4349e+06	1.36967e+06	6.08905e+06	4.90739e+06	4.42679e+06	3.07793e+06	5.44261e+06	6.32082e+06	1.83566e+06	1.62636e+06	1.34618e+06	5.28842e+06	4.93606e+06	6.83788e+06	3.99838e+06	4.79682e+06	4.09131e+06	1	1	1	2.88094	3.03504	5.07948	2.17818	2.94942	3.0392
RPT3	P33298	26S protease regulatory subunit 6B homolog OS=Saccharomyces cerevisiae (strain ATCC 204508 / S288c) GN=RPT3 PE=1 SV=2	1	1	3	3	4	6.19944	2174600	1457410	1432760	11160300	9271820	5998370	6134110	17770200	11140800	2.18349e+06	1.24779e+06	1.66663e+06	1.12059e+07	7.93828e+06	6.9775e+06	6.15919e+06	1.52144e+07	1.29593e+07	1.96007e+06	1.41429e+06	1.63804e+06	9.73249e+06	7.98466e+06	1.07779e+07	8.0011e+06	1.34091e+07	8.38827e+06	1	1	1	4.96538	5.64572	6.57971	4.08205	9.48118	5.1209
ARL1	P38116	ADP-ribosylation factor-like protein 1 OS=Saccharomyces cerevisiae (strain ATCC 204508 / S288c) GN=ARL1 PE=1 SV=4	1	1	3	3	2	5.64165	1181820	812054	412217	3182180	3991200	1720100	2112600	3846930	3613150	1.09568e+06	647858	557314	2.95023e+06	3.18419e+06	2.32556e+06	1.95861e+06	3.06909e+06	4.88495e+06	983564	734301	547754	2.56231e+06	3.20279e+06	3.59219e+06	2.54434e+06	2.70493e+06	3.16191e+06	1	1	1	2.60513	4.36169	6.55805	2.58685	3.68368	5.7725
TFC3	P34111	Transcription factor tau 138 kDa subunit OS=Saccharomyces cerevisiae (strain ATCC 204508 / S288c) GN=TFC3 PE=1 SV=1	1	1	3	3	15	6.63706	10023100	7270000	6734250	47571400	43979200	12399000	45411800	68802000	57516100	8.49362e+06	6.12825e+06	9.42751e+06	4.03122e+07	3.70723e+07	1.73578e+07	3.84821e+07	5.79966e+07	8.05188e+07	7.62452e+06	6.94593e+06	9.26579e+06	3.50116e+07	3.72889e+07	2.68118e+07	4.99902e+07	5.11151e+07	5.21178e+07	1	1	1	4.59198	5.36845	2.89364	6.55651	7.359	5.62476
RFA1	P22336	Replication factor A protein 1 OS=Saccharomyces cerevisiae (strain ATCC 204508 / S288c) GN=RFA1 PE=1 SV=1	1	1	3	3	11	6.35043	2534970	3156050	2443020	14406900	17719300	5068820	16029900	56432000	23689000	2.83089e+06	2.01008e+06	3.43485e+06	1.60887e+07	1.12854e+07	7.12669e+06	1.79011e+07	3.59414e+07	3.33064e+07	2.54122e+06	2.27828e+06	3.37593e+06	1.39732e+07	1.13513e+07	1.10083e+07	2.32545e+07	3.16768e+07	2.15584e+07	1	1	1	5.49862	4.9824	3.26082	9.1509	13.9038	6.38592
COX2	P00410	Cytochrome c oxidase subunit 2 OS=Saccharomyces cerevisiae (strain ATCC 204508 / S288c) GN=COX2 PE=1 SV=1	1	1	3	3	2	6.52284	1226850	932981	809291	6046100	6018770	2384620	2359210	4426970	3787570	1.15772e+06	783189	1.02164e+06	5.70541e+06	5.05244e+06	3.01033e+06	2.22627e+06	3.71621e+06	4.7814e+06	1.03926e+06	887689	1.00412e+06	4.95522e+06	5.08197e+06	4.64993e+06	2.89204e+06	3.27527e+06	3.09488e+06	1	1	1	4.76804	5.72494	4.63086	2.78279	3.68966	3.08219
CRH1	P53301	Probable glycosidase CRH1 OS=Saccharomyces cerevisiae (strain ATCC 204508 / S288c) GN=CRH1 PE=1 SV=1	1	1	3	3	2	5.83838	2152730	1392820	832935	4429170	2689930	2874170	1938270	2441420	3087050	1.79813e+06	1.47077e+06	944344	3.6996e+06	2.84047e+06	3.2586e+06	1.619e+06	2.57805e+06	3.49996e+06	1.61414e+06	1.66701e+06	928144	3.21315e+06	2.85706e+06	5.03343e+06	2.10316e+06	2.27215e+06	2.26544e+06	1	1	1	1.99062	1.71389	5.42311	1.30296	1.36301	2.44082
TOP1	P04786	DNA topoisomerase 1 OS=Saccharomyces cerevisiae (strain ATCC 204508 / S288c) GN=TOP1 PE=1 SV=2	1	1	3	3	10	6.67824	4450330	9211380	5799230	32856900	35076700	11102300	24550800	56015200	41515600	5.15493e+06	6.22253e+06	7.41135e+06	3.8059e+07	2.36952e+07	1.41886e+07	2.84378e+07	3.78397e+07	5.30565e+07	4.62746e+06	7.0528e+06	7.28422e+06	3.30547e+07	2.38337e+07	2.19166e+07	3.69421e+07	3.33499e+07	3.43422e+07	1	1	1	7.14316	3.37932	3.00877	7.98324	4.72861	4.7146
DLD1	P32891	D-lactate dehydrogenase [cytochrome] 1, mitochondrial OS=Saccharomyces cerevisiae (strain ATCC 204508 / S288c) GN=DLD1 PE=1 SV=2	1	1	3	3	4	6.24852	2374930	2139600	1317140	14516500	13034600	6316030	5164860	10216400	8554580	2.25985e+06	1.74064e+06	1.70148e+06	1.38131e+07	1.06041e+07	8.15903e+06	4.91459e+06	8.31141e+06	1.10508e+07	2.02862e+06	1.97289e+06	1.67229e+06	1.19968e+07	1.06661e+07	1.26029e+07	6.3843e+06	7.32523e+06	7.1529e+06	1	1	1	5.9138	5.40631	7.53632	3.14712	3.71293	4.27731
PAT1	P25644	DNA topoisomerase 2-associated protein PAT1 OS=Saccharomyces cerevisiae (strain ATCC 204508 / S288c) GN=PAT1 PE=1 SV=4	1	1	3	3	3	6.04895	1053580	518215	412160	4684550	6225810	2362320	4012810	6756500	5935770	928669	442407	547722	4.12916e+06	5.31506e+06	3.1393e+06	3.53706e+06	5.76812e+06	7.88808e+06	833645	501437	538326	3.58622e+06	5.34612e+06	4.84915e+06	4.59481e+06	5.08371e+06	5.10576e+06	1	1	1	4.30186	10.6616	9.00782	5.51172	10.1383	9.48451
IMG2	P25642	54S ribosomal protein IMG2, mitochondrial OS=Saccharomyces cerevisiae (strain ATCC 204508 / S288c) GN=IMG2 PE=1 SV=2	1	1	3	3	3	5.64162	1549800	1506140	1713810	5733060	6650630	4162160	2992890	3535330	3736640	1.60033e+06	1.41362e+06	1.76832e+06	5.92e+06	6.24208e+06	4.29455e+06	3.09048e+06	3.31815e+06	3.85549e+06	1.43658e+06	1.60224e+06	1.73799e+06	5.14159e+06	6.27856e+06	6.6336e+06	4.01469e+06	2.92444e+06	2.49556e+06	1	1	1	3.57904	3.91862	3.81683	2.79461	1.82523	1.43589
HHT1	P61830	Histone H3 OS=Saccharomyces cerevisiae (strain ATCC 204508 / S288c) GN=HHT1 PE=1 SV=2	1	1	3	3	5	7.57343	26732000	15496100	12507800	109914000	100775000	26395800	251379000	401450000	367980000	2.14794e+07	1.31507e+07	1.83427e+07	8.8317e+07	8.55223e+07	3.87095e+07	2.01985e+08	3.40689e+08	5.39643e+08	1.92816e+07	1.49054e+07	1.8028e+07	7.67043e+07	8.60221e+07	5.97929e+07	2.62389e+08	3.00265e+08	3.49298e+08	1	1	1	3.97811	5.7712	3.31666	13.6083	20.1447	19.3752
HTS1	P07263|P07263-2	Histidine--tRNA ligase, mitochondrial OS=Saccharomyces cerevisiae (strain ATCC 204508 / S288c) GN=HTS1 PE=1 SV=2|Isoform Cytoplasmic of Histidine--tRNA ligase, mitochondrial OS=Saccharomyces cerevisiae (strain ATCC 204508 / S288c) GN=HTS1	1	1	3	3	6	6.56405	2612300	2661380	1439310	24411300	31039500	8488680	18247600	33664700	29858800	2.52984e+06	1.92775e+06	2.05183e+06	2.36407e+07	2.24832e+07	1.21012e+07	1.76716e+07	2.43848e+07	4.25657e+07	2.27098e+06	2.18497e+06	2.01663e+06	2.05322e+07	2.26146e+07	1.86922e+07	2.29562e+07	2.14914e+07	2.75517e+07	1	1	1	9.04115	10.3501	9.269	10.1085	9.83603	13.6622
SCS2	P40075	Vesicle-associated membrane protein-associated protein SCS2 OS=Saccharomyces cerevisiae (strain ATCC 204508 / S288c) GN=SCS2 PE=1 SV=3	1	1	3	3	4	5.86934	1652100	1493320	1095840	8254650	6907750	3468550	5734030	9072840	7374540	1.50383e+06	1.28028e+06	1.40421e+06	7.51385e+06	5.92226e+06	4.44461e+06	5.21944e+06	7.77847e+06	9.44975e+06	1.34996e+06	1.4511e+06	1.38012e+06	6.52587e+06	5.95687e+06	6.8654e+06	6.78031e+06	6.85553e+06	6.11659e+06	1	1	1	4.83413	4.10506	4.97448	5.02261	4.72435	4.43192
TFC4	P33339	Transcription factor tau 131 kDa subunit OS=Saccharomyces cerevisiae (strain ATCC 204508 / S288c) GN=TFC4 PE=1 SV=1	1	1	3	3	4	5.77074	903042	675978	763714	6508860	6203820	2100180	6281330	8286760	7145340	787656	601622	983809	5.67719e+06	5.52142e+06	2.70543e+06	5.47873e+06	7.37524e+06	9.20456e+06	707061	681896	966933	4.93071e+06	5.55368e+06	4.17897e+06	7.11715e+06	6.50014e+06	5.95788e+06	1	1	1	6.97353	8.14446	4.32188	10.0658	9.53244	6.16163
PIN2	Q12057	[PSI+] induction protein 2 OS=Saccharomyces cerevisiae (strain ATCC 204508 / S288c) GN=PIN2 PE=1 SV=1	1	1	3	3	2	6.05621	11891700	5531220	3346270	NA	229971	563899	343215	1939610	919004	1.33263e+07	4.92682e+06	3.35235e+06	NA	204842	564924	384620	1.72767e+06	920674	1.19627e+07	5.5842e+06	3.29485e+06	NA	206039	872614	499641	1.52267e+06	595930	1	1	1	NA	0.0368967	0.264842	0.0417665	0.272675	0.180867
TGS1	Q12052	Trimethylguanosine synthase OS=Saccharomyces cerevisiae (strain ATCC 204508 / S288c) GN=TGS1 PE=1 SV=1	1	1	3	3	2	5.59684	324480	638823	724631	3919190	3562830	629620	1387760	2443730	3199590	360931	484663	858662	4.35945e+06	2.70305e+06	746077	1.54365e+06	1.85401e+06	3.7914e+06	323999	549331	843933	3.78624e+06	2.71884e+06	1.15243e+06	2.00528e+06	1.63402e+06	2.45408e+06	1	1	1	11.686	4.94938	1.36555	6.18917	2.97457	2.90791
RPL27A|RPL27B	P0C2H6|P0C2H7	60S ribosomal protein L27-A OS=Saccharomyces cerevisiae (strain ATCC 204508 / S288c) GN=RPL27A PE=1 SV=1|60S ribosomal protein L27-B OS=Saccharomyces cerevisiae (strain ATCC 204508 / S288c) GN=RPL27B PE=1 SV=1	1	1	3	3	5	7.39931	3962000	6228760	5391970	77307800	85896900	19665700	40874000	55956400	56139200	4.01895e+06	4.72482e+06	7.00755e+06	7.8419e+07	6.5157e+07	2.55581e+07	4.14615e+07	4.24456e+07	7.296e+07	3.60772e+06	5.35525e+06	6.88734e+06	6.81078e+07	6.55377e+07	3.94785e+07	5.38606e+07	3.74093e+07	4.72252e+07	1	1	1	18.8784	12.238	5.73203	14.9293	6.98554	6.85681
RPS1A	P33442	40S ribosomal protein S1-A OS=Saccharomyces cerevisiae (strain ATCC 204508 / S288c) GN=RPS1A PE=1 SV=2	1	1	3	3	2	7.07683	715807	532694	287169	21340000	22182400	3750130	11013800	16656800	14559200	559573	395204	495146	1.66823e+07	1.64571e+07	6.4661e+06	8.60989e+06	1.23576e+07	2.51034e+07	502315	447936	486652	1.44887e+07	1.65532e+07	9.98791e+06	1.11847e+07	1.08913e+07	1.62488e+07	1	1	1	28.8439	36.9544	20.5237	22.2662	24.3145	33.389
FAS1	P07149	Fatty acid synthase subunit beta OS=Saccharomyces cerevisiae (strain ATCC 204508 / S288c) GN=FAS1 PE=1 SV=2	1	1	3	3	13	6.37996	32374200	22668800	6747470	32974300	29134700	17348400	19319100	29347400	32912000	2.66838e+07	1.90749e+07	9.72879e+06	2.71784e+07	2.45157e+07	2.50137e+07	1.59234e+07	2.46946e+07	4.74539e+07	2.39534e+07	2.162e+07	9.5619e+06	2.36048e+07	2.46589e+07	3.86376e+07	2.06853e+07	2.17645e+07	3.07158e+07	1	1	1	0.985445	1.14056	4.04078	0.863562	1.00668	3.21231
CYT1	P07143	Cytochrome c1, heme protein, mitochondrial OS=Saccharomyces cerevisiae (strain ATCC 204508 / S288c) GN=CYT1 PE=1 SV=1	1	1	3	3	3	6.46615	2881690	1764040	1458560	11376300	13771400	7441190	5192840	7278470	7697490	2.6738e+06	1.61621e+06	1.71574e+06	1.05556e+07	1.26174e+07	8.75326e+06	4.81822e+06	6.66854e+06	9.05476e+06	2.40021e+06	1.83187e+06	1.68631e+06	9.16766e+06	1.26911e+07	1.35208e+07	6.25911e+06	5.87729e+06	5.86092e+06	1	1	1	3.81953	6.92796	8.01798	2.60774	3.20836	3.47559
RPB8	P20436	DNA-directed RNA polymerases I, II, and III subunit RPABC3 OS=Saccharomyces cerevisiae (strain ATCC 204508 / S288c) GN=RPB8 PE=1 SV=1	1	1	3	3	3	6.18971	1171390	1718240	1507450	9900070	12793800	3558340	18186200	25408700	16407300	1.18448e+06	1.25578e+06	2.0398e+06	1.00107e+07	9.3504e+06	4.81494e+06	1.83894e+07	1.85701e+07	2.22014e+07	1.06328e+06	1.42334e+06	2.0048e+06	8.6944e+06	9.40504e+06	7.43744e+06	2.38887e+07	1.63666e+07	1.43704e+07	1	1	1	8.17697	6.60772	3.70981	22.4671	11.4987	7.168
RPB4	P20433	DNA-directed RNA polymerase II subunit RPB4 OS=Saccharomyces cerevisiae (strain ATCC 204508 / S288c) GN=RPB4 PE=1 SV=1	1	1	3	3	2	5.75178	2917300	1461330	2517770	3011450	3296990	3391940	5364570	5417260	4276210	2.65557e+06	1.61984e+06	2.49526e+06	2.74127e+06	3.65462e+06	3.36161e+06	4.88327e+06	6.00488e+06	4.23797e+06	2.38384e+06	1.83598e+06	2.45245e+06	2.38083e+06	3.67598e+06	5.19254e+06	6.34362e+06	5.29238e+06	2.74313e+06	1	1	1	0.998735	2.00219	2.11728	2.66109	2.88259	1.11853
YJR005C-A	Q3E827	Uncharacterized protein YJR005C-A OS=Saccharomyces cerevisiae (strain ATCC 204508 / S288c) GN=YJR005C-A PE=4 SV=1	1	1	3	3	2	5.96664	1167730	758648	1329340	9463940	9810860	1644280	5690520	4089240	6361970	910971	753809	1.71495e+06	7.38302e+06	9.74828e+06	2.12125e+06	4.4393e+06	4.06316e+06	8.20745e+06	817758	854389	1.68554e+06	6.41225e+06	9.80525e+06	3.27661e+06	5.76687e+06	3.58105e+06	5.31248e+06	1	1	1	7.84125	11.4763	1.94396	7.05205	4.19135	3.1518
NOP12	Q08208	Nucleolar protein 12 OS=Saccharomyces cerevisiae (strain ATCC 204508 / S288c) GN=NOP12 PE=1 SV=1	1	1	3	3	3	6.12918	1044270	1437850	802856	9335910	8584600	2482710	3832180	6004310	5446780	982272	1.0764e+06	1.14015e+06	8.78164e+06	6.42656e+06	3.52573e+06	3.60466e+06	4.49491e+06	7.73504e+06	881763	1.22002e+06	1.12059e+06	7.62696e+06	6.46411e+06	5.44604e+06	4.68264e+06	3.96158e+06	5.0067e+06	1	1	1	8.64967	5.29837	4.85999	5.31054	3.24714	4.46792
GPD1	Q00055	Glycerol-3-phosphate dehydrogenase [NAD(+)] 1 OS=Saccharomyces cerevisiae (strain ATCC 204508 / S288c) GN=GPD1 PE=1 SV=4	1	1	3	3	2	6.62007	2229460	3190310	669688	8440020	8217320	5312000	6490010	10383200	11871300	2.1659e+06	2.37266e+06	926896	8.1994e+06	6.1113e+06	7.35218e+06	6.30498e+06	7.72208e+06	1.64307e+07	1.94428e+06	2.68925e+06	910996	7.12128e+06	6.14701e+06	1.13566e+07	8.19049e+06	6.80583e+06	1.06352e+07	1	1	1	3.66268	2.28577	12.4662	4.21261	2.53076	11.6743
RPP0	P05317	60S acidic ribosomal protein P0 OS=Saccharomyces cerevisiae (strain ATCC 204508 / S288c) GN=RPP0 PE=1 SV=2	1	1	3	3	11	7.98007	27023100	11257100	7865650	286448000	303272000	123808000	73388900	109550000	108977000	2.14096e+07	1.02521e+07	1.09012e+07	2.26945e+08	2.76198e+08	1.71588e+08	5.81439e+07	9.977e+07	1.51034e+08	1.92189e+07	1.16201e+07	1.07142e+07	1.97104e+08	2.77811e+08	2.65045e+08	7.55319e+07	8.79319e+07	9.77603e+07	1	1	1	10.2557	23.9079	24.7378	3.93008	7.56725	9.12439
VPS5	Q92331	Vacuolar protein sorting-associated protein 5 OS=Saccharomyces cerevisiae (strain ATCC 204508 / S288c) GN=VPS5 PE=1 SV=1	1	1	3	3	3	5.82216	1223590	1415710	925491	6377720	7408250	3838560	5017660	8240820	7964330	1.28873e+06	1.1452e+06	1.08627e+06	6.71727e+06	5.99271e+06	4.5054e+06	5.2848e+06	6.6662e+06	9.3479e+06	1.15687e+06	1.29801e+06	1.06763e+06	5.83403e+06	6.02773e+06	6.9593e+06	6.86522e+06	5.87523e+06	6.05067e+06	1	1	1	5.04296	4.64384	6.51843	5.93432	4.52635	5.66736
ADE4	P04046	Amidophosphoribosyltransferase OS=Saccharomyces cerevisiae (strain ATCC 204508 / S288c) GN=ADE4 PE=1 SV=2	1	1	3	3	2	5.69251	440698	440694	326358	3316030	2771110	1557810	1730090	2917940	3097270	434362	387408	376662	3.26836e+06	2.43604e+06	1.79793e+06	1.70522e+06	2.56512e+06	3.57468e+06	389917	439099	370201	2.83861e+06	2.45028e+06	2.77718e+06	2.21516e+06	2.26076e+06	2.3138e+06	1	1	1	7.28003	5.58024	7.50183	5.68111	5.14862	6.25012
NCE102	Q12207	Non-classical export protein 2 OS=Saccharomyces cerevisiae (strain ATCC 204508 / S288c) GN=NCE102 PE=1 SV=1	1	1	3	3	2	6.0118	381527	474941	310365	733731	698816	441967	603121	810348	847216	385451	410848	355130	741278	604511	505713	609324	700992	969412	346011	465667	349038	643809	608044	781153	791543	617817	627476	1	1	1	1.86066	1.30575	2.23802	2.28763	1.32673	1.79773
RAD51	P25454	DNA repair protein RAD51 OS=Saccharomyces cerevisiae (strain ATCC 204508 / S288c) GN=RAD51 PE=1 SV=1	1	1	3	3	2	6.06753	1101850	979550	754592	2694470	2945410	1735180	1855580	3263350	2778810	1.11678e+06	830394	878234	2.73098e+06	2.49691e+06	2.01949e+06	1.88072e+06	2.76644e+06	3.23412e+06	1.00251e+06	941193	863168	2.37189e+06	2.5115e+06	3.11943e+06	2.44315e+06	2.43819e+06	2.09337e+06	1	1	1	2.36596	2.66843	3.61393	2.43704	2.59053	2.42522
INP52	P50942	Polyphosphatidylinositol phosphatase INP52 OS=Saccharomyces cerevisiae (strain ATCC 204508 / S288c) GN=INP52 PE=1 SV=1	1	1	3	3	4	5.74799	8189390	4250190	1837220	4101590	6361730	5772170	3557310	6824380	4829710	7.82244e+06	3.5123e+06	2.32748e+06	3.91781e+06	5.25725e+06	7.31248e+06	3.39791e+06	5.63958e+06	6.11852e+06	7.02203e+06	3.98095e+06	2.28756e+06	3.40266e+06	5.28797e+06	1.12953e+07	4.41406e+06	4.97042e+06	3.96037e+06	1	1	1	0.48457	1.32832	4.9377	0.628602	1.24855	1.73127
YLR455W	Q06188	PWWP domain-containing protein YLR455W OS=Saccharomyces cerevisiae (strain ATCC 204508 / S288c) GN=YLR455W PE=1 SV=1	1	1	3	3	6	7.09205	7579440	3381990	3233400	26552300	26927700	6679910	54649100	66613200	61565400	5.61018e+06	3.0524e+06	4.84006e+06	1.96536e+07	2.43035e+07	9.99912e+06	4.04504e+07	6.01215e+07	9.21569e+07	5.03613e+06	3.45968e+06	4.75703e+06	1.70694e+07	2.44455e+07	1.54452e+07	5.2547e+07	5.29878e+07	5.96509e+07	1	1	1	3.38938	7.06582	3.24682	10.434	15.3158	12.5395
GLO3	P38682	ADP-ribosylation factor GTPase-activating protein GLO3 OS=Saccharomyces cerevisiae (strain ATCC 204508 / S288c) GN=GLO3 PE=1 SV=1	1	1	3	3	2	6.06857	362989	379711	378870	2715620	2570350	837931	1788840	3892480	2985810	368959	298831	473623	2.76029e+06	2.02285e+06	1.04749e+06	1.81826e+06	3.06336e+06	3.73254e+06	331206	338704	465499	2.39734e+06	2.03467e+06	1.61802e+06	2.36201e+06	2.69988e+06	2.41598e+06	1	1	1	7.23821	6.00724	3.47588	7.13155	7.97123	5.1901
PRS3	P38689	Ribose-phosphate pyrophosphokinase 3 OS=Saccharomyces cerevisiae (strain ATCC 204508 / S288c) GN=PRS3 PE=1 SV=1	1	1	3	3	3	6.09589	2019050	2339360	1375690	3928550	4653410	2449940	3211860	5515500	5401350	2.13943e+06	1.8627e+06	1.63051e+06	4.16278e+06	3.70524e+06	2.90375e+06	3.40336e+06	4.39168e+06	6.40186e+06	1.92052e+06	2.11124e+06	1.60254e+06	3.61542e+06	3.72689e+06	4.4853e+06	4.42113e+06	3.87059e+06	4.14376e+06	1	1	1	1.88253	1.76527	2.79886	2.30205	1.83333	2.58574
SRP72	P38688	Signal recognition particle subunit SRP72 OS=Saccharomyces cerevisiae (strain ATCC 204508 / S288c) GN=SRP72 PE=1 SV=2	1	1	3	3	2	6.0783	541807	551769	355396	5338930	3800660	1909740	3752810	3914250	5372430	465278	520102	439049	4.58482e+06	3.58254e+06	2.35925e+06	3.22273e+06	3.68961e+06	6.63699e+06	417669	589499	431518	3.98197e+06	3.60347e+06	3.64424e+06	4.18649e+06	3.25182e+06	4.29596e+06	1	1	1	9.53379	6.11276	8.44517	10.0235	5.51624	9.95547
MRPS17	Q03246	37S ribosomal protein S17, mitochondrial OS=Saccharomyces cerevisiae (strain ATCC 204508 / S288c) GN=MRPS17 PE=1 SV=1	1	1	3	3	3	6.04828	1195800	1369150	872187	7220370	7280660	2975910	6790660	13299300	10322200	1.20015e+06	1.04694e+06	1.13648e+06	7.24663e+06	5.56725e+06	3.87769e+06	6.81536e+06	1.01695e+07	1.34501e+07	1.07735e+06	1.18663e+06	1.11699e+06	6.29379e+06	5.59978e+06	5.9897e+06	8.8535e+06	8.96283e+06	8.70592e+06	1	1	1	5.84193	4.71906	5.36237	8.21787	7.55318	7.79411
ENO2	P00925	Enolase 2 OS=Saccharomyces cerevisiae (strain ATCC 204508 / S288c) GN=ENO2 PE=1 SV=2	1	1	3	3	5	6.47997	10398100	11426100	9248690	39082000	35907200	23364900	24692700	41783500	41542400	1.08999e+07	1.00193e+07	1.00617e+07	4.09681e+07	3.14863e+07	2.54187e+07	2.58844e+07	3.66392e+07	4.51941e+07	9.7846e+06	1.13562e+07	9.88908e+06	3.55813e+07	3.16703e+07	3.92633e+07	3.36251e+07	3.22918e+07	2.9253e+07	1	1	1	3.63646	2.78881	3.97037	3.43653	2.84354	2.95811
ENO1	P00924	Enolase 1 OS=Saccharomyces cerevisiae (strain ATCC 204508 / S288c) GN=ENO1 PE=1 SV=3	1	1	3	3	5	7.11217	6816860	5168430	2950600	32363400	29915000	16743800	12458700	30959400	25728900	6.65488e+06	4.19377e+06	3.72484e+06	3.15944e+07	2.42737e+07	2.11374e+07	1.21627e+07	2.51211e+07	3.24802e+07	5.97393e+06	4.75335e+06	3.66095e+06	2.74401e+07	2.44155e+07	3.26501e+07	1.57999e+07	2.21404e+07	2.10237e+07	1	1	1	4.59331	5.13649	8.91847	2.64481	4.65785	5.74268
YGR266W	P53326	Uncharacterized protein YGR266W OS=Saccharomyces cerevisiae (strain ATCC 204508 / S288c) GN=YGR266W PE=1 SV=1	1	1	3	3	2	5.75293	1238770	678469	754791	5797270	4958210	2834640	2310930	5747080	4017720	1.17115e+06	609610	888550	5.48083e+06	4.455e+06	3.33697e+06	2.18479e+06	5.1638e+06	4.72971e+06	1.05132e+06	690950	873307	4.76017e+06	4.48103e+06	5.15448e+06	2.83815e+06	4.5511e+06	3.06143e+06	1	1	1	4.52781	6.48531	5.90226	2.69962	6.58672	3.50555
YNL247W	P53852	Cysteine--tRNA ligase OS=Saccharomyces cerevisiae (strain ATCC 204508 / S288c) GN=YNL247W PE=1 SV=1	1	1	3	3	11	6.51332	8128400	5363410	4153110	39009200	43453800	8930650	25867100	42301200	37536200	6.81246e+06	4.22772e+06	6.28651e+06	3.26938e+07	3.42525e+07	1.35182e+07	2.16794e+07	3.3344e+07	5.68181e+07	6.11539e+06	4.79182e+06	6.17867e+06	2.8395e+07	3.44527e+07	2.0881e+07	2.81626e+07	2.93876e+07	3.6777e+07	1	1	1	4.6432	7.1899	3.37953	4.6052	6.13287	5.95224
YAT2	P40017	Carnitine O-acetyltransferase YAT2 OS=Saccharomyces cerevisiae (strain ATCC 204508 / S288c) GN=YAT2 PE=1 SV=1	1	1	3	3	3	6.29633	4208110	3153570	2869660	16221500	13009200	9959350	10264800	15772200	14892700	3.9463e+06	3.03692e+06	3.17759e+06	1.52123e+07	1.2528e+07	1.1028e+07	9.62616e+06	1.51888e+07	1.64908e+07	3.5425e+06	3.44213e+06	3.12308e+06	1.3212e+07	1.26012e+07	1.70345e+07	1.25049e+07	1.33866e+07	1.06741e+07	1	1	1	3.72958	3.66087	5.45441	3.52996	3.88903	3.4178
RPL6A	Q02326	60S ribosomal protein L6-A OS=Saccharomyces cerevisiae (strain ATCC 204508 / S288c) GN=RPL6A PE=1 SV=2	1	1	3	3	3	6.53311	1109040	1356500	1183770	12023000	17437600	3879560	5876450	8335510	9044540	1.14512e+06	1.02976e+06	1.51025e+06	1.24141e+07	1.32374e+07	4.94954e+06	6.06761e+06	6.32772e+06	1.1539e+07	1.02795e+06	1.16716e+06	1.48435e+06	1.07818e+07	1.33147e+07	7.64535e+06	7.88213e+06	5.57691e+06	7.46892e+06	1	1	1	10.4887	11.4078	5.15065	7.66785	4.7782	5.03179
GPT2	P36148	Glycerol-3-phosphate O-acyltransferase 2 OS=Saccharomyces cerevisiae (strain ATCC 204508 / S288c) GN=GPT2 PE=1 SV=1	1	1	3	3	4	5.63711	911199	1233550	825632	6069140	4934170	2429380	3288260	10672000	5731410	997513	883402	1.05312e+06	6.64404e+06	3.53359e+06	3.09876e+06	3.59974e+06	7.64271e+06	7.31062e+06	895444	1.00127e+06	1.03506e+06	5.77043e+06	3.55424e+06	4.78653e+06	4.67624e+06	6.73588e+06	4.73199e+06	1	1	1	6.44421	3.54971	4.6244	5.22226	6.7273	4.57171
IOC2	Q12072	ISWI one complex protein 2 OS=Saccharomyces cerevisiae (strain ATCC 204508 / S288c) GN=IOC2 PE=1 SV=1	1	1	3	3	6	6.36333	2427010	2516930	2955790	21254500	21827200	5598320	24180400	43920200	31224800	2.368e+06	1.9709e+06	3.86873e+06	2.07377e+07	1.7092e+07	7.32745e+06	2.35925e+07	3.43921e+07	4.08691e+07	2.1257e+06	2.23388e+06	3.80237e+06	1.8011e+07	1.71919e+07	1.13184e+07	3.06478e+07	3.03113e+07	2.64536e+07	1	1	1	8.47296	7.69596	2.97667	14.4178	13.5689	6.95712
POR1	P04840	Mitochondrial outer membrane protein porin 1 OS=Saccharomyces cerevisiae (strain ATCC 204508 / S288c) GN=POR1 PE=1 SV=4	1	1	3	3	6	6.91363	8230400	7956280	3059100	52511700	28410300	32200900	21545600	31742100	34633300	7.15135e+06	7.54076e+06	3.71468e+06	4.56272e+07	2.69266e+07	3.91017e+07	1.87209e+07	3.00844e+07	4.20553e+07	6.41961e+06	8.54692e+06	3.65096e+06	3.96277e+07	2.70839e+07	6.03987e+07	2.43193e+07	2.65147e+07	2.72214e+07	1	1	1	6.17292	3.16885	16.5433	3.78829	3.10226	7.45597
RPB5	P20434	DNA-directed RNA polymerases I, II, and III subunit RPABC1 OS=Saccharomyces cerevisiae (strain ATCC 204508 / S288c) GN=RPB5 PE=1 SV=1	1	1	3	3	2	6.01886	1551950	2496250	1662600	15287500	17702000	3339890	23114900	30491200	21370200	1.44673e+06	1.72454e+06	2.58162e+06	1.42511e+07	1.22295e+07	5.18604e+06	2.15478e+07	2.10649e+07	3.31827e+07	1.2987e+06	1.95464e+06	2.53733e+06	1.23772e+07	1.23009e+07	8.01066e+06	2.79917e+07	1.85655e+07	2.14784e+07	1	1	1	9.53047	6.29318	3.15712	21.5536	9.49814	8.46495
RVB2	Q12464	RuvB-like protein 2 OS=Saccharomyces cerevisiae (strain ATCC 204508 / S288c) GN=RVB2 PE=1 SV=1	1	1	3	3	8	6.60828	3557810	2627230	2839410	21899500	19171600	6917850	16869100	28856500	24826500	3.2225e+06	2.30115e+06	3.57907e+06	1.98356e+07	1.67921e+07	8.71994e+06	1.52793e+07	2.5275e+07	3.12938e+07	2.89277e+06	2.60819e+06	3.51768e+06	1.72274e+07	1.68902e+07	1.34693e+07	1.98485e+07	2.2276e+07	2.02557e+07	1	1	1	5.95535	6.47584	3.82904	6.86144	8.54078	5.75826
NOP56	Q12460	Nucleolar protein 56 OS=Saccharomyces cerevisiae (strain ATCC 204508 / S288c) GN=NOP56 PE=1 SV=1	1	1	3	3	7	6.95893	4258540	4252530	3120680	32342300	29062900	7041640	24002300	35640800	32094500	3.70308e+06	3.36047e+06	4.54145e+06	2.81237e+07	2.29663e+07	1.02475e+07	2.08716e+07	2.81644e+07	4.67064e+07	3.32417e+06	3.80885e+06	4.46355e+06	2.44258e+07	2.31005e+07	1.58289e+07	2.71132e+07	2.48225e+07	3.02319e+07	1	1	1	7.34795	6.06495	3.54627	8.15639	6.51707	6.77306
SGV1	P23293	Serine/threonine-protein kinase BUR1 OS=Saccharomyces cerevisiae (strain ATCC 204508 / S288c) GN=SGV1 PE=1 SV=1	1	1	3	3	2	5.4337	462461	871037	663504	1711360	2417110	831790	1012770	2514280	2424590	603804	606156	730256	2.23441e+06	1.68207e+06	915472	1.32231e+06	1.74969e+06	2.66852e+06	542021	687035	717729	1.94061e+06	1.6919e+06	1.41409e+06	1.71774e+06	1.54208e+06	1.72726e+06	1	1	1	3.58032	2.46261	1.97023	3.16914	2.24455	2.40657
SMC4	Q12267	Structural maintenance of chromosomes protein 4 OS=Saccharomyces cerevisiae (strain ATCC 204508 / S288c) GN=SMC4 PE=1 SV=1	1	1	3	3	8	6.18063	4887640	4397810	3942990	19580900	19882200	8129400	17222400	24147500	25325600	4.6438e+06	3.84735e+06	4.74381e+06	1.8604e+07	1.73936e+07	9.78047e+06	1.63632e+07	2.1125e+07	3.04692e+07	4.16863e+06	4.3607e+06	4.66243e+06	1.61578e+07	1.74952e+07	1.51075e+07	2.12566e+07	1.86184e+07	1.9722e+07	1	1	1	3.87605	4.01203	3.24026	5.09918	4.26961	4.22997
FRS1	P15624	Phenylalanine--tRNA ligase beta subunit OS=Saccharomyces cerevisiae (strain ATCC 204508 / S288c) GN=FRS1 PE=1 SV=3	1	1	3	3	4	5.91774	1288490	1215750	874812	7180100	6780450	2933640	8247270	14540500	12706500	1.2327e+06	1.00054e+06	1.11109e+06	6.86921e+06	5.58018e+06	3.72599e+06	7.89017e+06	1.19665e+07	1.61384e+07	1.10657e+06	1.13404e+06	1.09203e+06	5.96599e+06	5.61278e+06	5.75537e+06	1.02497e+07	1.05467e+07	1.0446e+07	1	1	1	5.39145	4.94937	5.27034	9.26264	9.30009	9.56566
FRS2	P15625	Phenylalanine--tRNA ligase alpha subunit OS=Saccharomyces cerevisiae (strain ATCC 204508 / S288c) GN=FRS2 PE=1 SV=3	1	1	3	3	4	5.86074	1175710	2198370	1622640	6847880	7484160	2754030	8817890	16414300	12752500	1.33097e+06	1.59424e+06	1.97652e+06	7.75218e+06	5.42745e+06	3.35466e+06	9.98234e+06	1.19035e+07	1.55337e+07	1.19478e+06	1.80696e+06	1.94262e+06	6.73286e+06	5.45916e+06	5.1818e+06	1.29676e+07	1.04911e+07	1.00546e+07	1	1	1	5.63523	3.02119	2.66743	10.8535	5.80595	5.17579
RPL25	P04456	60S ribosomal protein L25 OS=Saccharomyces cerevisiae (strain ATCC 204508 / S288c) GN=RPL25 PE=1 SV=4	1	1	3	3	7	7.89285	8441090	8272540	5624320	74000200	74779000	22598400	34507200	41884600	44408200	7.42371e+06	6.84254e+06	7.7316e+06	6.50812e+07	6.18526e+07	3.10654e+07	3.03481e+07	3.46444e+07	6.10467e+07	6.66409e+06	7.75554e+06	7.59897e+06	5.65238e+07	6.22141e+07	4.79854e+07	3.94238e+07	3.05337e+07	3.9514e+07	1	1	1	8.48184	8.02189	6.31473	5.91585	3.93702	5.19992
KAR2	P16474	78 kDa glucose-regulated protein homolog OS=Saccharomyces cerevisiae (strain ATCC 204508 / S288c) GN=KAR2 PE=1 SV=1	1	1	3	3	5	6.54302	6892100	4841350	2694370	17253000	15159300	9641250	11656800	29453300	19041200	6.4576e+06	3.91163e+06	3.55915e+06	1.61653e+07	1.22481e+07	1.27357e+07	1.09219e+07	2.37972e+07	2.51527e+07	5.79683e+06	4.43356e+06	3.4981e+06	1.40398e+07	1.23197e+07	1.96723e+07	1.41881e+07	2.09735e+07	1.62807e+07	1	1	1	2.42197	2.77874	5.62371	2.44756	4.73064	4.65415
ALD6	P54115	Magnesium-activated aldehyde dehydrogenase, cytosolic OS=Saccharomyces cerevisiae (strain ATCC 204508 / S288c) GN=ALD6 PE=1 SV=4	1	1	3	3	6	6.29411	4304020	3148710	2613530	23786700	15191500	10190300	9546510	13914000	13105600	3.67829e+06	3.05863e+06	3.14819e+06	2.03286e+07	1.47569e+07	1.2275e+07	8.15862e+06	1.3516e+07	1.57866e+07	3.30192e+06	3.46675e+06	3.09418e+06	1.76556e+07	1.48431e+07	1.89606e+07	1.05985e+07	1.19122e+07	1.02183e+07	1	1	1	5.34707	4.28158	6.12782	3.20979	3.43614	3.30243
MSY1	P48527	Tyrosine--tRNA ligase, mitochondrial OS=Saccharomyces cerevisiae (strain ATCC 204508 / S288c) GN=MSY1 PE=1 SV=1	1	1	3	3	4	6.11151	2249790	1158310	1078860	9570100	10772700	6235260	7120190	17868400	12163900	2.18737e+06	993979	1.2931e+06	9.30459e+06	9.24436e+06	7.47345e+06	6.92265e+06	1.53334e+07	1.45794e+07	1.96355e+06	1.12661e+06	1.27092e+06	8.08115e+06	9.29838e+06	1.15439e+07	8.99287e+06	1.3514e+07	9.43688e+06	1	1	1	4.11557	8.25345	9.08315	4.57989	11.9953	7.42526
RPT6	Q01939	26S protease regulatory subunit 8 homolog OS=Saccharomyces cerevisiae (strain ATCC 204508 / S288c) GN=RPT6 PE=1 SV=4	1	1	3	3	4	5.99406	1629110	1349150	1509190	10982000	6934200	4949310	5872840	7814980	9371630	1.49573e+06	1.39785e+06	1.5865e+06	1.00829e+07	7.18452e+06	5.20283e+06	5.39202e+06	8.0971e+06	9.85168e+06	1.34268e+06	1.58437e+06	1.55928e+06	8.7571e+06	7.22651e+06	8.0366e+06	7.0045e+06	7.13635e+06	6.37675e+06	1	1	1	6.52209	4.56113	5.15404	5.21679	4.50422	4.08954
LPD1	P09624	Dihydrolipoyl dehydrogenase, mitochondrial OS=Saccharomyces cerevisiae (strain ATCC 204508 / S288c) GN=LPD1 PE=1 SV=1	1	1	3	3	9	6.77582	5067170	4587580	3337750	32791900	31370000	17003900	24225300	42888500	38337400	4.96256e+06	3.89623e+06	4.01285e+06	3.21149e+07	2.66425e+07	2.04431e+07	2.37252e+07	3.64252e+07	4.60916e+07	4.45477e+06	4.4161e+06	3.94401e+06	2.78922e+07	2.67982e+07	3.15776e+07	3.08202e+07	3.21032e+07	2.98339e+07	1	1	1	6.26119	6.0683	8.00648	6.91846	7.26958	7.56437
YNL181W	P53878	Uncharacterized oxidoreductase YNL181W OS=Saccharomyces cerevisiae (strain ATCC 204508 / S288c) GN=YNL181W PE=1 SV=2	1	1	3	3	2	6.4275	585190	556937	574151	2660580	2765720	1171190	2057920	3856310	3855990	612169	474263	644523	2.78324e+06	2.35517e+06	1.31474e+06	2.1528e+06	3.28386e+06	4.32861e+06	549530	537544	633467	2.41728e+06	2.36893e+06	2.03082e+06	2.79659e+06	2.89422e+06	2.8018e+06	1	1	1	4.39881	4.40695	3.20589	5.08906	5.38416	4.42296
IPI3	P53877	Pre-rRNA-processing protein IPI3 OS=Saccharomyces cerevisiae (strain ATCC 204508 / S288c) GN=IPI3 PE=1 SV=1	1	1	3	3	2	5.62823	305068	319517	422758	1799200	2359490	908740	1032740	2667930	1861620	360352	247448	462137	2.12525e+06	1.8273e+06	993387	1.21989e+06	2.06617e+06	2.03503e+06	323480	280465	454209	1.8458e+06	1.83797e+06	1.53444e+06	1.5847e+06	1.82101e+06	1.31722e+06	1	1	1	5.70609	6.5533	3.37827	4.89892	6.49281	2.90003
ICL1	P28240	Isocitrate lyase OS=Saccharomyces cerevisiae (strain ATCC 204508 / S288c) GN=ICL1 PE=1 SV=1	1	1	3	3	12	7.21175	18727600	14685400	9914050	110396000	78093300	39727500	65599200	111449000	111534000	1.64143e+07	1.31284e+07	1.26528e+07	9.67594e+07	6.98135e+07	5.07021e+07	5.74961e+07	9.96327e+07	1.42345e+08	1.47347e+07	1.48801e+07	1.24357e+07	8.40367e+07	7.02215e+07	7.83174e+07	7.46903e+07	8.78109e+07	9.21363e+07	1	1	1	5.70331	4.71915	6.29777	5.069	5.90123	7.409
RSM18	P40033	37S ribosomal protein RSM18, mitochondrial OS=Saccharomyces cerevisiae (strain ATCC 204508 / S288c) GN=RSM18 PE=1 SV=2	1	1	3	3	2	5.84983	1078640	988138	969073	6706180	7719000	3519140	2826300	4148040	4154720	1.08707e+06	860954	1.10361e+06	6.75857e+06	6.72548e+06	4.00769e+06	2.84838e+06	3.61414e+06	4.73151e+06	975835	975831	1.08468e+06	5.8699e+06	6.76478e+06	6.19052e+06	3.70019e+06	3.18531e+06	3.06259e+06	1	1	1	6.01526	6.93233	5.70725	3.79182	3.2642	2.82351
JHD1	P40034	JmjC domain-containing histone demethylation protein 1 OS=Saccharomyces cerevisiae (strain ATCC 204508 / S288c) GN=JHD1 PE=1 SV=1	1	1	3	3	3	5.66936	670715	774282	503450	3470970	3276120	1157760	2684640	6705630	4350990	678154	560723	687570	3.50947e+06	2.37251e+06	1.58117e+06	2.71441e+06	4.85611e+06	5.94222e+06	608763	635540	675776	3.04801e+06	2.38638e+06	2.44237e+06	3.52616e+06	4.27991e+06	3.84625e+06	1	1	1	5.0069	3.75488	3.61417	5.79234	6.7343	5.69161
ALA1	P40825|P40825-2	Alanine--tRNA ligase, mitochondrial OS=Saccharomyces cerevisiae (strain ATCC 204508 / S288c) GN=ALA1 PE=1 SV=3|Isoform Cytoplasmic of Alanine--tRNA ligase, mitochondrial OS=Saccharomyces cerevisiae (strain ATCC 204508 / S288c) GN=ALA1	1	1	3	3	7	6.03919	2977280	3179480	2343470	12801400	12126200	6872990	12588900	17472900	18188900	2.92678e+06	2.79125e+06	2.71548e+06	1.25842e+07	1.06455e+07	7.96404e+06	1.23754e+07	1.53394e+07	2.10763e+07	2.6273e+06	3.16369e+06	2.6689e+06	1.09296e+07	1.07077e+07	1.23017e+07	1.60762e+07	1.35193e+07	1.36422e+07	1	1	1	4.16	3.38458	4.60928	6.11891	4.27328	5.11153
TAL1	P15019	Transaldolase OS=Saccharomyces cerevisiae (strain ATCC 204508 / S288c) GN=TAL1 PE=1 SV=4	1	1	3	3	4	6.16432	2926530	2931960	1727050	14095200	11598300	7143740	10599000	17600100	16893200	2.79098e+06	2.51827e+06	2.10842e+06	1.34423e+07	9.96181e+06	8.72124e+06	1.01081e+07	1.51168e+07	2.06236e+07	2.5054e+06	2.85428e+06	2.07225e+06	1.16748e+07	1.002e+07	1.34713e+07	1.31309e+07	1.33231e+07	1.33491e+07	1	1	1	4.65987	3.51053	6.50081	5.24104	4.66777	6.44185
RSA4	P25382	Ribosome assembly protein 4 OS=Saccharomyces cerevisiae (strain ATCC 204508 / S288c) GN=RSA4 PE=1 SV=3	1	1	3	3	2	5.84765	1029960	640952	833546	5413740	5895510	4149580	4126920	7571700	5384260	1.03067e+06	596478	895074	5.4175e+06	5.48644e+06	4.45588e+06	4.12978e+06	7.04632e+06	5.7817e+06	925213	676066	879720	4.70516e+06	5.5185e+06	6.88281e+06	5.3648e+06	6.21025e+06	3.74235e+06	1	1	1	5.08549	8.16266	7.82387	5.79844	9.18586	4.25403
SPP1	Q03012	COMPASS component SPP1 OS=Saccharomyces cerevisiae (strain ATCC 204508 / S288c) GN=SPP1 PE=1 SV=1	1	1	3	3	10	8.33915	12033900	18875300	13210200	178719000	159143000	65531100	254835000	369326000	332923000	1.21177e+07	1.50253e+07	1.64804e+07	1.79963e+08	1.26682e+08	8.17534e+07	2.56609e+08	2.93994e+08	4.15339e+08	1.08778e+07	1.70301e+07	1.61977e+07	1.563e+08	1.27423e+08	1.26281e+08	3.33348e+08	2.5911e+08	2.68838e+08	1	1	1	14.3688	7.4822	7.79623	30.6449	15.2149	16.5973
CPR1	P14832	Peptidyl-prolyl cis-trans isomerase OS=Saccharomyces cerevisiae (strain ATCC 204508 / S288c) GN=CPR1 PE=1 SV=3	1	1	3	3	2	5.66184	854016	1057010	861813	3721130	3969720	3946710	2318830	2025270	2241730	870948	1.02794e+06	868957	3.7949e+06	3.86054e+06	3.97943e+06	2.3648e+06	1.96957e+06	2.26031e+06	781830	1.1651e+06	854051	3.29592e+06	3.8831e+06	6.14685e+06	3.072e+06	1.73587e+06	1.46305e+06	1	1	1	4.21565	3.33286	7.19729	3.92924	1.4899	1.71307
SSA3	P09435	Heat shock protein SSA3 OS=Saccharomyces cerevisiae (strain ATCC 204508 / S288c) GN=SSA3 PE=1 SV=3	1	1	3	3	3	5.9854	1317970	1086220	1143690	3328120	3373680	13642500	2231010	4486970	3440610	1.68688e+06	1.16943e+06	829995	4.25968e+06	3.63211e+06	9.90059e+06	2.85548e+06	4.83068e+06	2.49691e+06	1.51427e+06	1.32546e+06	815757	3.69958e+06	3.65333e+06	1.5293e+07	3.70941e+06	4.2575e+06	1.61619e+06	1	1	1	2.44314	2.75627	18.747	2.44964	3.21209	1.98121
SRP1	Q02821	Importin subunit alpha OS=Saccharomyces cerevisiae (strain ATCC 204508 / S288c) GN=SRP1 PE=1 SV=1	1	1	3	3	8	7.13645	3540480	2381140	1799770	32457200	28145800	8704190	24314000	38071800	30209900	2.8774e+06	1.99464e+06	2.64362e+06	2.63784e+07	2.35773e+07	1.27853e+07	1.97603e+07	3.18921e+07	4.43743e+07	2.58297e+06	2.26079e+06	2.59827e+06	2.291e+07	2.3715e+07	1.97489e+07	2.56696e+07	2.8108e+07	2.87224e+07	1	1	1	8.86961	10.4897	7.60078	9.93802	12.4328	11.0544
DNM1	P54861	Dynamin-related protein DNM1 OS=Saccharomyces cerevisiae (strain ATCC 204508 / S288c) GN=DNM1 PE=1 SV=1	1	1	3	3	2	5.96651	1093990	747861	507346	3611900	3835300	2223110	2024190	5011650	3836960	1.0906e+06	613203	620684	3.60069e+06	3.14473e+06	2.71974e+06	2.01791e+06	4.10927e+06	4.69411e+06	979002	695022	610037	3.12724e+06	3.1631e+06	4.20107e+06	2.62136e+06	3.62168e+06	3.03838e+06	1	1	1	3.19432	4.55108	6.88658	2.67759	5.21089	4.98066
NOP2	P40991	25S rRNA (cytosine(2870)-C(5))-methyltransferase OS=Saccharomyces cerevisiae (strain ATCC 204508 / S288c) GN=NOP2 PE=1 SV=1	1	1	3	3	2	6.46084	556050	907158	401072	5188690	5707110	2102000	3248530	6938070	6459640	607779	633609	525354	5.67139e+06	3.98616e+06	2.75336e+06	3.55074e+06	4.84593e+06	8.46132e+06	545589	718151	516342	4.92567e+06	4.00945e+06	4.253e+06	4.61258e+06	4.27094e+06	5.47681e+06	1	1	1	9.02817	5.58302	8.23678	8.45432	5.94713	10.6069
SEC7	P11075	Protein transport protein SEC7 OS=Saccharomyces cerevisiae (strain ATCC 204508 / S288c) GN=SEC7 PE=1 SV=2	1	1	3	3	2	5.49783	611535	641153	674125	2384540	2271220	1296980	1358620	2989390	2649240	679124	547684	710632	2.64809e+06	1.94011e+06	1.36722e+06	1.50878e+06	2.55359e+06	2.79271e+06	609634	620761	698442	2.2999e+06	1.95145e+06	2.11188e+06	1.95998e+06	2.25059e+06	1.80765e+06	1	1	1	3.77259	3.14364	3.02371	3.21501	3.62554	2.58812
SCL1	P21243	Proteasome subunit alpha type-1 OS=Saccharomyces cerevisiae (strain ATCC 204508 / S288c) GN=SCL1 PE=1 SV=1	1	1	3	3	3	5.81822	1001380	824816	897010	3311170	3885420	2028870	2252700	3448770	4008030	1.04319e+06	754042	941878	3.44941e+06	3.55203e+06	2.13035e+06	2.34675e+06	3.15285e+06	4.20851e+06	936446	854654	925721	2.99586e+06	3.57279e+06	3.29067e+06	3.04855e+06	2.77875e+06	2.72407e+06	1	1	1	3.19918	4.18039	3.55471	3.25544	3.25132	2.94264
TSL1	P38427	Trehalose synthase complex regulatory subunit TSL1 OS=Saccharomyces cerevisiae (strain ATCC 204508 / S288c) GN=TSL1 PE=1 SV=1	1	1	3	3	4	5.91949	1296870	1191920	891214	5754920	5838250	3710660	4763190	6583830	7042300	1.27271e+06	1.07487e+06	1.00703e+06	5.6477e+06	5.2649e+06	4.19287e+06	4.67444e+06	5.93726e+06	7.95747e+06	1.14248e+06	1.21828e+06	989756	4.90509e+06	5.29566e+06	6.47656e+06	6.07234e+06	5.23278e+06	5.15068e+06	1	1	1	4.29337	4.34682	6.54359	5.31505	4.2952	5.20399
CTA1	P15202	Peroxisomal catalase A OS=Saccharomyces cerevisiae (strain ATCC 204508 / S288c) GN=CTA1 PE=1 SV=1	1	1	3	3	4	6.61409	1812820	1399490	984841	22849500	23392400	11225400	11854300	21928100	17202900	1.70181e+06	1.15757e+06	1.26834e+06	2.14502e+07	1.93487e+07	1.44567e+07	1.11284e+07	1.81375e+07	2.21549e+07	1.52767e+06	1.31202e+06	1.24658e+06	1.86298e+07	1.94617e+07	2.23307e+07	1.44563e+07	1.59854e+07	1.43403e+07	1	1	1	12.1949	14.8334	17.9136	9.46296	12.1838	11.5037
REC107	P21651	Recombination protein 107 OS=Saccharomyces cerevisiae (strain ATCC 204508 / S288c) GN=REC107 PE=1 SV=2	1	1	3	3	15	9.55705	38558400	46934400	33426000	416948000	352511000	186880000	544732000	856242000	772084000	3.80664e+07	3.94719e+07	4.02591e+07	4.11628e+08	2.96463e+08	2.25083e+08	5.37781e+08	7.20101e+08	9.29918e+08	3.41713e+07	4.47387e+07	3.95685e+07	3.57504e+08	2.98195e+08	3.47676e+08	6.98605e+08	6.34659e+08	6.01913e+08	1	1	1	10.4621	6.66526	8.78669	20.4442	14.1859	15.2119
MSD1	P15179	Aspartate--tRNA ligase, mitochondrial OS=Saccharomyces cerevisiae (strain ATCC 204508 / S288c) GN=MSD1 PE=1 SV=1	1	1	3	3	4	5.80819	1225800	1273150	978036	5223770	7251650	3974480	4264300	9224350	5907500	1.36443e+06	969940	1.15334e+06	5.81455e+06	5.52461e+06	4.68687e+06	4.74657e+06	7.0275e+06	6.96637e+06	1.22482e+06	1.09936e+06	1.13356e+06	5.05001e+06	5.5569e+06	7.23962e+06	6.16603e+06	6.19366e+06	4.50916e+06	1	1	1	4.12307	5.05467	6.38664	5.03424	5.63389	3.97789
MND1	P53102	Meiotic nuclear division protein 1 OS=Saccharomyces cerevisiae (strain ATCC 204508 / S288c) GN=MND1 PE=1 SV=2	1	1	3	3	2	6.10696	1590320	1502520	978813	13815600	13593900	5340200	5735580	16462900	10900900	1.62384e+06	1.10611e+06	1.30215e+06	1.41068e+07	1.00074e+07	7.10428e+06	5.85647e+06	1.21195e+07	1.45019e+07	1.45768e+06	1.2537e+06	1.27982e+06	1.22519e+07	1.00659e+07	1.09737e+07	7.60785e+06	1.06815e+07	9.38672e+06	1	1	1	8.40506	8.02897	8.57442	5.21914	8.51997	7.33443
YLR278C	Q05854	Uncharacterized transcriptional regulatory protein YLR278C OS=Saccharomyces cerevisiae (strain ATCC 204508 / S288c) GN=YLR278C PE=1 SV=1	1	1	3	3	2	5.54893	661492	797436	775676	3120580	3652580	1024710	2982140	4453160	3532160	658572	619274	1.00326e+06	3.10681e+06	2.83652e+06	1.32536e+06	2.96898e+06	3.45824e+06	4.56851e+06	591185	701903	986053	2.6983e+06	2.8531e+06	2.04723e+06	3.85685e+06	3.04791e+06	2.95708e+06	1	1	1	4.56422	4.06481	2.07619	6.52393	4.34235	2.99891
SYP1	P25623	Suppressor of yeast profilin deletion OS=Saccharomyces cerevisiae (strain ATCC 204508 / S288c) GN=SYP1 PE=1 SV=3	1	1	3	3	5	5.97748	3184300	3790440	2517540	9685800	10459700	4983440	7979900	13323600	12587100	3.29955e+06	3.04487e+06	3.02452e+06	1.00364e+07	8.40231e+06	5.98699e+06	8.26872e+06	1.07029e+07	1.51219e+07	2.96193e+06	3.45115e+06	2.97263e+06	8.7167e+06	8.45141e+06	9.24785e+06	1.07415e+07	9.43295e+06	9.78801e+06	1	1	1	2.94291	2.44887	3.111	3.62651	2.73328	3.29271
IMG1	P25626	54S ribosomal protein IMG1, mitochondrial OS=Saccharomyces cerevisiae (strain ATCC 204508 / S288c) GN=IMG1 PE=1 SV=1	1	1	3	3	2	5.60623	562542	557734	354973	4191160	5170200	1645050	2513190	4311340	2886420	531190	411381	509663	3.95757e+06	3.81351e+06	2.36193e+06	2.37312e+06	3.18002e+06	4.14427e+06	476837	466271	500921	3.4372e+06	3.83579e+06	3.64838e+06	3.0828e+06	2.8027e+06	2.68248e+06	1	1	1	7.20834	8.22652	7.28334	6.46511	6.01087	5.3551
POB3	Q04636	FACT complex subunit POB3 OS=Saccharomyces cerevisiae (strain ATCC 204508 / S288c) GN=POB3 PE=1 SV=1	1	1	3	3	7	6.93127	2734480	2960920	2293000	26638300	29766600	6042030	43126400	72752500	45942800	2.47896e+06	2.11607e+06	3.53921e+06	2.41492e+07	2.12731e+07	9.32578e+06	3.90966e+07	5.19936e+07	7.0912e+07	2.22531e+06	2.39841e+06	3.4785e+06	2.09738e+07	2.13974e+07	1.44051e+07	5.07884e+07	4.58244e+07	4.58996e+07	1	1	1	9.42513	8.92151	4.14119	22.8231	19.1062	13.1952
MCM4	P30665	DNA replication licensing factor MCM4 OS=Saccharomyces cerevisiae (strain ATCC 204508 / S288c) GN=MCM4 PE=1 SV=2	1	1	3	3	2	5.53034	655948	314701	420053	1740330	2015550	1289880	2123380	4545010	2838080	635733	287875	473798	1.6867e+06	1.84374e+06	1.45492e+06	2.05794e+06	4.15758e+06	3.2012e+06	570683	326286	465670	1.46492e+06	1.85451e+06	2.24735e+06	2.67337e+06	3.66427e+06	2.07206e+06	1	1	1	2.56695	5.6837	4.82605	4.68451	11.2302	4.44963
TES1	P41903	Peroxisomal acyl-coenzyme A thioester hydrolase 1 OS=Saccharomyces cerevisiae (strain ATCC 204508 / S288c) GN=TES1 PE=1 SV=1	1	1	3	3	4	6.27508	1985060	1983400	1314080	14081900	16034100	10415700	6700380	10112800	10401700	2.04468e+06	1.70608e+06	1.48314e+06	1.45049e+07	1.37922e+07	1.17557e+07	6.90163e+06	8.69881e+06	1.17399e+07	1.83547e+06	1.93372e+06	1.45769e+06	1.25977e+07	1.38728e+07	1.81585e+07	8.96557e+06	7.66666e+06	7.59893e+06	1	1	1	6.86346	7.17415	12.457	4.88463	3.96473	5.21298
GTS1	P40956	Protein GTS1 OS=Saccharomyces cerevisiae (strain ATCC 204508 / S288c) GN=GTS1 PE=1 SV=2	1	1	3	3	2	5.64607	667133	944506	524099	3038330	4557840	1318540	2736320	5347140	4996060	741330	653101	682086	3.37625e+06	3.15162e+06	1.71601e+06	3.04065e+06	3.6974e+06	6.5021e+06	665475	740243	670385	2.93231e+06	3.17004e+06	2.65064e+06	3.94995e+06	3.25869e+06	4.20865e+06	1	1	1	4.40634	4.28243	3.95391	5.93554	4.40219	6.27795
ARP8	Q12386	Actin-like protein ARP8 OS=Saccharomyces cerevisiae (strain ATCC 204508 / S288c) GN=ARP8 PE=1 SV=1	1	1	3	3	4	6.03831	1794410	1656260	1127440	10052900	13011600	2897220	9304040	20938800	13047200	1.7199e+06	1.14165e+06	1.7065e+06	9.63547e+06	8.96885e+06	4.38524e+06	8.91771e+06	1.4433e+07	1.97483e+07	1.54391e+06	1.29398e+06	1.67722e+06	8.36852e+06	9.02126e+06	6.7737e+06	1.15845e+07	1.27205e+07	1.27826e+07	1	1	1	5.42033	6.97169	4.03864	7.50336	9.83049	7.62127
DPS1	P04802	Aspartate--tRNA ligase, cytoplasmic OS=Saccharomyces cerevisiae (strain ATCC 204508 / S288c) GN=DPS1 PE=1 SV=3	1	1	3	3	23	7.08746	8697970	11116900	9064250	67686300	71321900	19582000	61093500	96804500	89450200	8.6404e+06	8.57769e+06	1.18258e+07	6.72383e+07	5.50313e+07	2.55478e+07	6.06892e+07	7.46934e+07	1.16702e+08	7.75629e+06	9.72221e+06	1.16229e+07	5.83973e+07	5.53528e+07	3.94627e+07	7.88383e+07	6.58307e+07	7.55384e+07	1	1	1	7.52902	5.69344	3.39525	10.1644	6.77117	6.4991
THS1	P04801	Threonine--tRNA ligase, cytoplasmic OS=Saccharomyces cerevisiae (strain ATCC 204508 / S288c) GN=THS1 PE=1 SV=2	1	1	3	3	14	7.17417	3598500	3323640	2512780	77382300	81375500	13416700	56063600	106950000	83486800	3.18576e+06	2.39565e+06	3.9378e+06	6.85066e+07	5.86547e+07	2.10255e+07	4.96332e+07	7.70886e+07	1.30833e+08	2.85978e+06	2.7153e+06	3.87025e+06	5.94988e+07	5.89975e+07	3.24771e+07	6.4476e+07	6.79417e+07	8.4685e+07	1	1	1	20.8054	21.7278	8.39147	22.5458	25.0218	21.881
COR1	P07256	Cytochrome b-c1 complex subunit 1, mitochondrial OS=Saccharomyces cerevisiae (strain ATCC 204508 / S288c) GN=COR1 PE=1 SV=1	1	1	3	3	8	6.79034	10154700	6243600	4572770	53296400	62540800	28032500	16495800	33276900	29239700	9.61387e+06	5.21593e+06	5.78165e+06	5.04579e+07	5.22468e+07	3.54433e+07	1.56172e+07	2.77997e+07	3.69696e+07	8.63015e+06	5.91189e+06	5.68247e+06	4.38233e+07	5.25521e+07	5.47478e+07	2.02876e+07	2.45011e+07	2.39295e+07	1	1	1	5.07793	8.88923	9.6345	2.35078	4.14438	4.21112
SUI2	P20459	Eukaryotic translation initiation factor 2 subunit alpha OS=Saccharomyces cerevisiae (strain ATCC 204508 / S288c) GN=SUI2 PE=1 SV=1	1	1	3	3	2	5.89293	480700	424745	208907	3999930	3660150	1595870	2855940	6164380	6039100	457434	335714	277753	3.80633e+06	2.89294e+06	2.12179e+06	2.71771e+06	4.87225e+06	8.02929e+06	410628	380508	272988	3.30584e+06	2.90984e+06	3.27744e+06	3.53044e+06	4.29414e+06	5.19717e+06	1	1	1	8.05071	7.64727	12.0058	8.59767	11.2853	19.0381
FAA1	P30624	Long-chain-fatty-acid--CoA ligase 1 OS=Saccharomyces cerevisiae (strain ATCC 204508 / S288c) GN=FAA1 PE=1 SV=1	1	1	3	3	9	6.60049	12223400	6390080	2980840	28408900	28650100	21353200	18894900	45054000	33012500	1.10481e+07	5.35152e+06	3.93796e+06	2.56774e+07	2.39937e+07	2.82095e+07	1.70781e+07	3.77315e+07	4.36125e+07	9.91763e+06	6.06557e+06	3.87041e+06	2.23011e+07	2.41339e+07	4.35741e+07	2.21854e+07	3.32545e+07	2.82293e+07	1	1	1	2.24863	3.97883	11.2583	2.23696	5.48251	7.29362
CLU1	Q03690	Clustered mitochondria protein 1 OS=Saccharomyces cerevisiae (strain ATCC 204508 / S288c) GN=CLU1 PE=1 SV=1	1	1	3	3	21	7.10819	9085270	7546460	7920020	138715000	138995000	34357900	87688000	219726000	129958000	8.68609e+06	5.64706e+06	1.10703e+07	1.3262e+08	1.04011e+08	4.80243e+07	8.38352e+07	1.64422e+08	1.81651e+08	7.7973e+06	6.40054e+06	1.08804e+07	1.15182e+08	1.04618e+08	7.41812e+07	1.08906e+08	1.44913e+08	1.17578e+08	1	1	1	14.7721	16.3453	6.81785	13.9672	22.6407	10.8064
STM1	P39015	Suppressor protein STM1 OS=Saccharomyces cerevisiae (strain ATCC 204508 / S288c) GN=STM1 PE=1 SV=3	1	1	3	3	9	8.05368	9823840	6859820	5895090	142235000	115140000	25038400	95832800	132418000	124571000	7.66562e+06	5.81234e+06	8.91633e+06	1.10987e+08	9.75583e+07	3.78706e+07	7.47791e+07	1.12198e+08	1.88414e+08	6.88125e+06	6.58788e+06	8.76338e+06	9.63937e+07	9.81284e+07	5.84971e+07	9.71418e+07	9.88853e+07	1.21956e+08	1	1	1	14.0082	14.8953	6.67518	14.1169	15.0102	13.9165
RPS0A	P32905	40S ribosomal protein S0-A OS=Saccharomyces cerevisiae (strain ATCC 204508 / S288c) GN=RPS0A PE=1 SV=3	1	1	3	3	4	6.76653	6060010	6095010	3485470	11890900	12970700	10305300	7389120	12834300	11887200	6.35235e+06	5.15338e+06	3.93262e+06	1.24645e+07	1.09668e+07	1.16274e+07	7.74558e+06	1.08515e+07	1.34122e+07	5.70236e+06	5.841e+06	3.86516e+06	1.08256e+07	1.10309e+07	1.79603e+07	1.00619e+07	9.56394e+06	8.6814e+06	1	1	1	1.89844	1.88853	4.64672	1.76451	1.63738	2.24606
PRP43	P53131	Pre-mRNA-splicing factor ATP-dependent RNA helicase PRP43 OS=Saccharomyces cerevisiae (strain ATCC 204508 / S288c) GN=PRP43 PE=1 SV=1	1	1	3	3	5	6.35077	1350040	1281360	1295760	16124400	14098600	4124330	9364110	12917600	11995000	1.20517e+06	1.09344e+06	1.70098e+06	1.43941e+07	1.2031e+07	5.41412e+06	8.35926e+06	1.10232e+07	1.57462e+07	1.08185e+06	1.23934e+06	1.6718e+06	1.25015e+07	1.21013e+07	8.36296e+06	1.08591e+07	9.71521e+06	1.01921e+07	1	1	1	11.5556	9.76429	5.00237	10.0375	7.83904	6.09648
RFC3	P38629	Replication factor C subunit 3 OS=Saccharomyces cerevisiae (strain ATCC 204508 / S288c) GN=RFC3 PE=1 SV=1	1	1	3	3	3	5.51521	784029	692288	432631	3380310	4008990	2196190	2200030	5240970	3665400	819554	533572	536989	3.53347e+06	3.08988e+06	2.72595e+06	2.29971e+06	4.03941e+06	4.54956e+06	735695	604767	527778	3.06886e+06	3.10794e+06	4.21066e+06	2.98744e+06	3.56012e+06	2.94482e+06	1	1	1	4.17138	5.13906	7.97809	4.06071	5.88677	5.57966
ADE2	P21264	Phosphoribosylaminoimidazole carboxylase OS=Saccharomyces cerevisiae (strain ATCC 204508 / S288c) GN=ADE2 PE=1 SV=1	1	1	3	3	2	6.1007	1207710	1145280	655877	8955510	6916170	3801440	5178860	6570040	8032500	1.06852e+06	1.03844e+06	817584	7.9234e+06	6.27096e+06	4.73869e+06	4.582e+06	5.95712e+06	1.00129e+07	959189	1.177e+06	803559	6.88157e+06	6.30761e+06	7.31965e+06	5.95225e+06	5.25029e+06	6.48112e+06	1	1	1	7.17436	5.35908	9.10904	6.20551	4.46075	8.06551
SAM1	P10659	S-adenosylmethionine synthase 1 OS=Saccharomyces cerevisiae (strain ATCC 204508 / S288c) GN=SAM1 PE=1 SV=2	1	1	3	3	2	6.39841	2532710	1092840	791520	7367830	6794080	4073770	4430800	7990990	6831940	2.10741e+06	1.01569e+06	1.02351e+06	6.13061e+06	6.31443e+06	5.26779e+06	3.68677e+06	7.42685e+06	8.83438e+06	1.89178e+06	1.15121e+06	1.00596e+06	5.32451e+06	6.35133e+06	8.13694e+06	4.7893e+06	6.54562e+06	5.71828e+06	1	1	1	2.81456	5.51709	8.08875	2.53164	5.68586	5.68442
RLI1	Q03195	Translation initiation factor RLI1 OS=Saccharomyces cerevisiae (strain ATCC 204508 / S288c) GN=RLI1 PE=1 SV=1	1	1	3	3	3	6.0558	1708680	1677910	1157620	8568940	10486200	5390560	7260110	13988700	10054200	1.76902e+06	1.3131e+06	1.42878e+06	8.87155e+06	8.20627e+06	6.65325e+06	7.51649e+06	1.09473e+07	1.24093e+07	1.58801e+06	1.4883e+06	1.40427e+06	7.70504e+06	8.25423e+06	1.0277e+07	9.7643e+06	9.64832e+06	8.03224e+06	1	1	1	4.85201	5.54607	7.31838	6.14877	6.48277	5.71986
TPI1	P00942	Triosephosphate isomerase OS=Saccharomyces cerevisiae (strain ATCC 204508 / S288c) GN=TPI1 PE=1 SV=2	1	1	3	3	3	6.10107	3093430	3815630	3562330	6972800	7406430	5779840	5544360	6049430	7623250	3.31745e+06	3.63246e+06	3.48927e+06	7.47777e+06	7.05088e+06	5.66131e+06	5.94588e+06	5.75902e+06	7.46691e+06	2.978e+06	4.11714e+06	3.42942e+06	6.49453e+06	7.09208e+06	8.74478e+06	7.72399e+06	5.07569e+06	4.83315e+06	1	1	1	2.18083	1.72258	2.54993	2.59368	1.23282	1.40932
FLC2	P39719	Flavin carrier protein 2 OS=Saccharomyces cerevisiae (strain ATCC 204508 / S288c) GN=FLC2 PE=1 SV=2	1	1	3	3	2	5.47826	3076960	2440840	1826640	639503	884073	553959	669851	922583	929545	3.10269e+06	2.14516e+06	2.06118e+06	644851	776977	625088	675452	810821	1.0489e+06	2.78521e+06	2.43138e+06	2.02583e+06	560060	781517	965548	877446	714614	678927	1	1	1	0.201084	0.321429	0.476619	0.315037	0.293913	0.335136
BDH1	P39714	(R,R)-butanediol dehydrogenase OS=Saccharomyces cerevisiae (strain ATCC 204508 / S288c) GN=BDH1 PE=1 SV=2	1	1	3	3	2	6.63961	1766890	1386890	1528180	8854590	7637550	3408730	3992420	6390090	6539580	1.6666e+06	1.2736e+06	1.76426e+06	8.35199e+06	7.01368e+06	3.93532e+06	3.7658e+06	5.86812e+06	7.54983e+06	1.49607e+06	1.44354e+06	1.73399e+06	7.2538e+06	7.05466e+06	6.07872e+06	4.89197e+06	5.17184e+06	4.88682e+06	1	1	1	4.84858	4.88706	3.50562	3.26989	3.58275	2.81825
DIS3	Q08162	Exosome complex exonuclease DIS3 OS=Saccharomyces cerevisiae (strain ATCC 204508 / S288c) GN=DIS3 PE=1 SV=1	1	1	3	3	2	5.74604	1467490	1346080	480270	3881400	2888770	1203310	1716490	3216250	2722580	1.23113e+06	1.0403e+06	740745	3.25625e+06	2.23254e+06	1.85593e+06	1.44003e+06	2.48563e+06	4.19918e+06	1.10516e+06	1.1791e+06	728039	2.82809e+06	2.24559e+06	2.86677e+06	1.87067e+06	2.1907e+06	2.71802e+06	1	1	1	2.55899	1.90449	3.93767	1.69267	1.85794	3.73335
SAC6	P32599	Fimbrin OS=Saccharomyces cerevisiae (strain ATCC 204508 / S288c) GN=SAC6 PE=1 SV=1	1	1	3	3	2	5.77787	506572	628667	299649	2803060	2127450	1021780	1482870	2397200	2997680	484018	522122	377607	2.67826e+06	1.7669e+06	1.28761e+06	1.41685e+06	1.99093e+06	3.77757e+06	434492	591789	371130	2.3261e+06	1.77722e+06	1.98892e+06	1.84056e+06	1.7547e+06	2.44513e+06	1	1	1	5.35361	3.00313	5.35909	4.23611	2.96507	6.58834
STH1	P32597	Nuclear protein STH1/NPS1 OS=Saccharomyces cerevisiae (strain ATCC 204508 / S288c) GN=STH1 PE=1 SV=1	1	1	3	3	9	6.07902	5506550	5086580	4156450	21262400	20037200	8080040	12329500	20292800	19422400	5.24685e+06	4.29921e+06	5.16108e+06	2.02596e+07	1.69356e+07	1.0033e+07	1.1748e+07	1.71516e+07	2.41169e+07	4.70997e+06	4.87285e+06	5.07255e+06	1.75957e+07	1.70345e+07	1.54976e+07	1.52613e+07	1.51165e+07	1.56103e+07	1	1	1	3.73584	3.4958	3.05519	3.2402	3.10219	3.0774
RPL14A|RPL14B	P36105|P38754	60S ribosomal protein L14-A OS=Saccharomyces cerevisiae (strain ATCC 204508 / S288c) GN=RPL14A PE=1 SV=1|60S ribosomal protein L14-B OS=Saccharomyces cerevisiae (strain ATCC 204508 / S288c) GN=RPL14B PE=1 SV=1	1	1	3	3	7	8.14976	7916980	8229200	7729880	153619000	188673000	61609400	80238000	101965000	107130000	7.77343e+06	6.87648e+06	9.4213e+06	1.50834e+08	1.57659e+08	7.50905e+07	7.87832e+07	8.5204e+07	1.30572e+08	6.97803e+06	7.79401e+06	9.25968e+06	1.31001e+08	1.5858e+08	1.15989e+08	1.02343e+08	7.50942e+07	8.45159e+07	1	1	1	18.7733	20.3464	12.5263	14.6665	9.63486	9.12729
MSS116	P15424	ATP-dependent RNA helicase MSS116, mitochondrial OS=Saccharomyces cerevisiae (strain ATCC 204508 / S288c) GN=MSS116 PE=1 SV=1	1	1	3	3	14	7.34274	6354710	7443520	5552920	72699900	78161800	14280700	57251700	93666800	76296600	5.84515e+06	5.38061e+06	8.35158e+06	6.68704e+07	5.64999e+07	2.14781e+07	5.26609e+07	6.77078e+07	1.1475e+08	5.24706e+06	6.09854e+06	8.20832e+06	5.80777e+07	5.683e+07	3.31764e+07	6.84091e+07	5.9674e+07	7.42748e+07	1	1	1	11.0686	9.31863	4.0418	13.0376	9.78497	9.04873
SPO14	P36126	Phospholipase D1 OS=Saccharomyces cerevisiae (strain ATCC 204508 / S288c) GN=SPO14 PE=1 SV=3	1	1	3	3	5	6.25363	3366290	3532630	3284010	34160500	36389700	8507670	4893650	7392690	8098320	3.22456e+06	2.84158e+06	4.26209e+06	3.27223e+07	2.92712e+07	1.10415e+07	4.68762e+06	5.94655e+06	1.05103e+07	2.89461e+06	3.22073e+06	4.18898e+06	2.84197e+07	2.94423e+07	1.70554e+07	6.08945e+06	5.24096e+06	6.80304e+06	1	1	1	9.81812	9.14147	4.07149	2.10372	1.62726	1.62403
VAC8	P39968	Vacuolar protein 8 OS=Saccharomyces cerevisiae (strain ATCC 204508 / S288c) GN=VAC8 PE=1 SV=3	1	1	3	3	2	5.91338	1484730	993183	1304400	4758960	4119930	2323830	4422200	7555210	6374480	1.40585e+06	943769	1.44971e+06	4.50614e+06	3.91495e+06	2.58271e+06	4.18727e+06	7.17931e+06	7.08462e+06	1.262e+06	1.0697e+06	1.42485e+06	3.91363e+06	3.93783e+06	3.98941e+06	5.43947e+06	6.32746e+06	4.5857e+06	1	1	1	3.10113	3.68126	2.79989	4.31019	5.9152	3.21838
MRPL32	P25348	54S ribosomal protein L32, mitochondrial OS=Saccharomyces cerevisiae (strain ATCC 204508 / S288c) GN=MRPL32 PE=1 SV=1	1	1	3	3	2	6.09913	184344	537251	309135	3176940	2973830	1174780	2123500	3896470	3286130	219462	373895	373117	3.78216e+06	2.06961e+06	1.41793e+06	2.52803e+06	2.71171e+06	3.96627e+06	197006	423783	366717	3.28485e+06	2.0817e+06	2.19021e+06	3.28404e+06	2.38996e+06	2.56727e+06	1	1	1	16.6738	4.91219	5.97249	16.6697	5.63957	7.00068
CDC10	P25342	Cell division control protein 10 OS=Saccharomyces cerevisiae (strain ATCC 204508 / S288c) GN=CDC10 PE=1 SV=1	1	1	3	3	4	6.66454	3887610	1052680	997562	14352600	13957400	3620230	9809140	22578400	14698200	2.83748e+06	907882	1.58474e+06	1.04756e+07	1.20375e+07	5.75114e+06	7.15946e+06	1.94727e+07	2.33497e+07	2.54714e+06	1.02902e+06	1.55755e+06	9.09821e+06	1.21079e+07	8.88354e+06	9.3005e+06	1.71622e+07	1.51137e+07	1	1	1	3.57194	11.7664	5.70352	3.65135	16.6782	9.70349
RVS161	P25343	Reduced viability upon starvation protein 161 OS=Saccharomyces cerevisiae (strain ATCC 204508 / S288c) GN=RVS161 PE=1 SV=1	1	1	3	3	4	6.03673	3369730	1446180	932525	6159910	8382970	3474210	5557800	8303610	7203110	2.7791e+06	1.24813e+06	1.31013e+06	5.08023e+06	7.23494e+06	4.88101e+06	4.58365e+06	7.16645e+06	1.01199e+07	2.49473e+06	1.41467e+06	1.28766e+06	4.41224e+06	7.27722e+06	7.5395e+06	5.95439e+06	6.31612e+06	6.55033e+06	1	1	1	1.76862	5.14412	5.85521	2.38679	4.46474	5.08702
ADY3	Q07732	Accumulates dyads protein 3 OS=Saccharomyces cerevisiae (strain ATCC 204508 / S288c) GN=ADY3 PE=1 SV=2	1	1	3	3	2	5.91835	371647	110038	374656	3615920	4081260	1383070	1000080	4328700	2083470	377897	98934.8	409810	3.67673e+06	3.66945e+06	1.51284e+06	1.0169e+06	3.89192e+06	2.27896e+06	339230	112136	402780	3.19329e+06	3.69089e+06	2.33683e+06	1.321e+06	3.43013e+06	1.47512e+06	1	1	1	9.41334	32.9145	5.80174	3.89413	30.5891	3.66234
NIC96	P34077	Nucleoporin NIC96 OS=Saccharomyces cerevisiae (strain ATCC 204508 / S288c) GN=NIC96 PE=1 SV=2	1	1	3	3	5	5.84957	2837900	2523580	2060700	7948120	9190290	4429940	6804790	12870200	9555640	2.86962e+06	2.04437e+06	2.51561e+06	8.03697e+06	7.44513e+06	5.40788e+06	6.88086e+06	1.04262e+07	1.16651e+07	2.576e+06	2.31715e+06	2.47246e+06	6.98021e+06	7.48863e+06	8.35333e+06	8.93858e+06	9.18913e+06	7.55054e+06	1	1	1	2.70971	3.23183	3.37855	3.46995	3.9657	3.05386
SPT5	P27692	Transcription elongation factor SPT5 OS=Saccharomyces cerevisiae (strain ATCC 204508 / S288c) GN=SPT5 PE=1 SV=1	1	1	3	3	18	6.73568	6691880	9433960	6242830	43955500	51597500	18740100	69677700	100362000	62789200	6.57583e+06	6.93986e+06	8.6362e+06	4.31932e+07	3.79564e+07	2.59247e+07	6.84693e+07	7.38288e+07	8.68613e+07	5.90297e+06	7.86584e+06	8.48805e+06	3.75138e+07	3.81782e+07	4.00447e+07	8.89451e+07	6.50687e+07	5.62232e+07	1	1	1	6.35508	4.85367	4.71778	15.0679	8.27232	6.6238
MRPL25	P23369	54S ribosomal protein L25, mitochondrial OS=Saccharomyces cerevisiae (strain ATCC 204508 / S288c) GN=MRPL25 PE=1 SV=2	1	1	3	3	2	5.72661	2328250	2256650	1284560	5165320	5918560	4628020	3736770	3310520	4163070	2.17501e+06	2.11956e+06	1.464e+06	4.82536e+06	5.55901e+06	5.2745e+06	3.49083e+06	3.10941e+06	4.7446e+06	1.95246e+06	2.40237e+06	1.43888e+06	4.19088e+06	5.59149e+06	8.1473e+06	4.53477e+06	2.74046e+06	3.07106e+06	1	1	1	2.14646	2.32749	5.66223	2.32259	1.14073	2.13434
NSR1	P27476	Nuclear localization sequence-binding protein OS=Saccharomyces cerevisiae (strain ATCC 204508 / S288c) GN=NSR1 PE=1 SV=1	1	1	3	3	11	7.31068	7488130	4933510	3092640	145240000	124508000	32523400	48820700	63492000	67417100	5.75676e+06	4.20363e+06	4.72125e+06	1.11658e+08	1.06088e+08	4.96504e+07	3.75326e+07	5.40988e+07	1.02919e+08	5.16771e+06	4.76452e+06	4.64026e+06	9.69765e+07	1.06708e+08	7.6693e+07	4.87567e+07	4.76797e+07	6.66172e+07	1	1	1	18.7659	22.3963	16.5277	9.43488	10.0073	14.3564
SSB1|SSB2	P11484|P40150	Heat shock protein SSB1 OS=Saccharomyces cerevisiae (strain ATCC 204508 / S288c) GN=SSB1 PE=1 SV=3|Heat shock protein SSB2 OS=Saccharomyces cerevisiae (strain ATCC 204508 / S288c) GN=SSB2 PE=1 SV=2	1	1	3	3	13	7.6812	10223900	9477180	5607810	56538000	51663600	25470300	50100000	90400300	75850200	9.6082e+06	7.73199e+06	7.31401e+06	5.31332e+07	4.21499e+07	3.32197e+07	4.70829e+07	7.37534e+07	9.89279e+07	8.62506e+06	8.76367e+06	7.18855e+06	4.61468e+07	4.23962e+07	5.13131e+07	6.1163e+07	6.50023e+07	6.40336e+07	1	1	1	5.35032	4.83773	7.13818	7.09132	7.41725	8.90773
IES2	P40154	Ino eighty subunit 2 OS=Saccharomyces cerevisiae (strain ATCC 204508 / S288c) GN=IES2 PE=1 SV=1	1	1	3	3	2	5.72904	862918	1072330	598313	3696070	4002510	1488560	3331070	6403310	5338470	877072	793969	795038	3.75669e+06	2.96352e+06	1.978e+06	3.38571e+06	4.7411e+06	7.09376e+06	787327	899907	781400	3.26273e+06	2.98083e+06	3.05533e+06	4.3982e+06	4.17855e+06	4.59162e+06	1	1	1	4.14406	3.31238	3.91007	5.58625	4.64331	5.87614
VID27	P40157	Vacuolar import and degradation protein 27 OS=Saccharomyces cerevisiae (strain ATCC 204508 / S288c) GN=VID27 PE=1 SV=1	1	1	3	3	2	5.47293	697964	1087000	719214	2195400	2661680	1567180	1501250	2780700	2216270	809518	830570	811555	2.54628e+06	2.03377e+06	1.76839e+06	1.74119e+06	2.12472e+06	2.50082e+06	726685	941392	797634	2.21148e+06	2.04566e+06	2.73156e+06	2.26189e+06	1.87261e+06	1.61872e+06	1	1	1	3.04324	2.17301	3.42458	3.11262	1.98919	2.0294
TRA1	P38811	Transcription-associated protein 1 OS=Saccharomyces cerevisiae (strain ATCC 204508 / S288c) GN=TRA1 PE=1 SV=1	1	1	3	3	18	6.68343	3767830	4178220	6613460	32989500	37854200	18786600	41328200	55760200	47641800	4.06453e+06	3.76419e+06	6.80503e+06	3.55872e+07	3.41031e+07	1.93308e+07	4.45826e+07	5.02347e+07	4.90218e+07	3.64863e+06	4.26644e+06	6.6883e+06	3.0908e+07	3.43024e+07	2.98595e+07	5.7915e+07	4.42742e+07	3.17306e+07	1	1	1	8.47111	8.04005	4.46443	15.8731	10.3773	4.7442
MAK21	Q12176	Ribosome biogenesis protein MAK21 OS=Saccharomyces cerevisiae (strain ATCC 204508 / S288c) GN=MAK21 PE=1 SV=1	1	1	3	3	4	5.83667	1921670	1494310	1776480	10303200	13348200	4605210	6214770	10363300	9692840	1.93869e+06	1.26816e+06	2.07489e+06	1.03945e+07	1.13281e+07	5.37879e+06	6.26982e+06	8.79494e+06	1.1321e+07	1.74032e+06	1.43737e+06	2.0393e+06	9.02772e+06	1.13943e+07	8.30839e+06	8.14481e+06	7.75139e+06	7.32783e+06	1	1	1	5.18739	7.92717	4.07414	4.68007	5.39274	3.59331
FUN12	P39730	Eukaryotic translation initiation factor 5B OS=Saccharomyces cerevisiae (strain ATCC 204508 / S288c) GN=FUN12 PE=1 SV=2	1	1	3	3	9	6.71847	9569370	4755300	3482160	42024600	38895500	9719520	38215300	55847600	53856700	7.22496e+06	4.09868e+06	5.35095e+06	3.17289e+07	3.35247e+07	1.49357e+07	2.88529e+07	4.81361e+07	8.27603e+07	6.48568e+06	4.64556e+06	5.25916e+06	2.7557e+07	3.37206e+07	2.30706e+07	3.74813e+07	4.24245e+07	5.35687e+07	1	1	1	4.2489	7.25868	4.38675	5.77909	9.13227	10.1858
INO1	P11986	Inositol-3-phosphate synthase OS=Saccharomyces cerevisiae (strain ATCC 204508 / S288c) GN=INO1 PE=1 SV=3	1	1	3	3	3	5.83791	1550290	984185	977837	8842980	6689250	3049230	3891570	11434600	7258920	1.45712e+06	824730	1.24151e+06	8.31151e+06	5.60547e+06	3.87145e+06	3.65768e+06	9.582e+06	9.21628e+06	1.30802e+06	934773	1.22021e+06	7.21865e+06	5.63823e+06	5.98007e+06	4.75151e+06	8.44505e+06	5.96547e+06	1	1	1	5.51876	6.03166	4.90084	3.6326	9.03434	4.88888
RPB2	P08518	DNA-directed RNA polymerase II subunit RPB2 OS=Saccharomyces cerevisiae (strain ATCC 204508 / S288c) GN=RPB2 PE=1 SV=2	1	1	3	3	20	7.18273	13190100	11356000	11627800	69437400	79909500	21310700	158361000	178001000	115624000	1.11476e+07	9.25922e+06	1.68738e+07	5.86851e+07	6.51549e+07	3.09253e+07	1.33839e+08	1.45135e+08	1.67789e+08	1.0007e+07	1.04947e+07	1.65844e+07	5.09687e+07	6.55357e+07	4.77691e+07	1.73864e+08	1.27914e+08	1.08606e+08	1	1	1	5.09332	6.24466	2.88036	17.3742	12.1885	6.54868
HIS3	P06633	Imidazoleglycerol-phosphate dehydratase OS=Saccharomyces cerevisiae (strain ATCC 204508 / S288c) GN=HIS3 PE=1 SV=2	1	1	3	3	2	8.20604	925171	512864	227664	83616100	42490100	11944100	21510600	37917500	33796900	620412	434316	400897	5.60723e+07	3.59825e+07	2.10325e+07	1.44248e+07	3.21102e+07	5.95135e+07	556930	492266	394020	4.86995e+07	3.61927e+07	3.24881e+07	1.87386e+07	2.83002e+07	3.85216e+07	1	1	1	87.4427	73.5227	82.4529	33.6462	57.4896	97.7656
PSA1	P41940	Mannose-1-phosphate guanyltransferase OS=Saccharomyces cerevisiae (strain ATCC 204508 / S288c) GN=PSA1 PE=1 SV=2	1	1	3	3	4	6.58721	5103270	6457360	3474500	32340000	29087100	14666500	18098500	25701500	28989000	4.9778e+06	5.36723e+06	4.28556e+06	3.15449e+07	2.41766e+07	1.80901e+07	1.76535e+07	2.13626e+07	3.5756e+07	4.46846e+06	6.08337e+06	4.21205e+06	2.73971e+07	2.43179e+07	2.79431e+07	2.29328e+07	1.88278e+07	2.3144e+07	1	1	1	6.13122	3.99743	6.63408	5.13216	3.09496	5.49471
CKA2	P19454	Casein kinase II subunit alpha' OS=Saccharomyces cerevisiae (strain ATCC 204508 / S288c) GN=CKA2 PE=1 SV=2	1	1	3	3	4	7.02722	2569460	2480490	1816300	11624600	14336500	5738610	6122840	10083900	9515900	2.58708e+06	1.99538e+06	2.24249e+06	1.17043e+07	1.15327e+07	7.08517e+06	6.16482e+06	8.1118e+06	1.17488e+07	2.32236e+06	2.26163e+06	2.20403e+06	1.01653e+07	1.16001e+07	1.09442e+07	8.00841e+06	7.1493e+06	7.60471e+06	1	1	1	4.37715	5.1291	4.96553	3.44839	3.16114	3.45037
PYC1	P11154	Pyruvate carboxylase 1 OS=Saccharomyces cerevisiae (strain ATCC 204508 / S288c) GN=PYC1 PE=1 SV=2	1	1	3	3	12	6.64887	8229390	6155550	5357490	35641600	29017800	18589600	25280300	36068400	39905200	7.55945e+06	5.92569e+06	6.05852e+06	3.27401e+07	2.79342e+07	2.1022e+07	2.32223e+07	3.47216e+07	4.51268e+07	6.78595e+06	6.71636e+06	5.95459e+06	2.84352e+07	2.80975e+07	3.24719e+07	3.01669e+07	3.06017e+07	2.92095e+07	1	1	1	4.1903	4.18344	5.45325	4.4455	4.5563	4.90537
NOP58	Q12499	Nucleolar protein 58 OS=Saccharomyces cerevisiae (strain ATCC 204508 / S288c) GN=NOP58 PE=1 SV=1	1	1	3	3	11	7.38254	10622700	12880100	11491100	79871600	71992300	19018400	55499100	82342700	74830000	9.96611e+06	1.02858e+07	1.53374e+07	7.49347e+07	5.74916e+07	2.53843e+07	5.20687e+07	6.57572e+07	9.98773e+07	8.94634e+06	1.16582e+07	1.50743e+07	6.50817e+07	5.78275e+07	3.92101e+07	6.76398e+07	5.79548e+07	6.46482e+07	1	1	1	7.27467	4.96024	2.60111	7.56061	4.97116	4.28862
RSP5	P39940	E3 ubiquitin-protein ligase RSP5 OS=Saccharomyces cerevisiae (strain ATCC 204508 / S288c) GN=RSP5 PE=1 SV=1	1	1	3	3	3	5.88234	1352700	1224800	821133	6755480	8449460	2096400	5355130	11074000	8339420	1.29744e+06	884627	1.18531e+06	6.4795e+06	6.10273e+06	3.02618e+06	5.13636e+06	7.99833e+06	1.2038e+07	1.16468e+06	1.00266e+06	1.16498e+06	5.62752e+06	6.13839e+06	4.67441e+06	6.67238e+06	7.0493e+06	7.79193e+06	1	1	1	4.83182	6.12209	4.01243	5.72894	7.03058	6.68846
UBP7	P40453	Ubiquitin carboxyl-terminal hydrolase 7 OS=Saccharomyces cerevisiae (strain ATCC 204508 / S288c) GN=UBP7 PE=1 SV=1	1	1	3	3	3	5.74179	1266480	1752960	1115270	8109780	7436840	2990860	2088870	4228890	4201790	1.34151e+06	1.35564e+06	1.36148e+06	8.59023e+06	5.75124e+06	3.65113e+06	2.21262e+06	3.27039e+06	5.12939e+06	1.20424e+06	1.53652e+06	1.33813e+06	7.46071e+06	5.78484e+06	5.63975e+06	2.8743e+06	2.88234e+06	3.32013e+06	1	1	1	6.19536	3.76489	4.21466	2.38682	1.87589	2.48118
ASC1	P38011	Guanine nucleotide-binding protein subunit beta-like protein OS=Saccharomyces cerevisiae (strain ATCC 204508 / S288c) GN=ASC1 PE=1 SV=4	1	1	3	3	3	6.77331	2222250	1830330	1389670	15532000	10746600	6302260	9791890	13085300	17863400	1.97916e+06	1.78505e+06	1.59994e+06	1.38329e+07	1.04807e+07	7.25585e+06	8.72074e+06	1.27616e+07	2.05663e+07	1.77664e+06	2.02323e+06	1.57249e+06	1.20141e+07	1.0542e+07	1.12078e+07	1.13287e+07	1.12474e+07	1.33121e+07	1	1	1	6.76223	5.21048	7.12741	6.37646	5.55912	8.46557
HSP104	P31539	Heat shock protein 104 OS=Saccharomyces cerevisiae (strain ATCC 204508 / S288c) GN=HSP104 PE=1 SV=2	1	1	3	3	9	6.24771	3488150	3111750	2316120	13091900	11232500	5654450	8546100	18738200	15294300	3.43076e+06	2.57545e+06	2.84523e+06	1.28765e+07	9.2966e+06	6.9462e+06	8.4055e+06	1.55087e+07	1.87883e+07	3.07972e+06	2.91909e+06	2.79643e+06	1.11834e+07	9.35092e+06	1.07295e+07	1.09192e+07	1.36685e+07	1.21612e+07	1	1	1	3.63131	3.20337	3.83686	3.54551	4.68247	4.34883
ISW2	Q08773	ISWI chromatin-remodeling complex ATPase ISW2 OS=Saccharomyces cerevisiae (strain ATCC 204508 / S288c) GN=ISW2 PE=1 SV=1	1	1	3	3	4	5.74283	824206	1040490	754217	5360390	5847420	1888090	3911550	8054820	6013340	855954	763414	989828	5.56687e+06	4.29029e+06	2.47791e+06	4.06222e+06	5.90987e+06	7.89185e+06	768370	865276	972848	4.83489e+06	4.31536e+06	3.82753e+06	5.27703e+06	5.20864e+06	5.1082e+06	1	1	1	6.2924	4.98726	3.93435	6.86782	6.01963	5.25077
RSM23	Q01163	37S ribosomal protein S23, mitochondrial OS=Saccharomyces cerevisiae (strain ATCC 204508 / S288c) GN=RSM23 PE=1 SV=3	1	1	3	3	4	6.29498	1475160	1460440	1371520	24200700	21674200	9127490	8988590	13093000	12803300	1.40503e+06	1.27731e+06	1.64643e+06	2.30502e+07	1.89563e+07	1.0957e+07	8.56128e+06	1.14512e+07	1.53696e+07	1.26126e+06	1.44774e+06	1.61819e+06	2.00194e+07	1.90671e+07	1.69249e+07	1.11215e+07	1.00925e+07	9.94839e+06	1	1	1	15.8725	13.1703	10.4591	8.81776	6.9712	6.14785
PRB1	P09232	Cerevisin OS=Saccharomyces cerevisiae (strain ATCC 204508 / S288c) GN=PRB1 PE=1 SV=1	1	1	3	3	5	6.27062	3208670	2056180	2183300	12908800	11062100	6512460	6736960	11903900	11184900	3.00427e+06	1.94463e+06	2.4656e+06	1.20865e+07	1.0462e+07	7.35452e+06	6.30781e+06	1.12581e+07	1.26311e+07	2.69687e+06	2.2041e+06	2.4233e+06	1.04973e+07	1.05231e+07	1.13602e+07	8.19415e+06	9.9223e+06	8.1758e+06	1	1	1	3.89239	4.77433	4.6879	3.0384	4.50174	3.37382
HEF3	P53978	Elongation factor 3B OS=Saccharomyces cerevisiae (strain ATCC 204508 / S288c) GN=HEF3 PE=1 SV=2	1	1	3	3	2	5.78496	1084070	725881	505829	2914520	2837270	2077110	1512340	4461010	3193010	1.12082e+06	603536	588419	3.01333e+06	2.35906e+06	2.41625e+06	1.56361e+06	3.70912e+06	3.71435e+06	1.00614e+06	684065	578325	2.61711e+06	2.37284e+06	3.73228e+06	2.03121e+06	3.26902e+06	2.40421e+06	1	1	1	2.60115	3.46874	6.45361	2.01882	4.77881	4.15719
JIP5	Q06214	WD repeat-containing protein JIP5 OS=Saccharomyces cerevisiae (strain ATCC 204508 / S288c) GN=JIP5 PE=1 SV=2	1	1	3	3	3	5.95993	1001240	1440630	690826	6782170	7904390	1706950	4929190	7322840	6236530	936390	993875	1.07071e+06	6.34289e+06	5.45315e+06	2.64559e+06	4.60993e+06	5.05195e+06	9.66596e+06	840576	1.12649e+06	1.05234e+06	5.50888e+06	5.48502e+06	4.08653e+06	5.98853e+06	4.45251e+06	6.25654e+06	1	1	1	6.5537	4.86914	3.88328	7.12432	3.95257	5.94536
HYP2	P23301	Eukaryotic translation initiation factor 5A-1 OS=Saccharomyces cerevisiae (strain ATCC 204508 / S288c) GN=HYP2 PE=1 SV=3	1	1	3	3	3	5.87211	1754770	1039170	996662	3312000	4089510	1925330	2232630	4544880	3459310	1.70244e+06	882987	1.20901e+06	3.21323e+06	3.47487e+06	2.33553e+06	2.16605e+06	3.8618e+06	4.19633e+06	1.52824e+06	1.0008e+06	1.18827e+06	2.79073e+06	3.49518e+06	3.6076e+06	2.81381e+06	3.40358e+06	2.71618e+06	1	1	1	1.82611	3.49237	3.03602	1.84121	3.40085	2.28584
TFC1	P32367	Transcription factor tau 95 kDa subunit OS=Saccharomyces cerevisiae (strain ATCC 204508 / S288c) GN=TFC1 PE=1 SV=1	1	1	3	3	4	6.03762	826135	1137410	926434	10950000	11286100	2543140	11092200	17767600	13909800	799239	836900	1.30146e+06	1.05935e+07	8.30425e+06	3.57263e+06	1.07311e+07	1.30733e+07	1.95406e+07	717458	948567	1.27914e+06	9.20059e+06	8.35278e+06	5.51849e+06	1.39402e+07	1.15221e+07	1.26482e+07	1	1	1	12.8239	8.80568	4.31422	19.43	12.1469	9.88804
YRA1	Q12159	RNA annealing protein YRA1 OS=Saccharomyces cerevisiae (strain ATCC 204508 / S288c) GN=YRA1 PE=1 SV=2	1	1	3	3	9	7.93302	4571220	3445960	3857700	74739300	66732200	28669400	72794900	91968600	103235000	4.11759e+06	3.27632e+06	4.50445e+06	6.73224e+07	6.34471e+07	3.34759e+07	6.5571e+07	8.74411e+07	1.20543e+08	3.69626e+06	3.71348e+06	4.42718e+06	5.84703e+07	6.38178e+07	5.17088e+07	8.518e+07	7.70659e+07	7.80242e+07	1	1	1	15.8188	17.1855	11.6798	23.0449	20.753	17.6239
CDS1	P38221	Phosphatidate cytidylyltransferase OS=Saccharomyces cerevisiae (strain ATCC 204508 / S288c) GN=CDS1 PE=1 SV=1	1	1	3	3	2	5.79281	401247	1394950	132166	2023700	2255090	1053030	1715030	2994280	2402560	423458	778447	224414	2.13572e+06	1.25845e+06	1.78802e+06	1.80997e+06	1.67095e+06	4.07948e+06	380129	882315	220565	1.8549e+06	1.2658e+06	2.76187e+06	2.35124e+06	1.47268e+06	2.64055e+06	1	1	1	4.87967	1.43463	12.5218	6.18537	1.66911	11.9718
GLK1	P17709	Glucokinase-1 OS=Saccharomyces cerevisiae (strain ATCC 204508 / S288c) GN=GLK1 PE=1 SV=1	1	1	3	3	4	6.56212	14600800	6219410	4008320	50022500	37898900	15547800	25789300	35843800	42819000	1.07495e+07	5.98169e+06	5.6608e+06	3.68278e+07	3.64503e+07	2.19576e+07	1.89867e+07	3.44737e+07	6.04716e+07	9.64955e+06	6.77982e+06	5.56369e+06	3.19854e+07	3.66633e+07	3.39169e+07	2.46647e+07	3.03833e+07	3.91418e+07	1	1	1	3.3147	5.40771	6.09612	2.55605	4.48143	7.03522
SDH1	Q00711	Succinate dehydrogenase [ubiquinone] flavoprotein subunit, mitochondrial OS=Saccharomyces cerevisiae (strain ATCC 204508 / S288c) GN=SDH1 PE=1 SV=1	1	1	3	3	11	7.12895	10864700	18817900	22287700	88298800	82250000	39438500	48510100	81999900	98066200	1.30069e+07	1.61246e+07	2.17265e+07	1.05709e+08	7.04782e+07	3.84454e+07	5.8075e+07	7.02639e+07	9.55968e+07	1.1676e+07	1.82761e+07	2.13538e+07	9.18096e+07	7.089e+07	5.9385e+07	7.54424e+07	6.19268e+07	6.18774e+07	1	1	1	7.86308	3.87883	2.78101	6.4613	3.3884	2.89773
SPT16	P32558	FACT complex subunit SPT16 OS=Saccharomyces cerevisiae (strain ATCC 204508 / S288c) GN=SPT16 PE=1 SV=1	1	1	3	3	10	6.99573	2737110	4772980	3089880	15064500	20993500	4520510	21062000	32931600	23965200	2.85564e+06	3.1912e+06	4.42961e+06	1.57169e+07	1.40362e+07	6.48054e+06	2.19741e+07	2.2018e+07	3.43562e+07	2.56344e+06	3.617e+06	4.35362e+06	1.36503e+07	1.41182e+07	1.00102e+07	2.85455e+07	1.94055e+07	2.22379e+07	1	1	1	5.32498	3.90329	2.29928	11.1356	5.36507	5.10791
AGX1	P43567	Alanine--glyoxylate aminotransferase 1 OS=Saccharomyces cerevisiae (strain ATCC 204508 / S288c) GN=AGX1 PE=1 SV=1	1	1	3	3	2	6.22012	716868	550198	366444	3750100	2797480	1332110	2172810	3259730	3501170	614889	496465	473456	3.21663e+06	2.52428e+06	1.72112e+06	1.86372e+06	2.94138e+06	4.52361e+06	551972	562708	465335	2.79368e+06	2.53903e+06	2.65855e+06	2.42106e+06	2.59238e+06	2.92802e+06	1	1	1	5.06127	4.51215	5.7132	4.3862	4.60696	6.2923
NOP13	P53883	Nucleolar protein 13 OS=Saccharomyces cerevisiae (strain ATCC 204508 / S288c) GN=NOP13 PE=1 SV=2	1	1	3	3	2	5.45305	532581	501494	323024	2603540	2729230	1304090	1914650	3256020	2807200	515651	408556	409524	2.52078e+06	2.22344e+06	1.6533e+06	1.85379e+06	2.6526e+06	3.55892e+06	462888	463069	402499	2.18932e+06	2.23643e+06	2.55379e+06	2.40816e+06	2.33786e+06	2.3036e+06	1	1	1	4.72971	4.82959	6.34482	5.20247	5.04863	5.72324
GLC3	P32775	1,4-alpha-glucan-branching enzyme OS=Saccharomyces cerevisiae (strain ATCC 204508 / S288c) GN=GLC3 PE=1 SV=2	1	1	3	3	7	6.1083	2928920	3695130	3185300	14649800	13543400	6764760	8329680	10853900	14473900	3.02224e+06	3.31634e+06	3.43953e+06	1.51166e+07	1.21551e+07	7.30467e+06	8.59508e+06	9.74127e+06	1.56291e+07	2.713e+06	3.75884e+06	3.38052e+06	1.31289e+07	1.22261e+07	1.12832e+07	1.11654e+07	8.58543e+06	1.01163e+07	1	1	1	4.83927	3.25262	3.33771	4.11554	2.28406	2.99253
HPC2	Q01448	Histone promoter control protein 2 OS=Saccharomyces cerevisiae (strain ATCC 204508 / S288c) GN=HPC2 PE=1 SV=2	1	1	3	3	2	6.02713	731461	1041790	909341	4952910	4336860	1334800	4416400	6390960	6220300	718521	840546	1.14735e+06	4.86529e+06	3.4991e+06	1.68417e+06	4.33827e+06	5.15641e+06	7.84841e+06	645000	952699	1.12767e+06	4.22556e+06	3.51955e+06	2.60147e+06	5.63563e+06	4.54458e+06	5.08008e+06	1	1	1	6.55126	3.69429	2.30694	8.73742	4.77021	4.50493
CIT1	P00890	Citrate synthase, mitochondrial OS=Saccharomyces cerevisiae (strain ATCC 204508 / S288c) GN=CIT1 PE=1 SV=2	1	1	3	3	7	7.46513	14125300	6436210	4205150	50803800	85837300	48810500	25713100	45266300	40183900	1.33602e+07	5.5009e+06	5.20192e+06	4.80519e+07	7.33634e+07	6.03803e+07	2.43203e+07	3.86882e+07	4.97089e+07	1.19931e+07	6.23488e+06	5.11268e+06	4.17337e+07	7.37921e+07	9.32669e+07	3.15933e+07	3.40977e+07	3.21753e+07	1	1	1	3.4798	11.8354	18.2423	2.63428	5.46886	6.29324
WTM1	Q12363	Transcriptional modulator WTM1 OS=Saccharomyces cerevisiae (strain ATCC 204508 / S288c) GN=WTM1 PE=1 SV=1	1	1	3	3	2	6.21959	1190850	743827	765739	10443100	6222050	3973690	3180700	4128240	4903760	985591	784617	877113	8.64309e+06	6.56326e+06	4.55165e+06	2.63246e+06	4.35463e+06	5.61699e+06	884742	889308	862067	7.50663e+06	6.60161e+06	7.03074e+06	3.4197e+06	3.83793e+06	3.63574e+06	1	1	1	8.48454	7.42331	8.15568	3.8652	4.31564	4.21747
KGD1	P20967	2-oxoglutarate dehydrogenase, mitochondrial OS=Saccharomyces cerevisiae (strain ATCC 204508 / S288c) GN=KGD1 PE=1 SV=2	1	1	3	3	6	6.61167	3992950	5369470	2485490	24367000	20565900	15150500	12911400	32997300	22833900	4.3091e+06	4.06314e+06	3.04361e+06	2.62963e+07	1.55625e+07	1.85525e+07	1.39337e+07	2.49694e+07	2.79613e+07	3.86818e+06	4.60528e+06	2.9914e+06	2.28387e+07	1.56534e+07	2.86573e+07	1.81006e+07	2.20067e+07	1.80986e+07	1	1	1	5.90424	3.39901	9.57992	4.67935	4.77858	6.05023
ADR1	P07248	Regulatory protein ADR1 OS=Saccharomyces cerevisiae (strain ATCC 204508 / S288c) GN=ADR1 PE=1 SV=2	1	1	3	3	5	6.71073	2645690	2860540	1526240	20228600	21388100	4021680	34222400	24532500	43707900	2.09046e+06	2.41528e+06	2.28771e+06	1.59834e+07	1.80589e+07	6.02816e+06	2.70404e+07	2.07139e+07	6.55145e+07	1.87656e+06	2.73755e+06	2.24846e+06	1.38817e+07	1.81645e+07	9.31145e+06	3.51268e+07	1.82561e+07	4.24059e+07	1	1	1	7.39746	6.63529	4.14125	18.7188	6.66877	18.86
DED1	P06634	ATP-dependent RNA helicase DED1 OS=Saccharomyces cerevisiae (strain ATCC 204508 / S288c) GN=DED1 PE=1 SV=2	1	1	3	3	7	6.66594	3429450	2202490	2439430	34301500	38090100	11435400	26219200	59169500	39946000	3.22894e+06	1.76954e+06	3.22482e+06	3.2296e+07	3.06026e+07	1.51171e+07	2.46863e+07	4.75384e+07	5.28069e+07	2.89855e+06	2.00565e+06	3.1695e+06	2.80495e+07	3.07815e+07	2.33508e+07	3.20687e+07	4.18978e+07	3.41806e+07	1	1	1	9.67708	15.3474	7.36733	11.0637	20.8899	10.7842
CCT3	P39077	T-complex protein 1 subunit gamma OS=Saccharomyces cerevisiae (strain ATCC 204508 / S288c) GN=CCT3 PE=1 SV=2	1	1	3	3	3	5.82064	1304150	944975	1119810	4313890	4078990	2725720	3003400	5460570	4087570	1.29209e+06	870131	1.22748e+06	4.27399e+06	3.75593e+06	2.98781e+06	2.97562e+06	5.02808e+06	4.4806e+06	1.15988e+06	986232	1.20643e+06	3.71201e+06	3.77787e+06	4.61514e+06	3.86548e+06	4.43148e+06	2.90018e+06	1	1	1	3.20035	3.83061	3.82546	3.33266	4.49334	2.40394
CCT4	P39078	T-complex protein 1 subunit delta OS=Saccharomyces cerevisiae (strain ATCC 204508 / S288c) GN=CCT4 PE=1 SV=2	1	1	3	3	6	6.12228	2826880	4684950	1336880	14277300	13211100	8330880	11453500	19595300	17117700	2.85175e+06	3.42669e+06	1.81183e+06	1.44029e+07	9.66293e+06	1.12906e+07	1.15543e+07	1.43325e+07	2.31991e+07	2.55995e+06	3.88391e+06	1.78075e+06	1.25091e+07	9.71939e+06	1.74401e+07	1.50096e+07	1.26319e+07	1.50162e+07	1	1	1	4.88646	2.50248	9.79367	5.86323	3.25236	8.43251
LSB3	P43603	LAS seventeen-binding protein 3 OS=Saccharomyces cerevisiae (strain ATCC 204508 / S288c) GN=LSB3 PE=1 SV=3	1	1	3	3	3	6.32255	488150	243254	129770	5301200	4576960	675988	3897620	6551610	6383040	341512	189595	237988	3.70874e+06	3.56733e+06	1.23971e+06	2.72679e+06	5.1064e+06	1.1706e+07	306567	214892	233906	3.22109e+06	3.58818e+06	1.91493e+06	3.54224e+06	4.5005e+06	7.57701e+06	1	1	1	10.5069	16.6976	8.18675	11.5545	20.9431	32.3934
RSC8	P43609	Chromatin structure-remodeling complex protein RSC8 OS=Saccharomyces cerevisiae (strain ATCC 204508 / S288c) GN=RSC8 PE=1 SV=1	1	1	3	3	4	5.74777	816534	965523	721600	7837770	6059290	2996390	4683700	8606430	6609830	796638	792438	901170	7.64679e+06	4.97307e+06	3.74204e+06	4.56958e+06	7.0636e+06	8.25469e+06	715124	898173	885712	6.64133e+06	5.00213e+06	5.78018e+06	5.93611e+06	6.22547e+06	5.34306e+06	1	1	1	9.28697	5.56923	6.52602	8.30081	6.93126	6.0325
NDI1	P32340	Rotenone-insensitive NADH-ubiquinone oxidoreductase, mitochondrial OS=Saccharomyces cerevisiae (strain ATCC 204508 / S288c) GN=NDI1 PE=1 SV=1	1	1	3	3	3	6.58282	7504850	4197070	3167930	33032500	41201700	23143900	18544400	31660700	25433000	6.92199e+06	3.65208e+06	3.94724e+06	3.0467e+07	3.58516e+07	2.88373e+07	1.71042e+07	2.75495e+07	3.16895e+07	6.21371e+06	4.13937e+06	3.87953e+06	2.6461e+07	3.60611e+07	4.45437e+07	2.22192e+07	2.42807e+07	2.05118e+07	1	1	1	4.25849	8.71174	11.4817	3.57583	5.86579	5.2872
RPC82	P32349	DNA-directed RNA polymerase III subunit RPC3 OS=Saccharomyces cerevisiae (strain ATCC 204508 / S288c) GN=RPC82 PE=1 SV=2	1	1	3	3	2	5.62875	263809	299319	NA	1527590	2155430	557749	2400900	5386290	3060560	261082	193431	NA	1.5118e+06	1.39292e+06	872087	2.37608e+06	3.48082e+06	4.78544e+06	234367	219240	NA	1.31302e+06	1.40106e+06	1.34708e+06	3.08665e+06	3.06781e+06	3.0975e+06	1	1	NA	5.60239	6.39051	NA	13.1701	13.9929	NA
BFR1	P38934	Nuclear segregation protein BFR1 OS=Saccharomyces cerevisiae (strain ATCC 204508 / S288c) GN=BFR1 PE=1 SV=1	1	1	3	3	22	7.13669	12204500	8320500	7762990	102902000	113880000	49029600	92435600	161084000	139792000	1.15367e+07	7.17941e+06	9.51762e+06	9.72714e+07	9.82623e+07	6.01115e+07	8.73777e+07	1.38993e+08	1.71388e+08	1.03562e+07	8.13735e+06	9.35435e+06	8.44814e+07	9.88365e+07	9.28517e+07	1.13508e+08	1.22501e+08	1.10936e+08	1	1	1	8.15755	12.146	9.92604	10.9604	15.0541	11.8592
PGI1	P12709	Glucose-6-phosphate isomerase OS=Saccharomyces cerevisiae (strain ATCC 204508 / S288c) GN=PGI1 PE=1 SV=3	1	1	3	3	6	6.69725	8016020	5396400	3657340	43199400	32461000	27463100	27514700	34770600	44133300	7.00556e+06	5.47473e+06	4.12499e+06	3.77539e+07	3.29322e+07	3.09747e+07	2.40463e+07	3.52753e+07	4.97764e+07	6.28873e+06	6.20522e+06	4.05423e+06	3.27897e+07	3.31246e+07	4.78453e+07	3.12374e+07	3.10897e+07	3.22191e+07	1	1	1	5.21404	5.33819	11.8013	4.9672	5.01026	7.94703
RPA190	P10964	DNA-directed RNA polymerase I subunit RPA190 OS=Saccharomyces cerevisiae (strain ATCC 204508 / S288c) GN=RPA190 PE=1 SV=2	1	1	3	3	4	5.75393	758816	809344	951285	5280270	4733900	1678930	3995590	7035030	5520000	752466	674635	1.15087e+06	5.23608e+06	3.94598e+06	2.03117e+06	3.96215e+06	5.8641e+06	6.6781e+06	675471	764651	1.13112e+06	4.5476e+06	3.96904e+06	3.13747e+06	5.14704e+06	5.1683e+06	4.32257e+06	1	1	1	6.73249	5.19065	2.77376	7.61992	6.75904	3.82148
PCK1	P10963	Phosphoenolpyruvate carboxykinase [ATP] OS=Saccharomyces cerevisiae (strain ATCC 204508 / S288c) GN=PCK1 PE=1 SV=2	1	1	3	3	11	7.46373	15396600	7106350	4471540	58654800	41541800	18854100	22703900	44503800	35062800	1.18165e+07	6.32622e+06	6.54478e+06	4.50161e+07	3.69814e+07	2.75958e+07	1.74247e+07	3.96182e+07	5.13197e+07	1.06074e+07	7.17033e+06	6.43251e+06	3.9097e+07	3.71975e+07	4.26261e+07	2.26355e+07	3.49174e+07	3.3218e+07	1	1	1	3.68582	5.1877	6.62667	2.13394	4.8697	5.16408
FAA2	P39518	Long-chain-fatty-acid--CoA ligase 2 OS=Saccharomyces cerevisiae (strain ATCC 204508 / S288c) GN=FAA2 PE=1 SV=1	1	1	3	3	6	6.41657	4259020	2371140	1153810	15187700	14957500	9835380	9182460	15584900	16231500	3.70972e+06	2.11545e+06	1.48477e+06	1.32289e+07	1.33446e+07	1.26565e+07	7.99817e+06	1.39043e+07	2.08873e+07	3.33013e+06	2.39771e+06	1.4593e+06	1.14895e+07	1.34225e+07	1.955e+07	1.039e+07	1.22545e+07	1.35198e+07	1	1	1	3.45015	5.59806	13.3969	3.12	5.11092	9.26463
RPS14A|RPS14B	P06367|P39516	40S ribosomal protein S14-A OS=Saccharomyces cerevisiae (strain ATCC 204508 / S288c) GN=RPS14A PE=1 SV=5|40S ribosomal protein S14-B OS=Saccharomyces cerevisiae (strain ATCC 204508 / S288c) GN=RPS14B PE=1 SV=2	1	1	3	3	5	7.08439	4801530	3979510	3334800	17702400	14521500	8708330	10990000	17689300	14713000	4.44615e+06	3.57591e+06	4.00782e+06	1.63922e+07	1.30487e+07	1.04658e+07	1.01766e+07	1.58953e+07	1.76824e+07	3.9912e+06	4.05304e+06	3.93907e+06	1.42368e+07	1.3125e+07	1.61661e+07	1.32199e+07	1.40092e+07	1.14454e+07	1	1	1	3.56704	3.23831	4.10404	3.31226	3.45647	2.9056
DHH1	P39517	ATP-dependent RNA helicase DHH1 OS=Saccharomyces cerevisiae (strain ATCC 204508 / S288c) GN=DHH1 PE=1 SV=1	1	1	3	3	2	6.18146	868562	446139	464876	4480820	4865800	2008620	3270530	7596180	5689130	811201	382223	580983	4.1849e+06	4.1687e+06	2.51029e+06	3.05454e+06	6.50791e+06	7.11004e+06	728196	433223	571017	3.63464e+06	4.19306e+06	3.87754e+06	3.968e+06	5.73572e+06	4.60215e+06	1	1	1	4.99129	9.67877	6.79059	5.44908	13.2397	8.05958
MRPL35	Q06678	54S ribosomal protein L35, mitochondrial OS=Saccharomyces cerevisiae (strain ATCC 204508 / S288c) GN=MRPL35 PE=1 SV=1	1	1	3	3	5	6.08354	1488980	971144	1090500	17012300	16347000	5853810	6467230	10563400	9416270	1.33548e+06	864263	1.3662e+06	1.52585e+07	1.45479e+07	7.33379e+06	5.80051e+06	9.40083e+06	1.17969e+07	1.19883e+06	979582	1.34277e+06	1.32522e+07	1.46329e+07	1.13282e+07	7.53515e+06	8.28538e+06	7.63586e+06	1	1	1	11.0543	14.9379	8.43645	6.28543	8.45809	5.68666
SPS19	P32573	Peroxisomal 2,4-dienoyl-CoA reductase SPS19 OS=Saccharomyces cerevisiae (strain ATCC 204508 / S288c) GN=SPS19 PE=1 SV=4	1	1	3	3	2	5.91792	638044	546326	281719	3135550	4225890	2177920	2270940	5552090	4531710	677964	410824	352578	3.33173e+06	3.17777e+06	2.72572e+06	2.41303e+06	4.17504e+06	5.67155e+06	608593	465640	346530	2.89365e+06	3.19634e+06	4.21031e+06	3.13464e+06	3.67965e+06	3.67105e+06	1	1	1	4.75465	6.86439	12.1499	5.15064	7.90236	10.5937
GCN2	P15442	eIF-2-alpha kinase GCN2 OS=Saccharomyces cerevisiae (strain ATCC 204508 / S288c) GN=GCN2 PE=1 SV=3	1	1	3	3	2	6.09425	675324	850582	678361	5260830	6908170	1466980	3306390	4789450	4337490	665828	626736	933776	5.18685e+06	5.09016e+06	2.01933e+06	3.2599e+06	3.52902e+06	5.97063e+06	597698	710361	917758	4.50484e+06	5.1199e+06	3.11917e+06	4.23477e+06	3.11029e+06	3.86465e+06	1	1	1	7.53699	7.20747	3.39868	7.08513	4.37846	4.21096
PAB1	P04147	Polyadenylate-binding protein, cytoplasmic and nuclear OS=Saccharomyces cerevisiae (strain ATCC 204508 / S288c) GN=PAB1 PE=1 SV=4	1	1	3	3	5	6.28697	6866620	4992040	3543540	11997200	15299000	6990680	12501300	22586300	18659500	6.65235e+06	4.07231e+06	4.48377e+06	1.16228e+07	1.24803e+07	8.84555e+06	1.21112e+07	1.8425e+07	2.36105e+07	5.97166e+06	4.61567e+06	4.40685e+06	1.00946e+07	1.25532e+07	1.36634e+07	1.5733e+07	1.62388e+07	1.52825e+07	1	1	1	1.69041	2.7197	3.10048	2.63462	3.51819	3.4679
GAP1	P19145	General amino-acid permease GAP1 OS=Saccharomyces cerevisiae (strain ATCC 204508 / S288c) GN=GAP1 PE=1 SV=2	1	1	3	3	2	5.54062	7509610	2436450	1142560	1652370	2071130	1477290	923461	3170880	1293740	6.48237e+06	1.88166e+06	1.71388e+06	1.42634e+06	1.59952e+06	2.21598e+06	797141	2.44885e+06	1.94065e+06	5.81908e+06	2.13272e+06	1.68448e+06	1.2388e+06	1.60887e+06	3.42293e+06	1.03553e+06	2.15829e+06	1.25614e+06	1	1	1	0.212885	0.754372	2.03205	0.177954	1.01199	0.745713
TFC8	Q12308	Transcription factor tau 60 kDa subunit OS=Saccharomyces cerevisiae (strain ATCC 204508 / S288c) GN=TFC8 PE=1 SV=1	1	1	3	3	3	5.90007	688558	1483290	728711	7122450	7808520	2219150	7638580	13875900	11669100	750112	994460	997720	7.75916e+06	5.23516e+06	3.03837e+06	8.32143e+06	9.30298e+06	1.59768e+07	673358	1.12715e+06	980605	6.73893e+06	5.26575e+06	4.69324e+06	1.081e+07	8.19915e+06	1.03414e+07	1	1	1	10.0079	4.67174	4.78606	16.0538	7.27423	10.5459
ACO1	P19414	Aconitate hydratase, mitochondrial OS=Saccharomyces cerevisiae (strain ATCC 204508 / S288c) GN=ACO1 PE=1 SV=2	1	1	3	3	10	6.89283	9090350	7511350	5800310	77489200	55645600	36739300	47702000	89969600	75007300	8.47539e+06	6.74531e+06	6.92768e+06	7.22471e+07	4.99706e+07	4.38801e+07	4.4475e+07	8.07941e+07	8.95861e+07	7.60817e+06	7.64533e+06	6.80885e+06	6.27475e+07	5.02626e+07	6.77798e+07	5.77752e+07	7.12076e+07	5.79869e+07	1	1	1	8.24739	6.57429	9.95466	7.59385	9.31386	8.5164
BGL2	P15703	Glucan 1,3-beta-glucosidase OS=Saccharomyces cerevisiae (strain ATCC 204508 / S288c) GN=BGL2 PE=1 SV=1	1	1	3	3	2	6.49889	2467010	1325220	1297440	13162500	8079860	7870670	5904620	6212880	7461490	1.97952e+06	1.51327e+06	1.41602e+06	1.05616e+07	9.2264e+06	8.59001e+06	4.73785e+06	7.09449e+06	8.14343e+06	1.77697e+06	1.71518e+06	1.39173e+06	9.17284e+06	9.28031e+06	1.32686e+07	6.15471e+06	6.2527e+06	5.27104e+06	1	1	1	5.16206	5.41068	9.53391	3.46359	3.6455	3.78741
RPT4	P53549	26S protease subunit RPT4 OS=Saccharomyces cerevisiae (strain ATCC 204508 / S288c) GN=RPT4 PE=1 SV=4	1	1	3	3	2	6.23005	1929530	1906670	1484320	11281900	9692460	6805920	6533580	11100600	11366200	1.96245e+06	1.71632e+06	1.62128e+06	1.14744e+07	8.72482e+06	7.43392e+06	6.64504e+06	9.99238e+06	1.2415e+07	1.76164e+06	1.94533e+06	1.59347e+06	9.96562e+06	8.7758e+06	1.14829e+07	8.63224e+06	8.80675e+06	8.03592e+06	1	1	1	5.657	4.51122	7.2062	4.90011	4.52713	5.04303
YDR341C	Q05506	Arginine--tRNA ligase, cytoplasmic OS=Saccharomyces cerevisiae (strain ATCC 204508 / S288c) GN=YDR341C PE=1 SV=1	1	1	3	3	3	5.62222	571145	770742	576618	2646180	2241990	1559860	2499970	3897530	4132480	607922	676602	617109	2.81657e+06	1.96815e+06	1.6694e+06	2.66095e+06	3.42148e+06	4.42267e+06	545718	766881	606523	2.44623e+06	1.97965e+06	2.57865e+06	3.45671e+06	3.01551e+06	2.86269e+06	1	1	1	4.48259	2.58143	4.25152	6.33424	3.93217	4.71983
AMS1	P22855	Alpha-mannosidase OS=Saccharomyces cerevisiae (strain ATCC 204508 / S288c) GN=AMS1 PE=1 SV=2	1	1	3	3	2	5.76688	1042080	1003830	1139070	6232630	4960990	3020710	3366200	6001930	6152990	1.07508e+06	933102	1.1878e+06	6.42997e+06	4.61145e+06	3.14994e+06	3.47278e+06	5.57904e+06	6.41623e+06	965070	1.0576e+06	1.16743e+06	5.58451e+06	4.63839e+06	4.86558e+06	4.51132e+06	4.91707e+06	4.15307e+06	1	1	1	5.78663	4.38575	4.16779	4.6746	4.64925	3.55746
GLT1	Q12680	Glutamate synthase [NADH] OS=Saccharomyces cerevisiae (strain ATCC 204508 / S288c) GN=GLT1 PE=1 SV=2	1	1	3	3	4	6.31436	467857	251516	NA	2537460	1802970	735986	1023610	6088330	2032740	433931	177448	NA	2.35346e+06	1.27202e+06	1.12475e+06	949385	4.29541e+06	3.10648e+06	389530	201125	NA	2.04401e+06	1.27945e+06	1.73735e+06	1.2333e+06	3.78574e+06	2.01075e+06	1	1	NA	5.24737	6.36149	NA	3.16612	18.8228	NA
HRK1	Q08732	Serine/threonine-protein kinase HRK1 OS=Saccharomyces cerevisiae (strain ATCC 204508 / S288c) GN=HRK1 PE=1 SV=1	1	1	3	3	3	5.94696	1257950	1144820	918032	10198000	11247600	3824010	2697630	4246960	4315060	1.20747e+06	943435	1.16057e+06	9.78877e+06	9.26904e+06	4.83427e+06	2.58938e+06	3.49988e+06	5.45505e+06	1.08392e+06	1.06932e+06	1.14066e+06	8.50166e+06	9.3232e+06	7.4673e+06	3.36373e+06	3.0846e+06	3.53092e+06	1	1	1	7.84345	8.71884	6.54648	3.10331	2.88465	3.09551
TAF14	P35189	Transcription initiation factor TFIID subunit 14 OS=Saccharomyces cerevisiae (strain ATCC 204508 / S288c) GN=TAF14 PE=1 SV=1	1	1	3	3	2	5.96033	693760	1550040	1169620	4261230	6904310	1294770	7714420	9026720	10308700	780873	1.07828e+06	1.49377e+06	4.7963e+06	4.80297e+06	1.65361e+06	8.68309e+06	6.27941e+06	1.31657e+07	700972	1.22216e+06	1.46815e+06	4.16564e+06	4.83103e+06	2.55426e+06	1.12798e+07	5.53434e+06	8.52183e+06	1	1	1	5.94267	3.95288	1.73978	16.0916	4.52834	5.80447
SEC4	P07560	Ras-related protein SEC4 OS=Saccharomyces cerevisiae (strain ATCC 204508 / S288c) GN=SEC4 PE=1 SV=1	1	1	3	3	2	6.01112	1845330	1043060	324627	4594180	3170900	2447080	2974310	5678990	4521380	1.43821e+06	896793	484456	3.5806e+06	2.72625e+06	3.65189e+06	2.31811e+06	4.88263e+06	6.74746e+06	1.29105e+06	1.01645e+06	476145	3.10979e+06	2.74218e+06	5.64092e+06	3.01134e+06	4.30329e+06	4.36747e+06	1	1	1	2.40874	2.6978	11.8471	2.33248	4.23364	9.17255
ADO1	P47143	Adenosine kinase OS=Saccharomyces cerevisiae (strain ATCC 204508 / S288c) GN=ADO1 PE=1 SV=1	1	1	3	3	2	5.84009	1296630	11122300	663187	6032050	5003590	1857350	6533810	3860990	5067160	1.20409e+06	6.39922e+06	1.24126e+06	5.60153e+06	2.87882e+06	3.47632e+06	6.06748e+06	2.22142e+06	9.48398e+06	1.08088e+06	7.25306e+06	1.21997e+06	4.86499e+06	2.89564e+06	5.36973e+06	7.88196e+06	1.95784e+06	6.13875e+06	1	1	1	4.50095	0.39923	4.40154	7.29216	0.269933	5.0319
YAF9	P53930	Protein AF-9 homolog OS=Saccharomyces cerevisiae (strain ATCC 204508 / S288c) GN=YAF9 PE=1 SV=1	1	1	3	3	2	5.95231	797361	831796	658430	5014440	5502730	1996080	5561500	7684320	6852060	758862	679435	846976	4.77233e+06	4.49479e+06	2.56767e+06	5.29297e+06	6.27677e+06	8.81419e+06	681213	770091	832447	4.14482e+06	4.52105e+06	3.96617e+06	6.87584e+06	5.53201e+06	5.70521e+06	1	1	1	6.08448	5.8708	4.76448	10.0935	7.18357	6.85354
FRA1	Q07825	Putative Xaa-Pro aminopeptidase FRA1 OS=Saccharomyces cerevisiae (strain ATCC 204508 / S288c) GN=FRA1 PE=1 SV=1	1	1	3	3	4	6.39722	2897110	3218490	2989030	13388200	13446100	7307470	10625200	21463400	17877500	3.15193e+06	2.67068e+06	3.31092e+06	1.45658e+07	1.11575e+07	8.09441e+06	1.15598e+07	1.78102e+07	1.98027e+07	2.82941e+06	3.02703e+06	3.25412e+06	1.26506e+07	1.12227e+07	1.25031e+07	1.50167e+07	1.5697e+07	1.28178e+07	1	1	1	4.47109	3.70749	3.84223	5.30735	5.18559	3.93895
RET2	P43621	Coatomer subunit delta OS=Saccharomyces cerevisiae (strain ATCC 204508 / S288c) GN=RET2 PE=1 SV=3	1	1	3	3	2	5.82201	1119460	693752	509984	2820260	2667880	2034680	1881520	2890370	2783060	1.0213e+06	655402	591711	2.57295e+06	2.5204e+06	2.36075e+06	1.71653e+06	2.73059e+06	3.22906e+06	916794	742852	581561	2.23464e+06	2.53513e+06	3.64655e+06	2.22986e+06	2.4066e+06	2.09009e+06	1	1	1	2.43745	3.4127	6.27027	2.43224	3.23967	3.59393
EFT1	P32324	Elongation factor 2 OS=Saccharomyces cerevisiae (strain ATCC 204508 / S288c) GN=EFT1 PE=1 SV=1	1	1	3	3	18	7.3045	21610100	15786700	13136800	99597000	86567500	55339200	60759000	105837000	98841600	2.04468e+07	1.44434e+07	1.51755e+07	9.42356e+07	7.92015e+07	6.39272e+07	5.74883e+07	9.68314e+07	1.14181e+08	1.83546e+07	1.63706e+07	1.49151e+07	8.18448e+07	7.96643e+07	9.87456e+07	7.46802e+07	8.5342e+07	7.39063e+07	1	1	1	4.45908	4.86631	6.62049	4.06874	5.21313	4.95512
EBP2	P36049	rRNA-processing protein EBP2 OS=Saccharomyces cerevisiae (strain ATCC 204508 / S288c) GN=EBP2 PE=1 SV=1	1	1	3	3	5	6.07885	1353350	1189400	932188	12986600	12194700	2984760	6412490	10129400	10199400	1.19579e+06	962032	1.30436e+06	1.14747e+07	9.86354e+06	4.17641e+06	5.66594e+06	8.19304e+06	1.42714e+07	1.07343e+06	1.0904e+06	1.28198e+06	9.9659e+06	9.92117e+06	6.45112e+06	7.36034e+06	7.22091e+06	9.23756e+06	1	1	1	9.28413	9.09869	5.03214	6.85681	6.62228	7.20568
SAM2	P19358	S-adenosylmethionine synthase 2 OS=Saccharomyces cerevisiae (strain ATCC 204508 / S288c) GN=SAM2 PE=1 SV=3	1	1	3	3	2	5.64118	1122870	637716	191159	1736340	1507360	793631	896144	1716870	1592390	895577	518387	294846	1.38487e+06	1.2253e+06	1.2241e+06	714745	1.39561e+06	2.45612e+06	803939	587555	289788	1.20277e+06	1.23246e+06	1.89082e+06	928490	1.23002e+06	1.58978e+06	1	1	1	1.4961	2.09761	6.52485	1.15493	2.09345	5.48603
FPR3	P38911	FK506-binding nuclear protein OS=Saccharomyces cerevisiae (strain ATCC 204508 / S288c) GN=FPR3 PE=1 SV=2	1	1	3	3	3	6.23513	2659320	2431140	2498370	44036700	44121200	8691160	15506800	19603300	22609500	2.33736e+06	2.03488e+06	3.39604e+06	3.87053e+07	3.69297e+07	1.18139e+07	1.36294e+07	1.64081e+07	3.07331e+07	2.0982e+06	2.30639e+06	3.33778e+06	3.3616e+07	3.71455e+07	1.82484e+07	1.77053e+07	1.44612e+07	1.98928e+07	1	1	1	16.0214	16.1055	5.46724	8.43835	6.27005	5.95988
NHP6B	P11633	Non-histone chromosomal protein 6B OS=Saccharomyces cerevisiae (strain ATCC 204508 / S288c) GN=NHP6B PE=1 SV=3	1	1	3	3	5	7.72321	5515680	4677310	3786100	66276800	65486800	10175900	67179700	139308000	103413000	4.79177e+06	3.38e+06	6.0308e+06	5.75782e+07	4.73232e+07	1.6209e+07	5.83626e+07	1.00669e+08	1.64724e+08	4.30146e+06	3.83099e+06	5.92735e+06	5.00074e+07	4.75998e+07	2.50373e+07	7.58159e+07	8.87244e+07	1.06622e+08	1	1	1	11.6257	12.4249	4.22404	17.6256	23.1596	17.9882
NHP6A	P11632	Non-histone chromosomal protein 6A OS=Saccharomyces cerevisiae (strain ATCC 204508 / S288c) GN=NHP6A PE=1 SV=1	1	1	3	3	4	7.35182	1549170	2293600	1680810	14594100	14797700	4110230	14647700	32214000	22483900	1.6263e+06	1.61702e+06	2.271e+06	1.53207e+07	1.04326e+07	5.55348e+06	1.5377e+07	2.27114e+07	3.03788e+07	1.45989e+06	1.83278e+06	2.23204e+06	1.33062e+07	1.04936e+07	8.57822e+06	1.99755e+07	2.00166e+07	1.96634e+07	1	1	1	9.11452	5.72549	3.84321	13.6828	10.9214	8.80961
KIN2	P13186	Serine/threonine-protein kinase KIN2 OS=Saccharomyces cerevisiae (strain ATCC 204508 / S288c) GN=KIN2 PE=1 SV=3	1	1	3	3	6	6.8015	1518900	1388840	1126870	50547700	55753400	12864500	3059340	6769240	5461290	1.47159e+06	1.02969e+06	1.56878e+06	4.89731e+07	4.13358e+07	1.79094e+07	2.96404e+06	5.01874e+06	7.60298e+06	1.32101e+06	1.16708e+06	1.54187e+06	4.25338e+07	4.15773e+07	2.76639e+07	3.85044e+06	4.42325e+06	4.92122e+06	1	1	1	32.1979	35.625	17.9418	2.91477	3.79	3.19172
KIN1	P13185	Serine/threonine protein kinase KIN1 OS=Saccharomyces cerevisiae (strain ATCC 204508 / S288c) GN=KIN1 PE=1 SV=3	1	1	3	3	2	5.40693	308411	157625	136472	1101600	976145	372699	760539	1572100	906301	252795	132073	198708	902947	817908	542663	623390	1.31726e+06	1.31961e+06	226928	149696	195299	784220	822687	838228	809814	1.16096e+06	854149	1	1	1	3.45581	5.49573	4.29202	3.5686	7.75545	4.37353
CST6	P40535	ATF/CREB activator 2 OS=Saccharomyces cerevisiae (strain ATCC 204508 / S288c) GN=CST6 PE=1 SV=1	1	1	3	3	3	6.27089	3661260	2762390	2689080	18070900	19213300	3784520	8768350	12770400	9527560	3.0536e+06	2.18749e+06	4.07157e+06	1.50717e+07	1.52147e+07	5.73019e+06	7.31306e+06	1.01126e+07	1.44258e+07	2.74114e+06	2.47936e+06	4.00173e+06	1.30899e+07	1.53036e+07	8.85119e+06	9.50003e+06	8.91274e+06	9.33747e+06	1	1	1	4.77535	6.17238	2.21184	3.46572	3.59477	2.33336
PDE2	P06776	3',5'-cyclic-nucleotide phosphodiesterase 2 OS=Saccharomyces cerevisiae (strain ATCC 204508 / S288c) GN=PDE2 PE=1 SV=2	1	1	3	3	2	5.94746	542668	467905	252620	2702470	3135980	847997	1885050	5615800	3578410	531301	318314	379283	2.64586e+06	2.1334e+06	1.27318e+06	1.84557e+06	3.82041e+06	5.37261e+06	476937	360787	372776	2.29796e+06	2.14586e+06	1.96663e+06	2.39748e+06	3.3671e+06	3.47756e+06	1	1	1	4.81817	5.94773	5.27562	5.02683	9.33267	9.32881
SPT6	P23615	Transcription elongation factor SPT6 OS=Saccharomyces cerevisiae (strain ATCC 204508 / S288c) GN=SPT6 PE=1 SV=1	1	1	3	3	3	5.72498	901749	2467770	579343	7570440	7722070	4359730	4038760	4059480	5317230	933601	1.81146e+06	762318	7.83785e+06	5.66837e+06	5.73667e+06	4.18142e+06	2.97985e+06	6.99658e+06	838072	2.05316e+06	749241	6.80726e+06	5.70149e+06	8.86119e+06	5.43187e+06	2.62628e+06	4.52871e+06	1	1	1	8.12253	2.77693	11.8269	6.48139	1.27914	6.0444
YAT1	P80235	Putative mitochondrial carnitine O-acetyltransferase OS=Saccharomyces cerevisiae (strain ATCC 204508 / S288c) GN=YAT1 PE=1 SV=2	1	1	3	3	5	6.62087	4629200	2165340	1457570	24707000	20081100	12908900	16955200	28253500	26030400	3.77638e+06	2.05673e+06	1.88109e+06	2.01553e+07	1.90738e+07	1.66598e+07	1.38316e+07	2.68363e+07	3.35939e+07	3.38997e+06	2.33116e+06	1.84882e+06	1.75051e+07	1.91853e+07	2.57336e+07	1.79679e+07	2.36521e+07	2.17445e+07	1	1	1	5.16381	8.22995	13.919	5.30033	10.1461	11.7613
SAS3	P34218	Histone acetyltransferase SAS3 OS=Saccharomyces cerevisiae (strain ATCC 204508 / S288c) GN=SAS3 PE=1 SV=1	1	1	3	3	7	6.98906	700320	1231970	1016780	11006100	10244600	2442970	23942200	26711700	26336700	667316	960287	1.36896e+06	1.04874e+07	7.98538e+06	3.28914e+06	2.28139e+07	2.0821e+07	3.54589e+07	599034	1.08842e+06	1.34548e+06	9.10845e+06	8.03205e+06	5.0806e+06	2.96364e+07	1.83505e+07	2.29517e+07	1	1	1	15.2052	7.37957	3.77605	49.4736	16.8598	17.0584
EDE1	P34216	EH domain-containing and endocytosis protein 1 OS=Saccharomyces cerevisiae (strain ATCC 204508 / S288c) GN=EDE1 PE=1 SV=2	1	1	3	3	2	5.74277	791590	622669	715037	2046460	1987730	1163650	3075110	6363460	4438020	805672	544002	804132	2.08286e+06	1.7366e+06	1.30864e+06	3.12981e+06	5.55951e+06	4.99101e+06	723233	616588	790338	1.80899e+06	1.74675e+06	2.02141e+06	4.06578e+06	4.89985e+06	3.23056e+06	1	1	1	2.50126	2.83293	2.55765	5.62168	7.94672	4.08756
ATP3	P38077	ATP synthase subunit gamma, mitochondrial OS=Saccharomyces cerevisiae (strain ATCC 204508 / S288c) GN=ATP3 PE=1 SV=1	1	1	3	3	6	6.20873	5597990	3316270	2411800	13695700	10150500	11644100	7697370	10327300	9797400	4.84923e+06	3.4269e+06	2.69432e+06	1.18638e+07	1.04891e+07	1.30081e+07	6.6678e+06	1.06718e+07	1.09451e+07	4.35304e+06	3.88415e+06	2.6481e+06	1.03039e+07	1.05504e+07	2.0093e+07	8.66181e+06	9.40557e+06	7.08447e+06	1	1	1	2.36705	2.71627	7.58772	1.98983	2.42152	2.6753
ETR1	P38071	Enoyl-[acyl-carrier protein] reductase [NADPH, B-specific], mitochondrial OS=Saccharomyces cerevisiae (strain ATCC 204508 / S288c) GN=ETR1 PE=1 SV=3	1	1	3	3	2	5.92873	1224640	910855	786418	5952870	5922560	3488350	4020380	5965190	5846460	1.15724e+06	834331	908548	5.62526e+06	5.42499e+06	4.03009e+06	3.79912e+06	5.46403e+06	6.75441e+06	1.03883e+06	945655	892963	4.88561e+06	5.45669e+06	6.22511e+06	4.93525e+06	4.81571e+06	4.37197e+06	1	1	1	4.70299	5.77027	6.9713	4.75078	5.09245	4.89602
PUF3	Q07807	mRNA-binding protein PUF3 OS=Saccharomyces cerevisiae (strain ATCC 204508 / S288c) GN=PUF3 PE=1 SV=1	1	1	3	3	2	5.71591	273572	130418	91499.1	1770030	1638100	829994	1213190	2166310	1669760	224688	115978	125277	1.45375e+06	1.45672e+06	1.13639e+06	996410	1.92645e+06	2.28617e+06	201698	131452	123128	1.2626e+06	1.46524e+06	1.75534e+06	1.29439e+06	1.69787e+06	1.47978e+06	1	1	1	6.25986	11.1465	14.2562	6.41746	12.9162	12.0182
CPS1	P27614	Carboxypeptidase S OS=Saccharomyces cerevisiae (strain ATCC 204508 / S288c) GN=CPS1 PE=1 SV=2	1	1	3	3	3	5.66225	1930010	986660	910495	5519930	4598410	2567980	3000790	4199020	4411970	1.60694e+06	976211	1.10525e+06	4.59594e+06	4.54971e+06	3.11727e+06	2.49848e+06	4.15455e+06	5.35569e+06	1.44252e+06	1.10647e+06	1.08629e+06	3.99163e+06	4.5763e+06	4.81512e+06	3.24565e+06	3.6616e+06	3.46661e+06	1	1	1	2.76713	4.13596	4.43262	2.25	3.30927	3.19123
HCR1	Q05775	Eukaryotic translation initiation factor 3 subunit J OS=Saccharomyces cerevisiae (strain ATCC 204508 / S288c) GN=HCR1 PE=1 SV=1	1	1	3	3	6	6.90602	10644100	7370090	7440320	43772500	48027900	24761400	25489000	26941100	26045200	9.39274e+06	6.99708e+06	8.88105e+06	3.86264e+07	4.55971e+07	2.95562e+07	2.24924e+07	2.55776e+07	3.10886e+07	8.43165e+06	7.93069e+06	8.72871e+06	3.35475e+07	4.58636e+07	4.56542e+07	2.92188e+07	2.25427e+07	2.01229e+07	1	1	1	3.97876	5.78305	5.23035	3.46537	2.84246	2.30537
NAT10	P53914	RNA cytidine acetyltransferase OS=Saccharomyces cerevisiae (strain ATCC 204508 / S288c) GN=NAT10 PE=1 SV=1	1	1	3	3	3	5.58768	698875	729655	509659	3916280	3439680	1623740	2940010	4122820	4012950	651369	625377	638010	3.65007e+06	2.9481e+06	2.03266e+06	2.74016e+06	3.53361e+06	5.02356e+06	584719	708821	627066	3.17013e+06	2.96533e+06	3.13976e+06	3.55961e+06	3.11434e+06	3.25163e+06	1	1	1	5.42163	4.18347	5.00707	6.08773	4.39368	5.18547
CHD1	P32657	Chromo domain-containing protein 1 OS=Saccharomyces cerevisiae (strain ATCC 204508 / S288c) GN=CHD1 PE=1 SV=1	1	1	3	3	13	6.65024	6505720	7056070	6552680	31048700	34338600	9792770	26762300	54246100	35491700	6.52312e+06	5.26145e+06	8.76428e+06	3.11317e+07	2.5605e+07	1.30979e+07	2.68339e+07	4.04493e+07	4.74705e+07	5.85566e+06	5.96349e+06	8.61393e+06	2.70383e+07	2.57547e+07	2.02318e+07	3.48586e+07	3.56499e+07	3.07265e+07	1	1	1	4.61747	4.31873	2.34873	5.95297	5.97802	3.56707
FOX2	Q02207	Peroxisomal hydratase-dehydrogenase-epimerase OS=Saccharomyces cerevisiae (strain ATCC 204508 / S288c) GN=FOX2 PE=2 SV=1	1	1	3	3	20	7.2502	12065900	4966190	3979500	98068100	111407000	58697000	58244600	141458000	106364000	1.0926e+07	4.31041e+06	5.06328e+06	8.88034e+07	9.66958e+07	7.46825e+07	5.27421e+07	1.22779e+08	1.35331e+08	9.80803e+06	4.88554e+06	4.97642e+06	7.71268e+07	9.72608e+07	1.15359e+08	6.85146e+07	1.0821e+08	8.75965e+07	1	1	1	7.86364	19.9079	23.1811	6.98557	22.1491	17.6023
TUF1	P02992	Elongation factor Tu, mitochondrial OS=Saccharomyces cerevisiae (strain ATCC 204508 / S288c) GN=TUF1 PE=1 SV=1	1	1	3	3	3	5.76481	2979830	4220720	3397080	8293800	8236890	5462900	6164110	9592240	9016350	3.28492e+06	3.58345e+06	3.62959e+06	9.14296e+06	6.99324e+06	5.8368e+06	6.79522e+06	8.14395e+06	9.63346e+06	2.9488e+06	4.06159e+06	3.56733e+06	7.94077e+06	7.0341e+06	9.01586e+06	8.82733e+06	7.17764e+06	6.23551e+06	1	1	1	2.69289	1.73186	2.52734	2.99354	1.7672	1.74795
TEF1	P02994	Elongation factor 1-alpha OS=Saccharomyces cerevisiae (strain ATCC 204508 / S288c) GN=TEF1 PE=1 SV=1	1	1	3	3	11	8.0807	43209100	37838500	31581400	182028000	206140000	97763700	135627000	241677000	183931000	4.29169e+07	3.10859e+07	3.87034e+07	1.80797e+08	1.69352e+08	1.19811e+08	1.3471e+08	1.98547e+08	2.2541e+08	3.85255e+07	3.52336e+07	3.80395e+07	1.57024e+08	1.70342e+08	1.85067e+08	1.74995e+08	1.74989e+08	1.45902e+08	1	1	1	4.07586	4.83464	4.86511	4.54231	4.96653	3.83555
ARD1	P07347	N-terminal acetyltransferase A complex catalytic subunit ARD1 OS=Saccharomyces cerevisiae (strain ATCC 204508 / S288c) GN=ARD1 PE=1 SV=2	1	1	3	3	2	5.75496	629503	430213	338777	1914710	2832920	912559	1304660	2484480	2301440	619934	340549	434580	1.88561e+06	2.24249e+06	1.17062e+06	1.28483e+06	1.96667e+06	2.95227e+06	556501	385988	427125	1.63767e+06	2.25559e+06	1.80821e+06	1.66906e+06	1.73332e+06	1.91093e+06	1	1	1	2.9428	5.84368	4.23344	2.9992	4.4906	4.47393
ILV2	P07342	Acetolactate synthase catalytic subunit, mitochondrial OS=Saccharomyces cerevisiae (strain ATCC 204508 / S288c) GN=ILV2 PE=1 SV=1	1	1	3	3	2	5.80883	1788900	1206790	740258	2774320	2778250	1604570	2362510	3158440	4244620	1.61044e+06	1.12392e+06	882917	2.49755e+06	2.58748e+06	1.9138e+06	2.12683e+06	2.94156e+06	5.06262e+06	1.44565e+06	1.27389e+06	867771	2.16915e+06	2.6026e+06	2.95616e+06	2.76285e+06	2.59253e+06	3.27691e+06	1	1	1	1.50047	2.04303	3.40661	1.91114	2.03513	3.77624
MRPL40	P36534	54S ribosomal protein L40, mitochondrial OS=Saccharomyces cerevisiae (strain ATCC 204508 / S288c) GN=MRPL40 PE=1 SV=2	1	1	3	3	3	6.0491	827917	1933640	1183170	5106210	7410060	2024900	2506900	3650080	4464150	989597	1.35755e+06	1.40993e+06	6.10338e+06	5.20237e+06	2.41298e+06	2.99646e+06	2.5626e+06	5.31971e+06	888338	1.53868e+06	1.38574e+06	5.30086e+06	5.23277e+06	3.72722e+06	3.89255e+06	2.25854e+06	3.44332e+06	1	1	1	5.96716	3.40081	2.6897	4.38183	1.46784	2.48482
MRPL36	P36531	54S ribosomal protein L36, mitochondrial OS=Saccharomyces cerevisiae (strain ATCC 204508 / S288c) GN=MRPL36 PE=1 SV=3	1	1	3	3	2	5.91631	763941	1190020	455880	3241150	3122350	1647190	1972900	3230900	2892390	771499	890564	603204	3.27322e+06	2.33664e+06	2.1795e+06	1.99242e+06	2.41788e+06	3.8271e+06	692557	1.00939e+06	592856	2.84283e+06	2.3503e+06	3.36658e+06	2.58825e+06	2.13099e+06	2.47719e+06	1	1	1	4.10483	2.32843	5.67858	3.73724	2.11116	4.1784
TMA7	Q3E764	Translation machinery-associated protein 7 OS=Saccharomyces cerevisiae (strain ATCC 204508 / S288c) GN=TMA7 PE=1 SV=1	1	1	3	3	2	6.3567	1665840	1448300	1573770	8915210	11109400	5163570	7139030	10375400	8737640	1.67568e+06	1.25228e+06	1.80942e+06	8.9679e+06	9.60579e+06	5.93675e+06	7.18122e+06	8.97113e+06	1.0046e+07	1.50422e+06	1.41937e+06	1.77838e+06	7.78873e+06	9.66192e+06	9.17025e+06	9.32876e+06	7.90667e+06	6.50252e+06	1	1	1	5.1779	6.80719	5.15651	6.20171	5.57055	3.65642
RNR4	P49723	Ribonucleoside-diphosphate reductase small chain 2 OS=Saccharomyces cerevisiae (strain ATCC 204508 / S288c) GN=RNR4 PE=1 SV=1	1	1	3	3	2	5.60883	766478	716629	560135	3142670	2800330	1824260	1968950	3436540	3272940	768614	634316	631064	3.15143e+06	2.47868e+06	2.05526e+06	1.97444e+06	3.04181e+06	3.68738e+06	689967	718952	620238	2.73705e+06	2.49316e+06	3.17468e+06	2.56489e+06	2.68089e+06	2.38675e+06	1	1	1	3.96693	3.46777	5.11848	3.71741	3.72889	3.84812
SPO22	P40511	Sporulation-specific protein 22 OS=Saccharomyces cerevisiae (strain ATCC 204508 / S288c) GN=SPO22 PE=3 SV=2	1	1	3	3	2	5.88453	994562	2154950	981930	4590390	7659580	2211870	1236570	7861550	4362640	1.49242e+06	1.13731e+06	1.23987e+06	6.88826e+06	4.04248e+06	2.79291e+06	1.85558e+06	4.14908e+06	5.50866e+06	1.33971e+06	1.28907e+06	1.2186e+06	5.98254e+06	4.0661e+06	4.31409e+06	2.41049e+06	3.65677e+06	3.56562e+06	1	1	1	4.46553	3.1543	3.54018	1.79925	2.83676	2.92599
RPG1	P38249	Eukaryotic translation initiation factor 3 subunit A OS=Saccharomyces cerevisiae (strain ATCC 204508 / S288c) GN=RPG1 PE=1 SV=1	1	1	3	3	9	6.4048	7668670	6172990	5514370	32516400	33097600	18546100	25187900	39989500	38626300	7.49956e+06	5.53015e+06	6.29418e+06	3.17993e+07	2.96509e+07	2.11688e+07	2.46324e+07	3.58251e+07	4.40886e+07	6.73218e+06	6.26803e+06	6.18621e+06	2.76181e+07	2.98241e+07	3.26985e+07	3.19988e+07	3.15743e+07	2.85375e+07	1	1	1	4.1024	4.75814	5.28571	4.75311	5.03735	4.61308
ARX1	Q03862	Probable metalloprotease ARX1 OS=Saccharomyces cerevisiae (strain ATCC 204508 / S288c) GN=ARX1 PE=1 SV=1	1	1	3	3	2	5.94002	516029	138366	445746	3521090	3007710	785481	2695240	6436550	4286050	423141	138734	542153	2.88728e+06	3.01572e+06	955366	2.21008e+06	6.45369e+06	5.21304e+06	379844	157246	532852	2.50763e+06	3.03334e+06	1.47571e+06	2.87101e+06	5.68793e+06	3.37427e+06	1	1	1	6.60175	19.2905	2.76946	7.55839	36.1723	6.33247
CUE5	Q08412	Ubiquitin-binding protein CUE5 OS=Saccharomyces cerevisiae (strain ATCC 204508 / S288c) GN=CUE5 PE=1 SV=1	1	1	3	3	3	5.61934	1668980	1443690	939629	6479490	8963990	6411630	2917540	5944910	5215110	1.84188e+06	1.18371e+06	1.03842e+06	7.15074e+06	7.34978e+06	7.08574e+06	3.21979e+06	4.87437e+06	5.76342e+06	1.65341e+06	1.34166e+06	1.02061e+06	6.2105e+06	7.39273e+06	1.09451e+07	4.18266e+06	4.296e+06	3.73052e+06	1	1	1	3.75617	5.51015	10.7241	2.52971	3.20201	3.6552
YGR130C	P53278	Uncharacterized protein YGR130C OS=Saccharomyces cerevisiae (strain ATCC 204508 / S288c) GN=YGR130C PE=1 SV=1	1	1	3	3	2	6.21994	1688830	1405790	717045	17113400	15839800	7637070	6133480	6410810	8986590	1.42987e+06	1.27932e+06	930630	1.44893e+07	1.44148e+07	9.91191e+06	5.19299e+06	5.83407e+06	1.16634e+07	1.28356e+06	1.45002e+06	914666	1.25841e+07	1.4499e+07	1.53105e+07	6.74595e+06	5.14184e+06	7.54944e+06	1	1	1	9.80406	9.9992	16.7389	5.25565	3.54605	8.25377
SEY1	Q99287	Protein SEY1 OS=Saccharomyces cerevisiae (strain ATCC 204508 / S288c) GN=SEY1 PE=1 SV=1	1	1	3	3	5	5.85527	4360040	4208920	3135740	10265300	9424580	5719070	8293010	13978000	10344200	4.22075e+06	3.56425e+06	3.8251e+06	9.93735e+06	7.98105e+06	6.97635e+06	8.02807e+06	1.1837e+07	1.26183e+07	3.78887e+06	4.03983e+06	3.75949e+06	8.63071e+06	8.02768e+06	1.07761e+07	1.04289e+07	1.04325e+07	8.1675e+06	1	1	1	2.27791	1.98713	2.86637	2.7525	2.58242	2.1725
SLA1	P32790	Actin cytoskeleton-regulatory complex protein SLA1 OS=Saccharomyces cerevisiae (strain ATCC 204508 / S288c) GN=SLA1 PE=1 SV=1	1	1	3	3	3	5.93178	634503	559702	390347	3019450	3011070	1068180	2455350	5523890	3866620	607715	426980	534236	2.89197e+06	2.29706e+06	1.46193e+06	2.35169e+06	4.21401e+06	5.29193e+06	545532	483952	525072	2.51171e+06	2.31048e+06	2.25818e+06	3.05496e+06	3.714e+06	3.42534e+06	1	1	1	4.60415	4.77419	4.30071	5.59997	7.67432	6.52355
MRP7	P12687	54S ribosomal protein L2, mitochondrial OS=Saccharomyces cerevisiae (strain ATCC 204508 / S288c) GN=MRP7 PE=1 SV=1	1	1	3	3	4	6.23624	1123160	932251	949380	10981100	9690460	2078280	5930560	9247870	9308230	977622	776277	1.30987e+06	9.55818e+06	8.06916e+06	2.86742e+06	5.16208e+06	7.70062e+06	1.28426e+07	877589	879856	1.2874e+06	8.30139e+06	8.11631e+06	4.42918e+06	6.7058e+06	6.78691e+06	8.31271e+06	1	1	1	9.45932	9.2246	3.44042	7.64117	7.71367	6.457
PGM2	P37012	Phosphoglucomutase 2 OS=Saccharomyces cerevisiae (strain ATCC 204508 / S288c) GN=PGM2 PE=1 SV=1	1	1	3	3	8	6.31261	5194170	4638190	4036000	29325200	22478400	13797400	15533200	27203000	30940900	5.11632e+06	4.30083e+06	4.41881e+06	2.88857e+07	2.08435e+07	1.51061e+07	1.53004e+07	2.52244e+07	3.38756e+07	4.5928e+06	4.87469e+06	4.34301e+06	2.50876e+07	2.09652e+07	2.33337e+07	1.9876e+07	2.22314e+07	2.19268e+07	1	1	1	5.46236	4.30083	5.3727	4.32763	4.56058	5.04877
MRT4	P33201	Ribosome assembly factor MRT4 OS=Saccharomyces cerevisiae (strain ATCC 204508 / S288c) GN=MRT4 PE=1 SV=1	1	1	3	3	3	6.12173	1470340	1219590	995714	9592960	9765060	3612920	7928820	12843600	11399000	1.36181e+06	1.0176e+06	1.28846e+06	8.88485e+06	8.1478e+06	4.67515e+06	7.34355e+06	1.07165e+07	1.47504e+07	1.22246e+06	1.15338e+06	1.26636e+06	7.7166e+06	8.19541e+06	7.22151e+06	9.53964e+06	9.44492e+06	9.54758e+06	1	1	1	6.31234	7.10554	5.70257	7.80363	8.18889	7.53938
RPB3	P16370	DNA-directed RNA polymerase II subunit RPB3 OS=Saccharomyces cerevisiae (strain ATCC 204508 / S288c) GN=RPB3 PE=1 SV=2	1	1	3	3	2	6.14357	950820	1508300	1008600	5150880	6886750	1482210	11909100	16902900	11459600	937905	1.03042e+06	1.49669e+06	5.08091e+06	4.70479e+06	2.1995e+06	1.17473e+07	1.15475e+07	1.70053e+07	841936	1.16791e+06	1.47102e+06	4.41284e+06	4.73228e+06	3.39747e+06	1.52604e+07	1.01773e+07	1.10071e+07	1	1	1	5.2413	4.05194	2.3096	18.1254	8.71416	7.48263
SEC23	P15303	Protein transport protein SEC23 OS=Saccharomyces cerevisiae (strain ATCC 204508 / S288c) GN=SEC23 PE=1 SV=1	1	1	3	3	4	6.17047	2564480	2406530	1937320	9078540	9140180	5514070	7867300	14988600	13909200	2.67464e+06	2.06333e+06	2.16649e+06	9.46853e+06	7.83669e+06	6.16634e+06	8.20526e+06	1.28511e+07	1.55545e+07	2.40097e+06	2.33864e+06	2.12933e+06	8.22354e+06	7.88249e+06	9.52489e+06	1.0659e+07	1.13262e+07	1.00681e+07	1	1	1	3.42509	3.37054	4.47319	4.43948	4.84308	4.72829
YCS4	Q06156	Condensin complex subunit 1 OS=Saccharomyces cerevisiae (strain ATCC 204508 / S288c) GN=YCS4 PE=1 SV=1	1	1	3	3	4	5.62956	1041780	964669	987438	7378540	7707090	2242380	8028330	8884270	10652300	943287	853899	1.23201e+06	6.68095e+06	6.82211e+06	2.79778e+06	7.26931e+06	7.86412e+06	1.32907e+07	846767	967834	1.21088e+06	5.80248e+06	6.86197e+06	4.32161e+06	9.44319e+06	6.93101e+06	8.60274e+06	1	1	1	6.85252	7.09003	3.569	11.1521	7.16136	7.10456
MBF1	O14467	Multiprotein-bridging factor 1 OS=Saccharomyces cerevisiae (strain ATCC 204508 / S288c) GN=MBF1 PE=1 SV=2	1	1	3	3	8	7.00893	33666900	19976800	30834800	56913100	61009700	57921500	28504700	49398300	39045800	3.497e+07	2.00871e+07	2.95229e+07	5.91159e+07	6.13464e+07	5.54571e+07	2.9608e+07	4.96709e+07	3.73845e+07	3.13917e+07	2.27673e+07	2.90164e+07	5.13429e+07	6.17049e+07	8.56623e+07	3.84622e+07	4.37773e+07	2.41981e+07	1	1	1	1.63555	2.71025	2.9522	1.22523	1.92282	0.833944
NGG1	P32494	Chromatin-remodeling complexes subunit NGG1 OS=Saccharomyces cerevisiae (strain ATCC 204508 / S288c) GN=NGG1 PE=1 SV=1	1	1	3	3	3	5.72702	723705	881617	726492	4471410	4685250	2738440	4739500	5021740	5972120	727465	801347	795133	4.49464e+06	4.25867e+06	2.99718e+06	4.76412e+06	4.56452e+06	6.53638e+06	653028	908271	781493	3.90365e+06	4.28355e+06	4.62961e+06	6.18883e+06	4.02292e+06	4.23084e+06	1	1	1	5.97776	4.71616	5.92406	9.47713	4.42921	5.41379
NHP2	P32495	H/ACA ribonucleoprotein complex subunit 2 OS=Saccharomyces cerevisiae (strain ATCC 204508 / S288c) GN=NHP2 PE=1 SV=2	1	1	3	3	3	6.37317	2388230	2145840	1798600	18255700	17510200	3673610	15745200	25996000	22709600	2.09758e+06	1.67565e+06	2.62244e+06	1.6034e+07	1.36734e+07	5.3563e+06	1.3829e+07	2.02998e+07	3.31117e+07	1.88295e+06	1.89923e+06	2.57746e+06	1.39257e+07	1.37533e+07	8.27365e+06	1.79646e+07	1.78912e+07	2.14324e+07	1	1	1	7.39568	7.24152	3.21	9.54065	9.42022	8.31531
NIP1	P32497	Eukaryotic translation initiation factor 3 subunit C OS=Saccharomyces cerevisiae (strain ATCC 204508 / S288c) GN=NIP1 PE=1 SV=2	1	1	3	3	4	6.16347	1025730	1356130	535108	6062810	4725300	3046670	3822590	6580540	6515270	999580	1.09172e+06	682100	5.90825e+06	3.80398e+06	3.88358e+06	3.72514e+06	5.29749e+06	8.30499e+06	897300	1.23738e+06	670399	5.13138e+06	3.82621e+06	5.9988e+06	4.83914e+06	4.66892e+06	5.37561e+06	1	1	1	5.71869	3.09217	8.9481	5.393	3.77322	8.01853
GLR1	P41921|P41921-2	Glutathione reductase OS=Saccharomyces cerevisiae (strain ATCC 204508 / S288c) GN=GLR1 PE=1 SV=2|Isoform 2 of Glutathione reductase OS=Saccharomyces cerevisiae (strain ATCC 204508 / S288c) GN=GLR1	1	1	3	3	3	5.38695	1098370	1249980	1027970	5449660	4827940	2261540	3485580	4310940	6329110	1.08279e+06	1.14486e+06	1.1385e+06	5.37238e+06	4.42193e+06	2.50471e+06	3.43615e+06	3.9484e+06	7.00964e+06	972000	1.29762e+06	1.11897e+06	4.66598e+06	4.44777e+06	3.86892e+06	4.46374e+06	3.47991e+06	4.53717e+06	1	1	1	4.80039	3.42764	3.45757	4.59232	2.68177	4.05477
RPL10	P41805	60S ribosomal protein L10 OS=Saccharomyces cerevisiae (strain ATCC 204508 / S288c) GN=RPL10 PE=1 SV=1	1	1	3	3	11	7.77554	10842700	49658600	29957300	178062000	198992000	35915000	70149300	91001500	128082000	1.34068e+07	3.26687e+07	3.6828e+07	2.2017e+08	1.3091e+08	4.41521e+07	8.67381e+07	5.98669e+07	1.57458e+08	1.2035e+07	3.70277e+07	3.61962e+07	1.9122e+08	1.31675e+08	6.81999e+07	1.12677e+08	5.27634e+07	1.01918e+08	1	1	1	15.8887	3.55613	1.88417	9.3625	1.42497	2.81572
VMA13	P41807	V-type proton ATPase subunit H OS=Saccharomyces cerevisiae (strain ATCC 204508 / S288c) GN=VMA13 PE=1 SV=1	1	1	3	3	2	5.55877	875739	662791	504925	3720020	2985740	1665440	1866180	2767550	3028490	785865	615838	605569	3.33825e+06	2.77423e+06	1.9974e+06	1.67466e+06	2.57149e+06	3.63215e+06	705453	698009	595181	2.89931e+06	2.79044e+06	3.08531e+06	2.17547e+06	2.26637e+06	2.351e+06	1	1	1	4.10985	3.99771	5.18381	3.08379	3.24691	3.95005
SRO9	P25567	RNA-binding protein SRO9 OS=Saccharomyces cerevisiae (strain ATCC 204508 / S288c) GN=SRO9 PE=1 SV=2	1	1	3	3	5	6.1018	1698440	1362460	1078470	15882100	15462600	5004260	3002080	4051580	4469440	1.4933e+06	1.17707e+06	1.41981e+06	1.39638e+07	1.33586e+07	6.58814e+06	2.63948e+06	3.50029e+06	5.88405e+06	1.3405e+06	1.33413e+06	1.39546e+06	1.21278e+07	1.34367e+07	1.01764e+07	3.42882e+06	3.08497e+06	3.8086e+06	1	1	1	9.04719	10.0715	7.29254	2.55787	2.31235	2.72928
APL2	P36000	AP-1 complex subunit beta-1 OS=Saccharomyces cerevisiae (strain ATCC 204508 / S288c) GN=APL2 PE=1 SV=1	1	1	3	3	2	5.57637	501642	233157	311742	2293960	2395240	1071460	2142440	4028280	2875820	447189	214290	380491	2.04495e+06	2.20142e+06	1.30775e+06	1.90988e+06	3.70232e+06	3.51003e+06	401431	242883	373964	1.77606e+06	2.21429e+06	2.02003e+06	2.48103e+06	3.26302e+06	2.27195e+06	1	1	1	4.42433	9.11668	5.40166	6.18046	13.4346	6.07533
MYO3	P36006	Myosin-3 OS=Saccharomyces cerevisiae (strain ATCC 204508 / S288c) GN=MYO3 PE=1 SV=4	1	1	3	3	4	6.0429	1034380	1614910	1487570	15474500	12614000	4886680	6080000	12551900	9881750	1.11337e+06	1.25971e+06	1.77172e+06	1.66562e+07	9.83956e+06	5.82012e+06	6.5443e+06	9.79112e+06	1.17693e+07	999447	1.42779e+06	1.74133e+06	1.44661e+07	9.89705e+06	8.99009e+06	8.50137e+06	8.62936e+06	7.618e+06	1	1	1	14.4741	6.93171	5.16278	8.50608	6.04384	4.37482
TEF4	P36008	Elongation factor 1-gamma 2 OS=Saccharomyces cerevisiae (strain ATCC 204508 / S288c) GN=TEF4 PE=1 SV=1	1	1	3	3	5	6.8212	5960950	4958730	3835470	40536000	43803300	19564800	41290700	61826500	55593900	5.59213e+06	4.21326e+06	4.81182e+06	3.80279e+07	3.72181e+07	2.45452e+07	3.87359e+07	5.25318e+07	6.97458e+07	5.01993e+06	4.77543e+06	4.72928e+06	3.30277e+07	3.74356e+07	3.79139e+07	5.03199e+07	4.62987e+07	4.51447e+07	1	1	1	6.57932	7.83921	8.01685	10.024	9.69519	9.5458
GPH1	P06738	Glycogen phosphorylase OS=Saccharomyces cerevisiae (strain ATCC 204508 / S288c) GN=GPH1 PE=1 SV=4	1	1	3	3	9	6.71018	9150260	5177780	6315760	28592400	24202300	14178700	15956100	21938100	29022000	8.28719e+06	5.38999e+06	6.69895e+06	2.58955e+07	2.51942e+07	1.5039e+07	1.44511e+07	2.28372e+07	3.07828e+07	7.43922e+06	6.10918e+06	6.58404e+06	2.24906e+07	2.53415e+07	2.323e+07	1.87727e+07	2.01275e+07	1.9925e+07	1	1	1	3.02324	4.1481	3.52824	2.52348	3.29464	3.02625
MGA2	P40578	Protein MGA2 OS=Saccharomyces cerevisiae (strain ATCC 204508 / S288c) GN=MGA2 PE=1 SV=1	1	1	3	3	2	6.48033	491922	505913	384547	1587890	2377250	756507	1614690	4679870	3188910	561370	350673	486149	1.81206e+06	1.64779e+06	956386	1.84265e+06	3.24385e+06	4.03146e+06	503929	397463	477810	1.5738e+06	1.65742e+06	1.47729e+06	2.39369e+06	2.85895e+06	2.60947e+06	1	1	1	3.12306	4.16999	3.09179	4.75006	7.193	5.46131
PET9	P18239	ADP,ATP carrier protein 2 OS=Saccharomyces cerevisiae (strain ATCC 204508 / S288c) GN=PET9 PE=1 SV=2	1	1	3	3	3	7.19958	3577990	1978110	1541830	19991000	16747300	10934400	11323900	14859400	16379900	3.00389e+06	1.96059e+06	1.85292e+06	1.67834e+07	1.65989e+07	1.31406e+07	9.50693e+06	1.47278e+07	1.96848e+07	2.69652e+06	2.22219e+06	1.82113e+06	1.45766e+07	1.66959e+07	2.02977e+07	1.235e+07	1.29803e+07	1.27415e+07	1	1	1	5.40569	7.51329	11.1456	4.57997	5.84121	6.99646
ZEO1	Q08245	Protein ZEO1 OS=Saccharomyces cerevisiae (strain ATCC 204508 / S288c) GN=ZEO1 PE=1 SV=3	1	1	3	3	2	6.13518	6038080	3772330	1976620	2831080	2604620	1768260	3167570	5426200	4402710	5.24133e+06	3.29151e+06	2.60973e+06	2.45751e+06	2.27263e+06	2.33463e+06	2.7496e+06	4.73458e+06	5.81289e+06	4.70502e+06	3.73069e+06	2.56496e+06	2.13438e+06	2.28591e+06	3.60621e+06	3.57186e+06	4.1728e+06	3.76254e+06	1	1	1	0.453638	0.612732	1.40595	0.75916	1.11851	1.4669
VID30	P53076	Vacuolar import and degradation protein 30 OS=Saccharomyces cerevisiae (strain ATCC 204508 / S288c) GN=VID30 PE=1 SV=1	1	1	3	3	2	5.74816	1406740	14698800	1174260	5033410	5060660	3330480	2812510	4134430	5187510	1.91069e+06	8.01704e+06	1.58509e+06	6.83659e+06	2.76019e+06	4.4957e+06	3.82007e+06	2.25501e+06	7.00244e+06	1.71519e+06	9.08675e+06	1.5579e+06	5.93766e+06	2.77632e+06	6.94432e+06	4.96246e+06	1.98744e+06	4.53251e+06	1	1	1	3.46182	0.305535	4.45748	2.89325	0.218719	2.90937
SHE10	P53075	Outer spore wall assembly protein SHE10 OS=Saccharomyces cerevisiae (strain ATCC 204508 / S288c) GN=SHE10 PE=1 SV=1	1	1	3	3	2	5.95083	760798	10072900	1234820	7470090	6187230	1911750	8963090	15894900	12811200	998428	4.91568e+06	1.92809e+06	9.80332e+06	3.01943e+06	2.98507e+06	1.17627e+07	7.75687e+06	2.00038e+07	896266	5.57157e+06	1.89502e+06	8.5143e+06	3.03708e+06	4.61091e+06	1.52803e+07	6.83649e+06	1.2948e+07	1	1	1	9.49975	0.545102	2.43318	17.0488	1.22703	6.83266
IPP1	P00817	Inorganic pyrophosphatase OS=Saccharomyces cerevisiae (strain ATCC 204508 / S288c) GN=IPP1 PE=1 SV=4	1	1	3	3	2	5.92746	808636	859157	776692	4520820	4718240	2919800	2154860	3318980	4775160	889075	790257	768011	4.97053e+06	4.33986e+06	2.88717e+06	2.36921e+06	3.05282e+06	4.72179e+06	798102	895701	754836	4.31696e+06	4.36522e+06	4.45968e+06	3.07773e+06	2.69059e+06	3.0563e+06	1	1	1	5.40904	4.87353	5.90814	3.85631	3.00389	4.04895
TDH1	P00360	Glyceraldehyde-3-phosphate dehydrogenase 1 OS=Saccharomyces cerevisiae (strain ATCC 204508 / S288c) GN=TDH1 PE=1 SV=3	1	1	3	3	4	6.18776	4278650	2550360	2535310	17493900	12404000	5964650	3749310	17420000	5732840	4.04749e+06	1.9266e+06	3.54783e+06	1.65488e+07	9.37026e+06	8.34673e+06	3.54675e+06	1.31595e+07	8.02235e+06	3.63334e+06	2.18366e+06	3.48697e+06	1.43728e+07	9.42501e+06	1.28928e+07	4.6074e+06	1.1598e+07	5.19267e+06	1	1	1	3.95581	4.31615	3.69744	1.26809	5.31127	1.48916
CAR1	P00812	Arginase OS=Saccharomyces cerevisiae (strain ATCC 204508 / S288c) GN=CAR1 PE=1 SV=1	1	1	3	3	3	6.31943	8266850	5181890	2451970	8684720	10787300	8203570	4208420	6744930	8330080	7.93552e+06	4.62029e+06	2.86483e+06	8.33664e+06	9.61819e+06	9.58489e+06	4.03975e+06	6.01393e+06	9.7327e+06	7.12353e+06	5.23677e+06	2.81569e+06	7.24047e+06	9.67439e+06	1.48054e+07	5.24783e+06	5.30035e+06	6.29974e+06	1	1	1	1.01642	1.8474	5.25817	0.73669	1.01214	2.23737
PIL1	P53252	Sphingolipid long chain base-responsive protein PIL1 OS=Saccharomyces cerevisiae (strain ATCC 204508 / S288c) GN=PIL1 PE=1 SV=1	1	1	3	3	4	6.64226	1854310	1575030	1549040	18385700	14584500	9083560	8091160	13350300	13363900	1.79805e+06	1.47427e+06	1.7067e+06	1.78279e+07	1.36514e+07	1.00081e+07	7.84568e+06	1.24962e+07	1.4724e+07	1.61407e+06	1.67098e+06	1.67742e+06	1.54837e+07	1.37312e+07	1.5459e+07	1.01919e+07	1.10135e+07	9.5305e+06	1	1	1	9.59298	8.21748	9.21595	6.31443	6.59104	5.68165
RPS1B	P23248	40S ribosomal protein S1-B OS=Saccharomyces cerevisiae (strain ATCC 204508 / S288c) GN=RPS1B PE=1 SV=3	1	1	3	3	2	6.50204	371385	267259	256827	2784070	2573450	350265	925004	1783950	1921900	315720	209098	386141	2.36678e+06	2.01341e+06	526625	786361	1.39573e+06	2.88959e+06	283415	236998	379517	2.05558e+06	2.02518e+06	813455	1.02152e+06	1.23012e+06	1.87036e+06	1	1	1	7.2529	8.54514	2.1434	3.60433	5.19042	4.92826
HOP1	P20050	Meiosis-specific protein HOP1 OS=Saccharomyces cerevisiae (strain ATCC 204508 / S288c) GN=HOP1 PE=1 SV=2	1	1	3	3	12	8.04328	8428890	11818800	11122800	266708000	157243000	76051200	90210200	162397000	146325000	8.33931e+06	1.02419e+07	1.29732e+07	2.63873e+08	1.36263e+08	8.87034e+07	8.92515e+07	1.40729e+08	1.70668e+08	7.48601e+06	1.16084e+07	1.27507e+07	2.29177e+08	1.37059e+08	1.37016e+08	1.15942e+08	1.24031e+08	1.10469e+08	1	1	1	30.6141	11.8068	10.7458	15.4878	10.6846	8.66379
MRPS5	P33759	37S ribosomal protein S5, mitochondrial OS=Saccharomyces cerevisiae (strain ATCC 204508 / S288c) GN=MRPS5 PE=1 SV=1	1	1	3	3	2	6.26726	269108	243255	220446	6193500	5925730	2057140	2443170	2846450	2898450	237535	214173	283660	5.46685e+06	5.2173e+06	2.64703e+06	2.15652e+06	2.50615e+06	3.72959e+06	213230	242750	278794	4.74802e+06	5.24778e+06	4.08876e+06	2.80143e+06	2.20879e+06	2.41407e+06	1	1	1	22.2672	21.618	14.6659	13.1381	9.099	8.65899
RTS2	P40962	Zinc finger protein RTS2 OS=Saccharomyces cerevisiae (strain ATCC 204508 / S288c) GN=RTS2 PE=1 SV=1	1	1	3	3	2	5.68878	716362	451636	549279	2922440	3237720	1034200	2564600	4569250	3753140	662397	388254	691004	2.70228e+06	2.78334e+06	1.30104e+06	2.3714e+06	3.92801e+06	4.72152e+06	594618	440058	679150	2.34697e+06	2.79961e+06	2.00967e+06	3.08057e+06	3.46193e+06	3.05613e+06	1	1	1	3.94702	6.3619	2.95909	5.18075	7.86699	4.49993
NUP145	P49687	Nucleoporin NUP145 OS=Saccharomyces cerevisiae (strain ATCC 204508 / S288c) GN=NUP145 PE=1 SV=1	1	1	3	3	2	5.88873	545749	566742	295210	2185470	2142070	860990	1366400	2743360	2408770	529952	433678	397288	2.12221e+06	1.63914e+06	1.1587e+06	1.32685e+06	2.09925e+06	3.24168e+06	475726	491543	390473	1.84317e+06	1.64872e+06	1.7898e+06	1.72364e+06	1.85017e+06	2.09826e+06	1	1	1	3.87443	3.35416	4.58368	3.62319	3.764	5.37363
TMA19	P35691	Translationally-controlled tumor protein homolog OS=Saccharomyces cerevisiae (strain ATCC 204508 / S288c) GN=TMA19 PE=1 SV=1	1	1	3	3	2	5.73017	598541	575622	463072	3530400	3750900	1764000	1931630	2715090	3839220	605125	515803	511153	3.56924e+06	3.3611e+06	1.94716e+06	1.95288e+06	2.43294e+06	4.23785e+06	543207	584626	502384	3.09993e+06	3.38074e+06	3.00769e+06	2.53689e+06	2.14426e+06	2.74305e+06	1	1	1	5.70671	5.78274	5.98683	4.6702	3.66774	5.46007
NAM9	P27929	37S ribosomal protein NAM9, mitochondrial OS=Saccharomyces cerevisiae (strain ATCC 204508 / S288c) GN=NAM9 PE=1 SV=2	1	1	3	3	2	5.82461	261137	221755	166448	5384220	5082240	1224420	2792110	3675820	3655980	218411	182177	242245	4.50327e+06	4.17517e+06	1.78199e+06	2.33527e+06	3.01977e+06	5.32083e+06	196062	206484	238089	3.91115e+06	4.19957e+06	2.75257e+06	3.03364e+06	2.66146e+06	3.44404e+06	1	1	1	19.9485	20.3384	11.5611	15.4728	12.8894	14.4653
HSP150	P32478	Cell wall mannoprotein HSP150 OS=Saccharomyces cerevisiae (strain ATCC 204508 / S288c) GN=HSP150 PE=1 SV=2	1	1	3	3	2	6.48953	1260670	1470370	946219	26290300	8028920	6287610	2538020	1549600	2240990	867150	1.68183e+06	1.20266e+06	1.80837e+07	9.1836e+06	7.99166e+06	1.74577e+06	1.77246e+06	2.84834e+06	778421	1.90624e+06	1.18203e+06	1.5706e+07	9.23726e+06	1.23444e+07	2.26785e+06	1.56215e+06	1.84366e+06	1	1	1	20.1767	4.84581	10.4434	2.9134	0.819492	1.55974
HIR1	P32479	Protein HIR1 OS=Saccharomyces cerevisiae (strain ATCC 204508 / S288c) GN=HIR1 PE=1 SV=3	1	1	3	3	5	6.13171	3079610	12642000	2777960	14195400	11399000	4496800	17210600	20816800	20583700	3.18732e+06	8.25138e+06	4.1123e+06	1.46919e+07	7.44008e+06	6.65675e+06	1.78126e+07	1.3587e+07	3.04707e+07	2.86118e+06	9.35236e+06	4.04176e+06	1.27601e+07	7.48356e+06	1.02824e+07	2.31394e+07	1.19749e+07	1.97229e+07	1	1	1	4.45972	0.800179	2.54404	8.08735	1.28041	4.87979
PDB1	P32473	Pyruvate dehydrogenase E1 component subunit beta, mitochondrial OS=Saccharomyces cerevisiae (strain ATCC 204508 / S288c) GN=PDB1 PE=1 SV=2	1	1	3	3	3	6.23956	2913840	2040880	1863150	5585760	6224870	4347770	3918320	5217310	5655090	2.82072e+06	1.95043e+06	2.01391e+06	5.40726e+06	5.94898e+06	4.69958e+06	3.7931e+06	4.98608e+06	6.11269e+06	2.5321e+06	2.21067e+06	1.97937e+06	4.69627e+06	5.98375e+06	7.25925e+06	4.92743e+06	4.39446e+06	3.95659e+06	1	1	1	1.85469	2.70675	3.66746	1.94599	1.98784	1.99892
RML2	P32611	54S ribosomal protein RML2, mitochondrial OS=Saccharomyces cerevisiae (strain ATCC 204508 / S288c) GN=RML2 PE=1 SV=1	1	1	3	3	4	6.80724	838149	944045	1002410	18589600	17739400	2491040	9632280	14090000	13388200	745922	722533	1.47166e+06	1.65441e+07	1.3577e+07	3.65716e+06	8.57238e+06	1.07839e+07	1.96555e+07	669597	818940	1.44642e+06	1.43687e+07	1.36563e+07	5.64906e+06	1.11359e+07	9.50435e+06	1.27226e+07	1	1	1	21.4588	16.6756	3.90555	16.6308	11.6057	8.7959
ADE13	Q05911	Adenylosuccinate lyase OS=Saccharomyces cerevisiae (strain ATCC 204508 / S288c) GN=ADE13 PE=1 SV=1	1	1	3	3	7	6.2105	4945030	3605570	3055160	23734700	17777100	12594600	16717900	21788000	30656900	4.49993e+06	3.67484e+06	3.29407e+06	2.15983e+07	1.81186e+07	1.35795e+07	1.52131e+07	2.22066e+07	3.30543e+07	4.03948e+06	4.16517e+06	3.23757e+06	1.87584e+07	1.82245e+07	2.09757e+07	1.97626e+07	1.95717e+07	2.13952e+07	1	1	1	4.64377	4.37545	6.47884	4.89236	4.69889	6.60842
ARE2	P53629	Sterol O-acyltransferase 2 OS=Saccharomyces cerevisiae (strain ATCC 204508 / S288c) GN=ARE2 PE=1 SV=1	1	1	3	3	2	5.83183	844984	907347	667699	3532300	3831490	1882740	2334390	5253910	3466340	892699	695208	824865	3.73176e+06	2.93568e+06	2.32591e+06	2.46621e+06	4.02554e+06	4.28226e+06	801355	787970	810715	3.24108e+06	2.95284e+06	3.59273e+06	3.20373e+06	3.54789e+06	2.7718e+06	1	1	1	4.0445	3.7474	4.43156	3.99789	4.50258	3.41896
COP1	P53622	Coatomer subunit alpha OS=Saccharomyces cerevisiae (strain ATCC 204508 / S288c) GN=COP1 PE=1 SV=2	1	1	3	3	5	5.94089	1737010	2210840	1812630	7460710	7677440	3965450	4440970	7877290	7721470	1.89989e+06	1.8258e+06	2.00672e+06	8.1603e+06	6.34033e+06	4.39007e+06	4.8574e+06	6.50538e+06	8.54828e+06	1.70549e+06	2.06941e+06	1.9723e+06	7.08731e+06	6.37738e+06	6.78115e+06	6.31e+06	5.73349e+06	5.53309e+06	1	1	1	4.1556	3.08173	3.43819	3.69983	2.77059	2.8054
VMA2	P16140	V-type proton ATPase subunit B OS=Saccharomyces cerevisiae (strain ATCC 204508 / S288c) GN=VMA2 PE=1 SV=2	1	1	3	3	6	6.62243	3251160	1849370	1668870	21418400	16721200	9169920	10393900	21610600	16285200	2.86248e+06	1.67215e+06	2.09637e+06	1.88578e+07	1.51189e+07	1.15189e+07	9.15128e+06	1.95397e+07	2.04568e+07	2.56958e+06	1.89527e+06	2.0604e+06	1.63782e+07	1.52072e+07	1.77927e+07	1.1888e+07	1.72213e+07	1.32412e+07	1	1	1	6.37389	8.02379	8.63555	4.62643	9.08647	6.4265
DOT5	P40553	Peroxiredoxin DOT5 OS=Saccharomyces cerevisiae (strain ATCC 204508 / S288c) GN=DOT5 PE=1 SV=1	1	1	3	3	5	6.42744	3971510	2492620	1935820	21513900	24408600	6700220	16066700	22055900	18027500	3.25421e+06	2.05797e+06	2.86149e+06	1.76282e+07	2.01523e+07	9.90413e+06	1.31649e+07	1.82099e+07	2.66479e+07	2.92123e+06	2.33256e+06	2.8124e+06	1.53103e+07	2.02701e+07	1.52985e+07	1.71018e+07	1.60492e+07	1.72485e+07	1	1	1	5.24106	8.69006	5.43965	5.85432	6.88051	6.13302
SLI15	P38283	Inner centromere protein-related protein SLI15 OS=Saccharomyces cerevisiae (strain ATCC 204508 / S288c) GN=SLI15 PE=1 SV=1	1	1	3	3	2	6.06142	1494320	1112170	1194180	6442120	4980400	3826760	3390940	5744310	5531910	1.44835e+06	1.08719e+06	1.26039e+06	6.24393e+06	4.86855e+06	4.03893e+06	3.28662e+06	5.61531e+06	5.83862e+06	1.30015e+06	1.23226e+06	1.23877e+06	5.42293e+06	4.897e+06	6.23876e+06	4.26948e+06	4.94903e+06	3.77919e+06	1	1	1	4.17101	3.97401	5.03626	3.28384	4.01623	3.05077
HAS1	Q03532	ATP-dependent RNA helicase HAS1 OS=Saccharomyces cerevisiae (strain ATCC 204508 / S288c) GN=HAS1 PE=1 SV=1	1	1	3	3	7	6.09171	3096480	2913870	1876880	19995000	19912600	7538510	9854760	17367500	16148800	2.9355e+06	2.33696e+06	2.46855e+06	1.89555e+07	1.59701e+07	9.91495e+06	9.34243e+06	1.39289e+07	2.12396e+07	2.63513e+06	2.64878e+06	2.4262e+06	1.64631e+07	1.60635e+07	1.53152e+07	1.21363e+07	1.22762e+07	1.37478e+07	1	1	1	6.24754	6.06448	6.31242	4.60557	4.63467	5.6664
YPT1	P01123	GTP-binding protein YPT1 OS=Saccharomyces cerevisiae (strain ATCC 204508 / S288c) GN=YPT1 PE=1 SV=2	1	1	3	3	5	6.5017	12887200	5767530	4272730	18572500	17284000	14725800	13326000	25505200	19443300	1.12973e+07	5.45293e+06	5.15523e+06	1.62813e+07	1.63412e+07	1.77673e+07	1.1682e+07	2.4114e+07	2.34592e+07	1.01414e+07	6.18051e+06	5.0668e+06	1.41405e+07	1.64367e+07	2.74444e+07	1.51755e+07	2.12527e+07	1.51845e+07	1	1	1	1.39434	2.65944	5.41652	1.4964	3.43867	2.99687
RAS2	P01120	Ras-like protein 2 OS=Saccharomyces cerevisiae (strain ATCC 204508 / S288c) GN=RAS2 PE=1 SV=4	1	1	3	3	4	5.80414	2120280	944213	1552590	3784640	3129390	1929560	2853520	4675090	3956010	1.86306e+06	981889	1.69915e+06	3.3255e+06	3.25426e+06	2.1117e+06	2.50734e+06	4.86164e+06	4.32944e+06	1.67242e+06	1.1129e+06	1.67e+06	2.88824e+06	3.27328e+06	3.26186e+06	3.25716e+06	4.28478e+06	2.80234e+06	1	1	1	1.72698	2.94121	1.95321	1.94757	3.8501	1.67805
ATP2	P00830	ATP synthase subunit beta, mitochondrial OS=Saccharomyces cerevisiae (strain ATCC 204508 / S288c) GN=ATP2 PE=1 SV=2	1	1	3	3	7	7.12508	8315420	5597230	4598310	38140200	27140800	21197000	18666300	28245200	31926100	7.46996e+06	5.59761e+06	5.11841e+06	3.42624e+07	2.71426e+07	2.35945e+07	1.67684e+07	2.82471e+07	3.55371e+07	6.70561e+06	6.34449e+06	5.03061e+06	2.97573e+07	2.73012e+07	3.64454e+07	2.1783e+07	2.48955e+07	2.30023e+07	1	1	1	4.43767	4.30314	7.24474	3.24848	3.92395	4.57247
UGP1	P32861	UTP--glucose-1-phosphate uridylyltransferase OS=Saccharomyces cerevisiae (strain ATCC 204508 / S288c) GN=UGP1 PE=1 SV=1	1	1	3	3	6	6.79478	5555040	4480520	4112280	42253800	30644500	16724900	23882200	37831700	42102200	5.11841e+06	4.23454e+06	4.72233e+06	3.89326e+07	2.89622e+07	1.9206e+07	2.20051e+07	3.57548e+07	4.8348e+07	4.59468e+06	4.79956e+06	4.64132e+06	3.38135e+07	2.91314e+07	2.96667e+07	2.85857e+07	3.15123e+07	3.12945e+07	1	1	1	7.35926	6.0696	6.39187	6.22147	6.56568	6.74257
SSO1	P32867	Protein SSO1 OS=Saccharomyces cerevisiae (strain ATCC 204508 / S288c) GN=SSO1 PE=1 SV=2	1	1	3	3	2	5.87225	9162120	4299080	1728360	4942070	4176670	3328300	3194480	5067820	4931280	7.26143e+06	3.97644e+06	2.35771e+06	3.91683e+06	3.86321e+06	4.54023e+06	2.53178e+06	4.68748e+06	6.7269e+06	6.51841e+06	4.50701e+06	2.31726e+06	3.40181e+06	3.88579e+06	7.0131e+06	3.28891e+06	4.1313e+06	4.35416e+06	1	1	1	0.521878	0.862165	3.02646	0.504557	0.916638	1.87901
RPL37A	P49166	60S ribosomal protein L37-A OS=Saccharomyces cerevisiae (strain ATCC 204508 / S288c) GN=RPL37A PE=1 SV=2	1	1	3	3	2	6.64721	776088	855522	660242	10831800	10584800	1469080	7378080	7547310	9467790	634485	677160	1.02031e+06	8.85546e+06	8.37804e+06	2.27026e+06	6.03189e+06	5.97382e+06	1.46311e+07	569563	767513	1.00281e+06	7.69107e+06	8.427e+06	3.50677e+06	7.83573e+06	5.265e+06	9.47038e+06	1	1	1	13.5035	10.9796	3.49695	13.7575	6.85982	9.44385
EIS1	Q05050	Eisosome protein 1 OS=Saccharomyces cerevisiae (strain ATCC 204508 / S288c) GN=EIS1 PE=1 SV=1	1	1	3	3	5	6.04889	2575230	3041840	2076370	11638300	8896630	6302540	6600930	8705530	9705130	2.49951e+06	2.78544e+06	2.33619e+06	1.12961e+07	8.14673e+06	7.09118e+06	6.40685e+06	7.97173e+06	1.09195e+07	2.24376e+06	3.1571e+06	2.29611e+06	9.81082e+06	8.19433e+06	1.09534e+07	8.32282e+06	7.02586e+06	7.06795e+06	1	1	1	4.37249	2.59552	4.77043	3.70933	2.22541	3.07822
ABF1	P14164	ARS-binding factor 1 OS=Saccharomyces cerevisiae (strain ATCC 204508 / S288c) GN=ABF1 PE=1 SV=4	1	1	3	3	7	6.64329	5164590	5310030	3370470	31348800	22151600	8460230	22304200	32583900	28619100	4.40698e+06	4.44203e+06	4.72172e+06	2.67501e+07	1.85306e+07	1.1852e+07	1.90323e+07	2.72576e+07	4.00928e+07	3.95604e+06	5.03473e+06	4.64073e+06	2.32328e+07	1.86389e+07	1.83073e+07	2.47239e+07	2.40234e+07	2.59511e+07	1	1	1	5.87274	3.70207	3.94492	6.24966	4.77153	5.59203
GLN1	P32288	Glutamine synthetase OS=Saccharomyces cerevisiae (strain ATCC 204508 / S288c) GN=GLN1 PE=1 SV=4	1	1	3	3	3	6.18833	1909360	1506140	1120030	8547420	6607930	3704440	4999710	4772060	7225990	1.60864e+06	1.51978e+06	1.31747e+06	7.20124e+06	6.66778e+06	4.35747e+06	4.21228e+06	4.81528e+06	8.49981e+06	1.44404e+06	1.72257e+06	1.29487e+06	6.25436e+06	6.70675e+06	6.7308e+06	5.47196e+06	4.24393e+06	5.50172e+06	1	1	1	4.33115	3.89346	5.19804	3.78933	2.46373	4.24885
RPL20A|RPL20B	P0CX23|P0CX24	60S ribosomal protein L20-A OS=Saccharomyces cerevisiae (strain ATCC 204508 / S288c) GN=RPL20A PE=1 SV=1|60S ribosomal protein L20-B OS=Saccharomyces cerevisiae (strain ATCC 204508 / S288c) GN=RPL20B PE=1 SV=1	1	1	3	3	7	7.16083	8161490	7107920	5585920	68183400	82589100	20701500	30618700	43278800	44505400	7.46927e+06	5.69398e+06	7.61925e+06	6.24004e+07	6.61601e+07	2.8237e+07	2.80218e+07	3.46696e+07	6.07058e+07	6.70499e+06	6.45373e+06	7.48855e+06	5.41955e+07	6.65467e+07	4.36166e+07	3.64017e+07	3.05559e+07	3.92934e+07	1	1	1	8.08286	10.3114	5.82444	5.42904	4.73462	5.24713
RPL43A|RPL43B	P0CX25|P0CX26	60S ribosomal protein L43-A OS=Saccharomyces cerevisiae (strain ATCC 204508 / S288c) GN=RPL43A PE=1 SV=1|60S ribosomal protein L43-B OS=Saccharomyces cerevisiae (strain ATCC 204508 / S288c) GN=RPL43B PE=1 SV=1	1	1	3	3	4	7.54902	3486760	4666280	3550700	67082500	65398800	14460000	24753700	37419100	37536000	3.32746e+06	3.55092e+06	4.88936e+06	6.40178e+07	4.97669e+07	1.99116e+07	2.36228e+07	2.8475e+07	5.16876e+07	2.98699e+06	4.02472e+06	4.80549e+06	5.56002e+07	5.00577e+07	3.07566e+07	3.06872e+07	2.50963e+07	3.34561e+07	1	1	1	18.6141	12.4376	6.40031	10.2736	6.23555	6.96206
RPL42A|RPL42B	P0CX27|P0CX28	60S ribosomal protein L42-A OS=Saccharomyces cerevisiae (strain ATCC 204508 / S288c) GN=RPL42A PE=1 SV=1|60S ribosomal protein L42-B OS=Saccharomyces cerevisiae (strain ATCC 204508 / S288c) GN=RPL42B PE=1 SV=1	1	1	3	3	3	7.94731	2543120	4449220	3139950	85002400	89559900	11171700	39730800	46285400	52281000	2.33207e+06	3.16243e+06	4.81738e+06	7.79483e+07	6.36576e+07	1.71399e+07	3.64336e+07	3.28988e+07	8.02107e+07	2.09345e+06	3.58439e+06	4.73474e+06	6.7699e+07	6.40295e+07	2.64752e+07	4.73291e+07	2.89953e+07	5.19184e+07	1	1	1	32.3385	17.8635	5.59169	22.6082	8.08932	10.9654
SMY2	P32909	Protein SMY2 OS=Saccharomyces cerevisiae (strain ATCC 204508 / S288c) GN=SMY2 PE=1 SV=2	1	1	3	3	6	6.24637	4931260	3973850	4918910	28472100	28943500	8159230	15965500	29925100	19895700	4.6115e+06	3.22119e+06	6.48904e+06	2.66258e+07	2.34615e+07	1.07637e+07	1.49302e+07	2.42572e+07	2.62465e+07	4.13963e+06	3.65099e+06	6.37773e+06	2.31249e+07	2.35986e+07	1.66262e+07	1.93951e+07	2.1379e+07	1.69887e+07	1	1	1	5.58621	6.46362	2.60692	4.68522	5.85566	2.66375
ADE3	P07245	C-1-tetrahydrofolate synthase, cytoplasmic OS=Saccharomyces cerevisiae (strain ATCC 204508 / S288c) GN=ADE3 PE=1 SV=1	1	1	3	3	8	6.64115	3785310	2124350	1854300	14526100	20437500	12799200	8566740	15272600	13399300	3.76395e+06	1.88481e+06	2.10182e+06	1.44441e+07	1.8133e+07	1.45077e+07	8.51839e+06	1.35505e+07	1.51879e+07	3.37881e+06	2.1363e+06	2.06577e+06	1.25449e+07	1.8239e+07	2.24094e+07	1.10658e+07	1.19427e+07	9.83076e+06	1	1	1	3.71282	8.53764	10.848	3.27507	5.59035	4.75889
ADE5,7	P07244	Bifunctional purine biosynthetic protein ADE5,7 OS=Saccharomyces cerevisiae (strain ATCC 204508 / S288c) GN=ADE5,7 PE=1 SV=1	1	1	3	3	5	5.98005	4477690	3133290	2202630	17403500	12126300	7625970	8907700	12481400	13825500	3.80042e+06	3.01948e+06	2.69297e+06	1.47711e+07	1.16859e+07	9.32364e+06	7.56037e+06	1.20281e+07	1.69033e+07	3.41155e+06	3.42237e+06	2.64678e+06	1.28289e+07	1.17541e+07	1.44018e+07	9.8213e+06	1.06009e+07	1.09411e+07	1	1	1	3.76044	3.4345	5.44127	2.87884	3.09752	4.13374
ADH3	P07246	Alcohol dehydrogenase 3, mitochondrial OS=Saccharomyces cerevisiae (strain ATCC 204508 / S288c) GN=ADH3 PE=1 SV=2	1	1	3	3	7	6.47823	4170160	2634570	2395330	24247900	21065400	12803100	15879500	32373100	25094200	3.89121e+06	2.36797e+06	2.85606e+06	2.26259e+07	1.89337e+07	1.52657e+07	1.48173e+07	2.90971e+07	2.9921e+07	3.49305e+06	2.68392e+06	2.80707e+06	1.96509e+07	1.90443e+07	2.35803e+07	1.92484e+07	2.56446e+07	1.93671e+07	1	1	1	5.62571	7.09571	8.40034	5.51049	9.55491	6.89941
SMC6	Q12749	Structural maintenance of chromosomes protein 6 OS=Saccharomyces cerevisiae (strain ATCC 204508 / S288c) GN=SMC6 PE=1 SV=1	1	1	3	3	2	5.66169	977343	855635	731301	4375550	5107320	2717470	3090770	10433900	5206660	1.09141e+06	632364	886090	4.88621e+06	3.77461e+06	3.29266e+06	3.45149e+06	7.71126e+06	6.30871e+06	979730	716740	870890	4.24373e+06	3.79667e+06	5.08603e+06	4.48365e+06	6.79629e+06	4.08348e+06	1	1	1	4.33153	5.29713	5.84003	4.57642	9.48222	4.68885
ISW1	P38144	ISWI chromatin-remodeling complex ATPase ISW1 OS=Saccharomyces cerevisiae (strain ATCC 204508 / S288c) GN=ISW1 PE=1 SV=2	1	1	3	3	18	7.37807	6268520	10055500	5081270	70291500	77673000	11920900	107257000	199099000	141250000	5.9179e+06	6.38249e+06	8.47975e+06	6.63599e+07	4.93011e+07	1.98939e+07	1.01258e+08	1.26373e+08	2.35722e+08	5.31237e+06	7.2341e+06	8.33429e+06	5.76344e+07	4.95892e+07	3.07293e+07	1.31539e+08	1.11379e+08	1.52577e+08	1	1	1	10.8491	6.85492	3.68709	24.7609	15.3963	18.3071
NAM7	P30771	ATP-dependent helicase NAM7 OS=Saccharomyces cerevisiae (strain ATCC 204508 / S288c) GN=NAM7 PE=1 SV=1	1	1	3	3	3	5.72796	1735450	783290	603273	4553530	4294720	1825670	3355520	5183470	4086090	1.36019e+06	705976	854003	3.56891e+06	3.87082e+06	2.58445e+06	2.62995e+06	4.67184e+06	5.78434e+06	1.22101e+06	800174	839354	3.09964e+06	3.89343e+06	3.99209e+06	3.41643e+06	4.11751e+06	3.74406e+06	1	1	1	2.53859	4.86573	4.75615	2.79804	5.14577	4.46065
BRF1	P29056	Transcription factor IIIB 70 kDa subunit OS=Saccharomyces cerevisiae (strain ATCC 204508 / S288c) GN=BRF1 PE=1 SV=1	1	1	3	3	7	6.67968	1265340	1607430	1463390	13725200	11914400	1778800	22871200	26025600	28952300	1.07884e+06	1.27063e+06	2.17132e+06	1.17022e+07	9.41799e+06	2.63932e+06	1.95002e+07	2.05725e+07	4.29583e+07	968449	1.44017e+06	2.13408e+06	1.01635e+07	9.47302e+06	4.07684e+06	2.53317e+07	1.81315e+07	2.78059e+07	1	1	1	10.4946	6.57773	1.91035	26.157	12.5899	13.0295
BDF1	P35817	Bromodomain-containing factor 1 OS=Saccharomyces cerevisiae (strain ATCC 204508 / S288c) GN=BDF1 PE=1 SV=3	1	1	3	3	6	5.91174	2385310	2538720	2303020	11126100	12048800	5352200	12788100	18873600	16655900	2.3929e+06	2.13348e+06	2.73177e+06	1.11615e+07	1.01255e+07	6.3486e+06	1.28288e+07	1.58609e+07	1.97567e+07	2.14805e+06	2.41815e+06	2.6849e+06	9.69392e+06	1.01847e+07	9.80642e+06	1.66653e+07	1.3979e+07	1.2788e+07	1	1	1	4.51288	4.21177	3.65243	7.75831	5.78085	4.76293
SEC63	P14906	Protein translocation protein SEC63 OS=Saccharomyces cerevisiae (strain ATCC 204508 / S288c) GN=SEC63 PE=1 SV=2	1	1	3	3	4	5.81788	1650630	927139	776898	7235680	7076890	3028410	6813410	12726900	9228250	1.42936e+06	795971	1.04501e+06	6.26571e+06	6.07568e+06	4.07353e+06	5.90005e+06	1.09263e+07	1.2413e+07	1.2831e+06	902177	1.02708e+06	5.44185e+06	6.11118e+06	6.29221e+06	7.66446e+06	9.62989e+06	8.03461e+06	1	1	1	4.24117	6.77382	6.12629	5.97339	10.6741	7.82274
APE2	P32454	Aminopeptidase 2, mitochondrial OS=Saccharomyces cerevisiae (strain ATCC 204508 / S288c) GN=APE2 PE=1 SV=4	1	1	3	3	2	5.69641	411852	594261	364045	4315180	2646540	2077250	2610380	3622700	4690240	408979	551048	395351	4.28508e+06	2.45409e+06	2.25589e+06	2.59217e+06	3.35926e+06	5.09358e+06	367131	624573	388570	3.72164e+06	2.46843e+06	3.48457e+06	3.36736e+06	2.96067e+06	3.29695e+06	1	1	1	10.1371	3.95218	8.96769	9.17209	4.74031	8.48484
CDC3	P32457	Cell division control protein 3 OS=Saccharomyces cerevisiae (strain ATCC 204508 / S288c) GN=CDC3 PE=1 SV=3	1	1	3	3	4	5.9803	1436970	1074600	831589	5608610	6051090	1443380	4354740	10817100	7248370	1.32951e+06	788584	1.2248e+06	5.18918e+06	4.44053e+06	2.12587e+06	4.02908e+06	7.93802e+06	1.06757e+07	1.19347e+06	893805	1.20379e+06	4.50686e+06	4.46648e+06	3.28374e+06	5.23397e+06	6.99614e+06	6.91011e+06	1	1	1	3.77627	4.99715	2.72784	4.38551	7.82737	5.74031
REB1	P21538	DNA-binding protein REB1 OS=Saccharomyces cerevisiae (strain ATCC 204508 / S288c) GN=REB1 PE=1 SV=2	1	1	3	3	5	6.637	1582030	1817090	1076030	24835800	22083500	2940990	27531900	42329200	31950800	1.27826e+06	1.26317e+06	1.91574e+06	2.00669e+07	1.53516e+07	5.23608e+06	2.22453e+07	2.94255e+07	5.68846e+07	1.14746e+06	1.43171e+06	1.88288e+06	1.74284e+07	1.54413e+07	8.08795e+06	2.88978e+07	2.59341e+07	3.682e+07	1	1	1	15.1887	10.7852	4.29552	25.1841	18.1141	19.5551
HSV2	P50079	SVP1-like protein 2 OS=Saccharomyces cerevisiae (strain ATCC 204508 / S288c) GN=HSV2 PE=1 SV=1	1	1	3	3	4	6.14961	2665530	3296180	1705560	6333420	9368500	3664080	7394590	17943500	11238100	2.95083e+06	2.22034e+06	2.28716e+06	7.0113e+06	6.31073e+06	4.91355e+06	8.18605e+06	1.20869e+07	1.50704e+07	2.64889e+06	2.5166e+06	2.24793e+06	6.0894e+06	6.3476e+06	7.58976e+06	1.06341e+07	1.06528e+07	9.75467e+06	1	1	1	2.29885	2.52229	3.37633	4.01454	4.233	4.3394
RRF1	P38771	Ribosome-recycling factor, mitochondrial OS=Saccharomyces cerevisiae (strain ATCC 204508 / S288c) GN=RRF1 PE=1 SV=1	1	1	3	3	4	5.94683	2808580	829932	1050740	7295560	9098410	11314800	4894550	9087930	5894640	2.58751e+06	867693	1.09088e+06	6.72131e+06	9.51238e+06	1.1747e+07	4.50929e+06	9.50142e+06	6.11982e+06	2.32275e+06	983469	1.07217e+06	5.83754e+06	9.56796e+06	1.81452e+07	5.85779e+06	8.37404e+06	3.96121e+06	1	1	1	2.5132	9.72879	16.9238	2.52192	8.5148	3.69459
CIC1	P38779	Proteasome-interacting protein CIC1 OS=Saccharomyces cerevisiae (strain ATCC 204508 / S288c) GN=CIC1 PE=1 SV=1	1	1	3	3	6	6.59766	2234400	2111000	1791370	29031000	26418500	7580690	15359600	23071800	21394900	2.00464e+06	1.73916e+06	2.42359e+06	2.60458e+07	2.1765e+07	1.02561e+07	1.37802e+07	1.90078e+07	2.89458e+07	1.79952e+06	1.97121e+06	2.38202e+06	2.26211e+07	2.18922e+07	1.58422e+07	1.79012e+07	1.67524e+07	1.87359e+07	1	1	1	12.5706	11.106	6.65074	9.94775	8.49856	7.86554
PMT2	P31382	Dolichyl-phosphate-mannose--protein mannosyltransferase 2 OS=Saccharomyces cerevisiae (strain ATCC 204508 / S288c) GN=PMT2 PE=1 SV=2	1	1	3	3	2	6.45829	2712580	2687300	1909570	7810290	7304800	4120620	5354840	11251900	8449790	2.75264e+06	2.18389e+06	2.31554e+06	7.92563e+06	5.93641e+06	4.99666e+06	5.43392e+06	9.14411e+06	1.02462e+07	2.47098e+06	2.47529e+06	2.27582e+06	6.88351e+06	5.9711e+06	7.71814e+06	7.05894e+06	8.05912e+06	6.63212e+06	1	1	1	2.78574	2.41228	3.39136	2.85673	3.25583	2.91416
TUB1|TUB3	P09733|P09734	Tubulin alpha-1 chain OS=Saccharomyces cerevisiae (strain ATCC 204508 / S288c) GN=TUB1 PE=1 SV=2|Tubulin alpha-3 chain OS=Saccharomyces cerevisiae (strain ATCC 204508 / S288c) GN=TUB3 PE=1 SV=1	1	1	3	3	2	6.38063	755128	1177550	992446	4678720	8755070	3906900	2154180	3589780	5026110	999336	919838	960028	6.19182e+06	6.83898e+06	3.77928e+06	2.85084e+06	2.80414e+06	4.86193e+06	897081	1.04257e+06	943560	5.37767e+06	6.87895e+06	5.8377e+06	3.70338e+06	2.47142e+06	3.14701e+06	1	1	1	5.99463	6.59806	6.18689	4.12826	2.3705	3.33525
SPA2	P23201	Protein SPA2 OS=Saccharomyces cerevisiae (strain ATCC 204508 / S288c) GN=SPA2 PE=1 SV=1	1	1	3	3	2	5.65216	10986400	6965120	1380450	795347	1196800	2318000	694109	1008110	559107	9.94669e+06	5.65647e+06	1.8775e+06	720078	971938	3.15263e+06	628421	818700	760422	8.92891e+06	6.41121e+06	1.8453e+06	625397	977617	4.86974e+06	816350	721558	492203	1	1	1	0.0700418	0.152486	2.639	0.0914278	0.112546	0.266734
PBP1	P53297	PAB1-binding protein 1 OS=Saccharomyces cerevisiae (strain ATCC 204508 / S288c) GN=PBP1 PE=1 SV=1	1	1	3	3	3	5.92016	3188990	1867200	2371000	10751200	9900310	3618360	8591300	14122000	12828800	2.82048e+06	1.71925e+06	2.91148e+06	9.50882e+06	9.11583e+06	4.44319e+06	7.59851e+06	1.3003e+07	1.57532e+07	2.53188e+06	1.94864e+06	2.86154e+06	8.25852e+06	9.1691e+06	6.86321e+06	9.87085e+06	1.14601e+07	1.01967e+07	1	1	1	3.26182	4.70537	2.39843	3.89863	5.88108	3.56335
MRPS35	P53292	37S ribosomal protein S35, mitochondrial OS=Saccharomyces cerevisiae (strain ATCC 204508 / S288c) GN=MRPS35 PE=1 SV=1	1	1	3	3	2	5.71274	559919	446161	318367	2719030	2710790	971673	1786640	2352590	1906810	474832	372724	449383	2.30584e+06	2.2646e+06	1.37154e+06	1.51514e+06	1.96536e+06	2.69151e+06	426246	422457	441674	2.00265e+06	2.27784e+06	2.11856e+06	1.96824e+06	1.73216e+06	1.74215e+06	1	1	1	4.69834	5.39188	4.79666	4.61761	4.10022	3.94442
RPL7A	P05737	60S ribosomal protein L7-A OS=Saccharomyces cerevisiae (strain ATCC 204508 / S288c) GN=RPL7A PE=1 SV=3	1	1	3	3	11	8.51869	7575310	8084150	11703300	194469000	188950000	36960000	116703000	159678000	159177000	7.11411e+06	6.75652e+06	1.49107e+07	1.82629e+08	1.5792e+08	4.70894e+07	1.09598e+08	1.33455e+08	2.02802e+08	6.38617e+06	7.65804e+06	1.4655e+07	1.58616e+08	1.58842e+08	7.2737e+07	1.42373e+08	1.1762e+08	1.31268e+08	1	1	1	24.8374	20.7419	4.9633	22.294	15.359	8.95727
RPL6B	P05739	60S ribosomal protein L6-B OS=Saccharomyces cerevisiae (strain ATCC 204508 / S288c) GN=RPL6B PE=1 SV=4	1	1	3	3	5	6.82534	1670840	1797860	1722740	16659100	22158600	5452840	8191100	9298650	11790800	1.62749e+06	1.48962e+06	2.1346e+06	1.62269e+07	1.83596e+07	6.75647e+06	7.97857e+06	7.70442e+06	1.46097e+07	1.46096e+06	1.68838e+06	2.09799e+06	1.40932e+07	1.84668e+07	1.04364e+07	1.03646e+07	6.79026e+06	9.45648e+06	1	1	1	9.64656	10.9376	4.9745	7.09436	4.02176	4.50741
PHO2	P07269	Regulatory protein PHO2 OS=Saccharomyces cerevisiae (strain ATCC 204508 / S288c) GN=PHO2 PE=1 SV=1	1	1	3	3	3	5.68498	372936	685411	447559	3488050	3752520	1265130	2441160	5616530	3229790	415059	460380	598701	3.88202e+06	2.52051e+06	1.69237e+06	2.71689e+06	3.77254e+06	4.3205e+06	372588	521808	588431	3.37158e+06	2.53524e+06	2.61413e+06	3.52937e+06	3.32491e+06	2.79655e+06	1	1	1	9.04907	4.85856	4.44254	9.47257	6.3719	4.75256
PEP4	P07267	Saccharopepsin OS=Saccharomyces cerevisiae (strain ATCC 204508 / S288c) GN=PEP4 PE=1 SV=1	1	1	3	3	2	6.13317	1011990	749417	553819	4044990	3723390	2873880	1871980	4366080	3859600	1.03964e+06	659643	612460	4.15549e+06	3.27736e+06	3.17818e+06	1.92312e+06	3.84306e+06	4.26828e+06	933257	747658	601954	3.60909e+06	3.29651e+06	4.9092e+06	2.49823e+06	3.38706e+06	2.76275e+06	1	1	1	3.8672	4.40911	8.15544	2.67689	4.53023	4.58963
GDH1	P07262	NADP-specific glutamate dehydrogenase 1 OS=Saccharomyces cerevisiae (strain ATCC 204508 / S288c) GN=GDH1 PE=1 SV=2	1	1	3	3	2	5.61133	678994	635923	644943	2207670	2017970	906408	924084	2483160	1582540	712177	505269	773893	2.31556e+06	1.60337e+06	1.08764e+06	969245	1.97298e+06	1.89895e+06	639305	572687	760618	2.01109e+06	1.61274e+06	1.68002e+06	1.2591e+06	1.73888e+06	1.22915e+06	1	1	1	3.14575	2.81609	2.20876	1.96948	3.03635	1.61598
MYO2	P19524	Myosin-2 OS=Saccharomyces cerevisiae (strain ATCC 204508 / S288c) GN=MYO2 PE=1 SV=1	1	1	3	3	5	6.09996	4362750	3810260	2109610	18838500	21571100	9831090	8750110	16678900	13957400	4.23622e+06	2.98388e+06	2.77433e+06	1.82921e+07	1.68927e+07	1.29288e+07	8.49633e+06	1.30615e+07	1.83552e+07	3.80276e+06	3.38202e+06	2.72674e+06	1.58869e+07	1.69914e+07	1.99705e+07	1.10372e+07	1.15117e+07	1.18809e+07	1	1	1	4.17774	5.02405	7.32397	2.90241	3.40381	4.35719
TAF5	P38129	Transcription initiation factor TFIID subunit 5 OS=Saccharomyces cerevisiae (strain ATCC 204508 / S288c) GN=TAF5 PE=1 SV=1	1	1	3	3	4	5.78647	1245590	1053960	888844	6250410	6695560	3568010	6042280	8208130	7507990	1.18184e+06	933008	1.05823e+06	5.93052e+06	5.92718e+06	4.24796e+06	5.73305e+06	7.26616e+06	8.93878e+06	1.06091e+06	1.0575e+06	1.04008e+06	5.15073e+06	5.96181e+06	6.56165e+06	7.44751e+06	6.40401e+06	5.78585e+06	1	1	1	4.855	5.63766	6.30881	7.01991	6.05581	5.56291
MRPS9	P38120	37S ribosomal protein S9, mitochondrial OS=Saccharomyces cerevisiae (strain ATCC 204508 / S288c) GN=MRPS9 PE=1 SV=1	1	1	3	3	3	6.38743	2791980	1799890	1725760	25456600	21255900	5454000	11369900	15601800	16726500	2.25094e+06	1.60529e+06	2.40006e+06	2.05235e+07	1.89578e+07	7.58501e+06	9.16659e+06	1.3915e+07	2.32619e+07	2.02062e+06	1.81948e+06	2.35889e+06	1.78249e+07	1.90685e+07	1.17162e+07	1.19079e+07	1.22639e+07	1.50569e+07	1	1	1	8.82153	10.4802	4.96686	5.89319	6.74032	6.38305
IFM1	P25038	Translation initiation factor IF-2, mitochondrial OS=Saccharomyces cerevisiae (strain ATCC 204508 / S288c) GN=IFM1 PE=1 SV=2	1	1	3	3	4	5.87324	1499680	1822860	1489260	6102810	7639070	2678280	4167390	9034060	8323380	1.68612e+06	1.37684e+06	1.75368e+06	6.86153e+06	5.76992e+06	3.15381e+06	4.68549e+06	6.82358e+06	9.8012e+06	1.51359e+06	1.56055e+06	1.7236e+06	5.95932e+06	5.80364e+06	4.87156e+06	6.08669e+06	6.01394e+06	6.34408e+06	1	1	1	3.9372	3.71897	2.82639	4.02135	3.85373	3.68072
POX1	P13711	Acyl-coenzyme A oxidase OS=Saccharomyces cerevisiae (strain ATCC 204508 / S288c) GN=POX1 PE=3 SV=2	1	1	3	3	11	6.90731	7451710	4556430	2978590	38436000	44784500	23652200	20574100	41624000	36327600	7.07382e+06	3.82909e+06	3.73371e+06	3.64869e+07	3.76356e+07	2.96484e+07	1.95308e+07	3.49796e+07	4.55373e+07	6.35001e+06	4.34001e+06	3.66967e+06	3.16893e+07	3.78555e+07	4.57967e+07	2.53714e+07	3.08291e+07	2.94752e+07	1	1	1	4.99043	8.72246	12.4798	3.9955	7.10348	8.03211
RED1	P14291	Protein RED1 OS=Saccharomyces cerevisiae (strain ATCC 204508 / S288c) GN=RED1 PE=1 SV=1	1	1	3	3	10	7.3981	2965190	2633530	3033260	84854600	50800400	30680000	34096700	46069000	45317200	2.64135e+06	2.61931e+06	3.42363e+06	7.55873e+07	5.05261e+07	3.46284e+07	3.03729e+07	4.58203e+07	5.11494e+07	2.37108e+06	2.9688e+06	3.3649e+06	6.56485e+07	5.08214e+07	5.34891e+07	3.94559e+07	4.03835e+07	3.31078e+07	1	1	1	27.6872	17.1185	15.8962	16.6405	13.6026	9.83914
SCP160	P06105	Protein SCP160 OS=Saccharomyces cerevisiae (strain ATCC 204508 / S288c) GN=SCP160 PE=1 SV=3	1	1	3	3	5	6.00433	1583560	1954350	1791380	5602210	8103180	3589990	6946920	14698000	11953200	1.88115e+06	1.49079e+06	1.9769e+06	6.65502e+06	6.18114e+06	3.96178e+06	8.25244e+06	1.12117e+07	1.31911e+07	1.68867e+06	1.6897e+06	1.94299e+06	5.77996e+06	6.21726e+06	6.11959e+06	1.07203e+07	9.88139e+06	8.53828e+06	1	1	1	3.42279	3.6795	3.14958	6.34839	5.84801	4.39441
MET17	P06106	Homocysteine/cysteine synthase OS=Saccharomyces cerevisiae (strain ATCC 204508 / S288c) GN=MET17 PE=1 SV=3	1	1	3	3	2	5.71746	286648	151661	292619	2162830	1231910	924723	1212250	1603720	2152240	251575	180850	279602	1.89819e+06	1.46901e+06	883586	1.06392e+06	1.91238e+06	2.0565e+06	225833	204981	274805	1.6486e+06	1.47759e+06	1.36484e+06	1.38209e+06	1.68547e+06	1.33112e+06	1	1	1	7.30011	7.20843	4.96656	6.11997	8.22255	4.84386
PRT1	P06103	Eukaryotic translation initiation factor 3 subunit B OS=Saccharomyces cerevisiae (strain ATCC 204508 / S288c) GN=PRT1 PE=1 SV=1	1	1	3	3	5	6.32802	3148950	2324680	2138700	18993600	18452000	10093600	15909500	26933200	24353000	3.01229e+06	2.08452e+06	2.4933e+06	1.81693e+07	1.65458e+07	1.17672e+07	1.52191e+07	2.41508e+07	2.83908e+07	2.70407e+06	2.36266e+06	2.45053e+06	1.57803e+07	1.66424e+07	1.81762e+07	1.97703e+07	2.12852e+07	1.83767e+07	1	1	1	5.83576	7.04395	7.41725	7.31133	9.009	7.49905
RVB1	Q03940	RuvB-like protein 1 OS=Saccharomyces cerevisiae (strain ATCC 204508 / S288c) GN=RVB1 PE=1 SV=1	1	1	3	3	4	6.53464	1183030	1060090	879119	6319060	5478690	2414340	4864320	9473720	7727900	1.13387e+06	885021	1.09868e+06	6.05647e+06	4.57391e+06	3.01731e+06	4.66219e+06	7.90918e+06	9.65791e+06	1.01785e+06	1.00311e+06	1.07983e+06	5.26012e+06	4.60064e+06	4.66071e+06	6.05641e+06	6.97072e+06	6.25133e+06	1	1	1	5.16788	4.58638	4.31616	5.95021	6.94912	5.78919
RNP1	P32385	Ribonucleoprotein 1 OS=Saccharomyces cerevisiae (strain ATCC 204508 / S288c) GN=RNP1 PE=3 SV=2	1	1	3	3	8	7.00532	1428720	1997630	1730940	37810300	46443300	9604110	21627400	60368400	39594000	1.59548e+06	1.32301e+06	2.3404e+06	4.22235e+07	3.07589e+07	1.29857e+07	2.41517e+07	3.99814e+07	5.3535e+07	1.43222e+06	1.49954e+06	2.30025e+06	3.66716e+07	3.09387e+07	2.00585e+07	3.13743e+07	3.52374e+07	3.46519e+07	1	1	1	25.6046	20.6321	8.72011	21.906	23.4989	15.0644
YBT1	P32386	ATP-dependent bile acid permease OS=Saccharomyces cerevisiae (strain ATCC 204508 / S288c) GN=YBT1 PE=1 SV=2	1	1	3	3	2	5.43458	1083490	1254900	522054	2842510	2606680	1525220	1998040	3010690	3211210	1.03547e+06	1.02529e+06	668600	2.71653e+06	2.12972e+06	1.95337e+06	1.90949e+06	2.45981e+06	4.11263e+06	929518	1.16209e+06	657131	2.35934e+06	2.14217e+06	3.01728e+06	2.48052e+06	2.16795e+06	2.66201e+06	1	1	1	2.53824	1.84338	4.5916	2.66861	1.86556	4.05095
MRP20	P32387	54S ribosomal protein L41, mitochondrial OS=Saccharomyces cerevisiae (strain ATCC 204508 / S288c) GN=MRP20 PE=1 SV=1	1	1	3	3	3	6.12357	921960	937634	767660	9098310	10374900	4172260	3246230	4210670	4311180	894634	794075	934130	8.82865e+06	8.78642e+06	5.07703e+06	3.15002e+06	3.56598e+06	5.24608e+06	803092	900027	918106	7.66779e+06	8.83776e+06	7.84228e+06	4.09203e+06	3.14286e+06	3.39566e+06	1	1	1	9.54782	9.81943	8.5418	5.09534	3.49196	3.69854
TIF35	Q04067	Eukaryotic translation initiation factor 3 subunit G OS=Saccharomyces cerevisiae (strain ATCC 204508 / S288c) GN=TIF35 PE=1 SV=1	1	1	3	3	3	6.28815	1848210	1508330	1162830	6958670	8095480	4362050	5083850	9670670	8094220	1.87423e+06	1.25601e+06	1.37705e+06	7.05662e+06	6.74122e+06	5.16564e+06	5.15541e+06	8.0529e+06	9.58536e+06	1.68245e+06	1.4236e+06	1.35343e+06	6.12876e+06	6.78061e+06	7.97915e+06	6.69714e+06	7.09739e+06	6.20437e+06	1	1	1	3.64276	4.76302	5.89551	3.98059	4.98554	4.58419
DBP2	P24783	ATP-dependent RNA helicase DBP2 OS=Saccharomyces cerevisiae (strain ATCC 204508 / S288c) GN=DBP2 PE=1 SV=1	1	1	3	3	4	6.1912	1718780	1637140	1097120	8622600	7684090	4022060	5628400	9076580	9993670	1.65811e+06	1.42242e+06	1.30894e+06	8.31825e+06	6.67627e+06	4.79859e+06	5.42973e+06	7.88612e+06	1.19231e+07	1.48845e+06	1.61221e+06	1.28649e+06	7.2245e+06	6.71528e+06	7.41219e+06	7.05349e+06	6.9504e+06	7.71755e+06	1	1	1	4.85371	4.16526	5.76158	4.73882	4.3111	5.99894
SUC2	P00724|P00724-2	Invertase 2 OS=Saccharomyces cerevisiae (strain ATCC 204508 / S288c) GN=SUC2 PE=1 SV=1|Isoform Intracellular of Invertase 2 OS=Saccharomyces cerevisiae (strain ATCC 204508 / S288c) GN=SUC2	1	1	3	3	3	6.10598	746182	886057	724955	6491140	4235770	4045860	5295470	4569770	8926270	715181	971166	690094	6.22146e+06	4.64263e+06	3.85131e+06	5.07546e+06	5.00871e+06	8.49703e+06	642001	1.10075e+06	678256	5.40341e+06	4.66976e+06	5.94895e+06	6.59328e+06	4.41441e+06	5.49992e+06	1	1	1	8.41651	4.24235	8.77095	10.2699	4.01037	8.10891
RPS5	P26783	40S ribosomal protein S5 OS=Saccharomyces cerevisiae (strain ATCC 204508 / S288c) GN=RPS5 PE=1 SV=3	1	1	3	3	5	7.20128	15471800	10728400	7682050	43636400	37376400	37583400	30095000	43039400	39960800	1.42678e+07	1.04467e+07	8.55496e+06	4.02406e+07	3.6395e+07	4.1854e+07	2.7753e+07	4.19093e+07	4.45015e+07	1.28078e+07	1.18406e+07	8.40821e+06	3.49494e+07	3.66076e+07	6.46501e+07	3.60525e+07	3.69366e+07	2.88048e+07	1	1	1	2.72875	3.09171	7.68893	2.81488	3.11949	3.42579
RPL16B	P26785	60S ribosomal protein L16-B OS=Saccharomyces cerevisiae (strain ATCC 204508 / S288c) GN=RPL16B PE=1 SV=3	1	1	3	3	9	8.13237	13157500	7390920	7848470	171965000	143301000	34615100	52044800	62219100	74345900	1.01411e+07	6.91272e+06	1.08874e+07	1.32541e+08	1.34029e+08	4.8018e+07	4.01133e+07	5.81935e+07	1.03133e+08	9.10341e+06	7.83508e+06	1.07006e+07	1.15114e+08	1.34813e+08	7.41714e+07	5.21092e+07	5.12886e+07	6.67551e+07	1	1	1	12.6451	17.2063	6.9315	5.72413	6.54602	6.23844
RPL16A	P26784	60S ribosomal protein L16-A OS=Saccharomyces cerevisiae (strain ATCC 204508 / S288c) GN=RPL16A PE=1 SV=3	1	1	3	3	6	7.52761	2363950	2096200	1670680	50785400	54362300	8946350	21270300	23251100	29440800	1.95239e+06	1.7101e+06	2.47957e+06	4.19438e+07	4.43492e+07	1.32779e+07	1.75672e+07	1.89684e+07	4.36951e+07	1.75262e+06	1.93827e+06	2.43704e+06	3.64287e+07	4.46083e+07	2.05098e+07	2.28207e+07	1.67178e+07	2.82828e+07	1	1	1	20.7853	23.0145	8.41588	13.0209	8.62507	11.6054
RPS7A	P26786	40S ribosomal protein S7-A OS=Saccharomyces cerevisiae (strain ATCC 204508 / S288c) GN=RPS7A PE=1 SV=4	1	1	3	3	3	6.15425	3552600	1747540	1347940	28345500	28746600	16685000	32656400	41993100	39026500	2.92002e+06	1.66546e+06	1.72077e+06	2.32982e+07	2.73965e+07	2.13e+07	2.68415e+07	4.00208e+07	4.9821e+07	2.62123e+06	1.88769e+06	1.69126e+06	2.02348e+07	2.75566e+07	3.29012e+07	3.48685e+07	3.52722e+07	3.22479e+07	1	1	1	7.71958	14.5981	19.4537	13.3023	18.6854	19.0675
MET6	P05694	5-methyltetrahydropteroyltriglutamate--homocysteine methyltransferase OS=Saccharomyces cerevisiae (strain ATCC 204508 / S288c) GN=MET6 PE=1 SV=4	1	1	3	3	3	5.60382	861805	1170740	891223	4946360	4614490	3084290	2999660	4568980	6348130	959729	1.0471e+06	894786	5.5084e+06	4.12716e+06	3.09662e+06	3.3405e+06	4.08646e+06	6.37351e+06	861527	1.18681e+06	879437	4.78411e+06	4.15128e+06	4.78322e+06	4.33948e+06	3.60158e+06	4.12542e+06	1	1	1	5.55306	3.49783	5.43896	5.03696	3.03467	4.69097
RGI1	P40043	Respiratory growth induced protein 1 OS=Saccharomyces cerevisiae (strain ATCC 204508 / S288c) GN=RGI1 PE=1 SV=1	1	1	3	3	2	6.68889	1940930	1046990	953967	4304430	5844270	2455160	3079920	5706560	4860140	1.83394e+06	893560	1.18298e+06	4.06716e+06	4.98783e+06	3.04455e+06	2.91015e+06	4.8703e+06	6.02687e+06	1.64629e+06	1.01279e+06	1.16268e+06	3.53238e+06	5.01698e+06	4.70279e+06	3.78043e+06	4.29242e+06	3.90105e+06	1	1	1	2.14566	4.95363	4.04477	2.29634	4.23822	3.35521
THO1	P40040	Protein THO1 OS=Saccharomyces cerevisiae (strain ATCC 204508 / S288c) GN=THO1 PE=1 SV=1	1	1	3	3	4	6.26589	3023710	2302070	2143460	6999570	8043980	4042970	6297240	11770700	10494300	3.06079e+06	1.97789e+06	2.46456e+06	7.0854e+06	6.91121e+06	4.64862e+06	6.37446e+06	1.01131e+07	1.20664e+07	2.7476e+06	2.2418e+06	2.42228e+06	6.15376e+06	6.95159e+06	7.18053e+06	8.28074e+06	8.91316e+06	7.81028e+06	1	1	1	2.23969	3.1009	2.96437	3.01381	3.9759	3.22435
BBC1	P47068	Myosin tail region-interacting protein MTI1 OS=Saccharomyces cerevisiae (strain ATCC 204508 / S288c) GN=BBC1 PE=1 SV=2	1	1	3	3	6	6.46664	3083630	3286550	2208200	19432700	24644800	16613700	11675300	24992700	19729300	3.48313e+06	2.60521e+06	2.4662e+06	2.19503e+07	1.95356e+07	1.85548e+07	1.31879e+07	1.98114e+07	2.20344e+07	3.12673e+06	2.95282e+06	2.4239e+06	1.90641e+07	1.96498e+07	2.86608e+07	1.71317e+07	1.74607e+07	1.42623e+07	1	1	1	6.09715	6.65458	11.8243	5.47913	5.91323	5.88406
YEL020C	P39994	Putative 2-hydroxyacyl-CoA lyase OS=Saccharomyces cerevisiae (strain ATCC 204508 / S288c) GN=YEL020C PE=1 SV=1	1	1	3	3	2	6.28719	1137270	791880	688307	5872930	8039760	3449990	3887060	8724690	6277080	1.16356e+06	628754	847296	6.0087e+06	6.38358e+06	4.24689e+06	3.97692e+06	6.92742e+06	7.727e+06	1.0445e+06	712648	832761	5.21863e+06	6.42088e+06	6.55999e+06	5.16622e+06	6.10545e+06	5.00149e+06	1	1	1	4.99628	9.00989	7.87739	4.94611	8.56727	6.00591
GTT3	P39996	Glutathione transferase 3 OS=Saccharomyces cerevisiae (strain ATCC 204508 / S288c) GN=GTT3 PE=1 SV=1	1	1	3	3	2	5.62789	319753	534465	354375	1428320	2147170	506945	2993780	3681980	3222210	329446	378053	486250	1.47162e+06	1.5188e+06	695597	3.08453e+06	2.60444e+06	4.42131e+06	295736	428497	477909	1.27812e+06	1.52767e+06	1.07446e+06	4.00696e+06	2.29542e+06	2.8618e+06	1	1	1	4.32182	3.56519	2.24825	13.5491	5.35691	5.98817
DEF1	P35732	RNA polymerase II degradation factor 1 OS=Saccharomyces cerevisiae (strain ATCC 204508 / S288c) GN=DEF1 PE=1 SV=1	1	1	3	3	4	6.68815	9150270	6552860	6567550	33776600	29980100	11521500	24701200	35215200	28516400	7.86517e+06	5.82053e+06	8.60196e+06	2.90329e+07	2.66296e+07	1.50905e+07	2.12321e+07	3.12797e+07	3.73499e+07	7.06038e+06	6.59716e+06	8.45441e+06	2.52154e+07	2.67852e+07	2.33096e+07	2.75815e+07	2.75682e+07	2.41756e+07	1	1	1	3.57139	4.06011	2.7571	3.90652	4.1788	2.85953
BRX1	Q08235	Ribosome biogenesis protein BRX1 OS=Saccharomyces cerevisiae (strain ATCC 204508 / S288c) GN=BRX1 PE=1 SV=2	1	1	3	3	2	6.87335	2240760	1669410	1102220	20132900	17176500	5440220	8762570	12708400	13309400	1.85891e+06	1.42301e+06	1.55869e+06	1.6702e+07	1.46413e+07	7.69324e+06	7.26933e+06	1.08327e+07	1.88214e+07	1.6687e+06	1.61288e+06	1.53196e+06	1.45059e+07	1.47268e+07	1.18834e+07	9.44322e+06	9.54732e+06	1.21826e+07	1	1	1	8.69294	9.13077	7.75702	5.65903	5.91943	7.95232
RPL3	P14126	60S ribosomal protein L3 OS=Saccharomyces cerevisiae (strain ATCC 204508 / S288c) GN=RPL3 PE=1 SV=4	1	1	3	3	17	8.14665	17577300	49453600	18080700	301227000	303564000	54213300	123922000	164664000	206125000	1.78698e+07	3.23108e+07	2.72206e+07	3.0624e+08	1.98336e+08	8.16184e+07	1.25984e+08	1.07584e+08	3.10322e+08	1.60413e+07	3.6622e+07	2.67536e+07	2.65973e+08	1.99494e+08	1.26072e+08	1.6366e+08	9.4819e+07	2.00864e+08	1	1	1	16.5805	5.44739	4.71235	10.2024	2.58912	7.50791
RPS17A|RPS17B	P02407|P14127	40S ribosomal protein S17-A OS=Saccharomyces cerevisiae (strain ATCC 204508 / S288c) GN=RPS17A PE=1 SV=1|40S ribosomal protein S17-B OS=Saccharomyces cerevisiae (strain ATCC 204508 / S288c) GN=RPS17B PE=1 SV=1	1	1	3	3	3	5.91371	2263230	782176	445393	6320020	6832970	2822290	3320810	5478580	3955820	1.6691e+06	677789	696947	4.66092e+06	5.92106e+06	4.4163e+06	2.44905e+06	4.74742e+06	6.19004e+06	1.49831e+06	768226	684992	4.04807e+06	5.95566e+06	6.82167e+06	3.18144e+06	4.18412e+06	4.00666e+06	1	1	1	2.70175	7.75249	9.95876	2.12335	5.44648	5.8492
RPL30	P14120	60S ribosomal protein L30 OS=Saccharomyces cerevisiae (strain ATCC 204508 / S288c) GN=RPL30 PE=1 SV=3	1	1	3	3	3	6.28767	5453740	1850230	2520200	86592400	90191000	29731700	45849100	54863700	58306100	4.14878e+06	1.87526e+06	3.26868e+06	6.58727e+07	9.14112e+07	3.85618e+07	3.48784e+07	5.5606e+07	7.56227e+07	3.72426e+06	2.12548e+06	3.21261e+06	5.72113e+07	9.19453e+07	5.95648e+07	4.53088e+07	4.90081e+07	4.89487e+07	1	1	1	15.3618	43.2587	18.5409	12.1658	23.0575	15.2364
RPS3	P05750	40S ribosomal protein S3 OS=Saccharomyces cerevisiae (strain ATCC 204508 / S288c) GN=RPS3 PE=1 SV=5	1	1	3	3	9	7.37885	10501100	11146800	5051840	81853600	74925300	40445800	58428000	100714000	92608000	9.97742e+06	8.91817e+06	6.6457e+06	7.77717e+07	5.99451e+07	5.32065e+07	5.55143e+07	8.05778e+07	1.21826e+08	8.9565e+06	1.01081e+07	6.5317e+06	6.75456e+07	6.02954e+07	8.21858e+07	7.21158e+07	7.10169e+07	7.88549e+07	1	1	1	7.54152	5.96505	12.5826	8.05178	7.02573	12.0726
NOG1	Q02892	Nucleolar GTP-binding protein 1 OS=Saccharomyces cerevisiae (strain ATCC 204508 / S288c) GN=NOG1 PE=1 SV=1	1	1	3	3	5	6.41551	3402920	3322040	2641190	32942300	28179000	9238920	13519300	23369100	20522400	3.13422e+06	2.70736e+06	3.51869e+06	3.03411e+07	2.2965e+07	1.23084e+07	1.24518e+07	1.90451e+07	2.73407e+07	2.81352e+06	3.0686e+06	3.45833e+06	2.63516e+07	2.30992e+07	1.90123e+07	1.61755e+07	1.67853e+07	1.7697e+07	1	1	1	9.36608	7.5276	5.49754	5.74921	5.47002	5.1172
RPS13	P05756	40S ribosomal protein S13 OS=Saccharomyces cerevisiae (strain ATCC 204508 / S288c) GN=RPS13 PE=1 SV=3	1	1	3	3	4	6.93012	2895010	1941110	1140950	20571500	28418400	7067280	6511710	9138640	8483420	2.45801e+06	1.51011e+06	1.72732e+06	1.74662e+07	2.21085e+07	1.06994e+07	5.52877e+06	7.10954e+06	1.28433e+07	2.2065e+06	1.71161e+06	1.69769e+06	1.51696e+07	2.22377e+07	1.65269e+07	7.18214e+06	6.26596e+06	8.31318e+06	1	1	1	6.87498	12.9923	9.73492	3.255	3.66086	4.89675
RPS31	P05759	Ubiquitin-40S ribosomal protein S31 OS=Saccharomyces cerevisiae (strain ATCC 204508 / S288c) GN=RPS31 PE=1 SV=3	1	1	3	3	8	7.3964	8795770	7349470	6665900	46438300	42423200	16166800	49799900	72053400	50912300	7.68841e+06	6.21498e+06	9.01804e+06	4.05918e+07	3.58746e+07	2.18714e+07	4.35302e+07	6.0931e+07	6.88773e+07	6.90171e+06	7.04425e+06	8.86335e+06	3.52545e+07	3.60843e+07	3.37839e+07	5.65479e+07	5.37013e+07	4.45826e+07	1	1	1	5.10809	5.12252	3.81164	8.19333	7.62343	5.03
RPA135	P22138	DNA-directed RNA polymerase I subunit RPA135 OS=Saccharomyces cerevisiae (strain ATCC 204508 / S288c) GN=RPA135 PE=1 SV=1	1	1	3	3	2	5.88323	843774	557010	597452	5387760	4728150	1708740	3750710	4500400	4875730	706745	526680	754367	4.51279e+06	4.4707e+06	2.15752e+06	3.14159e+06	4.25535e+06	6.15629e+06	634428	596955	741426	3.91941e+06	4.49682e+06	3.33264e+06	4.08109e+06	3.75043e+06	3.98482e+06	1	1	1	6.17786	7.53293	4.4949	6.4327	6.28261	5.37453
MDH2	P22133	Malate dehydrogenase, cytoplasmic OS=Saccharomyces cerevisiae (strain ATCC 204508 / S288c) GN=MDH2 PE=1 SV=2	1	1	3	3	3	6.3563	1762070	1275990	1039780	16425100	11794600	6562190	8330620	19788100	13716200	1.62387e+06	1.09597e+06	1.3136e+06	1.51368e+07	1.01306e+07	8.2903e+06	7.67722e+06	1.69963e+07	1.73283e+07	1.45771e+06	1.2422e+06	1.29107e+06	1.31465e+07	1.01898e+07	1.28057e+07	9.9731e+06	1.49797e+07	1.12162e+07	1	1	1	9.01863	8.20298	9.91869	6.84164	12.0589	8.68752
CHC1	P22137	Clathrin heavy chain OS=Saccharomyces cerevisiae (strain ATCC 204508 / S288c) GN=CHC1 PE=1 SV=1	1	1	3	3	4	5.91362	2147470	1151710	1367580	8154880	6096910	9898860	5692920	9126910	8804320	2.08556e+06	1.296e+06	1.2514e+06	7.91976e+06	6.86076e+06	9.05792e+06	5.52878e+06	1.02704e+07	8.05636e+06	1.87215e+06	1.46893e+06	1.22993e+06	6.87841e+06	6.90085e+06	1.39914e+07	7.18217e+06	9.05175e+06	5.21469e+06	1	1	1	3.67406	4.69789	11.3757	3.83631	6.16216	4.23981
MRPL3	P36516	54S ribosomal protein L3, mitochondrial OS=Saccharomyces cerevisiae (strain ATCC 204508 / S288c) GN=MRPL3 PE=1 SV=2	1	1	3	3	4	5.57792	910454	1499270	956131	6204100	6676920	2949180	2285800	5337380	4608420	1.06685e+06	1.09426e+06	1.11797e+06	7.26982e+06	4.87324e+06	3.44837e+06	2.67845e+06	3.89556e+06	5.38847e+06	957686	1.24027e+06	1.09879e+06	6.31393e+06	4.90172e+06	5.32656e+06	3.47944e+06	3.43334e+06	3.48782e+06	1	1	1	6.5929	3.95214	4.84764	3.63317	2.76822	3.17423
FAS2	P19097	Fatty acid synthase subunit alpha OS=Saccharomyces cerevisiae (strain ATCC 204508 / S288c) GN=FAS2 PE=1 SV=2	1	1	3	3	12	6.60894	53576600	30649700	6109990	36175100	35127500	20064200	20243900	44056300	34026100	4.26555e+07	2.29065e+07	1.02685e+07	2.88011e+07	2.6253e+07	3.37202e+07	1.61174e+07	3.29261e+07	5.71847e+07	3.82908e+07	2.59629e+07	1.00924e+07	2.50141e+07	2.64064e+07	5.20861e+07	2.09373e+07	2.90193e+07	3.70143e+07	1	1	1	0.653266	1.01708	5.16093	0.546795	1.11772	3.66754
RPS29A	P41057	40S ribosomal protein S29-A OS=Saccharomyces cerevisiae (strain ATCC 204508 / S288c) GN=RPS29A PE=1 SV=3	1	1	3	3	2	6.50737	5805110	4638290	3992490	14970500	17341900	12020000	12386300	13059800	13212600	5.45876e+06	4.39718e+06	4.47862e+06	1.40773e+07	1.64404e+07	1.34836e+07	1.16473e+07	1.23809e+07	1.48214e+07	4.9002e+06	4.98389e+06	4.4018e+06	1.22263e+07	1.65365e+07	2.08275e+07	1.51304e+07	1.09119e+07	9.59352e+06	1	1	1	2.49506	3.31799	4.73159	3.08771	2.18943	2.17946
VPS72	Q03388	Vacuolar protein sorting-associated protein 72 OS=Saccharomyces cerevisiae (strain ATCC 204508 / S288c) GN=VPS72 PE=1 SV=2	1	1	3	3	3	5.65232	504605	754637	440329	3736880	2345490	600266	3790310	3762790	4755670	412742	631951	642843	3.05658e+06	1.96417e+06	876338	3.10029e+06	3.15105e+06	6.94288e+06	370509	716271	631816	2.65468e+06	1.97565e+06	1.35364e+06	4.02743e+06	2.77716e+06	4.49396e+06	1	1	1	7.16495	2.75824	2.14246	10.87	3.87725	7.11276
MDH3	P32419	Malate dehydrogenase, peroxisomal OS=Saccharomyces cerevisiae (strain ATCC 204508 / S288c) GN=MDH3 PE=1 SV=3	1	1	3	3	6	6.82224	6867540	2333150	2251640	20629600	32271300	19849500	18264700	38914500	27851700	6.41927e+06	2.09237e+06	2.68608e+06	1.9283e+07	2.89409e+07	2.36793e+07	1.70725e+07	3.48986e+07	3.32255e+07	5.76243e+06	2.37155e+06	2.64e+06	1.67475e+07	2.911e+07	3.65764e+07	2.2178e+07	3.07577e+07	2.1506e+07	1	1	1	2.90633	12.2747	13.8547	3.84873	12.9694	8.14623
PDS5	Q04264	Sister chromatid cohesion protein PDS5 OS=Saccharomyces cerevisiae (strain ATCC 204508 / S288c) GN=PDS5 PE=1 SV=1	1	1	3	3	9	6.26803	4514120	4182420	3446170	32921000	26127100	12165700	11467800	14640800	19607200	4.13373e+06	3.91151e+06	4.02394e+06	3.01469e+07	2.44347e+07	1.42053e+07	1.05014e+07	1.36925e+07	2.28944e+07	3.71075e+06	4.43342e+06	3.95491e+06	2.61829e+07	2.45775e+07	2.19424e+07	1.36419e+07	1.20678e+07	1.4819e+07	1	1	1	7.05595	5.5437	5.54814	3.67632	2.72201	3.74699
SSD1	P24276	Protein SSD1 OS=Saccharomyces cerevisiae (strain ATCC 204508 / S288c) GN=SSD1 PE=1 SV=1	1	1	3	3	2	5.49938	286119	218851	88043.1	2226810	2158650	1730860	1610090	2394320	1841030	250437	185420	118723	1.94911e+06	1.8289e+06	2.334e+06	1.4093e+06	2.02857e+06	2.48256e+06	224812	210160	116686	1.69282e+06	1.83959e+06	3.60524e+06	1.83075e+06	1.78787e+06	1.6069e+06	1	1	1	7.52995	8.75326	30.8968	8.14347	8.50718	13.7711
MCM3	P24279	DNA replication licensing factor MCM3 OS=Saccharomyces cerevisiae (strain ATCC 204508 / S288c) GN=MCM3 PE=1 SV=1	1	1	3	3	2	5.78078	795424	631764	411218	1681290	2269600	996900	2448630	6868350	3821370	828230	455732	547476	1.75063e+06	1.63721e+06	1.32722e+06	2.54962e+06	4.95459e+06	5.08759e+06	743483	516540	538084	1.52045e+06	1.64678e+06	2.05011e+06	3.31208e+06	4.3667e+06	3.29307e+06	1	1	1	2.04503	3.18809	3.81001	4.45482	8.45375	6.11999
CAM1	P29547	Elongation factor 1-gamma 1 OS=Saccharomyces cerevisiae (strain ATCC 204508 / S288c) GN=CAM1 PE=1 SV=2	1	1	3	3	2	5.89286	1000950	734745	698728	3558050	4090490	1598400	2936070	6019690	4616630	983441	601322	868963	3.49581e+06	3.3477e+06	1.98783e+06	2.88471e+06	4.92657e+06	5.74141e+06	882812	681557	854057	3.03615e+06	3.36726e+06	3.07051e+06	3.74738e+06	4.34202e+06	3.71627e+06	1	1	1	3.43918	4.94054	3.59521	4.24483	6.37073	4.35132
SCC2	Q04002	Sister chromatid cohesion protein 2 OS=Saccharomyces cerevisiae (strain ATCC 204508 / S288c) GN=SCC2 PE=1 SV=1	1	1	3	3	7	5.86353	2316950	1970610	1162890	11173500	10702900	5322380	4279530	12753200	7615630	2.3253e+06	1.47149e+06	1.55174e+06	1.12138e+07	7.99205e+06	7.10209e+06	4.29496e+06	9.52304e+06	1.01622e+07	2.08737e+06	1.66783e+06	1.52512e+06	9.73931e+06	8.03875e+06	1.09703e+07	5.57937e+06	8.3931e+06	6.57772e+06	1	1	1	4.66582	4.81989	7.19307	2.67292	5.03235	4.31291
VPS1	P21576	Vacuolar protein sorting-associated protein 1 OS=Saccharomyces cerevisiae (strain ATCC 204508 / S288c) GN=VPS1 PE=1 SV=2	1	1	3	3	15	6.78705	10273600	10864000	5118920	44663300	62726600	22739800	30970300	99243700	48934200	1.10379e+07	6.93925e+06	7.45917e+06	4.79861e+07	4.00659e+07	3.31359e+07	3.32744e+07	6.33908e+07	7.13057e+07	9.90849e+06	7.86515e+06	7.33121e+06	4.16765e+07	4.03e+07	5.11836e+07	4.32251e+07	5.58692e+07	4.61545e+07	1	1	1	4.20614	5.12387	6.9816	4.36243	7.10338	6.29561
IOC3	P43596	ISWI one complex protein 3 OS=Saccharomyces cerevisiae (strain ATCC 204508 / S288c) GN=IOC3 PE=1 SV=1	1	1	3	3	2	6.83588	561523	468269	524407	4045800	4820210	1289680	5357800	9706460	7174260	541189	371013	686742	3.89929e+06	3.81909e+06	1.68891e+06	5.16378e+06	7.6905e+06	9.39512e+06	485813	420517	674962	3.38658e+06	3.8414e+06	2.60879e+06	6.70801e+06	6.77799e+06	6.08123e+06	1	1	1	6.97096	9.13496	3.8651	13.8078	16.1182	9.00974
YFR006W	P43590	Uncharacterized peptidase YFR006W OS=Saccharomyces cerevisiae (strain ATCC 204508 / S288c) GN=YFR006W PE=1 SV=1	1	1	3	3	2	5.64596	501590	761816	564428	3804550	2029420	1280430	1712760	2390200	2907090	484113	705795	631222	3.67199e+06	1.88019e+06	1.43195e+06	1.65308e+06	2.21444e+06	3.25111e+06	434577	799969	620394	3.18917e+06	1.89117e+06	2.21188e+06	2.14744e+06	1.95168e+06	2.10436e+06	1	1	1	7.33855	2.36406	3.56528	4.94144	2.4397	3.39198
UBP6	P43593	Ubiquitin carboxyl-terminal hydrolase 6 OS=Saccharomyces cerevisiae (strain ATCC 204508 / S288c) GN=UBP6 PE=1 SV=1	1	1	3	3	2	5.81619	1077150	816428	691053	4130180	4076240	2244890	3989990	8162930	7603220	1.07916e+06	709784	793401	4.13789e+06	3.54379e+06	2.57737e+06	3.99744e+06	7.09666e+06	8.72929e+06	968739	804490	779791	3.59381e+06	3.5645e+06	3.98115e+06	5.19288e+06	6.25462e+06	5.65026e+06	1	1	1	3.70978	4.43076	5.10541	5.36045	7.77464	7.24586
LSC2	P53312	Succinyl-CoA ligase [ADP-forming] subunit beta, mitochondrial OS=Saccharomyces cerevisiae (strain ATCC 204508 / S288c) GN=LSC2 PE=1 SV=1	1	1	3	3	5	6.10069	2141860	2105730	1894460	12178100	9309550	5211300	7201110	11479600	12728900	2.08986e+06	1.93449e+06	2.11346e+06	1.18825e+07	8.55249e+06	5.81374e+06	7.02629e+06	1.05461e+07	1.42004e+07	1.87602e+06	2.19261e+06	2.07721e+06	1.03201e+07	8.60247e+06	8.98023e+06	9.1275e+06	9.29474e+06	9.19156e+06	1	1	1	5.50103	3.92339	4.32322	4.86535	4.23912	4.42496
RAD52	P06778|P06778-2|P06778-3	DNA repair and recombination protein RAD52 OS=Saccharomyces cerevisiae (strain ATCC 204508 / S288c) GN=RAD52 PE=1 SV=2|Isoform 2 of DNA repair and recombination protein RAD52 OS=Saccharomyces cerevisiae (strain ATCC 204508 / S288c) GN=RAD52|Isoform 3 of DNA repair and recombination protein RAD52 OS=Saccharomyces cerevisiae (strain ATCC 204508 / S288c) GN=RAD52	1	1	3	3	2	5.82085	1385000	325912	334195	3038840	3170160	1531880	2117090	4742380	3534610	1.08559e+06	311810	445650	2.38191e+06	3.03299e+06	2.04276e+06	1.65942e+06	4.53718e+06	4.71341e+06	974511	353415	438005	2.06871e+06	3.05071e+06	3.15537e+06	2.15567e+06	3.99883e+06	3.05087e+06	1	1	1	2.12282	8.63211	7.20397	2.21205	11.3148	6.96539
ERG10	P41338	Acetyl-CoA acetyltransferase OS=Saccharomyces cerevisiae (strain ATCC 204508 / S288c) GN=ERG10 PE=1 SV=3	1	1	3	3	4	6.05177	1069800	1036290	299405	7240870	5570440	2892370	4296850	6963310	6666150	899224	817960	451277	6.08634e+06	4.39684e+06	4.35951e+06	3.61173e+06	5.49625e+06	1.00475e+07	807213	927100	443535	5.28606e+06	4.42253e+06	6.73395e+06	4.69182e+06	4.8441e+06	6.50351e+06	1	1	1	6.54853	4.77028	15.1824	5.81237	5.225	14.6629
HOS3	Q02959	Histone deacetylase HOS3 OS=Saccharomyces cerevisiae (strain ATCC 204508 / S288c) GN=HOS3 PE=1 SV=1	1	1	3	3	3	5.95809	1494640	1536570	898698	5168370	5505550	2890080	5155250	12780400	7866850	1.55071e+06	1.14277e+06	1.1647e+06	5.36225e+06	4.09457e+06	3.74549e+06	5.34864e+06	9.505e+06	1.01953e+07	1.39204e+06	1.29525e+06	1.14472e+06	4.65718e+06	4.1185e+06	5.7855e+06	6.94815e+06	8.37719e+06	6.59916e+06	1	1	1	3.34559	3.17969	5.05409	4.99136	6.46761	5.76489
RRP14	P36080	Ribosomal RNA-processing protein 14 OS=Saccharomyces cerevisiae (strain ATCC 204508 / S288c) GN=RRP14 PE=1 SV=1	1	1	3	3	6	5.99336	2585410	2642410	1919190	17283000	14870100	4237270	9746260	12178300	14325000	2.25654e+06	2.23499e+06	2.59973e+06	1.50846e+07	1.25774e+07	5.73979e+06	8.50652e+06	1.03006e+07	1.94046e+07	2.02565e+06	2.53321e+06	2.55513e+06	1.31011e+07	1.26509e+07	8.86601e+06	1.10504e+07	9.0784e+06	1.25601e+07	1	1	1	6.46763	4.99401	3.46988	5.45525	3.58376	4.91564
VMA1	P17255	V-type proton ATPase catalytic subunit A OS=Saccharomyces cerevisiae (strain ATCC 204508 / S288c) GN=VMA1 PE=1 SV=3	1	1	3	3	9	6.63322	9050800	6405310	3185310	28785900	22769800	20529100	19186700	29049300	28446900	7.96168e+06	5.9539e+06	3.89559e+06	2.5322e+07	2.11651e+07	2.51068e+07	1.68779e+07	2.70021e+07	3.47901e+07	7.14701e+06	6.74833e+06	3.82876e+06	2.19924e+07	2.12888e+07	3.87814e+07	2.19252e+07	2.37982e+07	2.25188e+07	1	1	1	3.07715	3.15468	10.129	3.06774	3.52653	5.88148
APN1	P22936	DNA-(apurinic or apyrimidinic site) lyase 1 OS=Saccharomyces cerevisiae (strain ATCC 204508 / S288c) GN=APN1 PE=1 SV=4	1	1	3	3	5	5.96491	1449340	1836910	1213620	8667550	8533140	2105060	7842900	13144400	11534300	1.3757e+06	1.36347e+06	1.72255e+06	8.22717e+06	6.33381e+06	2.98782e+06	7.44442e+06	9.75657e+06	1.63712e+07	1.23494e+06	1.54539e+06	1.693e+06	7.1454e+06	6.37082e+06	4.61515e+06	9.67068e+06	8.59891e+06	1.05967e+07	1	1	1	5.78605	4.12246	2.72602	7.83091	5.56423	6.2591
OSM1	P21375	Fumarate reductase 2 OS=Saccharomyces cerevisiae (strain ATCC 204508 / S288c) GN=OSM1 PE=1 SV=3	1	1	3	3	2	5.61045	629194	603434	439885	2733930	4056370	1188780	2200550	3257830	2980460	619326	463341	582014	2.69105e+06	3.11464e+06	1.57288e+06	2.16604e+06	2.50149e+06	3.94346e+06	555955	525164	572031	2.33721e+06	3.13284e+06	2.42956e+06	2.81379e+06	2.20468e+06	2.55251e+06	1	1	1	4.20396	5.96546	4.24726	5.06119	4.19808	4.46219
SUB2	Q07478	ATP-dependent RNA helicase SUB2 OS=Saccharomyces cerevisiae (strain ATCC 204508 / S288c) GN=SUB2 PE=1 SV=1	1	1	3	3	3	5.83327	5795900	3412860	2406030	11183200	11299500	6457650	7735120	11130800	10456300	5.0263e+06	3.11695e+06	3.03782e+06	9.69826e+06	1.03198e+07	8.15334e+06	6.70803e+06	1.01657e+07	1.3202e+07	4.512e+06	3.53284e+06	2.98571e+06	8.42306e+06	1.03801e+07	1.25941e+07	8.71406e+06	8.9595e+06	8.54532e+06	1	1	1	1.86681	2.93817	4.21813	1.93131	2.53606	2.86207
MIS1	P09440	C-1-tetrahydrofolate synthase, mitochondrial OS=Saccharomyces cerevisiae (strain ATCC 204508 / S288c) GN=MIS1 PE=1 SV=1	1	1	3	3	5	6.31649	4439090	2375750	1457920	17424400	20849200	12707100	13542900	21311700	20343900	3.96586e+06	2.11704e+06	1.83131e+06	1.55669e+07	1.85788e+07	1.59615e+07	1.20992e+07	1.8991e+07	2.55541e+07	3.56007e+06	2.39952e+06	1.79989e+06	1.352e+07	1.86874e+07	2.4655e+07	1.57174e+07	1.67376e+07	1.65406e+07	1	1	1	3.79769	7.78798	13.6981	4.41493	6.9754	9.18976
EAF3	Q12432	Chromatin modification-related protein EAF3 OS=Saccharomyces cerevisiae (strain ATCC 204508 / S288c) GN=EAF3 PE=1 SV=1	1	1	3	3	5	6.12645	2442430	3475680	1655630	18519100	19620700	4912420	10794200	17224000	14504300	2.29955e+06	2.44216e+06	2.5027e+06	1.74357e+07	1.37863e+07	7.42576e+06	1.01627e+07	1.21023e+07	2.19251e+07	2.06425e+06	2.76802e+06	2.45977e+06	1.51431e+07	1.38669e+07	1.14703e+07	1.32019e+07	1.06663e+07	1.41916e+07	1	1	1	7.3359	5.00969	4.66315	6.39549	3.85342	5.76949
PIP2	P52960	Peroxisome proliferation transcriptional regulator OS=Saccharomyces cerevisiae (strain ATCC 204508 / S288c) GN=PIP2 PE=1 SV=1	1	1	3	3	2	5.4182	618602	1248650	385654	3602770	4129570	1197690	4038840	5279980	4943520	600659	838364	591547	3.49827e+06	2.77266e+06	1.83711e+06	3.92169e+06	3.54507e+06	7.58277e+06	539197	950226	581400	3.03829e+06	2.78886e+06	2.83771e+06	5.09447e+06	3.12443e+06	4.90814e+06	1	1	1	5.63483	2.93495	4.88083	9.44824	3.28809	8.44194
ERG13	P54839	Hydroxymethylglutaryl-CoA synthase OS=Saccharomyces cerevisiae (strain ATCC 204508 / S288c) GN=ERG13 PE=1 SV=1	1	1	3	3	9	6.91677	25658300	18640300	10324200	56409300	45459700	34828000	38045200	53416500	83572700	2.34717e+07	1.8203e+07	1.15571e+07	5.16021e+07	4.43933e+07	3.89871e+07	3.4803e+07	5.21635e+07	9.35529e+07	2.107e+07	2.06319e+07	1.13589e+07	4.4817e+07	4.46527e+07	6.02218e+07	4.52108e+07	4.59741e+07	6.05545e+07	1	1	1	2.12705	2.16426	5.30175	2.14574	2.2283	5.33104
CAT2	P32796|P32796-2	Carnitine O-acetyltransferase, mitochondrial OS=Saccharomyces cerevisiae (strain ATCC 204508 / S288c) GN=CAT2 PE=1 SV=2|Isoform Peroxisomal of Carnitine O-acetyltransferase, mitochondrial OS=Saccharomyces cerevisiae (strain ATCC 204508 / S288c) GN=CAT2	1	1	3	3	10	6.73949	8193620	4352810	3319290	18086700	25564700	15885300	10971600	27532500	19717900	8.36508e+06	3.59788e+06	3.93345e+06	1.84652e+07	2.11309e+07	1.88245e+07	1.12012e+07	2.27574e+07	2.33663e+07	7.50914e+06	4.07794e+06	3.86598e+06	1.60372e+07	2.12544e+07	2.90775e+07	1.45509e+07	2.00572e+07	1.51244e+07	1	1	1	2.1357	5.21203	7.52137	1.93776	4.91845	3.91218
GUT2	P32191	Glycerol-3-phosphate dehydrogenase, mitochondrial OS=Saccharomyces cerevisiae (strain ATCC 204508 / S288c) GN=GUT2 PE=1 SV=2	1	1	3	3	5	6.38104	11800600	5053920	4114970	25020700	19459300	16252400	16157300	21282700	21875800	9.44308e+06	5.32232e+06	4.88297e+06	2.00221e+07	2.04927e+07	1.92857e+07	1.29294e+07	2.2413e+07	2.59586e+07	8.47683e+06	6.03248e+06	4.79921e+06	1.73894e+07	2.06125e+07	2.97898e+07	1.67959e+07	1.97536e+07	1.68024e+07	1	1	1	2.0514	3.41692	6.20723	1.98139	3.27454	3.50107
RPS8A|RPS8B	P0CX39|P0CX40	40S ribosomal protein S8-A OS=Saccharomyces cerevisiae (strain ATCC 204508 / S288c) GN=RPS8A PE=1 SV=1|40S ribosomal protein S8-B OS=Saccharomyces cerevisiae (strain ATCC 204508 / S288c) GN=RPS8B PE=1 SV=1	1	1	3	3	8	7.55414	6094610	6696440	6676400	292545000	252673000	56282100	144001000	146906000	173991000	5.21647e+06	5.79378e+06	9.01559e+06	2.50394e+08	2.18613e+08	7.60015e+07	1.23253e+08	1.27103e+08	2.34952e+08	4.6827e+06	6.56683e+06	8.86094e+06	2.1747e+08	2.19891e+08	1.17396e+08	1.60111e+08	1.12022e+08	1.52079e+08	1	1	1	46.4411	33.485	13.2487	34.1921	17.0588	17.1628
RPL2A|RPL2B	P0CX45|P0CX46	60S ribosomal protein L2-A OS=Saccharomyces cerevisiae (strain ATCC 204508 / S288c) GN=RPL2A PE=1 SV=1|60S ribosomal protein L2-B OS=Saccharomyces cerevisiae (strain ATCC 204508 / S288c) GN=RPL2B PE=1 SV=1	1	1	3	3	12	8.11394	11107800	12862300	11230300	346970000	376570000	47380500	126289000	153241000	168733000	9.64769e+06	9.70576e+06	1.7135e+07	3.01361e+08	2.84156e+08	7.22925e+07	1.09688e+08	1.15634e+08	2.5745e+08	8.66051e+06	1.10008e+07	1.68411e+07	2.61736e+08	2.85816e+08	1.11667e+08	1.42491e+08	1.01914e+08	1.66641e+08	1	1	1	30.2218	25.9814	6.63064	16.4529	9.26421	9.89492
RPL1A|RPL1B	P0CX43|P0CX44	60S ribosomal protein L1-A OS=Saccharomyces cerevisiae (strain ATCC 204508 / S288c) GN=RPL1A PE=1 SV=1|60S ribosomal protein L1-B OS=Saccharomyces cerevisiae (strain ATCC 204508 / S288c) GN=RPL1B PE=1 SV=1	1	1	3	3	4	7.67413	3978220	3364380	1079590	78877800	96139100	40896800	39689900	39827700	40500500	3.21856e+06	2.69146e+06	1.66803e+06	6.38157e+07	7.69101e+07	6.31878e+07	3.21109e+07	3.18617e+07	6.25755e+07	2.88922e+06	3.05058e+06	1.63941e+06	5.54247e+07	7.73595e+07	9.76036e+07	4.17137e+07	2.80812e+07	4.05036e+07	1	1	1	19.1832	25.3589	59.5357	14.4377	9.20518	24.7062
RPS11A|RPS11B	P0CX47|P0CX48	40S ribosomal protein S11-A OS=Saccharomyces cerevisiae (strain ATCC 204508 / S288c) GN=RPS11A PE=1 SV=1|40S ribosomal protein S11-B OS=Saccharomyces cerevisiae (strain ATCC 204508 / S288c) GN=RPS11B PE=1 SV=1	1	1	3	3	6	7.3704	13265600	10099300	6154190	143245000	151570000	35550800	57511400	71704400	73161000	1.07211e+07	8.15034e+06	9.43566e+06	1.15769e+08	1.2232e+08	5.45068e+07	4.64802e+07	5.78669e+07	1.12171e+08	9.62413e+06	9.23783e+06	9.2738e+06	1.00547e+08	1.23035e+08	8.41943e+07	6.03802e+07	5.10008e+07	7.26056e+07	1	1	1	10.4474	13.3186	9.07873	6.27383	5.52086	7.82911
TIF1	P10081	ATP-dependent RNA helicase eIF4A OS=Saccharomyces cerevisiae (strain ATCC 204508 / S288c) GN=TIF1 PE=1 SV=3	1	1	3	3	7	6.78547	9433570	6536110	2633710	34019500	26264700	16231700	21896800	31708900	40750700	7.85327e+06	5.92467e+06	3.49018e+06	2.83206e+07	2.38077e+07	2.15102e+07	1.82287e+07	2.87426e+07	5.40027e+07	7.0497e+06	6.7152e+06	3.43031e+06	2.45968e+07	2.39468e+07	3.32259e+07	2.368e+07	2.53322e+07	3.49546e+07	1	1	1	3.48905	3.56606	9.68597	3.359	3.77237	10.1899
SBP1	P10080	Single-stranded nucleic acid-binding protein OS=Saccharomyces cerevisiae (strain ATCC 204508 / S288c) GN=SBP1 PE=1 SV=2	1	1	3	3	2	6.02399	1421370	1226510	853844	1941890	3691520	1942610	2175880	4673990	3803610	1.64385e+06	932166	971409	2.24584e+06	2.80561e+06	2.21009e+06	2.51646e+06	3.5523e+06	4.32732e+06	1.47564e+06	1.05654e+06	954745	1.95054e+06	2.822e+06	3.41383e+06	3.269e+06	3.13081e+06	2.80097e+06	1	1	1	1.32182	2.67098	3.57564	2.21531	2.96325	2.93374
LSP1	Q12230	Sphingolipid long chain base-responsive protein LSP1 OS=Saccharomyces cerevisiae (strain ATCC 204508 / S288c) GN=LSP1 PE=1 SV=1	1	1	3	3	3	6.18027	1549100	12073800	1642880	8235530	11246200	7106630	4863190	5990210	8647720	2.17648e+06	7.19426e+06	1.9624e+06	1.15709e+07	6.70113e+06	8.4888e+06	6.83277e+06	3.56931e+06	1.03296e+07	1.95378e+06	8.15419e+06	1.92874e+06	1.00495e+07	6.74029e+06	1.31123e+07	8.87611e+06	3.1458e+06	6.6861e+06	1	1	1	5.14361	0.826604	6.79837	4.54305	0.385789	3.46657
TED1	P40533	Protein TED1 OS=Saccharomyces cerevisiae (strain ATCC 204508 / S288c) GN=TED1 PE=1 SV=1	1	1	3	3	2	5.57807	473578	2106620	77535.3	2131860	1967030	801477	1755620	3467580	2561560	457168	1.01233e+06	167139	2.05799e+06	945252	1.72771e+06	1.69479e+06	1.66634e+06	5.52184e+06	410389	1.14741e+06	164272	1.78739e+06	950775	2.66872e+06	2.20161e+06	1.46862e+06	3.57415e+06	1	1	1	4.35535	0.82863	16.2457	5.36469	1.27995	21.7575
GVP36	P40531	Protein GVP36 OS=Saccharomyces cerevisiae (strain ATCC 204508 / S288c) GN=GVP36 PE=1 SV=1	1	1	3	3	8	7.04193	127970000	49297500	4302500	5612700	5870210	5606920	5564040	8767510	8907230	8.79287e+07	3.94112e+07	7.83257e+06	3.85651e+06	4.69297e+06	1.02072e+07	3.82307e+06	7.00923e+06	1.62153e+07	7.89316e+07	4.46698e+07	7.69821e+06	3.34942e+06	4.72039e+06	1.57667e+07	4.96636e+06	6.17756e+06	1.04958e+07	1	1	1	0.0424345	0.105673	2.0481	0.0629199	0.138294	1.36341
ACT1	P60010	Actin OS=Saccharomyces cerevisiae (strain ATCC 204508 / S288c) GN=ACT1 PE=1 SV=1	1	1	3	3	4	7.01936	3248100	3541840	2018280	18228200	16526700	8773210	11837800	18168400	18166100	3.12009e+06	2.96077e+06	2.51343e+06	1.75098e+07	1.38154e+07	1.09256e+07	1.13713e+07	1.51877e+07	2.26229e+07	2.80084e+06	3.35582e+06	2.47032e+06	1.52075e+07	1.38961e+07	1.68763e+07	1.47719e+07	1.33856e+07	1.46432e+07	1	1	1	5.42963	4.14088	6.83162	5.27409	3.98878	5.92767
YGL081W	P53156	Uncharacterized protein YGL081W OS=Saccharomyces cerevisiae (strain ATCC 204508 / S288c) GN=YGL081W PE=3 SV=1	1	1	3	3	2	5.62605	371245	599826	343576	2217220	2211400	454212	724648	4227380	1600410	432296	330946	534775	2.58184e+06	1.22011e+06	706980	843815	2.3324e+06	2.49103e+06	388062	375103	525602	2.24236e+06	1.22724e+06	1.09204e+06	1.09616e+06	2.05565e+06	1.61238e+06	1	1	1	5.77835	3.27173	2.0777	2.8247	5.48022	3.06769
TRP3	P00937	Multifunctional tryptophan biosynthesis protein OS=Saccharomyces cerevisiae (strain ATCC 204508 / S288c) GN=TRP3 PE=1 SV=2	1	1	3	3	2	5.64485	1293320	1033980	447719	4038820	4591780	2185870	2822250	3753410	4011950	1.14029e+06	855792	613535	3.56094e+06	3.80047e+06	2.99542e+06	2.48832e+06	3.10658e+06	5.49781e+06	1.02361e+06	969979	603010	3.09272e+06	3.82267e+06	4.6269e+06	3.23245e+06	2.73797e+06	3.55859e+06	1	1	1	3.02137	3.94099	7.67301	3.15788	2.82271	5.90138
ERV29	P53337	ER-derived vesicles protein ERV29 OS=Saccharomyces cerevisiae (strain ATCC 204508 / S288c) GN=ERV29 PE=1 SV=1	1	1	3	3	2	5.65105	144951	178559	211370	1389010	1075220	509715	1167240	2550160	1559790	151515	146138	247074	1.45191e+06	879992	595816	1.2201e+06	2.08713e+06	1.82327e+06	136012	165637	242836	1.261e+06	885134	920331	1.58497e+06	1.83948e+06	1.18016e+06	1	1	1	9.27128	5.34382	3.78993	11.6532	11.1055	4.85989
LAP3	Q01532|Q01532-2	Cysteine proteinase 1, mitochondrial OS=Saccharomyces cerevisiae (strain ATCC 204508 / S288c) GN=LAP3 PE=1 SV=3|Isoform Cytoplasmic of Cysteine proteinase 1, mitochondrial OS=Saccharomyces cerevisiae (strain ATCC 204508 / S288c) GN=LAP3	1	1	3	3	3	5.99191	1121290	794930	585716	6432140	4466080	2813100	3504960	5759880	7661450	1.01386e+06	771409	667531	5.81588e+06	4.33393e+06	3.20604e+06	3.16915e+06	5.58945e+06	8.73163e+06	910118	874338	656080	5.05116e+06	4.35926e+06	4.95224e+06	4.11689e+06	4.92624e+06	5.65177e+06	1	1	1	5.55	4.98578	7.54823	4.52346	5.63426	8.61445
NOP16	P40007	Nucleolar protein 16 OS=Saccharomyces cerevisiae (strain ATCC 204508 / S288c) GN=NOP16 PE=1 SV=1	1	1	3	3	2	6.03906	984294	659715	502637	5870360	5719550	1578000	2568420	3965800	3473090	817071	546127	731446	4.87304e+06	4.73477e+06	2.29633e+06	2.13207e+06	3.28298e+06	5.0541e+06	733466	618996	718899	4.23229e+06	4.76244e+06	3.54705e+06	2.76966e+06	2.89344e+06	3.27139e+06	1	1	1	5.77026	7.69381	4.934	3.77613	4.67441	4.55056
SNC2	P33328	Synaptobrevin homolog 2 OS=Saccharomyces cerevisiae (strain ATCC 204508 / S288c) GN=SNC2 PE=1 SV=2	1	1	3	3	2	6.4142	11742900	5901270	3230620	1668020	1418690	1398140	1284210	1739690	2127510	9.93057e+06	5.98752e+06	3.76518e+06	1.41059e+06	1.43942e+06	1.62949e+06	1.08601e+06	1.76512e+06	2.47954e+06	8.91444e+06	6.78643e+06	3.70059e+06	1.22511e+06	1.44784e+06	2.517e+06	1.41078e+06	1.55568e+06	1.60495e+06	1	1	1	0.13743	0.213343	0.680161	0.158258	0.229234	0.4337
CBF5	P33322	H/ACA ribonucleoprotein complex subunit 4 OS=Saccharomyces cerevisiae (strain ATCC 204508 / S288c) GN=CBF5 PE=1 SV=1	1	1	3	3	4	6.44731	880919	1240570	1071010	15659700	13956500	2761030	12081600	17485500	16639000	821991	948728	1.50087e+06	1.46122e+07	1.06733e+07	3.86919e+06	1.12734e+07	1.33721e+07	2.33172e+07	737882	1.07532e+06	1.47512e+06	1.26908e+07	1.07356e+07	5.97657e+06	1.46447e+07	1.17854e+07	1.50926e+07	1	1	1	17.199	9.98369	4.05158	19.847	10.96	10.2315
GDH2	P33327	NAD-specific glutamate dehydrogenase OS=Saccharomyces cerevisiae (strain ATCC 204508 / S288c) GN=GDH2 PE=1 SV=1	1	1	3	3	6	6.08513	2636650	2878400	2481610	20003100	15272500	7263720	11215900	15113500	18853900	2.51139e+06	2.63754e+06	2.84331e+06	1.90528e+07	1.39945e+07	8.32244e+06	1.06831e+07	1.38488e+07	2.16019e+07	2.25442e+06	2.98946e+06	2.79454e+06	1.65476e+07	1.40763e+07	1.28553e+07	1.38778e+07	1.22056e+07	1.39824e+07	1	1	1	7.34008	4.70863	4.60015	6.15584	4.08287	5.00347
NUS1	Q12063	Dehydrodolichyl diphosphate synthase complex subunit NUS1 OS=Saccharomyces cerevisiae (strain ATCC 204508 / S288c) GN=NUS1 PE=1 SV=1	1	1	3	3	3	5.81798	701991	734382	627852	4659220	4881990	2091430	3436260	7297170	6494110	747790	590277	733289	4.96319e+06	3.92402e+06	2.44265e+06	3.66045e+06	5.86527e+06	7.58469e+06	671274	669037	720711	4.31059e+06	3.94694e+06	3.77306e+06	4.7551e+06	5.16934e+06	4.90938e+06	1	1	1	6.42151	5.89944	5.2352	7.0837	7.72653	6.81186
HHF1	P02309	Histone H4 OS=Saccharomyces cerevisiae (strain ATCC 204508 / S288c) GN=HHF1 PE=1 SV=2	1	1	3	3	8	7.93441	13970700	31709800	14200500	103433000	106865000	20271700	193226000	311757000	264179000	1.40174e+07	2.04178e+07	2.19805e+07	1.03779e+08	6.881e+07	3.13779e+07	1.93872e+08	2.00739e+08	4.08914e+08	1.25831e+07	2.31422e+07	2.16034e+07	9.01333e+07	6.92121e+07	4.84681e+07	2.5185e+08	1.76921e+08	2.6468e+08	1	1	1	7.16303	2.99073	2.24354	20.0149	7.64495	12.2518
BRE1	Q07457	E3 ubiquitin-protein ligase BRE1 OS=Saccharomyces cerevisiae (strain ATCC 204508 / S288c) GN=BRE1 PE=1 SV=1	1	1	3	3	12	6.25453	6686630	5234430	4801290	36918300	40059200	12751600	22171300	42304500	31537500	6.28395e+06	4.18783e+06	6.38577e+06	3.4695e+07	3.20495e+07	1.69598e+07	2.08361e+07	3.38459e+07	4.19452e+07	5.64096e+06	4.74661e+06	6.27623e+06	3.0133e+07	3.22368e+07	2.61971e+07	2.70671e+07	2.98299e+07	2.71501e+07	1	1	1	5.34183	6.79155	4.17401	4.79833	6.28448	4.32587
RPN3	P40016	26S proteasome regulatory subunit RPN3 OS=Saccharomyces cerevisiae (strain ATCC 204508 / S288c) GN=RPN3 PE=1 SV=5	1	1	3	3	2	5.9557	1113630	699629	455749	5438830	4519680	1907050	2406300	4112180	4621200	952885	621847	599253	4.65377e+06	4.0172e+06	2.50753e+06	2.05897e+06	3.65501e+06	6.0763e+06	855383	704820	588973	4.04186e+06	4.04068e+06	3.87328e+06	2.6747e+06	3.22132e+06	3.93304e+06	1	1	1	4.7252	5.73292	6.57632	3.1269	4.57042	6.67779
REP2	P03872	Partitioning protein REP2 OS=Saccharomyces cerevisiae (strain ATCC 204508 / S288c) GN=REP2 PE=1 SV=1	1	1	3	3	2	5.60068	641285	336041	166960	2060750	1265410	557345	1749100	3116520	2328500	463421	292314	265601	1.48919e+06	1.10075e+06	886629	1.26398e+06	2.71099e+06	3.7042e+06	416003	331317	261045	1.29338e+06	1.10718e+06	1.36954e+06	1.64197e+06	2.38932e+06	2.39763e+06	1	1	1	3.10907	3.34176	5.24637	3.94702	7.21157	9.18475
REP1	P03871	Partitioning protein REP1 OS=Saccharomyces cerevisiae (strain ATCC 204508 / S288c) GN=REP1 PE=1 SV=1	1	1	3	3	2	5.7277	319205	368422	291771	3590510	2997660	1424170	1644370	2823540	2414980	314744	307139	354949	3.54033e+06	2.49903e+06	1.73255e+06	1.62139e+06	2.35387e+06	2.9379e+06	282538	348120	348860	3.07482e+06	2.51363e+06	2.67619e+06	2.10627e+06	2.07458e+06	1.90163e+06	1	1	1	10.8828	7.22059	7.67126	7.45479	5.95937	5.45099
ERG27	Q12452	3-keto-steroid reductase OS=Saccharomyces cerevisiae (strain ATCC 204508 / S288c) GN=ERG27 PE=1 SV=1	1	1	3	3	3	6.04318	1977910	2001620	1219720	6094080	8479830	3297240	4241150	8747050	7116370	2.08767e+06	1.48079e+06	1.56204e+06	6.43227e+06	6.27334e+06	4.22263e+06	4.47651e+06	6.47103e+06	9.11362e+06	1.87406e+06	1.67837e+06	1.53525e+06	5.5865e+06	6.31e+06	6.52252e+06	5.81521e+06	5.70322e+06	5.89902e+06	1	1	1	2.98097	3.7596	4.24852	3.10301	3.39807	3.8424
SDS24	P38314	Protein SDS24 OS=Saccharomyces cerevisiae (strain ATCC 204508 / S288c) GN=SDS24 PE=1 SV=1	1	1	3	3	2	6.22655	1799200	2302310	1384770	5131770	5800430	3107210	3467080	6050580	6728410	1.97201e+06	1.85334e+06	1.56948e+06	5.62466e+06	4.66931e+06	3.52168e+06	3.80008e+06	4.87067e+06	7.6259e+06	1.77023e+06	2.10063e+06	1.54256e+06	4.88508e+06	4.69659e+06	5.43979e+06	4.9365e+06	4.29275e+06	4.93606e+06	1	1	1	2.75958	2.2358	3.52647	2.78863	2.04355	3.19992
YPK2	P18961	Serine/threonine-protein kinase YPK2/YKR2 OS=Saccharomyces cerevisiae (strain ATCC 204508 / S288c) GN=YPK2 PE=1 SV=1	1	1	3	3	3	5.64063	923864	855365	586027	11696500	11674500	2822760	2558810	5311010	5536340	878449	654594	805358	1.11215e+07	8.93426e+06	3.87923e+06	2.43303e+06	4.06441e+06	7.60841e+06	788564	741936	791543	9.65918e+06	8.98647e+06	5.99208e+06	3.16062e+06	3.58215e+06	4.92474e+06	1	1	1	12.2491	12.1122	7.57013	4.00807	4.82812	6.2217
TYS1	P36421	Tyrosine--tRNA ligase, cytoplasmic OS=Saccharomyces cerevisiae (strain ATCC 204508 / S288c) GN=TYS1 PE=1 SV=3	1	1	3	3	4	6.18187	1381610	1004060	742061	6321380	7178850	4104060	5229360	8600270	7454860	1.32251e+06	868054	896681	6.05099e+06	6.20643e+06	4.95921e+06	5.00568e+06	7.43531e+06	9.0082e+06	1.18719e+06	983878	881300	5.25535e+06	6.2427e+06	7.66028e+06	6.50262e+06	6.55309e+06	5.83079e+06	1	1	1	4.42672	6.34499	8.69202	5.47733	6.66046	6.61612
RPO31	P04051	DNA-directed RNA polymerase III subunit RPC1 OS=Saccharomyces cerevisiae (strain ATCC 204508 / S288c) GN=RPO31 PE=1 SV=1	1	1	3	3	4	5.79921	821641	2288800	1541540	5392770	6985200	2503380	4933530	11830900	8943700	1.09862e+06	1.4907e+06	1.77013e+06	7.21072e+06	4.54947e+06	2.8746e+06	6.59666e+06	7.70549e+06	1.02699e+07	986209	1.6896e+06	1.73977e+06	6.2626e+06	4.57606e+06	4.44028e+06	8.5694e+06	6.7912e+06	6.64748e+06	1	1	1	6.35017	2.70836	2.55222	8.68923	4.01941	3.8209
RPO21	P04050	DNA-directed RNA polymerase II subunit RPB1 OS=Saccharomyces cerevisiae (strain ATCC 204508 / S288c) GN=RPO21 PE=1 SV=2	1	1	3	3	29	7.23095	11500100	12717600	13099400	105993000	127382000	26516000	272925000	304661000	184722000	1.00074e+07	9.70333e+06	1.97296e+07	9.22349e+07	9.71905e+07	3.99369e+07	2.37499e+08	2.32452e+08	2.78218e+08	8.98338e+06	1.0998e+07	1.93911e+07	8.01071e+07	9.77584e+07	6.16888e+07	3.08523e+08	2.0487e+08	1.80084e+08	1	1	1	8.91726	8.88871	3.18129	34.3437	18.6279	9.2869
RPL24A	P04449	60S ribosomal protein L24-A OS=Saccharomyces cerevisiae (strain ATCC 204508 / S288c) GN=RPL24A PE=1 SV=1	1	1	3	3	2	6.50297	1445120	823947	1110940	10071400	9365670	1870620	4910800	6308010	7262850	1.16501e+06	754969	1.50396e+06	8.11922e+06	8.58161e+06	2.53239e+06	3.95892e+06	5.77992e+06	9.83224e+06	1.0458e+06	855704	1.47816e+06	7.05164e+06	8.63175e+06	3.91168e+06	5.14284e+06	5.09411e+06	6.36417e+06	1	1	1	6.74282	10.0873	2.64632	4.91761	5.95313	4.30547
RPS2	P25443	40S ribosomal protein S2 OS=Saccharomyces cerevisiae (strain ATCC 204508 / S288c) GN=RPS2 PE=1 SV=3	1	1	3	3	5	7.47419	2492570	2292820	1735650	51514700	54896900	14970400	34014800	77828200	58577000	2.42525e+06	1.70429e+06	2.39982e+06	5.01234e+07	4.08057e+07	2.06991e+07	3.30961e+07	5.78509e+07	8.09924e+07	2.17709e+06	1.93169e+06	2.35866e+06	4.35328e+07	4.10442e+07	3.1973e+07	4.29935e+07	5.09867e+07	5.24244e+07	1	1	1	19.9958	21.2478	13.5556	19.7481	26.3948	22.2264
PDC1	P06169	Pyruvate decarboxylase isozyme 1 OS=Saccharomyces cerevisiae (strain ATCC 204508 / S288c) GN=PDC1 PE=1 SV=7	1	1	3	3	7	7.02218	13523800	10191700	5240620	107895000	81580600	51587900	54275600	63666900	77254700	1.11517e+07	9.61191e+06	6.7387e+06	8.89703e+07	7.69396e+07	6.63348e+07	4.47557e+07	6.0045e+07	9.93387e+07	1.00107e+07	1.08944e+07	6.6231e+06	7.72718e+07	7.73892e+07	1.02465e+08	5.81399e+07	5.29204e+07	6.42995e+07	1	1	1	7.71895	7.10356	15.4708	5.8078	4.85757	9.70836
RAD16	P31244	DNA repair protein RAD16 OS=Saccharomyces cerevisiae (strain ATCC 204508 / S288c) GN=RAD16 PE=1 SV=1	1	1	3	3	4	5.70823	1811680	2276540	1300660	6631810	7324100	2482390	8861830	10534000	10326700	1.68348e+06	1.79036e+06	1.7798e+06	6.16253e+06	5.75996e+06	3.39686e+06	8.23475e+06	8.28435e+06	1.41309e+07	1.51122e+06	2.02925e+06	1.74927e+06	5.35223e+06	5.79362e+06	5.24699e+06	1.06974e+07	7.30138e+06	9.14657e+06	1	1	1	3.54166	2.85506	2.99953	7.07861	3.59807	5.22879
TUB2	P02557	Tubulin beta chain OS=Saccharomyces cerevisiae (strain ATCC 204508 / S288c) GN=TUB2 PE=1 SV=2	1	1	3	3	3	6.34867	4276240	4625870	3450410	20592100	16810900	12111100	8248360	13154800	13003700	4.30118e+06	4.15087e+06	3.82296e+06	2.07122e+07	1.50847e+07	1.34188e+07	8.29646e+06	1.1804e+07	1.44077e+07	3.86107e+06	4.70472e+06	3.75738e+06	1.79888e+07	1.51729e+07	2.07274e+07	1.07775e+07	1.04034e+07	9.32577e+06	1	1	1	4.65902	3.22503	5.51645	2.79133	2.21128	2.48199
YDR115W	Q04598	54S ribosomal protein L34, mitochondrial OS=Saccharomyces cerevisiae (strain ATCC 204508 / S288c) GN=YDR115W PE=1 SV=1	1	1	3	3	2	6.70868	864805	605777	1341890	4590730	3628340	2657450	2835030	2569880	4196000	826778	728772	1.16672e+06	4.38887e+06	4.36502e+06	2.31055e+06	2.71037e+06	3.09166e+06	3.64826e+06	742179	826011	1.14671e+06	3.81178e+06	4.39053e+06	3.56901e+06	3.5209e+06	2.72482e+06	2.36143e+06	1	1	1	5.13593	5.31534	3.1124	4.74401	3.29877	2.05931
NSA1	P53136	Ribosome biogenesis protein NSA1 OS=Saccharomyces cerevisiae (strain ATCC 204508 / S288c) GN=NSA1 PE=1 SV=1	1	1	3	3	2	5.99642	549781	279818	322334	4867570	5467690	2038850	2937360	4142150	3870740	473536	258955	404384	4.19253e+06	5.06002e+06	2.55784e+06	2.53e+06	3.83331e+06	4.85604e+06	425083	293507	397448	3.64126e+06	5.08959e+06	3.95099e+06	3.2866e+06	3.37847e+06	3.1432e+06	1	1	1	8.566	17.3406	9.94091	7.73167	11.5107	7.90845
SEC18	P18759	Vesicular-fusion protein SEC18 OS=Saccharomyces cerevisiae (strain ATCC 204508 / S288c) GN=SEC18 PE=1 SV=2	1	1	3	3	3	5.72003	2468750	1358080	1327030	5503430	5185170	3764290	4507560	8177160	6545570	2.28676e+06	1.28407e+06	1.51521e+06	5.09774e+06	4.90261e+06	4.29808e+06	4.17528e+06	7.73156e+06	7.47375e+06	2.05278e+06	1.45541e+06	1.48921e+06	4.42745e+06	4.93126e+06	6.63906e+06	5.4239e+06	6.81418e+06	4.83758e+06	1	1	1	2.15681	3.38824	4.45809	2.64223	4.68198	3.24841
YGL108C	P53139	Uncharacterized protein YGL108C OS=Saccharomyces cerevisiae (strain ATCC 204508 / S288c) GN=YGL108C PE=1 SV=1	1	1	3	3	2	5.94007	1128280	1101100	841314	7263270	7054330	1855850	5016560	6995480	6573110	997499	887035	1.18127e+06	6.42137e+06	5.6829e+06	2.60575e+06	4.43508e+06	5.63549e+06	9.22914e+06	895432	1.00539e+06	1.161e+06	5.57704e+06	5.71611e+06	4.025e+06	5.76139e+06	4.96682e+06	5.97379e+06	1	1	1	6.22832	5.68545	3.46682	6.43421	4.94018	5.14537
PDR16	P53860	Phosphatidylinositol transfer protein PDR16 OS=Saccharomyces cerevisiae (strain ATCC 204508 / S288c) GN=PDR16 PE=1 SV=1	1	1	3	3	3	6.0754	5981170	3265500	2365130	6409780	7806740	3128230	5434860	10652300	10200000	5.50252e+06	2.75028e+06	3.05247e+06	5.89683e+06	6.57502e+06	4.03734e+06	4.99993e+06	8.97162e+06	1.31643e+07	4.93949e+06	3.11725e+06	3.00011e+06	5.12147e+06	6.61344e+06	6.23631e+06	6.49516e+06	7.9071e+06	8.52092e+06	1	1	1	1.03684	2.12156	2.07869	1.31495	2.53656	2.8402
CNM67	P53865	Chaotic nuclear migration protein 67 OS=Saccharomyces cerevisiae (strain ATCC 204508 / S288c) GN=CNM67 PE=1 SV=1	1	1	3	3	2	5.94825	600798	587691	643360	3061050	5015240	2369980	1983320	5175810	2839620	717877	435841	726028	3.65756e+06	3.71938e+06	2.67451e+06	2.36981e+06	3.83846e+06	3.20449e+06	644422	493995	713574	3.17664e+06	3.74112e+06	4.1312e+06	3.07851e+06	3.38302e+06	2.07419e+06	1	1	1	4.92944	7.57319	5.78945	4.77716	6.84828	2.90676
ARB1	P40024	ABC transporter ATP-binding protein ARB1 OS=Saccharomyces cerevisiae (strain ATCC 204508 / S288c) GN=ARB1 PE=1 SV=1	1	1	3	3	8	6.57822	3982550	7578840	3095070	25125500	25551100	5631120	18396600	30899500	29763300	3.9439e+06	5.06661e+06	4.6751e+06	2.48817e+07	1.70814e+07	8.5058e+06	1.82181e+07	2.06569e+07	4.49574e+07	3.54035e+06	5.74264e+06	4.5949e+06	2.161e+07	1.71812e+07	1.31386e+07	2.36662e+07	1.82059e+07	2.90998e+07	1	1	1	6.10393	2.99187	2.85938	6.6847	3.1703	6.33307
CDC60	P26637	Leucine--tRNA ligase, cytoplasmic OS=Saccharomyces cerevisiae (strain ATCC 204508 / S288c) GN=CDC60 PE=1 SV=1	1	1	3	3	6	6.15807	1703490	1708380	1546220	12941900	10510800	4416990	16223600	27621500	24664500	1.62473e+06	1.46116e+06	1.89547e+06	1.23435e+07	8.98978e+06	5.41467e+06	1.54735e+07	2.36244e+07	3.02356e+07	1.45848e+06	1.65612e+06	1.86296e+06	1.07205e+07	9.04231e+06	8.36382e+06	2.01008e+07	2.08213e+07	1.95707e+07	1	1	1	7.35045	5.45993	4.48954	13.782	12.5723	10.5052
RPS27A|RPS27B	P35997|P38711	40S ribosomal protein S27-A OS=Saccharomyces cerevisiae (strain ATCC 204508 / S288c) GN=RPS27A PE=1 SV=1|40S ribosomal protein S27-B OS=Saccharomyces cerevisiae (strain ATCC 204508 / S288c) GN=RPS27B PE=1 SV=1	1	1	3	3	3	6.64401	6473870	6897900	2649320	26209500	18131700	11995400	11470700	19827900	14337000	5.65963e+06	5.56247e+06	3.75803e+06	2.2913e+07	1.46214e+07	1.70153e+07	1.0028e+07	1.59892e+07	2.03369e+07	5.08052e+06	6.30466e+06	3.69356e+06	1.99002e+07	1.47068e+07	2.62829e+07	1.30269e+07	1.4092e+07	1.31635e+07	1	1	1	3.91697	2.33269	7.11586	2.56408	2.23518	3.56392
TMA22	P47089	Translation machinery-associated protein 22 OS=Saccharomyces cerevisiae (strain ATCC 204508 / S288c) GN=TMA22 PE=1 SV=1	1	1	3	3	2	6.59823	678961	455423	665962	7896070	6473760	1361880	4588340	9024730	7305820	592022	386851	899140	6.88501e+06	5.49902e+06	1.83873e+06	4.00082e+06	7.66589e+06	9.86386e+06	531445	438468	883717	5.97971e+06	5.53115e+06	2.8402e+06	5.19726e+06	6.7563e+06	6.38464e+06	1	1	1	11.2518	12.6147	3.21393	9.7795	15.4089	7.22476
SMC1	P32908	Structural maintenance of chromosomes protein 1 OS=Saccharomyces cerevisiae (strain ATCC 204508 / S288c) GN=SMC1 PE=1 SV=1	1	1	3	3	27	7.15628	24711100	17189600	15099300	198437000	171046000	72598900	150356000	188535000	174000000	2.06008e+07	1.57597e+07	1.97553e+07	1.6543e+08	1.56817e+08	9.49852e+07	1.25347e+08	1.72851e+08	2.27654e+08	1.84929e+07	1.78625e+07	1.94164e+07	1.43678e+08	1.57734e+08	1.4672e+08	1.62832e+08	1.52342e+08	1.47355e+08	1	1	1	7.76938	8.83045	7.55649	8.8051	8.52861	7.5892
TIF4631	P39935	Eukaryotic initiation factor 4F subunit p150 OS=Saccharomyces cerevisiae (strain ATCC 204508 / S288c) GN=TIF4631 PE=1 SV=2	1	1	3	3	3	5.93638	753273	1100090	826489	5331280	5560890	1727640	5649580	11270500	8880120	798934	805529	1.06421e+06	5.65444e+06	4.0719e+06	2.22455e+06	5.99204e+06	8.2527e+06	1.14342e+07	717184	913010	1.04595e+06	4.91095e+06	4.0957e+06	3.43617e+06	7.78396e+06	7.27349e+06	7.40111e+06	1	1	1	6.84754	4.48592	3.28521	10.8535	7.96649	7.07596
RPL35A|RPL35B	P0CX84|P0CX85	60S ribosomal protein L35-A OS=Saccharomyces cerevisiae (strain ATCC 204508 / S288c) GN=RPL35A PE=1 SV=1|60S ribosomal protein L35-B OS=Saccharomyces cerevisiae (strain ATCC 204508 / S288c) GN=RPL35B PE=1 SV=1	1	1	3	3	4	7.89808	8414670	6732610	7287040	64454200	67343700	30182000	53463700	65733700	60686500	7.74323e+06	6.13896e+06	8.6847e+06	5.93111e+07	6.14056e+07	3.59709e+07	4.91976e+07	5.99376e+07	7.23262e+07	6.95092e+06	6.95808e+06	8.53572e+06	5.15124e+07	6.17645e+07	5.55628e+07	6.39102e+07	5.28258e+07	4.6815e+07	1	1	1	7.41088	8.87666	6.50944	9.19449	7.59201	5.4846
RPL19A|RPL19B	P0CX82|P0CX83	60S ribosomal protein L19-A OS=Saccharomyces cerevisiae (strain ATCC 204508 / S288c) GN=RPL19A PE=1 SV=1|60S ribosomal protein L19-B OS=Saccharomyces cerevisiae (strain ATCC 204508 / S288c) GN=RPL19B PE=1 SV=1	1	1	3	3	6	7.55915	1762460	4915090	2415750	76027900	83058500	8523420	59041700	71599600	82364300	1.71738e+06	3.09804e+06	3.93322e+06	7.40834e+07	5.23528e+07	1.38775e+07	5.75316e+07	4.51301e+07	1.34102e+08	1.54165e+06	3.51141e+06	3.86575e+06	6.43423e+07	5.26587e+07	2.14359e+07	7.47364e+07	3.97753e+07	8.6801e+07	1	1	1	41.7359	14.9965	5.54509	48.4781	11.3274	22.4538
SUP45	P12385	Eukaryotic peptide chain release factor subunit 1 OS=Saccharomyces cerevisiae (strain ATCC 204508 / S288c) GN=SUP45 PE=1 SV=2	1	1	3	3	6	6.18436	12752600	3966210	2935470	17925400	16212700	7572960	11349500	23120300	20342000	9.87254e+06	3.69669e+06	4.06828e+06	1.38771e+07	1.5111e+07	1.04954e+07	8.78632e+06	2.15492e+07	2.8192e+07	8.86235e+06	4.18993e+06	3.99849e+06	1.20524e+07	1.51993e+07	1.62118e+07	1.14139e+07	1.89923e+07	1.8248e+07	1	1	1	1.35996	3.62757	4.05448	1.2879	4.53283	4.56373
SSC1	P0CS90	Heat shock protein SSC1, mitochondrial OS=Saccharomyces cerevisiae (strain ATCC 204508 / S288c) GN=SSC1 PE=1 SV=1	1	1	3	3	13	6.92873	17904200	12276900	5717350	33329700	35320000	31286800	28212500	56519700	40937100	1.70178e+07	1.02962e+07	7.17233e+06	3.16795e+07	2.96215e+07	3.92488e+07	2.68157e+07	4.74009e+07	5.1355e+07	1.52764e+07	1.167e+07	7.0493e+06	2.75141e+07	2.97946e+07	6.0626e+07	3.48349e+07	4.17766e+07	3.32408e+07	1	1	1	1.80108	2.5531	8.60029	2.2803	3.57984	4.71548
YTA7	P40340	Tat-binding homolog 7 OS=Saccharomyces cerevisiae (strain ATCC 204508 / S288c) GN=YTA7 PE=1 SV=2	1	1	3	3	32	7.9559	10127000	14152700	9599000	146898000	105209000	16381100	317849000	245510000	329257000	7.69713e+06	1.17203e+07	1.52503e+07	1.11651e+08	8.7127e+07	2.60253e+07	2.41584e+08	2.03315e+08	5.23103e+08	6.90953e+06	1.32841e+07	1.49887e+07	9.69705e+07	8.76361e+07	4.02002e+07	3.1383e+08	1.79191e+08	3.38592e+08	1	1	1	14.0343	6.59705	2.68203	45.4199	13.4891	22.5898
RFC2	P40348	Replication factor C subunit 2 OS=Saccharomyces cerevisiae (strain ATCC 204508 / S288c) GN=RFC2 PE=1 SV=1	1	1	3	3	2	5.92217	516803	792521	514814	5159770	5569080	2320110	2906440	6937390	5627110	592581	574833	619009	5.91633e+06	4.03938e+06	2.78968e+06	3.3326e+06	5.03185e+06	6.766e+06	531946	651533	608390	5.13841e+06	4.06298e+06	4.30911e+06	4.32922e+06	4.4348e+06	4.37946e+06	1	1	1	9.65964	6.23604	7.0828	8.13846	6.80671	7.19845
RPS25B|RPS25A	P0C0T4|Q3E792	40S ribosomal protein S25-B OS=Saccharomyces cerevisiae (strain ATCC 204508 / S288c) GN=RPS25B PE=1 SV=1|40S ribosomal protein S25-A OS=Saccharomyces cerevisiae (strain ATCC 204508 / S288c) GN=RPS25A PE=1 SV=1	1	1	3	3	5	7.38782	6890250	8150580	5835770	83867500	93517000	30031500	43800900	60680400	55793600	6.62874e+06	6.41376e+06	7.70865e+06	8.06844e+07	7.35893e+07	3.96695e+07	4.21385e+07	4.77499e+07	7.36995e+07	5.95047e+06	7.26954e+06	7.57641e+06	7.00754e+07	7.40193e+07	6.12759e+07	5.474e+07	4.20842e+07	4.77039e+07	1	1	1	11.7765	10.1821	8.08771	9.19928	5.78911	6.29636
INO80	P53115	Putative DNA helicase INO80 OS=Saccharomyces cerevisiae (strain ATCC 204508 / S288c) GN=INO80 PE=1 SV=1	1	1	3	3	4	5.66964	821748	821221	923253	5084600	6361700	1662020	3313490	6925660	5246990	860872	624581	1.15876e+06	5.32668e+06	4.8384e+06	2.08597e+06	3.47125e+06	5.26732e+06	6.58539e+06	772785	707919	1.13888e+06	4.62629e+06	4.86668e+06	3.22211e+06	4.50932e+06	4.64233e+06	4.26256e+06	1	1	1	5.98651	6.87463	2.82919	5.83516	6.55772	3.74277
NOC2	P39744	Nucleolar complex protein 2 OS=Saccharomyces cerevisiae (strain ATCC 204508 / S288c) GN=NOC2 PE=1 SV=2	1	1	3	3	2	6.1396	2131810	1854040	1187680	10438200	10878700	4956540	5360160	10574000	9730800	2.09604e+06	1.5019e+06	1.49116e+06	1.02631e+07	8.81252e+06	6.22307e+06	5.27022e+06	8.56569e+06	1.22173e+07	1.88157e+06	1.7023e+06	1.46558e+06	8.91358e+06	8.86401e+06	9.61251e+06	6.84628e+06	7.54934e+06	7.90795e+06	1	1	1	4.73732	5.20707	6.55882	3.63861	4.43478	5.39576
PDI1	P17967	Protein disulfide-isomerase OS=Saccharomyces cerevisiae (strain ATCC 204508 / S288c) GN=PDI1 PE=1 SV=2	1	1	3	3	5	6.38914	2125380	2448790	1660350	14117000	14844900	7656580	10837800	31608200	16578400	2.33035e+06	1.76279e+06	2.10361e+06	1.54784e+07	1.06863e+07	9.70065e+06	1.1883e+07	2.27535e+07	2.10043e+07	2.0919e+06	1.998e+06	2.06753e+06	1.34432e+07	1.07487e+07	1.49842e+07	1.54366e+07	2.00537e+07	1.35956e+07	1	1	1	6.42631	5.37974	7.2474	7.37922	10.0369	6.57577
IDP2	P41939	Isocitrate dehydrogenase [NADP] cytoplasmic OS=Saccharomyces cerevisiae (strain ATCC 204508 / S288c) GN=IDP2 PE=1 SV=2	1	1	3	3	10	6.9711	6887920	4265880	2038740	35109600	29104900	14648400	17253900	37061800	28911700	5.84508e+06	3.50384e+06	2.92498e+06	2.9794e+07	2.39057e+07	2.10161e+07	1.46416e+07	3.04413e+07	4.14796e+07	5.247e+06	3.97136e+06	2.87481e+06	2.58764e+07	2.40454e+07	3.24626e+07	1.90202e+07	2.68293e+07	2.68487e+07	1	1	1	4.93166	6.05471	11.2921	3.62497	6.75569	9.33932
EGD1	Q02642	Nascent polypeptide-associated complex subunit beta-1 OS=Saccharomyces cerevisiae (strain ATCC 204508 / S288c) GN=EGD1 PE=1 SV=2	1	1	3	3	4	6.54174	1059470	958678	922326	17041400	23470900	4125030	15792800	31394200	22760600	1.0265e+06	686453	1.32946e+06	1.65111e+07	1.68061e+07	5.9459e+06	1.53014e+07	2.24796e+07	3.28076e+07	921467	778046	1.30665e+06	1.43401e+07	1.69043e+07	9.18438e+06	1.98772e+07	1.98123e+07	2.12355e+07	1	1	1	15.5622	21.7267	7.02893	21.5713	25.4641	16.2519
CKA1	P15790	Casein kinase II subunit alpha OS=Saccharomyces cerevisiae (strain ATCC 204508 / S288c) GN=CKA1 PE=1 SV=1	1	1	3	3	8	6.59454	2144640	2235670	1743950	32351100	32640100	9431200	12685800	19552300	19157600	2.01881e+06	1.7915e+06	2.31197e+06	3.04531e+07	2.61554e+07	1.2503e+07	1.19415e+07	1.56678e+07	2.53974e+07	1.81224e+06	2.03054e+06	2.27231e+06	2.64488e+07	2.63082e+07	1.93129e+07	1.55126e+07	1.38087e+07	1.64391e+07	1	1	1	14.5945	12.9563	8.49923	8.55991	6.80052	7.23454
YTM1	Q12024	Ribosome biogenesis protein YTM1 OS=Saccharomyces cerevisiae (strain ATCC 204508 / S288c) GN=YTM1 PE=1 SV=1	1	1	3	3	2	6.12499	764378	831169	760484	10792900	10954000	3043600	4243680	5444190	6296980	720776	697985	960377	1.01772e+07	9.19876e+06	3.84361e+06	4.00161e+06	4.57183e+06	7.95214e+06	647024	791116	943903	8.83906e+06	9.25251e+06	5.93706e+06	5.19829e+06	4.02936e+06	5.14722e+06	1	1	1	13.6611	11.6955	6.28991	8.03416	5.09326	5.45313
KGD2	P19262	Dihydrolipoyllysine-residue succinyltransferase component of 2-oxoglutarate dehydrogenase complex, mitochondrial OS=Saccharomyces cerevisiae (strain ATCC 204508 / S288c) GN=KGD2 PE=1 SV=2	1	1	3	3	4	6.68602	2182610	1279870	1586790	15206500	12866500	9095990	7482710	13831700	12735800	2.09066e+06	1.26181e+06	1.68029e+06	1.45659e+07	1.2685e+07	9.63194e+06	7.16748e+06	1.36365e+07	1.34862e+07	1.87674e+06	1.43017e+06	1.65146e+06	1.26506e+07	1.27591e+07	1.48781e+07	9.31092e+06	1.20185e+07	8.7293e+06	1	1	1	6.74076	8.92135	9.00902	4.96122	8.40353	5.2858
SRL2	Q12020	Protein SRL2 OS=Saccharomyces cerevisiae (strain ATCC 204508 / S288c) GN=SRL2 PE=1 SV=1	1	1	3	3	2	5.49655	751976	551049	661088	3041690	2285970	1741340	1299400	2546360	2090090	740780	529219	698761	2.9964e+06	2.19541e+06	1.84057e+06	1.28005e+06	2.44549e+06	2.2092e+06	664981	599833	686775	2.60241e+06	2.20824e+06	2.84306e+06	1.66285e+06	2.15532e+06	1.42996e+06	1	1	1	3.91351	3.68143	4.13972	2.5006	3.5932	2.08214
DBP3	P20447	ATP-dependent RNA helicase DBP3 OS=Saccharomyces cerevisiae (strain ATCC 204508 / S288c) GN=DBP3 PE=1 SV=2	1	1	3	3	2	5.72842	472741	956939	667262	3004920	3567350	1651870	2530690	4210120	4326810	569025	725743	730953	3.61694e+06	2.70548e+06	1.80954e+06	3.04612e+06	3.19296e+06	4.73981e+06	510801	822578	718415	3.14135e+06	2.72129e+06	2.79513e+06	3.95706e+06	2.8141e+06	3.06796e+06	1	1	1	6.14986	3.30824	3.89069	7.74678	3.42107	4.27046
DBP5	P20449	ATP-dependent RNA helicase DBP5 OS=Saccharomyces cerevisiae (strain ATCC 204508 / S288c) GN=DBP5 PE=1 SV=2	1	1	3	3	5	6.23072	1084660	3294920	1037750	15006700	16865300	3104400	17661900	31314600	24928700	1.14985e+06	1.91662e+06	1.68289e+06	1.59086e+07	9.81035e+06	5.03431e+06	1.87234e+07	1.82153e+07	4.04261e+07	1.03219e+06	2.17235e+06	1.65402e+06	1.38168e+07	9.86768e+06	7.77629e+06	2.43226e+07	1.6054e+07	2.61668e+07	1	1	1	13.3859	4.5424	4.70145	23.564	7.39016	15.8201
GAR1	P28007	H/ACA ribonucleoprotein complex subunit 1 OS=Saccharomyces cerevisiae (strain ATCC 204508 / S288c) GN=GAR1 PE=1 SV=1	1	1	3	3	2	6.53988	1036690	889126	967720	5884120	5861410	2009910	5878030	6411190	6249930	912109	800904	1.22105e+06	5.17701e+06	5.27982e+06	2.53607e+06	5.17166e+06	5.77505e+06	7.88606e+06	818779	907768	1.20011e+06	4.4963e+06	5.31068e+06	3.91736e+06	6.71824e+06	5.08982e+06	5.10445e+06	1	1	1	5.49147	5.85025	3.26418	8.20519	5.60696	4.25333
P1707_RE|RTN1	P1707_RE|Q04947	|Reticulon-like protein 1 OS=Saccharomyces cerevisiae (strain ATCC 204508 / S288c) GN=RTN1 PE=1 SV=1	1	1	3	3	2	6.13224	2451500	2318510	1542550	7543100	6459800	4687820	4857390	8502980	6994520	2.39092e+06	2.01282e+06	1.82184e+06	7.3567e+06	5.60808e+06	5.5366e+06	4.73736e+06	7.38186e+06	8.26095e+06	2.14627e+06	2.28138e+06	1.79059e+06	6.38938e+06	5.64085e+06	8.55215e+06	6.15406e+06	6.50598e+06	5.34711e+06	1	1	1	2.97697	2.47256	4.77616	2.86732	2.85177	2.98622
PET123	P17558	37S ribosomal protein PET123, mitochondrial OS=Saccharomyces cerevisiae (strain ATCC 204508 / S288c) GN=PET123 PE=1 SV=1	1	1	3	3	2	6.65245	8427940	6253470	8041240	9485640	9159880	9442770	6087350	10143800	7475110	8.74382e+06	6.11556e+06	7.92553e+06	9.84116e+06	8.95787e+06	9.30689e+06	6.31551e+06	9.92009e+06	7.36755e+06	7.84913e+06	6.93155e+06	7.78958e+06	8.54717e+06	9.01021e+06	1.4376e+07	8.20416e+06	8.74303e+06	4.76883e+06	1	1	1	1.08893	1.29988	1.84554	1.04523	1.26134	0.612207
UME6	P39001	Transcriptional regulatory protein UME6 OS=Saccharomyces cerevisiae (strain ATCC 204508 / S288c) GN=UME6 PE=1 SV=2	1	1	3	3	2	6.10266	250252	322797	NA	1741730	1537980	375639	1825500	2830420	2621470	220461	235263	NA	1.53439e+06	1.12092e+06	585050	1.60818e+06	2.06288e+06	4.08288e+06	197903	266654	NA	1.33263e+06	1.12747e+06	903702	2.08911e+06	1.81811e+06	2.64275e+06	1	1	NA	6.73378	4.22822	NA	10.5563	6.81826	NA
PGK1	P00560	Phosphoglycerate kinase OS=Saccharomyces cerevisiae (strain ATCC 204508 / S288c) GN=PGK1 PE=1 SV=2	1	1	3	3	14	7.034	25975200	28907700	21680500	83712500	69915100	40755700	51071900	102451000	83252500	2.65918e+07	2.40443e+07	2.54614e+07	8.56995e+07	5.81526e+07	4.78632e+07	5.22842e+07	8.52147e+07	9.77712e+07	2.38708e+07	2.72525e+07	2.50247e+07	7.44311e+07	5.84924e+07	7.39323e+07	6.79197e+07	7.51036e+07	6.32849e+07	1	1	1	3.11808	2.14631	2.95438	2.84531	2.75584	2.5289
RPS19A|RPS19B	P07280|P07281	40S ribosomal protein S19-A OS=Saccharomyces cerevisiae (strain ATCC 204508 / S288c) GN=RPS19A PE=1 SV=2|40S ribosomal protein S19-B OS=Saccharomyces cerevisiae (strain ATCC 204508 / S288c) GN=RPS19B PE=1 SV=2	1	1	3	3	3	6.19741	5842300	2396450	721376	3925420	4525750	4191840	3739250	5861620	4976860	4.6577e+06	2.11097e+06	1.02721e+06	3.12949e+06	3.98661e+06	5.96902e+06	2.98107e+06	5.16335e+06	7.08686e+06	4.18111e+06	2.39264e+06	1.00959e+06	2.718e+06	4.00991e+06	9.2201e+06	3.87256e+06	4.5507e+06	4.58715e+06	1	1	1	0.650067	1.67594	9.1325	0.926204	1.90196	4.54357
SEC53	P07283	Phosphomannomutase OS=Saccharomyces cerevisiae (strain ATCC 204508 / S288c) GN=SEC53 PE=1 SV=1	1	1	3	3	3	5.96758	2234860	1951530	1454830	4917020	6100730	3842440	3104550	4647860	5104660	2.31192e+06	1.71821e+06	1.59731e+06	5.08655e+06	5.37135e+06	4.21875e+06	3.21159e+06	4.09218e+06	5.60458e+06	2.07535e+06	1.94747e+06	1.56991e+06	4.41773e+06	5.40274e+06	6.51652e+06	4.17202e+06	3.60663e+06	3.62771e+06	1	1	1	2.12867	2.77423	4.15089	2.01027	1.85195	2.31078
SES1	P07284	Serine--tRNA ligase, cytoplasmic OS=Saccharomyces cerevisiae (strain ATCC 204508 / S288c) GN=SES1 PE=1 SV=2	1	1	3	3	6	6.56839	3095470	3117420	2419150	16465000	13514300	12539100	16102700	44437000	31494500	3.45026e+06	2.6396e+06	2.56328e+06	1.83521e+07	1.14429e+07	1.32861e+07	1.79483e+07	3.76259e+07	3.33708e+07	3.09722e+06	2.9918e+06	2.51931e+06	1.5939e+07	1.15098e+07	2.05225e+07	2.33158e+07	3.31615e+07	2.16001e+07	1	1	1	5.14625	3.84711	8.14611	7.52797	11.0841	8.57384
RGI2	P40188	Respiratory growth induced protein 2 OS=Saccharomyces cerevisiae (strain ATCC 204508 / S288c) GN=RGI2 PE=1 SV=1	1	1	3	3	6	6.86607	3218840	5954710	3508690	89971000	74083900	31562100	55088300	12138500	89923200	2.70569e+06	7.20239e+06	3.45104e+06	7.56278e+07	8.96066e+07	3.10435e+07	4.63061e+07	1.46819e+07	8.84457e+07	2.42884e+06	8.1634e+06	3.39184e+06	6.56836e+07	9.01302e+07	4.79516e+07	6.01539e+07	1.29398e+07	5.72487e+07	1	1	1	27.0433	11.0408	14.1373	24.7666	1.5851	16.8784
RPS7B	P48164	40S ribosomal protein S7-B OS=Saccharomyces cerevisiae (strain ATCC 204508 / S288c) GN=RPS7B PE=1 SV=1	1	1	3	3	3	6.06608	5691000	2845540	3621090	20108100	17316400	14509700	16968600	19171900	17382300	4.83081e+06	3.07116e+06	3.95249e+06	1.70688e+07	1.86894e+07	1.58376e+07	1.44038e+07	2.0692e+07	1.89731e+07	4.33651e+06	3.48094e+06	3.88469e+06	1.48244e+07	1.87986e+07	2.44637e+07	1.87113e+07	1.82368e+07	1.22808e+07	1	1	1	3.41852	5.40044	6.29747	4.31483	5.23905	3.16134
PRE7	P23724	Proteasome subunit beta type-6 OS=Saccharomyces cerevisiae (strain ATCC 204508 / S288c) GN=PRE7 PE=1 SV=1	1	1	3	3	3	5.76271	1795480	1273230	1224650	6702990	5794260	3243200	4174880	5359050	6107470	1.61241e+06	1.23852e+06	1.40192e+06	6.01954e+06	5.63629e+06	3.71265e+06	3.7492e+06	5.21294e+06	6.99152e+06	1.44742e+06	1.40377e+06	1.37787e+06	5.22804e+06	5.66922e+06	5.73477e+06	4.8704e+06	4.5944e+06	4.52544e+06	1	1	1	3.61197	4.03856	4.16206	3.36488	3.2729	3.28438
RFC1	P38630	Replication factor C subunit 1 OS=Saccharomyces cerevisiae (strain ATCC 204508 / S288c) GN=RFC1 PE=1 SV=1	1	1	3	3	3	5.8468	686932	1654680	821904	4675490	4462180	1710070	3537660	6828010	5358490	774411	1.1352e+06	1.06269e+06	5.2709e+06	3.0613e+06	2.21105e+06	3.98817e+06	4.68438e+06	6.9283e+06	695171	1.28667e+06	1.04446e+06	4.57784e+06	3.07918e+06	3.41531e+06	5.18083e+06	4.12856e+06	4.48452e+06	1	1	1	6.5852	2.39314	3.26994	7.45261	3.20872	4.29363
FKS1	P38631	1,3-beta-glucan synthase component FKS1 OS=Saccharomyces cerevisiae (strain ATCC 204508 / S288c) GN=FKS1 PE=1 SV=2	1	1	3	3	2	5.52742	4244180	2086840	1015880	1068190	1091650	881430	929767	1365680	1189900	3.52188e+06	1.91617e+06	1.33326e+06	886400	1.00237e+06	1.15681e+06	771534	1.25399e+06	1.56165e+06	3.16151e+06	2.17185e+06	1.31039e+06	769849	1.00823e+06	1.78687e+06	1.00226e+06	1.1052e+06	1.01082e+06	1	1	1	0.243506	0.464227	1.36362	0.31702	0.508876	0.771386
SKO1	Q02100	CRE-binding bZIP protein SKO1 OS=Saccharomyces cerevisiae (strain ATCC 204508 / S288c) GN=SKO1 PE=1 SV=1	1	1	3	3	6	6.56523	955163	981002	789022	18258000	14944300	1826260	23960400	31206900	27210200	741771	739160	1.34843e+06	1.4179e+07	1.12601e+07	3.12106e+06	1.86074e+07	2.35136e+07	4.65019e+07	665871	837785	1.3253e+06	1.23146e+07	1.13259e+07	4.82097e+06	2.4172e+07	2.07236e+07	3.00996e+07	1	1	1	18.494	13.5189	3.63765	36.3013	24.7362	22.7115
SMC2	P38989	Structural maintenance of chromosomes protein 2 OS=Saccharomyces cerevisiae (strain ATCC 204508 / S288c) GN=SMC2 PE=1 SV=1	1	1	3	3	7	6.01037	2043070	3508620	1952660	17590800	16582200	5920930	15698100	19632400	21195700	2.0141e+06	2.73415e+06	2.5418e+06	1.73414e+07	1.2922e+07	7.70736e+06	1.54755e+07	1.52989e+07	2.75907e+07	1.80801e+06	3.09897e+06	2.4982e+06	1.50612e+07	1.29975e+07	1.19052e+07	2.01035e+07	1.34836e+07	1.78588e+07	1	1	1	8.33025	4.19413	4.76552	11.1191	4.351	7.14866
RSC2	Q06488	Chromatin structure-remodeling complex subunit RSC2 OS=Saccharomyces cerevisiae (strain ATCC 204508 / S288c) GN=RSC2 PE=1 SV=1	1	1	3	3	2	6.04496	670316	443352	195762	4431090	3661360	1003040	2652290	4614450	3963560	515405	346671	325605	3.40706e+06	2.86293e+06	1.66832e+06	2.03934e+06	3.60819e+06	6.59246e+06	462667	392927	320019	2.95907e+06	2.87966e+06	2.57699e+06	2.64921e+06	3.18006e+06	4.26714e+06	1	1	1	6.39568	7.32875	8.05261	5.72595	8.09326	13.334
ATG8	P38182	Autophagy-related protein 8 OS=Saccharomyces cerevisiae (strain ATCC 204508 / S288c) GN=ATG8 PE=1 SV=1	1	1	3	3	2	5.65636	3165970	2957120	1415740	6540710	6766410	5506240	3353090	7584600	4896580	3.23122e+06	2.3256e+06	1.76384e+06	6.67551e+06	5.32137e+06	6.86009e+06	3.4222e+06	5.96483e+06	6.10053e+06	2.90059e+06	2.6359e+06	1.73358e+06	5.79776e+06	5.35247e+06	1.05965e+07	4.4456e+06	5.25708e+06	3.94872e+06	1	1	1	1.99882	2.0306	6.11249	1.53265	1.99442	2.27779
RQC2	Q12532	Ribosome quality control complex subunit 2 OS=Saccharomyces cerevisiae (strain ATCC 204508 / S288c) GN=RQC2 PE=1 SV=1	1	1	3	3	3	5.53232	797360	865692	220917	4132850	5552290	3032040	1963000	3450900	3251630	784447	622240	312410	4.06592e+06	3.99086e+06	4.28776e+06	1.93121e+06	2.48043e+06	4.5983e+06	704180	705266	307051	3.5313e+06	4.01418e+06	6.62313e+06	2.50874e+06	2.18612e+06	2.97636e+06	1	1	1	5.01477	5.69173	21.5701	3.56264	3.09971	9.69339
GPM1	P00950	Phosphoglycerate mutase 1 OS=Saccharomyces cerevisiae (strain ATCC 204508 / S288c) GN=GPM1 PE=1 SV=3	1	1	3	3	6	6.93328	19895400	12698000	9152310	40007900	62097300	64265100	24781500	32433400	25137100	1.98322e+07	1.16081e+07	1.00435e+07	3.98809e+07	5.67675e+07	7.05227e+07	2.47028e+07	2.96497e+07	2.75847e+07	1.78029e+07	1.3157e+07	9.8712e+06	3.4637e+07	5.70993e+07	1.08933e+08	3.20902e+07	2.61316e+07	1.78549e+07	1	1	1	1.94558	4.33984	11.0355	1.80252	1.98614	1.80879
DPM1	P14020	Dolichol-phosphate mannosyltransferase OS=Saccharomyces cerevisiae (strain ATCC 204508 / S288c) GN=DPM1 PE=1 SV=3	1	1	3	3	2	6.37342	1132310	1242250	713268	9394690	8812510	3899550	7392310	11695300	10047100	1.06552e+06	993669	947595	8.84055e+06	7.04908e+06	5.18066e+06	6.95628e+06	9.35501e+06	1.33478e+07	956494	1.12625e+06	931340	7.67812e+06	7.09027e+06	8.00234e+06	9.03656e+06	8.245e+06	8.63973e+06	1	1	1	8.02736	6.29545	8.59228	9.44758	7.32073	9.27666
SSE1	P32589	Heat shock protein homolog SSE1 OS=Saccharomyces cerevisiae (strain ATCC 204508 / S288c) GN=SSE1 PE=1 SV=4	1	1	3	3	8	6.51848	7865780	5784640	4943030	43021000	32863500	22530700	26808500	39466400	45438700	7.2179e+06	5.65507e+06	5.51014e+06	3.94775e+07	3.21274e+07	2.51156e+07	2.46004e+07	3.85824e+07	5.06519e+07	6.47934e+06	6.40962e+06	5.41562e+06	3.42867e+07	3.23151e+07	3.87951e+07	3.19571e+07	3.40044e+07	3.27857e+07	1	1	1	5.29169	5.04166	7.16355	4.93215	5.30522	6.05391
SRP40	P32583	Suppressor protein SRP40 OS=Saccharomyces cerevisiae (strain ATCC 204508 / S288c) GN=SRP40 PE=1 SV=2	1	1	3	3	5	6.9346	1692690	2137540	1055770	34269900	23335500	3669880	12136400	17735400	17946900	1.34243e+06	1.57096e+06	1.81137e+06	2.71786e+07	1.71501e+07	6.29635e+06	9.62506e+06	1.30344e+07	3.07912e+07	1.20507e+06	1.78057e+06	1.78029e+06	2.36049e+07	1.72503e+07	9.7257e+06	1.25034e+07	1.14878e+07	1.99304e+07	1	1	1	19.588	9.6881	5.46298	10.3757	6.45177	11.195
CYC1	P00044	Cytochrome c iso-1 OS=Saccharomyces cerevisiae (strain ATCC 204508 / S288c) GN=CYC1 PE=1 SV=2	1	1	3	3	2	5.67476	2223520	1842060	1066350	3402680	4347900	2879470	1732420	3672350	3587950	2.38593e+06	1.50979e+06	1.21247e+06	3.65122e+06	3.56363e+06	3.27403e+06	1.85896e+06	3.00994e+06	4.07958e+06	2.1418e+06	1.71124e+06	1.19167e+06	3.17113e+06	3.58446e+06	5.05725e+06	2.41488e+06	2.6528e+06	2.64061e+06	1	1	1	1.48059	2.09465	4.24385	1.1275	1.55022	2.2159
ABF2	Q02486	ARS-binding factor 2, mitochondrial OS=Saccharomyces cerevisiae (strain ATCC 204508 / S288c) GN=ABF2 PE=1 SV=1	1	1	3	3	8	7.47865	7514880	8515050	5662040	48258300	36693500	13657900	51232000	85901400	69078000	6.81589e+06	6.83188e+06	7.78071e+06	4.37696e+07	2.94403e+07	1.87685e+07	4.64667e+07	6.89213e+07	9.49262e+07	6.11846e+06	7.74346e+06	7.64724e+06	3.80144e+07	2.96123e+07	2.8991e+07	6.03625e+07	6.07435e+07	6.14434e+07	1	1	1	6.21306	3.82418	3.79104	9.86564	7.8445	8.03472
IST2	P38250	Increased sodium tolerance protein 2 OS=Saccharomyces cerevisiae (strain ATCC 204508 / S288c) GN=IST2 PE=1 SV=2	1	1	3	3	3	6.08686	1078090	1228890	1008890	7107070	6951010	3218410	4651710	8866610	6575980	1.1074e+06	981844	1.22932e+06	7.30029e+06	5.55364e+06	3.92159e+06	4.77818e+06	7.08414e+06	8.01274e+06	994088	1.11285e+06	1.20823e+06	6.34039e+06	5.58609e+06	6.05751e+06	6.20709e+06	6.24358e+06	5.18645e+06	1	1	1	6.3781	5.01962	5.01354	6.24401	5.61044	4.2926
PRE3	P38624	Proteasome subunit beta type-1 OS=Saccharomyces cerevisiae (strain ATCC 204508 / S288c) GN=PRE3 PE=1 SV=2	1	1	3	3	3	5.99403	1358040	1323460	1041570	4896220	4258570	2515370	2694010	5516010	4862350	1.39017e+06	1.12734e+06	1.19451e+06	5.01205e+06	3.62752e+06	2.88471e+06	2.75774e+06	4.69862e+06	5.5763e+06	1.24792e+06	1.27776e+06	1.17402e+06	4.35303e+06	3.64871e+06	4.45589e+06	3.58245e+06	4.14111e+06	3.6094e+06	1	1	1	3.48822	2.85554	3.79542	2.87073	3.2409	3.07441
CBR1	P38626	NADH-cytochrome b5 reductase 1 OS=Saccharomyces cerevisiae (strain ATCC 204508 / S288c) GN=CBR1 PE=1 SV=2	1	1	3	3	2	6.29869	1022720	3135060	1402080	4258990	4006990	2456580	3315050	10956200	7100330	1.39309e+06	2.01409e+06	1.60221e+06	5.80135e+06	2.57425e+06	2.80722e+06	4.51557e+06	7.03869e+06	8.1138e+06	1.25054e+06	2.28282e+06	1.57472e+06	5.03854e+06	2.58929e+06	4.3362e+06	5.86595e+06	6.20352e+06	5.25187e+06	1	1	1	4.02908	1.13425	2.75363	4.69072	2.71748	3.3351
LYS1	P38998	Saccharopine dehydrogenase [NAD(+), L-lysine-forming] OS=Saccharomyces cerevisiae (strain ATCC 204508 / S288c) GN=LYS1 PE=1 SV=3	1	1	3	3	3	6.37433	1610720	2152850	1556010	3990070	6410450	3439160	6114090	7631520	8407170	1.82443e+06	1.75547e+06	1.68471e+06	4.51947e+06	5.22719e+06	3.72362e+06	6.9253e+06	6.22288e+06	9.10254e+06	1.63775e+06	1.9897e+06	1.65581e+06	3.92521e+06	5.25774e+06	5.75172e+06	8.99632e+06	5.48451e+06	5.89185e+06	1	1	1	2.39671	2.64247	3.47366	5.4931	2.75644	3.55829
GSP2	P32836	GTP-binding nuclear protein GSP2/CNR2 OS=Saccharomyces cerevisiae (strain ATCC 204508 / S288c) GN=GSP2 PE=1 SV=1	1	1	3	3	2	6.40286	1496860	759192	215897	17455300	16254800	5958310	15150400	33331000	23463700	1.12937e+06	565530	384140	1.31699e+07	1.21084e+07	1.06015e+07	1.14308e+07	2.48286e+07	4.17483e+07	1.01381e+06	640988	377550	1.14382e+07	1.21791e+07	1.63756e+07	1.48492e+07	2.18826e+07	2.70227e+07	1	1	1	11.2824	19.0005	43.3734	14.647	34.1388	71.5737
