# Supplementary material for: Novel mechanistic insights into the role of Mer2 as the keystone of meiotic DNA break formation
Source: eLife journal article supplement (doi:10.7554/elife.72330), 2021-12-24
Supplement: data2 [file Limma_results_V1.xlsx]

## Sheet: Limma_results_V1
gene_name	protein_id	description	found.in.files	found.in.file_fractionated_merged_results_20210825_1637_proteins.txt	found.in.conditions	found.in.reps	max.qupm	average.top3	logFC	AveExpr	t	pvalue.limma	fdr.limma	B	pvalue.fdrtool	qval.fdrtool	lfdr.fdrtool	comparison	hit_annotation_method	pvalue	fdr	hit	hit_annotation	top3
YRA1	Q12159	RNA annealing protein YRA1 OS=Saccharomyces cerevisiae (strain ATCC 204508 / S288c) GN=YRA1 PE=1 SV=2	1	1	3	3	9	7.93302	4.34703	24.6482	22.0485	2.36382e-08	6.42882e-06	9.93979	2.22045e-16	6.00575e-17	6.00575e-17	WT - Control	limma	2.36382e-08	6.42882e-06	TRUE	enriched hit	7.93302
RPS2	P25443	40S ribosomal protein S2 OS=Saccharomyces cerevisiae (strain ATCC 204508 / S288c) GN=RPS2 PE=1 SV=3	1	1	3	3	5	7.47419	4.50001	23.9229	20.7015	3.85124e-08	6.42882e-06	9.5109	2.22045e-16	6.00575e-17	6.00575e-17	WT - Control	limma	3.85124e-08	6.42882e-06	TRUE	enriched hit	7.47419
REC107	P21651	Recombination protein 107 OS=Saccharomyces cerevisiae (strain ATCC 204508 / S288c) GN=REC107 PE=1 SV=2	1	1	3	3	15	9.55705	4.03571	27.6004	19.705	5.63912e-08	6.42882e-06	9.16804	2.22045e-16	6.00575e-17	6.00575e-17	WT - Control	limma	5.63912e-08	6.42882e-06	TRUE	enriched hit	9.55705
RPC82	P32349	DNA-directed RNA polymerase III subunit RPC3 OS=Saccharomyces cerevisiae (strain ATCC 204508 / S288c) GN=RPC82 PE=1 SV=2	1	1	3	3	2	5.62875	3.76613	20.1692	18.8428	3.64441e-07	6.7466e-06	7.42044	2.22045e-16	6.00575e-17	6.00575e-17	WT - Control	limma	3.64441e-07	6.7466e-06	TRUE	enriched hit	5.62875
RPL11A|RPL11B	P0C0W9|Q3E757	60S ribosomal protein L11-A OS=Saccharomyces cerevisiae (strain ATCC 204508 / S288c) GN=RPL11A PE=1 SV=2|60S ribosomal protein L11-B OS=Saccharomyces cerevisiae (strain ATCC 204508 / S288c) GN=RPL11B PE=1 SV=3	1	1	3	3	5	7.36735	4.56703	23.2325	18.6428	8.64737e-08	6.42882e-06	8.77605	2.22045e-16	6.00575e-17	6.00575e-17	WT - Control	limma	8.64737e-08	6.42882e-06	TRUE	enriched hit	7.36735
BFR1	P38934	Nuclear segregation protein BFR1 OS=Saccharomyces cerevisiae (strain ATCC 204508 / S288c) GN=BFR1 PE=1 SV=1	1	1	3	3	22	7.13669	3.64475	25.4587	18.5829	8.86428e-08	6.42882e-06	8.75311	2.22045e-16	6.00575e-17	6.00575e-17	WT - Control	limma	8.86428e-08	6.42882e-06	TRUE	enriched hit	7.13669
FRS1	P15624	Phenylalanine--tRNA ligase beta subunit OS=Saccharomyces cerevisiae (strain ATCC 204508 / S288c) GN=FRS1 PE=1 SV=3	1	1	3	3	4	5.91774	3.22884	21.9522	18.4343	9.42986e-08	6.42882e-06	8.6957	2.22045e-16	6.00575e-17	6.00575e-17	WT - Control	limma	9.42986e-08	6.42882e-06	TRUE	enriched hit	5.91774
HIS3	P06633	Imidazoleglycerol-phosphate dehydratase OS=Saccharomyces cerevisiae (strain ATCC 204508 / S288c) GN=HIS3 PE=1 SV=2	1	1	3	3	2	8.20604	5.84295	22.9219	18.2377	1.02416e-07	6.42882e-06	8.61882	2.22045e-16	6.00575e-17	6.00575e-17	WT - Control	limma	1.02416e-07	6.42882e-06	TRUE	enriched hit	8.20604
SRP1	Q02821	Importin subunit alpha OS=Saccharomyces cerevisiae (strain ATCC 204508 / S288c) GN=SRP1 PE=1 SV=1	1	1	3	3	8	7.13645	3.47186	23.4484	18.0691	1.10008e-07	6.42882e-06	8.55203	2.22045e-16	6.00575e-17	6.00575e-17	WT - Control	limma	1.10008e-07	6.42882e-06	TRUE	enriched hit	7.13645
TEF4	P36008	Elongation factor 1-gamma 2 OS=Saccharomyces cerevisiae (strain ATCC 204508 / S288c) GN=TEF4 PE=1 SV=1	1	1	3	3	5	6.8212	3.28584	24.2676	17.9005	1.18239e-07	6.42882e-06	8.48442	2.22045e-16	6.00575e-17	6.00575e-17	WT - Control	limma	1.18239e-07	6.42882e-06	TRUE	enriched hit	6.8212
MRPL9	P31334	54S ribosomal protein L9, mitochondrial OS=Saccharomyces cerevisiae (strain ATCC 204508 / S288c) GN=MRPL9 PE=1 SV=3	1	1	3	3	3	6.09676	3.33395	21.3876	17.7666	1.25271e-07	6.42882e-06	8.43015	2.22045e-16	6.00575e-17	6.00575e-17	WT - Control	limma	1.25271e-07	6.42882e-06	TRUE	enriched hit	6.09676
CDC60	P26637	Leucine--tRNA ligase, cytoplasmic OS=Saccharomyces cerevisiae (strain ATCC 204508 / S288c) GN=CDC60 PE=1 SV=1	1	1	3	3	6	6.15807	3.60998	22.6908	17.7293	1.2731e-07	6.42882e-06	8.41496	2.22045e-16	6.00575e-17	6.00575e-17	WT - Control	limma	1.2731e-07	6.42882e-06	TRUE	enriched hit	6.15807
CTA1	P15202	Peroxisomal catalase A OS=Saccharomyces cerevisiae (strain ATCC 204508 / S288c) GN=CTA1 PE=1 SV=1	1	1	3	3	4	6.61409	3.45774	22.8203	17.6133	1.33901e-07	6.42882e-06	8.36741	2.22045e-16	6.00575e-17	6.00575e-17	WT - Control	limma	1.33901e-07	6.42882e-06	TRUE	enriched hit	6.61409
HHT1	P61830	Histone H3 OS=Saccharomyces cerevisiae (strain ATCC 204508 / S288c) GN=HHT1 PE=1 SV=2	1	1	3	3	5	7.57343	4.12496	26.1141	17.4517	1.43733e-07	6.42882e-06	8.30049	2.22045e-16	6.00575e-17	6.00575e-17	WT - Control	limma	1.43733e-07	6.42882e-06	TRUE	enriched hit	7.57343
RPS1A	P33442	40S ribosomal protein S1-A OS=Saccharomyces cerevisiae (strain ATCC 204508 / S288c) GN=RPS1A PE=1 SV=2	1	1	3	3	2	7.07683	4.71394	22.0411	17.4191	1.45816e-07	6.42882e-06	8.28688	2.22045e-16	6.00575e-17	6.00575e-17	WT - Control	limma	1.45816e-07	6.42882e-06	TRUE	enriched hit	7.07683
HTS1	P07263|P07263-2	Histidine--tRNA ligase, mitochondrial OS=Saccharomyces cerevisiae (strain ATCC 204508 / S288c) GN=HTS1 PE=1 SV=2|Isoform Cytoplasmic of Histidine--tRNA ligase, mitochondrial OS=Saccharomyces cerevisiae (strain ATCC 204508 / S288c) GN=HTS1	1	1	3	3	6	6.56405	3.46923	23.2801	17.2421	1.57716e-07	6.42882e-06	8.21252	2.22045e-16	6.00575e-17	6.00575e-17	WT - Control	limma	1.57716e-07	6.42882e-06	TRUE	enriched hit	6.56405
SPP1	Q03012	COMPASS component SPP1 OS=Saccharomyces cerevisiae (strain ATCC 204508 / S288c) GN=SPP1 PE=1 SV=1	1	1	3	3	10	8.33915	4.30595	26.2962	17.1413	1.64981e-07	6.42882e-06	8.16974	2.22045e-16	6.00575e-17	6.00575e-17	WT - Control	limma	1.64981e-07	6.42882e-06	TRUE	enriched hit	8.33915
ZUO1	P32527	Zuotin OS=Saccharomyces cerevisiae (strain ATCC 204508 / S288c) GN=ZUO1 PE=1 SV=1	1	1	3	3	6	6.72192	3.16458	22.8834	17.1365	1.65332e-07	6.42882e-06	8.16772	2.22045e-16	6.00575e-17	6.00575e-17	WT - Control	limma	1.65332e-07	6.42882e-06	TRUE	enriched hit	6.72192
SMC1	P32908	Structural maintenance of chromosomes protein 1 OS=Saccharomyces cerevisiae (strain ATCC 204508 / S288c) GN=SMC1 PE=1 SV=1	1	1	3	3	27	7.15628	3.05153	26.1664	16.9212	1.82183e-07	6.42882e-06	8.07525	2.22045e-16	6.00575e-17	6.00575e-17	WT - Control	limma	1.82183e-07	6.42882e-06	TRUE	enriched hit	7.15628
DED81	P38707	Asparagine--tRNA ligase, cytoplasmic OS=Saccharomyces cerevisiae (strain ATCC 204508 / S288c) GN=DED81 PE=1 SV=1	1	1	3	3	7	6.39461	3.00168	22.516	16.7973	1.92751e-07	6.42882e-06	8.02138	2.22045e-16	6.00575e-17	6.00575e-17	WT - Control	limma	1.92751e-07	6.42882e-06	TRUE	enriched hit	6.39461
YHM2	Q04013	Citrate/oxoglutarate carrier protein OS=Saccharomyces cerevisiae (strain ATCC 204508 / S288c) GN=YHM2 PE=1 SV=1	1	1	3	3	2	6.48924	2.9596	21.5609	16.6761	2.03767e-07	6.42882e-06	7.96817	2.22045e-16	6.00575e-17	6.00575e-17	WT - Control	limma	2.03767e-07	6.42882e-06	TRUE	enriched hit	6.48924
SUP35	P05453	Eukaryotic peptide chain release factor GTP-binding subunit OS=Saccharomyces cerevisiae (strain ATCC 204508 / S288c) GN=SUP35 PE=1 SV=1	1	1	3	3	5	6.44108	3.63086	23.001	16.6041	2.10643e-07	6.42882e-06	7.93634	2.22045e-16	6.00575e-17	6.00575e-17	WT - Control	limma	2.10643e-07	6.42882e-06	TRUE	enriched hit	6.44108
MRPS17	Q03246	37S ribosomal protein S17, mitochondrial OS=Saccharomyces cerevisiae (strain ATCC 204508 / S288c) GN=MRPS17 PE=1 SV=1	1	1	3	3	3	6.04828	2.97274	21.8947	16.5478	2.16199e-07	6.42882e-06	7.91135	2.22045e-16	6.00575e-17	6.00575e-17	WT - Control	limma	2.16199e-07	6.42882e-06	TRUE	enriched hit	6.04828
MRT4	P33201	Ribosome assembly factor MRT4 OS=Saccharomyces cerevisiae (strain ATCC 204508 / S288c) GN=MRT4 PE=1 SV=1	1	1	3	3	3	6.12173	2.97075	22.0894	16.5158	2.19432e-07	6.42882e-06	7.89708	2.22045e-16	6.00575e-17	6.00575e-17	WT - Control	limma	2.19432e-07	6.42882e-06	TRUE	enriched hit	6.12173
SSZ1	P38788	Ribosome-associated complex subunit SSZ1 OS=Saccharomyces cerevisiae (strain ATCC 204508 / S288c) GN=SSZ1 PE=1 SV=2	1	1	3	3	5	6.25138	2.95713	22.6835	16.4548	2.25744e-07	6.42882e-06	7.86982	2.22045e-16	6.00575e-17	6.00575e-17	WT - Control	limma	2.25744e-07	6.42882e-06	TRUE	enriched hit	6.25138
DPM1	P14020	Dolichol-phosphate mannosyltransferase OS=Saccharomyces cerevisiae (strain ATCC 204508 / S288c) GN=DPM1 PE=1 SV=3	1	1	3	3	2	6.37342	3.10851	21.9429	16.3935	2.32293e-07	6.42882e-06	7.84229	2.22045e-16	6.00575e-17	6.00575e-17	WT - Control	limma	2.32293e-07	6.42882e-06	TRUE	enriched hit	6.37342
MGM101	P32787	Mitochondrial genome maintenance protein MGM101 OS=Saccharomyces cerevisiae (strain ATCC 204508 / S288c) GN=MGM101 PE=1 SV=1	1	1	3	3	4	6.87243	3.63763	22.9541	16.312	2.41329e-07	6.42882e-06	7.80552	2.22045e-16	6.00575e-17	6.00575e-17	WT - Control	limma	2.41329e-07	6.42882e-06	TRUE	enriched hit	6.87243
RIM4	P38741	Meiotic activator RIM4 OS=Saccharomyces cerevisiae (strain ATCC 204508 / S288c) GN=RIM4 PE=1 SV=1	1	1	3	3	9	7.0502	3.15443	23.2545	16.2913	2.4369e-07	6.42882e-06	7.79613	2.22045e-16	6.00575e-17	6.00575e-17	WT - Control	limma	2.4369e-07	6.42882e-06	TRUE	enriched hit	7.0502
RED1	P14291	Protein RED1 OS=Saccharomyces cerevisiae (strain ATCC 204508 / S288c) GN=RED1 PE=1 SV=1	1	1	3	3	10	7.3981	3.70699	24.1203	16.2741	2.45672e-07	6.42882e-06	7.78832	2.22045e-16	6.00575e-17	6.00575e-17	WT - Control	limma	2.45672e-07	6.42882e-06	TRUE	enriched hit	7.3981
SUI3	P09064	Eukaryotic translation initiation factor 2 subunit beta OS=Saccharomyces cerevisiae (strain ATCC 204508 / S288c) GN=SUI3 PE=1 SV=2	1	1	3	3	3	5.93457	4.7567	21.2531	16.2613	2.47152e-07	6.42882e-06	7.78252	2.22045e-16	6.00575e-17	6.00575e-17	WT - Control	limma	2.47152e-07	6.42882e-06	TRUE	enriched hit	5.93457
NAT1	P12945	N-terminal acetyltransferase A complex subunit NAT1 OS=Saccharomyces cerevisiae (strain ATCC 204508 / S288c) GN=NAT1 PE=1 SV=2	1	1	3	3	10	6.3812	2.93062	23.5684	16.1392	2.61831e-07	6.42882e-06	7.72678	2.22045e-16	6.00575e-17	6.00575e-17	WT - Control	limma	2.61831e-07	6.42882e-06	TRUE	enriched hit	6.3812
TFC6	Q06339	Transcription factor tau 91 kDa subunit OS=Saccharomyces cerevisiae (strain ATCC 204508 / S288c) GN=TFC6 PE=1 SV=1	1	1	3	3	3	6.17854	4.29295	21.8451	16.0913	2.67866e-07	6.42882e-06	7.70474	2.22045e-16	6.00575e-17	6.00575e-17	WT - Control	limma	2.67866e-07	6.42882e-06	TRUE	enriched hit	6.17854
ARP4	P80428	Actin-related protein 4 OS=Saccharomyces cerevisiae (strain ATCC 204508 / S288c) GN=ARP4 PE=1 SV=1	1	1	3	3	4	6.10595	3.16768	22.1126	16.0665	2.71044e-07	6.42882e-06	7.69333	2.22045e-16	6.00575e-17	6.00575e-17	WT - Control	limma	2.71044e-07	6.42882e-06	TRUE	enriched hit	6.10595
NAM9	P27929	37S ribosomal protein NAM9, mitochondrial OS=Saccharomyces cerevisiae (strain ATCC 204508 / S288c) GN=NAM9 PE=1 SV=2	1	1	3	3	2	5.82461	3.83144	20.3315	15.9602	2.8517e-07	6.4449e-06	7.6441	2.22045e-16	6.00575e-17	6.00575e-17	WT - Control	limma	2.8517e-07	6.4449e-06	TRUE	enriched hit	5.82461
RPS18A|RPS18B	P0CX55|P0CX56	40S ribosomal protein S18-A OS=Saccharomyces cerevisiae (strain ATCC 204508 / S288c) GN=RPS18A PE=1 SV=1|40S ribosomal protein S18-B OS=Saccharomyces cerevisiae (strain ATCC 204508 / S288c) GN=RPS18B PE=1 SV=1	1	1	3	3	4	7.17463	3.53115	24.0191	15.9027	2.93148e-07	6.4449e-06	7.61732	2.22045e-16	6.00575e-17	6.00575e-17	WT - Control	limma	2.93148e-07	6.4449e-06	TRUE	enriched hit	7.17463
POB3	Q04636	FACT complex subunit POB3 OS=Saccharomyces cerevisiae (strain ATCC 204508 / S288c) GN=POB3 PE=1 SV=1	1	1	3	3	7	6.93127	4.16344	23.6624	15.8383	3.02397e-07	6.4449e-06	7.58715	2.22045e-16	6.00575e-17	6.00575e-17	WT - Control	limma	3.02397e-07	6.4449e-06	TRUE	enriched hit	6.93127
PRT1	P06103	Eukaryotic translation initiation factor 3 subunit B OS=Saccharomyces cerevisiae (strain ATCC 204508 / S288c) GN=PRT1 PE=1 SV=1	1	1	3	3	5	6.32802	2.98274	23.1656	15.8159	3.05687e-07	6.4449e-06	7.57663	2.22045e-16	6.00575e-17	6.00575e-17	WT - Control	limma	3.05687e-07	6.4449e-06	TRUE	enriched hit	6.32802
NUS1	Q12063	Dehydrodolichyl diphosphate synthase complex subunit NUS1 OS=Saccharomyces cerevisiae (strain ATCC 204508 / S288c) GN=NUS1 PE=1 SV=1	1	1	3	3	3	5.81798	2.84746	21.1862	15.6717	3.27858e-07	6.72552e-06	7.50849	2.22045e-16	6.00575e-17	6.00575e-17	WT - Control	limma	3.27858e-07	6.72552e-06	TRUE	enriched hit	5.81798
PSH1	Q12161	RING finger protein PSH1 OS=Saccharomyces cerevisiae (strain ATCC 204508 / S288c) GN=PSH1 PE=1 SV=1	1	1	3	3	3	5.95004	3.09135	21.6663	15.5564	3.46897e-07	6.7466e-06	7.45344	2.22045e-16	6.00575e-17	6.00575e-17	WT - Control	limma	3.46897e-07	6.7466e-06	TRUE	enriched hit	5.95004
REC8	Q12188	Meiotic recombination protein REC8 OS=Saccharomyces cerevisiae (strain ATCC 204508 / S288c) GN=REC8 PE=1 SV=1	1	1	3	3	8	6.52365	3.05626	23.2496	15.4838	3.5951e-07	6.7466e-06	7.41856	2.22045e-16	6.00575e-17	6.00575e-17	WT - Control	limma	3.5951e-07	6.7466e-06	TRUE	enriched hit	6.52365
TRI1	Q05024	Protein TRI1 OS=Saccharomyces cerevisiae (strain ATCC 204508 / S288c) GN=TRI1 PE=1 SV=1	1	1	3	3	3	6.34533	4.33369	22.0897	15.4587	3.63999e-07	6.7466e-06	7.40643	2.22045e-16	6.00575e-17	6.00575e-17	WT - Control	limma	3.63999e-07	6.7466e-06	TRUE	enriched hit	6.34533
MRPS5	P33759	37S ribosomal protein S5, mitochondrial OS=Saccharomyces cerevisiae (strain ATCC 204508 / S288c) GN=MRPS5 PE=1 SV=1	1	1	3	3	2	6.26726	3.33853	20.4268	15.3759	3.79248e-07	6.76312e-06	7.36628	2.22045e-16	6.00575e-17	6.00575e-17	WT - Control	limma	3.79248e-07	6.76312e-06	TRUE	enriched hit	6.26726
RPS7A	P26786	40S ribosomal protein S7-A OS=Saccharomyces cerevisiae (strain ATCC 204508 / S288c) GN=RPS7A PE=1 SV=4	1	1	3	3	3	6.15425	4.07016	23.5431	15.3092	3.92042e-07	6.76312e-06	7.33378	2.22045e-16	6.00575e-17	6.00575e-17	WT - Control	limma	3.92042e-07	6.76312e-06	TRUE	enriched hit	6.15425
LPD1	P09624	Dihydrolipoyl dehydrogenase, mitochondrial OS=Saccharomyces cerevisiae (strain ATCC 204508 / S288c) GN=LPD1 PE=1 SV=1	1	1	3	3	9	6.77582	2.85718	23.8931	15.3091	3.92065e-07	6.76312e-06	7.33372	2.22045e-16	6.00575e-17	6.00575e-17	WT - Control	limma	3.92065e-07	6.76312e-06	TRUE	enriched hit	6.77582
YEF3	P16521	Elongation factor 3A OS=Saccharomyces cerevisiae (strain ATCC 204508 / S288c) GN=YEF3 PE=1 SV=4	1	1	3	3	5	6.67971	2.87338	22.5735	15.2492	4.03965e-07	6.81354e-06	7.30441	2.22045e-16	6.00575e-17	6.00575e-17	WT - Control	limma	4.03965e-07	6.81354e-06	TRUE	enriched hit	6.67971
SSB1|SSB2	P11484|P40150	Heat shock protein SSB1 OS=Saccharomyces cerevisiae (strain ATCC 204508 / S288c) GN=SSB1 PE=1 SV=3|Heat shock protein SSB2 OS=Saccharomyces cerevisiae (strain ATCC 204508 / S288c) GN=SSB2 PE=1 SV=2	1	1	3	3	13	7.6812	2.95733	24.7825	15.1703	4.20277e-07	6.93456e-06	7.26556	2.22045e-16	6.00575e-17	6.00575e-17	WT - Control	limma	4.20277e-07	6.93456e-06	TRUE	enriched hit	7.6812
SMC3	P47037	Structural maintenance of chromosomes protein 3 OS=Saccharomyces cerevisiae (strain ATCC 204508 / S288c) GN=SMC3 PE=1 SV=1	1	1	3	3	30	7.29899	3.37127	26.263	15.0582	4.44736e-07	7.18171e-06	7.20995	2.22045e-16	6.00575e-17	6.00575e-17	WT - Control	limma	4.44736e-07	7.18171e-06	TRUE	enriched hit	7.29899
NSR1	P27476	Nuclear localization sequence-binding protein OS=Saccharomyces cerevisiae (strain ATCC 204508 / S288c) GN=NSR1 PE=1 SV=1	1	1	3	3	11	7.31068	3.4682	24.7843	14.9543	4.68852e-07	7.18171e-06	7.15796	2.22045e-16	6.00575e-17	6.00575e-17	WT - Control	limma	4.68852e-07	7.18171e-06	TRUE	enriched hit	7.31068
YAF9	P53930	Protein AF-9 homolog OS=Saccharomyces cerevisiae (strain ATCC 204508 / S288c) GN=YAF9 PE=1 SV=1	1	1	3	3	2	5.95231	2.98564	21.3518	14.8907	4.84335e-07	7.18171e-06	7.12593	2.22045e-16	6.00575e-17	6.00575e-17	WT - Control	limma	4.84335e-07	7.18171e-06	TRUE	enriched hit	5.95231
THS1	P04801	Threonine--tRNA ligase, cytoplasmic OS=Saccharomyces cerevisiae (strain ATCC 204508 / S288c) GN=THS1 PE=1 SV=2	1	1	3	3	14	7.17417	4.5305	24.3992	14.857	4.9277e-07	7.18171e-06	7.10889	2.22045e-16	6.00575e-17	6.00575e-17	WT - Control	limma	4.9277e-07	7.18171e-06	TRUE	enriched hit	7.17417
HFD1	Q04458	Fatty aldehyde dehydrogenase HFD1 OS=Saccharomyces cerevisiae (strain ATCC 204508 / S288c) GN=HFD1 PE=1 SV=1	1	1	3	3	3	6.23617	3.17729	21.726	14.8317	4.99222e-07	7.18171e-06	7.09605	2.22045e-16	6.00575e-17	6.00575e-17	WT - Control	limma	4.99222e-07	7.18171e-06	TRUE	enriched hit	6.23617
DED1	P06634	ATP-dependent RNA helicase DED1 OS=Saccharomyces cerevisiae (strain ATCC 204508 / S288c) GN=DED1 PE=1 SV=2	1	1	3	3	7	6.66594	3.76112	23.7082	14.7793	5.12858e-07	7.18171e-06	7.06944	2.22045e-16	6.00575e-17	6.00575e-17	WT - Control	limma	5.12858e-07	7.18171e-06	TRUE	enriched hit	6.66594
RPL14A|RPL14B	P36105|P38754	60S ribosomal protein L14-A OS=Saccharomyces cerevisiae (strain ATCC 204508 / S288c) GN=RPL14A PE=1 SV=1|60S ribosomal protein L14-B OS=Saccharomyces cerevisiae (strain ATCC 204508 / S288c) GN=RPL14B PE=1 SV=1	1	1	3	3	7	8.14976	3.4443	25.43	14.7264	5.27065e-07	7.18171e-06	7.04243	2.22045e-16	6.00575e-17	6.00575e-17	WT - Control	limma	5.27065e-07	7.18171e-06	TRUE	enriched hit	8.14976
UGP1	P32861	UTP--glucose-1-phosphate uridylyltransferase OS=Saccharomyces cerevisiae (strain ATCC 204508 / S288c) GN=UGP1 PE=1 SV=1	1	1	3	3	6	6.79478	2.70183	23.9644	14.717	5.29616e-07	7.18171e-06	7.03765	2.22045e-16	6.00575e-17	6.00575e-17	WT - Control	limma	5.29616e-07	7.18171e-06	TRUE	enriched hit	6.79478
ABF2	Q02486	ARS-binding factor 2, mitochondrial OS=Saccharomyces cerevisiae (strain ATCC 204508 / S288c) GN=ABF2 PE=1 SV=1	1	1	3	3	8	7.47865	3.09345	24.5179	14.6833	5.38953e-07	7.18171e-06	7.02037	2.22045e-16	6.00575e-17	6.00575e-17	WT - Control	limma	5.38953e-07	7.18171e-06	TRUE	enriched hit	7.47865
RSR1	P13856	Ras-related protein RSR1 OS=Saccharomyces cerevisiae (strain ATCC 204508 / S288c) GN=RSR1 PE=3 SV=1	1	1	3	3	2	5.57726	3.22626	20.8071	14.655	5.46928e-07	7.18171e-06	7.00583	2.22045e-16	6.00575e-17	6.00575e-17	WT - Control	limma	5.46928e-07	7.18171e-06	TRUE	enriched hit	5.57726
ACH1	P32316	Acetyl-CoA hydrolase OS=Saccharomyces cerevisiae (strain ATCC 204508 / S288c) GN=ACH1 PE=1 SV=2	1	1	3	3	12	7.1744	2.98146	24.3212	14.5625	5.73924e-07	7.18171e-06	6.9581	2.22045e-16	6.00575e-17	6.00575e-17	WT - Control	limma	5.73924e-07	7.18171e-06	TRUE	enriched hit	7.1744
SUI2	P20459	Eukaryotic translation initiation factor 2 subunit alpha OS=Saccharomyces cerevisiae (strain ATCC 204508 / S288c) GN=SUI2 PE=1 SV=1	1	1	3	3	2	5.89293	3.61704	20.679	14.5542	5.76422e-07	7.18171e-06	6.9538	2.22045e-16	6.00575e-17	6.00575e-17	WT - Control	limma	5.76422e-07	7.18171e-06	TRUE	enriched hit	5.89293
RFC2	P40348	Replication factor C subunit 2 OS=Saccharomyces cerevisiae (strain ATCC 204508 / S288c) GN=RFC2 PE=1 SV=1	1	1	3	3	2	5.92217	2.8798	21.1137	14.5417	5.80211e-07	7.18171e-06	6.9473	2.22045e-16	6.00575e-17	6.00575e-17	WT - Control	limma	5.80211e-07	7.18171e-06	TRUE	enriched hit	5.92217
EGD1	Q02642	Nascent polypeptide-associated complex subunit beta-1 OS=Saccharomyces cerevisiae (strain ATCC 204508 / S288c) GN=EGD1 PE=1 SV=2	1	1	3	3	4	6.54174	4.37466	22.6045	14.5408	5.80492e-07	7.18171e-06	6.94682	2.22045e-16	6.00575e-17	6.00575e-17	WT - Control	limma	5.80492e-07	7.18171e-06	TRUE	enriched hit	6.54174
ACO1	P19414	Aconitate hydratase, mitochondrial OS=Saccharomyces cerevisiae (strain ATCC 204508 / S288c) GN=ACO1 PE=1 SV=2	1	1	3	3	10	6.89283	3.07815	24.8426	14.476	6.00546e-07	7.18171e-06	6.91313	2.22045e-16	6.00575e-17	6.00575e-17	WT - Control	limma	6.00546e-07	7.18171e-06	TRUE	enriched hit	6.89283
ARO4	P32449	Phospho-2-dehydro-3-deoxyheptonate aldolase, tyrosine-inhibited OS=Saccharomyces cerevisiae (strain ATCC 204508 / S288c) GN=ARO4 PE=1 SV=2	1	1	3	3	2	5.99598	2.74661	21.9355	14.4575	6.06415e-07	7.18171e-06	6.90347	2.22045e-16	6.00575e-17	6.00575e-17	WT - Control	limma	6.06415e-07	7.18171e-06	TRUE	enriched hit	5.99598
PDH1	Q12428	Probable 2-methylcitrate dehydratase OS=Saccharomyces cerevisiae (strain ATCC 204508 / S288c) GN=PDH1 PE=1 SV=1	1	1	3	3	8	7.23103	3.05285	23.3323	14.432	6.14612e-07	7.18171e-06	6.89014	2.22045e-16	6.00575e-17	6.00575e-17	WT - Control	limma	6.14612e-07	7.18171e-06	TRUE	enriched hit	7.23103
RNP1	P32385	Ribonucleoprotein 1 OS=Saccharomyces cerevisiae (strain ATCC 204508 / S288c) GN=RNP1 PE=3 SV=2	1	1	3	3	8	7.00532	4.30695	23.4876	14.3734	6.33942e-07	7.18171e-06	6.85937	2.22045e-16	6.00575e-17	6.00575e-17	WT - Control	limma	6.33942e-07	7.18171e-06	TRUE	enriched hit	7.00532
HMO1	Q03973	High mobility group protein 1 OS=Saccharomyces cerevisiae (strain ATCC 204508 / S288c) GN=HMO1 PE=1 SV=1	1	1	3	3	4	6.89528	3.77207	23.3919	14.3663	6.36302e-07	7.18171e-06	6.85567	2.22045e-16	6.00575e-17	6.00575e-17	WT - Control	limma	6.36302e-07	7.18171e-06	TRUE	enriched hit	6.89528
RSM23	Q01163	37S ribosomal protein S23, mitochondrial OS=Saccharomyces cerevisiae (strain ATCC 204508 / S288c) GN=RSM23 PE=1 SV=3	1	1	3	3	4	6.29498	2.85397	22.6366	14.3465	6.43035e-07	7.18171e-06	6.84521	2.22045e-16	6.00575e-17	6.00575e-17	WT - Control	limma	6.43035e-07	7.18171e-06	TRUE	enriched hit	6.29498
ARP8	Q12386	Actin-like protein ARP8 OS=Saccharomyces cerevisiae (strain ATCC 204508 / S288c) GN=ARP8 PE=1 SV=1	1	1	3	3	4	6.03831	3.04494	22.334	14.3198	6.52209e-07	7.18171e-06	6.83112	2.22045e-16	6.00575e-17	6.00575e-17	WT - Control	limma	6.52209e-07	7.18171e-06	TRUE	enriched hit	6.03831
SWC4	P53201	SWR1-complex protein 4 OS=Saccharomyces cerevisiae (strain ATCC 204508 / S288c) GN=SWC4 PE=1 SV=1	1	1	3	3	2	5.83951	3.79665	20.0969	14.2964	6.60348e-07	7.18171e-06	6.81878	2.22045e-16	6.00575e-17	6.00575e-17	WT - Control	limma	6.60348e-07	7.18171e-06	TRUE	enriched hit	5.83951
PIL1	P53252	Sphingolipid long chain base-responsive protein PIL1 OS=Saccharomyces cerevisiae (strain ATCC 204508 / S288c) GN=PIL1 PE=1 SV=1	1	1	3	3	4	6.64226	2.62849	22.5897	14.2918	6.61977e-07	7.18171e-06	6.81632	2.22045e-16	6.00575e-17	6.00575e-17	WT - Control	limma	6.61977e-07	7.18171e-06	TRUE	enriched hit	6.64226
SLA1	P32790	Actin cytoskeleton-regulatory complex protein SLA1 OS=Saccharomyces cerevisiae (strain ATCC 204508 / S288c) GN=SLA1 PE=1 SV=1	1	1	3	3	3	5.93178	2.71037	20.614	14.2907	6.62344e-07	7.18171e-06	6.81577	2.22045e-16	6.00575e-17	6.00575e-17	WT - Control	limma	6.62344e-07	7.18171e-06	TRUE	enriched hit	5.93178
IOC3	P43596	ISWI one complex protein 3 OS=Saccharomyces cerevisiae (strain ATCC 204508 / S288c) GN=IOC3 PE=1 SV=1	1	1	3	3	2	6.83588	3.65651	21.0802	14.2427	6.79499e-07	7.26394e-06	6.79031	2.22045e-16	6.00575e-17	6.00575e-17	WT - Control	limma	6.79499e-07	7.26394e-06	TRUE	enriched hit	6.83588
RVB1	Q03940	RuvB-like protein 1 OS=Saccharomyces cerevisiae (strain ATCC 204508 / S288c) GN=RVB1 PE=1 SV=1	1	1	3	3	4	6.53464	2.63438	21.5985	14.1776	7.03594e-07	7.41705e-06	6.75559	2.22045e-16	6.00575e-17	6.00575e-17	WT - Control	limma	7.03594e-07	7.41705e-06	TRUE	enriched hit	6.53464
YLR455W	Q06188	PWWP domain-containing protein YLR455W OS=Saccharomyces cerevisiae (strain ATCC 204508 / S288c) GN=YLR455W PE=1 SV=1	1	1	3	3	6	7.09205	3.65619	23.9725	14.1312	7.21331e-07	7.49987e-06	6.73076	2.22045e-16	6.00575e-17	6.00575e-17	WT - Control	limma	7.21331e-07	7.49987e-06	TRUE	enriched hit	7.09205
STM1	P39015	Suppressor protein STM1 OS=Saccharomyces cerevisiae (strain ATCC 204508 / S288c) GN=STM1 PE=1 SV=3	1	1	3	3	9	8.05368	3.84198	25.2506	14.0698	7.45566e-07	7.59865e-06	6.69778	2.22045e-16	6.00575e-17	6.00575e-17	WT - Control	limma	7.45566e-07	7.59865e-06	TRUE	enriched hit	8.05368
IRR1	P40541	Cohesin subunit SCC3 OS=Saccharomyces cerevisiae (strain ATCC 204508 / S288c) GN=IRR1 PE=1 SV=1	1	1	3	3	11	6.66578	3.18033	23.5092	14.0324	7.60795e-07	7.59865e-06	6.67758	2.22045e-16	6.00575e-17	6.00575e-17	WT - Control	limma	7.60795e-07	7.59865e-06	TRUE	enriched hit	6.66578
IMG1	P25626	54S ribosomal protein IMG1, mitochondrial OS=Saccharomyces cerevisiae (strain ATCC 204508 / S288c) GN=IMG1 PE=1 SV=1	1	1	3	3	2	5.60623	2.56705	20.7045	14.0322	7.60866e-07	7.59865e-06	6.67749	2.22045e-16	6.00575e-17	6.00575e-17	WT - Control	limma	7.60866e-07	7.59865e-06	TRUE	enriched hit	5.60623
RPS24A|RPS24B	P0CX31|P0CX32	40S ribosomal protein S24-A OS=Saccharomyces cerevisiae (strain ATCC 204508 / S288c) GN=RPS24A PE=1 SV=1|40S ribosomal protein S24-B OS=Saccharomyces cerevisiae (strain ATCC 204508 / S288c) GN=RPS24B PE=1 SV=1	1	1	3	3	6	7.29494	5.0181	24.3578	13.9564	7.9282e-07	7.81494e-06	6.63637	2.22045e-16	6.00575e-17	6.00575e-17	WT - Control	limma	7.9282e-07	7.81494e-06	TRUE	enriched hit	7.29494
HSP82	P02829	ATP-dependent molecular chaperone HSP82 OS=Saccharomyces cerevisiae (strain ATCC 204508 / S288c) GN=HSP82 PE=1 SV=1	1	1	3	3	2	6.17547	2.74803	21.0437	13.8551	8.37863e-07	8.0412e-06	6.58106	2.22045e-16	6.00575e-17	6.00575e-17	WT - Control	limma	8.37863e-07	8.0412e-06	TRUE	enriched hit	6.17547
UBP6	P43593	Ubiquitin carboxyl-terminal hydrolase 6 OS=Saccharomyces cerevisiae (strain ATCC 204508 / S288c) GN=UBP6 PE=1 SV=1	1	1	3	3	2	5.81619	2.7461	21.3175	13.8345	8.47363e-07	8.0412e-06	6.56976	2.22045e-16	6.00575e-17	6.00575e-17	WT - Control	limma	8.47363e-07	8.0412e-06	TRUE	enriched hit	5.81619
CAD1	P24813	AP-1-like transcription activator YAP2 OS=Saccharomyces cerevisiae (strain ATCC 204508 / S288c) GN=CAD1 PE=1 SV=2	1	1	3	3	3	5.69242	3.63313	21.647	13.8149	8.56554e-07	8.0412e-06	6.55895	2.22045e-16	6.00575e-17	6.00575e-17	WT - Control	limma	8.56554e-07	8.0412e-06	TRUE	enriched hit	5.69242
SHM1	P37292	Serine hydroxymethyltransferase, mitochondrial OS=Saccharomyces cerevisiae (strain ATCC 204508 / S288c) GN=SHM1 PE=1 SV=2	1	1	3	3	2	6.2655	3.07505	21.7333	13.7858	8.70348e-07	8.0412e-06	6.54294	2.22045e-16	6.00575e-17	6.00575e-17	WT - Control	limma	8.70348e-07	8.0412e-06	TRUE	enriched hit	6.2655
RPL30	P14120	60S ribosomal protein L30 OS=Saccharomyces cerevisiae (strain ATCC 204508 / S288c) GN=RPL30 PE=1 SV=3	1	1	3	3	3	6.28767	4.02046	24.3378	13.7816	8.72356e-07	8.0412e-06	6.54063	2.22045e-16	6.00575e-17	6.00575e-17	WT - Control	limma	8.72356e-07	8.0412e-06	TRUE	enriched hit	6.28767
ISW1	P38144	ISWI chromatin-remodeling complex ATPase ISW1 OS=Saccharomyces cerevisiae (strain ATCC 204508 / S288c) GN=ISW1 PE=1 SV=2	1	1	3	3	18	7.37807	4.25628	25.0246	13.7604	8.8257e-07	8.0412e-06	6.52895	2.22045e-16	6.00575e-17	6.00575e-17	WT - Control	limma	8.8257e-07	8.0412e-06	TRUE	enriched hit	7.37807
NHP6A	P11632	Non-histone chromosomal protein 6A OS=Saccharomyces cerevisiae (strain ATCC 204508 / S288c) GN=NHP6A PE=1 SV=1	1	1	3	3	4	7.35182	3.45415	22.7921	13.7454	8.89935e-07	8.0412e-06	6.52062	2.22045e-16	6.00575e-17	6.00575e-17	WT - Control	limma	8.89935e-07	8.0412e-06	TRUE	enriched hit	7.35182
ATP1	P07251	ATP synthase subunit alpha, mitochondrial OS=Saccharomyces cerevisiae (strain ATCC 204508 / S288c) GN=ATP1 PE=1 SV=5	1	1	3	3	16	7.31594	2.67488	24.7881	13.6995	9.12788e-07	8.06044e-06	6.49517	2.22045e-16	6.00575e-17	6.00575e-17	WT - Control	limma	9.12788e-07	8.06044e-06	TRUE	enriched hit	7.31594
CIC1	P38779	Proteasome-interacting protein CIC1 OS=Saccharomyces cerevisiae (strain ATCC 204508 / S288c) GN=CIC1 PE=1 SV=1	1	1	3	3	6	6.59766	3.12571	23.0952	13.6858	9.19736e-07	8.06044e-06	6.48756	2.22045e-16	6.00575e-17	6.00575e-17	WT - Control	limma	9.19736e-07	8.06044e-06	TRUE	enriched hit	6.59766
TKL1	P23254	Transketolase 1 OS=Saccharomyces cerevisiae (strain ATCC 204508 / S288c) GN=TKL1 PE=1 SV=4	1	1	3	3	10	6.63938	2.66109	24.008	13.6548	9.35667e-07	8.06044e-06	6.47031	2.22045e-16	6.00575e-17	6.00575e-17	WT - Control	limma	9.35667e-07	8.06044e-06	TRUE	enriched hit	6.63938
CLU1	Q03690	Clustered mitochondria protein 1 OS=Saccharomyces cerevisiae (strain ATCC 204508 / S288c) GN=CLU1 PE=1 SV=1	1	1	3	3	21	7.10819	3.91288	25.4514	13.654	9.36078e-07	8.06044e-06	6.46987	2.22045e-16	6.00575e-17	6.00575e-17	WT - Control	limma	9.36078e-07	8.06044e-06	TRUE	enriched hit	7.10819
ASC1	P38011	Guanine nucleotide-binding protein subunit beta-like protein OS=Saccharomyces cerevisiae (strain ATCC 204508 / S288c) GN=ASC1 PE=1 SV=4	1	1	3	3	3	6.77331	2.74307	22.5647	13.6366	9.45163e-07	8.06044e-06	6.46017	2.22045e-16	6.00575e-17	6.00575e-17	WT - Control	limma	9.45163e-07	8.06044e-06	TRUE	enriched hit	6.77331
LEU4	P06208|P06208-2	2-isopropylmalate synthase OS=Saccharomyces cerevisiae (strain ATCC 204508 / S288c) GN=LEU4 PE=1 SV=1|Isoform Cytoplasmic of 2-isopropylmalate synthase OS=Saccharomyces cerevisiae (strain ATCC 204508 / S288c) GN=LEU4	1	1	3	3	3	5.85207	3.02527	22.063	13.5885	9.70805e-07	8.18712e-06	6.43326	2.22045e-16	6.00575e-17	6.00575e-17	WT - Control	limma	9.70805e-07	8.18712e-06	TRUE	enriched hit	5.85207
SEC63	P14906	Protein translocation protein SEC63 OS=Saccharomyces cerevisiae (strain ATCC 204508 / S288c) GN=SEC63 PE=1 SV=2	1	1	3	3	4	5.81788	2.98742	21.8394	13.5582	9.87366e-07	8.22265e-06	6.41625	2.22045e-16	6.00575e-17	6.00575e-17	WT - Control	limma	9.87366e-07	8.22265e-06	TRUE	enriched hit	5.81788
LPX1	Q12405	Peroxisomal membrane protein LPX1 OS=Saccharomyces cerevisiae (strain ATCC 204508 / S288c) GN=LPX1 PE=1 SV=1	1	1	3	3	3	5.89417	2.59783	21.8327	13.5236	1.00662e-06	8.22265e-06	6.39682	2.22045e-16	6.00575e-17	6.00575e-17	WT - Control	limma	1.00662e-06	8.22265e-06	TRUE	enriched hit	5.89417
PMA1	P05030	Plasma membrane ATPase 1 OS=Saccharomyces cerevisiae (strain ATCC 204508 / S288c) GN=PMA1 PE=1 SV=2	1	1	3	3	12	7.53497	2.68516	24.6971	13.5221	1.00752e-06	8.22265e-06	6.39592	2.22045e-16	6.00575e-17	6.00575e-17	WT - Control	limma	1.00752e-06	8.22265e-06	TRUE	enriched hit	7.53497
RPS16A|RPS16B	P0CX51|P0CX52	40S ribosomal protein S16-A OS=Saccharomyces cerevisiae (strain ATCC 204508 / S288c) GN=RPS16A PE=1 SV=1|40S ribosomal protein S16-B OS=Saccharomyces cerevisiae (strain ATCC 204508 / S288c) GN=RPS16B PE=1 SV=1	1	1	3	3	7	7.90044	2.53229	24.7404	13.4939	1.02355e-06	8.23458e-06	6.38004	2.22045e-16	6.00575e-17	6.00575e-17	WT - Control	limma	1.02355e-06	8.23458e-06	TRUE	enriched hit	7.90044
MDH2	P22133	Malate dehydrogenase, cytoplasmic OS=Saccharomyces cerevisiae (strain ATCC 204508 / S288c) GN=MDH2 PE=1 SV=2	1	1	3	3	3	6.3563	3.16177	22.4516	13.4815	1.03068e-06	8.23458e-06	6.37305	2.22045e-16	6.00575e-17	6.00575e-17	WT - Control	limma	1.03068e-06	8.23458e-06	TRUE	enriched hit	6.3563
NSA1	P53136	Ribosome biogenesis protein NSA1 OS=Saccharomyces cerevisiae (strain ATCC 204508 / S288c) GN=NSA1 PE=1 SV=1	1	1	3	3	2	5.99642	3.15303	20.7077	13.4309	1.06048e-06	8.38435e-06	6.34434	2.22045e-16	6.00575e-17	6.00575e-17	WT - Control	limma	1.06048e-06	8.38435e-06	TRUE	enriched hit	5.99642
NOP2	P40991	25S rRNA (cytosine(2870)-C(5))-methyltransferase OS=Saccharomyces cerevisiae (strain ATCC 204508 / S288c) GN=NOP2 PE=1 SV=1	1	1	3	3	2	6.46084	3.01961	21.136	13.3906	1.08483e-06	8.38435e-06	6.32145	4.44089e-16	1.14169e-16	1.64729e-15	WT - Control	limma	1.08483e-06	8.38435e-06	TRUE	enriched hit	6.46084
RPS31	P05759	Ubiquitin-40S ribosomal protein S31 OS=Saccharomyces cerevisiae (strain ATCC 204508 / S288c) GN=RPS31 PE=1 SV=3	1	1	3	3	8	7.3964	2.76515	24.5082	13.3558	1.10644e-06	8.38435e-06	6.30156	4.44089e-16	1.14169e-16	1.64729e-15	WT - Control	limma	1.10644e-06	8.38435e-06	TRUE	enriched hit	7.3964
ADE4	P04046	Amidophosphoribosyltransferase OS=Saccharomyces cerevisiae (strain ATCC 204508 / S288c) GN=ADE4 PE=1 SV=2	1	1	3	3	2	5.69251	2.50475	20.3567	13.3435	1.11414e-06	8.38435e-06	6.29456	4.44089e-16	1.14169e-16	1.64729e-15	WT - Control	limma	1.11414e-06	8.38435e-06	TRUE	enriched hit	5.69251
GDI1	P39958	Rab GDP-dissociation inhibitor OS=Saccharomyces cerevisiae (strain ATCC 204508 / S288c) GN=GDI1 PE=1 SV=1	1	1	3	3	4	6.20966	2.69859	22.5167	13.3266	1.12486e-06	8.38435e-06	6.2849	4.44089e-16	1.14169e-16	1.64729e-15	WT - Control	limma	1.12486e-06	8.38435e-06	TRUE	enriched hit	6.20966
TFC4	P33339	Transcription factor tau 131 kDa subunit OS=Saccharomyces cerevisiae (strain ATCC 204508 / S288c) GN=TFC4 PE=1 SV=1	1	1	3	3	4	5.77074	3.06918	21.4698	13.3132	1.13346e-06	8.38435e-06	6.27721	4.44089e-16	1.14169e-16	1.64729e-15	WT - Control	limma	1.13346e-06	8.38435e-06	TRUE	enriched hit	5.77074
SRP72	P38688	Signal recognition particle subunit SRP72 OS=Saccharomyces cerevisiae (strain ATCC 204508 / S288c) GN=SRP72 PE=1 SV=2	1	1	3	3	2	6.0783	3.03483	20.8587	13.2671	1.16356e-06	8.38435e-06	6.25075	6.66134e-16	1.65517e-16	1.64729e-15	WT - Control	limma	1.16356e-06	8.38435e-06	TRUE	enriched hit	6.0783
RSC8	P43609	Chromatin structure-remodeling complex protein RSC8 OS=Saccharomyces cerevisiae (strain ATCC 204508 / S288c) GN=RSC8 PE=1 SV=1	1	1	3	3	4	5.74777	2.81304	21.5312	13.2387	1.18263e-06	8.38435e-06	6.23434	6.66134e-16	1.65517e-16	1.64729e-15	WT - Control	limma	1.18263e-06	8.38435e-06	TRUE	enriched hit	5.74777
RPL35A|RPL35B	P0CX84|P0CX85	60S ribosomal protein L35-A OS=Saccharomyces cerevisiae (strain ATCC 204508 / S288c) GN=RPL35A PE=1 SV=1|60S ribosomal protein L35-B OS=Saccharomyces cerevisiae (strain ATCC 204508 / S288c) GN=RPL35B PE=1 SV=1	1	1	3	3	4	7.89808	2.86021	24.7528	13.2347	1.18533e-06	8.38435e-06	6.23203	6.66134e-16	1.65517e-16	1.64729e-15	WT - Control	limma	1.18533e-06	8.38435e-06	TRUE	enriched hit	7.89808
GUS1	P46655	Glutamate--tRNA ligase, cytoplasmic OS=Saccharomyces cerevisiae (strain ATCC 204508 / S288c) GN=GUS1 PE=1 SV=3	1	1	3	3	5	6.20945	2.8389	22.2065	13.2089	1.20293e-06	8.38435e-06	6.21714	8.88178e-16	2.13538e-16	1.64729e-15	WT - Control	limma	1.20293e-06	8.38435e-06	TRUE	enriched hit	6.20945
TIF4631	P39935	Eukaryotic initiation factor 4F subunit p150 OS=Saccharomyces cerevisiae (strain ATCC 204508 / S288c) GN=TIF4631 PE=1 SV=2	1	1	3	3	3	5.93638	3.08565	21.5178	13.1903	1.21578e-06	8.38435e-06	6.20639	8.88178e-16	2.13538e-16	1.64729e-15	WT - Control	limma	1.21578e-06	8.38435e-06	TRUE	enriched hit	5.93638
REP1	P03871	Partitioning protein REP1 OS=Saccharomyces cerevisiae (strain ATCC 204508 / S288c) GN=REP1 PE=1 SV=1	1	1	3	3	2	5.7277	2.63995	20.216	13.1753	1.22628e-06	8.38435e-06	6.1977	1.11022e-15	2.58544e-16	1.64729e-15	WT - Control	limma	1.22628e-06	8.38435e-06	TRUE	enriched hit	5.7277
RSP5	P39940	E3 ubiquitin-protein ligase RSP5 OS=Saccharomyces cerevisiae (strain ATCC 204508 / S288c) GN=RSP5 PE=1 SV=1	1	1	3	3	3	5.88234	2.6912	21.7423	13.1621	1.2356e-06	8.38435e-06	6.19004	1.11022e-15	2.58544e-16	1.64729e-15	WT - Control	limma	1.2356e-06	8.38435e-06	TRUE	enriched hit	5.88234
CKA1	P15790	Casein kinase II subunit alpha OS=Saccharomyces cerevisiae (strain ATCC 204508 / S288c) GN=CKA1 PE=1 SV=1	1	1	3	3	8	6.59454	2.90605	23.1049	13.1444	1.24822e-06	8.38435e-06	6.17976	1.11022e-15	2.58544e-16	1.64729e-15	WT - Control	limma	1.24822e-06	8.38435e-06	TRUE	enriched hit	6.59454
RPS15	Q01855	40S ribosomal protein S15 OS=Saccharomyces cerevisiae (strain ATCC 204508 / S288c) GN=RPS15 PE=1 SV=1	1	1	3	3	3	6.7978	3.26224	23.461	13.1437	1.24873e-06	8.38435e-06	6.17935	1.11022e-15	2.58544e-16	1.64729e-15	WT - Control	limma	1.24873e-06	8.38435e-06	TRUE	enriched hit	6.7978
SHM2	P37291	Serine hydroxymethyltransferase, cytosolic OS=Saccharomyces cerevisiae (strain ATCC 204508 / S288c) GN=SHM2 PE=1 SV=2	1	1	3	3	10	7.21827	2.71917	24.5154	13.1435	1.24892e-06	8.38435e-06	6.17919	1.11022e-15	2.58544e-16	1.64729e-15	WT - Control	limma	1.24892e-06	8.38435e-06	TRUE	enriched hit	7.21827
IES2	P40154	Ino eighty subunit 2 OS=Saccharomyces cerevisiae (strain ATCC 204508 / S288c) GN=IES2 PE=1 SV=1	1	1	3	3	2	5.72904	2.4173	21.0915	13.124	1.26295e-06	8.38435e-06	6.16789	1.33227e-15	3.0081e-16	6.40613e-15	WT - Control	limma	1.26295e-06	8.38435e-06	TRUE	enriched hit	5.72904
GCD11	P32481	Eukaryotic translation initiation factor 2 subunit gamma OS=Saccharomyces cerevisiae (strain ATCC 204508 / S288c) GN=GCD11 PE=1 SV=1	1	1	3	3	3	6.06804	3.13635	21.7652	13.1211	1.26507e-06	8.38435e-06	6.1662	1.33227e-15	3.0081e-16	6.40613e-15	WT - Control	limma	1.26507e-06	8.38435e-06	TRUE	enriched hit	6.06804
MPH1	P40562	ATP-dependent DNA helicase MPH1 OS=Saccharomyces cerevisiae (strain ATCC 204508 / S288c) GN=MPH1 PE=1 SV=1	1	1	3	3	2	5.65829	2.5548	20.8494	13.1178	1.26751e-06	8.38435e-06	6.16425	1.33227e-15	3.0081e-16	6.40613e-15	WT - Control	limma	1.26751e-06	8.38435e-06	TRUE	enriched hit	5.65829
RPS25B|RPS25A	P0C0T4|Q3E792	40S ribosomal protein S25-B OS=Saccharomyces cerevisiae (strain ATCC 204508 / S288c) GN=RPS25B PE=1 SV=1|40S ribosomal protein S25-A OS=Saccharomyces cerevisiae (strain ATCC 204508 / S288c) GN=RPS25A PE=1 SV=1	1	1	3	3	5	7.38782	2.79646	24.7516	13.1139	1.27036e-06	8.38435e-06	6.16197	1.33227e-15	3.0081e-16	6.40613e-15	WT - Control	limma	1.27036e-06	8.38435e-06	TRUE	enriched hit	7.38782
RPS3	P05750	40S ribosomal protein S3 OS=Saccharomyces cerevisiae (strain ATCC 204508 / S288c) GN=RPS3 PE=1 SV=5	1	1	3	3	9	7.37885	3.13854	25.0631	13.0461	1.32107e-06	8.64392e-06	6.12234	1.9984e-15	4.40864e-16	6.40613e-15	WT - Control	limma	1.32107e-06	8.64392e-06	TRUE	enriched hit	7.37885
RVB2	Q12464	RuvB-like protein 2 OS=Saccharomyces cerevisiae (strain ATCC 204508 / S288c) GN=RVB2 PE=1 SV=1	1	1	3	3	8	6.60828	2.7995	23.2421	13.021	1.34041e-06	8.65944e-06	6.10762	2.22045e-15	4.86132e-16	6.40613e-15	WT - Control	limma	1.34041e-06	8.65944e-06	TRUE	enriched hit	6.60828
MRPL22	P53881	54S ribosomal protein L22, mitochondrial OS=Saccharomyces cerevisiae (strain ATCC 204508 / S288c) GN=MRPL22 PE=1 SV=2	1	1	3	3	4	6.25294	3.02899	22.4649	13.0135	1.34626e-06	8.65944e-06	6.1032	2.22045e-15	4.86132e-16	6.40613e-15	WT - Control	limma	1.34626e-06	8.65944e-06	TRUE	enriched hit	6.25294
MRPL10	P36520	54S ribosomal protein L10, mitochondrial OS=Saccharomyces cerevisiae (strain ATCC 204508 / S288c) GN=MRPL10 PE=1 SV=2	1	1	3	3	2	6.62826	3.06705	22.729	12.9851	1.36864e-06	8.7055e-06	6.08649	2.66454e-15	5.74637e-16	6.40613e-15	WT - Control	limma	1.36864e-06	8.7055e-06	TRUE	enriched hit	6.62826
TAF5	P38129	Transcription initiation factor TFIID subunit 5 OS=Saccharomyces cerevisiae (strain ATCC 204508 / S288c) GN=TAF5 PE=1 SV=1	1	1	3	3	4	5.78647	2.62854	21.7077	12.9617	1.38738e-06	8.7055e-06	6.0727	2.88658e-15	6.17904e-16	6.40613e-15	WT - Control	limma	1.38738e-06	8.7055e-06	TRUE	enriched hit	5.78647
ISW2	Q08773	ISWI chromatin-remodeling complex ATPase ISW2 OS=Saccharomyces cerevisiae (strain ATCC 204508 / S288c) GN=ISW2 PE=1 SV=1	1	1	3	3	4	5.74283	2.58735	21.3565	12.9421	1.40337e-06	8.7055e-06	6.06108	3.33067e-15	7.02541e-16	6.40613e-15	WT - Control	limma	1.40337e-06	8.7055e-06	TRUE	enriched hit	5.74283
MND1	P53102	Meiotic nuclear division protein 1 OS=Saccharomyces cerevisiae (strain ATCC 204508 / S288c) GN=MND1 PE=1 SV=2	1	1	3	3	2	6.10696	2.78311	22.2875	12.9374	1.40717e-06	8.7055e-06	6.05833	3.33067e-15	7.02541e-16	6.40613e-15	WT - Control	limma	1.40717e-06	8.7055e-06	TRUE	enriched hit	6.10696
BRX1	Q08235	Ribosome biogenesis protein BRX1 OS=Saccharomyces cerevisiae (strain ATCC 204508 / S288c) GN=BRX1 PE=1 SV=2	1	1	3	3	2	6.87335	2.6858	22.5376	12.9259	1.41668e-06	8.7055e-06	6.0515	3.55271e-15	7.43938e-16	8.07173e-15	WT - Control	limma	1.41668e-06	8.7055e-06	TRUE	enriched hit	6.87335
PCT1	P13259	Choline-phosphate cytidylyltransferase OS=Saccharomyces cerevisiae (strain ATCC 204508 / S288c) GN=PCT1 PE=1 SV=2	1	1	3	3	2	5.95527	3.37764	20.8432	12.9192	1.42224e-06	8.7055e-06	6.04752	3.55271e-15	7.43938e-16	8.07173e-15	WT - Control	limma	1.42224e-06	8.7055e-06	TRUE	enriched hit	5.95527
SPT5	P27692	Transcription elongation factor SPT5 OS=Saccharomyces cerevisiae (strain ATCC 204508 / S288c) GN=SPT5 PE=1 SV=1	1	1	3	3	18	6.73568	3.22978	24.6807	12.8808	1.4545e-06	8.74487e-06	6.02476	4.44089e-15	9.08979e-16	8.07173e-15	WT - Control	limma	1.4545e-06	8.74487e-06	TRUE	enriched hit	6.73568
NOP13	P53883	Nucleolar protein 13 OS=Saccharomyces cerevisiae (strain ATCC 204508 / S288c) GN=NOP13 PE=1 SV=2	1	1	3	3	2	5.45305	2.41064	20.3545	12.8697	1.46402e-06	8.74487e-06	6.01814	4.66294e-15	9.49084e-16	8.07173e-15	WT - Control	limma	1.46402e-06	8.74487e-06	TRUE	enriched hit	5.45305
JHD1	P40034	JmjC domain-containing histone demethylation protein 1 OS=Saccharomyces cerevisiae (strain ATCC 204508 / S288c) GN=JHD1 PE=1 SV=1	1	1	3	3	3	5.66936	2.59817	20.8288	12.8505	1.48057e-06	8.74487e-06	6.00672	5.10703e-15	1.02796e-15	1.72966e-14	WT - Control	limma	1.48057e-06	8.74487e-06	TRUE	enriched hit	5.66936
NHP6B	P11633	Non-histone chromosomal protein 6B OS=Saccharomyces cerevisiae (strain ATCC 204508 / S288c) GN=NHP6B PE=1 SV=3	1	1	3	3	5	7.72321	4.28071	24.5899	12.8464	1.48412e-06	8.74487e-06	6.00428	5.10703e-15	1.02796e-15	1.72966e-14	WT - Control	limma	1.48412e-06	8.74487e-06	TRUE	enriched hit	7.72321
ICL1	P28240	Isocitrate lyase OS=Saccharomyces cerevisiae (strain ATCC 204508 / S288c) GN=ICL1 PE=1 SV=1	1	1	3	3	12	7.21175	2.59733	25.4244	12.844	1.48628e-06	8.74487e-06	6.00281	5.10703e-15	1.02796e-15	1.72966e-14	WT - Control	limma	1.48628e-06	8.74487e-06	TRUE	enriched hit	7.21175
MRPL35	Q06678	54S ribosomal protein L35, mitochondrial OS=Saccharomyces cerevisiae (strain ATCC 204508 / S288c) GN=MRPL35 PE=1 SV=1	1	1	3	3	5	6.08354	2.74664	22.2266	12.8118	1.51465e-06	8.84321e-06	5.9836	5.9952e-15	1.19439e-15	1.72966e-14	WT - Control	limma	1.51465e-06	8.84321e-06	TRUE	enriched hit	6.08354
MST1	P07236	Threonine--tRNA ligase, mitochondrial OS=Saccharomyces cerevisiae (strain ATCC 204508 / S288c) GN=MST1 PE=1 SV=2	1	1	3	3	3	5.8967	3.24518	21.4035	12.7719	1.55067e-06	8.8968e-06	5.95971	7.32747e-15	1.43775e-15	1.72966e-14	WT - Control	limma	1.55067e-06	8.8968e-06	TRUE	enriched hit	5.8967
PDI1	P17967	Protein disulfide-isomerase OS=Saccharomyces cerevisiae (strain ATCC 204508 / S288c) GN=PDI1 PE=1 SV=2	1	1	3	3	5	6.38914	2.97596	22.8461	12.7671	1.55508e-06	8.8968e-06	5.95682	7.54952e-15	1.4776e-15	1.72966e-14	WT - Control	limma	1.55508e-06	8.8968e-06	TRUE	enriched hit	6.38914
SRM1	P21827	Guanine nucleotide exchange factor SRM1 OS=Saccharomyces cerevisiae (strain ATCC 204508 / S288c) GN=SRM1 PE=1 SV=1	1	1	3	3	4	6.32175	3.75626	21.7285	12.7629	1.55899e-06	8.8968e-06	5.95427	7.77156e-15	1.51724e-15	2.59448e-14	WT - Control	limma	1.55899e-06	8.8968e-06	TRUE	enriched hit	6.32175
RPL29	P05747	60S ribosomal protein L29 OS=Saccharomyces cerevisiae (strain ATCC 204508 / S288c) GN=RPL29 PE=1 SV=3	1	1	3	3	2	6.08376	3.80929	24.2965	12.7338	1.58603e-06	8.98356e-06	5.93678	8.88178e-15	1.71963e-15	2.59448e-14	WT - Control	limma	1.58603e-06	8.98356e-06	TRUE	enriched hit	6.08376
BDF1	P35817	Bromodomain-containing factor 1 OS=Saccharomyces cerevisiae (strain ATCC 204508 / S288c) GN=BDF1 PE=1 SV=3	1	1	3	3	6	5.91174	2.57962	22.7384	12.7114	1.60717e-06	9.03589e-06	5.92331	9.76996e-15	1.87913e-15	2.75464e-14	WT - Control	limma	1.60717e-06	9.03589e-06	TRUE	enriched hit	5.91174
HAS1	Q03532	ATP-dependent RNA helicase HAS1 OS=Saccharomyces cerevisiae (strain ATCC 204508 / S288c) GN=HAS1 PE=1 SV=1	1	1	3	3	7	6.09171	2.30609	22.9389	12.6656	1.65152e-06	9.21691e-06	5.89561	1.22125e-14	2.30953e-15	2.75464e-14	WT - Control	limma	1.65152e-06	9.21691e-06	TRUE	enriched hit	6.09171
SSE1	P32589	Heat shock protein homolog SSE1 OS=Saccharomyces cerevisiae (strain ATCC 204508 / S288c) GN=SSE1 PE=1 SV=4	1	1	3	3	8	6.51848	2.43583	24.19	12.6421	1.67473e-06	9.21889e-06	5.88139	1.37668e-14	2.57598e-15	2.75464e-14	WT - Control	limma	1.67473e-06	9.21889e-06	TRUE	enriched hit	6.51848
MGA2	P40578	Protein MGA2 OS=Saccharomyces cerevisiae (strain ATCC 204508 / S288c) GN=MGA2 PE=1 SV=1	1	1	3	3	2	6.48033	2.51459	20.2337	12.6407	1.67616e-06	9.21889e-06	5.88052	1.37668e-14	2.57598e-15	2.75464e-14	WT - Control	limma	1.67616e-06	9.21889e-06	TRUE	enriched hit	6.48033
SCP160	P06105	Protein SCP160 OS=Saccharomyces cerevisiae (strain ATCC 204508 / S288c) GN=SCP160 PE=1 SV=3	1	1	3	3	5	6.00433	2.45	22.1619	12.6249	1.69206e-06	9.22005e-06	5.87091	1.4877e-14	2.76289e-15	2.75464e-14	WT - Control	limma	1.69206e-06	9.22005e-06	TRUE	enriched hit	6.00433
RFA1	P22336	Replication factor A protein 1 OS=Saccharomyces cerevisiae (strain ATCC 204508 / S288c) GN=RFA1 PE=1 SV=1	1	1	3	3	11	6.35043	3.22207	23.1553	12.6095	1.70769e-06	9.22005e-06	5.86154	1.59872e-14	2.94701e-15	2.75464e-14	WT - Control	limma	1.70769e-06	9.22005e-06	TRUE	enriched hit	6.35043
BRN1	P38170	Condensin complex subunit 2 OS=Saccharomyces cerevisiae (strain ATCC 204508 / S288c) GN=BRN1 PE=1 SV=3	1	1	3	3	6	5.84866	2.62849	22.4918	12.5796	1.73846e-06	9.22005e-06	5.84334	1.84297e-14	3.34262e-15	2.75464e-14	WT - Control	limma	1.73846e-06	9.22005e-06	TRUE	enriched hit	5.84866
RPS20	P38701	40S ribosomal protein S20 OS=Saccharomyces cerevisiae (strain ATCC 204508 / S288c) GN=RPS20 PE=1 SV=3	1	1	3	3	6	7.24468	2.70501	24.0689	12.5723	1.74609e-06	9.22005e-06	5.83887	1.90958e-14	3.44831e-15	2.75464e-14	WT - Control	limma	1.74609e-06	9.22005e-06	TRUE	enriched hit	7.24468
NAT10	P53914	RNA cytidine acetyltransferase OS=Saccharomyces cerevisiae (strain ATCC 204508 / S288c) GN=NAT10 PE=1 SV=1	1	1	3	3	3	5.58768	2.37194	20.8328	12.5722	1.74613e-06	9.22005e-06	5.83885	1.90958e-14	3.44831e-15	2.75464e-14	WT - Control	limma	1.74613e-06	9.22005e-06	TRUE	enriched hit	5.58768
RPN2	P32565	26S proteasome regulatory subunit RPN2 OS=Saccharomyces cerevisiae (strain ATCC 204508 / S288c) GN=RPN2 PE=1 SV=4	1	1	3	3	6	6.09209	2.39124	23.0495	12.5692	1.74926e-06	9.22005e-06	5.83703	1.93179e-14	3.48334e-15	3.74759e-14	WT - Control	limma	1.74926e-06	9.22005e-06	TRUE	enriched hit	6.09209
RPS8A|RPS8B	P0CX39|P0CX40	40S ribosomal protein S8-A OS=Saccharomyces cerevisiae (strain ATCC 204508 / S288c) GN=RPS8A PE=1 SV=1|40S ribosomal protein S8-B OS=Saccharomyces cerevisiae (strain ATCC 204508 / S288c) GN=RPS8B PE=1 SV=1	1	1	3	3	8	7.55414	4.42975	25.6971	12.5411	1.77902e-06	9.27575e-06	5.81982	2.22045e-14	3.94899e-15	3.74759e-14	WT - Control	limma	1.77902e-06	9.27575e-06	TRUE	enriched hit	7.55414
GSP2	P32836	GTP-binding nuclear protein GSP2/CNR2 OS=Saccharomyces cerevisiae (strain ATCC 204508 / S288c) GN=GSP2 PE=1 SV=1	1	1	3	3	2	6.40286	5.04241	22.4014	12.5324	1.78837e-06	9.27575e-06	5.81448	2.30926e-14	4.08971e-15	3.74759e-14	WT - Control	limma	1.78837e-06	9.27575e-06	TRUE	enriched hit	6.40286
ADH3	P07246	Alcohol dehydrogenase 3, mitochondrial OS=Saccharomyces cerevisiae (strain ATCC 204508 / S288c) GN=ADH3 PE=1 SV=2	1	1	3	3	7	6.47823	2.83496	23.3813	12.5124	1.80992e-06	9.27575e-06	5.80226	2.53131e-14	4.4364e-15	3.74759e-14	WT - Control	limma	1.80992e-06	9.27575e-06	TRUE	enriched hit	6.47823
TFC1	P32367	Transcription factor tau 95 kDa subunit OS=Saccharomyces cerevisiae (strain ATCC 204508 / S288c) GN=TFC1 PE=1 SV=1	1	1	3	3	4	6.03762	3.72947	22.1001	12.5095	1.81309e-06	9.27575e-06	5.80047	2.57572e-14	4.50487e-15	3.74759e-14	WT - Control	limma	1.81309e-06	9.27575e-06	TRUE	enriched hit	6.03762
TFC8	Q12308	Transcription factor tau 60 kDa subunit OS=Saccharomyces cerevisiae (strain ATCC 204508 / S288c) GN=TFC8 PE=1 SV=1	1	1	3	3	3	5.90007	3.42208	21.7975	12.4921	1.83224e-06	9.27575e-06	5.78976	2.79776e-14	4.84304e-15	4.61242e-14	WT - Control	limma	1.83224e-06	9.27575e-06	TRUE	enriched hit	5.90007
RLI1	Q03195	Translation initiation factor RLI1 OS=Saccharomyces cerevisiae (strain ATCC 204508 / S288c) GN=RLI1 PE=1 SV=1	1	1	3	3	3	6.0558	2.61096	22.2256	12.4912	1.83315e-06	9.27575e-06	5.78925	2.79776e-14	4.84304e-15	4.61242e-14	WT - Control	limma	1.83315e-06	9.27575e-06	TRUE	enriched hit	6.0558
DOT5	P40553	Peroxiredoxin DOT5 OS=Saccharomyces cerevisiae (strain ATCC 204508 / S288c) GN=DOT5 PE=1 SV=1	1	1	3	3	5	6.42744	2.64954	23.1185	12.476	1.85011e-06	9.29851e-06	5.77985	2.9976e-14	5.15034e-15	4.61242e-14	WT - Control	limma	1.85011e-06	9.29851e-06	TRUE	enriched hit	6.42744
RPA135	P22138	DNA-directed RNA polymerase I subunit RPA135 OS=Saccharomyces cerevisiae (strain ATCC 204508 / S288c) GN=RPA135 PE=1 SV=1	1	1	3	3	2	5.88323	2.58764	21.0398	12.4555	1.87307e-06	9.29851e-06	5.76726	3.30846e-14	5.61938e-15	4.61242e-14	WT - Control	limma	1.87307e-06	9.29851e-06	TRUE	enriched hit	5.88323
REB1	P21538	DNA-binding protein REB1 OS=Saccharomyces cerevisiae (strain ATCC 204508 / S288c) GN=REB1 PE=1 SV=2	1	1	3	3	5	6.637	4.37432	22.9837	12.4543	1.8744e-06	9.29851e-06	5.76653	3.33067e-14	5.65247e-15	7.11081e-14	WT - Control	limma	1.8744e-06	9.29851e-06	TRUE	enriched hit	6.637
HOM6	P31116	Homoserine dehydrogenase OS=Saccharomyces cerevisiae (strain ATCC 204508 / S288c) GN=HOM6 PE=1 SV=1	1	1	3	3	3	6.08394	3.30575	22.4312	12.4338	1.89786e-06	9.35372e-06	5.75384	3.66374e-14	6.16868e-15	7.11081e-14	WT - Control	limma	1.89786e-06	9.35372e-06	TRUE	enriched hit	6.08394
PDE2	P06776	3',5'-cyclic-nucleotide phosphodiesterase 2 OS=Saccharomyces cerevisiae (strain ATCC 204508 / S288c) GN=PDE2 PE=1 SV=2	1	1	3	3	2	5.94746	2.92454	20.39	12.415	1.91951e-06	9.38486e-06	5.74225	3.9968e-14	6.67682e-15	7.11081e-14	WT - Control	limma	1.91951e-06	9.38486e-06	TRUE	enriched hit	5.94746
PUF3	Q07807	mRNA-binding protein PUF3 OS=Saccharomyces cerevisiae (strain ATCC 204508 / S288c) GN=PUF3 PE=1 SV=1	1	1	3	3	2	5.71591	3.32009	19.3918	12.407	1.9289e-06	9.38486e-06	5.73726	4.15223e-14	6.91123e-15	1.47213e-13	WT - Control	limma	1.9289e-06	9.38486e-06	TRUE	enriched hit	5.71591
CCT8	P47079	T-complex protein 1 subunit theta OS=Saccharomyces cerevisiae (strain ATCC 204508 / S288c) GN=CCT8 PE=1 SV=1	1	1	3	3	2	5.94489	2.59757	21.3885	12.3402	2.0087e-06	9.71086e-06	5.69583	5.68434e-14	9.30026e-15	1.47213e-13	WT - Control	limma	2.0087e-06	9.71086e-06	TRUE	enriched hit	5.94489
SHS1	Q07657	Seventh homolog of septin 1 OS=Saccharomyces cerevisiae (strain ATCC 204508 / S288c) GN=SHS1 PE=1 SV=1	1	1	3	3	2	5.76927	2.53398	21.3035	12.3173	2.03695e-06	9.7851e-06	5.68155	6.30607e-14	1.02467e-14	1.47213e-13	WT - Control	limma	2.03695e-06	9.7851e-06	TRUE	enriched hit	5.76927
ACS1	Q01574	Acetyl-coenzyme A synthetase 1 OS=Saccharomyces cerevisiae (strain ATCC 204508 / S288c) GN=ACS1 PE=1 SV=2	1	1	3	3	12	7.25762	2.3129	25.2769	12.2754	2.08978e-06	9.91704e-06	5.65536	7.66054e-14	1.22642e-14	1.47213e-13	WT - Control	limma	2.08978e-06	9.91704e-06	TRUE	enriched hit	7.25762
WRS1	Q12109	Tryptophan--tRNA ligase, cytoplasmic OS=Saccharomyces cerevisiae (strain ATCC 204508 / S288c) GN=WRS1 PE=1 SV=1	1	1	3	3	2	5.65444	3.49345	20.2628	12.2352	2.14201e-06	9.91704e-06	5.63009	9.23706e-14	1.45389e-14	1.47213e-13	WT - Control	limma	2.14201e-06	9.91704e-06	TRUE	enriched hit	5.65444
VPS5	Q92331	Vacuolar protein sorting-associated protein 5 OS=Saccharomyces cerevisiae (strain ATCC 204508 / S288c) GN=VPS5 PE=1 SV=1	1	1	3	3	3	5.82216	2.4167	21.7701	12.2265	2.15337e-06	9.91704e-06	5.62468	9.61453e-14	1.50722e-14	1.47213e-13	WT - Control	limma	2.15337e-06	9.91704e-06	TRUE	enriched hit	5.82216
IST2	P38250	Increased sodium tolerance protein 2 OS=Saccharomyces cerevisiae (strain ATCC 204508 / S288c) GN=IST2 PE=1 SV=2	1	1	3	3	3	6.08686	2.41081	21.6888	12.2225	2.15873e-06	9.91704e-06	5.62213	9.79217e-14	1.53217e-14	1.47213e-13	WT - Control	limma	2.15873e-06	9.91704e-06	TRUE	enriched hit	6.08686
MET17	P06106	Homocysteine/cysteine synthase OS=Saccharomyces cerevisiae (strain ATCC 204508 / S288c) GN=MET17 PE=1 SV=3	1	1	3	3	2	5.71746	2.64309	19.6059	12.209	2.17671e-06	9.91704e-06	5.61364	1.04139e-13	1.61875e-14	1.47213e-13	WT - Control	limma	2.17671e-06	9.91704e-06	TRUE	enriched hit	5.71746
TFC3	P34111	Transcription factor tau 138 kDa subunit OS=Saccharomyces cerevisiae (strain ATCC 204508 / S288c) GN=TFC3 PE=1 SV=1	1	1	3	3	15	6.63706	2.69474	24.4934	12.2048	2.18229e-06	9.91704e-06	5.61102	1.06137e-13	1.64634e-14	1.47213e-13	WT - Control	limma	2.18229e-06	9.91704e-06	TRUE	enriched hit	6.63706
GET4	Q12125	Golgi to ER traffic protein 4 OS=Saccharomyces cerevisiae (strain ATCC 204508 / S288c) GN=GET4 PE=1 SV=1	1	1	3	3	4	6.66268	3.03164	23.0721	12.2022	2.18584e-06	9.91704e-06	5.60935	1.0747e-13	1.66467e-14	1.47213e-13	WT - Control	limma	2.18584e-06	9.91704e-06	TRUE	enriched hit	6.66268
SEC24	P40482	Protein transport protein SEC24 OS=Saccharomyces cerevisiae (strain ATCC 204508 / S288c) GN=SEC24 PE=1 SV=1	1	1	3	3	3	5.72604	3.02722	21.0517	12.2003	2.18833e-06	9.91704e-06	5.60818	1.08358e-13	1.67686e-14	1.47213e-13	WT - Control	limma	2.18833e-06	9.91704e-06	TRUE	enriched hit	5.72604
GTS1	P40956	Protein GTS1 OS=Saccharomyces cerevisiae (strain ATCC 204508 / S288c) GN=GTS1 PE=1 SV=2	1	1	3	3	2	5.64607	2.45263	20.9076	12.188	2.20499e-06	9.91704e-06	5.60042	1.14797e-13	1.76456e-14	1.47213e-13	WT - Control	limma	2.20499e-06	9.91704e-06	TRUE	enriched hit	5.64607
SUB1	P54000	RNA polymerase II transcriptional coactivator SUB1 OS=Saccharomyces cerevisiae (strain ATCC 204508 / S288c) GN=SUB1 PE=1 SV=1	1	1	3	3	5	6.50128	3.70881	21.8463	12.1878	2.20532e-06	9.91704e-06	5.60026	1.15019e-13	1.76757e-14	1.47213e-13	WT - Control	limma	2.20532e-06	9.91704e-06	TRUE	enriched hit	6.50128
RSC2	Q06488	Chromatin structure-remodeling complex subunit RSC2 OS=Saccharomyces cerevisiae (strain ATCC 204508 / S288c) GN=RSC2 PE=1 SV=1	1	1	3	3	2	6.04496	3.09042	20.545	12.1694	2.23046e-06	9.91704e-06	5.58865	1.25011e-13	1.90129e-14	1.47213e-13	WT - Control	limma	2.23046e-06	9.91704e-06	TRUE	enriched hit	6.04496
SCS2	P40075	Vesicle-associated membrane protein-associated protein SCS2 OS=Saccharomyces cerevisiae (strain ATCC 204508 / S288c) GN=SCS2 PE=1 SV=3	1	1	3	3	4	5.86934	2.23883	21.8923	12.1688	2.23131e-06	9.91704e-06	5.58826	1.25455e-13	1.90717e-14	1.47213e-13	WT - Control	limma	2.23131e-06	9.91704e-06	TRUE	enriched hit	5.86934
HRR25	P29295	Casein kinase I homolog HRR25 OS=Saccharomyces cerevisiae (strain ATCC 204508 / S288c) GN=HRR25 PE=1 SV=1	1	1	3	3	4	6.54618	2.57802	23.2326	12.1666	2.23427e-06	9.91704e-06	5.5869	1.26565e-13	1.92184e-14	2.75304e-13	WT - Control	limma	2.23427e-06	9.91704e-06	TRUE	enriched hit	6.54618
ADE13	Q05911	Adenylosuccinate lyase OS=Saccharomyces cerevisiae (strain ATCC 204508 / S288c) GN=ADE13 PE=1 SV=1	1	1	3	3	7	6.2105	2.41572	23.4416	12.1393	2.2723e-06	1.00177e-05	5.5696	1.43663e-13	2.16108e-14	2.75304e-13	WT - Control	limma	2.2723e-06	1.00177e-05	TRUE	enriched hit	6.2105
RPG1	P38249	Eukaryotic translation initiation factor 3 subunit A OS=Saccharomyces cerevisiae (strain ATCC 204508 / S288c) GN=RPG1 PE=1 SV=1	1	1	3	3	9	6.4048	2.26242	24.105	12.1315	2.28334e-06	1.00177e-05	5.56463	1.4877e-13	2.23167e-14	2.75304e-13	WT - Control	limma	2.28334e-06	1.00177e-05	TRUE	enriched hit	6.4048
YNL181W	P53878	Uncharacterized oxidoreductase YNL181W OS=Saccharomyces cerevisiae (strain ATCC 204508 / S288c) GN=YNL181W PE=1 SV=2	1	1	3	3	2	6.4275	2.30704	20.5566	12.112	2.31103e-06	1.00754e-05	5.55228	1.62759e-13	2.42305e-14	2.75304e-13	WT - Control	limma	2.31103e-06	1.00754e-05	TRUE	enriched hit	6.4275
MRPL17	P36528	54S ribosomal protein L17, mitochondrial OS=Saccharomyces cerevisiae (strain ATCC 204508 / S288c) GN=MRPL17 PE=1 SV=2	1	1	3	3	4	6.20612	2.39599	22.2661	12.1036	2.32305e-06	1.00754e-05	5.54695	1.68976e-13	2.50718e-14	4.91991e-13	WT - Control	limma	2.32305e-06	1.00754e-05	TRUE	enriched hit	6.20612
ALD4	P46367	Potassium-activated aldehyde dehydrogenase, mitochondrial OS=Saccharomyces cerevisiae (strain ATCC 204508 / S288c) GN=ALD4 PE=1 SV=2	1	1	3	3	8	7.36024	2.87467	24.2295	12.0592	2.38809e-06	1.02972e-05	5.51863	2.06946e-13	3.03579e-14	4.91991e-13	WT - Control	limma	2.38809e-06	1.02972e-05	TRUE	enriched hit	7.36024
DBP2	P24783	ATP-dependent RNA helicase DBP2 OS=Saccharomyces cerevisiae (strain ATCC 204508 / S288c) GN=DBP2 PE=1 SV=1	1	1	3	3	4	6.1912	2.31243	22.0071	12.0503	2.40131e-06	1.02972e-05	5.51297	2.15605e-13	3.15468e-14	4.91991e-13	WT - Control	limma	2.40131e-06	1.02972e-05	TRUE	enriched hit	6.1912
SAS3	P34218	Histone acetyltransferase SAS3 OS=Saccharomyces cerevisiae (strain ATCC 204508 / S288c) GN=SAS3 PE=1 SV=1	1	1	3	3	7	6.98906	4.59884	22.3712	12.04	2.41677e-06	1.03052e-05	5.50638	2.25819e-13	3.29412e-14	5.87507e-13	WT - Control	limma	2.41677e-06	1.03052e-05	TRUE	enriched hit	6.98906
ABF1	P14164	ARS-binding factor 1 OS=Saccharomyces cerevisiae (strain ATCC 204508 / S288c) GN=ABF1 PE=1 SV=4	1	1	3	3	7	6.64329	2.46053	23.6421	11.9774	2.51311e-06	1.06561e-05	5.46625	2.99982e-13	4.29684e-14	5.87507e-13	WT - Control	limma	2.51311e-06	1.06561e-05	TRUE	enriched hit	6.64329
HSC82	P15108	ATP-dependent molecular chaperone HSC82 OS=Saccharomyces cerevisiae (strain ATCC 204508 / S288c) GN=HSC82 PE=1 SV=4	1	1	3	3	3	6.67248	2.32335	23.4554	11.9607	2.53941e-06	1.06685e-05	5.45555	3.23519e-13	4.60754e-14	5.87507e-13	WT - Control	limma	2.53941e-06	1.06685e-05	TRUE	enriched hit	6.67248
UBP3	Q01477	Ubiquitin carboxyl-terminal hydrolase 3 OS=Saccharomyces cerevisiae (strain ATCC 204508 / S288c) GN=UBP3 PE=1 SV=1	1	1	3	3	3	5.63702	3.09532	21.3575	11.9578	2.54413e-06	1.06685e-05	5.45365	3.27738e-13	4.66285e-14	5.87507e-13	WT - Control	limma	2.54413e-06	1.06685e-05	TRUE	enriched hit	5.63702
MLH1	P38920	DNA mismatch repair protein MLH1 OS=Saccharomyces cerevisiae (strain ATCC 204508 / S288c) GN=MLH1 PE=1 SV=2	1	1	3	3	2	5.40663	2.6858	19.8646	11.9465	7.63966e-06	1.85521e-05	4.4902	3.44835e-13	4.88587e-14	5.87507e-13	WT - Control	limma	7.63966e-06	1.85521e-05	TRUE	enriched hit	5.40663
AGX1	P43567	Alanine--glyoxylate aminotransferase 1 OS=Saccharomyces cerevisiae (strain ATCC 204508 / S288c) GN=AGX1 PE=1 SV=1	1	1	3	3	2	6.22012	2.33012	20.5589	11.9403	2.5721e-06	1.07265e-05	5.44241	3.54605e-13	5.01249e-14	5.87507e-13	WT - Control	limma	2.5721e-06	1.07265e-05	TRUE	enriched hit	6.22012
HTB2	P02294	Histone H2B.2 OS=Saccharomyces cerevisiae (strain ATCC 204508 / S288c) GN=HTB2 PE=1 SV=2	1	1	3	3	2	7.46246	5.15046	24.6957	11.914	2.615e-06	1.07997e-05	5.42541	3.99236e-13	5.58341e-14	5.87507e-13	WT - Control	limma	2.615e-06	1.07997e-05	TRUE	enriched hit	7.46246
PYC1	P11154	Pyruvate carboxylase 1 OS=Saccharomyces cerevisiae (strain ATCC 204508 / S288c) GN=PYC1 PE=1 SV=2	1	1	3	3	12	6.64887	2.21152	24.0945	11.9093	2.62275e-06	1.07997e-05	5.42237	4.07896e-13	5.69279e-14	5.87507e-13	WT - Control	limma	2.62275e-06	1.07997e-05	TRUE	enriched hit	6.64887
FUN12	P39730	Eukaryotic translation initiation factor 5B OS=Saccharomyces cerevisiae (strain ATCC 204508 / S288c) GN=FUN12 PE=1 SV=2	1	1	3	3	9	6.71847	3.02343	24.162	11.9034	2.63248e-06	1.07997e-05	5.41856	4.18776e-13	5.82957e-14	5.87507e-13	WT - Control	limma	2.63248e-06	1.07997e-05	TRUE	enriched hit	6.71847
TMA64	Q04600	Translation machinery-associated protein 64 OS=Saccharomyces cerevisiae (strain ATCC 204508 / S288c) GN=TMA64 PE=1 SV=1	1	1	3	3	3	5.88874	2.34705	22.1006	11.8936	2.64879e-06	1.07997e-05	5.41221	4.3765e-13	6.06518e-14	5.87507e-13	WT - Control	limma	2.64879e-06	1.07997e-05	TRUE	enriched hit	5.88874
ALA1	P40825|P40825-2	Alanine--tRNA ligase, mitochondrial OS=Saccharomyces cerevisiae (strain ATCC 204508 / S288c) GN=ALA1 PE=1 SV=3|Isoform Cytoplasmic of Alanine--tRNA ligase, mitochondrial OS=Saccharomyces cerevisiae (strain ATCC 204508 / S288c) GN=ALA1	1	1	3	3	7	6.03919	2.35412	22.8757	11.8864	2.66079e-06	1.07997e-05	5.40756	4.52083e-13	6.24394e-14	1.21268e-12	WT - Control	limma	2.66079e-06	1.07997e-05	TRUE	enriched hit	6.03919
PFK1	P16861	ATP-dependent 6-phosphofructokinase subunit alpha OS=Saccharomyces cerevisiae (strain ATCC 204508 / S288c) GN=PFK1 PE=1 SV=1	1	1	3	3	5	6.39142	2.48943	22.8923	11.7825	2.84166e-06	1.1429e-05	5.3399	7.19425e-13	9.64272e-14	1.21268e-12	WT - Control	limma	2.84166e-06	1.1429e-05	TRUE	enriched hit	6.39142
LSC1	P53598	Succinyl-CoA ligase [ADP-forming] subunit alpha, mitochondrial OS=Saccharomyces cerevisiae (strain ATCC 204508 / S288c) GN=LSC1 PE=1 SV=1	1	1	3	3	2	6.3732	2.21571	22.3771	11.7581	2.88609e-06	1.1429e-05	5.32392	8.02025e-13	1.06526e-13	1.21268e-12	WT - Control	limma	2.88609e-06	1.1429e-05	TRUE	enriched hit	6.3732
RPB2	P08518	DNA-directed RNA polymerase II subunit RPB2 OS=Saccharomyces cerevisiae (strain ATCC 204508 / S288c) GN=RPB2 PE=1 SV=2	1	1	3	3	20	7.18273	3.47918	25.4042	11.7557	2.89044e-06	1.1429e-05	5.32237	8.10463e-13	1.07547e-13	1.21268e-12	WT - Control	limma	2.89044e-06	1.1429e-05	TRUE	enriched hit	7.18273
ADE2	P21264	Phosphoribosylaminoimidazole carboxylase OS=Saccharomyces cerevisiae (strain ATCC 204508 / S288c) GN=ADE2 PE=1 SV=1	1	1	3	3	2	6.1007	2.60087	21.6908	11.7552	2.89133e-06	1.1429e-05	5.32206	8.12239e-13	1.07762e-13	1.21268e-12	WT - Control	limma	2.89133e-06	1.1429e-05	TRUE	enriched hit	6.1007
DHH1	P39517	ATP-dependent RNA helicase DHH1 OS=Saccharomyces cerevisiae (strain ATCC 204508 / S288c) GN=DHH1 PE=1 SV=1	1	1	3	3	2	6.18146	3.06117	21.0563	11.747	2.90658e-06	1.1429e-05	5.31664	8.42437e-13	1.114e-13	1.21268e-12	WT - Control	limma	2.90658e-06	1.1429e-05	TRUE	enriched hit	6.18146
PGM2	P37012	Phosphoglucomutase 2 OS=Saccharomyces cerevisiae (strain ATCC 204508 / S288c) GN=PGM2 PE=1 SV=1	1	1	3	3	8	6.31261	2.21291	23.6459	11.7425	2.91483e-06	1.1429e-05	5.31372	8.59313e-13	1.13423e-13	1.21268e-12	WT - Control	limma	2.91483e-06	1.1429e-05	TRUE	enriched hit	6.31261
RPB8	P20436	DNA-directed RNA polymerases I, II, and III subunit RPABC3 OS=Saccharomyces cerevisiae (strain ATCC 204508 / S288c) GN=RPB8 PE=1 SV=1	1	1	3	3	3	6.18971	3.61824	22.5211	11.7179	2.96098e-06	1.1429e-05	5.29753	9.58345e-13	1.25146e-13	1.21268e-12	WT - Control	limma	2.96098e-06	1.1429e-05	TRUE	enriched hit	6.18971
LSB3	P43603	LAS seventeen-binding protein 3 OS=Saccharomyces cerevisiae (strain ATCC 204508 / S288c) GN=LSB3 PE=1 SV=3	1	1	3	3	3	6.32255	4.31214	20.5276	11.7177	2.96138e-06	1.1429e-05	5.2974	9.59233e-13	1.2525e-13	1.21268e-12	WT - Control	limma	2.96138e-06	1.1429e-05	TRUE	enriched hit	6.32255
RPS30A|RPS30B	P0CX33|P0CX34	40S ribosomal protein S30-A OS=Saccharomyces cerevisiae (strain ATCC 204508 / S288c) GN=RPS30A PE=1 SV=1|40S ribosomal protein S30-B OS=Saccharomyces cerevisiae (strain ATCC 204508 / S288c) GN=RPS30B PE=1 SV=1	1	1	3	3	2	6.3901	3.10025	21.1103	11.7127	2.97077e-06	1.1429e-05	5.29413	9.80549e-13	1.2774e-13	1.21268e-12	WT - Control	limma	2.97077e-06	1.1429e-05	TRUE	enriched hit	6.3901
ACC1	Q00955	Acetyl-CoA carboxylase OS=Saccharomyces cerevisiae (strain ATCC 204508 / S288c) GN=ACC1 PE=1 SV=2	1	1	3	3	5	6.06967	2.52897	22.6161	11.7058	2.98393e-06	1.1429e-05	5.28958	1.01119e-12	1.313e-13	1.21268e-12	WT - Control	limma	2.98393e-06	1.1429e-05	TRUE	enriched hit	6.06967
RPB3	P16370	DNA-directed RNA polymerase II subunit RPB3 OS=Saccharomyces cerevisiae (strain ATCC 204508 / S288c) GN=RPB3 PE=1 SV=2	1	1	3	3	2	6.14357	3.40228	21.8672	11.6731	3.04708e-06	1.1429e-05	5.26799	1.1684e-12	1.49201e-13	1.21268e-12	WT - Control	limma	3.04708e-06	1.1429e-05	TRUE	enriched hit	6.14357
SEC23	P15303	Protein transport protein SEC23 OS=Saccharomyces cerevisiae (strain ATCC 204508 / S288c) GN=SEC23 PE=1 SV=1	1	1	3	3	4	6.17047	2.22255	22.4979	11.6727	3.04786e-06	1.1429e-05	5.26773	1.1704e-12	1.49425e-13	1.21268e-12	WT - Control	limma	3.04786e-06	1.1429e-05	TRUE	enriched hit	6.17047
SMC4	Q12267	Structural maintenance of chromosomes protein 4 OS=Saccharomyces cerevisiae (strain ATCC 204508 / S288c) GN=SMC4 PE=1 SV=1	1	1	3	3	8	6.18063	2.17501	23.42	11.6718	3.04951e-06	1.1429e-05	5.26717	1.17484e-12	1.49922e-13	1.21268e-12	WT - Control	limma	3.04951e-06	1.1429e-05	TRUE	enriched hit	6.18063
FRA1	Q07825	Putative Xaa-Pro aminopeptidase FRA1 OS=Saccharomyces cerevisiae (strain ATCC 204508 / S288c) GN=FRA1 PE=1 SV=1	1	1	3	3	4	6.39722	2.25344	22.9488	11.6503	3.09192e-06	1.1429e-05	5.25293	1.29186e-12	1.62849e-13	1.21268e-12	WT - Control	limma	3.09192e-06	1.1429e-05	TRUE	enriched hit	6.39722
ETR1	P38071	Enoyl-[acyl-carrier protein] reductase [NADPH, B-specific], mitochondrial OS=Saccharomyces cerevisiae (strain ATCC 204508 / S288c) GN=ETR1 PE=1 SV=3	1	1	3	3	2	5.92873	2.29604	21.4743	11.6497	3.09298e-06	1.1429e-05	5.25258	1.29496e-12	1.63188e-13	1.21268e-12	WT - Control	limma	3.09298e-06	1.1429e-05	TRUE	enriched hit	5.92873
YHR097C	P38809	Uncharacterized protein YHR097C OS=Saccharomyces cerevisiae (strain ATCC 204508 / S288c) GN=YHR097C PE=1 SV=1	1	1	3	3	3	5.85733	2.59102	21.5816	11.641	3.11046e-06	1.1429e-05	5.24676	1.34603e-12	1.68728e-13	1.21268e-12	WT - Control	limma	3.11046e-06	1.1429e-05	TRUE	enriched hit	5.85733
OLA1	P38219	Obg-like ATPase 1 OS=Saccharomyces cerevisiae (strain ATCC 204508 / S288c) GN=OLA1 PE=1 SV=1	1	1	3	3	2	6.29566	2.27849	21.4372	11.6397	3.11293e-06	1.1429e-05	5.24594	1.35336e-12	1.69519e-13	1.21268e-12	WT - Control	limma	3.11293e-06	1.1429e-05	TRUE	enriched hit	6.29566
KGD2	P19262	Dihydrolipoyllysine-residue succinyltransferase component of 2-oxoglutarate dehydrogenase complex, mitochondrial OS=Saccharomyces cerevisiae (strain ATCC 204508 / S288c) GN=KGD2 PE=1 SV=2	1	1	3	3	4	6.68602	2.5946	22.5216	11.6387	3.115e-06	1.1429e-05	5.24526	1.35958e-12	1.70188e-13	1.21268e-12	WT - Control	limma	3.115e-06	1.1429e-05	TRUE	enriched hit	6.68602
YNG1	Q08465	Protein YNG1 OS=Saccharomyces cerevisiae (strain ATCC 204508 / S288c) GN=YNG1 PE=1 SV=1	1	1	3	3	4	5.93867	4.16249	22.0808	11.6364	3.11951e-06	1.1429e-05	5.24377	1.37312e-12	1.71644e-13	1.21268e-12	WT - Control	limma	3.11951e-06	1.1429e-05	TRUE	enriched hit	5.93867
DPS1	P04802	Aspartate--tRNA ligase, cytoplasmic OS=Saccharomyces cerevisiae (strain ATCC 204508 / S288c) GN=DPS1 PE=1 SV=3	1	1	3	3	23	7.08746	2.93503	24.9668	11.6277	3.13708e-06	1.1429e-05	5.23797	1.42686e-12	1.77378e-13	1.21268e-12	WT - Control	limma	3.13708e-06	1.1429e-05	TRUE	enriched hit	7.08746
NOG1	Q02892	Nucleolar GTP-binding protein 1 OS=Saccharomyces cerevisiae (strain ATCC 204508 / S288c) GN=NOG1 PE=1 SV=1	1	1	3	3	5	6.41551	2.44342	23.3348	11.626	3.14053e-06	1.1429e-05	5.23684	1.43752e-12	1.78508e-13	1.21268e-12	WT - Control	limma	3.14053e-06	1.1429e-05	TRUE	enriched hit	6.41551
VPS33	P20795	Vacuolar protein sorting-associated protein 33 OS=Saccharomyces cerevisiae (strain ATCC 204508 / S288c) GN=VPS33 PE=1 SV=1	1	1	3	3	2	5.59498	2.38214	20.875	11.6157	3.16141e-06	1.1429e-05	5.23001	1.50413e-12	1.85514e-13	1.21268e-12	WT - Control	limma	3.16141e-06	1.1429e-05	TRUE	enriched hit	5.59498
VMA2	P16140	V-type proton ATPase subunit B OS=Saccharomyces cerevisiae (strain ATCC 204508 / S288c) GN=VMA2 PE=1 SV=2	1	1	3	3	6	6.62243	2.69255	22.9143	11.6003	3.19293e-06	1.1429e-05	5.21977	1.60938e-12	1.96393e-13	1.21268e-12	WT - Control	limma	3.19293e-06	1.1429e-05	TRUE	enriched hit	6.62243
KNS1	P32350	Dual specificity protein kinase KNS1 OS=Saccharomyces cerevisiae (strain ATCC 204508 / S288c) GN=KNS1 PE=1 SV=2	1	1	3	3	5	5.84177	2.28382	22.1902	11.5987	3.19611e-06	1.1429e-05	5.21874	1.62026e-12	1.97505e-13	1.21268e-12	WT - Control	limma	3.19611e-06	1.1429e-05	TRUE	enriched hit	5.84177
RPS11A|RPS11B	P0CX47|P0CX48	40S ribosomal protein S11-A OS=Saccharomyces cerevisiae (strain ATCC 204508 / S288c) GN=RPS11A PE=1 SV=1|40S ribosomal protein S11-B OS=Saccharomyces cerevisiae (strain ATCC 204508 / S288c) GN=RPS11B PE=1 SV=1	1	1	3	3	6	7.3704	2.69436	25.2036	11.5892	3.21585e-06	1.1429e-05	5.21239	1.68954e-12	2.04525e-13	1.21268e-12	WT - Control	limma	3.21585e-06	1.1429e-05	TRUE	enriched hit	7.3704
HOP1	P20050	Meiosis-specific protein HOP1 OS=Saccharomyces cerevisiae (strain ATCC 204508 / S288c) GN=HOP1 PE=1 SV=2	1	1	3	3	12	8.04328	3.49517	25.7927	11.5885	3.21733e-06	1.1429e-05	5.21191	1.69487e-12	2.05061e-13	1.21268e-12	WT - Control	limma	3.21733e-06	1.1429e-05	TRUE	enriched hit	8.04328
YEL020C	P39994	Putative 2-hydroxyacyl-CoA lyase OS=Saccharomyces cerevisiae (strain ATCC 204508 / S288c) GN=YEL020C PE=1 SV=1	1	1	3	3	2	6.28719	2.66384	21.5307	11.586	3.22239e-06	1.1429e-05	5.21029	1.71307e-12	2.06888e-13	2.01793e-12	WT - Control	limma	3.22239e-06	1.1429e-05	TRUE	enriched hit	6.28719
MSH6	Q03834	DNA mismatch repair protein MSH6 OS=Saccharomyces cerevisiae (strain ATCC 204508 / S288c) GN=MSH6 PE=1 SV=1	1	1	3	3	5	6.20984	4.05506	21.8216	11.5752	3.24503e-06	1.14557e-05	5.20307	1.79634e-12	2.15869e-13	2.01793e-12	WT - Control	limma	3.24503e-06	1.14557e-05	TRUE	enriched hit	6.20984
MSH1	P25846	DNA mismatch repair protein MSH1, mitochondrial OS=Saccharomyces cerevisiae (strain ATCC 204508 / S288c) GN=MSH1 PE=1 SV=2	1	1	3	3	2	5.46902	2.90767	20.0916	11.5598	3.27742e-06	1.15165e-05	5.19281	1.92135e-12	2.29185e-13	2.01793e-12	WT - Control	limma	3.27742e-06	1.15165e-05	TRUE	enriched hit	5.46902
TYS1	P36421	Tyrosine--tRNA ligase, cytoplasmic OS=Saccharomyces cerevisiae (strain ATCC 204508 / S288c) GN=TYS1 PE=1 SV=3	1	1	3	3	4	6.18187	2.63836	21.7062	11.546	3.30686e-06	1.15384e-05	5.18358	2.04103e-12	2.41751e-13	2.01793e-12	WT - Control	limma	3.30686e-06	1.15384e-05	TRUE	enriched hit	6.18187
FUM1	P08417	Fumarate hydratase, mitochondrial OS=Saccharomyces cerevisiae (strain ATCC 204508 / S288c) GN=FUM1 PE=1 SV=2	1	1	3	3	5	6.08979	2.29275	22.1986	11.539	3.32187e-06	1.15384e-05	5.17891	2.10432e-12	2.48324e-13	2.01793e-12	WT - Control	limma	3.32187e-06	1.15384e-05	TRUE	enriched hit	6.08979
YCS4	Q06156	Condensin complex subunit 1 OS=Saccharomyces cerevisiae (strain ATCC 204508 / S288c) GN=YCS4 PE=1 SV=1	1	1	3	3	4	5.62956	3.04941	21.7708	11.5346	3.33125e-06	1.15384e-05	5.17599	2.14473e-12	2.52496e-13	2.01793e-12	WT - Control	limma	3.33125e-06	1.15384e-05	TRUE	enriched hit	5.62956
PRP43	P53131	Pre-mRNA-splicing factor ATP-dependent RNA helicase PRP43 OS=Saccharomyces cerevisiae (strain ATCC 204508 / S288c) GN=PRP43 PE=1 SV=1	1	1	3	3	5	6.35077	2.96866	22.3249	11.5257	3.3506e-06	1.15384e-05	5.17001	2.22999e-12	2.61235e-13	2.01793e-12	WT - Control	limma	3.3506e-06	1.15384e-05	TRUE	enriched hit	6.35077
NHP2	P32495	H/ACA ribonucleoprotein complex subunit 2 OS=Saccharomyces cerevisiae (strain ATCC 204508 / S288c) GN=NHP2 PE=1 SV=2	1	1	3	3	3	6.37317	3.18187	22.8854	11.517	3.36952e-06	1.15384e-05	5.1642	2.31615e-12	2.69977e-13	2.01793e-12	WT - Control	limma	3.36952e-06	1.15384e-05	TRUE	enriched hit	6.37317
MLS1	P30952	Malate synthase 1, glyoxysomal OS=Saccharomyces cerevisiae (strain ATCC 204508 / S288c) GN=MLS1 PE=1 SV=1	1	1	3	3	9	7.18432	2.06346	25.4652	11.5128	3.37876e-06	1.15384e-05	5.16137	2.359e-12	2.74294e-13	2.01793e-12	WT - Control	limma	3.37876e-06	1.15384e-05	TRUE	enriched hit	7.18432
LSC2	P53312	Succinyl-CoA ligase [ADP-forming] subunit beta, mitochondrial OS=Saccharomyces cerevisiae (strain ATCC 204508 / S288c) GN=LSC2 PE=1 SV=1	1	1	3	3	5	6.10069	2.17066	22.4139	11.5076	3.39007e-06	1.15384e-05	5.15792	2.41251e-12	2.79654e-13	2.61851e-12	WT - Control	limma	3.39007e-06	1.15384e-05	TRUE	enriched hit	6.10069
CMR1	Q12510	DNA damage-binding protein CMR1 OS=Saccharomyces cerevisiae (strain ATCC 204508 / S288c) GN=CMR1 PE=1 SV=1	1	1	3	3	6	6.63331	4.59281	22.7304	11.4896	3.42989e-06	1.1619e-05	5.14585	2.6088e-12	2.99802e-13	2.61851e-12	WT - Control	limma	3.42989e-06	1.1619e-05	TRUE	enriched hit	6.63331
SPF1	P39986	Manganese-transporting ATPase 1 OS=Saccharomyces cerevisiae (strain ATCC 204508 / S288c) GN=SPF1 PE=1 SV=1	1	1	3	3	2	5.99997	2.34732	21.0334	11.4797	3.45208e-06	1.1619e-05	5.13919	2.7236e-12	3.11425e-13	2.61851e-12	WT - Control	limma	3.45208e-06	1.1619e-05	TRUE	enriched hit	5.99997
YCG1	Q06680	Condensin complex subunit 3 OS=Saccharomyces cerevisiae (strain ATCC 204508 / S288c) GN=YCG1 PE=1 SV=2	1	1	3	3	3	5.77449	2.45007	21.1529	11.4762	3.45986e-06	1.1619e-05	5.13686	2.7649e-12	3.15578e-13	2.61851e-12	WT - Control	limma	3.45986e-06	1.1619e-05	TRUE	enriched hit	5.77449
NOP56	Q12460	Nucleolar protein 56 OS=Saccharomyces cerevisiae (strain ATCC 204508 / S288c) GN=NOP56 PE=1 SV=1	1	1	3	3	7	6.95893	2.83065	23.6269	11.4684	3.47756e-06	1.1619e-05	5.13159	2.8606e-12	3.25145e-13	2.61851e-12	WT - Control	limma	3.47756e-06	1.1619e-05	TRUE	enriched hit	6.95893
RPO21	P04050	DNA-directed RNA polymerase II subunit RPB1 OS=Saccharomyces cerevisiae (strain ATCC 204508 / S288c) GN=RPO21 PE=1 SV=2	1	1	3	3	29	7.23095	4.17885	25.8456	11.4588	3.4994e-06	1.1619e-05	5.12512	2.9825e-12	3.37216e-13	2.61851e-12	WT - Control	limma	3.4994e-06	1.1619e-05	TRUE	enriched hit	7.23095
MRPS28	P21771	37S ribosomal protein S28, mitochondrial OS=Saccharomyces cerevisiae (strain ATCC 204508 / S288c) GN=MRPS28 PE=1 SV=1	1	1	3	3	3	6.52391	3.28813	22.8016	11.4561	3.50559e-06	1.1619e-05	5.12329	3.01759e-12	3.40667e-13	4.85601e-12	WT - Control	limma	3.50559e-06	1.1619e-05	TRUE	enriched hit	6.52391
SWC3	P31376	SWR1-complex protein 3 OS=Saccharomyces cerevisiae (strain ATCC 204508 / S288c) GN=SWC3 PE=1 SV=2	1	1	3	3	5	6.2331	3.39577	22.5817	11.4353	3.55331e-06	1.17259e-05	5.10932	3.30114e-12	3.70238e-13	4.85601e-12	WT - Control	limma	3.55331e-06	1.17259e-05	TRUE	enriched hit	6.2331
IOC2	Q12072	ISWI one complex protein 2 OS=Saccharomyces cerevisiae (strain ATCC 204508 / S288c) GN=IOC2 PE=1 SV=1	1	1	3	3	6	6.36333	3.47017	23.3243	11.4228	3.58258e-06	1.17713e-05	5.10084	3.48543e-12	3.89251e-13	4.85601e-12	WT - Control	limma	3.58258e-06	1.17713e-05	TRUE	enriched hit	6.36333
MSS116	P15424	ATP-dependent RNA helicase MSS116, mitochondrial OS=Saccharomyces cerevisiae (strain ATCC 204508 / S288c) GN=MSS116 PE=1 SV=1	1	1	3	3	14	7.34274	3.39096	24.708	11.4136	3.60411e-06	1.1791e-05	5.09464	3.62621e-12	4.03665e-13	4.85601e-12	WT - Control	limma	3.60411e-06	1.1791e-05	TRUE	enriched hit	7.34274
BRE1	Q07457	E3 ubiquitin-protein ligase BRE1 OS=Saccharomyces cerevisiae (strain ATCC 204508 / S288c) GN=BRE1 PE=1 SV=1	1	1	3	3	12	6.25453	2.34244	23.9813	11.4049	3.62478e-06	1.18077e-05	5.08873	3.76565e-12	4.17852e-13	6.18902e-12	WT - Control	limma	3.62478e-06	1.18077e-05	TRUE	enriched hit	6.25453
RPL1A|RPL1B	P0CX43|P0CX44	60S ribosomal protein L1-A OS=Saccharomyces cerevisiae (strain ATCC 204508 / S288c) GN=RPL1A PE=1 SV=1|60S ribosomal protein L1-B OS=Saccharomyces cerevisiae (strain ATCC 204508 / S288c) GN=RPL1B PE=1 SV=1	1	1	3	3	4	7.67413	3.89367	24.1606	11.3543	3.7468e-06	1.21531e-05	5.05448	4.68048e-12	5.10984e-13	6.18902e-12	WT - Control	limma	3.7468e-06	1.21531e-05	TRUE	enriched hit	7.67413
CAM1	P29547	Elongation factor 1-gamma 1 OS=Saccharomyces cerevisiae (strain ATCC 204508 / S288c) GN=CAM1 PE=1 SV=2	1	1	3	3	2	5.89286	2.29287	21.0349	11.3262	3.81681e-06	1.22113e-05	5.03531	5.28178e-12	5.70578e-13	6.18902e-12	WT - Control	limma	3.81681e-06	1.22113e-05	TRUE	enriched hit	5.89286
RPT6	Q01939	26S protease regulatory subunit 8 homolog OS=Saccharomyces cerevisiae (strain ATCC 204508 / S288c) GN=RPT6 PE=1 SV=4	1	1	3	3	4	5.99406	2.19546	22.0467	11.3166	3.84099e-06	1.22113e-05	5.02878	5.50315e-12	5.92204e-13	6.18902e-12	WT - Control	limma	3.84099e-06	1.22113e-05	TRUE	enriched hit	5.99406
RRN5	Q02983	RNA polymerase I-specific transcription initiation factor RRN5 OS=Saccharomyces cerevisiae (strain ATCC 204508 / S288c) GN=RRN5 PE=1 SV=1	1	1	3	3	2	6.22381	2.56696	21.0876	11.3106	3.85615e-06	1.22113e-05	5.0247	5.64593e-12	6.06064e-13	6.18902e-12	WT - Control	limma	3.85615e-06	1.22113e-05	TRUE	enriched hit	6.22381
LAP3	Q01532|Q01532-2	Cysteine proteinase 1, mitochondrial OS=Saccharomyces cerevisiae (strain ATCC 204508 / S288c) GN=LAP3 PE=1 SV=3|Isoform Cytoplasmic of Cysteine proteinase 1, mitochondrial OS=Saccharomyces cerevisiae (strain ATCC 204508 / S288c) GN=LAP3	1	1	3	3	3	5.99191	2.5928	21.3396	11.3098	3.85832e-06	1.22113e-05	5.02412	5.66658e-12	6.08063e-13	6.18902e-12	WT - Control	limma	3.85832e-06	1.22113e-05	TRUE	enriched hit	5.99191
MRPS35	P53292	37S ribosomal protein S35, mitochondrial OS=Saccharomyces cerevisiae (strain ATCC 204508 / S288c) GN=MRPS35 PE=1 SV=1	1	1	3	3	2	5.71274	2.07422	20.175	11.308	3.86291e-06	1.22113e-05	5.02288	5.71054e-12	6.12314e-13	6.18902e-12	WT - Control	limma	3.86291e-06	1.22113e-05	TRUE	enriched hit	5.71274
GLO3	P38682	ADP-ribosylation factor GTPase-activating protein GLO3 OS=Saccharomyces cerevisiae (strain ATCC 204508 / S288c) GN=GLO3 PE=1 SV=1	1	1	3	3	2	6.06857	2.73493	20.2279	11.3071	3.8652e-06	1.22113e-05	5.02227	5.73253e-12	6.14437e-13	6.18902e-12	WT - Control	limma	3.8652e-06	1.22113e-05	TRUE	enriched hit	6.06857
RTT106	P40161	Histone chaperone RTT106 OS=Saccharomyces cerevisiae (strain ATCC 204508 / S288c) GN=RTT106 PE=1 SV=1	1	1	3	3	8	7.06473	5.87888	23.034	11.3023	3.87736e-06	1.22113e-05	5.01902	5.85043e-12	6.25797e-13	6.18902e-12	WT - Control	limma	3.87736e-06	1.22113e-05	TRUE	enriched hit	7.06473
RPL9B	P51401	60S ribosomal protein L9-B OS=Saccharomyces cerevisiae (strain ATCC 204508 / S288c) GN=RPL9B PE=1 SV=1	1	1	3	3	7	7.3492	2.78793	23.883	11.2958	3.89389e-06	1.22127e-05	5.01462	6.01408e-12	6.41487e-13	6.18902e-12	WT - Control	limma	3.89389e-06	1.22127e-05	TRUE	enriched hit	7.3492
HOS3	Q02959	Histone deacetylase HOS3 OS=Saccharomyces cerevisiae (strain ATCC 204508 / S288c) GN=HOS3 PE=1 SV=1	1	1	3	3	3	5.95809	2.51332	21.7565	11.284	3.92452e-06	1.22258e-05	5.0065	6.32694e-12	6.71239e-13	6.18902e-12	WT - Control	limma	3.92452e-06	1.22258e-05	TRUE	enriched hit	5.95809
WTM1	Q12363	Transcriptional modulator WTM1 OS=Saccharomyces cerevisiae (strain ATCC 204508 / S288c) GN=WTM1 PE=1 SV=1	1	1	3	3	2	6.21959	2.0455	21.4272	11.2817	3.93031e-06	1.22258e-05	5.00498	6.38756e-12	6.76966e-13	8.65693e-12	WT - Control	limma	3.93031e-06	1.22258e-05	TRUE	enriched hit	6.21959
SPT15	P13393	TATA-box-binding protein OS=Saccharomyces cerevisiae (strain ATCC 204508 / S288c) GN=SPT15 PE=1 SV=3	1	1	3	3	4	6.90122	3.27223	22.3717	11.2675	3.96751e-06	1.22912e-05	4.99522	6.78813e-12	7.15909e-13	8.65693e-12	WT - Control	limma	3.96751e-06	1.22912e-05	TRUE	enriched hit	6.90122
UME6	P39001	Transcriptional regulatory protein UME6 OS=Saccharomyces cerevisiae (strain ATCC 204508 / S288c) GN=UME6 PE=1 SV=2	1	1	3	3	2	6.10266	3.23124	19.8721	11.2397	1.14023e-05	2.44454e-05	4.07925	7.64011e-12	7.97486e-13	8.65693e-12	WT - Control	limma	1.14023e-05	2.44454e-05	TRUE	enriched hit	6.10266
RPT4	P53549	26S protease subunit RPT4 OS=Saccharomyces cerevisiae (strain ATCC 204508 / S288c) GN=RPT4 PE=1 SV=4	1	1	3	3	2	6.23005	2.26857	22.34	11.2232	4.08571e-06	1.24988e-05	4.9648	8.19744e-12	8.49949e-13	8.65693e-12	WT - Control	limma	4.08571e-06	1.24988e-05	TRUE	enriched hit	6.23005
VPS1	P21576	Vacuolar protein sorting-associated protein 1 OS=Saccharomyces cerevisiae (strain ATCC 204508 / S288c) GN=VPS1 PE=1 SV=2	1	1	3	3	15	6.78705	2.53599	24.6333	11.2194	4.09604e-06	1.24988e-05	4.96218	8.33089e-12	8.62407e-13	8.65693e-12	WT - Control	limma	4.09604e-06	1.24988e-05	TRUE	enriched hit	6.78705
TAL1	P15019	Transaldolase OS=Saccharomyces cerevisiae (strain ATCC 204508 / S288c) GN=TAL1 PE=1 SV=4	1	1	3	3	4	6.16432	2.43335	22.7872	11.2179	4.09996e-06	1.24988e-05	4.96119	8.38196e-12	8.67164e-13	8.65693e-12	WT - Control	limma	4.09996e-06	1.24988e-05	TRUE	enriched hit	6.16432
SKO1	Q02100	CRE-binding bZIP protein SKO1 OS=Saccharomyces cerevisiae (strain ATCC 204508 / S288c) GN=SKO1 PE=1 SV=1	1	1	3	3	6	6.56523	4.77195	22.4691	11.2178	4.10041e-06	1.24988e-05	4.96108	8.38796e-12	8.67722e-13	1.06749e-11	WT - Control	limma	4.10041e-06	1.24988e-05	TRUE	enriched hit	6.56523
ACT1	P60010	Actin OS=Saccharomyces cerevisiae (strain ATCC 204508 / S288c) GN=ACT1 PE=1 SV=1	1	1	3	3	4	7.01936	2.32078	23.0246	11.2048	4.13573e-06	1.25561e-05	4.95219	8.86047e-12	9.12425e-13	1.06749e-11	WT - Control	limma	4.13573e-06	1.25561e-05	TRUE	enriched hit	7.01936
HHO1	P53551	Histone H1 OS=Saccharomyces cerevisiae (strain ATCC 204508 / S288c) GN=HHO1 PE=1 SV=1	1	1	3	3	6	7.28543	4.73041	24.1251	11.1957	4.16091e-06	1.25822e-05	4.9459	9.21019e-12	9.45249e-13	1.56752e-11	WT - Control	limma	4.16091e-06	1.25822e-05	TRUE	enriched hit	7.28543
ADE6	P38972	Phosphoribosylformylglycinamidine synthase OS=Saccharomyces cerevisiae (strain ATCC 204508 / S288c) GN=ADE6 PE=1 SV=2	1	1	3	3	2	5.60782	2.29448	20.0563	11.1727	4.22511e-06	1.27256e-05	4.93002	1.01523e-11	1.03555e-12	1.56752e-11	WT - Control	limma	4.22511e-06	1.27256e-05	TRUE	enriched hit	5.60782
EBP2	P36049	rRNA-processing protein EBP2 OS=Saccharomyces cerevisiae (strain ATCC 204508 / S288c) GN=EBP2 PE=1 SV=1	1	1	3	3	5	6.07885	2.78467	22.0251	11.1653	4.24612e-06	1.27384e-05	4.92488	1.0477e-11	1.06641e-12	1.56752e-11	WT - Control	limma	4.24612e-06	1.27384e-05	TRUE	enriched hit	6.07885
LAT1	P12695	Dihydrolipoyllysine-residue acetyltransferase component of pyruvate dehydrogenase complex, mitochondrial OS=Saccharomyces cerevisiae (strain ATCC 204508 / S288c) GN=LAT1 PE=1 SV=1	1	1	3	3	10	6.83723	2.52488	24.8696	11.1517	4.28483e-06	1.28039e-05	4.91546	1.10967e-11	1.12497e-12	1.56752e-11	WT - Control	limma	4.28483e-06	1.28039e-05	TRUE	enriched hit	6.83723
PAT1	P25644	DNA topoisomerase 2-associated protein PAT1 OS=Saccharomyces cerevisiae (strain ATCC 204508 / S288c) GN=PAT1 PE=1 SV=4	1	1	3	3	3	6.04895	3.0166	21.1854	11.1317	4.3424e-06	1.2925e-05	4.90162	1.20726e-11	1.21622e-12	1.56752e-11	WT - Control	limma	4.3424e-06	1.2925e-05	TRUE	enriched hit	6.04895
MIR1	P23641	Mitochondrial phosphate carrier protein OS=Saccharomyces cerevisiae (strain ATCC 204508 / S288c) GN=MIR1 PE=1 SV=1	1	1	3	3	4	6.19067	2.86637	22.4525	11.1182	4.38176e-06	1.29608e-05	4.89226	1.27787e-11	1.28154e-12	1.56752e-11	WT - Control	limma	4.38176e-06	1.29608e-05	TRUE	enriched hit	6.19067
TEF1	P02994	Elongation factor 1-alpha OS=Saccharomyces cerevisiae (strain ATCC 204508 / S288c) GN=TEF1 PE=1 SV=1	1	1	3	3	11	8.0807	2.14503	26.5967	11.1159	4.38856e-06	1.29608e-05	4.89065	1.29039e-11	1.29307e-12	1.56752e-11	WT - Control	limma	4.38856e-06	1.29608e-05	TRUE	enriched hit	8.0807
HTZ1	Q12692	Histone H2A.Z OS=Saccharomyces cerevisiae (strain ATCC 204508 / S288c) GN=HTZ1 PE=1 SV=3	1	1	3	3	3	6.6964	2.63337	23.4871	11.0806	4.49354e-06	1.32169e-05	4.86611	1.49656e-11	1.48015e-12	1.56752e-11	WT - Control	limma	4.49354e-06	1.32169e-05	TRUE	enriched hit	6.6964
LSM12	P38828	Protein LSM12 OS=Saccharomyces cerevisiae (strain ATCC 204508 / S288c) GN=LSM12 PE=1 SV=1	1	1	3	3	4	5.93313	2.31877	22.257	11.0667	4.53556e-06	1.32169e-05	4.85645	1.58613e-11	1.55993e-12	1.56752e-11	WT - Control	limma	4.53556e-06	1.32169e-05	TRUE	enriched hit	5.93313
APL2	P36000	AP-1 complex subunit beta-1 OS=Saccharomyces cerevisiae (strain ATCC 204508 / S288c) GN=APL2 PE=1 SV=1	1	1	3	3	2	5.57637	2.99285	20.1997	11.0652	4.54016e-06	1.32169e-05	4.8554	1.59619e-11	1.56883e-12	1.56752e-11	WT - Control	limma	4.54016e-06	1.32169e-05	TRUE	enriched hit	5.57637
MRPL24	P36525	54S ribosomal protein L24, mitochondrial OS=Saccharomyces cerevisiae (strain ATCC 204508 / S288c) GN=MRPL24 PE=1 SV=2	1	1	3	3	5	6.52052	2.50558	22.1815	11.0629	4.54723e-06	1.32169e-05	4.85378	1.61176e-11	1.58259e-12	1.56752e-11	WT - Control	limma	4.54723e-06	1.32169e-05	TRUE	enriched hit	6.52052
EFT1	P32324	Elongation factor 2 OS=Saccharomyces cerevisiae (strain ATCC 204508 / S288c) GN=EFT1 PE=1 SV=1	1	1	3	3	18	7.3045	2.23855	25.5173	11.0481	4.59287e-06	1.32169e-05	4.84341	1.71514e-11	1.67326e-12	1.56752e-11	WT - Control	limma	4.59287e-06	1.32169e-05	TRUE	enriched hit	7.3045
TMA19	P35691	Translationally-controlled tumor protein homolog OS=Saccharomyces cerevisiae (strain ATCC 204508 / S288c) GN=TMA19 PE=1 SV=1	1	1	3	3	2	5.73017	2.18243	20.6237	11.0425	4.61016e-06	1.32169e-05	4.83951	1.75566e-11	1.70849e-12	1.56752e-11	WT - Control	limma	4.61016e-06	1.32169e-05	TRUE	enriched hit	5.73017
RSM24	Q03976	37S ribosomal protein S24, mitochondrial OS=Saccharomyces cerevisiae (strain ATCC 204508 / S288c) GN=RSM24 PE=1 SV=1	1	1	3	3	2	5.88403	3.44197	21.1467	11.0425	4.61016e-06	1.32169e-05	4.83951	1.75568e-11	1.70851e-12	1.56752e-11	WT - Control	limma	4.61016e-06	1.32169e-05	TRUE	enriched hit	5.88403
FOX2	Q02207	Peroxisomal hydratase-dehydrogenase-epimerase OS=Saccharomyces cerevisiae (strain ATCC 204508 / S288c) GN=FOX2 PE=2 SV=1	1	1	3	3	20	7.2502	3.80375	25.1459	11.0411	4.61459e-06	1.32169e-05	4.83851	1.76619e-11	1.71761e-12	2.39601e-11	WT - Control	limma	4.61459e-06	1.32169e-05	TRUE	enriched hit	7.2502
PDA1	P16387	Pyruvate dehydrogenase E1 component subunit alpha, mitochondrial OS=Saccharomyces cerevisiae (strain ATCC 204508 / S288c) GN=PDA1 PE=1 SV=2	1	1	3	3	3	6.27457	2.66787	21.9076	11.027	4.65865e-06	1.32929e-05	4.82865	1.87341e-11	1.81399e-12	2.39601e-11	WT - Control	limma	4.65865e-06	1.32929e-05	TRUE	enriched hit	6.27457
LOC1	P43586	60S ribosomal subunit assembly/export protein LOC1 OS=Saccharomyces cerevisiae (strain ATCC 204508 / S288c) GN=LOC1 PE=1 SV=1	1	1	3	3	3	6.71108	3.70623	21.9012	11.006	4.72513e-06	1.34259e-05	4.81393	2.04503e-11	1.96652e-12	2.39601e-11	WT - Control	limma	4.72513e-06	1.34259e-05	TRUE	enriched hit	6.71108
SES1	P07284	Serine--tRNA ligase, cytoplasmic OS=Saccharomyces cerevisiae (strain ATCC 204508 / S288c) GN=SES1 PE=1 SV=2	1	1	3	3	6	6.56839	3.16088	23.315	10.9995	4.74582e-06	1.34259e-05	4.80939	2.1009e-11	2.01573e-12	2.39601e-11	WT - Control	limma	4.74582e-06	1.34259e-05	TRUE	enriched hit	6.56839
HIR2	P32480	Protein HIR2 OS=Saccharomyces cerevisiae (strain ATCC 204508 / S288c) GN=HIR2 PE=1 SV=2	1	1	3	3	10	6.67783	3.67513	23.7108	10.9956	4.75833e-06	1.34259e-05	4.80665	2.13529e-11	2.04591e-12	4.01873e-11	WT - Control	limma	4.75833e-06	1.34259e-05	TRUE	enriched hit	6.67783
NOC2	P39744	Nucleolar complex protein 2 OS=Saccharomyces cerevisiae (strain ATCC 204508 / S288c) GN=NOC2 PE=1 SV=2	1	1	3	3	2	6.1396	2.14803	22.2065	10.9676	4.84928e-06	1.36319e-05	4.78697	2.39895e-11	2.28417e-12	4.01873e-11	WT - Control	limma	4.84928e-06	1.36319e-05	TRUE	enriched hit	6.1396
SAH1	P39954	Adenosylhomocysteinase OS=Saccharomyces cerevisiae (strain ATCC 204508 / S288c) GN=SAH1 PE=1 SV=1	1	1	3	3	2	6.00412	2.77762	20.5072	10.961	4.87122e-06	1.3643e-05	4.78228	2.46627e-11	2.34453e-12	4.01873e-11	WT - Control	limma	4.87122e-06	1.3643e-05	TRUE	enriched hit	6.00412
RPB5	P20434	DNA-directed RNA polymerases I, II, and III subunit RPABC1 OS=Saccharomyces cerevisiae (strain ATCC 204508 / S288c) GN=RPB5 PE=1 SV=1	1	1	3	3	2	6.01886	3.58633	22.8633	10.9324	4.96656e-06	1.38589e-05	4.76213	2.77647e-11	2.62019e-12	4.01873e-11	WT - Control	limma	4.96656e-06	1.38589e-05	TRUE	enriched hit	6.01886
TSL1	P38427	Trehalose synthase complex regulatory subunit TSL1 OS=Saccharomyces cerevisiae (strain ATCC 204508 / S288c) GN=TSL1 PE=1 SV=1	1	1	3	3	4	5.91949	2.29748	21.6217	10.9134	5.03117e-06	1.39877e-05	4.74869	3.00378e-11	2.81965e-12	4.01873e-11	WT - Control	limma	5.03117e-06	1.39877e-05	TRUE	enriched hit	5.91949
SEC61	P32915	Protein transport protein SEC61 OS=Saccharomyces cerevisiae (strain ATCC 204508 / S288c) GN=SEC61 PE=1 SV=1	1	1	3	3	4	6.12696	2.73283	22.5501	10.8969	5.0879e-06	1.40939e-05	4.73703	3.21536e-11	3.00343e-12	4.01873e-11	WT - Control	limma	5.0879e-06	1.40939e-05	TRUE	enriched hit	6.12696
GDH2	P33327	NAD-specific glutamate dehydrogenase OS=Saccharomyces cerevisiae (strain ATCC 204508 / S288c) GN=GDH2 PE=1 SV=1	1	1	3	3	6	6.08513	2.32482	22.9308	10.8822	5.13928e-06	1.41457e-05	4.72658	3.417e-11	3.17688e-12	4.01873e-11	WT - Control	limma	5.13928e-06	1.41457e-05	TRUE	enriched hit	6.08513
APN1	P22936	DNA-(apurinic or apyrimidinic site) lyase 1 OS=Saccharomyces cerevisiae (strain ATCC 204508 / S288c) GN=APN1 PE=1 SV=4	1	1	3	3	5	5.96491	2.69711	22.0638	10.8809	5.14389e-06	1.41457e-05	4.72564	3.43559e-11	3.19279e-12	4.01873e-11	WT - Control	limma	5.14389e-06	1.41457e-05	TRUE	enriched hit	5.96491
EDE1	P34216	EH domain-containing and endocytosis protein 1 OS=Saccharomyces cerevisiae (strain ATCC 204508 / S288c) GN=EDE1 PE=1 SV=2	1	1	3	3	2	5.74277	2.5042	20.7292	10.8627	5.20789e-06	1.42019e-05	4.71278	3.70179e-11	3.41914e-12	4.01873e-11	WT - Control	limma	5.20789e-06	1.42019e-05	TRUE	enriched hit	5.74277
RPL5	P26321	60S ribosomal protein L5 OS=Saccharomyces cerevisiae (strain ATCC 204508 / S288c) GN=RPL5 PE=1 SV=4	1	1	3	3	6	7.47032	2.058	23.3758	10.8571	5.2281e-06	1.42019e-05	4.70875	3.78917e-11	3.49283e-12	4.01873e-11	WT - Control	limma	5.2281e-06	1.42019e-05	TRUE	enriched hit	7.47032
XDJ1	P39102	DnaJ protein homolog XDJ1 OS=Saccharomyces cerevisiae (strain ATCC 204508 / S288c) GN=XDJ1 PE=1 SV=2	1	1	3	3	5	6.11724	2.23958	23.2077	10.8548	5.23628e-06	1.42019e-05	4.70712	3.82501e-11	3.52297e-12	4.01873e-11	WT - Control	limma	5.23628e-06	1.42019e-05	TRUE	enriched hit	6.11724
PET9	P18239	ADP,ATP carrier protein 2 OS=Saccharomyces cerevisiae (strain ATCC 204508 / S288c) GN=PET9 PE=1 SV=2	1	1	3	3	3	7.19958	2.51608	22.8998	10.854	5.23918e-06	1.42019e-05	4.70655	3.83777e-11	3.53369e-12	1.83337e-10	WT - Control	limma	5.23918e-06	1.42019e-05	TRUE	enriched hit	7.19958
PHO2	P07269	Regulatory protein PHO2 OS=Saccharomyces cerevisiae (strain ATCC 204508 / S288c) GN=PHO2 PE=1 SV=1	1	1	3	3	3	5.68498	2.72139	20.6416	10.7782	5.51848e-06	1.49058e-05	4.65247	5.23526e-11	4.78685e-12	1.83337e-10	WT - Control	limma	5.51848e-06	1.49058e-05	TRUE	enriched hit	5.68498
TOP2	P06786	DNA topoisomerase 2 OS=Saccharomyces cerevisiae (strain ATCC 204508 / S288c) GN=TOP2 PE=1 SV=2	1	1	3	3	16	6.94653	3.02512	24.8326	10.7471	5.63796e-06	1.51745e-05	4.63016	5.94362e-11	5.41541e-12	1.83337e-10	WT - Control	limma	5.63796e-06	1.51745e-05	TRUE	enriched hit	6.94653
RPL25	P04456	60S ribosomal protein L25 OS=Saccharomyces cerevisiae (strain ATCC 204508 / S288c) GN=RPL25 PE=1 SV=4	1	1	3	3	7	7.89285	2.30673	24.5449	10.7121	5.77624e-06	1.54917e-05	4.60491	6.85552e-11	6.21808e-12	1.83337e-10	WT - Control	limma	5.77624e-06	1.54917e-05	TRUE	enriched hit	7.89285
FRS2	P15625	Phenylalanine--tRNA ligase alpha subunit OS=Saccharomyces cerevisiae (strain ATCC 204508 / S288c) GN=FRS2 PE=1 SV=3	1	1	3	3	4	5.86074	2.78313	22.1604	10.6925	5.85504e-06	1.55973e-05	4.59079	7.4224e-11	6.71343e-12	1.83337e-10	WT - Control	limma	5.85504e-06	1.55973e-05	TRUE	enriched hit	5.86074
SPS19	P32573	Peroxisomal 2,4-dienoyl-CoA reductase SPS19 OS=Saccharomyces cerevisiae (strain ATCC 204508 / S288c) GN=SPS19 PE=1 SV=4	1	1	3	3	2	5.91792	2.91739	20.747	10.6921	5.85668e-06	1.55973e-05	4.59049	7.43456e-11	6.72403e-12	1.83337e-10	WT - Control	limma	5.85668e-06	1.55973e-05	TRUE	enriched hit	5.91792
YAT1	P80235	Putative mitochondrial carnitine O-acetyltransferase OS=Saccharomyces cerevisiae (strain ATCC 204508 / S288c) GN=YAT1 PE=1 SV=2	1	1	3	3	5	6.62087	3.10164	23.2782	10.6717	5.94e-06	1.57638e-05	4.57577	8.07423e-11	7.27959e-12	2.40376e-10	WT - Control	limma	5.94e-06	1.57638e-05	TRUE	enriched hit	6.62087
YGL108C	P53139	Uncharacterized protein YGL108C OS=Saccharomyces cerevisiae (strain ATCC 204508 / S288c) GN=YGL108C PE=1 SV=1	1	1	3	3	2	5.94007	2.4512	21.541	10.6449	6.05184e-06	1.60047e-05	4.55631	8.99998e-11	8.08615e-12	2.49628e-10	WT - Control	limma	6.05184e-06	1.60047e-05	TRUE	enriched hit	5.94007
AMS1	P22855	Alpha-mannosidase OS=Saccharomyces cerevisiae (strain ATCC 204508 / S288c) GN=AMS1 PE=1 SV=2	1	1	3	3	2	5.76688	2.0909	21.46	10.5692	6.37985e-06	1.68136e-05	4.50124	1.22026e-10	1.08387e-11	2.49628e-10	WT - Control	limma	6.37985e-06	1.68136e-05	TRUE	enriched hit	5.76688
HSV2	P50079	SVP1-like protein 2 OS=Saccharomyces cerevisiae (strain ATCC 204508 / S288c) GN=HSV2 PE=1 SV=1	1	1	3	3	4	6.14961	2.06814	22.3996	10.5594	6.42374e-06	1.68707e-05	4.49408	1.2691e-10	1.1253e-11	2.49628e-10	WT - Control	limma	6.42374e-06	1.68707e-05	TRUE	enriched hit	6.14961
MCM3	P24279	DNA replication licensing factor MCM3 OS=Saccharomyces cerevisiae (strain ATCC 204508 / S288c) GN=MCM3 PE=1 SV=1	1	1	3	3	2	5.78078	2.61616	20.5603	10.5216	6.5966e-06	1.72649e-05	4.46635	1.47653e-10	1.29964e-11	2.49628e-10	WT - Control	limma	6.5966e-06	1.72649e-05	TRUE	enriched hit	5.78078
TIF35	Q04067	Eukaryotic translation initiation factor 3 subunit G OS=Saccharomyces cerevisiae (strain ATCC 204508 / S288c) GN=TIF35 PE=1 SV=1	1	1	3	3	3	6.28815	2.16913	21.962	10.512	6.64116e-06	1.73218e-05	4.45932	1.53406e-10	1.34755e-11	2.49628e-10	WT - Control	limma	6.64116e-06	1.73218e-05	TRUE	enriched hit	6.28815
CFT2	Q12102	Cleavage factor two protein 2 OS=Saccharomyces cerevisiae (strain ATCC 204508 / S288c) GN=CFT2 PE=1 SV=1	1	1	3	3	2	5.47213	1.90118	20.5559	10.4955	6.71892e-06	1.74619e-05	4.44716	1.63864e-10	1.43413e-11	2.49628e-10	WT - Control	limma	6.71892e-06	1.74619e-05	TRUE	enriched hit	5.47213
NGG1	P32494	Chromatin-remodeling complexes subunit NGG1 OS=Saccharomyces cerevisiae (strain ATCC 204508 / S288c) GN=NGG1 PE=1 SV=1	1	1	3	3	3	5.72702	2.60938	21.252	10.4865	6.76153e-06	1.74619e-05	4.44056	1.69825e-10	1.4832e-11	2.49628e-10	WT - Control	limma	6.76153e-06	1.74619e-05	TRUE	enriched hit	5.72702
HSP104	P31539	Heat shock protein 104 OS=Saccharomyces cerevisiae (strain ATCC 204508 / S288c) GN=HSP104 PE=1 SV=2	1	1	3	3	9	6.24771	2.05796	22.7771	10.486	6.76389e-06	1.74619e-05	4.44019	1.70159e-10	1.48595e-11	2.49628e-10	WT - Control	limma	6.76389e-06	1.74619e-05	TRUE	enriched hit	6.24771
POL30	P15873	Proliferating cell nuclear antigen OS=Saccharomyces cerevisiae (strain ATCC 204508 / S288c) GN=POL30 PE=1 SV=1	1	1	3	3	2	5.82849	2.28659	20.8947	10.4604	6.88697e-06	1.77194e-05	4.42135	1.88357e-10	1.63446e-11	2.49628e-10	WT - Control	limma	6.88697e-06	1.77194e-05	TRUE	enriched hit	5.82849
HTB1	P02293	Histone H2B.1 OS=Saccharomyces cerevisiae (strain ATCC 204508 / S288c) GN=HTB1 PE=1 SV=2	1	1	3	3	2	6.85399	5.2202	24.1294	10.4555	6.91099e-06	1.77211e-05	4.41771	1.92079e-10	1.6646e-11	2.49628e-10	WT - Control	limma	6.91099e-06	1.77211e-05	TRUE	enriched hit	6.85399
HHF1	P02309	Histone H4 OS=Saccharomyces cerevisiae (strain ATCC 204508 / S288c) GN=HHF1 PE=1 SV=2	1	1	3	3	8	7.93441	3.62414	25.9667	10.4327	7.02355e-06	1.78987e-05	4.40082	2.10288e-10	1.81096e-11	2.49628e-10	WT - Control	limma	7.02355e-06	1.78987e-05	TRUE	enriched hit	7.93441
SEG1	Q04279	Eisosome protein SEG1 OS=Saccharomyces cerevisiae (strain ATCC 204508 / S288c) GN=SEG1 PE=1 SV=1	1	1	3	3	2	6.12817	2.30965	21.582	10.4319	7.02742e-06	1.78987e-05	4.40025	2.10936e-10	1.81613e-11	2.49628e-10	WT - Control	limma	7.02742e-06	1.78987e-05	TRUE	enriched hit	6.12817
BDP1	P46678	Transcription factor TFIIIB component B'' OS=Saccharomyces cerevisiae (strain ATCC 204508 / S288c) GN=BDP1 PE=1 SV=1	1	1	3	3	12	7.40508	4.52585	24.1458	10.4196	7.08898e-06	1.79951e-05	4.39113	2.2147e-10	1.89993e-11	2.49628e-10	WT - Control	limma	7.08898e-06	1.79951e-05	TRUE	enriched hit	7.40508
ERG20	P08524	Farnesyl pyrophosphate synthase OS=Saccharomyces cerevisiae (strain ATCC 204508 / S288c) GN=ERG20 PE=1 SV=2	1	1	3	3	2	6.05916	2.36025	20.3817	10.4128	7.12301e-06	1.80212e-05	4.38612	2.27467e-10	1.94736e-11	2.49628e-10	WT - Control	limma	7.12301e-06	1.80212e-05	TRUE	enriched hit	6.05916
DBP5	P20449	ATP-dependent RNA helicase DBP5 OS=Saccharomyces cerevisiae (strain ATCC 204508 / S288c) GN=DBP5 PE=1 SV=2	1	1	3	3	5	6.23072	3.80927	22.7382	10.4021	7.17767e-06	1.80992e-05	4.37813	2.3736e-10	2.02518e-11	2.49628e-10	WT - Control	limma	7.17767e-06	1.80992e-05	TRUE	enriched hit	6.23072
GRS1	P38088-2	Isoform Cytoplasmic of Glycine--tRNA ligase 1, mitochondrial OS=Saccharomyces cerevisiae (strain ATCC 204508 / S288c) GN=GRS1	1	1	3	3	11	6.53678	2.13791	24.0285	10.393	7.22378e-06	1.8139e-05	4.37143	2.45964e-10	2.09244e-11	2.49628e-10	WT - Control	limma	7.22378e-06	1.8139e-05	TRUE	enriched hit	6.53678
BBC1	P47068	Myosin tail region-interacting protein MTI1 OS=Saccharomyces cerevisiae (strain ATCC 204508 / S288c) GN=BBC1 PE=1 SV=2	1	1	3	3	6	6.46664	2.5249	23.2575	10.3896	7.24126e-06	1.8139e-05	4.3689	2.49289e-10	2.11832e-11	2.49628e-10	WT - Control	limma	7.24126e-06	1.8139e-05	TRUE	enriched hit	6.46664
EAF3	Q12432	Chromatin modification-related protein EAF3 OS=Saccharomyces cerevisiae (strain ATCC 204508 / S288c) GN=EAF3 PE=1 SV=1	1	1	3	3	5	6.12645	2.38388	22.8217	10.3819	7.28118e-06	1.8179e-05	4.36315	2.5701e-10	2.1782e-11	2.49628e-10	WT - Control	limma	7.28118e-06	1.8179e-05	TRUE	enriched hit	6.12645
RSF1	Q05043	Respiration factor 1 OS=Saccharomyces cerevisiae (strain ATCC 204508 / S288c) GN=RSF1 PE=1 SV=1	1	1	3	3	2	5.86691	3.77935	21.5649	10.3643	7.37285e-06	1.83018e-05	4.35007	2.75441e-10	2.3199e-11	2.49628e-10	WT - Control	limma	7.37285e-06	1.83018e-05	TRUE	enriched hit	5.86691
PDC1	P06169	Pyruvate decarboxylase isozyme 1 OS=Saccharomyces cerevisiae (strain ATCC 204508 / S288c) GN=PDC1 PE=1 SV=7	1	1	3	3	7	7.02218	2.69915	25.0777	10.3632	7.37858e-06	1.83018e-05	4.34925	2.76627e-10	2.32896e-11	2.49628e-10	WT - Control	limma	7.37858e-06	1.83018e-05	TRUE	enriched hit	7.02218
RAD16	P31244	DNA repair protein RAD16 OS=Saccharomyces cerevisiae (strain ATCC 204508 / S288c) GN=RAD16 PE=1 SV=1	1	1	3	3	4	5.70823	2.35239	22.0705	10.337	7.51777e-06	1.85521e-05	4.3297	3.0665e-10	2.55584e-11	2.49628e-10	WT - Control	limma	7.51777e-06	1.85521e-05	TRUE	enriched hit	5.70823
SPB4	P25808	ATP-dependent rRNA helicase SPB4 OS=Saccharomyces cerevisiae (strain ATCC 204508 / S288c) GN=SPB4 PE=1 SV=1	1	1	3	3	2	5.49925	2.50208	20.1445	10.3338	7.5352e-06	1.85521e-05	4.32728	3.10582e-10	2.58522e-11	2.49628e-10	WT - Control	limma	7.5352e-06	1.85521e-05	TRUE	enriched hit	5.49925
MRPS9	P38120	37S ribosomal protein S9, mitochondrial OS=Saccharomyces cerevisiae (strain ATCC 204508 / S288c) GN=MRPS9 PE=1 SV=1	1	1	3	3	3	6.38743	2.66204	22.8403	10.3223	7.59747e-06	1.85521e-05	4.31867	3.24941e-10	2.69185e-11	2.49628e-10	WT - Control	limma	7.59747e-06	1.85521e-05	TRUE	enriched hit	6.38743
RTS2	P40962	Zinc finger protein RTS2 OS=Saccharomyces cerevisiae (strain ATCC 204508 / S288c) GN=RTS2 PE=1 SV=1	1	1	3	3	2	5.68878	2.50629	20.6268	10.3168	7.6274e-06	1.85521e-05	4.31455	3.32023e-10	2.74407e-11	2.49628e-10	WT - Control	limma	7.6274e-06	1.85521e-05	TRUE	enriched hit	5.68878
OSM1	P21375	Fumarate reductase 2 OS=Saccharomyces cerevisiae (strain ATCC 204508 / S288c) GN=OSM1 PE=1 SV=3	1	1	3	3	2	5.61045	2.18899	20.5489	10.3107	7.66043e-06	1.85521e-05	4.31003	3.39976e-10	2.80243e-11	2.49628e-10	WT - Control	limma	7.66043e-06	1.85521e-05	TRUE	enriched hit	5.61045
TMA7	Q3E764	Translation machinery-associated protein 7 OS=Saccharomyces cerevisiae (strain ATCC 204508 / S288c) GN=TMA7 PE=1 SV=1	1	1	3	3	2	6.3567	2.32697	22.1828	10.3079	7.67572e-06	1.85521e-05	4.30794	3.43708e-10	2.82969e-11	2.49628e-10	WT - Control	limma	7.67572e-06	1.85521e-05	TRUE	enriched hit	6.3567
OAF1	P39720	Oleate-activated transcription factor 1 OS=Saccharomyces cerevisiae (strain ATCC 204508 / S288c) GN=OAF1 PE=1 SV=3	1	1	3	3	3	6.14483	2.05173	22.4933	10.3061	7.686e-06	1.85521e-05	4.30654	3.46234e-10	2.84812e-11	2.49628e-10	WT - Control	limma	7.686e-06	1.85521e-05	TRUE	enriched hit	6.14483
KAP95	Q06142	Importin subunit beta-1 OS=Saccharomyces cerevisiae (strain ATCC 204508 / S288c) GN=KAP95 PE=1 SV=1	1	1	3	3	4	6.38918	2.54094	22.7561	10.3036	7.69949e-06	1.85521e-05	4.3047	3.49572e-10	2.87242e-11	3.05212e-10	WT - Control	limma	7.69949e-06	1.85521e-05	TRUE	enriched hit	6.38918
NUP145	P49687	Nucleoporin NUP145 OS=Saccharomyces cerevisiae (strain ATCC 204508 / S288c) GN=NUP145 PE=1 SV=1	1	1	3	3	2	5.88873	2.06514	20.1241	10.2876	7.78806e-06	1.87061e-05	4.29273	3.72099e-10	3.03909e-11	3.05212e-10	WT - Control	limma	7.78806e-06	1.87061e-05	TRUE	enriched hit	5.88873
YER079W	P40052	Uncharacterized protein YER079W OS=Saccharomyces cerevisiae (strain ATCC 204508 / S288c) GN=YER079W PE=1 SV=1	1	1	3	3	2	5.5752	1.91261	20.5042	10.2729	7.87095e-06	1.87906e-05	4.28165	3.94183e-10	3.20055e-11	3.05212e-10	WT - Control	limma	7.87095e-06	1.87906e-05	TRUE	enriched hit	5.5752
MDG1	P53885	Signal transduction protein MDG1 OS=Saccharomyces cerevisiae (strain ATCC 204508 / S288c) GN=MDG1 PE=1 SV=1	1	1	3	3	3	6.34562	2.77436	21.2484	10.267	7.90406e-06	1.87906e-05	4.27725	4.0328e-10	3.2665e-11	3.05212e-10	WT - Control	limma	7.90406e-06	1.87906e-05	TRUE	enriched hit	6.34562
CDC3	P32457	Cell division control protein 3 OS=Saccharomyces cerevisiae (strain ATCC 204508 / S288c) GN=CDC3 PE=1 SV=3	1	1	3	3	4	5.9803	2.5408	21.5305	10.2665	7.90717e-06	1.87906e-05	4.27684	4.04143e-10	3.27274e-11	3.05212e-10	WT - Control	limma	7.90717e-06	1.87906e-05	TRUE	enriched hit	5.9803
GAR1	P28007	H/ACA ribonucleoprotein complex subunit 1 OS=Saccharomyces cerevisiae (strain ATCC 204508 / S288c) GN=GAR1 PE=1 SV=1	1	1	3	3	2	6.53988	2.53745	21.4682	10.2638	7.92224e-06	1.87906e-05	4.27484	4.08344e-10	3.30309e-11	5.67182e-10	WT - Control	limma	7.92224e-06	1.87906e-05	TRUE	enriched hit	6.53988
CDC12	P32468	Cell division control protein 12 OS=Saccharomyces cerevisiae (strain ATCC 204508 / S288c) GN=CDC12 PE=1 SV=1	1	1	3	3	5	6.44737	2.6186	22.5346	10.2127	8.21932e-06	1.93626e-05	4.23628	4.98243e-10	3.97925e-11	5.67182e-10	WT - Control	limma	8.21932e-06	1.93626e-05	TRUE	enriched hit	6.44737
ERV29	P53337	ER-derived vesicles protein ERV29 OS=Saccharomyces cerevisiae (strain ATCC 204508 / S288c) GN=ERV29 PE=1 SV=1	1	1	3	3	2	5.65105	3.09893	19.2991	10.2113	8.22733e-06	1.93626e-05	4.23526	5.0086e-10	3.99868e-11	5.67182e-10	WT - Control	limma	8.22733e-06	1.93626e-05	TRUE	enriched hit	5.65105
IFM1	P25038	Translation initiation factor IF-2, mitochondrial OS=Saccharomyces cerevisiae (strain ATCC 204508 / S288c) GN=IFM1 PE=1 SV=2	1	1	3	3	4	5.87324	1.94464	21.8517	10.2092	8.23994e-06	1.93626e-05	4.23366	5.05003e-10	4.02941e-11	5.67182e-10	WT - Control	limma	8.23994e-06	1.93626e-05	TRUE	enriched hit	5.87324
SMC2	P38989	Structural maintenance of chromosomes protein 2 OS=Saccharomyces cerevisiae (strain ATCC 204508 / S288c) GN=SMC2 PE=1 SV=1	1	1	3	3	7	6.01037	2.81133	22.9576	10.2018	8.28419e-06	1.94065e-05	4.22805	5.19747e-10	4.13847e-11	5.67182e-10	WT - Control	limma	8.28419e-06	1.94065e-05	TRUE	enriched hit	6.01037
PMT1	P33775	Dolichyl-phosphate-mannose--protein mannosyltransferase 1 OS=Saccharomyces cerevisiae (strain ATCC 204508 / S288c) GN=PMT1 PE=1 SV=1	1	1	3	3	4	5.72754	2.2246	21.314	10.1918	8.34436e-06	1.94605e-05	4.22046	5.40323e-10	4.28991e-11	5.67182e-10	WT - Control	limma	8.34436e-06	1.94605e-05	TRUE	enriched hit	5.72754
YGR169C-A	Q3E772	Uncharacterized protein YGR169C-A OS=Saccharomyces cerevisiae (strain ATCC 204508 / S288c) GN=YGR169C-A PE=4 SV=1	1	1	3	3	4	6.23304	3.3348	23.0441	10.1894	8.35855e-06	1.94605e-05	4.21868	5.45266e-10	4.32616e-11	5.67182e-10	WT - Control	limma	8.35855e-06	1.94605e-05	TRUE	enriched hit	6.23304
TRA1	P38811	Transcription-associated protein 1 OS=Saccharomyces cerevisiae (strain ATCC 204508 / S288c) GN=TRA1 PE=1 SV=1	1	1	3	3	18	6.68343	3.20335	24.1498	10.182	8.40377e-06	1.9506e-05	4.21303	5.6125e-10	4.44304e-11	8.12326e-10	WT - Control	limma	8.40377e-06	1.9506e-05	TRUE	enriched hit	6.68343
RPL20A|RPL20B	P0CX23|P0CX24	60S ribosomal protein L20-A OS=Saccharomyces cerevisiae (strain ATCC 204508 / S288c) GN=RPL20A PE=1 SV=1|60S ribosomal protein L20-B OS=Saccharomyces cerevisiae (strain ATCC 204508 / S288c) GN=RPL20B PE=1 SV=1	1	1	3	3	7	7.16083	2.35849	24.4892	10.1619	8.52673e-06	1.97311e-05	4.1978	6.06524e-10	4.78036e-11	8.12326e-10	WT - Control	limma	8.52673e-06	1.97311e-05	TRUE	enriched hit	7.16083
YDR341C	Q05506	Arginine--tRNA ligase, cytoplasmic OS=Saccharomyces cerevisiae (strain ATCC 204508 / S288c) GN=YDR341C PE=1 SV=1	1	1	3	3	3	5.62222	2.29241	20.6608	10.141	8.65707e-06	1.99718e-05	4.1819	6.57521e-10	5.15678e-11	8.12326e-10	WT - Control	limma	8.65707e-06	1.99718e-05	TRUE	enriched hit	5.62222
RPL15A	P05748	60S ribosomal protein L15-A OS=Saccharomyces cerevisiae (strain ATCC 204508 / S288c) GN=RPL15A PE=1 SV=3	1	1	3	3	7	8.06572	3.98903	25.0713	10.1329	8.70773e-06	2.00278e-05	4.17578	6.78202e-10	5.30838e-11	8.12326e-10	WT - Control	limma	8.70773e-06	2.00278e-05	TRUE	enriched hit	8.06572
CBF5	P33322	H/ACA ribonucleoprotein complex subunit 4 OS=Saccharomyces cerevisiae (strain ATCC 204508 / S288c) GN=CBF5 PE=1 SV=1	1	1	3	3	4	6.44731	3.70665	22.292	10.1183	8.80058e-06	2.01802e-05	4.16466	7.17394e-10	5.59401e-11	8.12326e-10	WT - Control	limma	8.80058e-06	2.01802e-05	TRUE	enriched hit	6.44731
APE2	P32454	Aminopeptidase 2, mitochondrial OS=Saccharomyces cerevisiae (strain ATCC 204508 / S288c) GN=APE2 PE=1 SV=4	1	1	3	3	2	5.69641	2.84237	20.6594	10.1106	8.85013e-06	2.02327e-05	4.15877	7.39004e-10	5.75059e-11	8.12326e-10	WT - Control	limma	8.85013e-06	2.02327e-05	TRUE	enriched hit	5.69641
NOP16	P40007	Nucleolar protein 16 OS=Saccharomyces cerevisiae (strain ATCC 204508 / S288c) GN=NOP16 PE=1 SV=1	1	1	3	3	2	6.03906	2.10925	20.9601	10.1053	8.88485e-06	2.02511e-05	4.15466	7.54442e-10	5.86205e-11	8.12326e-10	WT - Control	limma	8.88485e-06	2.02511e-05	TRUE	enriched hit	6.03906
REP2	P03872	Partitioning protein REP2 OS=Saccharomyces cerevisiae (strain ATCC 204508 / S288c) GN=REP2 PE=1 SV=1	1	1	3	3	2	5.60068	2.67677	19.8659	10.0965	8.94169e-06	2.03196e-05	4.14797	7.80243e-10	6.0476e-11	9.2592e-10	WT - Control	limma	8.94169e-06	2.03196e-05	TRUE	enriched hit	5.60068
SEC26	P41810	Coatomer subunit beta OS=Saccharomyces cerevisiae (strain ATCC 204508 / S288c) GN=SEC26 PE=1 SV=2	1	1	3	3	2	5.68248	1.95196	20.1125	10.0848	9.01793e-06	2.04317e-05	4.13907	8.15902e-10	6.30517e-11	1.61464e-09	WT - Control	limma	9.01793e-06	2.04317e-05	TRUE	enriched hit	5.68248
MKT1	P40850	Protein MKT1 OS=Saccharomyces cerevisiae (strain ATCC 204508 / S288c) GN=MKT1 PE=1 SV=2	1	1	3	3	5	6.01777	2.19419	21.9056	10.0657	9.14501e-06	2.06579e-05	4.12439	8.78086e-10	6.76559e-11	2.02199e-09	WT - Control	limma	9.14501e-06	2.06579e-05	TRUE	enriched hit	6.01777
ARE2	P53629	Sterol O-acyltransferase 2 OS=Saccharomyces cerevisiae (strain ATCC 204508 / S288c) GN=ARE2 PE=1 SV=1	1	1	3	3	2	5.83183	1.98118	20.9444	10.0266	9.4104e-06	2.11944e-05	4.09436	1.01954e-09	7.81338e-11	2.02199e-09	WT - Control	limma	9.4104e-06	2.11944e-05	TRUE	enriched hit	5.83183
RFC3	P38629	Replication factor C subunit 3 OS=Saccharomyces cerevisiae (strain ATCC 204508 / S288c) GN=RFC3 PE=1 SV=1	1	1	3	3	3	5.51521	2.35313	20.8434	10.012	9.51145e-06	2.13585e-05	4.08315	1.07772e-09	8.24104e-11	2.02199e-09	WT - Control	limma	9.51145e-06	2.13585e-05	TRUE	enriched hit	5.51521
MRP20	P32387	54S ribosomal protein L41, mitochondrial OS=Saccharomyces cerevisiae (strain ATCC 204508 / S288c) GN=MRP20 PE=1 SV=1	1	1	3	3	3	6.12357	2.01339	21.4772	10.0003	9.59388e-06	2.14801e-05	4.07409	1.12702e-09	8.602e-11	2.02199e-09	WT - Control	limma	9.59388e-06	2.14801e-05	TRUE	enriched hit	6.12357
JIP5	Q06214	WD repeat-containing protein JIP5 OS=Saccharomyces cerevisiae (strain ATCC 204508 / S288c) GN=JIP5 PE=1 SV=2	1	1	3	3	3	5.95993	2.46243	21.5233	9.9819	9.72441e-06	2.17083e-05	4.0599	1.20856e-09	9.19606e-11	2.02199e-09	WT - Control	limma	9.72441e-06	2.17083e-05	TRUE	enriched hit	5.95993
TPS1	Q00764	Alpha,alpha-trehalose-phosphate synthase [UDP-forming] 56 kDa subunit OS=Saccharomyces cerevisiae (strain ATCC 204508 / S288c) GN=TPS1 PE=1 SV=2	1	1	3	3	3	6.35203	2.02977	22.1273	9.96936	9.81457e-06	2.18453e-05	4.05021	1.26744e-09	9.62279e-11	2.24181e-09	WT - Control	limma	9.81457e-06	2.18453e-05	TRUE	enriched hit	6.35203
ERB1	Q04660	Ribosome biogenesis protein ERB1 OS=Saccharomyces cerevisiae (strain ATCC 204508 / S288c) GN=ERB1 PE=1 SV=1	1	1	3	3	5	6.03005	2.43539	22.1103	9.94457	9.99565e-06	2.21833e-05	4.03101	1.39225e-09	1.05258e-10	2.24181e-09	WT - Control	limma	9.99565e-06	2.21833e-05	TRUE	enriched hit	6.03005
RPH1	P39956	DNA damage-responsive transcriptional repressor RPH1 OS=Saccharomyces cerevisiae (strain ATCC 204508 / S288c) GN=RPH1 PE=1 SV=1	1	1	3	3	2	5.79441	4.02404	20.3343	9.92894	1.01118e-05	2.23757e-05	4.01887	1.47706e-09	1.11352e-10	2.24181e-09	WT - Control	limma	1.01118e-05	2.23757e-05	TRUE	enriched hit	5.79441
CRC1	Q12289	Mitochondrial carnitine carrier OS=Saccharomyces cerevisiae (strain ATCC 204508 / S288c) GN=CRC1 PE=1 SV=1	1	1	3	3	4	6.04716	1.82802	22.5963	9.90936	1.02593e-05	2.26361e-05	4.00365	1.59032e-09	1.19435e-10	2.24181e-09	WT - Control	limma	1.02593e-05	2.26361e-05	TRUE	enriched hit	6.04716
IPP1	P00817	Inorganic pyrophosphatase OS=Saccharomyces cerevisiae (strain ATCC 204508 / S288c) GN=IPP1 PE=1 SV=4	1	1	3	3	2	5.92746	1.85053	21.061	9.89884	1.03396e-05	2.27472e-05	3.99546	1.65467e-09	1.24001e-10	2.24181e-09	WT - Control	limma	1.03396e-05	2.27472e-05	TRUE	enriched hit	5.92746
YTA7	P40340	Tat-binding homolog 7 OS=Saccharomyces cerevisiae (strain ATCC 204508 / S288c) GN=YTA7 PE=1 SV=2	1	1	3	3	32	7.9559	4.58552	25.8194	9.86709	1.05862e-05	2.31654e-05	3.97068	1.8646e-09	1.38759e-10	2.24181e-09	WT - Control	limma	1.05862e-05	2.31654e-05	TRUE	enriched hit	7.9559
RPL16A	P26784	60S ribosomal protein L16-A OS=Saccharomyces cerevisiae (strain ATCC 204508 / S288c) GN=RPL16A PE=1 SV=3	1	1	3	3	6	7.52761	3.44934	23.4284	9.86651	1.05908e-05	2.31654e-05	3.97023	1.86864e-09	1.39042e-10	2.24181e-09	WT - Control	limma	1.05908e-05	2.31654e-05	TRUE	enriched hit	7.52761
RPN1	P38764	26S proteasome regulatory subunit RPN1 OS=Saccharomyces cerevisiae (strain ATCC 204508 / S288c) GN=RPN1 PE=1 SV=3	1	1	3	3	4	5.72456	2.18048	21.7469	9.85178	1.07074e-05	2.33532e-05	3.95871	1.97484e-09	1.46427e-10	2.24181e-09	WT - Control	limma	1.07074e-05	2.33532e-05	TRUE	enriched hit	5.72456
SUC2	P00724|P00724-2	Invertase 2 OS=Saccharomyces cerevisiae (strain ATCC 204508 / S288c) GN=SUC2 PE=1 SV=1|Isoform Intracellular of Invertase 2 OS=Saccharomyces cerevisiae (strain ATCC 204508 / S288c) GN=SUC2	1	1	3	3	3	6.10598	2.79453	21.4306	9.83725	1.08239e-05	2.35397e-05	3.94733	2.08539e-09	1.54061e-10	2.24181e-09	WT - Control	limma	1.08239e-05	2.35397e-05	TRUE	enriched hit	6.10598
CDC19	P00549	Pyruvate kinase 1 OS=Saccharomyces cerevisiae (strain ATCC 204508 / S288c) GN=CDC19 PE=1 SV=2	1	1	3	3	12	7.41103	1.79322	24.6137	9.83302	1.08582e-05	2.35467e-05	3.94401	2.11872e-09	1.56351e-10	2.24181e-09	WT - Control	limma	1.08582e-05	2.35467e-05	TRUE	enriched hit	7.41103
SCY1	P53009	Protein kinase-like protein SCY1 OS=Saccharomyces cerevisiae (strain ATCC 204508 / S288c) GN=SCY1 PE=1 SV=1	1	1	3	3	4	5.69462	2.06347	21.6417	9.81539	1.10019e-05	2.37394e-05	3.93018	2.26313e-09	1.66218e-10	2.24181e-09	WT - Control	limma	1.10019e-05	2.37394e-05	TRUE	enriched hit	5.69462
VAC8	P39968	Vacuolar protein 8 OS=Saccharomyces cerevisiae (strain ATCC 204508 / S288c) GN=VAC8 PE=1 SV=3	1	1	3	3	2	5.91338	2.1195	21.508	9.81396	1.10136e-05	2.37394e-05	3.92906	2.27521e-09	1.6704e-10	2.24181e-09	WT - Control	limma	1.10136e-05	2.37394e-05	TRUE	enriched hit	5.91338
ZTA1	P38230	Probable quinone oxidoreductase OS=Saccharomyces cerevisiae (strain ATCC 204508 / S288c) GN=ZTA1 PE=1 SV=1	1	1	3	3	5	6.44127	2.35697	23.378	9.81066	1.10409e-05	2.37394e-05	3.92646	2.3035e-09	1.6896e-10	3.25455e-09	WT - Control	limma	1.10409e-05	2.37394e-05	TRUE	enriched hit	6.44127
RPS23A|RPS23B	P0CX29|P0CX30	40S ribosomal protein S23-A OS=Saccharomyces cerevisiae (strain ATCC 204508 / S288c) GN=RPS23A PE=1 SV=1|40S ribosomal protein S23-B OS=Saccharomyces cerevisiae (strain ATCC 204508 / S288c) GN=RPS23B PE=1 SV=1	1	1	3	3	7	7.83702	3.46658	25.1295	9.76396	1.14336e-05	2.44454e-05	3.88969	2.74138e-09	1.99113e-10	3.25455e-09	WT - Control	limma	1.14336e-05	2.44454e-05	TRUE	enriched hit	7.83702
YTM1	Q12024	Ribosome biogenesis protein YTM1 OS=Saccharomyces cerevisiae (strain ATCC 204508 / S288c) GN=YTM1 PE=1 SV=1	1	1	3	3	2	6.12499	2.60061	21.5567	9.75235	1.15337e-05	2.45902e-05	3.88051	2.86234e-09	2.07339e-10	3.25455e-09	WT - Control	limma	1.15337e-05	2.45902e-05	TRUE	enriched hit	6.12499
HTA1|HTA2	P04911|P04912	Histone H2A.1 OS=Saccharomyces cerevisiae (strain ATCC 204508 / S288c) GN=HTA1 PE=1 SV=2|Histone H2A.2 OS=Saccharomyces cerevisiae (strain ATCC 204508 / S288c) GN=HTA2 PE=1 SV=2	1	1	3	3	4	7.63201	6.28914	25.0475	9.74083	1.16339e-05	2.47343e-05	3.87141	2.98733e-09	2.15792e-10	3.25455e-09	WT - Control	limma	1.16339e-05	2.47343e-05	TRUE	enriched hit	7.63201
RPL4A	P10664	60S ribosomal protein L4-A OS=Saccharomyces cerevisiae (strain ATCC 204508 / S288c) GN=RPL4A PE=1 SV=4	1	1	3	3	10	8.14041	3.04717	25.4412	9.73642	1.16726e-05	2.47472e-05	3.86791	3.03667e-09	2.19117e-10	3.25455e-09	WT - Control	limma	1.16726e-05	2.47472e-05	TRUE	enriched hit	8.14041
RNR4	P49723	Ribonucleoside-diphosphate reductase small chain 2 OS=Saccharomyces cerevisiae (strain ATCC 204508 / S288c) GN=RNR4 PE=1 SV=1	1	1	3	3	2	5.60883	1.9124	20.6842	9.72772	1.17493e-05	2.48404e-05	3.86102	3.13624e-09	2.25803e-10	3.25455e-09	WT - Control	limma	1.17493e-05	2.48404e-05	TRUE	enriched hit	5.60883
PGI1	P12709	Glucose-6-phosphate isomerase OS=Saccharomyces cerevisiae (strain ATCC 204508 / S288c) GN=PGI1 PE=1 SV=3	1	1	3	3	6	6.69725	2.54258	24.1432	9.70512	1.19509e-05	2.51966e-05	3.8431	3.40979e-09	2.44021e-10	3.25455e-09	WT - Control	limma	1.19509e-05	2.51966e-05	TRUE	enriched hit	6.69725
CHD1	P32657	Chromo domain-containing protein 1 OS=Saccharomyces cerevisiae (strain ATCC 204508 / S288c) GN=CHD1 PE=1 SV=1	1	1	3	3	13	6.65024	2.32934	24.0689	9.70077	1.19902e-05	2.52093e-05	3.83965	3.46507e-09	2.47676e-10	3.25455e-09	WT - Control	limma	1.19902e-05	2.52093e-05	TRUE	enriched hit	6.65024
MSY1	P48527	Tyrosine--tRNA ligase, mitochondrial OS=Saccharomyces cerevisiae (strain ATCC 204508 / S288c) GN=MSY1 PE=1 SV=1	1	1	3	3	4	6.11151	2.89072	22.3111	9.68133	1.21675e-05	2.54487e-05	3.8242	3.72292e-09	2.64608e-10	3.25455e-09	WT - Control	limma	1.21675e-05	2.54487e-05	TRUE	enriched hit	6.11151
PRE7	P23724	Proteasome subunit beta type-6 OS=Saccharomyces cerevisiae (strain ATCC 204508 / S288c) GN=PRE7 PE=1 SV=1	1	1	3	3	3	5.76271	1.72558	21.6601	9.67821	1.21962e-05	2.54487e-05	3.82171	3.76606e-09	2.67422e-10	3.25455e-09	WT - Control	limma	1.21962e-05	2.54487e-05	TRUE	enriched hit	5.76271
GTT3	P39996	Glutathione transferase 3 OS=Saccharomyces cerevisiae (strain ATCC 204508 / S288c) GN=GTT3 PE=1 SV=1	1	1	3	3	2	5.62789	2.92121	20.1251	9.67355	1.22393e-05	2.54487e-05	3.818	3.83133e-09	2.7167e-10	3.25455e-09	WT - Control	limma	1.22393e-05	2.54487e-05	TRUE	enriched hit	5.62789
MSD1	P15179	Aspartate--tRNA ligase, mitochondrial OS=Saccharomyces cerevisiae (strain ATCC 204508 / S288c) GN=MSD1 PE=1 SV=1	1	1	3	3	4	5.80819	2.27264	21.6765	9.67203	1.22533e-05	2.54487e-05	3.81679	3.85278e-09	2.73063e-10	3.25455e-09	WT - Control	limma	1.22533e-05	2.54487e-05	TRUE	enriched hit	5.80819
RIM1	P32445	Single-stranded DNA-binding protein RIM1, mitochondrial OS=Saccharomyces cerevisiae (strain ATCC 204508 / S288c) GN=RIM1 PE=1 SV=1	1	1	3	3	3	6.999	4.08509	22.2647	9.66992	1.22729e-05	2.54487e-05	3.81511	3.88293e-09	2.7502e-10	3.25455e-09	WT - Control	limma	1.22729e-05	2.54487e-05	TRUE	enriched hit	6.999
VAS1	P07806|P07806-2	Valine--tRNA ligase, mitochondrial OS=Saccharomyces cerevisiae (strain ATCC 204508 / S288c) GN=VAS1 PE=1 SV=2|Isoform Cytoplasmic of Valine--tRNA ligase, mitochondrial OS=Saccharomyces cerevisiae (strain ATCC 204508 / S288c) GN=VAS1	1	1	3	3	7	6.18446	1.89053	22.9614	9.66645	1.23052e-05	2.54487e-05	3.81234	3.93293e-09	2.78258e-10	4.46682e-09	WT - Control	limma	1.23052e-05	2.54487e-05	TRUE	enriched hit	6.18446
ADE17	P38009	Bifunctional purine biosynthesis protein ADE17 OS=Saccharomyces cerevisiae (strain ATCC 204508 / S288c) GN=ADE17 PE=1 SV=2	1	1	3	3	5	6.30496	2.3338	22.8656	9.62192	1.27277e-05	2.6203e-05	3.77678	4.63221e-09	3.24143e-10	4.46682e-09	WT - Control	limma	1.27277e-05	2.6203e-05	TRUE	enriched hit	6.30496
POX1	P13711	Acyl-coenzyme A oxidase OS=Saccharomyces cerevisiae (strain ATCC 204508 / S288c) GN=POX1 PE=3 SV=2	1	1	3	3	11	6.90731	2.61089	24.0314	9.62075	1.2739e-05	2.6203e-05	3.77584	4.65214e-09	3.25436e-10	4.46682e-09	WT - Control	limma	1.2739e-05	2.6203e-05	TRUE	enriched hit	6.90731
SPT16	P32558	FACT complex subunit SPT16 OS=Saccharomyces cerevisiae (strain ATCC 204508 / S288c) GN=SPT16 PE=1 SV=1	1	1	3	3	10	6.99573	2.75114	23.2468	9.61685	1.27768e-05	2.62098e-05	3.77272	4.71913e-09	3.29777e-10	4.46682e-09	WT - Control	limma	1.27768e-05	2.62098e-05	TRUE	enriched hit	6.99573
RPL43A|RPL43B	P0CX25|P0CX26	60S ribosomal protein L43-A OS=Saccharomyces cerevisiae (strain ATCC 204508 / S288c) GN=RPL43A PE=1 SV=1|60S ribosomal protein L43-B OS=Saccharomyces cerevisiae (strain ATCC 204508 / S288c) GN=RPL43B PE=1 SV=1	1	1	3	3	4	7.54902	2.93363	24.0305	9.59782	1.29631e-05	2.65202e-05	3.75746	5.05975e-09	3.51705e-10	4.46682e-09	WT - Control	limma	1.29631e-05	2.65202e-05	TRUE	enriched hit	7.54902
CKA2	P19454	Casein kinase II subunit alpha' OS=Saccharomyces cerevisiae (strain ATCC 204508 / S288c) GN=CKA2 PE=1 SV=2	1	1	3	3	4	7.02722	1.74437	22.4464	9.59251	1.30156e-05	2.65361e-05	3.7532	5.15899e-09	3.5805e-10	4.46682e-09	WT - Control	limma	1.30156e-05	2.65361e-05	TRUE	enriched hit	7.02722
DLD1	P32891	D-lactate dehydrogenase [cytochrome] 1, mitochondrial OS=Saccharomyces cerevisiae (strain ATCC 204508 / S288c) GN=DLD1 PE=1 SV=2	1	1	3	3	4	6.24852	1.8811	22.352	9.58829	1.30576e-05	2.65361e-05	3.74981	5.23919e-09	3.63164e-10	4.46682e-09	WT - Control	limma	1.30576e-05	2.65361e-05	TRUE	enriched hit	6.24852
ADR1	P07248	Regulatory protein ADR1 OS=Saccharomyces cerevisiae (strain ATCC 204508 / S288c) GN=ADR1 PE=1 SV=2	1	1	3	3	5	6.71073	3.7337	23.2047	9.58646	1.30758e-05	2.65361e-05	3.74834	5.27432e-09	3.654e-10	4.46682e-09	WT - Control	limma	1.30758e-05	2.65361e-05	TRUE	enriched hit	6.71073
MDM38	Q08179	Mitochondrial distribution and morphology protein 38 OS=Saccharomyces cerevisiae (strain ATCC 204508 / S288c) GN=MDM38 PE=1 SV=1	1	1	3	3	2	5.76009	1.71622	22.0686	9.58231	1.31172e-05	2.65492e-05	3.74501	5.35492e-09	3.7052e-10	4.46682e-09	WT - Control	limma	1.31172e-05	2.65492e-05	TRUE	enriched hit	5.76009
NOP7	P53261	Pescadillo homolog OS=Saccharomyces cerevisiae (strain ATCC 204508 / S288c) GN=NOP7 PE=1 SV=1	1	1	3	3	5	6.47535	2.55639	22.9311	9.56808	1.32603e-05	2.67675e-05	3.73357	5.64038e-09	3.88554e-10	4.46682e-09	WT - Control	limma	1.32603e-05	2.67675e-05	TRUE	enriched hit	6.47535
TES1	P41903	Peroxisomal acyl-coenzyme A thioester hydrolase 1 OS=Saccharomyces cerevisiae (strain ATCC 204508 / S288c) GN=TES1 PE=1 SV=1	1	1	3	3	4	6.27508	2.21919	22.4907	9.56306	1.33113e-05	2.67991e-05	3.72952	5.74466e-09	3.95102e-10	4.46682e-09	WT - Control	limma	1.33113e-05	2.67991e-05	TRUE	enriched hit	6.27508
MAK21	Q12176	Ribosome biogenesis protein MAK21 OS=Saccharomyces cerevisiae (strain ATCC 204508 / S288c) GN=MAK21 PE=1 SV=1	1	1	3	3	4	5.83667	2.16762	22.2587	9.55924	1.33502e-05	2.68063e-05	3.72645	5.82524e-09	4.00148e-10	5.23243e-09	WT - Control	limma	1.33502e-05	2.68063e-05	TRUE	enriched hit	5.83667
PSA1	P41940	Mannose-1-phosphate guanyltransferase OS=Saccharomyces cerevisiae (strain ATCC 204508 / S288c) GN=PSA1 PE=1 SV=2	1	1	3	3	4	6.58721	2.14918	23.7438	9.5458	1.34881e-05	2.70117e-05	3.71561	6.11754e-09	4.1862e-10	5.23243e-09	WT - Control	limma	1.34881e-05	2.70117e-05	TRUE	enriched hit	6.58721
RPS4A|RPS4B	P0CX35|P0CX36	40S ribosomal protein S4-A OS=Saccharomyces cerevisiae (strain ATCC 204508 / S288c) GN=RPS4A PE=1 SV=1|40S ribosomal protein S4-B OS=Saccharomyces cerevisiae (strain ATCC 204508 / S288c) GN=RPS4B PE=1 SV=1	1	1	3	3	15	8.13966	3.06708	26.7579	9.52225	1.37335e-05	2.74308e-05	3.6966	6.66437e-09	4.52801e-10	5.23243e-09	WT - Control	limma	1.37335e-05	2.74308e-05	TRUE	enriched hit	8.13966
YNL247W	P53852	Cysteine--tRNA ligase OS=Saccharomyces cerevisiae (strain ATCC 204508 / S288c) GN=YNL247W PE=1 SV=1	1	1	3	3	11	6.51332	2.46442	24.0107	9.50597	1.3906e-05	2.77024e-05	3.68343	7.0697e-09	4.77826e-10	5.23243e-09	WT - Control	limma	1.3906e-05	2.77024e-05	TRUE	enriched hit	6.51332
MCK1	P21965	Protein kinase MCK1 OS=Saccharomyces cerevisiae (strain ATCC 204508 / S288c) GN=MCK1 PE=1 SV=1	1	1	3	3	2	6.20975	2.30859	21.2421	9.49577	1.40154e-05	2.77859e-05	3.67516	7.33607e-09	4.94129e-10	5.23243e-09	WT - Control	limma	1.40154e-05	2.77859e-05	TRUE	enriched hit	6.20975
AMD1	P15274	AMP deaminase OS=Saccharomyces cerevisiae (strain ATCC 204508 / S288c) GN=AMD1 PE=1 SV=2	1	1	3	3	9	6.12388	2.08046	23.4961	9.49109	1.40658e-05	2.77859e-05	3.67137	7.46134e-09	5.01757e-10	5.23243e-09	WT - Control	limma	1.40658e-05	2.77859e-05	TRUE	enriched hit	6.12388
VTC4	P47075	Vacuolar transporter chaperone 4 OS=Saccharomyces cerevisiae (strain ATCC 204508 / S288c) GN=VTC4 PE=1 SV=2	1	1	3	3	3	5.68955	2.14338	20.8721	9.48945	1.40836e-05	2.77859e-05	3.67004	7.50581e-09	5.0446e-10	5.23243e-09	WT - Control	limma	1.40836e-05	2.77859e-05	TRUE	enriched hit	5.68955
SMC6	Q12749	Structural maintenance of chromosomes protein 6 OS=Saccharomyces cerevisiae (strain ATCC 204508 / S288c) GN=SMC6 PE=1 SV=1	1	1	3	3	2	5.66169	2.55623	21.3323	9.48846	1.40943e-05	2.77859e-05	3.66924	7.53269e-09	5.06092e-10	5.23243e-09	WT - Control	limma	1.40943e-05	2.77859e-05	TRUE	enriched hit	5.66169
VMA13	P41807	V-type proton ATPase subunit H OS=Saccharomyces cerevisiae (strain ATCC 204508 / S288c) GN=VMA13 PE=1 SV=1	1	1	3	3	2	5.55877	1.76855	20.6433	9.48292	1.41545e-05	2.78068e-05	3.66474	7.68527e-09	5.15333e-10	5.23243e-09	WT - Control	limma	1.41545e-05	2.78068e-05	TRUE	enriched hit	5.55877
RPA190	P10964	DNA-directed RNA polymerase I subunit RPA190 OS=Saccharomyces cerevisiae (strain ATCC 204508 / S288c) GN=RPA190 PE=1 SV=2	1	1	3	3	4	5.75393	2.54024	21.2531	9.47901	1.41972e-05	2.78068e-05	3.66156	7.79484e-09	5.21948e-10	5.23243e-09	WT - Control	limma	1.41972e-05	2.78068e-05	TRUE	enriched hit	5.75393
MRPL16	P38064	54S ribosomal protein L16, mitochondrial OS=Saccharomyces cerevisiae (strain ATCC 204508 / S288c) GN=MRPL16 PE=1 SV=1	1	1	3	3	4	6.47882	3.02049	22.4884	9.47739	1.42148e-05	2.78068e-05	3.66026	7.84038e-09	5.24691e-10	5.99166e-09	WT - Control	limma	1.42148e-05	2.78068e-05	TRUE	enriched hit	6.47882
MET6	P05694	5-methyltetrahydropteroyltriglutamate--homocysteine methyltransferase OS=Saccharomyces cerevisiae (strain ATCC 204508 / S288c) GN=MET6 PE=1 SV=4	1	1	3	3	3	5.60382	2.05466	21.3124	9.46419	1.43601e-05	2.80036e-05	3.64952	8.22358e-09	5.4799e-10	5.99166e-09	WT - Control	limma	1.43601e-05	2.80036e-05	TRUE	enriched hit	5.60382
CRZ1	P53968	Transcriptional regulator CRZ1 OS=Saccharomyces cerevisiae (strain ATCC 204508 / S288c) GN=CRZ1 PE=1 SV=1	1	1	3	3	2	6.65709	3.31798	22.1273	9.46156	1.43892e-05	2.80036e-05	3.64739	8.30189e-09	5.52727e-10	8.78045e-09	WT - Control	limma	1.43892e-05	2.80036e-05	TRUE	enriched hit	6.65709
KIN1	P13185	Serine/threonine protein kinase KIN1 OS=Saccharomyces cerevisiae (strain ATCC 204508 / S288c) GN=KIN1 PE=1 SV=3	1	1	3	3	2	5.40693	2.30646	18.9939	9.45049	1.45125e-05	2.81714e-05	3.63838	8.64004e-09	5.7377e-10	1.02103e-08	WT - Control	limma	1.45125e-05	2.81714e-05	TRUE	enriched hit	5.40693
RPL27A|RPL27B	P0C2H6|P0C2H7	60S ribosomal protein L27-A OS=Saccharomyces cerevisiae (strain ATCC 204508 / S288c) GN=RPL27A PE=1 SV=1|60S ribosomal protein L27-B OS=Saccharomyces cerevisiae (strain ATCC 204508 / S288c) GN=RPL27B PE=1 SV=1	1	1	3	3	5	7.39931	3.16066	24.4895	9.42937	1.47512e-05	2.85566e-05	3.62117	9.32307e-09	6.1639e-10	1.02103e-08	WT - Control	limma	1.47512e-05	2.85566e-05	TRUE	enriched hit	7.39931
MDJ1	P35191	DnaJ homolog 1, mitochondrial OS=Saccharomyces cerevisiae (strain ATCC 204508 / S288c) GN=MDJ1 PE=1 SV=1	1	1	3	3	3	6.23831	1.81662	22.5533	9.4263	1.47862e-05	2.85566e-05	3.61866	9.42649e-09	6.2281e-10	1.03332e-08	WT - Control	limma	1.47862e-05	2.85566e-05	TRUE	enriched hit	6.23831
RSA4	P25382	Ribosome assembly protein 4 OS=Saccharomyces cerevisiae (strain ATCC 204508 / S288c) GN=RSA4 PE=1 SV=3	1	1	3	3	2	5.84765	2.60797	21.4407	9.39754	1.51192e-05	2.9058e-05	3.59515	1.04524e-08	6.86092e-10	1.03332e-08	WT - Control	limma	1.51192e-05	2.9058e-05	TRUE	enriched hit	5.84765
PFK2	P16862	ATP-dependent 6-phosphofructokinase subunit beta OS=Saccharomyces cerevisiae (strain ATCC 204508 / S288c) GN=PFK2 PE=1 SV=4	1	1	3	3	8	6.32436	2.27401	23.3674	9.39726	1.51224e-05	2.9058e-05	3.59493	1.04627e-08	6.86725e-10	1.03332e-08	WT - Control	limma	1.51224e-05	2.9058e-05	TRUE	enriched hit	6.32436
TOP1	P04786	DNA topoisomerase 1 OS=Saccharomyces cerevisiae (strain ATCC 204508 / S288c) GN=TOP1 PE=1 SV=2	1	1	3	3	10	6.67824	2.49184	24.0802	9.39309	1.51714e-05	2.90785e-05	3.59151	1.06204e-08	6.96374e-10	1.15842e-08	WT - Control	limma	1.51714e-05	2.90785e-05	TRUE	enriched hit	6.67824
ERG27	Q12452	3-keto-steroid reductase OS=Saccharomyces cerevisiae (strain ATCC 204508 / S288c) GN=ERG27 PE=1 SV=1	1	1	3	3	3	6.04318	1.78013	21.9014	9.36725	1.54788e-05	2.9593e-05	3.57033	1.16497e-08	7.5944e-10	1.15842e-08	WT - Control	limma	1.54788e-05	2.9593e-05	TRUE	enriched hit	6.04318
PRB1	P09232	Cerevisin OS=Saccharomyces cerevisiae (strain ATCC 204508 / S288c) GN=PRB1 PE=1 SV=1	1	1	3	3	5	6.27062	1.84273	22.5447	9.35378	1.56419e-05	2.98297e-05	3.55926	1.22242e-08	7.94328e-10	1.15842e-08	WT - Control	limma	1.56419e-05	2.98297e-05	TRUE	enriched hit	6.27062
STE24	P47154	CAAX prenyl protease 1 OS=Saccharomyces cerevisiae (strain ATCC 204508 / S288c) GN=STE24 PE=1 SV=1	1	1	3	3	2	5.81539	2.49421	20.7221	9.33967	1.58147e-05	3.00407e-05	3.54766	1.28551e-08	8.32375e-10	1.15842e-08	WT - Control	limma	1.58147e-05	3.00407e-05	TRUE	enriched hit	5.81539
GPT2	P36148	Glycerol-3-phosphate O-acyltransferase 2 OS=Saccharomyces cerevisiae (strain ATCC 204508 / S288c) GN=GPT2 PE=1 SV=1	1	1	3	3	4	5.63711	2.44248	21.457	9.3367	1.58513e-05	3.00407e-05	3.54521	1.29919e-08	8.40592e-10	1.15842e-08	WT - Control	limma	1.58513e-05	3.00407e-05	TRUE	enriched hit	5.63711
OLE1	P21147	Acyl-CoA desaturase 1 OS=Saccharomyces cerevisiae (strain ATCC 204508 / S288c) GN=OLE1 PE=1 SV=2	1	1	3	3	4	6.2089	2.14994	21.4831	9.33508	1.58713e-05	3.00407e-05	3.54388	1.3067e-08	8.45098e-10	1.15842e-08	WT - Control	limma	1.58713e-05	3.00407e-05	TRUE	enriched hit	6.2089
TAF1	P46677	Transcription initiation factor TFIID subunit 1 OS=Saccharomyces cerevisiae (strain ATCC 204508 / S288c) GN=TAF1 PE=1 SV=1	1	1	3	3	7	6.14189	1.86385	23.1014	9.31974	1.60624e-05	3.03268e-05	3.53123	1.38008e-08	8.8891e-10	1.15842e-08	WT - Control	limma	1.60624e-05	3.03268e-05	TRUE	enriched hit	6.14189
RPP0	P05317	60S acidic ribosomal protein P0 OS=Saccharomyces cerevisiae (strain ATCC 204508 / S288c) GN=RPP0 PE=1 SV=2	1	1	3	3	11	7.98007	2.69468	25.9675	9.3165	1.61031e-05	3.03282e-05	3.52856	1.39609e-08	8.98426e-10	1.15842e-08	WT - Control	limma	1.61031e-05	3.03282e-05	TRUE	enriched hit	7.98007
YGR130C	P53278	Uncharacterized protein YGR130C OS=Saccharomyces cerevisiae (strain ATCC 204508 / S288c) GN=YGR130C PE=1 SV=1	1	1	3	3	2	6.21994	2.42171	22.1814	9.31193	1.61607e-05	3.03612e-05	3.52479	1.41895e-08	9.11975e-10	1.21781e-08	WT - Control	limma	1.61607e-05	3.03612e-05	TRUE	enriched hit	6.21994
RPL7A	P05737	60S ribosomal protein L7-A OS=Saccharomyces cerevisiae (strain ATCC 204508 / S288c) GN=RPL7A PE=1 SV=3	1	1	3	3	11	8.51869	3.86088	25.6381	9.3006	1.63044e-05	3.05557e-05	3.51543	1.47724e-08	9.46532e-10	1.21781e-08	WT - Control	limma	1.63044e-05	3.05557e-05	TRUE	enriched hit	8.51869
RPN3	P40016	26S proteasome regulatory subunit RPN3 OS=Saccharomyces cerevisiae (strain ATCC 204508 / S288c) GN=RPN3 PE=1 SV=5	1	1	3	3	2	5.9557	2.19214	20.9951	9.28257	1.65362e-05	3.08416e-05	3.50051	1.57484e-08	1.00391e-09	1.21781e-08	WT - Control	limma	1.65362e-05	3.08416e-05	TRUE	enriched hit	5.9557
TIF5	P38431|P38431-2	Eukaryotic translation initiation factor 5 OS=Saccharomyces cerevisiae (strain ATCC 204508 / S288c) GN=TIF5 PE=1 SV=1|Isoform Short of Eukaryotic translation initiation factor 5 OS=Saccharomyces cerevisiae (strain ATCC 204508 / S288c) GN=TIF5	1	1	3	3	5	6.14062	2.06995	21.8832	9.28241	1.65383e-05	3.08416e-05	3.50038	1.57574e-08	1.00443e-09	1.21781e-08	WT - Control	limma	1.65383e-05	3.08416e-05	TRUE	enriched hit	6.14062
DEF1	P35732	RNA polymerase II degradation factor 1 OS=Saccharomyces cerevisiae (strain ATCC 204508 / S288c) GN=DEF1 PE=1 SV=1	1	1	3	3	4	6.68815	1.84825	24.0127	9.27694	1.66092e-05	3.0898e-05	3.49585	1.60655e-08	1.02243e-09	1.90803e-08	WT - Control	limma	1.66092e-05	3.0898e-05	TRUE	enriched hit	6.68815
RPL16B	P26785	60S ribosomal protein L16-B OS=Saccharomyces cerevisiae (strain ATCC 204508 / S288c) GN=RPL16B PE=1 SV=3	1	1	3	3	9	8.13237	2.62295	25.1711	9.2585	1.68513e-05	3.12717e-05	3.48056	1.71493e-08	1.08747e-09	1.90803e-08	WT - Control	limma	1.68513e-05	3.12717e-05	TRUE	enriched hit	8.13237
SEC27	P41811	Coatomer subunit beta' OS=Saccharomyces cerevisiae (strain ATCC 204508 / S288c) GN=SEC27 PE=1 SV=1	1	1	3	3	4	5.82776	1.90366	21.4853	9.2428	1.70604e-05	3.15826e-05	3.46752	1.81275e-08	1.14577e-09	1.90803e-08	WT - Control	limma	1.70604e-05	3.15826e-05	TRUE	enriched hit	5.82776
DST1	P07273	Transcription elongation factor S-II OS=Saccharomyces cerevisiae (strain ATCC 204508 / S288c) GN=DST1 PE=1 SV=4	1	1	3	3	7	6.8048	2.7696	23.7275	9.233	1.71924e-05	3.17494e-05	3.45937	1.8765e-08	1.18357e-09	1.90803e-08	WT - Control	limma	1.71924e-05	3.17494e-05	TRUE	enriched hit	6.8048
CRP1	P38845	Cruciform DNA-recognizing protein 1 OS=Saccharomyces cerevisiae (strain ATCC 204508 / S288c) GN=CRP1 PE=1 SV=1	1	1	3	3	4	6.32746	3.31244	22.0423	9.22522	1.72981e-05	3.18671e-05	3.45289	1.92872e-08	1.21441e-09	1.90803e-08	WT - Control	limma	1.72981e-05	3.18671e-05	TRUE	enriched hit	6.32746
NIC96	P34077	Nucleoporin NIC96 OS=Saccharomyces cerevisiae (strain ATCC 204508 / S288c) GN=NIC96 PE=1 SV=2	1	1	3	3	5	5.84957	1.79771	22.3683	9.21864	1.7388e-05	3.19552e-05	3.44741	1.97396e-08	1.24105e-09	1.91985e-08	WT - Control	limma	1.7388e-05	3.19552e-05	TRUE	enriched hit	5.84957
NPL6	P32832	Chromatin structure-remodeling complex subunit RSC7 OS=Saccharomyces cerevisiae (strain ATCC 204508 / S288c) GN=NPL6 PE=1 SV=1	1	1	3	3	6	5.79328	2.30615	21.9395	9.20553	1.75686e-05	3.22092e-05	3.43648	2.06716e-08	1.29568e-09	1.91985e-08	WT - Control	limma	1.75686e-05	3.22092e-05	TRUE	enriched hit	5.79328
RPT3	P33298	26S protease regulatory subunit 6B homolog OS=Saccharomyces cerevisiae (strain ATCC 204508 / S288c) GN=RPT3 PE=1 SV=2	1	1	3	3	4	6.19944	2.54359	22.3434	9.19396	1.77298e-05	3.24263e-05	3.42682	2.15295e-08	1.34569e-09	1.91985e-08	WT - Control	limma	1.77298e-05	3.24263e-05	TRUE	enriched hit	6.19944
STH1	P32597	Nuclear protein STH1/NPS1 OS=Saccharomyces cerevisiae (strain ATCC 204508 / S288c) GN=STH1 PE=1 SV=1	1	1	3	3	9	6.07902	1.65036	23.3603	9.18835	1.78085e-05	3.2492e-05	3.42213	2.19578e-08	1.37055e-09	2.42782e-08	WT - Control	limma	1.78085e-05	3.2492e-05	TRUE	enriched hit	6.07902
RRP5	Q05022	rRNA biogenesis protein RRP5 OS=Saccharomyces cerevisiae (strain ATCC 204508 / S288c) GN=RRP5 PE=1 SV=1	1	1	3	3	6	6.09207	1.93362	22.6398	9.17646	1.79767e-05	3.27201e-05	3.41219	2.28928e-08	1.42548e-09	2.47541e-08	WT - Control	limma	1.79767e-05	3.27201e-05	TRUE	enriched hit	6.09207
MRP7	P12687	54S ribosomal protein L2, mitochondrial OS=Saccharomyces cerevisiae (strain ATCC 204508 / S288c) GN=MRP7 PE=1 SV=1	1	1	3	3	4	6.23624	2.85736	21.7956	9.16193	1.81847e-05	3.30196e-05	3.40002	2.40891e-08	1.49547e-09	2.47541e-08	WT - Control	limma	1.81847e-05	3.30196e-05	TRUE	enriched hit	6.23624
PBP1	P53297	PAB1-binding protein 1 OS=Saccharomyces cerevisiae (strain ATCC 204508 / S288c) GN=PBP1 PE=1 SV=1	1	1	3	3	3	5.92016	2.11743	22.4885	9.15362	1.83048e-05	3.31583e-05	3.39306	2.47995e-08	1.53683e-09	3.52232e-08	WT - Control	limma	1.83048e-05	3.31583e-05	TRUE	enriched hit	5.92016
BRF1	P29056	Transcription factor IIIB 70 kDa subunit OS=Saccharomyces cerevisiae (strain ATCC 204508 / S288c) GN=BRF1 PE=1 SV=1	1	1	3	3	7	6.67968	4.02234	22.5794	9.12628	1.87064e-05	3.37928e-05	3.37009	2.72852e-08	1.68351e-09	3.52232e-08	WT - Control	limma	1.87064e-05	3.37928e-05	TRUE	enriched hit	6.67968
ULS1	Q08562	ATP-dependent helicase ULS1 OS=Saccharomyces cerevisiae (strain ATCC 204508 / S288c) GN=ULS1 PE=1 SV=1	1	1	3	3	3	5.84878	2.58232	21.9678	9.12374	1.87441e-05	3.37928e-05	3.36796	2.75274e-08	1.69773e-09	3.52232e-08	WT - Control	limma	1.87441e-05	3.37928e-05	TRUE	enriched hit	5.84878
PUP2	P32379	Proteasome subunit alpha type-5 OS=Saccharomyces cerevisiae (strain ATCC 204508 / S288c) GN=PUP2 PE=1 SV=2	1	1	3	3	3	5.84491	2.15398	21.5267	9.11009	1.89488e-05	3.40809e-05	3.35646	2.88691e-08	1.77631e-09	3.66734e-08	WT - Control	limma	1.89488e-05	3.40809e-05	TRUE	enriched hit	5.84491
MYO3	P36006	Myosin-3 OS=Saccharomyces cerevisiae (strain ATCC 204508 / S288c) GN=MYO3 PE=1 SV=4	1	1	3	3	4	6.0429	2.60439	22.2393	9.09276	1.92121e-05	3.44728e-05	3.34185	3.06629e-08	1.88102e-09	3.66734e-08	WT - Control	limma	1.92121e-05	3.44728e-05	TRUE	enriched hit	6.0429
CBF1	P17106	Centromere-binding protein 1 OS=Saccharomyces cerevisiae (strain ATCC 204508 / S288c) GN=CBF1 PE=1 SV=2	1	1	3	3	5	6.44167	2.71155	22.3149	9.07941	1.94179e-05	3.47599e-05	3.33057	3.21191e-08	1.96556e-09	3.66734e-08	WT - Control	limma	1.94179e-05	3.47599e-05	TRUE	enriched hit	6.44167
DUG1	P43616	Cys-Gly metallodipeptidase DUG1 OS=Saccharomyces cerevisiae (strain ATCC 204508 / S288c) GN=DUG1 PE=1 SV=1	1	1	3	3	2	5.45243	1.90935	19.177	9.07068	4.57124e-05	6.87044e-05	2.62461	3.31062e-08	2.02264e-09	4.88321e-08	WT - Control	limma	4.57124e-05	6.87044e-05	TRUE	enriched hit	5.45243
THO1	P40040	Protein THO1 OS=Saccharomyces cerevisiae (strain ATCC 204508 / S288c) GN=THO1 PE=1 SV=1	1	1	3	3	4	6.26589	1.75729	22.3019	9.04488	1.99613e-05	3.56485e-05	3.30135	3.62008e-08	2.20317e-09	4.88321e-08	WT - Control	limma	1.99613e-05	3.56485e-05	TRUE	enriched hit	6.26589
FBP1	P09201	Fructose-1,6-bisphosphatase OS=Saccharomyces cerevisiae (strain ATCC 204508 / S288c) GN=FBP1 PE=1 SV=2	1	1	3	3	6	6.21667	2.27079	22.939	9.02363	2.03043e-05	3.6176e-05	3.2833	3.89597e-08	2.36296e-09	4.88321e-08	WT - Control	limma	2.03043e-05	3.6176e-05	TRUE	enriched hit	6.21667
MRM1	P25270	rRNA methyltransferase 1, mitochondrial OS=Saccharomyces cerevisiae (strain ATCC 204508 / S288c) GN=MRM1 PE=1 SV=2	1	1	3	3	3	5.71654	2.36234	21.946	9.0138	2.04651e-05	3.63771e-05	3.27494	4.0303e-08	2.44036e-09	4.88321e-08	WT - Control	limma	2.04651e-05	3.63771e-05	TRUE	enriched hit	5.71654
MRPL32	P25348	54S ribosomal protein L32, mitochondrial OS=Saccharomyces cerevisiae (strain ATCC 204508 / S288c) GN=MRPL32 PE=1 SV=1	1	1	3	3	2	6.09913	3.12075	20.288	8.99167	2.08324e-05	3.69434e-05	3.2561	4.34938e-08	2.62318e-09	4.88321e-08	WT - Control	limma	2.08324e-05	3.69434e-05	TRUE	enriched hit	6.09913
IDP2	P41939	Isocitrate dehydrogenase [NADP] cytoplasmic OS=Saccharomyces cerevisiae (strain ATCC 204508 / S288c) GN=IDP2 PE=1 SV=2	1	1	3	3	10	6.9711	2.61246	23.7036	8.97482	2.11171e-05	3.7361e-05	3.24172	4.60875e-08	2.77074e-09	4.88321e-08	WT - Control	limma	2.11171e-05	3.7361e-05	TRUE	enriched hit	6.9711
ATP2	P00830	ATP synthase subunit beta, mitochondrial OS=Saccharomyces cerevisiae (strain ATCC 204508 / S288c) GN=ATP2 PE=1 SV=2	1	1	3	3	7	7.12508	1.95502	23.954	8.95104	2.15262e-05	3.79229e-05	3.22138	5.0004e-08	2.99177e-09	4.88321e-08	WT - Control	limma	2.15262e-05	3.79229e-05	TRUE	enriched hit	7.12508
DBP3	P20447	ATP-dependent RNA helicase DBP3 OS=Saccharomyces cerevisiae (strain ATCC 204508 / S288c) GN=DBP3 PE=1 SV=2	1	1	3	3	2	5.72842	2.27415	20.8143	8.95055	2.15346e-05	3.79229e-05	3.22097	5.00867e-08	2.99641e-09	4.88321e-08	WT - Control	limma	2.15346e-05	3.79229e-05	TRUE	enriched hit	5.72842
INO80	P53115	Putative DNA helicase INO80 OS=Saccharomyces cerevisiae (strain ATCC 204508 / S288c) GN=INO80 PE=1 SV=1	1	1	3	3	4	5.66964	2.38736	21.2624	8.94366	2.1655e-05	3.80466e-05	3.21506	5.12835e-08	3.06352e-09	4.88321e-08	WT - Control	limma	2.1655e-05	3.80466e-05	TRUE	enriched hit	5.66964
SYP1	P25623	Suppressor of yeast profilin deletion OS=Saccharomyces cerevisiae (strain ATCC 204508 / S288c) GN=SYP1 PE=1 SV=3	1	1	3	3	5	5.97748	1.67616	22.6306	8.94049	2.17104e-05	3.80559e-05	3.21235	5.18416e-08	3.09475e-09	4.88321e-08	WT - Control	limma	2.17104e-05	3.80559e-05	TRUE	enriched hit	5.97748
COX2	P00410	Cytochrome c oxidase subunit 2 OS=Saccharomyces cerevisiae (strain ATCC 204508 / S288c) GN=COX2 PE=1 SV=1	1	1	3	3	2	6.52284	1.66133	21.2243	8.92141	2.20485e-05	3.85594e-05	3.19597	5.53367e-08	3.28934e-09	4.88321e-08	WT - Control	limma	2.20485e-05	3.85594e-05	TRUE	enriched hit	6.52284
TMA22	P47089	Translation machinery-associated protein 22 OS=Saccharomyces cerevisiae (strain ATCC 204508 / S288c) GN=TMA22 PE=1 SV=1	1	1	3	3	2	6.59823	3.3628	21.2741	8.91635	2.2139e-05	3.86287e-05	3.19163	5.62999e-08	3.34267e-09	4.88321e-08	WT - Control	limma	2.2139e-05	3.86287e-05	TRUE	enriched hit	6.59823
RSM18	P40033	37S ribosomal protein RSM18, mitochondrial OS=Saccharomyces cerevisiae (strain ATCC 204508 / S288c) GN=RSM18 PE=1 SV=2	1	1	3	3	2	5.84983	1.70904	21.394	8.91054	2.22435e-05	3.8722e-05	3.18663	5.74268e-08	3.40492e-09	4.88321e-08	WT - Control	limma	2.22435e-05	3.8722e-05	TRUE	enriched hit	5.84983
PIP2	P52960	Peroxisome proliferation transcriptional regulator OS=Saccharomyces cerevisiae (strain ATCC 204508 / S288c) GN=PIP2 PE=1 SV=1	1	1	3	3	2	5.4182	2.67829	20.9458	8.9068	2.2311e-05	3.87507e-05	3.18342	5.81637e-08	3.44552e-09	4.88321e-08	WT - Control	limma	2.2311e-05	3.87507e-05	TRUE	enriched hit	5.4182
UBA1	P22515	Ubiquitin-activating enzyme E1 1 OS=Saccharomyces cerevisiae (strain ATCC 204508 / S288c) GN=UBA1 PE=1 SV=2	1	1	3	3	2	5.83929	2.29072	21.2755	8.90046	2.24262e-05	3.88618e-05	3.17796	5.94353e-08	3.51543e-09	8.08027e-08	WT - Control	limma	2.24262e-05	3.88618e-05	TRUE	enriched hit	5.83929
NOP12	Q08208	Nucleolar protein 12 OS=Saccharomyces cerevisiae (strain ATCC 204508 / S288c) GN=NOP12 PE=1 SV=1	1	1	3	3	3	6.12918	2.08921	21.5844	8.88496	2.27102e-05	3.92643e-05	3.16461	6.26542e-08	3.69711e-09	8.08027e-08	WT - Control	limma	2.27102e-05	3.92643e-05	TRUE	enriched hit	6.12918
SSD1	P24276	Protein SSD1 OS=Saccharomyces cerevisiae (strain ATCC 204508 / S288c) GN=SSD1 PE=1 SV=1	1	1	3	3	2	5.49938	3.2993	19.7517	8.86772	2.30309e-05	3.97284e-05	3.14974	6.64343e-08	3.90937e-09	8.08027e-08	WT - Control	limma	2.30309e-05	3.97284e-05	TRUE	enriched hit	5.49938
SCL1	P21243	Proteasome subunit alpha type-1 OS=Saccharomyces cerevisiae (strain ATCC 204508 / S288c) GN=SCL1 PE=1 SV=1	1	1	3	3	3	5.81822	1.65366	20.9576	8.83528	2.36484e-05	4.0701e-05	3.12168	7.41571e-08	4.33942e-09	8.08027e-08	WT - Control	limma	2.36484e-05	4.0701e-05	TRUE	enriched hit	5.81822
INO1	P11986	Inositol-3-phosphate synthase OS=Saccharomyces cerevisiae (strain ATCC 204508 / S288c) GN=INO1 PE=1 SV=3	1	1	3	3	3	5.83791	2.44197	21.7546	8.81572	2.40294e-05	4.12632e-05	3.10472	7.92231e-08	4.61892e-09	8.08027e-08	WT - Control	limma	2.40294e-05	4.12632e-05	TRUE	enriched hit	5.83791
RRP14	P36080	Ribosomal RNA-processing protein 14 OS=Saccharomyces cerevisiae (strain ATCC 204508 / S288c) GN=RRP14 PE=1 SV=1	1	1	3	3	6	5.99336	2.1955	22.6575	8.80524	2.42365e-05	4.15249e-05	3.09561	8.20761e-08	4.77543e-09	8.08027e-08	WT - Control	limma	2.42365e-05	4.15249e-05	TRUE	enriched hit	5.99336
NOP1	P15646	rRNA 2'-O-methyltransferase fibrillarin OS=Saccharomyces cerevisiae (strain ATCC 204508 / S288c) GN=NOP1 PE=1 SV=1	1	1	3	3	6	6.68986	2.51691	23.5877	8.80061	2.43286e-05	4.15888e-05	3.09159	8.33672e-08	4.84604e-09	8.08027e-08	WT - Control	limma	2.43286e-05	4.15888e-05	TRUE	enriched hit	6.68986
ERG10	P41338	Acetyl-CoA acetyltransferase OS=Saccharomyces cerevisiae (strain ATCC 204508 / S288c) GN=ERG10 PE=1 SV=3	1	1	3	3	4	6.05177	2.93289	21.3666	8.7837	2.46683e-05	4.20748e-05	3.07687	8.82533e-08	5.11209e-09	8.08027e-08	WT - Control	limma	2.46683e-05	4.20748e-05	TRUE	enriched hit	6.05177
PDS5	Q04264	Sister chromatid cohesion protein PDS5 OS=Saccharomyces cerevisiae (strain ATCC 204508 / S288c) GN=PDS5 PE=1 SV=1	1	1	3	3	9	6.26803	1.74289	23.3829	8.75749	2.52053e-05	4.28943e-05	3.05401	9.63777e-08	5.55037e-09	8.08027e-08	WT - Control	limma	2.52053e-05	4.28943e-05	TRUE	enriched hit	6.26803
SPP41	P38904	Protein SPP41 OS=Saccharomyces cerevisiae (strain ATCC 204508 / S288c) GN=SPP41 PE=1 SV=2	1	1	3	3	4	6.20451	2.70034	22.166	8.75073	2.5346e-05	4.30218e-05	3.04811	9.85878e-08	5.66873e-09	8.08027e-08	WT - Control	limma	2.5346e-05	4.30218e-05	TRUE	enriched hit	6.20451
RPN6	Q12377	26S proteasome regulatory subunit RPN6 OS=Saccharomyces cerevisiae (strain ATCC 204508 / S288c) GN=RPN6 PE=1 SV=3	1	1	3	3	2	5.75174	1.7708	20.9474	8.74805	2.5402e-05	4.30218e-05	3.04576	9.94789e-08	5.71634e-09	8.08027e-08	WT - Control	limma	2.5402e-05	4.30218e-05	TRUE	enriched hit	5.75174
RPL6A	Q02326	60S ribosomal protein L6-A OS=Saccharomyces cerevisiae (strain ATCC 204508 / S288c) GN=RPL6A PE=1 SV=2	1	1	3	3	3	6.53311	2.50879	22.0751	8.74319	2.55039e-05	4.30218e-05	3.04151	1.01112e-07	5.80343e-09	8.08027e-08	WT - Control	limma	2.55039e-05	4.30218e-05	TRUE	enriched hit	6.53311
BDH1	P39714	(R,R)-butanediol dehydrogenase OS=Saccharomyces cerevisiae (strain ATCC 204508 / S288c) GN=BDH1 PE=1 SV=2	1	1	3	3	2	6.63961	1.6817	21.8356	8.73873	2.55978e-05	4.30218e-05	3.03761	1.02634e-07	5.88446e-09	8.08027e-08	WT - Control	limma	2.55978e-05	4.30218e-05	TRUE	enriched hit	6.63961
ALD6	P54115	Magnesium-activated aldehyde dehydrogenase, cytosolic OS=Saccharomyces cerevisiae (strain ATCC 204508 / S288c) GN=ALD6 PE=1 SV=4	1	1	3	3	6	6.29411	1.72893	23.0158	8.73772	2.5619e-05	4.30218e-05	3.03673	1.0298e-07	5.90281e-09	8.08027e-08	WT - Control	limma	2.5619e-05	4.30218e-05	TRUE	enriched hit	6.29411
ARO9	P38840	Aromatic amino acid aminotransferase 2 OS=Saccharomyces cerevisiae (strain ATCC 204508 / S288c) GN=ARO9 PE=1 SV=3	1	1	3	3	5	6.60485	1.87167	22.4945	8.73766	2.56204e-05	4.30218e-05	3.03668	1.03002e-07	5.904e-09	1.2873e-07	WT - Control	limma	2.56204e-05	4.30218e-05	TRUE	enriched hit	6.60485
ZIP1	P31111	Synaptonemal complex protein ZIP1 OS=Saccharomyces cerevisiae (strain ATCC 204508 / S288c) GN=ZIP1 PE=1 SV=2	1	1	3	3	24	7.01499	2.707	25.6796	8.67	2.70946e-05	4.53496e-05	2.97726	1.29083e-07	7.31399e-09	1.2873e-07	WT - Control	limma	2.70946e-05	4.53496e-05	TRUE	enriched hit	7.01499
HPC2	Q01448	Histone promoter control protein 2 OS=Saccharomyces cerevisiae (strain ATCC 204508 / S288c) GN=HPC2 PE=1 SV=2	1	1	3	3	2	6.02713	2.51759	21.2392	8.66643	2.7175e-05	4.53496e-05	2.97411	1.30624e-07	7.39628e-09	1.2873e-07	WT - Control	limma	2.7175e-05	4.53496e-05	TRUE	enriched hit	6.02713
YNR021W	P53723	UPF0674 endoplasmic reticulum membrane protein YNR021W OS=Saccharomyces cerevisiae (strain ATCC 204508 / S288c) GN=YNR021W PE=1 SV=3	1	1	3	3	2	5.96513	2.49137	22.3422	8.66595	2.71858e-05	4.53496e-05	2.97369	1.30832e-07	7.40738e-09	1.2873e-07	WT - Control	limma	2.71858e-05	4.53496e-05	TRUE	enriched hit	5.96513
SLI15	P38283	Inner centromere protein-related protein SLI15 OS=Saccharomyces cerevisiae (strain ATCC 204508 / S288c) GN=SLI15 PE=1 SV=1	1	1	3	3	2	6.06142	1.7768	21.5627	8.65915	2.73398e-05	4.55064e-05	2.96769	1.33822e-07	7.5667e-09	1.2873e-07	WT - Control	limma	2.73398e-05	4.55064e-05	TRUE	enriched hit	6.06142
YAT2	P40017	Carnitine O-acetyltransferase YAT2 OS=Saccharomyces cerevisiae (strain ATCC 204508 / S288c) GN=YAT2 PE=1 SV=1	1	1	3	3	3	6.29633	1.85071	22.9898	8.65532	2.74269e-05	4.55287e-05	2.96431	1.35534e-07	7.65777e-09	1.2873e-07	WT - Control	limma	2.74269e-05	4.55287e-05	TRUE	enriched hit	6.29633
RPS14A|RPS14B	P06367|P39516	40S ribosomal protein S14-A OS=Saccharomyces cerevisiae (strain ATCC 204508 / S288c) GN=RPS14A PE=1 SV=5|40S ribosomal protein S14-B OS=Saccharomyces cerevisiae (strain ATCC 204508 / S288c) GN=RPS14B PE=1 SV=2	1	1	3	3	5	7.08439	1.68532	23.1098	8.65329	2.74732e-05	4.55287e-05	2.96252	1.36448e-07	7.70635e-09	1.2873e-07	WT - Control	limma	2.74732e-05	4.55287e-05	TRUE	enriched hit	7.08439
POM33	Q12164	Pore membrane protein of 33 kDa OS=Saccharomyces cerevisiae (strain ATCC 204508 / S288c) GN=POM33 PE=1 SV=1	1	1	3	3	2	6.18394	2.58258	21.2497	8.642	2.77323e-05	4.584e-05	2.95255	1.41653e-07	7.98209e-09	1.2873e-07	WT - Control	limma	2.77323e-05	4.584e-05	TRUE	enriched hit	6.18394
HIR3	P47171	Histone transcription regulator 3 OS=Saccharomyces cerevisiae (strain ATCC 204508 / S288c) GN=HIR3 PE=1 SV=1	1	1	3	3	10	6.58194	2.82189	23.6767	8.63986	2.77818e-05	4.584e-05	2.95065	1.42664e-07	8.03547e-09	2.12365e-07	WT - Control	limma	2.77818e-05	4.584e-05	TRUE	enriched hit	6.58194
NOP58	Q12499	Nucleolar protein 58 OS=Saccharomyces cerevisiae (strain ATCC 204508 / S288c) GN=NOP58 PE=1 SV=1	1	1	3	3	11	7.38254	2.4442	25.0139	8.57774	2.926e-05	4.81742e-05	2.89556	1.75142e-07	9.78055e-09	2.12365e-07	WT - Control	limma	2.926e-05	4.81742e-05	TRUE	enriched hit	7.38254
YPK2	P18961	Serine/threonine-protein kinase YPK2/YKR2 OS=Saccharomyces cerevisiae (strain ATCC 204508 / S288c) GN=YPK2 PE=1 SV=1	1	1	3	3	3	5.64063	2.30389	21.4553	8.56009	2.96959e-05	4.8786e-05	2.87984	1.85606e-07	1.03365e-08	2.12365e-07	WT - Control	limma	2.96959e-05	4.8786e-05	TRUE	enriched hit	5.64063
GCV2	P49095	Glycine dehydrogenase (decarboxylating), mitochondrial OS=Saccharomyces cerevisiae (strain ATCC 204508 / S288c) GN=GCV2 PE=1 SV=1	1	1	3	3	5	5.74985	2.00751	22.0907	8.5332	3.03738e-05	4.97278e-05	2.85584	2.02717e-07	1.12389e-08	2.12365e-07	WT - Control	limma	3.03738e-05	4.97278e-05	TRUE	enriched hit	5.74985
IPI3	P53877	Pre-rRNA-processing protein IPI3 OS=Saccharomyces cerevisiae (strain ATCC 204508 / S288c) GN=IPI3 PE=1 SV=1	1	1	3	3	2	5.62823	2.17579	19.8989	8.53217	3.04002e-05	4.97278e-05	2.85492	2.03402e-07	1.12749e-08	2.12365e-07	WT - Control	limma	3.04002e-05	4.97278e-05	TRUE	enriched hit	5.62823
GLR1	P41921|P41921-2	Glutathione reductase OS=Saccharomyces cerevisiae (strain ATCC 204508 / S288c) GN=GLR1 PE=1 SV=2|Isoform 2 of Glutathione reductase OS=Saccharomyces cerevisiae (strain ATCC 204508 / S288c) GN=GLR1	1	1	3	3	3	5.38695	1.88068	21.3719	8.52614	3.05548e-05	4.98381e-05	2.84953	2.07458e-07	1.14876e-08	2.12365e-07	WT - Control	limma	3.05548e-05	4.98381e-05	TRUE	enriched hit	5.38695
NTO1	Q12311	NuA3 HAT complex component NTO1 OS=Saccharomyces cerevisiae (strain ATCC 204508 / S288c) GN=NTO1 PE=1 SV=1	1	1	3	3	10	6.97609	3.82604	24.1277	8.52442	3.05989e-05	4.98381e-05	2.84799	2.08626e-07	1.15487e-08	2.12365e-07	WT - Control	limma	3.05989e-05	4.98381e-05	TRUE	enriched hit	6.97609
SDH2	P21801	Succinate dehydrogenase [ubiquinone] iron-sulfur subunit, mitochondrial OS=Saccharomyces cerevisiae (strain ATCC 204508 / S288c) GN=SDH2 PE=1 SV=1	1	1	3	3	5	6.37807	2.03512	22.4874	8.52104	3.06861e-05	4.98731e-05	2.84496	2.10947e-07	1.16701e-08	2.12365e-07	WT - Control	limma	3.06861e-05	4.98731e-05	TRUE	enriched hit	6.37807
ARD1	P07347	N-terminal acetyltransferase A complex catalytic subunit ARD1 OS=Saccharomyces cerevisiae (strain ATCC 204508 / S288c) GN=ARD1 PE=1 SV=2	1	1	3	3	2	5.75496	1.97101	20.1272	8.48666	3.15886e-05	5.11451e-05	2.81414	2.36002e-07	1.29716e-08	2.12365e-07	WT - Control	limma	3.15886e-05	5.11451e-05	TRUE	enriched hit	5.75496
PRO3	P32263	Pyrroline-5-carboxylate reductase OS=Saccharomyces cerevisiae (strain ATCC 204508 / S288c) GN=PRO3 PE=1 SV=1	1	1	3	3	3	5.62514	1.93489	21.1964	8.4861	3.16035e-05	5.11451e-05	2.81364	2.36431e-07	1.29937e-08	2.12365e-07	WT - Control	limma	3.16035e-05	5.11451e-05	TRUE	enriched hit	5.62514
MYO2	P19524	Myosin-2 OS=Saccharomyces cerevisiae (strain ATCC 204508 / S288c) GN=MYO2 PE=1 SV=1	1	1	3	3	5	6.09996	1.80927	23.0525	8.47744	3.18356e-05	5.13864e-05	2.80585	2.43194e-07	1.33421e-08	2.12365e-07	WT - Control	limma	3.18356e-05	5.13864e-05	TRUE	enriched hit	6.09996
NIP1	P32497	Eukaryotic translation initiation factor 3 subunit C OS=Saccharomyces cerevisiae (strain ATCC 204508 / S288c) GN=NIP1 PE=1 SV=2	1	1	3	3	4	6.16347	2.45007	21.418	8.47367	3.19372e-05	5.13864e-05	2.80246	2.46196e-07	1.34963e-08	2.12365e-07	WT - Control	limma	3.19372e-05	5.13864e-05	TRUE	enriched hit	6.16347
COP1	P53622	Coatomer subunit alpha OS=Saccharomyces cerevisiae (strain ATCC 204508 / S288c) GN=COP1 PE=1 SV=2	1	1	3	3	5	5.94089	1.61528	22.0098	8.47298	3.19557e-05	5.13864e-05	2.80184	2.46745e-07	1.35245e-08	2.12365e-07	WT - Control	limma	3.19557e-05	5.13864e-05	TRUE	enriched hit	5.94089
EPL1	P43572	Enhancer of polycomb-like protein 1 OS=Saccharomyces cerevisiae (strain ATCC 204508 / S288c) GN=EPL1 PE=1 SV=1	1	1	3	3	5	5.78083	2.25973	21.9016	8.4702	3.2031e-05	5.13985e-05	2.79934	2.48987e-07	1.36395e-08	4.33827e-07	WT - Control	limma	3.2031e-05	5.13985e-05	TRUE	enriched hit	5.78083
MIS1	P09440	C-1-tetrahydrofolate synthase, mitochondrial OS=Saccharomyces cerevisiae (strain ATCC 204508 / S288c) GN=MIS1 PE=1 SV=1	1	1	3	3	5	6.31649	2.7149	23.1132	8.42536	3.32719e-05	5.32772e-05	2.7589	2.87976e-07	1.5698e-08	4.33827e-07	WT - Control	limma	3.32719e-05	5.32772e-05	TRUE	enriched hit	6.31649
ADE5,7	P07244	Bifunctional purine biosynthetic protein ADE5,7 OS=Saccharomyces cerevisiae (strain ATCC 204508 / S288c) GN=ADE5,7 PE=1 SV=1	1	1	3	3	5	5.98005	1.73468	22.8413	8.40752	3.37804e-05	5.39775e-05	2.74276	3.0507e-07	1.65942e-08	4.33827e-07	WT - Control	limma	3.37804e-05	5.39775e-05	TRUE	enriched hit	5.98005
IMD4	P50094	Inosine-5'-monophosphate dehydrogenase 4 OS=Saccharomyces cerevisiae (strain ATCC 204508 / S288c) GN=IMD4 PE=1 SV=1	1	1	3	3	3	6.03276	2.29074	21.0601	8.36415	3.5053e-05	5.58934e-05	2.70339	3.50814e-07	1.89735e-08	4.33827e-07	WT - Control	limma	3.5053e-05	5.58934e-05	TRUE	enriched hit	6.03276
MVD1	P32377	Diphosphomevalonate decarboxylase OS=Saccharomyces cerevisiae (strain ATCC 204508 / S288c) GN=MVD1 PE=1 SV=2	1	1	3	3	3	5.8448	1.82043	21.4403	8.35408	3.53564e-05	5.62589e-05	2.69422	3.62358e-07	1.95697e-08	4.33827e-07	WT - Control	limma	3.53564e-05	5.62589e-05	TRUE	enriched hit	5.8448
HRK1	Q08732	Serine/threonine-protein kinase HRK1 OS=Saccharomyces cerevisiae (strain ATCC 204508 / S288c) GN=HRK1 PE=1 SV=1	1	1	3	3	3	5.94696	1.59746	21.5768	8.35066	3.54599e-05	5.63056e-05	2.6911	3.66354e-07	1.97757e-08	4.33827e-07	WT - Control	limma	3.54599e-05	5.63056e-05	TRUE	enriched hit	5.94696
GCN2	P15442	eIF-2-alpha kinase GCN2 OS=Saccharomyces cerevisiae (strain ATCC 204508 / S288c) GN=GCN2 PE=1 SV=3	1	1	3	3	2	6.09425	2.34312	21.0959	8.34703	3.55704e-05	5.6363e-05	2.68779	3.70649e-07	1.99968e-08	4.33827e-07	WT - Control	limma	3.55704e-05	5.6363e-05	TRUE	enriched hit	6.09425
PRE3	P38624	Proteasome subunit beta type-1 OS=Saccharomyces cerevisiae (strain ATCC 204508 / S288c) GN=PRE3 PE=1 SV=2	1	1	3	3	3	5.99403	1.61271	21.353	8.34135	3.57436e-05	5.65195e-05	2.68262	3.77454e-07	2.03468e-08	4.33827e-07	WT - Control	limma	3.57436e-05	5.65195e-05	TRUE	enriched hit	5.99403
SEC7	P11075	Protein transport protein SEC7 OS=Saccharomyces cerevisiae (strain ATCC 204508 / S288c) GN=SEC7 PE=1 SV=2	1	1	3	3	2	5.49783	1.63831	20.4116	8.31885	3.64399e-05	5.75009e-05	2.66207	4.05652e-07	2.17905e-08	4.33827e-07	WT - Control	limma	3.64399e-05	5.75009e-05	TRUE	enriched hit	5.49783
TIF34	P40217	Eukaryotic translation initiation factor 3 subunit I OS=Saccharomyces cerevisiae (strain ATCC 204508 / S288c) GN=TIF34 PE=1 SV=1	1	1	3	3	2	6.04386	2.47835	21.2544	8.28858	3.74008e-05	5.88946e-05	2.63436	4.46812e-07	2.38797e-08	4.33827e-07	WT - Control	limma	3.74008e-05	5.88946e-05	TRUE	enriched hit	6.04386
GLN1	P32288	Glutamine synthetase OS=Saccharomyces cerevisiae (strain ATCC 204508 / S288c) GN=GLN1 PE=1 SV=4	1	1	3	3	3	6.18833	1.76995	21.8011	8.26757	3.80841e-05	5.98465e-05	2.61507	4.77714e-07	2.54344e-08	4.33827e-07	WT - Control	limma	3.80841e-05	5.98465e-05	TRUE	enriched hit	6.18833
ENO2	P00925	Enolase 2 OS=Saccharomyces cerevisiae (strain ATCC 204508 / S288c) GN=ENO2 PE=1 SV=2	1	1	3	3	5	6.47997	1.61777	24.4305	8.24743	3.87523e-05	6.06802e-05	2.59654	5.09264e-07	2.70096e-08	4.33827e-07	WT - Control	limma	3.87523e-05	6.06802e-05	TRUE	enriched hit	6.47997
RPL19A|RPL19B	P0CX82|P0CX83	60S ribosomal protein L19-A OS=Saccharomyces cerevisiae (strain ATCC 204508 / S288c) GN=RPL19A PE=1 SV=1|60S ribosomal protein L19-B OS=Saccharomyces cerevisiae (strain ATCC 204508 / S288c) GN=RPL19B PE=1 SV=1	1	1	3	3	6	7.55915	4.52997	24.2108	8.24676	3.87745e-05	6.06802e-05	2.59593	5.10337e-07	2.7063e-08	4.33827e-07	WT - Control	limma	3.87745e-05	6.06802e-05	TRUE	enriched hit	7.55915
NAM7	P30771	ATP-dependent helicase NAM7 OS=Saccharomyces cerevisiae (strain ATCC 204508 / S288c) GN=NAM7 PE=1 SV=1	1	1	3	3	3	5.72796	2.00168	21.1563	8.24218	3.89287e-05	6.0796e-05	2.5917	5.17815e-07	2.74345e-08	4.33827e-07	WT - Control	limma	3.89287e-05	6.0796e-05	TRUE	enriched hit	5.72796
FPR3	P38911	FK506-binding nuclear protein OS=Saccharomyces cerevisiae (strain ATCC 204508 / S288c) GN=FPR3 PE=1 SV=2	1	1	3	3	3	6.23513	2.76691	23.3542	8.23736	3.90912e-05	6.09245e-05	2.58726	5.25782e-07	2.78295e-08	4.33827e-07	WT - Control	limma	3.90912e-05	6.09245e-05	TRUE	enriched hit	6.23513
GPH1	P06738	Glycogen phosphorylase OS=Saccharomyces cerevisiae (strain ATCC 204508 / S288c) GN=GPH1 PE=1 SV=4	1	1	3	3	9	6.71018	1.55102	23.7978	8.23467	3.91822e-05	6.09412e-05	2.58478	5.30276e-07	2.8052e-08	4.33827e-07	WT - Control	limma	3.91822e-05	6.09412e-05	TRUE	enriched hit	6.71018
YNL040W	P53960	Putative alanyl-tRNA editing protein alaX OS=Saccharomyces cerevisiae (strain ATCC 204508 / S288c) GN=YNL040W PE=1 SV=1	1	1	3	3	2	5.80673	1.73253	20.9513	8.21844	3.97372e-05	6.16779e-05	2.56979	5.58231e-07	2.94305e-08	4.33827e-07	WT - Control	limma	3.97372e-05	6.16779e-05	TRUE	enriched hit	5.80673
RPA49	Q01080	DNA-directed RNA polymerase I subunit RPA49 OS=Saccharomyces cerevisiae (strain ATCC 204508 / S288c) GN=RPA49 PE=1 SV=2	1	1	3	3	2	5.61892	2.46581	19.6474	8.21292	3.99278e-05	6.17997e-05	2.56469	5.68056e-07	2.99128e-08	4.33827e-07	WT - Control	limma	3.99278e-05	6.17997e-05	TRUE	enriched hit	5.61892
URA2	P07259	Protein URA2 OS=Saccharomyces cerevisiae (strain ATCC 204508 / S288c) GN=URA2 PE=1 SV=5	1	1	3	3	15	6.59485	2.70258	24.4648	8.21146	3.99785e-05	6.17997e-05	2.56334	5.70685e-07	3.00416e-08	4.33827e-07	WT - Control	limma	3.99785e-05	6.17997e-05	TRUE	enriched hit	6.59485
SRP40	P32583	Suppressor protein SRP40 OS=Saccharomyces cerevisiae (strain ATCC 204508 / S288c) GN=SRP40 PE=1 SV=2	1	1	3	3	5	6.9346	3.18321	22.7502	8.20593	4.01707e-05	6.19154e-05	2.55823	5.80735e-07	3.05335e-08	4.33827e-07	WT - Control	limma	4.01707e-05	6.19154e-05	TRUE	enriched hit	6.9346
CSE4	P36012	Histone H3-like centromeric protein CSE4 OS=Saccharomyces cerevisiae (strain ATCC 204508 / S288c) GN=CSE4 PE=1 SV=2	1	1	3	3	4	6.09099	2.46007	22.1918	8.20462	4.02164e-05	6.19154e-05	2.55702	5.83143e-07	3.06511e-08	4.8926e-07	WT - Control	limma	4.02164e-05	6.19154e-05	TRUE	enriched hit	6.09099
RML2	P32611	54S ribosomal protein RML2, mitochondrial OS=Saccharomyces cerevisiae (strain ATCC 204508 / S288c) GN=RML2 PE=1 SV=1	1	1	3	3	4	6.80724	3.57646	22.1732	8.17866	4.11341e-05	6.31999e-05	2.53297	6.32856e-07	3.30874e-08	4.8926e-07	WT - Control	limma	4.11341e-05	6.31999e-05	TRUE	enriched hit	6.80724
RNR1	P21524	Ribonucleoside-diphosphate reductase large chain 1 OS=Saccharomyces cerevisiae (strain ATCC 204508 / S288c) GN=RNR1 PE=1 SV=2	1	1	3	3	4	6.23952	2.2283	22.7924	8.16915	4.14763e-05	6.3597e-05	2.52414	6.52083e-07	3.40227e-08	4.8926e-07	WT - Control	limma	4.14763e-05	6.3597e-05	TRUE	enriched hit	6.23952
MCM4	P30665	DNA replication licensing factor MCM4 OS=Saccharomyces cerevisiae (strain ATCC 204508 / S288c) GN=MCM4 PE=1 SV=2	1	1	3	3	2	5.53034	2.62363	20.3122	8.1591	4.18411e-05	6.4027e-05	2.5148	6.72998e-07	3.50358e-08	4.8926e-07	WT - Control	limma	4.18411e-05	6.4027e-05	TRUE	enriched hit	5.53034
SAC6	P32599	Fimbrin OS=Saccharomyces cerevisiae (strain ATCC 204508 / S288c) GN=SAC6 PE=1 SV=1	1	1	3	3	2	5.77787	2.12358	20.2239	8.15376	4.20364e-05	6.41965e-05	2.50983	6.84374e-07	3.5585e-08	4.8926e-07	WT - Control	limma	4.20364e-05	6.41965e-05	TRUE	enriched hit	5.77787
PET127	P32606	Putative mitochondrial translation system component PET127 OS=Saccharomyces cerevisiae (strain ATCC 204508 / S288c) GN=PET127 PE=1 SV=2	1	1	3	3	3	5.61464	1.67535	21.8438	8.14075	4.25167e-05	6.47996e-05	2.49772	7.12879e-07	3.69552e-08	4.8926e-07	WT - Control	limma	4.25167e-05	6.47996e-05	TRUE	enriched hit	5.61464
KGD1	P20967	2-oxoglutarate dehydrogenase, mitochondrial OS=Saccharomyces cerevisiae (strain ATCC 204508 / S288c) GN=KGD1 PE=1 SV=2	1	1	3	3	6	6.61167	2.35996	23.4731	8.13307	4.28033e-05	6.50604e-05	2.49056	7.30248e-07	3.77861e-08	4.8926e-07	WT - Control	limma	4.28033e-05	6.50604e-05	TRUE	enriched hit	6.61167
MRPL3	P36516	54S ribosomal protein L3, mitochondrial OS=Saccharomyces cerevisiae (strain ATCC 204508 / S288c) GN=MRPL3 PE=1 SV=2	1	1	3	3	4	5.57792	1.66553	21.3905	8.13157	4.28593e-05	6.50604e-05	2.48916	7.33676e-07	3.79497e-08	4.8926e-07	WT - Control	limma	4.28593e-05	6.50604e-05	TRUE	enriched hit	5.57792
RPL2A|RPL2B	P0CX45|P0CX46	60S ribosomal protein L2-A OS=Saccharomyces cerevisiae (strain ATCC 204508 / S288c) GN=RPL2A PE=1 SV=1|60S ribosomal protein L2-B OS=Saccharomyces cerevisiae (strain ATCC 204508 / S288c) GN=RPL2B PE=1 SV=1	1	1	3	3	12	8.11394	3.51954	26.0258	8.12686	4.30361e-05	6.51985e-05	2.48477	7.44567e-07	3.84687e-08	4.8926e-07	WT - Control	limma	4.30361e-05	6.51985e-05	TRUE	enriched hit	8.11394
SWR1	Q05471	Helicase SWR1 OS=Saccharomyces cerevisiae (strain ATCC 204508 / S288c) GN=SWR1 PE=1 SV=1	1	1	3	3	4	5.75397	3.89299	20.5009	8.12078	4.3266e-05	6.54161e-05	2.47909	7.58875e-07	3.91488e-08	4.8926e-07	WT - Control	limma	4.3266e-05	6.54161e-05	TRUE	enriched hit	5.75397
CNM67	P53865	Chaotic nuclear migration protein 67 OS=Saccharomyces cerevisiae (strain ATCC 204508 / S288c) GN=CNM67 PE=1 SV=1	1	1	3	3	2	5.94825	2.19044	20.8107	8.11547	4.34675e-05	6.55901e-05	2.47414	7.71569e-07	3.97505e-08	1.41775e-06	WT - Control	limma	4.34675e-05	6.55901e-05	TRUE	enriched hit	5.94825
RPB11	P38902	DNA-directed RNA polymerase II subunit RPB11 OS=Saccharomyces cerevisiae (strain ATCC 204508 / S288c) GN=RPB11 PE=1 SV=1	1	1	3	3	3	6.25071	2.49479	21.426	8.08638	4.45908e-05	6.71517e-05	2.44693	8.44857e-07	4.34106e-08	1.41775e-06	WT - Control	limma	4.45908e-05	6.71517e-05	TRUE	enriched hit	6.25071
SPT7	P35177	Transcriptional activator SPT7 OS=Saccharomyces cerevisiae (strain ATCC 204508 / S288c) GN=SPT7 PE=1 SV=1	1	1	3	3	3	5.5956	2.99433	21.4277	8.03589	4.66183e-05	6.99274e-05	2.39949	9.88271e-07	5.0517e-08	1.41775e-06	WT - Control	limma	4.66183e-05	6.99274e-05	TRUE	enriched hit	5.5956
RPS13	P05756	40S ribosomal protein S13 OS=Saccharomyces cerevisiae (strain ATCC 204508 / S288c) GN=RPS13 PE=1 SV=3	1	1	3	3	4	6.93012	1.95556	22.5619	8.03344	4.67193e-05	6.99407e-05	2.39718	9.95795e-07	5.08878e-08	1.41775e-06	WT - Control	limma	4.67193e-05	6.99407e-05	TRUE	enriched hit	6.93012
RPO31	P04051	DNA-directed RNA polymerase III subunit RPC1 OS=Saccharomyces cerevisiae (strain ATCC 204508 / S288c) GN=RPO31 PE=1 SV=1	1	1	3	3	4	5.79921	2.35338	21.8341	8.02505	4.70669e-05	7.03224e-05	2.38927	1.02198e-06	5.21769e-08	1.41775e-06	WT - Control	limma	4.70669e-05	7.03224e-05	TRUE	enriched hit	5.79921
NDI1	P32340	Rotenone-insensitive NADH-ubiquinone oxidoreductase, mitochondrial OS=Saccharomyces cerevisiae (strain ATCC 204508 / S288c) GN=NDI1 PE=1 SV=1	1	1	3	3	3	6.58282	2.26437	23.8704	8.01197	4.76144e-05	7.10007e-05	2.37693	1.06413e-06	5.42462e-08	1.41775e-06	WT - Control	limma	4.76144e-05	7.10007e-05	TRUE	enriched hit	6.58282
GDB1	Q06625	Glycogen debranching enzyme OS=Saccharomyces cerevisiae (strain ATCC 204508 / S288c) GN=GDB1 PE=1 SV=1	1	1	3	3	2	5.57801	1.456	21.2337	7.99498	4.83363e-05	7.19357e-05	2.36087	1.12137e-06	5.7047e-08	1.41775e-06	WT - Control	limma	4.83363e-05	7.19357e-05	TRUE	enriched hit	5.57801
TCP1	P12612	T-complex protein 1 subunit alpha OS=Saccharomyces cerevisiae (strain ATCC 204508 / S288c) GN=TCP1 PE=1 SV=2	1	1	3	3	4	5.88602	2.10614	22.0806	7.96863	4.94802e-05	7.34941e-05	2.33591	1.21608e-06	6.16553e-08	1.41775e-06	WT - Control	limma	4.94802e-05	7.34941e-05	TRUE	enriched hit	5.88602
CRM1	P30822	Exportin-1 OS=Saccharomyces cerevisiae (strain ATCC 204508 / S288c) GN=CRM1 PE=1 SV=1	1	1	3	3	3	5.60476	1.69556	21.1857	7.96516	4.96332e-05	7.35774e-05	2.33261	1.22912e-06	6.22875e-08	1.41775e-06	WT - Control	limma	4.96332e-05	7.35774e-05	TRUE	enriched hit	5.60476
BGL2	P15703	Glucan 1,3-beta-glucosidase OS=Saccharomyces cerevisiae (strain ATCC 204508 / S288c) GN=BGL2 PE=1 SV=1	1	1	3	3	2	6.49889	1.85987	22.1416	7.93172	5.11336e-05	7.56538e-05	2.30082	1.36176e-06	6.86834e-08	1.41775e-06	WT - Control	limma	5.11336e-05	7.56538e-05	TRUE	enriched hit	6.49889
YLR278C	Q05854	Uncharacterized transcriptional regulatory protein YLR278C OS=Saccharomyces cerevisiae (strain ATCC 204508 / S288c) GN=YLR278C PE=1 SV=1	1	1	3	3	2	5.54893	2.13622	20.7992	7.92391	5.14912e-05	7.60347e-05	2.29338	1.39466e-06	7.02609e-08	1.41775e-06	WT - Control	limma	5.14912e-05	7.60347e-05	TRUE	enriched hit	5.54893
CDC10	P25342	Cell division control protein 10 OS=Saccharomyces cerevisiae (strain ATCC 204508 / S288c) GN=CDC10 PE=1 SV=1	1	1	3	3	4	6.66454	3.06894	22.5094	7.91941	5.16989e-05	7.61931e-05	2.28908	1.414e-06	7.1186e-08	1.41775e-06	WT - Control	limma	5.16989e-05	7.61931e-05	TRUE	enriched hit	6.66454
PMT2	P31382	Dolichyl-phosphate-mannose--protein mannosyltransferase 2 OS=Saccharomyces cerevisiae (strain ATCC 204508 / S288c) GN=PMT2 PE=1 SV=2	1	1	3	3	2	6.45829	1.58682	22.228	7.90592	5.23262e-05	7.69682e-05	2.2762	1.47345e-06	7.40225e-08	1.41775e-06	WT - Control	limma	5.23262e-05	7.69682e-05	TRUE	enriched hit	6.45829
RPL36B	O14455	60S ribosomal protein L36-B OS=Saccharomyces cerevisiae (strain ATCC 204508 / S288c) GN=RPL36B PE=1 SV=3	1	1	3	3	6	7.29962	3.49682	24.0342	7.89636	5.27755e-05	7.74789e-05	2.26707	1.51698e-06	7.6092e-08	1.41775e-06	WT - Control	limma	5.27755e-05	7.74789e-05	TRUE	enriched hit	7.29962
RPL37A	P49166	60S ribosomal protein L37-A OS=Saccharomyces cerevisiae (strain ATCC 204508 / S288c) GN=RPL37A PE=1 SV=2	1	1	3	3	2	6.64721	3.26656	21.6258	7.87459	5.38154e-05	7.8781e-05	2.24623	1.62085e-06	8.10045e-08	1.41775e-06	WT - Control	limma	5.38154e-05	7.8781e-05	TRUE	enriched hit	6.64721
RPL18A|RPL18B	P0CX49|P0CX50	60S ribosomal protein L18-A OS=Saccharomyces cerevisiae (strain ATCC 204508 / S288c) GN=RPL18A PE=1 SV=1|60S ribosomal protein L18-B OS=Saccharomyces cerevisiae (strain ATCC 204508 / S288c) GN=RPL18B PE=1 SV=1	1	1	3	3	10	8.41736	3.7391	26.1404	7.87346	5.387e-05	7.8781e-05	2.24515	1.62642e-06	8.12672e-08	1.41775e-06	WT - Control	limma	5.387e-05	7.8781e-05	TRUE	enriched hit	8.41736
RPL6B	P05739	60S ribosomal protein L6-B OS=Saccharomyces cerevisiae (strain ATCC 204508 / S288c) GN=RPL6B PE=1 SV=4	1	1	3	3	5	6.82534	2.3356	22.5046	7.86969	5.40529e-05	7.88965e-05	2.24153	1.64518e-06	8.21503e-08	2.66836e-06	WT - Control	limma	5.40529e-05	7.88965e-05	TRUE	enriched hit	6.82534
PRP19	P32523	Pre-mRNA-processing factor 19 OS=Saccharomyces cerevisiae (strain ATCC 204508 / S288c) GN=PRP19 PE=1 SV=2	1	1	3	3	2	5.55948	2.50092	20.1048	7.84971	5.50321e-05	8.01716e-05	2.22235	1.74795e-06	8.71143e-08	3.36587e-06	WT - Control	limma	5.50321e-05	8.01716e-05	TRUE	enriched hit	5.55948
TRM1	P15565|P15565-2	tRNA (guanine(26)-N(2))-dimethyltransferase, mitochondrial OS=Saccharomyces cerevisiae (strain ATCC 204508 / S288c) GN=TRM1 PE=1 SV=1|Isoform 2 of tRNA (guanine(26)-N(2))-dimethyltransferase, mitochondrial OS=Saccharomyces cerevisiae (strain ATCC 204508 / S288c) GN=TRM1	1	1	3	3	2	5.84309	1.81388	20.8012	7.81004	5.7036e-05	8.29316e-05	2.18414	1.97064e-06	9.78899e-08	3.36587e-06	WT - Control	limma	5.7036e-05	8.29316e-05	TRUE	enriched hit	5.84309
ERG6	P25087	Sterol 24-C-methyltransferase OS=Saccharomyces cerevisiae (strain ATCC 204508 / S288c) GN=ERG6 PE=1 SV=4	1	1	3	3	6	6.55812	1.5339	24.1518	7.80391	5.73525e-05	8.32324e-05	2.17823	2.00736e-06	9.96598e-08	3.36587e-06	WT - Control	limma	5.73525e-05	8.32324e-05	TRUE	enriched hit	6.55812
SCC2	Q04002	Sister chromatid cohesion protein 2 OS=Saccharomyces cerevisiae (strain ATCC 204508 / S288c) GN=SCC2 PE=1 SV=1	1	1	3	3	7	5.86353	1.95277	22.2007	7.78314	5.84405e-05	8.46495e-05	2.15815	2.13683e-06	1.05886e-07	4.00367e-06	WT - Control	limma	5.84405e-05	8.46495e-05	TRUE	enriched hit	5.86353
ARB1	P40024	ABC transporter ATP-binding protein ARB1 OS=Saccharomyces cerevisiae (strain ATCC 204508 / S288c) GN=ARB1 PE=1 SV=1	1	1	3	3	8	6.57822	2.35613	23.5329	7.75879	5.97455e-05	8.6375e-05	2.13454	2.29887e-06	1.13687e-07	4.00367e-06	WT - Control	limma	5.97455e-05	8.6375e-05	TRUE	enriched hit	6.57822
RPL42A|RPL42B	P0CX27|P0CX28	60S ribosomal protein L42-A OS=Saccharomyces cerevisiae (strain ATCC 204508 / S288c) GN=RPL42A PE=1 SV=1|60S ribosomal protein L42-B OS=Saccharomyces cerevisiae (strain ATCC 204508 / S288c) GN=RPL42B PE=1 SV=1	1	1	3	3	3	7.94731	3.65656	24.1627	7.73653	6.09668e-05	8.7973e-05	2.11292	2.45725e-06	1.21282e-07	4.00367e-06	WT - Control	limma	6.09668e-05	8.7973e-05	TRUE	enriched hit	7.94731
ENO1	P00924	Enolase 1 OS=Saccharomyces cerevisiae (strain ATCC 204508 / S288c) GN=ENO1 PE=1 SV=3	1	1	3	3	5	7.11217	2.04818	23.705	7.71213	6.23375e-05	8.97801e-05	2.08915	2.64287e-06	1.30146e-07	4.00367e-06	WT - Control	limma	6.23375e-05	8.97801e-05	TRUE	enriched hit	7.11217
DNM1	P54861	Dynamin-related protein DNM1 OS=Saccharomyces cerevisiae (strain ATCC 204508 / S288c) GN=DNM1 PE=1 SV=1	1	1	3	3	2	5.96651	2.0396	20.927	7.69139	6.35298e-05	9.13241e-05	2.06889	2.8112e-06	1.38149e-07	4.00367e-06	WT - Control	limma	6.35298e-05	9.13241e-05	TRUE	enriched hit	5.96651
RFC1	P38630	Replication factor C subunit 1 OS=Saccharomyces cerevisiae (strain ATCC 204508 / S288c) GN=RFC1 PE=1 SV=1	1	1	3	3	3	5.8468	2.22731	21.2732	7.66971	6.48029e-05	9.29781e-05	2.04768	2.99808e-06	1.46996e-07	4.00367e-06	WT - Control	limma	6.48029e-05	9.29781e-05	TRUE	enriched hit	5.8468
FHL1	P39521	Pre-rRNA-processing protein FHL1 OS=Saccharomyces cerevisiae (strain ATCC 204508 / S288c) GN=FHL1 PE=1 SV=1	1	1	3	3	2	7.03779	2.69562	20.3175	7.64275	6.64263e-05	9.51275e-05	2.02122	3.2472e-06	1.58726e-07	4.00367e-06	WT - Control	limma	6.64263e-05	9.51275e-05	TRUE	enriched hit	7.03779
YHR020W	P38708	Putative proline--tRNA ligase YHR020W OS=Saccharomyces cerevisiae (strain ATCC 204508 / S288c) GN=YHR020W PE=1 SV=1	1	1	3	3	4	6.19176	1.81378	22.2479	7.63272	6.70412e-05	9.58273e-05	2.01136	3.34477e-06	1.63301e-07	4.00367e-06	WT - Control	limma	6.70412e-05	9.58273e-05	TRUE	enriched hit	6.19176
VPS17	P32913	Vacuolar protein sorting-associated protein 17 OS=Saccharomyces cerevisiae (strain ATCC 204508 / S288c) GN=VPS17 PE=1 SV=2	1	1	3	3	3	5.7104	1.69319	21.6402	7.63014	6.72007e-05	9.58747e-05	2.00882	3.37036e-06	1.64499e-07	7.59578e-06	WT - Control	limma	6.72007e-05	9.58747e-05	TRUE	enriched hit	5.7104
RTS1	P38903	Serine/threonine-protein phosphatase 2A 56 kDa regulatory subunit delta isoform OS=Saccharomyces cerevisiae (strain ATCC 204508 / S288c) GN=RTS1 PE=1 SV=2	1	1	3	3	3	6.18327	2.63415	21.6094	7.58773	6.98812e-05	9.95118e-05	1.96698	3.81854e-06	1.85838e-07	7.59578e-06	WT - Control	limma	6.98812e-05	9.95118e-05	TRUE	enriched hit	6.18327
PAB1	P04147	Polyadenylate-binding protein, cytoplasmic and nuclear OS=Saccharomyces cerevisiae (strain ATCC 204508 / S288c) GN=PAB1 PE=1 SV=4	1	1	3	3	5	6.28697	1.66883	23.2219	7.57502	7.07074e-05	0.0001005	1.95441	3.96361e-06	1.92719e-07	7.59578e-06	WT - Control	limma	7.07074e-05	0.0001005	TRUE	enriched hit	6.28697
GLK1	P17709	Glucokinase-1 OS=Saccharomyces cerevisiae (strain ATCC 204508 / S288c) GN=GLK1 PE=1 SV=1	1	1	3	3	4	6.56212	2.11082	24.2235	7.55135	7.22752e-05	0.000102536	1.93095	4.24796e-06	2.0617e-07	8.75803e-06	WT - Control	limma	7.22752e-05	0.000102536	TRUE	enriched hit	6.56212
RPS6A|RPS6B	P0CX37|P0CX38	40S ribosomal protein S6-A OS=Saccharomyces cerevisiae (strain ATCC 204508 / S288c) GN=RPS6A PE=1 SV=1|40S ribosomal protein S6-B OS=Saccharomyces cerevisiae (strain ATCC 204508 / S288c) GN=RPS6B PE=1 SV=1	1	1	3	3	9	8.28255	2.72666	24.8011	7.52331	7.41822e-05	0.000105045	1.90308	4.61005e-06	2.23295e-07	8.75803e-06	WT - Control	limma	7.41822e-05	0.000105045	TRUE	enriched hit	8.28255
YGR266W	P53326	Uncharacterized protein YGR266W OS=Saccharomyces cerevisiae (strain ATCC 204508 / S288c) GN=YGR266W PE=1 SV=1	1	1	3	3	2	5.75293	1.98732	21.2015	7.50076	7.57566e-05	0.000107075	1.8806	4.92255e-06	2.3802e-07	8.771e-06	WT - Control	limma	7.57566e-05	0.000107075	TRUE	enriched hit	5.75293
COR1	P07256	Cytochrome b-c1 complex subunit 1, mitochondrial OS=Saccharomyces cerevisiae (strain ATCC 204508 / S288c) GN=COR1 PE=1 SV=1	1	1	3	3	8	6.79034	1.78617	24.2273	7.44183	8.00504e-05	0.000112934	1.82159	5.83813e-06	2.80874e-07	8.771e-06	WT - Control	limma	8.00504e-05	0.000112934	TRUE	enriched hit	6.79034
RPS7B	P48164	40S ribosomal protein S7-B OS=Saccharomyces cerevisiae (strain ATCC 204508 / S288c) GN=RPS7B PE=1 SV=1	1	1	3	3	3	6.06608	2.05305	23.3362	7.43606	8.04847e-05	0.000113244	1.81579	5.93596e-06	2.85427e-07	8.771e-06	WT - Control	limma	8.04847e-05	0.000113244	TRUE	enriched hit	6.06608
VPS72	Q03388	Vacuolar protein sorting-associated protein 72 OS=Saccharomyces cerevisiae (strain ATCC 204508 / S288c) GN=VPS72 PE=1 SV=2	1	1	3	3	3	5.65232	2.74257	20.5874	7.43495	8.05686e-05	0.000113244	1.81468	5.95497e-06	2.86311e-07	8.771e-06	WT - Control	limma	8.05686e-05	0.000113244	TRUE	enriched hit	5.65232
RPL22A	P05749	60S ribosomal protein L22-A OS=Saccharomyces cerevisiae (strain ATCC 204508 / S288c) GN=RPL22A PE=1 SV=3	1	1	3	3	2	6.49231	1.67682	20.4461	7.40086	8.31943e-05	0.000116718	1.78034	6.56829e-06	3.14741e-07	8.771e-06	WT - Control	limma	8.31943e-05	0.000116718	TRUE	enriched hit	6.49231
SMY2	P32909	Protein SMY2 OS=Saccharomyces cerevisiae (strain ATCC 204508 / S288c) GN=SMY2 PE=1 SV=2	1	1	3	3	6	6.24637	2.0638	23.545	7.35664	8.67428e-05	0.000121472	1.73561	7.45427e-06	3.55476e-07	8.771e-06	WT - Control	limma	8.67428e-05	0.000121472	TRUE	enriched hit	6.24637
MOT1	P32333	TATA-binding protein-associated factor MOT1 OS=Saccharomyces cerevisiae (strain ATCC 204508 / S288c) GN=MOT1 PE=1 SV=1	1	1	3	3	5	5.91147	2.94197	20.8365	7.35204	8.71213e-05	0.000121777	1.73094	7.5527e-06	3.59977e-07	8.771e-06	WT - Control	limma	8.71213e-05	0.000121777	TRUE	enriched hit	5.91147
RIO2	P40160	Serine/threonine-protein kinase RIO2 OS=Saccharomyces cerevisiae (strain ATCC 204508 / S288c) GN=RIO2 PE=1 SV=1	1	1	3	3	2	6.04239	2.17261	21.4265	7.32803	8.9128e-05	0.000124153	1.70655	8.08717e-06	3.84334e-07	8.771e-06	WT - Control	limma	8.9128e-05	0.000124153	TRUE	enriched hit	6.04239
SLM1	P40485	Phosphatidylinositol 4,5-bisphosphate-binding protein SLM1 OS=Saccharomyces cerevisiae (strain ATCC 204508 / S288c) GN=SLM1 PE=1 SV=1	1	1	3	3	4	6.27367	2.91324	22.6387	7.32779	8.91479e-05	0.000124153	1.70631	8.09257e-06	3.8458e-07	8.771e-06	WT - Control	limma	8.91479e-05	0.000124153	TRUE	enriched hit	6.27367
TUB1|TUB3	P09733|P09734	Tubulin alpha-1 chain OS=Saccharomyces cerevisiae (strain ATCC 204508 / S288c) GN=TUB1 PE=1 SV=2|Tubulin alpha-3 chain OS=Saccharomyces cerevisiae (strain ATCC 204508 / S288c) GN=TUB3 PE=1 SV=1	1	1	3	3	2	6.38063	1.67617	21.3118	7.32448	8.94285e-05	0.000124315	1.70295	8.16904e-06	3.88053e-07	8.771e-06	WT - Control	limma	8.94285e-05	0.000124315	TRUE	enriched hit	6.38063
GLC3	P32775	1,4-alpha-glucan-branching enzyme OS=Saccharomyces cerevisiae (strain ATCC 204508 / S288c) GN=GLC3 PE=1 SV=2	1	1	3	3	7	6.1083	1.60468	22.804	7.31296	9.04135e-05	0.000125455	1.69121	8.44083e-06	4.00374e-07	8.771e-06	WT - Control	limma	9.04135e-05	0.000125455	TRUE	enriched hit	6.1083
CPS1	P27614	Carboxypeptidase S OS=Saccharomyces cerevisiae (strain ATCC 204508 / S288c) GN=CPS1 PE=1 SV=2	1	1	3	3	3	5.66225	1.52352	21.3335	7.29307	9.21418e-05	0.000127607	1.67093	8.93029e-06	4.22473e-07	8.771e-06	WT - Control	limma	9.21418e-05	0.000127607	TRUE	enriched hit	5.66225
CCT3	P39077	T-complex protein 1 subunit gamma OS=Saccharomyces cerevisiae (strain ATCC 204508 / S288c) GN=CCT3 PE=1 SV=2	1	1	3	3	3	5.82064	1.72329	21.2777	7.29127	9.23005e-05	0.000127607	1.66908	8.97607e-06	4.24534e-07	1.25398e-05	WT - Control	limma	9.23005e-05	0.000127607	TRUE	enriched hit	5.82064
RPL21A|RPL21B	Q02753|Q12672	60S ribosomal protein L21-A OS=Saccharomyces cerevisiae (strain ATCC 204508 / S288c) GN=RPL21A PE=1 SV=1|60S ribosomal protein L21-B OS=Saccharomyces cerevisiae (strain ATCC 204508 / S288c) GN=RPL21B PE=1 SV=1	1	1	3	3	6	7.5474	2.21097	25.2438	7.25526	9.553e-05	0.000131616	1.63223	9.93674e-06	4.68273e-07	1.25398e-05	WT - Control	limma	9.553e-05	0.000131616	TRUE	enriched hit	7.5474
PEP4	P07267	Saccharopepsin OS=Saccharomyces cerevisiae (strain ATCC 204508 / S288c) GN=PEP4 PE=1 SV=1	1	1	3	3	2	6.13317	1.93284	20.9497	7.25507	9.5547e-05	0.000131616	1.63204	9.94194e-06	4.68509e-07	1.8144e-05	WT - Control	limma	9.5547e-05	0.000131616	TRUE	enriched hit	6.13317
GAS1	P22146	1,3-beta-glucanosyltransferase GAS1 OS=Saccharomyces cerevisiae (strain ATCC 204508 / S288c) GN=GAS1 PE=1 SV=2	1	1	3	3	3	6.13597	1.90125	22.5615	7.1682	0.00010387	0.000142821	1.54253	1.26819e-05	5.93406e-07	1.8144e-05	WT - Control	limma	0.00010387	0.000142821	TRUE	enriched hit	6.13597
ARG1	P22768	Argininosuccinate synthase OS=Saccharomyces cerevisiae (strain ATCC 204508 / S288c) GN=ARG1 PE=1 SV=3	1	1	3	3	4	6.50048	2.08566	22.6882	7.1536	0.000105346	0.000144589	1.5274	1.32079e-05	6.17182e-07	1.8144e-05	WT - Control	limma	0.000105346	0.000144589	TRUE	enriched hit	6.50048
UTP23	Q12339	rRNA-processing protein UTP23 OS=Saccharomyces cerevisiae (strain ATCC 204508 / S288c) GN=UTP23 PE=1 SV=1	1	1	3	3	6	6.31309	2.44412	23.4477	7.14006	0.000106736	0.000146232	1.51335	1.37142e-05	6.40007e-07	1.8144e-05	WT - Control	limma	0.000106736	0.000146232	TRUE	enriched hit	6.31309
ADE3	P07245	C-1-tetrahydrofolate synthase, cytoplasmic OS=Saccharomyces cerevisiae (strain ATCC 204508 / S288c) GN=ADE3 PE=1 SV=1	1	1	3	3	8	6.64115	2.14836	22.8833	7.13207	0.000107565	0.000147103	1.50505	1.40217e-05	6.53836e-07	1.8144e-05	WT - Control	limma	0.000107565	0.000147103	TRUE	enriched hit	6.64115
CCT4	P39078	T-complex protein 1 subunit delta OS=Saccharomyces cerevisiae (strain ATCC 204508 / S288c) GN=CCT4 PE=1 SV=2	1	1	3	3	6	6.12228	2.44305	22.8951	7.11992	0.000108841	0.00014858	1.49241	1.4502e-05	6.754e-07	1.8144e-05	WT - Control	limma	0.000108841	0.00014858	TRUE	enriched hit	6.12228
TAF14	P35189	Transcription initiation factor TFIID subunit 14 OS=Saccharomyces cerevisiae (strain ATCC 204508 / S288c) GN=TAF14 PE=1 SV=1	1	1	3	3	2	5.96033	2.90813	21.606	7.11402	0.000109466	0.000149164	1.48627	1.47406e-05	6.86092e-07	1.8144e-05	WT - Control	limma	0.000109466	0.000149164	TRUE	enriched hit	5.96033
IDP3	P53982	Isocitrate dehydrogenase [NADP] OS=Saccharomyces cerevisiae (strain ATCC 204508 / S288c) GN=IDP3 PE=3 SV=1	1	1	3	3	2	5.58867	1.63442	20.3841	7.10427	0.000110508	0.000150315	1.47611	1.51434e-05	7.04113e-07	1.8144e-05	WT - Control	limma	0.000110508	0.000150315	TRUE	enriched hit	5.58867
PGK1	P00560	Phosphoglycerate kinase OS=Saccharomyces cerevisiae (strain ATCC 204508 / S288c) GN=PGK1 PE=1 SV=2	1	1	3	3	14	7.034	1.43653	25.5524	7.09509	0.000111499	0.000151391	1.46654	1.55321e-05	7.21467e-07	2.08227e-05	WT - Control	limma	0.000111499	0.000151391	TRUE	enriched hit	7.034
LYS1	P38998	Saccharopine dehydrogenase [NAD(+), L-lysine-forming] OS=Saccharomyces cerevisiae (strain ATCC 204508 / S288c) GN=LYS1 PE=1 SV=3	1	1	3	3	3	6.37433	1.9172	21.8767	7.06235	0.000115117	0.000156024	1.4323	1.69982e-05	7.86996e-07	2.08227e-05	WT - Control	limma	0.000115117	0.000156024	TRUE	enriched hit	6.37433
GGA1	Q06336	ADP-ribosylation factor-binding protein GGA1 OS=Saccharomyces cerevisiae (strain ATCC 204508 / S288c) GN=GGA1 PE=1 SV=1	1	1	3	3	2	5.48592	1.9546	20.5645	7.05363	0.000116102	0.000157079	1.42316	1.74105e-05	8.05345e-07	2.08227e-05	WT - Control	limma	0.000116102	0.000157079	TRUE	enriched hit	5.48592
ARL1	P38116	ADP-ribosylation factor-like protein 1 OS=Saccharomyces cerevisiae (strain ATCC 204508 / S288c) GN=ARL1 PE=1 SV=4	1	1	3	3	2	5.64165	1.92718	20.8191	7.02663	0.000119212	0.000161	1.39481	1.87476e-05	8.64624e-07	2.08227e-05	WT - Control	limma	0.000119212	0.000161	TRUE	enriched hit	5.64165
NTH1	P32356	Neutral trehalase OS=Saccharomyces cerevisiae (strain ATCC 204508 / S288c) GN=NTH1 PE=1 SV=3	1	1	3	3	2	5.576	2.06892	20.6506	7.012	0.000120935	0.000163037	1.37941	1.95122e-05	8.98369e-07	2.08227e-05	WT - Control	limma	0.000120935	0.000163037	TRUE	enriched hit	5.576
CDC24	P11433	Cell division control protein 24 OS=Saccharomyces cerevisiae (strain ATCC 204508 / S288c) GN=CDC24 PE=1 SV=2	1	1	3	3	2	5.42623	2.58204	19.5735	6.98636	0.000124024	0.000166905	1.35236	2.09252e-05	9.60424e-07	2.08227e-05	WT - Control	limma	0.000124024	0.000166905	TRUE	enriched hit	5.42623
ARX1	Q03862	Probable metalloprotease ARX1 OS=Saccharomyces cerevisiae (strain ATCC 204508 / S288c) GN=ARX1 PE=1 SV=1	1	1	3	3	2	5.94002	3.58589	20.4092	6.97218	0.00012577	0.000168954	1.33737	2.17479e-05	9.96377e-07	2.08227e-05	WT - Control	limma	0.00012577	0.000168954	TRUE	enriched hit	5.94002
MRPL11	P36521	54S ribosomal protein L11, mitochondrial OS=Saccharomyces cerevisiae (strain ATCC 204508 / S288c) GN=MRPL11 PE=1 SV=2	1	1	3	3	2	6.07128	2.85561	22.1816	6.94815	0.00012879	0.000172409	1.3119	2.32128e-05	1.06007e-06	2.08227e-05	WT - Control	limma	0.00012879	0.000172409	TRUE	enriched hit	6.07128
ADH2	P00331	Alcohol dehydrogenase 2 OS=Saccharomyces cerevisiae (strain ATCC 204508 / S288c) GN=ADH2 PE=1 SV=3	1	1	3	3	3	6.17989	2.30187	21.6363	6.94811	0.000128795	0.000172409	1.31186	2.32153e-05	1.06018e-06	2.08227e-05	WT - Control	limma	0.000128795	0.000172409	TRUE	enriched hit	6.17989
RSC9	Q03124	Chromatin structure-remodeling complex subunit RSC9 OS=Saccharomyces cerevisiae (strain ATCC 204508 / S288c) GN=RSC9 PE=1 SV=1	1	1	3	3	2	5.52529	2.6127	21.0665	6.94439	0.000129269	0.000172708	1.30792	2.34499e-05	1.07034e-06	2.08227e-05	WT - Control	limma	0.000129269	0.000172708	TRUE	enriched hit	5.52529
PCK1	P10963	Phosphoenolpyruvate carboxykinase [ATP] OS=Saccharomyces cerevisiae (strain ATCC 204508 / S288c) GN=PCK1 PE=1 SV=2	1	1	3	3	11	7.46373	1.91529	24.3243	6.9428	0.000129474	0.000172708	1.30622	2.35515e-05	1.07474e-06	2.52569e-05	WT - Control	limma	0.000129474	0.000172708	TRUE	enriched hit	7.46373
TIF1	P10081	ATP-dependent RNA helicase eIF4A OS=Saccharomyces cerevisiae (strain ATCC 204508 / S288c) GN=TIF1 PE=1 SV=3	1	1	3	3	7	6.78547	2.33752	23.9266	6.91407	0.000133213	0.000177188	1.27568	2.54518e-05	1.15748e-06	2.52569e-05	WT - Control	limma	0.000133213	0.000177188	TRUE	enriched hit	6.78547
SAM1	P10659	S-adenosylmethionine synthase 1 OS=Saccharomyces cerevisiae (strain ATCC 204508 / S288c) GN=SAM1 PE=1 SV=2	1	1	3	3	2	6.39841	2.11815	21.7895	6.91341	0.0001333	0.000177188	1.27498	2.54969e-05	1.15944e-06	3.26258e-05	WT - Control	limma	0.0001333	0.000177188	TRUE	enriched hit	6.39841
RPL32	P38061	60S ribosomal protein L32 OS=Saccharomyces cerevisiae (strain ATCC 204508 / S288c) GN=RPL32 PE=1 SV=1	1	1	3	3	8	7.94422	3.7947	25.3569	6.87049	0.000139115	0.000184595	1.22916	2.86148e-05	1.2956e-06	3.26258e-05	WT - Control	limma	0.000139115	0.000184595	TRUE	enriched hit	7.94422
TAF6	P53040	Transcription initiation factor TFIID subunit 6 OS=Saccharomyces cerevisiae (strain ATCC 204508 / S288c) GN=TAF6 PE=1 SV=1	1	1	3	3	4	5.8291	2.52789	21.7572	6.85861	0.000140774	0.00018647	1.21643	2.954e-05	1.33577e-06	3.26258e-05	WT - Control	limma	0.000140774	0.00018647	TRUE	enriched hit	5.8291
XRN1	P22147	5'-3' exoribonuclease 1 OS=Saccharomyces cerevisiae (strain ATCC 204508 / S288c) GN=XRN1 PE=1 SV=1	1	1	3	3	7	5.99753	1.9266	22.9666	6.85572	0.000141181	0.000186683	1.21334	2.97694e-05	1.34572e-06	3.26258e-05	WT - Control	limma	0.000141181	0.000186683	TRUE	enriched hit	5.99753
FAA2	P39518	Long-chain-fatty-acid--CoA ligase 2 OS=Saccharomyces cerevisiae (strain ATCC 204508 / S288c) GN=FAA2 PE=1 SV=1	1	1	3	3	6	6.41657	2.40229	22.8038	6.83188	0.000144589	0.000190857	1.18774	3.17274e-05	1.43035e-06	3.26258e-05	WT - Control	limma	0.000144589	0.000190857	TRUE	enriched hit	6.41657
KIN2	P13186	Serine/threonine-protein kinase KIN2 OS=Saccharomyces cerevisiae (strain ATCC 204508 / S288c) GN=KIN2 PE=1 SV=3	1	1	3	3	6	6.8015	1.71331	22.5112	6.82408	0.000145722	0.000192019	1.17936	3.23932e-05	1.45902e-06	3.26258e-05	WT - Control	limma	0.000145722	0.000192019	TRUE	enriched hit	6.8015
RPL13B|RPL13A	P40212|Q12690	60S ribosomal protein L13-B OS=Saccharomyces cerevisiae (strain ATCC 204508 / S288c) GN=RPL13B PE=1 SV=1|60S ribosomal protein L13-A OS=Saccharomyces cerevisiae (strain ATCC 204508 / S288c) GN=RPL13A PE=1 SV=1	1	1	3	3	8	8.03646	2.52299	24.4868	6.80881	0.000147971	0.000194645	1.16292	3.37368e-05	1.51673e-06	3.26258e-05	WT - Control	limma	0.000147971	0.000194645	TRUE	enriched hit	8.03646
SDH1	Q00711	Succinate dehydrogenase [ubiquinone] flavoprotein subunit, mitochondrial OS=Saccharomyces cerevisiae (strain ATCC 204508 / S288c) GN=SDH1 PE=1 SV=1	1	1	3	3	11	7.12895	1.99578	25.3599	6.79137	0.000150587	0.000197743	1.1441	3.5336e-05	1.58513e-06	3.26258e-05	WT - Control	limma	0.000150587	0.000197743	TRUE	enriched hit	7.12895
PRS1	P32895	Ribose-phosphate pyrophosphokinase 1 OS=Saccharomyces cerevisiae (strain ATCC 204508 / S288c) GN=PRS1 PE=1 SV=1	1	1	3	3	4	5.77004	1.83305	20.9924	6.74693	0.000157489	0.00020645	1.09599	3.97436e-05	1.77211e-06	3.26258e-05	WT - Control	limma	0.000157489	0.00020645	TRUE	enriched hit	5.77004
SEC18	P18759	Vesicular-fusion protein SEC18 OS=Saccharomyces cerevisiae (strain ATCC 204508 / S288c) GN=SEC18 PE=1 SV=2	1	1	3	3	3	5.72003	1.7762	21.7999	6.73915	0.000158732	0.000207158	1.08755	4.05664e-05	1.80676e-06	3.26258e-05	WT - Control	limma	0.000158732	0.000207158	TRUE	enriched hit	5.72003
SDS24	P38314	Protein SDS24 OS=Saccharomyces cerevisiae (strain ATCC 204508 / S288c) GN=SDS24 PE=1 SV=1	1	1	3	3	2	6.22655	1.39622	21.7307	6.73903	0.000158752	0.000207158	1.08742	4.05795e-05	1.80731e-06	3.26258e-05	WT - Control	limma	0.000158752	0.000207158	TRUE	enriched hit	6.22655
MDH3	P32419	Malate dehydrogenase, peroxisomal OS=Saccharomyces cerevisiae (strain ATCC 204508 / S288c) GN=MDH3 PE=1 SV=3	1	1	3	3	6	6.82224	2.88919	23.6133	6.73843	0.000158849	0.000207158	1.08676	4.06438e-05	1.81002e-06	3.26258e-05	WT - Control	limma	0.000158849	0.000207158	TRUE	enriched hit	6.82224
CYT1	P07143	Cytochrome c1, heme protein, mitochondrial OS=Saccharomyces cerevisiae (strain ATCC 204508 / S288c) GN=CYT1 PE=1 SV=1	1	1	3	3	3	6.46615	1.62063	22.294	6.72951	0.000160288	0.000208677	1.07708	4.16087e-05	1.85055e-06	3.26258e-05	WT - Control	limma	0.000160288	0.000208677	TRUE	enriched hit	6.46615
UTP5	Q04177	U3 small nucleolar RNA-associated protein 5 OS=Saccharomyces cerevisiae (strain ATCC 204508 / S288c) GN=UTP5 PE=1 SV=1	1	1	3	3	2	5.61862	1.83487	21.6116	6.71826	0.000162127	0.000210709	1.06483	4.28581e-05	1.90288e-06	3.26258e-05	WT - Control	limma	0.000162127	0.000210709	TRUE	enriched hit	5.61862
TRP3	P00937	Multifunctional tryptophan biosynthesis protein OS=Saccharomyces cerevisiae (strain ATCC 204508 / S288c) GN=TRP3 PE=1 SV=2	1	1	3	3	2	5.64485	1.9057	21.0438	6.712	0.000163159	0.000211689	1.05801	4.35683e-05	1.93254e-06	3.26258e-05	WT - Control	limma	0.000163159	0.000211689	TRUE	enriched hit	5.64485
EIS1	Q05050	Eisosome protein 1 OS=Saccharomyces cerevisiae (strain ATCC 204508 / S288c) GN=EIS1 PE=1 SV=1	1	1	3	3	5	6.04889	1.55578	22.4312	6.70527	0.000164278	0.000212777	1.05068	4.43444e-05	1.9649e-06	4.67236e-05	WT - Control	limma	0.000164278	0.000212777	TRUE	enriched hit	6.04889
ADH1	P00330	Alcohol dehydrogenase 1 OS=Saccharomyces cerevisiae (strain ATCC 204508 / S288c) GN=ADH1 PE=1 SV=5	1	1	3	3	8	7.09732	1.28351	24.4188	6.68533	0.000167641	0.000216763	1.02892	4.6721e-05	2.06555e-06	4.67236e-05	WT - Control	limma	0.000167641	0.000216763	TRUE	enriched hit	7.09732
PCS60	P38137	Peroxisomal-coenzyme A synthetase OS=Saccharomyces cerevisiae (strain ATCC 204508 / S288c) GN=PCS60 PE=1 SV=1	1	1	3	3	8	7.11416	2.02967	24.5633	6.67441	0.000169516	0.000218814	1.01698	4.80734e-05	2.12262e-06	4.67236e-05	WT - Control	limma	0.000169516	0.000218814	TRUE	enriched hit	7.11416
RPL24A	P04449	60S ribosomal protein L24-A OS=Saccharomyces cerevisiae (strain ATCC 204508 / S288c) GN=RPL24A PE=1 SV=1	1	1	3	3	2	6.50297	2.32592	21.6738	6.64825	0.000174102	0.000224102	0.988308	5.14661e-05	2.26516e-06	4.67236e-05	WT - Control	limma	0.000174102	0.000224102	TRUE	enriched hit	6.50297
RAP1	P11938	DNA-binding protein RAP1 OS=Saccharomyces cerevisiae (strain ATCC 204508 / S288c) GN=RAP1 PE=1 SV=2	1	1	3	3	8	7.06334	2.569	23.1568	6.64768	0.000174203	0.000224102	0.987685	5.15422e-05	2.26834e-06	8.70465e-05	WT - Control	limma	0.000174203	0.000224102	TRUE	enriched hit	7.06334
RPT2	P40327	26S protease regulatory subunit 4 homolog OS=Saccharomyces cerevisiae (strain ATCC 204508 / S288c) GN=RPT2 PE=1 SV=3	1	1	3	3	4	6.16275	1.60669	22.8499	6.61608	0.00017993	0.000231077	0.952947	5.59486e-05	2.4568e-06	8.70465e-05	WT - Control	limma	0.00017993	0.000231077	TRUE	enriched hit	6.16275
SRO9	P25567	RNA-binding protein SRO9 OS=Saccharomyces cerevisiae (strain ATCC 204508 / S288c) GN=SRO9 PE=1 SV=2	1	1	3	3	5	6.1018	1.33761	21.859	6.58617	0.000185543	0.000237884	0.919951	6.04465e-05	2.6483e-06	8.70465e-05	WT - Control	limma	0.000185543	0.000237884	TRUE	enriched hit	6.1018
GGA2	P38817	ADP-ribosylation factor-binding protein GGA2 OS=Saccharomyces cerevisiae (strain ATCC 204508 / S288c) GN=GGA2 PE=1 SV=1	1	1	3	3	2	5.76612	1.91035	21.3359	6.56991	0.000188675	0.000241492	0.90197	6.30327e-05	2.75801e-06	8.70465e-05	WT - Control	limma	0.000188675	0.000241492	TRUE	enriched hit	5.76612
IMH1	Q06704	Golgin IMH1 OS=Saccharomyces cerevisiae (strain ATCC 204508 / S288c) GN=IMH1 PE=1 SV=1	1	1	3	3	2	5.40745	1.95528	19.9603	6.54457	0.000193675	0.000247473	0.873878	6.72735e-05	2.93731e-06	8.70465e-05	WT - Control	limma	0.000193675	0.000247473	TRUE	enriched hit	5.40745
P1707_RE|RTN1	P1707_RE|Q04947	|Reticulon-like protein 1 OS=Saccharomyces cerevisiae (strain ATCC 204508 / S288c) GN=RTN1 PE=1 SV=1	1	1	3	3	2	6.13224	1.53663	22.0585	6.52546	0.000197542	0.00025199	0.852641	7.06484e-05	3.07945e-06	8.70465e-05	WT - Control	limma	0.000197542	0.00025199	TRUE	enriched hit	6.13224
RGI1	P40043	Respiratory growth induced protein 1 OS=Saccharomyces cerevisiae (strain ATCC 204508 / S288c) GN=RGI1 PE=1 SV=1	1	1	3	3	2	6.68889	1.6764	21.4116	6.51992	0.000198679	0.000253015	0.846476	7.16564e-05	3.12182e-06	0.000121166	WT - Control	limma	0.000198679	0.000253015	TRUE	enriched hit	6.68889
KAR2	P16474	78 kDa glucose-regulated protein homolog OS=Saccharomyces cerevisiae (strain ATCC 204508 / S288c) GN=KAR2 PE=1 SV=1	1	1	3	3	5	6.54302	1.9173	23.3166	6.4952	0.000203842	0.000259155	0.818915	7.63229e-05	3.31955e-06	0.000147152	WT - Control	limma	0.000203842	0.000259155	TRUE	enriched hit	6.54302
YDR115W	Q04598	54S ribosomal protein L34, mitochondrial OS=Saccharomyces cerevisiae (strain ATCC 204508 / S288c) GN=YDR115W PE=1 SV=1	1	1	3	3	2	6.70868	1.67007	21.0309	6.46704	0.000209906	0.00026642	0.787416	8.199e-05	3.56007e-06	0.000173032	WT - Control	limma	0.000209906	0.00026642	TRUE	enriched hit	6.70868
HCR1	Q05775	Eukaryotic translation initiation factor 3 subunit J OS=Saccharomyces cerevisiae (strain ATCC 204508 / S288c) GN=HCR1 PE=1 SV=1	1	1	3	3	6	6.90602	1.50172	24.263	6.39109	0.000227276	0.000287984	0.701991	9.93162e-05	4.29371e-06	0.000173032	WT - Control	limma	0.000227276	0.000287984	TRUE	enriched hit	6.90602
RAD51	P25454	DNA repair protein RAD51 OS=Saccharomyces cerevisiae (strain ATCC 204508 / S288c) GN=RAD51 PE=1 SV=1	1	1	3	3	2	6.06753	1.31216	20.7716	6.3816	0.000229556	0.000290389	0.691262	0.00010171	4.39458e-06	0.000173032	WT - Control	limma	0.000229556	0.000290389	TRUE	enriched hit	6.06753
YMR027W	Q04371	Protein-glutamate O-methyltransferase OS=Saccharomyces cerevisiae (strain ATCC 204508 / S288c) GN=YMR027W PE=1 SV=1	1	1	3	3	3	5.83826	1.54175	21.5867	6.3775	0.000230548	0.000291158	0.68663	0.00010276	4.43876e-06	0.000173032	WT - Control	limma	0.000230548	0.000291158	TRUE	enriched hit	5.83826
RPL24B	P24000	60S ribosomal protein L24-B OS=Saccharomyces cerevisiae (strain ATCC 204508 / S288c) GN=RPL24B PE=1 SV=1	1	1	3	3	2	6.54704	1.75398	24.1724	6.33041	0.0002423	0.000305491	0.633202	0.000115588	4.97694e-06	0.000173032	WT - Control	limma	0.0002423	0.000305491	TRUE	enriched hit	6.54704
MRPL36	P36531	54S ribosomal protein L36, mitochondrial OS=Saccharomyces cerevisiae (strain ATCC 204508 / S288c) GN=MRPL36 PE=1 SV=3	1	1	3	3	2	5.91631	1.68099	20.7086	6.28017	0.000255573	0.000321691	0.575889	0.00013093	5.61611e-06	0.000173032	WT - Control	limma	0.000255573	0.000321691	TRUE	enriched hit	5.91631
RPT1	P33299	26S protease regulatory subunit 7 homolog OS=Saccharomyces cerevisiae (strain ATCC 204508 / S288c) GN=RPT1 PE=1 SV=1	1	1	3	3	4	5.85572	1.42908	21.685	6.22837	0.000270102	0.000339417	0.516459	0.000148743	6.35213e-06	0.000173032	WT - Control	limma	0.000270102	0.000339417	TRUE	enriched hit	5.85572
FLC2	P39719	Flavin carrier protein 2 OS=Saccharomyces cerevisiae (strain ATCC 204508 / S288c) GN=FLC2 PE=1 SV=2	1	1	3	3	2	5.47826	-1.67004	20.0764	-6.21263	0.000274696	0.000344619	0.498331	0.000154593	6.59242e-06	0.000173032	WT - Control	limma	0.000274696	0.000344619	FALSE	no hit	5.47826
HSP60	P19882	Heat shock protein 60, mitochondrial OS=Saccharomyces cerevisiae (strain ATCC 204508 / S288c) GN=HSP60 PE=1 SV=1	1	1	3	3	12	6.4109	1.61162	23.4726	6.20065	0.000278253	0.00034825	0.484502	0.000159193	6.78089e-06	0.000173032	WT - Control	limma	0.000278253	0.00034825	TRUE	enriched hit	6.4109
SGV1	P23293	Serine/threonine-protein kinase BUR1 OS=Saccharomyces cerevisiae (strain ATCC 204508 / S288c) GN=SGV1 PE=1 SV=1	1	1	3	3	2	5.4337	1.36583	20.2099	6.19979	0.000278508	0.00034825	0.483518	0.000159525	6.79448e-06	0.000173032	WT - Control	limma	0.000278508	0.00034825	TRUE	enriched hit	5.4337
GCV1	P48015	Aminomethyltransferase, mitochondrial OS=Saccharomyces cerevisiae (strain ATCC 204508 / S288c) GN=GCV1 PE=1 SV=2	1	1	3	3	2	6.43167	1.73929	22.4337	6.1971	0.000279314	0.000348684	0.480412	0.000160576	6.83751e-06	0.000173032	WT - Control	limma	0.000279314	0.000348684	TRUE	enriched hit	6.43167
BAT2	P47176	Branched-chain-amino-acid aminotransferase, cytosolic OS=Saccharomyces cerevisiae (strain ATCC 204508 / S288c) GN=BAT2 PE=1 SV=1	1	1	3	3	2	6.06392	2.09488	22.2353	6.19409	0.00028022	0.000348852	0.476932	0.000161762	6.88599e-06	0.000173032	WT - Control	limma	0.00028022	0.000348852	TRUE	enriched hit	6.06392
RBG1	P39729	Ribosome-interacting GTPase 1 OS=Saccharomyces cerevisiae (strain ATCC 204508 / S288c) GN=RBG1 PE=1 SV=1	1	1	3	3	4	5.98171	1.45135	21.7991	6.1936	0.000280368	0.000348852	0.476363	0.000161957	6.89394e-06	0.000214924	WT - Control	limma	0.000280368	0.000348852	TRUE	enriched hit	5.98171
SEY1	Q99287	Protein SEY1 OS=Saccharomyces cerevisiae (strain ATCC 204508 / S288c) GN=SEY1 PE=1 SV=1	1	1	3	3	5	5.85527	1.31627	22.73	6.13467	0.000298763	0.000371131	0.408058	0.0001869	7.91656e-06	0.000214924	WT - Control	limma	0.000298763	0.000371131	TRUE	enriched hit	5.85527
QCR2	P07257	Cytochrome b-c1 complex subunit 2, mitochondrial OS=Saccharomyces cerevisiae (strain ATCC 204508 / S288c) GN=QCR2 PE=1 SV=1	1	1	3	3	5	6.24538	1.90853	21.8436	6.13276	0.000299382	0.000371293	0.405831	0.000187768	7.95197e-06	0.000214924	WT - Control	limma	0.000299382	0.000371293	TRUE	enriched hit	6.24538
SRL2	Q12020	Protein SRL2 OS=Saccharomyces cerevisiae (strain ATCC 204508 / S288c) GN=SRL2 PE=1 SV=1	1	1	3	3	2	5.49655	1.40854	20.4338	6.12356	0.000302379	0.000374398	0.395125	0.000191991	8.12407e-06	0.000214924	WT - Control	limma	0.000302379	0.000374398	TRUE	enriched hit	5.49655
TUB2	P02557	Tubulin beta chain OS=Saccharomyces cerevisiae (strain ATCC 204508 / S288c) GN=TUB2 PE=1 SV=2	1	1	3	3	3	6.34867	1.31244	23.1081	6.11429	0.000305434	0.000377564	0.384319	0.000196339	8.30097e-06	0.000214924	WT - Control	limma	0.000305434	0.000377564	TRUE	enriched hit	6.34867
CHC1	P22137	Clathrin heavy chain OS=Saccharomyces cerevisiae (strain ATCC 204508 / S288c) GN=CHC1 PE=1 SV=1	1	1	3	3	4	5.91362	2.21572	22.1025	6.09975	0.000310292	0.000382946	0.367357	0.000203343	8.58524e-06	0.000310091	WT - Control	limma	0.000310292	0.000382946	TRUE	enriched hit	5.91362
HOM2	P13663	Aspartate-semialdehyde dehydrogenase OS=Saccharomyces cerevisiae (strain ATCC 204508 / S288c) GN=HOM2 PE=1 SV=1	1	1	3	3	3	5.99494	1.56759	21.8575	6.05588	0.000325476	0.000401033	0.316001	0.000225926	9.50947e-06	0.000310091	WT - Control	limma	0.000325476	0.000401033	TRUE	enriched hit	5.99494
RPL28	P02406	60S ribosomal protein L28 OS=Saccharomyces cerevisiae (strain ATCC 204508 / S288c) GN=RPL28 PE=1 SV=3	1	1	3	3	6	6.79309	2.51101	22.92	6.05348	0.00032633	0.000401434	0.313182	0.000227228	9.56257e-06	0.000351172	WT - Control	limma	0.00032633	0.000401434	TRUE	enriched hit	6.79309
RTG2	P32608	Retrograde regulation protein 2 OS=Saccharomyces cerevisiae (strain ATCC 204508 / S288c) GN=RTG2 PE=1 SV=2	1	1	3	3	3	5.79359	1.64004	21.1414	5.98359	0.000352317	0.0004327	0.230814	0.000268344	1.12375e-05	0.000351172	WT - Control	limma	0.000352317	0.0004327	TRUE	enriched hit	5.79359
YFR006W	P43590	Uncharacterized peptidase YFR006W OS=Saccharomyces cerevisiae (strain ATCC 204508 / S288c) GN=YFR006W PE=1 SV=1	1	1	3	3	2	5.64596	1.78459	20.4499	5.96265	0.000360542	0.000442087	0.206005	0.000281962	1.17886e-05	0.000351172	WT - Control	limma	0.000360542	0.000442087	TRUE	enriched hit	5.64596
RET2	P43621	Coatomer subunit delta OS=Saccharomyces cerevisiae (strain ATCC 204508 / S288c) GN=RET2 PE=1 SV=3	1	1	3	3	2	5.82201	1.6079	20.656	5.94983	0.000365684	0.000447164	0.190782	0.000290618	1.21381e-05	0.000351172	WT - Control	limma	0.000365684	0.000447164	TRUE	enriched hit	5.82201
SOF1	P33750	Protein SOF1 OS=Saccharomyces cerevisiae (strain ATCC 204508 / S288c) GN=SOF1 PE=1 SV=1	1	1	3	3	2	5.58296	1.35512	21.1997	5.94939	0.000365861	0.000447164	0.190262	0.000290918	1.21502e-05	0.000351172	WT - Control	limma	0.000365861	0.000447164	TRUE	enriched hit	5.58296
VMA1	P17255	V-type proton ATPase catalytic subunit A OS=Saccharomyces cerevisiae (strain ATCC 204508 / S288c) GN=VMA1 PE=1 SV=3	1	1	3	3	9	6.63322	1.9972	23.8424	5.94369	0.000368174	0.000449267	0.183486	0.00029485	1.23086e-05	0.000407274	WT - Control	limma	0.000368174	0.000449267	TRUE	enriched hit	6.63322
PWP1	P21304	Periodic tryptophan protein 1 OS=Saccharomyces cerevisiae (strain ATCC 204508 / S288c) GN=PWP1 PE=1 SV=1	1	1	3	3	2	5.53725	1.69517	21.6087	5.92163	0.000377277	0.000459636	0.157232	0.000310535	1.29426e-05	0.000466646	WT - Control	limma	0.000377277	0.000459636	TRUE	enriched hit	5.53725
RVS161	P25343	Reduced viability upon starvation protein 161 OS=Saccharomyces cerevisiae (strain ATCC 204508 / S288c) GN=RVS161 PE=1 SV=1	1	1	3	3	4	6.03673	1.92016	21.9369	5.8476	0.000409685	0.000498319	0.0686404	0.000369072	1.53023e-05	0.000466646	WT - Control	limma	0.000409685	0.000498319	TRUE	enriched hit	6.03673
RPS28B|RPS28A	P0C0X0|Q3E7X9	40S ribosomal protein S28-B OS=Saccharomyces cerevisiae (strain ATCC 204508 / S288c) GN=RPS28B PE=1 SV=1|40S ribosomal protein S28-A OS=Saccharomyces cerevisiae (strain ATCC 204508 / S288c) GN=RPS28A PE=1 SV=1	1	1	3	3	4	6.67528	1.28797	22.8082	5.84165	0.000412419	0.000500842	0.06149	0.000374198	1.55078e-05	0.000466646	WT - Control	limma	0.000412419	0.000500842	TRUE	enriched hit	6.67528
RPC10	P40422	DNA-directed RNA polymerases I, II, and III subunit RPABC4 OS=Saccharomyces cerevisiae (strain ATCC 204508 / S288c) GN=RPC10 PE=1 SV=1	1	1	3	3	2	5.90254	3.95568	20.5176	5.83122	0.000417265	0.000505918	0.0489316	0.000383352	1.58742e-05	0.000466646	WT - Control	limma	0.000417265	0.000505918	TRUE	enriched hit	5.90254
TOR2	P32600	Serine/threonine-protein kinase TOR2 OS=Saccharomyces cerevisiae (strain ATCC 204508 / S288c) GN=TOR2 PE=1 SV=3	1	1	3	3	3	5.62532	1.71367	20.6765	5.80944	0.000427583	0.000517601	0.0226736	0.000403137	1.66642e-05	0.000466646	WT - Control	limma	0.000427583	0.000517601	TRUE	enriched hit	5.62532
HttQx_EGFP	HttQx_EGFP	NA	1	1	3	3	2	6.02896	1.23724	21.3023	5.78205	0.000440957	0.000532292	-0.0104337	0.000429366	1.77073e-05	0.000466646	WT - Control	limma	0.000440957	0.000532292	TRUE	enriched hit	6.02896
RAD52	P06778|P06778-2|P06778-3	DNA repair and recombination protein RAD52 OS=Saccharomyces cerevisiae (strain ATCC 204508 / S288c) GN=RAD52 PE=1 SV=2|Isoform 2 of DNA repair and recombination protein RAD52 OS=Saccharomyces cerevisiae (strain ATCC 204508 / S288c) GN=RAD52|Isoform 3 of DNA repair and recombination protein RAD52 OS=Saccharomyces cerevisiae (strain ATCC 204508 / S288c) GN=RAD52	1	1	3	3	2	5.82085	2.48191	20.632	5.78172	0.000441122	0.000532292	-0.010835	0.000429693	1.77203e-05	0.000466646	WT - Control	limma	0.000441122	0.000532292	TRUE	enriched hit	5.82085
RPL3	P14126	60S ribosomal protein L3 OS=Saccharomyces cerevisiae (strain ATCC 204508 / S288c) GN=RPL3 PE=1 SV=4	1	1	3	3	17	8.14665	2.5439	26.3966	5.76691	0.000448549	0.000540395	-0.0287839	0.000444545	1.83087e-05	0.000466646	WT - Control	limma	0.000448549	0.000540395	TRUE	enriched hit	8.14665
RPS12	P48589	40S ribosomal protein S12 OS=Saccharomyces cerevisiae (strain ATCC 204508 / S288c) GN=RPS12 PE=1 SV=1	1	1	3	3	2	6.94291	1.61945	21.4691	5.75354	0.000455373	0.000547746	-0.0450136	0.000458362	1.88548e-05	0.000466646	WT - Control	limma	0.000455373	0.000547746	TRUE	enriched hit	6.94291
GLT1	Q12680	Glutamate synthase [NADH] OS=Saccharomyces cerevisiae (strain ATCC 204508 / S288c) GN=GLT1 PE=1 SV=2	1	1	3	3	4	6.31436	2.91402	20.1491	5.73105	0.000764225	0.000894344	-0.410403	0.00048251	1.9806e-05	0.000466646	WT - Control	limma	0.000764225	0.000894344	TRUE	enriched hit	6.31436
SEC8	P32855	Exocyst complex component SEC8 OS=Saccharomyces cerevisiae (strain ATCC 204508 / S288c) GN=SEC8 PE=1 SV=1	1	1	3	3	2	5.47118	1.74537	21.2591	5.72406	0.000470824	0.000565436	-0.0808807	0.000490252	2.01101e-05	0.000505508	WT - Control	limma	0.000470824	0.000565436	TRUE	enriched hit	5.47118
RPS17A|RPS17B	P02407|P14127	40S ribosomal protein S17-A OS=Saccharomyces cerevisiae (strain ATCC 204508 / S288c) GN=RPS17A PE=1 SV=1|40S ribosomal protein S17-B OS=Saccharomyces cerevisiae (strain ATCC 204508 / S288c) GN=RPS17B PE=1 SV=1	1	1	3	3	3	5.91371	2.02663	21.3489	5.69304	0.000487712	0.000584792	-0.118762	0.000526044	2.15158e-05	0.000505508	WT - Control	limma	0.000487712	0.000584792	TRUE	enriched hit	5.91371
CST6	P40535	ATF/CREB activator 2 OS=Saccharomyces cerevisiae (strain ATCC 204508 / S288c) GN=CST6 PE=1 SV=1	1	1	3	3	3	6.27089	1.62049	22.7298	5.6904	0.000489175	0.000585621	-0.121981	0.000529189	2.16389e-05	0.000571295	WT - Control	limma	0.000489175	0.000585621	TRUE	enriched hit	6.27089
CUE5	Q08412	Ubiquitin-binding protein CUE5 OS=Saccharomyces cerevisiae (strain ATCC 204508 / S288c) GN=CUE5 PE=1 SV=1	1	1	3	3	3	5.61934	1.6293	21.7336	5.67199	0.000499548	0.000597098	-0.144535	0.000551694	2.25229e-05	0.000571295	WT - Control	limma	0.000499548	0.000597098	TRUE	enriched hit	5.61934
RQC2	Q12532	Ribosome quality control complex subunit 2 OS=Saccharomyces cerevisiae (strain ATCC 204508 / S288c) GN=RQC2 PE=1 SV=1	1	1	3	3	3	5.53232	2.24736	20.8058	5.64038	0.000517922	0.000618086	-0.183357	0.000592411	2.4115e-05	0.000571295	WT - Control	limma	0.000517922	0.000618086	TRUE	enriched hit	5.53232
HEF3	P53978	Elongation factor 3B OS=Saccharomyces cerevisiae (strain ATCC 204508 / S288c) GN=HEF3 PE=1 SV=2	1	1	3	3	2	5.78496	1.77526	20.7318	5.63699	0.000519938	0.000619518	-0.187533	0.000596945	2.42917e-05	0.000571295	WT - Control	limma	0.000519938	0.000619518	TRUE	enriched hit	5.78496
CPA2	P03965	Carbamoyl-phosphate synthase arginine-specific large chain OS=Saccharomyces cerevisiae (strain ATCC 204508 / S288c) GN=CPA2 PE=1 SV=1	1	1	3	3	2	5.93697	2.24612	21.789	5.62212	0.000528877	0.000629181	-0.205853	0.000617197	2.50796e-05	0.000638201	WT - Control	limma	0.000528877	0.000629181	TRUE	enriched hit	5.93697
ADE12	P80210	Adenylosuccinate synthetase OS=Saccharomyces cerevisiae (strain ATCC 204508 / S288c) GN=ADE12 PE=1 SV=3	1	1	3	3	6	6.69806	1.59797	24.305	5.60467	0.000539582	0.000640912	-0.22739	0.000641776	2.60377e-05	0.0013671	WT - Control	limma	0.000539582	0.000640912	TRUE	enriched hit	6.69806
BMH1	P29311	Protein BMH1 OS=Saccharomyces cerevisiae (strain ATCC 204508 / S288c) GN=BMH1 PE=1 SV=4	1	1	3	3	2	5.89313	1.5237	22.1444	5.53001	0.000588152	0.000697511	-0.320016	0.000757568	3.06302e-05	0.0013671	WT - Control	limma	0.000588152	0.000697511	TRUE	enriched hit	5.89313
PRS3	P38689	Ribose-phosphate pyrophosphokinase 3 OS=Saccharomyces cerevisiae (strain ATCC 204508 / S288c) GN=PRS3 PE=1 SV=1	1	1	3	3	3	6.09589	1.14932	21.5721	5.5147	0.000598701	0.000708914	-0.339119	0.000783608	3.16587e-05	0.0013671	WT - Control	limma	0.000598701	0.000708914	TRUE	enriched hit	6.09589
CBR1	P38626	NADH-cytochrome b5 reductase 1 OS=Saccharomyces cerevisiae (strain ATCC 204508 / S288c) GN=CBR1 PE=1 SV=2	1	1	3	3	2	6.29869	1.80327	21.6614	5.48077	0.000622811	0.000736314	-0.381541	0.000844257	3.4048e-05	0.0013671	WT - Control	limma	0.000622811	0.000736314	TRUE	enriched hit	6.29869
POR1	P04840	Mitochondrial outer membrane protein porin 1 OS=Saccharomyces cerevisiae (strain ATCC 204508 / S288c) GN=POR1 PE=1 SV=4	1	1	3	3	6	6.91363	2.15109	24.1238	5.4764	0.000625993	0.000738925	-0.387017	0.000852378	3.43672e-05	0.00143666	WT - Control	limma	0.000625993	0.000738925	TRUE	enriched hit	6.91363
ARP7	Q12406	Actin-related protein 7 OS=Saccharomyces cerevisiae (strain ATCC 204508 / S288c) GN=ARP7 PE=1 SV=1	1	1	3	3	3	6.07565	1.04249	23.1693	5.40694	0.000679061	0.000800322	-0.474441	0.000991613	3.98255e-05	0.00143666	WT - Control	limma	0.000679061	0.000800322	TRUE	enriched hit	6.07565
CIT1	P00890	Citrate synthase, mitochondrial OS=Saccharomyces cerevisiae (strain ATCC 204508 / S288c) GN=CIT1 PE=1 SV=2	1	1	3	3	7	7.46513	2.16748	24.5751	5.39645	0.000687499	0.000809011	-0.487708	0.00101439	4.07144e-05	0.00143666	WT - Control	limma	0.000687499	0.000809011	TRUE	enriched hit	7.46513
UBP7	P40453	Ubiquitin carboxyl-terminal hydrolase 7 OS=Saccharomyces cerevisiae (strain ATCC 204508 / S288c) GN=UBP7 PE=1 SV=1	1	1	3	3	3	5.74179	1.15789	21.489	5.38332	0.000698213	0.000820347	-0.504319	0.00104356	4.18508e-05	0.00143666	WT - Control	limma	0.000698213	0.000820347	TRUE	enriched hit	5.74179
NOT5	Q12514	General negative regulator of transcription subunit 5 OS=Saccharomyces cerevisiae (strain ATCC 204508 / S288c) GN=NOT5 PE=1 SV=1	1	1	3	3	4	6.12979	-2.13142	22.0667	-5.30794	0.00076343	0.000894344	-0.600231	0.00122669	4.8945e-05	0.00143666	WT - Control	limma	0.00076343	0.000894344	FALSE	no hit	6.12979
YBT1	P32386	ATP-dependent bile acid permease OS=Saccharomyces cerevisiae (strain ATCC 204508 / S288c) GN=YBT1 PE=1 SV=2	1	1	3	3	2	5.43458	1.44465	20.74	5.30651	0.000764729	0.000894344	-0.602056	0.00123043	4.90892e-05	0.00143666	WT - Control	limma	0.000764729	0.000894344	TRUE	enriched hit	5.43458
HYP2	P23301	Eukaryotic translation initiation factor 5A-1 OS=Saccharomyces cerevisiae (strain ATCC 204508 / S288c) GN=HYP2 PE=1 SV=3	1	1	3	3	3	5.87211	1.27976	21.1205	5.30227	0.000768592	0.000897479	-0.607468	0.00124158	4.95186e-05	0.00143666	WT - Control	limma	0.000768592	0.000897479	TRUE	enriched hit	5.87211
RPS5	P26783	40S ribosomal protein S5 OS=Saccharomyces cerevisiae (strain ATCC 204508 / S288c) GN=RPS5 PE=1 SV=3	1	1	3	3	5	7.20128	1.63694	24.5848	5.28711	0.000782602	0.000912435	-0.626867	0.00128227	5.10838e-05	0.00143666	WT - Control	limma	0.000782602	0.000912435	TRUE	enriched hit	7.20128
GPD1	Q00055	Glycerol-3-phosphate dehydrogenase [NAD(+)] 1 OS=Saccharomyces cerevisiae (strain ATCC 204508 / S288c) GN=GPD1 PE=1 SV=4	1	1	3	3	2	6.62007	2.31985	22.2006	5.2797	0.000789549	0.000919122	-0.636357	0.00130259	5.18643e-05	0.00143666	WT - Control	limma	0.000789549	0.000919122	TRUE	enriched hit	6.62007
FAA1	P30624	Long-chain-fatty-acid--CoA ligase 1 OS=Saccharomyces cerevisiae (strain ATCC 204508 / S288c) GN=FAA1 PE=1 SV=1	1	1	3	3	9	6.60049	2.161	24.0123	5.23753	0.000830412	0.000965211	-0.690539	0.00142409	5.65115e-05	0.00143666	WT - Control	limma	0.000830412	0.000965211	TRUE	enriched hit	6.60049
VID27	P40157	Vacuolar import and degradation protein 27 OS=Saccharomyces cerevisiae (strain ATCC 204508 / S288c) GN=VID27 PE=1 SV=1	1	1	3	3	2	5.47293	1.21712	20.5461	5.23568	0.000832254	0.000965873	-0.692918	0.00142964	5.67231e-05	0.00143666	WT - Control	limma	0.000832254	0.000965873	TRUE	enriched hit	5.47293
ADY3	Q07732	Accumulates dyads protein 3 OS=Saccharomyces cerevisiae (strain ATCC 204508 / S288c) GN=ADY3 PE=1 SV=2	1	1	3	3	2	5.91835	2.923	20.0978	5.2035	0.000865073	0.00100243	-0.734441	0.00152964	6.05235e-05	0.00143666	WT - Control	limma	0.000865073	0.00100243	TRUE	enriched hit	5.91835
SUB2	Q07478	ATP-dependent RNA helicase SUB2 OS=Saccharomyces cerevisiae (strain ATCC 204508 / S288c) GN=SUB2 PE=1 SV=1	1	1	3	3	3	5.83327	1.26974	22.7159	5.19061	0.000878624	0.00101509	-0.751128	0.0015715	6.21082e-05	0.00143666	WT - Control	limma	0.000878624	0.00101509	TRUE	enriched hit	5.83327
RPL34B|RPL34A	P40525|P87262	60S ribosomal protein L34-B OS=Saccharomyces cerevisiae (strain ATCC 204508 / S288c) GN=RPL34B PE=1 SV=1|60S ribosomal protein L34-A OS=Saccharomyces cerevisiae (strain ATCC 204508 / S288c) GN=RPL34A PE=1 SV=1	1	1	3	3	6	8.2014	3.93694	26.237	5.19056	0.000878677	0.00101509	-0.751192	0.00157166	6.21144e-05	0.00151138	WT - Control	limma	0.000878677	0.00101509	TRUE	enriched hit	8.2014
FAA4	P47912	Long-chain-fatty-acid--CoA ligase 4 OS=Saccharomyces cerevisiae (strain ATCC 204508 / S288c) GN=FAA4 PE=1 SV=1	1	1	3	3	3	5.87835	1.82944	21.0907	5.14344	0.000930193	0.00107297	-0.812348	0.00173371	6.82296e-05	0.00151138	WT - Control	limma	0.000930193	0.00107297	TRUE	enriched hit	5.87835
YGL081W	P53156	Uncharacterized protein YGL081W OS=Saccharomyces cerevisiae (strain ATCC 204508 / S288c) GN=YGL081W PE=3 SV=1	1	1	3	3	2	5.62605	1.8565	19.9027	5.14059	0.000933412	0.00107505	-0.816055	0.00174398	6.86155e-05	0.00151138	WT - Control	limma	0.000933412	0.00107505	TRUE	enriched hit	5.62605
GCN5	Q03330	Histone acetyltransferase GCN5 OS=Saccharomyces cerevisiae (strain ATCC 204508 / S288c) GN=GCN5 PE=1 SV=1	1	1	3	3	2	5.59375	1.18563	20.3731	5.12377	0.00095267	0.00109557	-0.837972	0.00180579	7.09333e-05	0.00151138	WT - Control	limma	0.00095267	0.00109557	TRUE	enriched hit	5.59375
SNC2	P33328	Synaptobrevin homolog 2 OS=Saccharomyces cerevisiae (strain ATCC 204508 / S288c) GN=SNC2 PE=1 SV=2	1	1	3	3	2	6.4142	-1.99666	21.2406	-5.09891	0.00098194	0.00112752	-0.870446	0.00190086	7.44835e-05	0.00151138	WT - Control	limma	0.00098194	0.00112752	FALSE	no hit	6.4142
ERG13	P54839	Hydroxymethylglutaryl-CoA synthase OS=Saccharomyces cerevisiae (strain ATCC 204508 / S288c) GN=ERG13 PE=1 SV=1	1	1	3	3	9	6.91677	1.55728	25.0527	5.09348	0.000988465	0.0011333	-0.877553	0.00192223	7.52793e-05	0.00151138	WT - Control	limma	0.000988465	0.0011333	TRUE	enriched hit	6.91677
SPO22	P40511	Sporulation-specific protein 22 OS=Saccharomyces cerevisiae (strain ATCC 204508 / S288c) GN=SPO22 PE=3 SV=2	1	1	3	3	2	5.88453	1.30019	21.3495	5.08105	0.00100357	0.00114888	-0.893825	0.00197195	7.71271e-05	0.00151138	WT - Control	limma	0.00100357	0.00114888	TRUE	enriched hit	5.88453
RPS1B	P23248	40S ribosomal protein S1-B OS=Saccharomyces cerevisiae (strain ATCC 204508 / S288c) GN=RPS1B PE=1 SV=3	1	1	3	3	2	6.50204	2.17555	19.6759	5.07928	0.00100574	0.00114963	-0.896139	0.00197911	7.73928e-05	0.00151473	WT - Control	limma	0.00100574	0.00114963	TRUE	enriched hit	6.50204
SBP1	P10080	Single-stranded nucleic acid-binding protein OS=Saccharomyces cerevisiae (strain ATCC 204508 / S288c) GN=SBP1 PE=1 SV=2	1	1	3	3	2	6.02399	1.42248	21.0035	5.05165	0.00104033	0.00118738	-0.932421	0.00209434	8.1656e-05	0.00151473	WT - Control	limma	0.00104033	0.00118738	TRUE	enriched hit	6.02399
SMC5	Q08204	Structural maintenance of chromosomes protein 5 OS=Saccharomyces cerevisiae (strain ATCC 204508 / S288c) GN=SMC5 PE=1 SV=1	1	1	3	3	4	5.72308	1.0604	21.7388	5.03867	0.00105702	0.00120402	-0.949497	0.00215055	8.37263e-05	0.00151473	WT - Control	limma	0.00105702	0.00120402	TRUE	enriched hit	5.72308
GUT2	P32191	Glycerol-3-phosphate dehydrogenase, mitochondrial OS=Saccharomyces cerevisiae (strain ATCC 204508 / S288c) GN=GUT2 PE=1 SV=2	1	1	3	3	5	6.38104	1.50187	23.6834	5.03785	0.00105808	0.00120402	-0.950567	0.00215412	8.38575e-05	0.00231626	WT - Control	limma	0.00105808	0.00120402	TRUE	enriched hit	6.38104
CAT2	P32796|P32796-2	Carnitine O-acetyltransferase, mitochondrial OS=Saccharomyces cerevisiae (strain ATCC 204508 / S288c) GN=CAT2 PE=1 SV=2|Isoform Peroxisomal of Carnitine O-acetyltransferase, mitochondrial OS=Saccharomyces cerevisiae (strain ATCC 204508 / S288c) GN=CAT2	1	1	3	3	10	6.73949	1.74019	23.5171	5.01791	0.00108433	0.00123204	-0.976857	0.00224332	8.71995e-05	0.00250187	WT - Control	limma	0.00108433	0.00123204	TRUE	enriched hit	6.73949
RPS27A|RPS27B	P35997|P38711	40S ribosomal protein S27-A OS=Saccharomyces cerevisiae (strain ATCC 204508 / S288c) GN=RPS27A PE=1 SV=1|40S ribosomal protein S27-B OS=Saccharomyces cerevisiae (strain ATCC 204508 / S288c) GN=RPS27B PE=1 SV=1	1	1	3	3	3	6.64401	1.45076	23.3798	4.94466	0.00118704	0.00134673	-1.07391	0.00260079	0.000100536	0.00250187	WT - Control	limma	0.00118704	0.00134673	TRUE	enriched hit	6.64401
IDH1	P28834	Isocitrate dehydrogenase [NAD] subunit 1, mitochondrial OS=Saccharomyces cerevisiae (strain ATCC 204508 / S288c) GN=IDH1 PE=1 SV=2	1	1	3	3	4	5.76468	1.49729	22.1015	4.92799	0.00121188	0.00137142	-1.09611	0.0026891	0.000103808	0.00250187	WT - Control	limma	0.00121188	0.00137142	TRUE	enriched hit	5.76468
CWP1	P28319	Cell wall protein CWP1 OS=Saccharomyces cerevisiae (strain ATCC 204508 / S288c) GN=CWP1 PE=1 SV=2	1	1	3	3	3	6.97067	1.65767	23.5721	4.92664	0.00121391	0.00137142	-1.09791	0.00269637	0.000104077	0.00250187	WT - Control	limma	0.00121391	0.00137142	TRUE	enriched hit	6.97067
ILV2	P07342	Acetolactate synthase catalytic subunit, mitochondrial OS=Saccharomyces cerevisiae (strain ATCC 204508 / S288c) GN=ILV2 PE=1 SV=1	1	1	3	3	2	5.80883	1.29217	20.9638	4.92643	0.00121422	0.00137142	-1.09818	0.00269749	0.000104118	0.00250187	WT - Control	limma	0.00121422	0.00137142	TRUE	enriched hit	5.80883
SEC4	P07560	Ras-related protein SEC4 OS=Saccharomyces cerevisiae (strain ATCC 204508 / S288c) GN=SEC4 PE=1 SV=1	1	1	3	3	2	6.01112	2.16703	21.124	4.92134	0.00122194	0.00137809	-1.10498	0.00272509	0.000105139	0.00586643	WT - Control	limma	0.00122194	0.00137809	TRUE	enriched hit	6.01112
RPL8A	P17076	60S ribosomal protein L8-A OS=Saccharomyces cerevisiae (strain ATCC 204508 / S288c) GN=RPL8A PE=1 SV=4	1	1	3	3	2	6.81874	1.92865	21.9945	4.81377	0.00139809	0.0015744	-1.24929	0.00337171	0.000129536	0.00586643	WT - Control	limma	0.00139809	0.0015744	TRUE	enriched hit	6.81874
AIM45	Q12480	Probable electron transfer flavoprotein subunit alpha, mitochondrial OS=Saccharomyces cerevisiae (strain ATCC 204508 / S288c) GN=AIM45 PE=1 SV=1	1	1	3	3	3	5.47869	1.31124	20.5934	4.73439	0.0015458	0.00173588	-1.35686	0.00393525	0.00015063	0.00586643	WT - Control	limma	0.0015458	0.00173588	TRUE	enriched hit	5.47869
DMA2	P53924	E3 ubiquitin-protein ligase DMA2 OS=Saccharomyces cerevisiae (strain ATCC 204508 / S288c) GN=DMA2 PE=1 SV=1	1	1	3	3	2	6.86559	2.38713	21.8444	4.73427	0.00154605	0.00173588	-1.35703	0.00393622	0.000150666	0.00586643	WT - Control	limma	0.00154605	0.00173588	TRUE	enriched hit	6.86559
YPT7	P32939	GTP-binding protein YPT7 OS=Saccharomyces cerevisiae (strain ATCC 204508 / S288c) GN=YPT7 PE=1 SV=1	1	1	3	3	2	5.90824	1.343	22.2974	4.71643	0.00158154	0.0017731	-1.38133	0.00407409	0.000155804	0.00586643	WT - Control	limma	0.00158154	0.0017731	TRUE	enriched hit	5.90824
RPS29A	P41057	40S ribosomal protein S29-A OS=Saccharomyces cerevisiae (strain ATCC 204508 / S288c) GN=RPS29A PE=1 SV=3	1	1	3	3	2	6.50737	1.29369	23.2002	4.68041	0.00165595	0.00185378	-1.43054	0.00436598	0.000166649	0.00586643	WT - Control	limma	0.00165595	0.00185378	TRUE	enriched hit	6.50737
RAS2	P01120	Ras-like protein 2 OS=Saccharomyces cerevisiae (strain ATCC 204508 / S288c) GN=RAS2 PE=1 SV=4	1	1	3	3	4	5.80414	1.21779	21.2507	4.6789	0.00165915	0.00185463	-1.43261	0.00437864	0.000167119	0.00586643	WT - Control	limma	0.00165915	0.00185463	TRUE	enriched hit	5.80414
TPS2	P31688	Trehalose-phosphatase OS=Saccharomyces cerevisiae (strain ATCC 204508 / S288c) GN=TPS2 PE=1 SV=3	1	1	3	3	5	6.39946	1.32031	23.0217	4.66745	0.00168366	0.00187926	-1.4483	0.00447561	0.000170712	0.00586643	WT - Control	limma	0.00168366	0.00187926	TRUE	enriched hit	6.39946
YJR005C-A	Q3E827	Uncharacterized protein YJR005C-A OS=Saccharomyces cerevisiae (strain ATCC 204508 / S288c) GN=YJR005C-A PE=4 SV=1	1	1	3	3	2	5.96664	2.18055	21.5649	4.66083	0.001698	0.00189249	-1.45738	0.00453254	0.000172819	0.00681593	WT - Control	limma	0.001698	0.00189249	TRUE	enriched hit	5.96664
GDH1	P07262	NADP-specific glutamate dehydrogenase 1 OS=Saccharomyces cerevisiae (strain ATCC 204508 / S288c) GN=GDH1 PE=1 SV=2	1	1	3	3	2	5.61133	1.09086	20.1571	4.63125	0.00176374	0.00196287	-1.49802	0.00479504	0.00018256	0.0083172	WT - Control	limma	0.00176374	0.00196287	TRUE	enriched hit	5.61133
RGI2	P40188	Respiratory growth induced protein 2 OS=Saccharomyces cerevisiae (strain ATCC 204508 / S288c) GN=RGI2 PE=1 SV=1	1	1	3	3	6	6.86607	3.124	24.3349	4.54347	0.00197569	0.00219553	-1.61937	0.00565697	0.00021453	0.0083172	WT - Control	limma	0.00197569	0.00219553	TRUE	enriched hit	6.86607
TUF1	P02992	Elongation factor Tu, mitochondrial OS=Saccharomyces cerevisiae (strain ATCC 204508 / S288c) GN=TUF1 PE=1 SV=1	1	1	3	3	3	5.76481	1.06966	22.4892	4.53955	0.00198577	0.00220351	-1.62481	0.00569851	0.000216064	0.0083172	WT - Control	limma	0.00198577	0.00220351	TRUE	enriched hit	5.76481
GND1	P38720	6-phosphogluconate dehydrogenase, decarboxylating 1 OS=Saccharomyces cerevisiae (strain ATCC 204508 / S288c) GN=GND1 PE=1 SV=1	1	1	3	3	2	5.47185	1.25475	20.1893	4.52913	0.00201286	0.00223031	-1.63929	0.00581032	0.000220191	0.0083172	WT - Control	limma	0.00201286	0.00223031	TRUE	enriched hit	5.47185
YNL115C	P53925	Uncharacterized vacuolar membrane protein YNL115C OS=Saccharomyces cerevisiae (strain ATCC 204508 / S288c) GN=YNL115C PE=1 SV=1	1	1	3	3	2	5.88222	1.17882	21.4825	4.49017	0.00211778	0.00234314	-1.69359	0.00624616	0.000236239	0.0083172	WT - Control	limma	0.00211778	0.00234314	TRUE	enriched hit	5.88222
SEC53	P07283	Phosphomannomutase OS=Saccharomyces cerevisiae (strain ATCC 204508 / S288c) GN=SEC53 PE=1 SV=1	1	1	3	3	3	5.96758	1.03494	21.6779	4.47729	0.00215376	0.00237949	-1.71159	0.00639662	0.000241764	0.012365	WT - Control	limma	0.00215376	0.00237949	TRUE	enriched hit	5.96758
SSC1	P0CS90	Heat shock protein SSC1, mitochondrial OS=Saccharomyces cerevisiae (strain ATCC 204508 / S288c) GN=SSC1 PE=1 SV=1	1	1	3	3	13	6.92873	1.75551	24.5381	4.43824	0.00226697	0.00250091	-1.7663	0.00687282	0.000259385	0.0141567	WT - Control	limma	0.00226697	0.00250091	TRUE	enriched hit	6.92873
DIS3	Q08162	Exosome complex exonuclease DIS3 OS=Saccharomyces cerevisiae (strain ATCC 204508 / S288c) GN=DIS3 PE=1 SV=1	1	1	3	3	2	5.74604	1.18449	20.7747	4.37282	0.00247134	0.00272242	-1.85844	0.0077423	0.000291524	0.0141567	WT - Control	limma	0.00247134	0.00272242	TRUE	enriched hit	5.74604
SRP54	P20424	Signal recognition particle subunit SRP54 OS=Saccharomyces cerevisiae (strain ATCC 204508 / S288c) GN=SRP54 PE=1 SV=2	1	1	3	3	3	5.82601	1.60389	22.0941	4.33857	0.00258628	0.00284491	-1.90694	0.00823591	0.000309704	0.0141567	WT - Control	limma	0.00258628	0.00284491	TRUE	enriched hit	5.82601
CDS1	P38221	Phosphatidate cytidylyltransferase OS=Saccharomyces cerevisiae (strain ATCC 204508 / S288c) GN=CDS1 PE=1 SV=1	1	1	3	3	2	5.79281	2.3165	20.1686	4.30335	0.00271051	0.00297724	-1.95697	0.00877253	0.000329413	0.0141567	WT - Control	limma	0.00271051	0.00297724	TRUE	enriched hit	5.79281
SUP45	P12385	Eukaryotic peptide chain release factor subunit 1 OS=Saccharomyces cerevisiae (strain ATCC 204508 / S288c) GN=SUP45 PE=1 SV=2	1	1	3	3	6	6.18436	1.57855	23.3427	4.25829	0.00287895	0.00315769	-2.02123	0.00950451	0.000356208	0.0141567	WT - Control	limma	0.00287895	0.00315769	TRUE	enriched hit	6.18436
PUF6	Q04373	Pumilio homology domain family member 6 OS=Saccharomyces cerevisiae (strain ATCC 204508 / S288c) GN=PUF6 PE=1 SV=1	1	1	3	3	5	6.47871	2.32494	23.2709	4.22077	0.00302788	0.00331625	-2.07496	0.0101552	0.000379938	0.0141567	WT - Control	limma	0.00302788	0.00331625	TRUE	enriched hit	6.47871
MRPL40	P36534	54S ribosomal protein L40, mitochondrial OS=Saccharomyces cerevisiae (strain ATCC 204508 / S288c) GN=MRPL40 PE=1 SV=2	1	1	3	3	3	6.0491	1.33279	21.3242	4.15243	0.00332095	0.00363199	-2.17332	0.0114426	0.000426653	0.0141567	WT - Control	limma	0.00332095	0.00363199	TRUE	enriched hit	6.0491
SPT6	P23615	Transcription elongation factor SPT6 OS=Saccharomyces cerevisiae (strain ATCC 204508 / S288c) GN=SPT6 PE=1 SV=1	1	1	3	3	3	5.72498	1.88236	21.5767	4.15004	0.00333175	0.00363856	-2.17677	0.0114901	0.000428373	0.0141567	WT - Control	limma	0.00333175	0.00363856	TRUE	enriched hit	5.72498
TSA1	P34760	Peroxiredoxin TSA1 OS=Saccharomyces cerevisiae (strain ATCC 204508 / S288c) GN=TSA1 PE=1 SV=3	1	1	3	3	2	6.49176	1.43599	22.9083	4.14181	0.00336919	0.00367416	-2.18867	0.0116552	0.000434337	0.0141567	WT - Control	limma	0.00336919	0.00367416	TRUE	enriched hit	6.49176
PDB1	P32473	Pyruvate dehydrogenase E1 component subunit beta, mitochondrial OS=Saccharomyces cerevisiae (strain ATCC 204508 / S288c) GN=PDB1 PE=1 SV=2	1	1	3	3	3	6.23956	0.983641	21.883	4.13567	0.00339743	0.00369964	-2.19755	0.0117797	0.000438834	0.0199803	WT - Control	limma	0.00339743	0.00369964	FALSE	enriched candidate	6.23956
PDR16	P53860	Phosphatidylinositol transfer protein PDR16 OS=Saccharomyces cerevisiae (strain ATCC 204508 / S288c) GN=PDR16 PE=1 SV=1	1	1	3	3	3	6.0754	1.08129	22.3789	4.06992	0.00371628	0.00404105	-2.29293	0.0131886	0.000490033	0.0199803	WT - Control	limma	0.00371628	0.00404105	TRUE	enriched hit	6.0754
MSH2	P25847	DNA mismatch repair protein MSH2 OS=Saccharomyces cerevisiae (strain ATCC 204508 / S288c) GN=MSH2 PE=1 SV=2	1	1	3	3	8	6.13965	1.56601	23.7331	4.02766	0.00393821	0.00427263	-2.35456	0.0141712	0.000525581	0.0199803	WT - Control	limma	0.00393821	0.00427263	TRUE	enriched hit	6.13965
RRF1	P38771	Ribosome-recycling factor, mitochondrial OS=Saccharomyces cerevisiae (strain ATCC 204508 / S288c) GN=RRF1 PE=1 SV=1	1	1	3	3	4	5.94683	2.1033	22.0293	4.02723	0.00394051	0.00427263	-2.35518	0.0141814	0.000525948	0.0199803	WT - Control	limma	0.00394051	0.00427263	TRUE	enriched hit	5.94683
KRS1	P15180	Lysine--tRNA ligase, cytoplasmic OS=Saccharomyces cerevisiae (strain ATCC 204508 / S288c) GN=KRS1 PE=1 SV=2	1	1	3	3	3	6.1756	1.72033	22.6527	3.99964	0.00409319	0.00443185	-2.39555	0.0148577	0.00055034	0.0201235	WT - Control	limma	0.00409319	0.00443185	TRUE	enriched hit	6.1756
HIR1	P32479	Protein HIR1 OS=Saccharomyces cerevisiae (strain ATCC 204508 / S288c) GN=HIR1 PE=1 SV=3	1	1	3	3	5	6.13171	1.88637	23.1663	3.94904	0.00438991	0.00474636	-2.46982	0.0161717	0.000597568	0.0201235	WT - Control	limma	0.00438991	0.00474636	TRUE	enriched hit	6.13171
GSY1	P23337	Glycogen [starch] synthase isoform 1 OS=Saccharomyces cerevisiae (strain ATCC 204508 / S288c) GN=GSY1 PE=1 SV=3	1	1	3	3	2	5.81332	1.713	21.4051	3.91222	0.00462039	0.00498844	-2.52408	0.0171913	0.000634055	0.0201235	WT - Control	limma	0.00462039	0.00498844	TRUE	enriched hit	5.81332
IMG2	P25642	54S ribosomal protein IMG2, mitochondrial OS=Saccharomyces cerevisiae (strain ATCC 204508 / S288c) GN=IMG2 PE=1 SV=2	1	1	3	3	3	5.64162	0.957557	21.5555	3.89652	0.0047226	0.00509156	-2.54727	0.0176429	0.000650175	0.0201235	WT - Control	limma	0.0047226	0.00509156	FALSE	enriched candidate	5.64162
PET10	P36139	Protein PET10 OS=Saccharomyces cerevisiae (strain ATCC 204508 / S288c) GN=PET10 PE=1 SV=3	1	1	3	3	4	5.87229	1.79005	21.7385	3.86364	0.00494455	0.00532328	-2.59593	0.0186223	0.000685039	0.0201235	WT - Control	limma	0.00494455	0.00532328	TRUE	enriched hit	5.87229
DMC1	P25453	Meiotic recombination protein DMC1 OS=Saccharomyces cerevisiae (strain ATCC 204508 / S288c) GN=DMC1 PE=1 SV=1	1	1	3	3	2	6.41601	1.5589	22.427	3.86003	0.00496959	0.00534266	-2.60128	0.0187327	0.00068896	0.029087	WT - Control	limma	0.00496959	0.00534266	TRUE	enriched hit	6.41601
ACS2	P52910	Acetyl-coenzyme A synthetase 2 OS=Saccharomyces cerevisiae (strain ATCC 204508 / S288c) GN=ACS2 PE=1 SV=1	1	1	3	3	4	6.64322	1.2336	22.8925	3.81943	0.00526087	0.00564781	-2.66158	0.0200143	0.000734905	0.029087	WT - Control	limma	0.00526087	0.00564781	TRUE	enriched hit	6.64322
TGS1	Q12052	Trimethylguanosine synthase OS=Saccharomyces cerevisiae (strain ATCC 204508 / S288c) GN=TGS1 PE=1 SV=1	1	1	3	3	2	5.59684	1.91414	20.3583	3.7619	0.00570533	0.00611631	-2.74737	0.0219609	0.000804404	0.029087	WT - Control	limma	0.00570533	0.00611631	TRUE	enriched hit	5.59684
ATP3	P38077	ATP synthase subunit gamma, mitochondrial OS=Saccharomyces cerevisiae (strain ATCC 204508 / S288c) GN=ATP3 PE=1 SV=1	1	1	3	3	6	6.20873	1.22942	22.7927	3.66951	0.00650541	0.00696418	-2.88596	0.0254319	0.000927489	0.029087	WT - Control	limma	0.00650541	0.00696418	TRUE	enriched hit	6.20873
PIN2	Q12057	[PSI+] induction protein 2 OS=Saccharomyces cerevisiae (strain ATCC 204508 / S288c) GN=PIN2 PE=1 SV=1	1	1	3	3	2	6.05621	-2.97442	20.4522	-3.65985	0.00835529	0.00884472	-2.96945	0.0258209	0.000941219	0.029087	WT - Control	limma	0.00835529	0.00884472	FALSE	no hit	6.05621
RLP7	P40693	Ribosome biogenesis protein RLP7 OS=Saccharomyces cerevisiae (strain ATCC 204508 / S288c) GN=RLP7 PE=1 SV=1	1	1	3	3	2	5.78272	1.33912	20.3623	3.63966	0.00678896	0.00725749	-2.93096	0.0266507	0.000970455	0.029087	WT - Control	limma	0.00678896	0.00725749	TRUE	enriched hit	5.78272
YPT1	P01123	GTP-binding protein YPT1 OS=Saccharomyces cerevisiae (strain ATCC 204508 / S288c) GN=YPT1 PE=1 SV=2	1	1	3	3	5	6.5017	1.3156	23.6213	3.63221	0.00686169	0.00732493	-2.94219	0.0269623	0.000981419	0.029087	WT - Control	limma	0.00686169	0.00732493	TRUE	enriched hit	6.5017
SNF1	P06782	Carbon catabolite-derepressing protein kinase OS=Saccharomyces cerevisiae (strain ATCC 204508 / S288c) GN=SNF1 PE=1 SV=1	1	1	3	3	3	6.4501	0.900969	22.5107	3.6299	0.00688444	0.00733889	-2.94568	0.0270597	0.000984844	0.029087	WT - Control	limma	0.00688444	0.00733889	FALSE	enriched candidate	6.4501
IST1	P53843	Vacuolar protein sorting-associated protein IST1 OS=Saccharomyces cerevisiae (strain ATCC 204508 / S288c) GN=IST1 PE=1 SV=1	1	1	3	3	3	5.76556	1.19772	21.7864	3.61109	0.00707267	0.00752897	-2.97411	0.0278638	0.00101309	0.029087	WT - Control	limma	0.00707267	0.00752897	TRUE	enriched hit	5.76556
EHT1	P38295	Medium-chain fatty acid ethyl ester synthase/esterase 2 OS=Saccharomyces cerevisiae (strain ATCC 204508 / S288c) GN=EHT1 PE=1 SV=1	1	1	3	3	2	5.9868	1.73684	20.9532	3.54714	0.00775456	0.0082433	-3.07101	0.0307528	0.00111411	0.029087	WT - Control	limma	0.00775456	0.0082433	TRUE	enriched hit	5.9868
SSA1	P10591	Heat shock protein SSA1 OS=Saccharomyces cerevisiae (strain ATCC 204508 / S288c) GN=SSA1 PE=1 SV=4	1	1	3	3	3	6.11874	1.08026	21.4933	3.54173	0.00781538	0.00829632	-3.07923	0.0310086	0.00112302	0.029087	WT - Control	limma	0.00781538	0.00829632	TRUE	enriched hit	6.11874
NCE102	Q12207	Non-classical export protein 2 OS=Saccharomyces cerevisiae (strain ATCC 204508 / S288c) GN=NCE102 PE=1 SV=1	1	1	3	3	2	6.0118	0.81597	19.0909	3.54076	0.00782642	0.00829644	-3.08072	0.031055	0.00112463	0.110963	WT - Control	limma	0.00782642	0.00829644	FALSE	enriched candidate	6.0118
SHE10	P53075	Outer spore wall assembly protein SHE10 OS=Saccharomyces cerevisiae (strain ATCC 204508 / S288c) GN=SHE10 PE=1 SV=1	1	1	3	3	2	5.95083	2.38641	22.2139	3.42153	0.00930638	0.0098378	-3.26262	0.0371824	0.00134384	0.110963	WT - Control	limma	0.00930638	0.0098378	TRUE	enriched hit	5.95083
SPA2	P23201	Protein SPA2 OS=Saccharomyces cerevisiae (strain ATCC 204508 / S288c) GN=SPA2 PE=1 SV=1	1	1	3	3	2	5.65216	-2.83639	20.655	-3.36668	0.0100845	0.0106455	-3.34675	0.04033	0.00145611	0.110963	WT - Control	limma	0.0100845	0.0106455	FALSE	no hit	5.65216
TED1	P40533	Protein TED1 OS=Saccharomyces cerevisiae (strain ATCC 204508 / S288c) GN=TED1 PE=1 SV=1	1	1	3	3	2	5.57807	2.40767	20.1559	3.30909	0.0109762	0.0115707	-3.43539	0.0438754	0.00158229	0.156998	WT - Control	limma	0.0109762	0.0115707	TRUE	enriched hit	5.57807
RPS0A	P32905	40S ribosomal protein S0-A OS=Saccharomyces cerevisiae (strain ATCC 204508 / S288c) GN=RPS0A PE=1 SV=3	1	1	3	3	4	6.76653	0.899353	23.0184	3.17657	0.0133596	0.0140637	-3.64034	0.0530426	0.00190887	0.156998	WT - Control	limma	0.0133596	0.0140637	FALSE	enriched candidate	6.76653
RPL10	P41805	60S ribosomal protein L10 OS=Saccharomyces cerevisiae (strain ATCC 204508 / S288c) GN=RPL10 PE=1 SV=1	1	1	3	3	11	7.77554	1.74378	25.9202	3.0268	0.0167226	0.0175796	-3.87336	0.0652769	0.00234259	0.156998	WT - Control	limma	0.0167226	0.0175796	TRUE	enriched hit	7.77554
CPR1	P14832	Peptidyl-prolyl cis-trans isomerase OS=Saccharomyces cerevisiae (strain ATCC 204508 / S288c) GN=CPR1 PE=1 SV=3	1	1	3	3	2	5.66184	1.10868	20.9204	3.00933	0.0171689	0.0180238	-3.90061	0.0668443	0.00239798	0.156998	WT - Control	limma	0.0171689	0.0180238	TRUE	enriched hit	5.66184
SAM2	P19358	S-adenosylmethionine synthase 2 OS=Saccharomyces cerevisiae (strain ATCC 204508 / S288c) GN=SAM2 PE=1 SV=3	1	1	3	3	2	5.64118	1.24315	19.8736	2.9722	0.0181595	0.0190373	-3.95858	0.0702789	0.00251921	0.156998	WT - Control	limma	0.0181595	0.0190373	TRUE	enriched hit	5.64118
SPO14	P36126	Phospholipase D1 OS=Saccharomyces cerevisiae (strain ATCC 204508 / S288c) GN=SPO14 PE=1 SV=3	1	1	3	3	5	6.25363	0.824987	22.915	2.88264	0.0208019	0.0217774	-4.09859	0.0791623	0.0028319	0.156998	WT - Control	limma	0.0208019	0.0217774	FALSE	enriched candidate	6.25363
IES1	P43579	Ino eighty subunit 1 OS=Saccharomyces cerevisiae (strain ATCC 204508 / S288c) GN=IES1 PE=1 SV=1	1	1	3	3	2	5.89964	1.37944	21.9004	2.83403	0.0224008	0.0234191	-4.17467	0.084355	0.00301409	0.156998	WT - Control	limma	0.0224008	0.0234191	TRUE	enriched hit	5.89964
ATG8	P38182	Autophagy-related protein 8 OS=Saccharomyces cerevisiae (strain ATCC 204508 / S288c) GN=ATG8 PE=1 SV=1	1	1	3	3	2	5.65636	0.93321	22.0002	2.77496	0.0245162	0.0255953	-4.26714	0.0910307	0.00324769	0.156998	WT - Control	limma	0.0245162	0.0255953	FALSE	enriched candidate	5.65636
TDH1	P00360	Glyceraldehyde-3-phosphate dehydrogenase 1 OS=Saccharomyces cerevisiae (strain ATCC 204508 / S288c) GN=TDH1 PE=1 SV=3	1	1	3	3	4	6.18776	1.10874	22.5623	2.73556	0.0260411	0.02715	-4.32882	0.0957155	0.0034112	0.156998	WT - Control	limma	0.0260411	0.02715	TRUE	enriched hit	6.18776
TPI1	P00942	Triosephosphate isomerase OS=Saccharomyces cerevisiae (strain ATCC 204508 / S288c) GN=TPI1 PE=1 SV=2	1	1	3	3	3	6.10107	0.723989	22.3331	2.71453	0.0268945	0.0280013	-4.36173	0.098293	0.00350101	0.174931	WT - Control	limma	0.0268945	0.0280013	FALSE	enriched candidate	6.10107
RPB4	P20433	DNA-directed RNA polymerase II subunit RPB4 OS=Saccharomyces cerevisiae (strain ATCC 204508 / S288c) GN=RPB4 PE=1 SV=1	1	1	3	3	2	5.75178	1.03366	21.6488	2.57062	0.033562	0.0348953	-4.58672	0.117456	0.0041673	0.174931	WT - Control	limma	0.033562	0.0348953	TRUE	enriched hit	5.75178
FKS1	P38631	1,3-beta-glucan synthase component FKS1 OS=Saccharomyces cerevisiae (strain ATCC 204508 / S288c) GN=FKS1 PE=1 SV=2	1	1	3	3	2	5.52742	-1.00215	20.3543	-2.46442	0.0395476	0.0410236	-4.75216	0.133391	0.00471743	0.174931	WT - Control	limma	0.0395476	0.0410236	FALSE	no hit	5.52742
TIM44	Q01852	Mitochondrial import inner membrane translocase subunit TIM44 OS=Saccharomyces cerevisiae (strain ATCC 204508 / S288c) GN=TIM44 PE=1 SV=1	1	1	3	3	8	6.15308	1.19935	23.5998	2.46415	0.0395642	0.0410236	-4.75258	0.133434	0.0047189	0.174931	WT - Control	limma	0.0395642	0.0410236	TRUE	enriched hit	6.15308
ACF2	Q12168	Endo-1,3(4)-beta-glucanase 2 OS=Saccharomyces cerevisiae (strain ATCC 204508 / S288c) GN=ACF2 PE=1 SV=1	1	1	3	3	2	5.43146	0.843107	20.7354	2.44067	0.0410284	0.0424837	-4.78905	0.137174	0.00484751	0.174931	WT - Control	limma	0.0410284	0.0424837	FALSE	enriched candidate	5.43146
PEA2	P40091	Protein PEA2 OS=Saccharomyces cerevisiae (strain ATCC 204508 / S288c) GN=PEA2 PE=1 SV=1	1	1	3	3	4	6.35709	-1.75931	22.2257	-2.43683	0.0412727	0.0426785	-4.795	0.137793	0.00486877	0.174931	WT - Control	limma	0.0412727	0.0426785	FALSE	no hit	6.35709
MRPL25	P23369	54S ribosomal protein L25, mitochondrial OS=Saccharomyces cerevisiae (strain ATCC 204508 / S288c) GN=MRPL25 PE=1 SV=2	1	1	3	3	2	5.72661	0.833161	21.6633	2.43114	0.0416381	0.0429977	-4.80384	0.138715	0.00490044	0.369363	WT - Control	limma	0.0416381	0.0429977	FALSE	enriched candidate	5.72661
GVP36	P40531	Protein GVP36 OS=Saccharomyces cerevisiae (strain ATCC 204508 / S288c) GN=GVP36 PE=1 SV=1	1	1	3	3	8	7.04193	-2.13244	23.3783	-2.33275	0.0484933	0.0500087	-4.95602	0.155412	0.00548153	0.369363	WT - Control	limma	0.0484933	0.0500087	FALSE	no hit	7.04193
CYC1	P00044	Cytochrome c iso-1 OS=Saccharomyces cerevisiae (strain ATCC 204508 / S288c) GN=CYC1 PE=1 SV=2	1	1	3	3	2	5.67476	0.651165	21.2707	2.26455	0.0538996	0.0555085	-5.06088	0.167852	0.00591329	0.369363	WT - Control	limma	0.0538996	0.0555085	FALSE	enriched candidate	5.67476
CRH1	P53301	Probable glycosidase CRH1 OS=Saccharomyces cerevisiae (strain ATCC 204508 / S288c) GN=CRH1 PE=1 SV=1	1	1	3	3	2	5.83838	0.705319	21.0746	2.22385	0.0574075	0.0590411	-5.12314	0.175623	0.00618247	1	WT - Control	limma	0.0574075	0.0590411	FALSE	enriched candidate	5.83838
SSA3	P09435	Heat shock protein SSA3 OS=Saccharomyces cerevisiae (strain ATCC 204508 / S288c) GN=SSA3 PE=1 SV=3	1	1	3	3	3	5.9854	1.32082	21.3845	2.07928	0.0717988	0.0737419	-5.34213	0.205402	0.00722322	1	WT - Control	limma	0.0717988	0.0737419	FALSE	enriched candidate	5.9854
GPM1	P00950	Phosphoglycerate mutase 1 OS=Saccharomyces cerevisiae (strain ATCC 204508 / S288c) GN=GPM1 PE=1 SV=3	1	1	3	3	6	6.93328	0.898336	24.6829	1.9672	0.0853366	0.0875277	-5.50899	0.230897	0.0081125	1	WT - Control	limma	0.0853366	0.0875277	FALSE	enriched candidate	6.93328
HSP150	P32478	Cell wall mannoprotein HSP150 OS=Saccharomyces cerevisiae (strain ATCC 204508 / S288c) GN=HSP150 PE=1 SV=2	1	1	3	3	2	6.48953	0.63227	21.5232	1.70039	0.128135	0.131247	-5.89233	0.300409	0.0105291	1	WT - Control	limma	0.128135	0.131247	FALSE	enriched candidate	6.48953
RPS19A|RPS19B	P07280|P07281	40S ribosomal protein S19-A OS=Saccharomyces cerevisiae (strain ATCC 204508 / S288c) GN=RPS19A PE=1 SV=2|40S ribosomal protein S19-B OS=Saccharomyces cerevisiae (strain ATCC 204508 / S288c) GN=RPS19B PE=1 SV=2	1	1	3	3	3	6.19741	1.00024	21.7454	1.68662	0.130818	0.133815	-5.91146	0.30434	0.0106654	1	WT - Control	limma	0.130818	0.133815	FALSE	enriched candidate	6.19741
GAP1	P19145	General amino-acid permease GAP1 OS=Saccharomyces cerevisiae (strain ATCC 204508 / S288c) GN=GAP1 PE=1 SV=2	1	1	3	3	2	5.54062	-0.965515	20.8922	-1.67432	0.133258	0.136128	-5.92849	0.307879	0.0107881	1	WT - Control	limma	0.133258	0.136128	FALSE	no hit	5.54062
ADO1	P47143	Adenosine kinase OS=Saccharomyces cerevisiae (strain ATCC 204508 / S288c) GN=ADO1 PE=1 SV=1	1	1	3	3	2	5.84009	1.10271	21.7165	1.35272	0.213753	0.218062	-6.35001	0.410039	0.0143165	1	WT - Control	limma	0.213753	0.218062	FALSE	no hit	5.84009
LSP1	Q12230	Sphingolipid long chain base-responsive protein LSP1 OS=Saccharomyces cerevisiae (strain ATCC 204508 / S288c) GN=LSP1 PE=1 SV=1	1	1	3	3	3	6.18027	0.867684	22.4072	1.3493	0.214801	0.218838	-6.35422	0.411224	0.0143573	1	WT - Control	limma	0.214801	0.218838	FALSE	no hit	6.18027
FAS1	P07149	Fatty acid synthase subunit beta OS=Saccharomyces cerevisiae (strain ATCC 204508 / S288c) GN=FAS1 PE=1 SV=2	1	1	3	3	13	6.37996	0.493864	24.43	1.22663	0.255422	0.259873	-6.5004	0.455044	0.0158629	1	WT - Control	limma	0.255422	0.259873	FALSE	no hit	6.37996
MBF1	O14467	Multiprotein-bridging factor 1 OS=Saccharomyces cerevisiae (strain ATCC 204508 / S288c) GN=MBF1 PE=1 SV=2	1	1	3	3	8	7.00893	0.324767	25.232	1.03712	0.330516	0.335825	-6.70699	0.527634	0.018347	1	WT - Control	limma	0.330516	0.335825	FALSE	no hit	7.00893
SIS1	P25294	Protein SIS1 OS=Saccharomyces cerevisiae (strain ATCC 204508 / S288c) GN=SIS1 PE=1 SV=1	1	1	3	3	7	7.08422	-0.316005	24.0154	-0.74908	0.475618	0.482612	-6.96833	0.648247	0.0224468	1	WT - Control	limma	0.475618	0.482612	FALSE	no hit	7.08422
FAS2	P19097	Fatty acid synthase subunit alpha OS=Saccharomyces cerevisiae (strain ATCC 204508 / S288c) GN=FAS2 PE=1 SV=2	1	1	3	3	12	6.60894	0.38815	24.6893	0.728438	0.487469	0.493978	-6.98433	0.657312	0.0227536	1	WT - Control	limma	0.487469	0.493978	FALSE	no hit	6.60894
CAR1	P00812	Arginase OS=Saccharomyces cerevisiae (strain ATCC 204508 / S288c) GN=CAR1 PE=1 SV=1	1	1	3	3	3	6.31943	0.246115	22.6189	0.618294	0.553864	0.560511	-7.06294	0.706509	0.024415	1	WT - Control	limma	0.553864	0.560511	FALSE	no hit	6.31943
RPL12A|RPL12B	P0CX53|P0CX54	60S ribosomal protein L12-A OS=Saccharomyces cerevisiae (strain ATCC 204508 / S288c) GN=RPL12A PE=1 SV=1|60S ribosomal protein L12-B OS=Saccharomyces cerevisiae (strain ATCC 204508 / S288c) GN=RPL12B PE=1 SV=1	1	1	3	3	4	6.49969	0.169835	23.6423	0.534147	0.608006	0.614482	-7.11511	0.744952	0.0257093	1	WT - Control	limma	0.608006	0.614482	FALSE	no hit	6.49969
ASG1	P40467	Activator of stress genes 1 OS=Saccharomyces cerevisiae (strain ATCC 204508 / S288c) GN=ASG1 PE=1 SV=1	1	1	3	3	3	5.9207	0.383476	22.0341	0.499576	0.63105	0.636924	-7.1345	0.760939	0.0262466	1	WT - Control	limma	0.63105	0.636924	FALSE	no hit	5.9207
VID30	P53076	Vacuolar import and degradation protein 30 OS=Saccharomyces cerevisiae (strain ATCC 204508 / S288c) GN=VID30 PE=1 SV=1	1	1	3	3	2	5.74816	0.293515	21.8119	0.395158	0.70323	0.708833	-7.18558	0.809822	0.0278856	1	WT - Control	limma	0.70323	0.708833	FALSE	no hit	5.74816
ZEO1	Q08245	Protein ZEO1 OS=Saccharomyces cerevisiae (strain ATCC 204508 / S288c) GN=ZEO1 PE=1 SV=3	1	1	3	3	2	6.13518	0.105606	21.647	0.344247	0.739686	0.744591	-7.20633	0.83394	0.0286923	1	WT - Control	limma	0.739686	0.744591	FALSE	no hit	6.13518
PET123	P17558	37S ribosomal protein PET123, mitochondrial OS=Saccharomyces cerevisiae (strain ATCC 204508 / S288c) GN=PET123 PE=1 SV=1	1	1	3	3	2	6.65245	-0.103043	22.9602	-0.325972	0.752951	0.756941	-7.2131	0.842638	0.0289829	1	WT - Control	limma	0.752951	0.756941	FALSE	no hit	6.65245
INP52	P50942	Polyphosphatidylinositol phosphatase INP52 OS=Saccharomyces cerevisiae (strain ATCC 204508 / S288c) GN=INP52 PE=1 SV=1	1	1	3	3	4	5.74799	0.147434	22.1657	0.280796	0.786113	0.789233	-7.2283	0.864217	0.0297031	1	WT - Control	limma	0.786113	0.789233	FALSE	no hit	5.74799
RPL26B	P53221	60S ribosomal protein L26-B OS=Saccharomyces cerevisiae (strain ATCC 204508 / S288c) GN=RPL26B PE=1 SV=2	1	1	3	3	8	7.31145	-0.0657424	25.5543	-0.254482	0.805651	0.80778	-7.23613	0.876835	0.0301237	1	WT - Control	limma	0.805651	0.80778	FALSE	no hit	7.31145
SSO1	P32867	Protein SSO1 OS=Saccharomyces cerevisiae (strain ATCC 204508 / S288c) GN=SSO1 PE=1 SV=2	1	1	3	3	2	5.87225	-0.0675052	21.9883	-0.155984	0.879976	0.881137	-7.25868	0.924318	0.0317033	1	WT - Control	limma	0.879976	0.881137	FALSE	no hit	5.87225
ATP5	P09457	ATP synthase subunit 5, mitochondrial OS=Saccharomyces cerevisiae (strain ATCC 204508 / S288c) GN=ATP5 PE=1 SV=1	1	1	3	3	2	6.02957	-0.0794713	21.8936	-0.146945	0.886873	0.886873	-7.26021	0.928691	0.0318485	1	WT - Control	limma	0.886873	0.886873	FALSE	no hit	6.02957
MRPL9	P31334	54S ribosomal protein L9, mitochondrial OS=Saccharomyces cerevisiae (strain ATCC 204508 / S288c) GN=MRPL9 PE=1 SV=3	1	1	3	3	3	6.09676	3.79292	21.3876	20.2124	4.63342e-08	5.59047e-06	9.32883	0.967968	1	1	MUT - Control	limma	4.63342e-08	5.59047e-06	TRUE	enriched hit	6.09676
CTA1	P15202	Peroxisomal catalase A OS=Saccharomyces cerevisiae (strain ATCC 204508 / S288c) GN=CTA1 PE=1 SV=1	1	1	3	3	4	6.61409	3.88732	22.8203	19.8016	5.43021e-08	5.59047e-06	9.18686	0.968619	1	1	MUT - Control	limma	5.43021e-08	5.59047e-06	TRUE	enriched hit	6.61409
HIS3	P06633	Imidazoleglycerol-phosphate dehydratase OS=Saccharomyces cerevisiae (strain ATCC 204508 / S288c) GN=HIS3 PE=1 SV=2	1	1	3	3	2	8.20604	6.33863	22.9219	19.7849	5.46562e-08	5.59047e-06	9.18102	0.968645	1	1	MUT - Control	limma	5.46562e-08	5.59047e-06	TRUE	enriched hit	8.20604
YRA1	Q12159	RNA annealing protein YRA1 OS=Saccharomyces cerevisiae (strain ATCC 204508 / S288c) GN=YRA1 PE=1 SV=2	1	1	3	3	9	7.93302	3.87754	24.6482	19.6672	5.72335e-08	5.59047e-06	9.13957	0.968832	1	1	MUT - Control	limma	5.72335e-08	5.59047e-06	TRUE	enriched hit	7.93302
MRPS5	P33759	37S ribosomal protein S5, mitochondrial OS=Saccharomyces cerevisiae (strain ATCC 204508 / S288c) GN=MRPS5 PE=1 SV=1	1	1	3	3	2	6.26726	4.2618	20.4268	19.6281	5.81212e-08	5.59047e-06	9.1257	0.968894	1	1	MUT - Control	limma	5.81212e-08	5.59047e-06	TRUE	enriched hit	6.26726
RPS2	P25443	40S ribosomal protein S2 OS=Saccharomyces cerevisiae (strain ATCC 204508 / S288c) GN=RPS2 PE=1 SV=3	1	1	3	3	5	7.47419	4.16389	23.9229	19.1553	7.01554e-08	5.59047e-06	8.95529	0.969643	1	1	MUT - Control	limma	7.01554e-08	5.59047e-06	TRUE	enriched hit	7.47419
KIN2	P13186	Serine/threonine-protein kinase KIN2 OS=Saccharomyces cerevisiae (strain ATCC 204508 / S288c) GN=KIN2 PE=1 SV=3	1	1	3	3	6	6.8015	4.77632	22.5112	19.0241	7.39762e-08	5.59047e-06	8.90698	0.969851	1	1	MUT - Control	limma	7.39762e-08	5.59047e-06	TRUE	enriched hit	6.8015
YHM2	Q04013	Citrate/oxoglutarate carrier protein OS=Saccharomyces cerevisiae (strain ATCC 204508 / S288c) GN=YHM2 PE=1 SV=1	1	1	3	3	2	6.48924	3.36944	21.5609	18.9853	7.51486e-08	5.59047e-06	8.89264	0.969912	1	1	MUT - Control	limma	7.51486e-08	5.59047e-06	TRUE	enriched hit	6.48924
RIM4	P38741	Meiotic activator RIM4 OS=Saccharomyces cerevisiae (strain ATCC 204508 / S288c) GN=RIM4 PE=1 SV=1	1	1	3	3	9	7.0502	3.65823	23.2545	18.8932	7.802e-08	5.59047e-06	8.85838	0.970058	1	1	MUT - Control	limma	7.802e-08	5.59047e-06	TRUE	enriched hit	7.0502
RED1	P14291	Protein RED1 OS=Saccharomyces cerevisiae (strain ATCC 204508 / S288c) GN=RED1 PE=1 SV=1	1	1	3	3	10	7.3981	4.29308	24.1203	18.8471	7.95054e-08	5.59047e-06	8.84113	0.970131	1	1	MUT - Control	limma	7.95054e-08	5.59047e-06	TRUE	enriched hit	7.3981
RPS18A|RPS18B	P0CX55|P0CX56	40S ribosomal protein S18-A OS=Saccharomyces cerevisiae (strain ATCC 204508 / S288c) GN=RPS18A PE=1 SV=1|40S ribosomal protein S18-B OS=Saccharomyces cerevisiae (strain ATCC 204508 / S288c) GN=RPS18B PE=1 SV=1	1	1	3	3	4	7.17463	4.13397	24.0191	18.6176	8.73783e-08	5.59047e-06	8.75453	0.970494	1	1	MUT - Control	limma	8.73783e-08	5.59047e-06	TRUE	enriched hit	7.17463
RSM23	Q01163	37S ribosomal protein S23, mitochondrial OS=Saccharomyces cerevisiae (strain ATCC 204508 / S288c) GN=RSM23 PE=1 SV=3	1	1	3	3	4	6.29498	3.69812	22.6366	18.5899	8.83869e-08	5.59047e-06	8.74398	0.970538	1	1	MUT - Control	limma	8.83869e-08	5.59047e-06	TRUE	enriched hit	6.29498
NSR1	P27476	Nuclear localization sequence-binding protein OS=Saccharomyces cerevisiae (strain ATCC 204508 / S288c) GN=NSR1 PE=1 SV=1	1	1	3	3	11	7.31068	4.25402	24.7843	18.3426	9.79923e-08	5.72124e-06	8.64888	0.97093	1	1	MUT - Control	limma	9.79923e-08	5.72124e-06	TRUE	enriched hit	7.31068
RPS1A	P33442	40S ribosomal protein S1-A OS=Saccharomyces cerevisiae (strain ATCC 204508 / S288c) GN=RPS1A PE=1 SV=2	1	1	3	3	2	7.07683	4.8057	22.0411	17.7581	1.25731e-07	6.81641e-06	8.41733	0.971856	1	1	MUT - Control	limma	1.25731e-07	6.81641e-06	TRUE	enriched hit	7.07683
RPL14A|RPL14B	P36105|P38754	60S ribosomal protein L14-A OS=Saccharomyces cerevisiae (strain ATCC 204508 / S288c) GN=RPL14A PE=1 SV=1|60S ribosomal protein L14-B OS=Saccharomyces cerevisiae (strain ATCC 204508 / S288c) GN=RPL14B PE=1 SV=1	1	1	3	3	7	8.14976	4.07473	25.43	17.4218	1.45639e-07	7.21989e-06	8.27962	0.972389	1	1	MUT - Control	limma	1.45639e-07	7.21989e-06	TRUE	enriched hit	8.14976
PIL1	P53252	Sphingolipid long chain base-responsive protein PIL1 OS=Saccharomyces cerevisiae (strain ATCC 204508 / S288c) GN=PIL1 PE=1 SV=1	1	1	3	3	4	6.64226	3.16827	22.5897	17.2267	1.58801e-07	7.21989e-06	8.19817	0.972698	1	1	MUT - Control	limma	1.58801e-07	7.21989e-06	TRUE	enriched hit	6.64226
NAM9	P27929	37S ribosomal protein NAM9, mitochondrial OS=Saccharomyces cerevisiae (strain ATCC 204508 / S288c) GN=NAM9 PE=1 SV=2	1	1	3	3	2	5.82461	4.06518	20.3315	16.9339	1.81141e-07	7.21989e-06	8.07373	0.973162	1	1	MUT - Control	limma	1.81141e-07	7.21989e-06	TRUE	enriched hit	5.82461
RPL11A|RPL11B	P0C0W9|Q3E757	60S ribosomal protein L11-A OS=Saccharomyces cerevisiae (strain ATCC 204508 / S288c) GN=RPL11A PE=1 SV=2|60S ribosomal protein L11-B OS=Saccharomyces cerevisiae (strain ATCC 204508 / S288c) GN=RPL11B PE=1 SV=3	1	1	3	3	5	7.36735	4.13932	23.2325	16.8968	1.84212e-07	7.21989e-06	8.05778	0.97322	1	1	MUT - Control	limma	1.84212e-07	7.21989e-06	TRUE	enriched hit	7.36735
BFR1	P38934	Nuclear segregation protein BFR1 OS=Saccharomyces cerevisiae (strain ATCC 204508 / S288c) GN=BFR1 PE=1 SV=1	1	1	3	3	22	7.13669	3.31392	25.4587	16.8962	1.84267e-07	7.21989e-06	8.0575	0.973221	1	1	MUT - Control	limma	1.84267e-07	7.21989e-06	TRUE	enriched hit	7.13669
SMC1	P32908	Structural maintenance of chromosomes protein 1 OS=Saccharomyces cerevisiae (strain ATCC 204508 / S288c) GN=SMC1 PE=1 SV=1	1	1	3	3	27	7.15628	3.006	26.1664	16.6688	2.04454e-07	7.21989e-06	7.95869	0.973582	1	1	MUT - Control	limma	2.04454e-07	7.21989e-06	TRUE	enriched hit	7.15628
WTM1	Q12363	Transcriptional modulator WTM1 OS=Saccharomyces cerevisiae (strain ATCC 204508 / S288c) GN=WTM1 PE=1 SV=1	1	1	3	3	2	6.21959	3.00157	21.4272	16.5549	2.1549e-07	7.21989e-06	7.90857	0.973762	1	1	MUT - Control	limma	2.1549e-07	7.21989e-06	TRUE	enriched hit	6.21959
ACH1	P32316	Acetyl-CoA hydrolase OS=Saccharomyces cerevisiae (strain ATCC 204508 / S288c) GN=ACH1 PE=1 SV=2	1	1	3	3	12	7.1744	3.38747	24.3212	16.5456	2.16412e-07	7.21989e-06	7.9045	0.973777	1	1	MUT - Control	limma	2.16412e-07	7.21989e-06	TRUE	enriched hit	7.1744
SRP1	Q02821	Importin subunit alpha OS=Saccharomyces cerevisiae (strain ATCC 204508 / S288c) GN=SRP1 PE=1 SV=1	1	1	3	3	8	7.13645	3.15531	23.4484	16.4216	2.29258e-07	7.21989e-06	7.84941	0.973973	1	1	MUT - Control	limma	2.29258e-07	7.21989e-06	TRUE	enriched hit	7.13645
REC8	Q12188	Meiotic recombination protein REC8 OS=Saccharomyces cerevisiae (strain ATCC 204508 / S288c) GN=REC8 PE=1 SV=1	1	1	3	3	8	6.52365	3.21217	23.2496	16.2737	2.45715e-07	7.21989e-06	7.78301	0.974208	1	1	MUT - Control	limma	2.45715e-07	7.21989e-06	TRUE	enriched hit	6.52365
MRPL35	Q06678	54S ribosomal protein L35, mitochondrial OS=Saccharomyces cerevisiae (strain ATCC 204508 / S288c) GN=MRPL35 PE=1 SV=1	1	1	3	3	5	6.08354	3.48136	22.2266	16.2389	2.49775e-07	7.21989e-06	7.76729	0.974263	1	1	MUT - Control	limma	2.49775e-07	7.21989e-06	TRUE	enriched hit	6.08354
HTS1	P07263|P07263-2	Histidine--tRNA ligase, mitochondrial OS=Saccharomyces cerevisiae (strain ATCC 204508 / S288c) GN=HTS1 PE=1 SV=2|Isoform Cytoplasmic of Histidine--tRNA ligase, mitochondrial OS=Saccharomyces cerevisiae (strain ATCC 204508 / S288c) GN=HTS1	1	1	3	3	6	6.56405	3.2535	23.2801	16.1699	2.58058e-07	7.21989e-06	7.73597	0.974372	1	1	MUT - Control	limma	2.58058e-07	7.21989e-06	TRUE	enriched hit	6.56405
CKA1	P15790	Casein kinase II subunit alpha OS=Saccharomyces cerevisiae (strain ATCC 204508 / S288c) GN=CKA1 PE=1 SV=1	1	1	3	3	8	6.59454	3.55009	23.1049	16.0575	2.72207e-07	7.21989e-06	7.68465	0.97455	1	1	MUT - Control	limma	2.72207e-07	7.21989e-06	TRUE	enriched hit	6.59454
TKL1	P23254	Transketolase 1 OS=Saccharomyces cerevisiae (strain ATCC 204508 / S288c) GN=TKL1 PE=1 SV=4	1	1	3	3	10	6.63938	3.12611	24.008	16.0409	2.74368e-07	7.21989e-06	7.67704	0.974576	1	1	MUT - Control	limma	2.74368e-07	7.21989e-06	TRUE	enriched hit	6.63938
MRP20	P32387	54S ribosomal protein L41, mitochondrial OS=Saccharomyces cerevisiae (strain ATCC 204508 / S288c) GN=MRP20 PE=1 SV=1	1	1	3	3	3	6.12357	3.21512	21.4772	15.9691	2.83956e-07	7.21989e-06	7.64395	0.97469	1	1	MUT - Control	limma	2.83956e-07	7.21989e-06	TRUE	enriched hit	6.12357
IMG1	P25626	54S ribosomal protein IMG1, mitochondrial OS=Saccharomyces cerevisiae (strain ATCC 204508 / S288c) GN=IMG1 PE=1 SV=1	1	1	3	3	2	5.60623	2.91818	20.7045	15.9516	2.8635e-07	7.21989e-06	7.63586	0.974718	1	1	MUT - Control	limma	2.8635e-07	7.21989e-06	TRUE	enriched hit	5.60623
YHR097C	P38809	Uncharacterized protein YHR097C OS=Saccharomyces cerevisiae (strain ATCC 204508 / S288c) GN=YHR097C PE=1 SV=1	1	1	3	3	3	5.85733	3.52629	21.5816	15.843	3.0171e-07	7.21989e-06	7.58543	0.97489	1	1	MUT - Control	limma	3.0171e-07	7.21989e-06	TRUE	enriched hit	5.85733
TEF4	P36008	Elongation factor 1-gamma 2 OS=Saccharomyces cerevisiae (strain ATCC 204508 / S288c) GN=TEF4 PE=1 SV=1	1	1	3	3	5	6.8212	2.89723	24.2676	15.7834	3.10532e-07	7.21989e-06	7.55757	0.974984	1	1	MUT - Control	limma	3.10532e-07	7.21989e-06	TRUE	enriched hit	6.8212
RPL30	P14120	60S ribosomal protein L30 OS=Saccharomyces cerevisiae (strain ATCC 204508 / S288c) GN=RPL30 PE=1 SV=3	1	1	3	3	3	6.28767	4.52961	24.3378	15.5269	3.51966e-07	7.21989e-06	7.43621	0.975391	1	1	MUT - Control	limma	3.51966e-07	7.21989e-06	TRUE	enriched hit	6.28767
RPS25B|RPS25A	P0C0T4|Q3E792	40S ribosomal protein S25-B OS=Saccharomyces cerevisiae (strain ATCC 204508 / S288c) GN=RPS25B PE=1 SV=1|40S ribosomal protein S25-A OS=Saccharomyces cerevisiae (strain ATCC 204508 / S288c) GN=RPS25A PE=1 SV=1	1	1	3	3	5	7.38782	3.30718	24.7516	15.5089	3.55102e-07	7.21989e-06	7.4276	0.975419	1	1	MUT - Control	limma	3.55102e-07	7.21989e-06	TRUE	enriched hit	7.38782
DPM1	P14020	Dolichol-phosphate mannosyltransferase OS=Saccharomyces cerevisiae (strain ATCC 204508 / S288c) GN=DPM1 PE=1 SV=3	1	1	3	3	2	6.37342	2.92076	21.9429	15.4033	3.7412e-07	7.21989e-06	7.37688	0.975587	1	1	MUT - Control	limma	3.7412e-07	7.21989e-06	TRUE	enriched hit	6.37342
SRO9	P25567	RNA-binding protein SRO9 OS=Saccharomyces cerevisiae (strain ATCC 204508 / S288c) GN=SRO9 PE=1 SV=2	1	1	3	3	5	6.1018	3.12537	21.859	15.3888	3.76816e-07	7.21989e-06	7.36989	0.97561	1	1	MUT - Control	limma	3.76816e-07	7.21989e-06	TRUE	enriched hit	6.1018
HSP82	P02829	ATP-dependent molecular chaperone HSP82 OS=Saccharomyces cerevisiae (strain ATCC 204508 / S288c) GN=HSP82 PE=1 SV=1	1	1	3	3	2	6.17547	3.04892	21.0437	15.3721	3.79955e-07	7.21989e-06	7.36182	0.975636	1	1	MUT - Control	limma	3.79955e-07	7.21989e-06	TRUE	enriched hit	6.17547
REP1	P03871	Partitioning protein REP1 OS=Saccharomyces cerevisiae (strain ATCC 204508 / S288c) GN=REP1 PE=1 SV=1	1	1	3	3	2	5.7277	3.07852	20.216	15.3641	3.81465e-07	7.21989e-06	7.35795	0.975649	1	1	MUT - Control	limma	3.81465e-07	7.21989e-06	TRUE	enriched hit	5.7277
HRK1	Q08732	Serine/threonine-protein kinase HRK1 OS=Saccharomyces cerevisiae (strain ATCC 204508 / S288c) GN=HRK1 PE=1 SV=1	1	1	3	3	3	5.94696	2.93545	21.5768	15.3449	3.85123e-07	7.21989e-06	7.34866	0.975679	1	1	MUT - Control	limma	3.85123e-07	7.21989e-06	TRUE	enriched hit	5.94696
MRPL17	P36528	54S ribosomal protein L17, mitochondrial OS=Saccharomyces cerevisiae (strain ATCC 204508 / S288c) GN=MRPL17 PE=1 SV=2	1	1	3	3	4	6.20612	3.03088	22.2661	15.3108	3.91722e-07	7.21989e-06	7.33211	0.975733	1	1	MUT - Control	limma	3.91722e-07	7.21989e-06	TRUE	enriched hit	6.20612
NAT1	P12945	N-terminal acetyltransferase A complex subunit NAT1 OS=Saccharomyces cerevisiae (strain ATCC 204508 / S288c) GN=NAT1 PE=1 SV=2	1	1	3	3	10	6.3812	2.76809	23.5684	15.2442	4.04989e-07	7.21989e-06	7.29963	0.975839	1	1	MUT - Control	limma	4.04989e-07	7.21989e-06	TRUE	enriched hit	6.3812
RPS16A|RPS16B	P0CX51|P0CX52	40S ribosomal protein S16-A OS=Saccharomyces cerevisiae (strain ATCC 204508 / S288c) GN=RPS16A PE=1 SV=1|40S ribosomal protein S16-B OS=Saccharomyces cerevisiae (strain ATCC 204508 / S288c) GN=RPS16B PE=1 SV=1	1	1	3	3	7	7.90044	2.84925	24.7404	15.1829	4.17631e-07	7.21989e-06	7.26963	0.975936	1	1	MUT - Control	limma	4.17631e-07	7.21989e-06	TRUE	enriched hit	7.90044
REC107	P21651	Recombination protein 107 OS=Saccharomyces cerevisiae (strain ATCC 204508 / S288c) GN=REC107 PE=1 SV=2	1	1	3	3	15	9.55705	3.08636	27.6004	15.0696	4.42172e-07	7.21989e-06	7.21382	0.976115	1	1	MUT - Control	limma	4.42172e-07	7.21989e-06	TRUE	enriched hit	9.55705
RSR1	P13856	Ras-related protein RSR1 OS=Saccharomyces cerevisiae (strain ATCC 204508 / S288c) GN=RSR1 PE=3 SV=1	1	1	3	3	2	5.57726	3.30117	20.8071	14.9953	4.59178e-07	7.21989e-06	7.17688	0.976233	1	1	MUT - Control	limma	4.59178e-07	7.21989e-06	TRUE	enriched hit	5.57726
RPS15	Q01855	40S ribosomal protein S15 OS=Saccharomyces cerevisiae (strain ATCC 204508 / S288c) GN=RPS15 PE=1 SV=1	1	1	3	3	3	6.7978	3.71653	23.461	14.9741	4.64151e-07	7.21989e-06	7.16633	0.976267	1	1	MUT - Control	limma	4.64151e-07	7.21989e-06	TRUE	enriched hit	6.7978
NSA1	P53136	Ribosome biogenesis protein NSA1 OS=Saccharomyces cerevisiae (strain ATCC 204508 / S288c) GN=NSA1 PE=1 SV=1	1	1	3	3	2	5.99642	3.50936	20.7077	14.9487	4.70188e-07	7.21989e-06	7.15366	0.976307	1	1	MUT - Control	limma	4.70188e-07	7.21989e-06	TRUE	enriched hit	5.99642
IRR1	P40541	Cohesin subunit SCC3 OS=Saccharomyces cerevisiae (strain ATCC 204508 / S288c) GN=IRR1 PE=1 SV=1	1	1	3	3	11	6.66578	3.38376	23.5092	14.93	4.74709e-07	7.21989e-06	7.14428	0.976337	1	1	MUT - Control	limma	4.74709e-07	7.21989e-06	TRUE	enriched hit	6.66578
BRX1	Q08235	Ribosome biogenesis protein BRX1 OS=Saccharomyces cerevisiae (strain ATCC 204508 / S288c) GN=BRX1 PE=1 SV=2	1	1	3	3	2	6.87335	3.08869	22.5376	14.8649	4.90774e-07	7.21989e-06	7.11163	0.97644	1	1	MUT - Control	limma	4.90774e-07	7.21989e-06	TRUE	enriched hit	6.87335
MRT4	P33201	Ribosome assembly factor MRT4 OS=Saccharomyces cerevisiae (strain ATCC 204508 / S288c) GN=MRT4 PE=1 SV=1	1	1	3	3	3	6.12173	2.66624	22.0894	14.8228	5.01485e-07	7.21989e-06	7.09043	0.976506	1	1	MUT - Control	limma	5.01485e-07	7.21989e-06	TRUE	enriched hit	6.12173
UGP1	P32861	UTP--glucose-1-phosphate uridylyltransferase OS=Saccharomyces cerevisiae (strain ATCC 204508 / S288c) GN=UGP1 PE=1 SV=1	1	1	3	3	6	6.79478	2.71913	23.9644	14.8113	5.04482e-07	7.21989e-06	7.08458	0.976525	1	1	MUT - Control	limma	5.04482e-07	7.21989e-06	TRUE	enriched hit	6.79478
MRPL22	P53881	54S ribosomal protein L22, mitochondrial OS=Saccharomyces cerevisiae (strain ATCC 204508 / S288c) GN=MRPL22 PE=1 SV=2	1	1	3	3	4	6.25294	3.44689	22.4649	14.8089	5.05083e-07	7.21989e-06	7.08341	0.976528	1	1	MUT - Control	limma	5.05083e-07	7.21989e-06	TRUE	enriched hit	6.25294
RPS11A|RPS11B	P0CX47|P0CX48	40S ribosomal protein S11-A OS=Saccharomyces cerevisiae (strain ATCC 204508 / S288c) GN=RPS11A PE=1 SV=1|40S ribosomal protein S11-B OS=Saccharomyces cerevisiae (strain ATCC 204508 / S288c) GN=RPS11B PE=1 SV=1	1	1	3	3	6	7.3704	3.43431	25.2036	14.7719	5.14813e-07	7.21989e-06	7.06466	0.976587	1	1	MUT - Control	limma	5.14813e-07	7.21989e-06	TRUE	enriched hit	7.3704
LPX1	Q12405	Peroxisomal membrane protein LPX1 OS=Saccharomyces cerevisiae (strain ATCC 204508 / S288c) GN=LPX1 PE=1 SV=1	1	1	3	3	3	5.89417	2.83481	21.8327	14.7573	5.18699e-07	7.21989e-06	7.05727	0.97661	1	1	MUT - Control	limma	5.18699e-07	7.21989e-06	TRUE	enriched hit	5.89417
LPD1	P09624	Dihydrolipoyl dehydrogenase, mitochondrial OS=Saccharomyces cerevisiae (strain ATCC 204508 / S288c) GN=LPD1 PE=1 SV=1	1	1	3	3	9	6.77582	2.74963	23.8931	14.7328	5.25308e-07	7.21989e-06	7.04482	0.976649	1	1	MUT - Control	limma	5.25308e-07	7.21989e-06	TRUE	enriched hit	6.77582
SMC3	P47037	Structural maintenance of chromosomes protein 3 OS=Saccharomyces cerevisiae (strain ATCC 204508 / S288c) GN=SMC3 PE=1 SV=1	1	1	3	3	30	7.29899	3.29772	26.263	14.7297	5.26147e-07	7.21989e-06	7.04325	0.976654	1	1	MUT - Control	limma	5.26147e-07	7.21989e-06	TRUE	enriched hit	7.29899
RFC2	P40348	Replication factor C subunit 2 OS=Saccharomyces cerevisiae (strain ATCC 204508 / S288c) GN=RFC2 PE=1 SV=1	1	1	3	3	2	5.92217	2.91231	21.1137	14.7058	5.32693e-07	7.21989e-06	7.03108	0.976692	1	1	MUT - Control	limma	5.32693e-07	7.21989e-06	TRUE	enriched hit	5.92217
ADE4	P04046	Amidophosphoribosyltransferase OS=Saccharomyces cerevisiae (strain ATCC 204508 / S288c) GN=ADE4 PE=1 SV=2	1	1	3	3	2	5.69251	2.7505	20.3567	14.6527	5.47573e-07	7.29137e-06	7.00396	0.976776	1	1	MUT - Control	limma	5.47573e-07	7.29137e-06	TRUE	enriched hit	5.69251
PRT1	P06103	Eukaryotic translation initiation factor 3 subunit B OS=Saccharomyces cerevisiae (strain ATCC 204508 / S288c) GN=PRT1 PE=1 SV=1	1	1	3	3	5	6.32802	2.75073	23.1656	14.5857	5.67021e-07	7.33506e-06	6.96957	0.976882	1	1	MUT - Control	limma	5.67021e-07	7.33506e-06	TRUE	enriched hit	6.32802
PMA1	P05030	Plasma membrane ATPase 1 OS=Saccharomyces cerevisiae (strain ATCC 204508 / S288c) GN=PMA1 PE=1 SV=2	1	1	3	3	12	7.53497	2.87688	24.6971	14.4875	5.96922e-07	7.33506e-06	6.91887	0.977038	1	1	MUT - Control	limma	5.96922e-07	7.33506e-06	TRUE	enriched hit	7.53497
RPP0	P05317	60S acidic ribosomal protein P0 OS=Saccharomyces cerevisiae (strain ATCC 204508 / S288c) GN=RPP0 PE=1 SV=2	1	1	3	3	11	7.98007	4.18881	25.9675	14.4822	5.98587e-07	7.33506e-06	6.91612	0.977046	1	1	MUT - Control	limma	5.98587e-07	7.33506e-06	TRUE	enriched hit	7.98007
HAS1	Q03532	ATP-dependent RNA helicase HAS1 OS=Saccharomyces cerevisiae (strain ATCC 204508 / S288c) GN=HAS1 PE=1 SV=1	1	1	3	3	7	6.09171	2.63396	22.9389	14.4663	6.03629e-07	7.33506e-06	6.90784	0.977071	1	1	MUT - Control	limma	6.03629e-07	7.33506e-06	TRUE	enriched hit	6.09171
TFC6	Q06339	Transcription factor tau 91 kDa subunit OS=Saccharomyces cerevisiae (strain ATCC 204508 / S288c) GN=TFC6 PE=1 SV=1	1	1	3	3	3	6.17854	3.85933	21.8451	14.466	6.03725e-07	7.33506e-06	6.90768	0.977072	1	1	MUT - Control	limma	6.03725e-07	7.33506e-06	TRUE	enriched hit	6.17854
SUI3	P09064	Eukaryotic translation initiation factor 2 subunit beta OS=Saccharomyces cerevisiae (strain ATCC 204508 / S288c) GN=SUI3 PE=1 SV=2	1	1	3	3	3	5.93457	4.2246	21.2531	14.4422	6.11304e-07	7.33506e-06	6.89536	0.97711	1	1	MUT - Control	limma	6.11304e-07	7.33506e-06	TRUE	enriched hit	5.93457
RPL1A|RPL1B	P0CX43|P0CX44	60S ribosomal protein L1-A OS=Saccharomyces cerevisiae (strain ATCC 204508 / S288c) GN=RPL1A PE=1 SV=1|60S ribosomal protein L1-B OS=Saccharomyces cerevisiae (strain ATCC 204508 / S288c) GN=RPL1B PE=1 SV=1	1	1	3	3	4	7.67413	4.94063	24.1606	14.4074	6.22648e-07	7.33506e-06	6.87719	0.977165	1	1	MUT - Control	limma	6.22648e-07	7.33506e-06	TRUE	enriched hit	7.67413
CIC1	P38779	Proteasome-interacting protein CIC1 OS=Saccharomyces cerevisiae (strain ATCC 204508 / S288c) GN=CIC1 PE=1 SV=1	1	1	3	3	6	6.59766	3.28625	23.0952	14.3887	6.28823e-07	7.33506e-06	6.86743	0.977194	1	1	MUT - Control	limma	6.28823e-07	7.33506e-06	TRUE	enriched hit	6.59766
YEF3	P16521	Elongation factor 3A OS=Saccharomyces cerevisiae (strain ATCC 204508 / S288c) GN=YEF3 PE=1 SV=4	1	1	3	3	5	6.67971	2.7012	22.5735	14.3355	6.46794e-07	7.33506e-06	6.83955	0.977279	1	1	MUT - Control	limma	6.46794e-07	7.33506e-06	TRUE	enriched hit	6.67971
SUP35	P05453	Eukaryotic peptide chain release factor GTP-binding subunit OS=Saccharomyces cerevisiae (strain ATCC 204508 / S288c) GN=SUP35 PE=1 SV=1	1	1	3	3	5	6.44108	3.13434	23.001	14.3334	6.47496e-07	7.33506e-06	6.83848	0.977282	1	1	MUT - Control	limma	6.47496e-07	7.33506e-06	TRUE	enriched hit	6.44108
ACS1	Q01574	Acetyl-coenzyme A synthetase 1 OS=Saccharomyces cerevisiae (strain ATCC 204508 / S288c) GN=ACS1 PE=1 SV=2	1	1	3	3	12	7.25762	2.683	25.2769	14.2397	6.80602e-07	7.3561e-06	6.78909	0.97743	1	1	MUT - Control	limma	6.80602e-07	7.3561e-06	TRUE	enriched hit	7.25762
AMD1	P15274	AMP deaminase OS=Saccharomyces cerevisiae (strain ATCC 204508 / S288c) GN=AMD1 PE=1 SV=2	1	1	3	3	9	6.12388	3.12	23.4961	14.2335	6.8287e-07	7.3561e-06	6.78579	0.97744	1	1	MUT - Control	limma	6.8287e-07	7.3561e-06	TRUE	enriched hit	6.12388
ACO1	P19414	Aconitate hydratase, mitochondrial OS=Saccharomyces cerevisiae (strain ATCC 204508 / S288c) GN=ACO1 PE=1 SV=2	1	1	3	3	10	6.89283	3.02538	24.8426	14.2278	6.84928e-07	7.3561e-06	6.78281	0.977449	1	1	MUT - Control	limma	6.84928e-07	7.3561e-06	TRUE	enriched hit	6.89283
MND1	P53102	Meiotic nuclear division protein 1 OS=Saccharomyces cerevisiae (strain ATCC 204508 / S288c) GN=MND1 PE=1 SV=2	1	1	3	3	2	6.10696	3.05884	22.2875	14.2191	6.8812e-07	7.3561e-06	6.7782	0.977463	1	1	MUT - Control	limma	6.8812e-07	7.3561e-06	TRUE	enriched hit	6.10696
RSM24	Q03976	37S ribosomal protein S24, mitochondrial OS=Saccharomyces cerevisiae (strain ATCC 204508 / S288c) GN=RSM24 PE=1 SV=1	1	1	3	3	2	5.88403	4.41954	21.1467	14.1787	7.03151e-07	7.37973e-06	6.75677	0.977527	1	1	MUT - Control	limma	7.03151e-07	7.37973e-06	TRUE	enriched hit	5.88403
PSH1	Q12161	RING finger protein PSH1 OS=Saccharomyces cerevisiae (strain ATCC 204508 / S288c) GN=PSH1 PE=1 SV=1	1	1	3	3	3	5.95004	2.8141	21.6663	14.1613	7.09776e-07	7.37973e-06	6.74747	0.977555	1	1	MUT - Control	limma	7.09776e-07	7.37973e-06	TRUE	enriched hit	5.95004
ARP4	P80428	Actin-related protein 4 OS=Saccharomyces cerevisiae (strain ATCC 204508 / S288c) GN=ARP4 PE=1 SV=1	1	1	3	3	4	6.10595	2.77345	22.1126	14.067	7.46711e-07	7.65883e-06	6.69709	0.977704	1	1	MUT - Control	limma	7.46711e-07	7.65883e-06	TRUE	enriched hit	6.10595
NUS1	Q12063	Dehydrodolichyl diphosphate synthase complex subunit NUS1 OS=Saccharomyces cerevisiae (strain ATCC 204508 / S288c) GN=NUS1 PE=1 SV=1	1	1	3	3	3	5.81798	2.54391	21.1862	14.0011	7.7381e-07	7.74771e-06	6.66165	0.977809	1	1	MUT - Control	limma	7.7381e-07	7.74771e-06	TRUE	enriched hit	5.81798
ATP1	P07251	ATP synthase subunit alpha, mitochondrial OS=Saccharomyces cerevisiae (strain ATCC 204508 / S288c) GN=ATP1 PE=1 SV=5	1	1	3	3	16	7.31594	2.73102	24.7881	13.987	7.79734e-07	7.74771e-06	6.65406	0.977831	1	1	MUT - Control	limma	7.79734e-07	7.74771e-06	TRUE	enriched hit	7.31594
SSZ1	P38788	Ribosome-associated complex subunit SSZ1 OS=Saccharomyces cerevisiae (strain ATCC 204508 / S288c) GN=SSZ1 PE=1 SV=2	1	1	3	3	5	6.25138	2.511	22.6835	13.9723	7.86e-07	7.74771e-06	6.6461	0.977854	1	1	MUT - Control	limma	7.86e-07	7.74771e-06	TRUE	enriched hit	6.25138
HFD1	Q04458	Fatty aldehyde dehydrogenase HFD1 OS=Saccharomyces cerevisiae (strain ATCC 204508 / S288c) GN=HFD1 PE=1 SV=1	1	1	3	3	3	6.23617	2.98461	21.726	13.9322	8.0332e-07	7.79223e-06	6.6244	0.977918	1	1	MUT - Control	limma	8.0332e-07	7.79223e-06	TRUE	enriched hit	6.23617
RPS7A	P26786	40S ribosomal protein S7-A OS=Saccharomyces cerevisiae (strain ATCC 204508 / S288c) GN=RPS7A PE=1 SV=4	1	1	3	3	3	6.15425	3.6994	23.5431	13.9146	8.11049e-07	7.79223e-06	6.61486	0.977946	1	1	MUT - Control	limma	8.11049e-07	7.79223e-06	TRUE	enriched hit	6.15425
KAP95	Q06142	Importin subunit beta-1 OS=Saccharomyces cerevisiae (strain ATCC 204508 / S288c) GN=KAP95 PE=1 SV=1	1	1	3	3	4	6.38918	3.41703	22.7561	13.8562	8.37364e-07	7.94449e-06	6.58304	0.978038	1	1	MUT - Control	limma	8.37364e-07	7.94449e-06	TRUE	enriched hit	6.38918
RPS24A|RPS24B	P0CX31|P0CX32	40S ribosomal protein S24-A OS=Saccharomyces cerevisiae (strain ATCC 204508 / S288c) GN=RPS24A PE=1 SV=1|40S ribosomal protein S24-B OS=Saccharomyces cerevisiae (strain ATCC 204508 / S288c) GN=RPS24B PE=1 SV=1	1	1	3	3	6	7.29494	4.94578	24.3578	13.7552	8.85105e-07	8.19673e-06	6.52773	0.978198	1	1	MUT - Control	limma	8.85105e-07	8.19673e-06	TRUE	enriched hit	7.29494
XDJ1	P39102	DnaJ protein homolog XDJ1 OS=Saccharomyces cerevisiae (strain ATCC 204508 / S288c) GN=XDJ1 PE=1 SV=2	1	1	3	3	5	6.11724	2.83743	23.2077	13.7524	8.86473e-07	8.19673e-06	6.52618	0.978203	1	1	MUT - Control	limma	8.86473e-07	8.19673e-06	TRUE	enriched hit	6.11724
RSM18	P40033	37S ribosomal protein RSM18, mitochondrial OS=Saccharomyces cerevisiae (strain ATCC 204508 / S288c) GN=RSM18 PE=1 SV=2	1	1	3	3	2	5.84983	2.63159	21.394	13.7205	9.02226e-07	8.19673e-06	6.50859	0.978253	1	1	MUT - Control	limma	9.02226e-07	8.19673e-06	TRUE	enriched hit	5.84983
DED81	P38707	Asparagine--tRNA ligase, cytoplasmic OS=Saccharomyces cerevisiae (strain ATCC 204508 / S288c) GN=DED81 PE=1 SV=1	1	1	3	3	7	6.39461	2.44676	22.516	13.692	9.16568e-07	8.19673e-06	6.49284	0.978298	1	1	MUT - Control	limma	9.16568e-07	8.19673e-06	TRUE	enriched hit	6.39461
YGR130C	P53278	Uncharacterized protein YGR130C OS=Saccharomyces cerevisiae (strain ATCC 204508 / S288c) GN=YGR130C PE=1 SV=1	1	1	3	3	2	6.21994	3.56011	22.1814	13.6893	9.17947e-07	8.19673e-06	6.49133	0.978303	1	1	MUT - Control	limma	9.17947e-07	8.19673e-06	TRUE	enriched hit	6.21994
NOG1	Q02892	Nucleolar GTP-binding protein 1 OS=Saccharomyces cerevisiae (strain ATCC 204508 / S288c) GN=NOG1 PE=1 SV=1	1	1	3	3	5	6.41551	2.86614	23.3348	13.6373	9.44779e-07	8.24396e-06	6.46253	0.978385	1	1	MUT - Control	limma	9.44779e-07	8.24396e-06	TRUE	enriched hit	6.41551
FRS1	P15624	Phenylalanine--tRNA ligase beta subunit OS=Saccharomyces cerevisiae (strain ATCC 204508 / S288c) GN=FRS1 PE=1 SV=3	1	1	3	3	4	5.91774	2.3786	21.9522	13.5801	9.75365e-07	8.24396e-06	6.43065	0.978476	1	1	MUT - Control	limma	9.75365e-07	8.24396e-06	TRUE	enriched hit	5.91774
KGD2	P19262	Dihydrolipoyllysine-residue succinyltransferase component of 2-oxoglutarate dehydrogenase complex, mitochondrial OS=Saccharomyces cerevisiae (strain ATCC 204508 / S288c) GN=KGD2 PE=1 SV=2	1	1	3	3	4	6.68602	3.02718	22.5216	13.5791	9.75892e-07	8.24396e-06	6.43011	0.978477	1	1	MUT - Control	limma	9.75892e-07	8.24396e-06	TRUE	enriched hit	6.68602
RPL25	P04456	60S ribosomal protein L25 OS=Saccharomyces cerevisiae (strain ATCC 204508 / S288c) GN=RPL25 PE=1 SV=4	1	1	3	3	7	7.89285	2.91568	24.5449	13.5399	9.97482e-07	8.24396e-06	6.4082	0.978539	1	1	MUT - Control	limma	9.97482e-07	8.24396e-06	TRUE	enriched hit	7.89285
RNP1	P32385	Ribonucleoprotein 1 OS=Saccharomyces cerevisiae (strain ATCC 204508 / S288c) GN=RNP1 PE=3 SV=2	1	1	3	3	8	7.00532	4.0565	23.4876	13.5376	9.98816e-07	8.24396e-06	6.40686	0.978543	1	1	MUT - Control	limma	9.98816e-07	8.24396e-06	TRUE	enriched hit	7.00532
MDH2	P22133	Malate dehydrogenase, cytoplasmic OS=Saccharomyces cerevisiae (strain ATCC 204508 / S288c) GN=MDH2 PE=1 SV=2	1	1	3	3	3	6.3563	3.17307	22.4516	13.5297	1.00322e-06	8.24396e-06	6.40245	0.978556	1	1	MUT - Control	limma	1.00322e-06	8.24396e-06	TRUE	enriched hit	6.3563
RPS8A|RPS8B	P0CX39|P0CX40	40S ribosomal protein S8-A OS=Saccharomyces cerevisiae (strain ATCC 204508 / S288c) GN=RPS8A PE=1 SV=1|40S ribosomal protein S8-B OS=Saccharomyces cerevisiae (strain ATCC 204508 / S288c) GN=RPS8B PE=1 SV=1	1	1	3	3	8	7.55414	4.77685	25.6971	13.5238	1.00655e-06	8.24396e-06	6.39914	0.978565	1	1	MUT - Control	limma	1.00655e-06	8.24396e-06	TRUE	enriched hit	7.55414
HRR25	P29295	Casein kinase I homolog HRR25 OS=Saccharomyces cerevisiae (strain ATCC 204508 / S288c) GN=HRR25 PE=1 SV=1	1	1	3	3	4	6.54618	2.86425	23.2326	13.5174	1.01013e-06	8.24396e-06	6.39558	0.978575	1	1	MUT - Control	limma	1.01013e-06	8.24396e-06	TRUE	enriched hit	6.54618
RPL35A|RPL35B	P0CX84|P0CX85	60S ribosomal protein L35-A OS=Saccharomyces cerevisiae (strain ATCC 204508 / S288c) GN=RPL35A PE=1 SV=1|60S ribosomal protein L35-B OS=Saccharomyces cerevisiae (strain ATCC 204508 / S288c) GN=RPL35B PE=1 SV=1	1	1	3	3	4	7.89808	2.91407	24.7528	13.4838	1.02934e-06	8.31135e-06	6.3767	0.978628	1	1	MUT - Control	limma	1.02934e-06	8.31135e-06	TRUE	enriched hit	7.89808
DLD1	P32891	D-lactate dehydrogenase [cytochrome] 1, mitochondrial OS=Saccharomyces cerevisiae (strain ATCC 204508 / S288c) GN=DLD1 PE=1 SV=2	1	1	3	3	4	6.24852	2.63753	22.352	13.444	1.05268e-06	8.41038e-06	6.35421	0.978691	1	1	MUT - Control	limma	1.05268e-06	8.41038e-06	TRUE	enriched hit	6.24852
ARO4	P32449	Phospho-2-dehydro-3-deoxyheptonate aldolase, tyrosine-inhibited OS=Saccharomyces cerevisiae (strain ATCC 204508 / S288c) GN=ARO4 PE=1 SV=2	1	1	3	3	2	5.99598	2.54253	21.9355	13.3833	1.08933e-06	8.41288e-06	6.31988	0.978788	1	1	MUT - Control	limma	1.08933e-06	8.41288e-06	TRUE	enriched hit	5.99598
ALD4	P46367	Potassium-activated aldehyde dehydrogenase, mitochondrial OS=Saccharomyces cerevisiae (strain ATCC 204508 / S288c) GN=ALD4 PE=1 SV=2	1	1	3	3	8	7.36024	3.19008	24.2295	13.3823	1.08993e-06	8.41288e-06	6.31932	0.978789	1	1	MUT - Control	limma	1.08993e-06	8.41288e-06	TRUE	enriched hit	7.36024
MRPS17	Q03246	37S ribosomal protein S17, mitochondrial OS=Saccharomyces cerevisiae (strain ATCC 204508 / S288c) GN=MRPS17 PE=1 SV=1	1	1	3	3	3	6.04828	2.40261	21.8947	13.3741	1.09501e-06	8.41288e-06	6.31466	0.978802	1	1	MUT - Control	limma	1.09501e-06	8.41288e-06	TRUE	enriched hit	6.04828
RPS13	P05756	40S ribosomal protein S13 OS=Saccharomyces cerevisiae (strain ATCC 204508 / S288c) GN=RPS13 PE=1 SV=3	1	1	3	3	4	6.93012	3.2547	22.5619	13.3704	1.09733e-06	8.41288e-06	6.31253	0.978808	1	1	MUT - Control	limma	1.09733e-06	8.41288e-06	TRUE	enriched hit	6.93012
TES1	P41903	Peroxisomal acyl-coenzyme A thioester hydrolase 1 OS=Saccharomyces cerevisiae (strain ATCC 204508 / S288c) GN=TES1 PE=1 SV=1	1	1	3	3	4	6.27508	3.08688	22.4907	13.3021	1.14063e-06	8.63931e-06	6.27366	0.978916	1	1	MUT - Control	limma	1.14063e-06	8.63931e-06	TRUE	enriched hit	6.27508
SWC4	P53201	SWR1-complex protein 4 OS=Saccharomyces cerevisiae (strain ATCC 204508 / S288c) GN=SWC4 PE=1 SV=1	1	1	3	3	2	5.83951	3.52891	20.0969	13.2882	1.14968e-06	8.63931e-06	6.26571	0.978938	1	1	MUT - Control	limma	1.14968e-06	8.63931e-06	TRUE	enriched hit	5.83951
MLS1	P30952	Malate synthase 1, glyoxysomal OS=Saccharomyces cerevisiae (strain ATCC 204508 / S288c) GN=MLS1 PE=1 SV=1	1	1	3	3	9	7.18432	2.37312	25.4652	13.2405	1.1814e-06	8.63931e-06	6.23834	0.979014	1	1	MUT - Control	limma	1.1814e-06	8.63931e-06	TRUE	enriched hit	7.18432
DED1	P06634	ATP-dependent RNA helicase DED1 OS=Saccharomyces cerevisiae (strain ATCC 204508 / S288c) GN=DED1 PE=1 SV=2	1	1	3	3	7	6.66594	3.36521	23.7082	13.2236	1.19286e-06	8.63931e-06	6.22863	0.979041	1	1	MUT - Control	limma	1.19286e-06	8.63931e-06	TRUE	enriched hit	6.66594
ASC1	P38011	Guanine nucleotide-binding protein subunit beta-like protein OS=Saccharomyces cerevisiae (strain ATCC 204508 / S288c) GN=ASC1 PE=1 SV=4	1	1	3	3	3	6.77331	2.65743	22.5647	13.2108	1.20158e-06	8.63931e-06	6.22131	0.979061	1	1	MUT - Control	limma	1.20158e-06	8.63931e-06	TRUE	enriched hit	6.77331
POL30	P15873	Proliferating cell nuclear antigen OS=Saccharomyces cerevisiae (strain ATCC 204508 / S288c) GN=POL30 PE=1 SV=1	1	1	3	3	2	5.82849	2.88608	20.8947	13.2029	1.20702e-06	8.63931e-06	6.21675	0.979073	1	1	MUT - Control	limma	1.20702e-06	8.63931e-06	TRUE	enriched hit	5.82849
HOP1	P20050	Meiosis-specific protein HOP1 OS=Saccharomyces cerevisiae (strain ATCC 204508 / S288c) GN=HOP1 PE=1 SV=2	1	1	3	3	12	8.04328	3.97446	25.7927	13.1776	1.2247e-06	8.63931e-06	6.20212	0.979114	1	1	MUT - Control	limma	1.2247e-06	8.63931e-06	TRUE	enriched hit	8.04328
RSC8	P43609	Chromatin structure-remodeling complex protein RSC8 OS=Saccharomyces cerevisiae (strain ATCC 204508 / S288c) GN=RSC8 PE=1 SV=1	1	1	3	3	4	5.74777	2.79963	21.5312	13.1755	1.22613e-06	8.63931e-06	6.20095	0.979117	1	1	MUT - Control	limma	1.22613e-06	8.63931e-06	TRUE	enriched hit	5.74777
MIR1	P23641	Mitochondrial phosphate carrier protein OS=Saccharomyces cerevisiae (strain ATCC 204508 / S288c) GN=MIR1 PE=1 SV=1	1	1	3	3	4	6.19067	3.39561	22.4525	13.171	1.22931e-06	8.63931e-06	6.19834	0.979124	1	1	MUT - Control	limma	1.22931e-06	8.63931e-06	TRUE	enriched hit	6.19067
SSE1	P32589	Heat shock protein homolog SSE1 OS=Saccharomyces cerevisiae (strain ATCC 204508 / S288c) GN=SSE1 PE=1 SV=4	1	1	3	3	8	6.51848	2.5261	24.19	13.1106	1.27275e-06	8.83746e-06	6.16335	0.97922	1	1	MUT - Control	limma	1.27275e-06	8.83746e-06	TRUE	enriched hit	6.51848
PFK1	P16861	ATP-dependent 6-phosphofructokinase subunit alpha OS=Saccharomyces cerevisiae (strain ATCC 204508 / S288c) GN=PFK1 PE=1 SV=1	1	1	3	3	5	6.39142	2.76773	22.8923	13.0997	1.28079e-06	8.83746e-06	6.15701	0.979237	1	1	MUT - Control	limma	1.28079e-06	8.83746e-06	TRUE	enriched hit	6.39142
SRP72	P38688	Signal recognition particle subunit SRP72 OS=Saccharomyces cerevisiae (strain ATCC 204508 / S288c) GN=SRP72 PE=1 SV=2	1	1	3	3	2	6.0783	2.981	20.8587	13.0318	1.33202e-06	8.9677e-06	6.11745	0.979344	1	1	MUT - Control	limma	1.33202e-06	8.9677e-06	TRUE	enriched hit	6.0783
LEU4	P06208|P06208-2	2-isopropylmalate synthase OS=Saccharomyces cerevisiae (strain ATCC 204508 / S288c) GN=LEU4 PE=1 SV=1|Isoform Cytoplasmic of 2-isopropylmalate synthase OS=Saccharomyces cerevisiae (strain ATCC 204508 / S288c) GN=LEU4	1	1	3	3	3	5.85207	2.89446	22.063	13.001	1.35607e-06	8.9677e-06	6.0994	0.979393	1	1	MUT - Control	limma	1.35607e-06	8.9677e-06	TRUE	enriched hit	5.85207
PDS5	Q04264	Sister chromatid cohesion protein PDS5 OS=Saccharomyces cerevisiae (strain ATCC 204508 / S288c) GN=PDS5 PE=1 SV=1	1	1	3	3	9	6.26803	2.58723	23.3829	13.0001	1.3568e-06	8.9677e-06	6.09886	0.979395	1	1	MUT - Control	limma	1.3568e-06	8.9677e-06	TRUE	enriched hit	6.26803
THS1	P04801	Threonine--tRNA ligase, cytoplasmic OS=Saccharomyces cerevisiae (strain ATCC 204508 / S288c) GN=THS1 PE=1 SV=2	1	1	3	3	14	7.17417	3.96309	24.3992	12.9963	1.35979e-06	8.9677e-06	6.09664	0.979401	1	1	MUT - Control	limma	1.35979e-06	8.9677e-06	TRUE	enriched hit	7.17417
IPP1	P00817	Inorganic pyrophosphatase OS=Saccharomyces cerevisiae (strain ATCC 204508 / S288c) GN=IPP1 PE=1 SV=4	1	1	3	3	2	5.92746	2.42768	21.061	12.9861	1.36785e-06	8.9677e-06	6.09067	0.979417	1	1	MUT - Control	limma	1.36785e-06	8.9677e-06	TRUE	enriched hit	5.92746
HSC82	P15108	ATP-dependent molecular chaperone HSC82 OS=Saccharomyces cerevisiae (strain ATCC 204508 / S288c) GN=HSC82 PE=1 SV=4	1	1	3	3	3	6.67248	2.52186	23.4554	12.9827	1.37056e-06	8.9677e-06	6.08867	0.979422	1	1	MUT - Control	limma	1.37056e-06	8.9677e-06	TRUE	enriched hit	6.67248
MGM101	P32787	Mitochondrial genome maintenance protein MGM101 OS=Saccharomyces cerevisiae (strain ATCC 204508 / S288c) GN=MGM101 PE=1 SV=1	1	1	3	3	4	6.87243	2.88879	22.9541	12.954	1.39361e-06	9.04057e-06	6.07183	0.979468	1	1	MUT - Control	limma	1.39361e-06	9.04057e-06	TRUE	enriched hit	6.87243
RPC82	P32349	DNA-directed RNA polymerase III subunit RPC3 OS=Saccharomyces cerevisiae (strain ATCC 204508 / S288c) GN=RPC82 PE=1 SV=2	1	1	3	3	2	5.62875	2.57776	20.1692	12.8971	4.60803e-06	1.47574e-05	5.00403	0.979558	1	1	MUT - Control	limma	4.60803e-06	1.47574e-05	TRUE	enriched hit	5.62875
SPP1	Q03012	COMPASS component SPP1 OS=Saccharomyces cerevisiae (strain ATCC 204508 / S288c) GN=SPP1 PE=1 SV=1	1	1	3	3	10	8.33915	3.23704	26.2962	12.8861	1.45001e-06	9.17826e-06	6.03174	0.979575	1	1	MUT - Control	limma	1.45001e-06	9.17826e-06	TRUE	enriched hit	8.33915
SSB1|SSB2	P11484|P40150	Heat shock protein SSB1 OS=Saccharomyces cerevisiae (strain ATCC 204508 / S288c) GN=SSB1 PE=1 SV=3|Heat shock protein SSB2 OS=Saccharomyces cerevisiae (strain ATCC 204508 / S288c) GN=SSB2 PE=1 SV=2	1	1	3	3	13	7.6812	2.50984	24.7825	12.8748	1.45965e-06	9.17826e-06	6.02504	0.979593	1	1	MUT - Control	limma	1.45965e-06	9.17826e-06	TRUE	enriched hit	7.6812
GET4	Q12125	Golgi to ER traffic protein 4 OS=Saccharomyces cerevisiae (strain ATCC 204508 / S288c) GN=GET4 PE=1 SV=1	1	1	3	3	4	6.66268	3.1974	23.0721	12.8694	1.46428e-06	9.17826e-06	6.02184	0.979602	1	1	MUT - Control	limma	1.46428e-06	9.17826e-06	TRUE	enriched hit	6.66268
TMA19	P35691	Translationally-controlled tumor protein homolog OS=Saccharomyces cerevisiae (strain ATCC 204508 / S288c) GN=TMA19 PE=1 SV=1	1	1	3	3	2	5.73017	2.54207	20.6237	12.8622	1.4705e-06	9.17826e-06	6.01755	0.979613	1	1	MUT - Control	limma	1.4705e-06	9.17826e-06	TRUE	enriched hit	5.73017
NOP2	P40991	25S rRNA (cytosine(2870)-C(5))-methyltransferase OS=Saccharomyces cerevisiae (strain ATCC 204508 / S288c) GN=NOP2 PE=1 SV=1	1	1	3	3	2	6.46084	2.89919	21.136	12.8566	1.47529e-06	9.17826e-06	6.01426	0.979622	1	1	MUT - Control	limma	1.47529e-06	9.17826e-06	TRUE	enriched hit	6.46084
RPL20A|RPL20B	P0CX23|P0CX24	60S ribosomal protein L20-A OS=Saccharomyces cerevisiae (strain ATCC 204508 / S288c) GN=RPL20A PE=1 SV=1|60S ribosomal protein L20-B OS=Saccharomyces cerevisiae (strain ATCC 204508 / S288c) GN=RPL20B PE=1 SV=1	1	1	3	3	7	7.16083	2.97438	24.4892	12.8156	1.5113e-06	9.31888e-06	5.98987	0.979687	1	1	MUT - Control	limma	1.5113e-06	9.31888e-06	TRUE	enriched hit	7.16083
ETR1	P38071	Enoyl-[acyl-carrier protein] reductase [NADPH, B-specific], mitochondrial OS=Saccharomyces cerevisiae (strain ATCC 204508 / S288c) GN=ETR1 PE=1 SV=3	1	1	3	3	2	5.92873	2.52121	21.4743	12.7922	1.53221e-06	9.31888e-06	5.97596	0.979724	1	1	MUT - Control	limma	1.53221e-06	9.31888e-06	TRUE	enriched hit	5.92873
SUI2	P20459	Eukaryotic translation initiation factor 2 subunit alpha OS=Saccharomyces cerevisiae (strain ATCC 204508 / S288c) GN=SUI2 PE=1 SV=1	1	1	3	3	2	5.89293	3.17657	20.679	12.7819	1.54161e-06	9.31888e-06	5.96977	0.979741	1	1	MUT - Control	limma	1.54161e-06	9.31888e-06	TRUE	enriched hit	5.89293
NOP13	P53883	Nucleolar protein 13 OS=Saccharomyces cerevisiae (strain ATCC 204508 / S288c) GN=NOP13 PE=1 SV=2	1	1	3	3	2	5.45305	2.39308	20.3545	12.7759	1.54701e-06	9.31888e-06	5.96623	0.97975	1	1	MUT - Control	limma	1.54701e-06	9.31888e-06	TRUE	enriched hit	5.45305
STM1	P39015	Suppressor protein STM1 OS=Saccharomyces cerevisiae (strain ATCC 204508 / S288c) GN=STM1 PE=1 SV=3	1	1	3	3	9	8.05368	3.48126	25.2506	12.7488	1.57197e-06	9.32563e-06	5.95002	0.979793	1	1	MUT - Control	limma	1.57197e-06	9.32563e-06	TRUE	enriched hit	8.05368
ADE2	P21264	Phosphoribosylaminoimidazole carboxylase OS=Saccharomyces cerevisiae (strain ATCC 204508 / S288c) GN=ADE2 PE=1 SV=1	1	1	3	3	2	6.1007	2.81738	21.6908	12.7338	1.58599e-06	9.32563e-06	5.94102	0.979817	1	1	MUT - Control	limma	1.58599e-06	9.32563e-06	TRUE	enriched hit	6.1007
GCD11	P32481	Eukaryotic translation initiation factor 2 subunit gamma OS=Saccharomyces cerevisiae (strain ATCC 204508 / S288c) GN=GCD11 PE=1 SV=1	1	1	3	3	3	6.06804	3.03855	21.7652	12.712	1.60665e-06	9.32563e-06	5.92791	0.979851	1	1	MUT - Control	limma	1.60665e-06	9.32563e-06	TRUE	enriched hit	6.06804
PET9	P18239	ADP,ATP carrier protein 2 OS=Saccharomyces cerevisiae (strain ATCC 204508 / S288c) GN=PET9 PE=1 SV=2	1	1	3	3	3	7.19958	2.94078	22.8998	12.6861	1.63152e-06	9.32563e-06	5.91234	0.979892	1	1	MUT - Control	limma	1.63152e-06	9.32563e-06	TRUE	enriched hit	7.19958
ZUO1	P32527	Zuotin OS=Saccharomyces cerevisiae (strain ATCC 204508 / S288c) GN=ZUO1 PE=1 SV=1	1	1	3	3	6	6.72192	2.34237	22.8834	12.6842	1.63334e-06	9.32563e-06	5.91121	0.979895	1	1	MUT - Control	limma	1.63334e-06	9.32563e-06	TRUE	enriched hit	6.72192
CCT8	P47079	T-complex protein 1 subunit theta OS=Saccharomyces cerevisiae (strain ATCC 204508 / S288c) GN=CCT8 PE=1 SV=1	1	1	3	3	2	5.94489	2.66977	21.3885	12.6833	1.63423e-06	9.32563e-06	5.91066	0.979897	1	1	MUT - Control	limma	1.63423e-06	9.32563e-06	TRUE	enriched hit	5.94489
RPS20	P38701	40S ribosomal protein S20 OS=Saccharomyces cerevisiae (strain ATCC 204508 / S288c) GN=RPS20 PE=1 SV=3	1	1	3	3	6	7.24468	2.72674	24.0689	12.6733	1.64397e-06	9.32563e-06	5.90464	0.979913	1	1	MUT - Control	limma	1.64397e-06	9.32563e-06	TRUE	enriched hit	7.24468
RPS3	P05750	40S ribosomal protein S3 OS=Saccharomyces cerevisiae (strain ATCC 204508 / S288c) GN=RPS3 PE=1 SV=5	1	1	3	3	9	7.37885	3.04825	25.0631	12.6708	1.64642e-06	9.32563e-06	5.90312	0.979917	1	1	MUT - Control	limma	1.64642e-06	9.32563e-06	TRUE	enriched hit	7.37885
VMA2	P16140	V-type proton ATPase subunit B OS=Saccharomyces cerevisiae (strain ATCC 204508 / S288c) GN=VMA2 PE=1 SV=2	1	1	3	3	6	6.62243	2.92892	22.9143	12.6186	1.69837e-06	9.46035e-06	5.87161	0.979999	1	1	MUT - Control	limma	1.69837e-06	9.46035e-06	TRUE	enriched hit	6.62243
MRPS35	P53292	37S ribosomal protein S35, mitochondrial OS=Saccharomyces cerevisiae (strain ATCC 204508 / S288c) GN=MRPS35 PE=1 SV=1	1	1	3	3	2	5.71274	2.30832	20.175	12.5842	1.73365e-06	9.46035e-06	5.85075	0.980054	1	1	MUT - Control	limma	1.73365e-06	9.46035e-06	TRUE	enriched hit	5.71274
PDH1	Q12428	Probable 2-methylcitrate dehydratase OS=Saccharomyces cerevisiae (strain ATCC 204508 / S288c) GN=PDH1 PE=1 SV=1	1	1	3	3	8	7.23103	2.65657	23.3323	12.5586	1.76039e-06	9.46035e-06	5.8352	0.980094	1	1	MUT - Control	limma	1.76039e-06	9.46035e-06	TRUE	enriched hit	7.23103
SHM2	P37291	Serine hydroxymethyltransferase, cytosolic OS=Saccharomyces cerevisiae (strain ATCC 204508 / S288c) GN=SHM2 PE=1 SV=2	1	1	3	3	10	7.21827	2.59749	24.5154	12.5553	1.76391e-06	9.46035e-06	5.83318	0.9801	1	1	MUT - Control	limma	1.76391e-06	9.46035e-06	TRUE	enriched hit	7.21827
YPK2	P18961	Serine/threonine-protein kinase YPK2/YKR2 OS=Saccharomyces cerevisiae (strain ATCC 204508 / S288c) GN=YPK2 PE=1 SV=1	1	1	3	3	3	5.64063	3.37777	21.4553	12.5501	1.76947e-06	9.46035e-06	5.82998	0.980108	1	1	MUT - Control	limma	1.76947e-06	9.46035e-06	TRUE	enriched hit	5.64063
ERB1	Q04660	Ribosome biogenesis protein ERB1 OS=Saccharomyces cerevisiae (strain ATCC 204508 / S288c) GN=ERB1 PE=1 SV=1	1	1	3	3	5	6.03005	3.06171	22.1103	12.5021	1.82122e-06	9.46035e-06	5.80069	0.980184	1	1	MUT - Control	limma	1.82122e-06	9.46035e-06	TRUE	enriched hit	6.03005
COX2	P00410	Cytochrome c oxidase subunit 2 OS=Saccharomyces cerevisiae (strain ATCC 204508 / S288c) GN=COX2 PE=1 SV=1	1	1	3	3	2	6.52284	2.32731	21.2243	12.4978	1.82594e-06	9.46035e-06	5.79807	0.980191	1	1	MUT - Control	limma	1.82594e-06	9.46035e-06	TRUE	enriched hit	6.52284
NOC2	P39744	Nucleolar complex protein 2 OS=Saccharomyces cerevisiae (strain ATCC 204508 / S288c) GN=NOC2 PE=1 SV=2	1	1	3	3	2	6.1396	2.44599	22.2065	12.489	1.83561e-06	9.46035e-06	5.7927	0.980205	1	1	MUT - Control	limma	1.83561e-06	9.46035e-06	TRUE	enriched hit	6.1396
DOT5	P40553	Peroxiredoxin DOT5 OS=Saccharomyces cerevisiae (strain ATCC 204508 / S288c) GN=DOT5 PE=1 SV=1	1	1	3	3	5	6.42744	2.65091	23.1185	12.4824	1.8429e-06	9.46035e-06	5.78867	0.980215	1	1	MUT - Control	limma	1.8429e-06	9.46035e-06	TRUE	enriched hit	6.42744
RPT6	Q01939	26S protease regulatory subunit 8 homolog OS=Saccharomyces cerevisiae (strain ATCC 204508 / S288c) GN=RPT6 PE=1 SV=4	1	1	3	3	4	5.99406	2.42014	22.0467	12.4747	1.85148e-06	9.46035e-06	5.78394	0.980227	1	1	MUT - Control	limma	1.85148e-06	9.46035e-06	TRUE	enriched hit	5.99406
YTM1	Q12024	Ribosome biogenesis protein YTM1 OS=Saccharomyces cerevisiae (strain ATCC 204508 / S288c) GN=YTM1 PE=1 SV=1	1	1	3	3	2	6.12499	3.32431	21.5567	12.4662	1.86098e-06	9.46035e-06	5.77874	0.980241	1	1	MUT - Control	limma	1.86098e-06	9.46035e-06	TRUE	enriched hit	6.12499
CKA2	P19454	Casein kinase II subunit alpha' OS=Saccharomyces cerevisiae (strain ATCC 204508 / S288c) GN=CKA2 PE=1 SV=2	1	1	3	3	4	7.02722	2.26688	22.4464	12.4659	1.86142e-06	9.46035e-06	5.7785	0.980241	1	1	MUT - Control	limma	1.86142e-06	9.46035e-06	TRUE	enriched hit	7.02722
FUM1	P08417	Fumarate hydratase, mitochondrial OS=Saccharomyces cerevisiae (strain ATCC 204508 / S288c) GN=FUM1 PE=1 SV=2	1	1	3	3	5	6.08979	2.47679	22.1986	12.4652	1.86213e-06	9.46035e-06	5.77811	0.980242	1	1	MUT - Control	limma	1.86213e-06	9.46035e-06	TRUE	enriched hit	6.08979
SHM1	P37292	Serine hydroxymethyltransferase, mitochondrial OS=Saccharomyces cerevisiae (strain ATCC 204508 / S288c) GN=SHM1 PE=1 SV=2	1	1	3	3	2	6.2655	2.77808	21.7333	12.4544	1.8743e-06	9.46035e-06	5.77149	0.980259	1	1	MUT - Control	limma	1.8743e-06	9.46035e-06	TRUE	enriched hit	6.2655
PDC1	P06169	Pyruvate decarboxylase isozyme 1 OS=Saccharomyces cerevisiae (strain ATCC 204508 / S288c) GN=PDC1 PE=1 SV=7	1	1	3	3	7	7.02218	3.24281	25.0777	12.4506	1.87868e-06	9.46035e-06	5.76911	0.980266	1	1	MUT - Control	limma	1.87868e-06	9.46035e-06	TRUE	enriched hit	7.02218
CLU1	Q03690	Clustered mitochondria protein 1 OS=Saccharomyces cerevisiae (strain ATCC 204508 / S288c) GN=CLU1 PE=1 SV=1	1	1	3	3	21	7.10819	3.56164	25.4514	12.4284	1.90409e-06	9.46035e-06	5.75545	0.980301	1	1	MUT - Control	limma	1.90409e-06	9.46035e-06	TRUE	enriched hit	7.10819
EGD1	Q02642	Nascent polypeptide-associated complex subunit beta-1 OS=Saccharomyces cerevisiae (strain ATCC 204508 / S288c) GN=EGD1 PE=1 SV=2	1	1	3	3	4	6.54174	3.73823	22.6045	12.4254	1.90754e-06	9.46035e-06	5.75361	0.980306	1	1	MUT - Control	limma	1.90754e-06	9.46035e-06	TRUE	enriched hit	6.54174
RPL16B	P26785	60S ribosomal protein L16-B OS=Saccharomyces cerevisiae (strain ATCC 204508 / S288c) GN=RPL16B PE=1 SV=3	1	1	3	3	9	8.13237	3.51951	25.1711	12.4232	1.91006e-06	9.46035e-06	5.75226	0.980309	1	1	MUT - Control	limma	1.91006e-06	9.46035e-06	TRUE	enriched hit	8.13237
NOP16	P40007	Nucleolar protein 16 OS=Saccharomyces cerevisiae (strain ATCC 204508 / S288c) GN=NOP16 PE=1 SV=1	1	1	3	3	2	6.03906	2.5917	20.9601	12.4166	1.91763e-06	9.46035e-06	5.74824	0.980319	1	1	MUT - Control	limma	1.91763e-06	9.46035e-06	TRUE	enriched hit	6.03906
RPT4	P53549	26S protease subunit RPT4 OS=Saccharomyces cerevisiae (strain ATCC 204508 / S288c) GN=RPT4 PE=1 SV=4	1	1	3	3	2	6.23005	2.5076	22.34	12.4057	1.93036e-06	9.46035e-06	5.74151	0.980337	1	1	MUT - Control	limma	1.93036e-06	9.46035e-06	TRUE	enriched hit	6.23005
PUF3	Q07807	mRNA-binding protein PUF3 OS=Saccharomyces cerevisiae (strain ATCC 204508 / S288c) GN=PUF3 PE=1 SV=1	1	1	3	3	2	5.71591	3.31939	19.3918	12.4044	1.93196e-06	9.46035e-06	5.74067	0.980339	1	1	MUT - Control	limma	1.93196e-06	9.46035e-06	TRUE	enriched hit	5.71591
IST2	P38250	Increased sodium tolerance protein 2 OS=Saccharomyces cerevisiae (strain ATCC 204508 / S288c) GN=IST2 PE=1 SV=2	1	1	3	3	3	6.08686	2.44218	21.6888	12.3815	1.95891e-06	9.51165e-06	5.72657	0.980375	1	1	MUT - Control	limma	1.95891e-06	9.51165e-06	TRUE	enriched hit	6.08686
RPA135	P22138	DNA-directed RNA polymerase I subunit RPA135 OS=Saccharomyces cerevisiae (strain ATCC 204508 / S288c) GN=RPA135 PE=1 SV=1	1	1	3	3	2	5.88323	2.56954	21.0398	12.3684	1.97463e-06	9.51165e-06	5.71843	0.980396	1	1	MUT - Control	limma	1.97463e-06	9.51165e-06	TRUE	enriched hit	5.88323
MET17	P06106	Homocysteine/cysteine synthase OS=Saccharomyces cerevisiae (strain ATCC 204508 / S288c) GN=MET17 PE=1 SV=3	1	1	3	3	2	5.71746	2.67662	19.6059	12.3639	1.98003e-06	9.51165e-06	5.71565	0.980403	1	1	MUT - Control	limma	1.98003e-06	9.51165e-06	TRUE	enriched hit	5.71746
PGM2	P37012	Phosphoglucomutase 2 OS=Saccharomyces cerevisiae (strain ATCC 204508 / S288c) GN=PGM2 PE=1 SV=1	1	1	3	3	8	6.31261	2.3266	23.6459	12.3458	2.00193e-06	9.5154e-06	5.70445	0.980432	1	1	MUT - Control	limma	2.00193e-06	9.5154e-06	TRUE	enriched hit	6.31261
ADH3	P07246	Alcohol dehydrogenase 3, mitochondrial OS=Saccharomyces cerevisiae (strain ATCC 204508 / S288c) GN=ADH3 PE=1 SV=2	1	1	3	3	7	6.47823	2.79648	23.3813	12.3426	2.00588e-06	9.5154e-06	5.70244	0.980437	1	1	MUT - Control	limma	2.00588e-06	9.5154e-06	TRUE	enriched hit	6.47823
YAF9	P53930	Protein AF-9 homolog OS=Saccharomyces cerevisiae (strain ATCC 204508 / S288c) GN=YAF9 PE=1 SV=1	1	1	3	3	2	5.95231	2.47034	21.3518	12.3207	2.03283e-06	9.58335e-06	5.68884	0.980471	1	1	MUT - Control	limma	2.03283e-06	9.58335e-06	TRUE	enriched hit	5.95231
YEL020C	P39994	Putative 2-hydroxyacyl-CoA lyase OS=Saccharomyces cerevisiae (strain ATCC 204508 / S288c) GN=YEL020C PE=1 SV=1	1	1	3	3	2	6.28719	2.82336	21.5307	12.2799	2.08413e-06	9.76453e-06	5.66345	0.980536	1	1	MUT - Control	limma	2.08413e-06	9.76453e-06	TRUE	enriched hit	6.28719
CDC60	P26637	Leucine--tRNA ligase, cytoplasmic OS=Saccharomyces cerevisiae (strain ATCC 204508 / S288c) GN=CDC60 PE=1 SV=1	1	1	3	3	6	6.15807	2.49776	22.6908	12.267	2.1006e-06	9.78133e-06	5.65542	0.980556	1	1	MUT - Control	limma	2.1006e-06	9.78133e-06	TRUE	enriched hit	6.15807
VPS5	Q92331	Vacuolar protein sorting-associated protein 5 OS=Saccharomyces cerevisiae (strain ATCC 204508 / S288c) GN=VPS5 PE=1 SV=1	1	1	3	3	3	5.82216	2.41804	21.7701	12.2333	2.14446e-06	9.85025e-06	5.63435	0.98061	1	1	MUT - Control	limma	2.14446e-06	9.85025e-06	TRUE	enriched hit	5.82216
MRPL10	P36520	54S ribosomal protein L10, mitochondrial OS=Saccharomyces cerevisiae (strain ATCC 204508 / S288c) GN=MRPL10 PE=1 SV=2	1	1	3	3	2	6.62826	2.8891	22.729	12.2317	2.14652e-06	9.85025e-06	5.63337	0.980612	1	1	MUT - Control	limma	2.14652e-06	9.85025e-06	TRUE	enriched hit	6.62826
TAF5	P38129	Transcription initiation factor TFIID subunit 5 OS=Saccharomyces cerevisiae (strain ATCC 204508 / S288c) GN=TAF5 PE=1 SV=1	1	1	3	3	4	5.78647	2.47731	21.7077	12.216	2.16735e-06	9.85025e-06	5.62352	0.980637	1	1	MUT - Control	limma	2.16735e-06	9.85025e-06	TRUE	enriched hit	5.78647
BBC1	P47068	Myosin tail region-interacting protein MTI1 OS=Saccharomyces cerevisiae (strain ATCC 204508 / S288c) GN=BBC1 PE=1 SV=2	1	1	3	3	6	6.46664	2.96872	23.2575	12.2159	2.1675e-06	9.85025e-06	5.62345	0.980637	1	1	MUT - Control	limma	2.1675e-06	9.85025e-06	TRUE	enriched hit	6.46664
ICL1	P28240	Isocitrate lyase OS=Saccharomyces cerevisiae (strain ATCC 204508 / S288c) GN=ICL1 PE=1 SV=1	1	1	3	3	12	7.21175	2.46839	25.4244	12.2063	2.18029e-06	9.85025e-06	5.61745	0.980653	1	1	MUT - Control	limma	2.18029e-06	9.85025e-06	TRUE	enriched hit	7.21175
RPL9B	P51401	60S ribosomal protein L9-B OS=Saccharomyces cerevisiae (strain ATCC 204508 / S288c) GN=RPL9B PE=1 SV=1	1	1	3	3	7	7.3492	3.00876	23.883	12.1906	2.20155e-06	9.88742e-06	5.60755	0.980678	1	1	MUT - Control	limma	2.20155e-06	9.88742e-06	TRUE	enriched hit	7.3492
COR1	P07256	Cytochrome b-c1 complex subunit 1, mitochondrial OS=Saccharomyces cerevisiae (strain ATCC 204508 / S288c) GN=COR1 PE=1 SV=1	1	1	3	3	8	6.79034	2.9215	24.2273	12.1721	2.22681e-06	9.94205e-06	5.5959	0.980707	1	1	MUT - Control	limma	2.22681e-06	9.94205e-06	TRUE	enriched hit	6.79034
RLI1	Q03195	Translation initiation factor RLI1 OS=Saccharomyces cerevisiae (strain ATCC 204508 / S288c) GN=RLI1 PE=1 SV=1	1	1	3	3	3	6.0558	2.54052	22.2256	12.1543	2.25141e-06	9.99312e-06	5.58468	0.980735	1	1	MUT - Control	limma	2.25141e-06	9.99312e-06	TRUE	enriched hit	6.0558
VPS33	P20795	Vacuolar protein sorting-associated protein 33 OS=Saccharomyces cerevisiae (strain ATCC 204508 / S288c) GN=VPS33 PE=1 SV=1	1	1	3	3	2	5.59498	2.48925	20.875	12.138	2.27416e-06	1.00354e-05	5.57442	0.980761	1	1	MUT - Control	limma	2.27416e-06	1.00354e-05	TRUE	enriched hit	5.59498
NAT10	P53914	RNA cytidine acetyltransferase OS=Saccharomyces cerevisiae (strain ATCC 204508 / S288c) GN=NAT10 PE=1 SV=1	1	1	3	3	3	5.58768	2.2758	20.8328	12.0627	2.38291e-06	1.04545e-05	5.5267	0.98088	1	1	MUT - Control	limma	2.38291e-06	1.04545e-05	TRUE	enriched hit	5.58768
ALD6	P54115	Magnesium-activated aldehyde dehydrogenase, cytosolic OS=Saccharomyces cerevisiae (strain ATCC 204508 / S288c) GN=ALD6 PE=1 SV=4	1	1	3	3	6	6.29411	2.37742	23.0158	12.0151	2.45457e-06	1.06554e-05	5.4964	0.980956	1	1	MUT - Control	limma	2.45457e-06	1.06554e-05	TRUE	enriched hit	6.29411
AGX1	P43567	Alanine--glyoxylate aminotransferase 1 OS=Saccharomyces cerevisiae (strain ATCC 204508 / S288c) GN=AGX1 PE=1 SV=1	1	1	3	3	2	6.22012	2.34254	20.5589	12.004	2.47168e-06	1.06554e-05	5.48929	0.980973	1	1	MUT - Control	limma	2.47168e-06	1.06554e-05	TRUE	enriched hit	6.22012
SCS2	P40075	Vesicle-associated membrane protein-associated protein SCS2 OS=Saccharomyces cerevisiae (strain ATCC 204508 / S288c) GN=SCS2 PE=1 SV=3	1	1	3	3	4	5.86934	2.2084	21.8923	12.0034	2.47253e-06	1.06554e-05	5.48894	0.980974	1	1	MUT - Control	limma	2.47253e-06	1.06554e-05	TRUE	enriched hit	5.86934
KNS1	P32350	Dual specificity protein kinase KNS1 OS=Saccharomyces cerevisiae (strain ATCC 204508 / S288c) GN=KNS1 PE=1 SV=2	1	1	3	3	5	5.84177	2.36193	22.1902	11.9954	2.48487e-06	1.06554e-05	5.48385	0.980987	1	1	MUT - Control	limma	2.48487e-06	1.06554e-05	TRUE	enriched hit	5.84177
RVB1	Q03940	RuvB-like protein 1 OS=Saccharomyces cerevisiae (strain ATCC 204508 / S288c) GN=RVB1 PE=1 SV=1	1	1	3	3	4	6.53464	2.22556	21.5985	11.9774	2.51304e-06	1.07157e-05	5.47231	0.981015	1	1	MUT - Control	limma	2.51304e-06	1.07157e-05	TRUE	enriched hit	6.53464
RPG1	P38249	Eukaryotic translation initiation factor 3 subunit A OS=Saccharomyces cerevisiae (strain ATCC 204508 / S288c) GN=RPG1 PE=1 SV=1	1	1	3	3	9	6.4048	2.22965	24.105	11.9558	2.54735e-06	1.08013e-05	5.45843	0.98105	1	1	MUT - Control	limma	2.54735e-06	1.08013e-05	TRUE	enriched hit	6.4048
DBP2	P24783	ATP-dependent RNA helicase DBP2 OS=Saccharomyces cerevisiae (strain ATCC 204508 / S288c) GN=DBP2 PE=1 SV=1	1	1	3	3	4	6.1912	2.28799	22.0071	11.9229	2.60044e-06	1.09652e-05	5.43732	0.981102	1	1	MUT - Control	limma	2.60044e-06	1.09652e-05	TRUE	enriched hit	6.1912
CRC1	Q12289	Mitochondrial carnitine carrier OS=Saccharomyces cerevisiae (strain ATCC 204508 / S288c) GN=CRC1 PE=1 SV=1	1	1	3	3	4	6.04716	2.19747	22.5963	11.9121	2.6182e-06	1.09791e-05	5.43034	0.981119	1	1	MUT - Control	limma	2.6182e-06	1.09791e-05	TRUE	enriched hit	6.04716
PRP43	P53131	Pre-mRNA-splicing factor ATP-dependent RNA helicase PRP43 OS=Saccharomyces cerevisiae (strain ATCC 204508 / S288c) GN=PRP43 PE=1 SV=1	1	1	3	3	5	6.35077	3.04688	22.3249	11.8294	2.75843e-06	1.15036e-05	5.37688	0.98125	1	1	MUT - Control	limma	2.75843e-06	1.15036e-05	TRUE	enriched hit	6.35077
PYC1	P11154	Pyruvate carboxylase 1 OS=Saccharomyces cerevisiae (strain ATCC 204508 / S288c) GN=PYC1 PE=1 SV=2	1	1	3	3	12	6.64887	2.19295	24.0945	11.8093	2.7937e-06	1.1587e-05	5.36385	0.981282	1	1	MUT - Control	limma	2.7937e-06	1.1587e-05	TRUE	enriched hit	6.64887
ADE13	Q05911	Adenylosuccinate lyase OS=Saccharomyces cerevisiae (strain ATCC 204508 / S288c) GN=ADE13 PE=1 SV=1	1	1	3	3	7	6.2105	2.34682	23.4416	11.7931	2.82261e-06	1.16045e-05	5.35329	0.981308	1	1	MUT - Control	limma	2.82261e-06	1.16045e-05	TRUE	enriched hit	6.2105
EFT1	P32324	Elongation factor 2 OS=Saccharomyces cerevisiae (strain ATCC 204508 / S288c) GN=EFT1 PE=1 SV=1	1	1	3	3	18	7.3045	2.38884	25.5173	11.7898	2.8285e-06	1.16045e-05	5.35115	0.981313	1	1	MUT - Control	limma	2.8285e-06	1.16045e-05	TRUE	enriched hit	7.3045
ADE6	P38972	Phosphoribosylformylglycinamidine synthase OS=Saccharomyces cerevisiae (strain ATCC 204508 / S288c) GN=ADE6 PE=1 SV=2	1	1	3	3	2	5.60782	2.41752	20.0563	11.7719	2.86091e-06	1.16744e-05	5.33946	0.981341	1	1	MUT - Control	limma	2.86091e-06	1.16744e-05	TRUE	enriched hit	5.60782
GUS1	P46655	Glutamate--tRNA ligase, cytoplasmic OS=Saccharomyces cerevisiae (strain ATCC 204508 / S288c) GN=GUS1 PE=1 SV=3	1	1	3	3	5	6.20945	2.52801	22.2065	11.7624	2.87823e-06	1.16813e-05	5.33327	0.981356	1	1	MUT - Control	limma	2.87823e-06	1.16813e-05	TRUE	enriched hit	6.20945
BRE1	Q07457	E3 ubiquitin-protein ligase BRE1 OS=Saccharomyces cerevisiae (strain ATCC 204508 / S288c) GN=BRE1 PE=1 SV=1	1	1	3	3	12	6.25453	2.41417	23.9813	11.7541	2.8934e-06	1.16813e-05	5.32788	0.981369	1	1	MUT - Control	limma	2.8934e-06	1.16813e-05	TRUE	enriched hit	6.25453
RPL29	P05747	60S ribosomal protein L29 OS=Saccharomyces cerevisiae (strain ATCC 204508 / S288c) GN=RPL29 PE=1 SV=3	1	1	3	3	2	6.08376	3.50856	24.2965	11.7285	2.94102e-06	1.18108e-05	5.31112	0.98141	1	1	MUT - Control	limma	2.94102e-06	1.18108e-05	TRUE	enriched hit	6.08376
ACT1	P60010	Actin OS=Saccharomyces cerevisiae (strain ATCC 204508 / S288c) GN=ACT1 PE=1 SV=1	1	1	3	3	4	7.01936	2.42101	23.0246	11.6888	3.01663e-06	1.20506e-05	5.28506	0.981473	1	1	MUT - Control	limma	3.01663e-06	1.20506e-05	TRUE	enriched hit	7.01936
EBP2	P36049	rRNA-processing protein EBP2 OS=Saccharomyces cerevisiae (strain ATCC 204508 / S288c) GN=EBP2 PE=1 SV=1	1	1	3	3	5	6.07885	2.91053	22.0251	11.6699	3.0532e-06	1.21329e-05	5.27268	0.981503	1	1	MUT - Control	limma	3.0532e-06	1.21329e-05	TRUE	enriched hit	6.07885
ISW2	Q08773	ISWI chromatin-remodeling complex ATPase ISW2 OS=Saccharomyces cerevisiae (strain ATCC 204508 / S288c) GN=ISW2 PE=1 SV=1	1	1	3	3	4	5.74283	2.316	21.3565	11.5847	3.22512e-06	1.27036e-05	5.21637	0.981638	1	1	MUT - Control	limma	3.22512e-06	1.27036e-05	TRUE	enriched hit	5.74283
MDJ1	P35191	DnaJ homolog 1, mitochondrial OS=Saccharomyces cerevisiae (strain ATCC 204508 / S288c) GN=MDJ1 PE=1 SV=1	1	1	3	3	3	6.23831	2.2321	22.5533	11.5822	3.23029e-06	1.27036e-05	5.21472	0.981642	1	1	MUT - Control	limma	3.23029e-06	1.27036e-05	TRUE	enriched hit	6.23831
TYS1	P36421	Tyrosine--tRNA ligase, cytoplasmic OS=Saccharomyces cerevisiae (strain ATCC 204508 / S288c) GN=TYS1 PE=1 SV=3	1	1	3	3	4	6.18187	2.64385	21.7062	11.57	3.25591e-06	1.27072e-05	5.2066	0.981661	1	1	MUT - Control	limma	3.25591e-06	1.27072e-05	TRUE	enriched hit	6.18187
LSC2	P53312	Succinyl-CoA ligase [ADP-forming] subunit beta, mitochondrial OS=Saccharomyces cerevisiae (strain ATCC 204508 / S288c) GN=LSC2 PE=1 SV=1	1	1	3	3	5	6.10069	2.1813	22.4139	11.5641	3.26844e-06	1.27072e-05	5.20265	0.98167	1	1	MUT - Control	limma	3.26844e-06	1.27072e-05	TRUE	enriched hit	6.10069
TUB1|TUB3	P09733|P09734	Tubulin alpha-1 chain OS=Saccharomyces cerevisiae (strain ATCC 204508 / S288c) GN=TUB1 PE=1 SV=2|Tubulin alpha-3 chain OS=Saccharomyces cerevisiae (strain ATCC 204508 / S288c) GN=TUB3 PE=1 SV=1	1	1	3	3	2	6.38063	2.64498	21.3118	11.5579	3.28143e-06	1.27072e-05	5.19857	0.98168	1	1	MUT - Control	limma	3.28143e-06	1.27072e-05	TRUE	enriched hit	6.38063
SLA1	P32790	Actin cytoskeleton-regulatory complex protein SLA1 OS=Saccharomyces cerevisiae (strain ATCC 204508 / S288c) GN=SLA1 PE=1 SV=1	1	1	3	3	3	5.93178	2.18759	20.614	11.5343	3.33192e-06	1.28372e-05	5.18285	0.981718	1	1	MUT - Control	limma	3.33192e-06	1.28372e-05	TRUE	enriched hit	5.93178
SNF1	P06782	Carbon catabolite-derepressing protein kinase OS=Saccharomyces cerevisiae (strain ATCC 204508 / S288c) GN=SNF1 PE=1 SV=1	1	1	3	3	3	6.4501	2.85175	22.5107	11.4894	3.43048e-06	1.31021e-05	5.15285	0.981789	1	1	MUT - Control	limma	3.43048e-06	1.31021e-05	TRUE	enriched hit	6.4501
RPL43A|RPL43B	P0CX25|P0CX26	60S ribosomal protein L43-A OS=Saccharomyces cerevisiae (strain ATCC 204508 / S288c) GN=RPL43A PE=1 SV=1|60S ribosomal protein L43-B OS=Saccharomyces cerevisiae (strain ATCC 204508 / S288c) GN=RPL43B PE=1 SV=1	1	1	3	3	4	7.54902	3.51103	24.0305	11.4869	3.43606e-06	1.31021e-05	5.15117	0.981793	1	1	MUT - Control	limma	3.43606e-06	1.31021e-05	TRUE	enriched hit	7.54902
TFC4	P33339	Transcription factor tau 131 kDa subunit OS=Saccharomyces cerevisiae (strain ATCC 204508 / S288c) GN=TFC4 PE=1 SV=1	1	1	3	3	4	5.77074	2.64646	21.4698	11.4795	3.45245e-06	1.31021e-05	5.14627	0.981804	1	1	MUT - Control	limma	3.45245e-06	1.31021e-05	TRUE	enriched hit	5.77074
CWP1	P28319	Cell wall protein CWP1 OS=Saccharomyces cerevisiae (strain ATCC 204508 / S288c) GN=CWP1 PE=1 SV=2	1	1	3	3	3	6.97067	3.85682	23.5721	11.4625	3.49085e-06	1.31192e-05	5.13488	0.981831	1	1	MUT - Control	limma	3.49085e-06	1.31192e-05	TRUE	enriched hit	6.97067
VMA13	P41807	V-type proton ATPase subunit H OS=Saccharomyces cerevisiae (strain ATCC 204508 / S288c) GN=VMA13 PE=1 SV=1	1	1	3	3	2	5.55877	2.13742	20.6433	11.4608	3.49477e-06	1.31192e-05	5.13373	0.981834	1	1	MUT - Control	limma	3.49477e-06	1.31192e-05	TRUE	enriched hit	5.55877
BGL2	P15703	Glucan 1,3-beta-glucosidase OS=Saccharomyces cerevisiae (strain ATCC 204508 / S288c) GN=BGL2 PE=1 SV=1	1	1	3	3	2	6.49889	2.68561	22.1416	11.4533	3.51205e-06	1.31192e-05	5.12864	0.981846	1	1	MUT - Control	limma	3.51205e-06	1.31192e-05	TRUE	enriched hit	6.49889
FOX2	Q02207	Peroxisomal hydratase-dehydrogenase-epimerase OS=Saccharomyces cerevisiae (strain ATCC 204508 / S288c) GN=FOX2 PE=2 SV=1	1	1	3	3	20	7.2502	3.94178	25.1459	11.4417	3.53853e-06	1.31192e-05	5.12091	0.981864	1	1	MUT - Control	limma	3.53853e-06	1.31192e-05	TRUE	enriched hit	7.2502
PDA1	P16387	Pyruvate dehydrogenase E1 component subunit alpha, mitochondrial OS=Saccharomyces cerevisiae (strain ATCC 204508 / S288c) GN=PDA1 PE=1 SV=2	1	1	3	3	3	6.27457	2.76548	21.9076	11.4304	3.56479e-06	1.31192e-05	5.11329	0.981882	1	1	MUT - Control	limma	3.56479e-06	1.31192e-05	TRUE	enriched hit	6.27457
MRPS9	P38120	37S ribosomal protein S9, mitochondrial OS=Saccharomyces cerevisiae (strain ATCC 204508 / S288c) GN=MRPS9 PE=1 SV=1	1	1	3	3	3	6.38743	2.94765	22.8403	11.4297	3.5663e-06	1.31192e-05	5.11285	0.981883	1	1	MUT - Control	limma	3.5663e-06	1.31192e-05	TRUE	enriched hit	6.38743
RPL16A	P26784	60S ribosomal protein L16-A OS=Saccharomyces cerevisiae (strain ATCC 204508 / S288c) GN=RPL16A PE=1 SV=3	1	1	3	3	6	7.52761	3.99169	23.4284	11.4179	3.5941e-06	1.31192e-05	5.10485	0.981902	1	1	MUT - Control	limma	3.5941e-06	1.31192e-05	TRUE	enriched hit	7.52761
MDM38	Q08179	Mitochondrial distribution and morphology protein 38 OS=Saccharomyces cerevisiae (strain ATCC 204508 / S288c) GN=MDM38 PE=1 SV=1	1	1	3	3	2	5.76009	2.04446	22.0686	11.415	3.6008e-06	1.31192e-05	5.10293	0.981907	1	1	MUT - Control	limma	3.6008e-06	1.31192e-05	TRUE	enriched hit	5.76009
GDH2	P33327	NAD-specific glutamate dehydrogenase OS=Saccharomyces cerevisiae (strain ATCC 204508 / S288c) GN=GDH2 PE=1 SV=1	1	1	3	3	6	6.08513	2.4376	22.9308	11.41	3.61253e-06	1.31192e-05	5.09958	0.981915	1	1	MUT - Control	limma	3.61253e-06	1.31192e-05	TRUE	enriched hit	6.08513
PDI1	P17967	Protein disulfide-isomerase OS=Saccharomyces cerevisiae (strain ATCC 204508 / S288c) GN=PDI1 PE=1 SV=2	1	1	3	3	5	6.38914	2.65633	22.8461	11.3959	3.64614e-06	1.31782e-05	5.09003	0.981937	1	1	MUT - Control	limma	3.64614e-06	1.31782e-05	TRUE	enriched hit	6.38914
TEF1	P02994	Elongation factor 1-alpha OS=Saccharomyces cerevisiae (strain ATCC 204508 / S288c) GN=TEF1 PE=1 SV=1	1	1	3	3	11	8.0807	2.19433	26.5967	11.3713	3.70525e-06	1.32686e-05	5.07345	0.981976	1	1	MUT - Control	limma	3.70525e-06	1.32686e-05	TRUE	enriched hit	8.0807
ARP8	Q12386	Actin-like protein ARP8 OS=Saccharomyces cerevisiae (strain ATCC 204508 / S288c) GN=ARP8 PE=1 SV=1	1	1	3	3	4	6.03831	2.41792	22.334	11.371	3.7061e-06	1.32686e-05	5.07322	0.981976	1	1	MUT - Control	limma	3.7061e-06	1.32686e-05	TRUE	enriched hit	6.03831
MRPL3	P36516	54S ribosomal protein L3, mitochondrial OS=Saccharomyces cerevisiae (strain ATCC 204508 / S288c) GN=MRPL3 PE=1 SV=2	1	1	3	3	4	5.57792	2.32694	21.3905	11.3608	3.73104e-06	1.32951e-05	5.0663	0.981993	1	1	MUT - Control	limma	3.73104e-06	1.32951e-05	TRUE	enriched hit	5.57792
MYO2	P19524	Myosin-2 OS=Saccharomyces cerevisiae (strain ATCC 204508 / S288c) GN=MYO2 PE=1 SV=1	1	1	3	3	5	6.09996	2.4214	23.0525	11.3456	3.76831e-06	1.33087e-05	5.05605	0.982017	1	1	MUT - Control	limma	3.76831e-06	1.33087e-05	TRUE	enriched hit	6.09996
RPN2	P32565	26S proteasome regulatory subunit RPN2 OS=Saccharomyces cerevisiae (strain ATCC 204508 / S288c) GN=RPN2 PE=1 SV=4	1	1	3	3	6	6.09209	2.15833	23.0495	11.345	3.76991e-06	1.33087e-05	5.05561	0.982018	1	1	MUT - Control	limma	3.76991e-06	1.33087e-05	TRUE	enriched hit	6.09209
AMS1	P22855	Alpha-mannosidase OS=Saccharomyces cerevisiae (strain ATCC 204508 / S288c) GN=AMS1 PE=1 SV=2	1	1	3	3	2	5.76688	2.24161	21.46	11.3311	3.80458e-06	1.33161e-05	5.04617	0.98204	1	1	MUT - Control	limma	3.80458e-06	1.33161e-05	TRUE	enriched hit	5.76688
RPL15A	P05748	60S ribosomal protein L15-A OS=Saccharomyces cerevisiae (strain ATCC 204508 / S288c) GN=RPL15A PE=1 SV=3	1	1	3	3	7	8.06572	4.4603	25.0713	11.3301	3.8071e-06	1.33161e-05	5.04549	0.982041	1	1	MUT - Control	limma	3.8071e-06	1.33161e-05	TRUE	enriched hit	8.06572
SEC63	P14906	Protein translocation protein SEC63 OS=Saccharomyces cerevisiae (strain ATCC 204508 / S288c) GN=SEC63 PE=1 SV=2	1	1	3	3	4	5.81788	2.48648	21.8394	11.2847	3.92261e-06	1.36038e-05	5.01464	0.982113	1	1	MUT - Control	limma	3.92261e-06	1.36038e-05	TRUE	enriched hit	5.81788
CDC19	P00549	Pyruvate kinase 1 OS=Saccharomyces cerevisiae (strain ATCC 204508 / S288c) GN=CDC19 PE=1 SV=2	1	1	3	3	12	7.41103	2.05777	24.6137	11.2837	3.92521e-06	1.36038e-05	5.01396	0.982115	1	1	MUT - Control	limma	3.92521e-06	1.36038e-05	TRUE	enriched hit	7.41103
LAT1	P12695	Dihydrolipoyllysine-residue acetyltransferase component of pyruvate dehydrogenase complex, mitochondrial OS=Saccharomyces cerevisiae (strain ATCC 204508 / S288c) GN=LAT1 PE=1 SV=1	1	1	3	3	10	6.83723	2.5515	24.8696	11.2692	3.9629e-06	1.3672e-05	5.00409	0.982138	1	1	MUT - Control	limma	3.9629e-06	1.3672e-05	TRUE	enriched hit	6.83723
RSC2	Q06488	Chromatin structure-remodeling complex subunit RSC2 OS=Saccharomyces cerevisiae (strain ATCC 204508 / S288c) GN=RSC2 PE=1 SV=1	1	1	3	3	2	6.04496	2.85337	20.545	11.236	4.05122e-06	1.3866e-05	4.98133	0.98219	1	1	MUT - Control	limma	4.05122e-06	1.3866e-05	TRUE	enriched hit	6.04496
RSP5	P39940	E3 ubiquitin-protein ligase RSP5 OS=Saccharomyces cerevisiae (strain ATCC 204508 / S288c) GN=RSP5 PE=1 SV=1	1	1	3	3	3	5.88234	2.29702	21.7423	11.2343	4.05565e-06	1.3866e-05	4.9802	0.982193	1	1	MUT - Control	limma	4.05565e-06	1.3866e-05	TRUE	enriched hit	5.88234
HMO1	Q03973	High mobility group protein 1 OS=Saccharomyces cerevisiae (strain ATCC 204508 / S288c) GN=HMO1 PE=1 SV=1	1	1	3	3	4	6.89528	2.94682	23.3919	11.2233	4.08542e-06	1.38869e-05	4.97265	0.982211	1	1	MUT - Control	limma	4.08542e-06	1.38869e-05	TRUE	enriched hit	6.89528
MST1	P07236	Threonine--tRNA ligase, mitochondrial OS=Saccharomyces cerevisiae (strain ATCC 204508 / S288c) GN=MST1 PE=1 SV=2	1	1	3	3	3	5.8967	2.84794	21.4035	11.2085	4.12568e-06	1.38869e-05	4.96252	0.982234	1	1	MUT - Control	limma	4.12568e-06	1.38869e-05	TRUE	enriched hit	5.8967
SCY1	P53009	Protein kinase-like protein SCY1 OS=Saccharomyces cerevisiae (strain ATCC 204508 / S288c) GN=SCY1 PE=1 SV=1	1	1	3	3	4	5.69462	2.356	21.6417	11.2069	4.13008e-06	1.38869e-05	4.96142	0.982236	1	1	MUT - Control	limma	4.13008e-06	1.38869e-05	TRUE	enriched hit	5.69462
LAP3	Q01532|Q01532-2	Cysteine proteinase 1, mitochondrial OS=Saccharomyces cerevisiae (strain ATCC 204508 / S288c) GN=LAP3 PE=1 SV=3|Isoform Cytoplasmic of Cysteine proteinase 1, mitochondrial OS=Saccharomyces cerevisiae (strain ATCC 204508 / S288c) GN=LAP3	1	1	3	3	3	5.99191	2.56882	21.3396	11.2051	4.13496e-06	1.38869e-05	4.9602	0.982239	1	1	MUT - Control	limma	4.13496e-06	1.38869e-05	TRUE	enriched hit	5.99191
MRPL24	P36525	54S ribosomal protein L24, mitochondrial OS=Saccharomyces cerevisiae (strain ATCC 204508 / S288c) GN=MRPL24 PE=1 SV=2	1	1	3	3	5	6.52052	2.53414	22.1815	11.189	4.17942e-06	1.39198e-05	4.94914	0.982265	1	1	MUT - Control	limma	4.17942e-06	1.39198e-05	TRUE	enriched hit	6.52052
PFK2	P16862	ATP-dependent 6-phosphofructokinase subunit beta OS=Saccharomyces cerevisiae (strain ATCC 204508 / S288c) GN=PFK2 PE=1 SV=4	1	1	3	3	8	6.32436	2.70743	23.3674	11.1883	4.18144e-06	1.39198e-05	4.94865	0.982266	1	1	MUT - Control	limma	4.18144e-06	1.39198e-05	TRUE	enriched hit	6.32436
RVB2	Q12464	RuvB-like protein 2 OS=Saccharomyces cerevisiae (strain ATCC 204508 / S288c) GN=RVB2 PE=1 SV=1	1	1	3	3	8	6.60828	2.40208	23.2421	11.1725	4.22568e-06	1.40056e-05	4.93777	0.982291	1	1	MUT - Control	limma	4.22568e-06	1.40056e-05	TRUE	enriched hit	6.60828
POX1	P13711	Acyl-coenzyme A oxidase OS=Saccharomyces cerevisiae (strain ATCC 204508 / S288c) GN=POX1 PE=3 SV=2	1	1	3	3	11	6.90731	3.02847	24.0314	11.1595	4.26257e-06	1.40457e-05	4.92878	0.982312	1	1	MUT - Control	limma	4.26257e-06	1.40457e-05	TRUE	enriched hit	6.90731
YER079W	P40052	Uncharacterized protein YER079W OS=Saccharomyces cerevisiae (strain ATCC 204508 / S288c) GN=YER079W PE=1 SV=1	1	1	3	3	2	5.5752	2.07688	20.5042	11.1552	4.27478e-06	1.40457e-05	4.92583	0.982318	1	1	MUT - Control	limma	4.27478e-06	1.40457e-05	TRUE	enriched hit	5.5752
TMA7	Q3E764	Translation machinery-associated protein 7 OS=Saccharomyces cerevisiae (strain ATCC 204508 / S288c) GN=TMA7 PE=1 SV=1	1	1	3	3	2	6.3567	2.50194	22.1828	11.083	4.48636e-06	1.46774e-05	4.87586	0.982433	1	1	MUT - Control	limma	4.48636e-06	1.46774e-05	TRUE	enriched hit	6.3567
PRE7	P23724	Proteasome subunit beta type-6 OS=Saccharomyces cerevisiae (strain ATCC 204508 / S288c) GN=PRE7 PE=1 SV=1	1	1	3	3	3	5.76271	1.97464	21.6601	11.0751	4.51016e-06	1.46919e-05	4.87039	0.982445	1	1	MUT - Control	limma	4.51016e-06	1.46919e-05	TRUE	enriched hit	5.76271
TRI1	Q05024	Protein TRI1 OS=Saccharomyces cerevisiae (strain ATCC 204508 / S288c) GN=TRI1 PE=1 SV=1	1	1	3	3	3	6.34533	3.09965	22.0897	11.0568	4.56614e-06	1.47549e-05	4.85762	0.982474	1	1	MUT - Control	limma	4.56614e-06	1.47549e-05	TRUE	enriched hit	6.34533
NOP12	Q08208	Nucleolar protein 12 OS=Saccharomyces cerevisiae (strain ATCC 204508 / S288c) GN=NOP12 PE=1 SV=1	1	1	3	3	3	6.12918	2.59972	21.5844	11.056	4.56838e-06	1.47549e-05	4.85711	0.982476	1	1	MUT - Control	limma	4.56838e-06	1.47549e-05	TRUE	enriched hit	6.12918
BDH1	P39714	(R,R)-butanediol dehydrogenase OS=Saccharomyces cerevisiae (strain ATCC 204508 / S288c) GN=BDH1 PE=1 SV=2	1	1	3	3	2	6.63961	2.1254	21.8356	11.0443	4.60444e-06	1.47574e-05	4.84898	0.982494	1	1	MUT - Control	limma	4.60444e-06	1.47574e-05	TRUE	enriched hit	6.63961
TSL1	P38427	Trehalose synthase complex regulatory subunit TSL1 OS=Saccharomyces cerevisiae (strain ATCC 204508 / S288c) GN=TSL1 PE=1 SV=1	1	1	3	3	4	5.91949	2.31072	21.6217	10.9763	4.82091e-06	1.53743e-05	4.8014	0.982602	1	1	MUT - Control	limma	4.82091e-06	1.53743e-05	TRUE	enriched hit	5.91949
SEG1	Q04279	Eisosome protein SEG1 OS=Saccharomyces cerevisiae (strain ATCC 204508 / S288c) GN=SEG1 PE=1 SV=1	1	1	3	3	2	6.12817	2.42625	21.582	10.9585	4.87922e-06	1.54639e-05	4.78894	0.98263	1	1	MUT - Control	limma	4.87922e-06	1.54639e-05	TRUE	enriched hit	6.12817
RPL5	P26321	60S ribosomal protein L5 OS=Saccharomyces cerevisiae (strain ATCC 204508 / S288c) GN=RPL5 PE=1 SV=4	1	1	3	3	6	7.47032	2.07663	23.3758	10.9553	4.88976e-06	1.54639e-05	4.78671	0.982635	1	1	MUT - Control	limma	4.88976e-06	1.54639e-05	TRUE	enriched hit	7.47032
GSP2	P32836	GTP-binding nuclear protein GSP2/CNR2 OS=Saccharomyces cerevisiae (strain ATCC 204508 / S288c) GN=GSP2 PE=1 SV=1	1	1	3	3	2	6.40286	4.39424	22.4014	10.9214	5.00381e-06	1.57581e-05	4.76281	0.982689	1	1	MUT - Control	limma	5.00381e-06	1.57581e-05	TRUE	enriched hit	6.40286
TOR2	P32600	Serine/threonine-protein kinase TOR2 OS=Saccharomyces cerevisiae (strain ATCC 204508 / S288c) GN=TOR2 PE=1 SV=3	1	1	3	3	3	5.62532	3.21983	20.6765	10.9154	5.02431e-06	1.57581e-05	4.75857	0.982698	1	1	MUT - Control	limma	5.02431e-06	1.57581e-05	TRUE	enriched hit	5.62532
PRB1	P09232	Cerevisin OS=Saccharomyces cerevisiae (strain ATCC 204508 / S288c) GN=PRB1 PE=1 SV=1	1	1	3	3	5	6.27062	2.1483	22.5447	10.9049	5.06033e-06	1.57906e-05	4.75116	0.982715	1	1	MUT - Control	limma	5.06033e-06	1.57906e-05	TRUE	enriched hit	6.27062
VTC4	P47075	Vacuolar transporter chaperone 4 OS=Saccharomyces cerevisiae (strain ATCC 204508 / S288c) GN=VTC4 PE=1 SV=2	1	1	3	3	3	5.68955	2.46204	20.8721	10.9003	5.0763e-06	1.57906e-05	4.7479	0.982722	1	1	MUT - Control	limma	5.0763e-06	1.57906e-05	TRUE	enriched hit	5.68955
PSA1	P41940	Mannose-1-phosphate guanyltransferase OS=Saccharomyces cerevisiae (strain ATCC 204508 / S288c) GN=PSA1 PE=1 SV=2	1	1	3	3	4	6.58721	2.44838	23.7438	10.8748	5.16535e-06	1.6002e-05	4.72986	0.982763	1	1	MUT - Control	limma	5.16535e-06	1.6002e-05	TRUE	enriched hit	6.58721
MAK21	Q12176	Ribosome biogenesis protein MAK21 OS=Saccharomyces cerevisiae (strain ATCC 204508 / S288c) GN=MAK21 PE=1 SV=1	1	1	3	3	4	5.83667	2.46277	22.2587	10.8609	5.21459e-06	1.6031e-05	4.72002	0.982785	1	1	MUT - Control	limma	5.21459e-06	1.6031e-05	TRUE	enriched hit	5.83667
SPB4	P25808	ATP-dependent rRNA helicase SPB4 OS=Saccharomyces cerevisiae (strain ATCC 204508 / S288c) GN=SPB4 PE=1 SV=1	1	1	3	3	2	5.49925	2.62815	20.1445	10.8544	5.23748e-06	1.6031e-05	4.71548	0.982795	1	1	MUT - Control	limma	5.23748e-06	1.6031e-05	TRUE	enriched hit	5.49925
ATP2	P00830	ATP synthase subunit beta, mitochondrial OS=Saccharomyces cerevisiae (strain ATCC 204508 / S288c) GN=ATP2 PE=1 SV=2	1	1	3	3	7	7.12508	2.37071	23.954	10.8543	5.23805e-06	1.6031e-05	4.71536	0.982795	1	1	MUT - Control	limma	5.23805e-06	1.6031e-05	TRUE	enriched hit	7.12508
PCT1	P13259	Choline-phosphate cytidylyltransferase OS=Saccharomyces cerevisiae (strain ATCC 204508 / S288c) GN=PCT1 PE=1 SV=2	1	1	3	3	2	5.95527	2.83352	20.8432	10.838	5.29689e-06	1.6146e-05	4.70377	0.982821	1	1	MUT - Control	limma	5.29689e-06	1.6146e-05	TRUE	enriched hit	5.95527
HOM6	P31116	Homoserine dehydrogenase OS=Saccharomyces cerevisiae (strain ATCC 204508 / S288c) GN=HOM6 PE=1 SV=1	1	1	3	3	3	6.08394	2.8712	22.4312	10.7993	5.43914e-06	1.65132e-05	4.67627	0.982882	1	1	MUT - Control	limma	5.43914e-06	1.65132e-05	TRUE	enriched hit	6.08394
TIF35	Q04067	Eukaryotic translation initiation factor 3 subunit G OS=Saccharomyces cerevisiae (strain ATCC 204508 / S288c) GN=TIF35 PE=1 SV=1	1	1	3	3	3	6.28815	2.22551	21.962	10.7852	5.49207e-06	1.66075e-05	4.66622	0.982905	1	1	MUT - Control	limma	5.49207e-06	1.66075e-05	TRUE	enriched hit	6.28815
EAF3	Q12432	Chromatin modification-related protein EAF3 OS=Saccharomyces cerevisiae (strain ATCC 204508 / S288c) GN=EAF3 PE=1 SV=1	1	1	3	3	5	6.12645	2.47367	22.8217	10.7729	5.53868e-06	1.6682e-05	4.65744	0.982924	1	1	MUT - Control	limma	5.53868e-06	1.6682e-05	TRUE	enriched hit	6.12645
RPL6A	Q02326	60S ribosomal protein L6-A OS=Saccharomyces cerevisiae (strain ATCC 204508 / S288c) GN=RPL6A PE=1 SV=2	1	1	3	3	3	6.53311	3.08916	22.0751	10.7658	5.56598e-06	1.66979e-05	4.65234	0.982936	1	1	MUT - Control	limma	5.56598e-06	1.66979e-05	TRUE	enriched hit	6.53311
UBP6	P43593	Ubiquitin carboxyl-terminal hydrolase 6 OS=Saccharomyces cerevisiae (strain ATCC 204508 / S288c) GN=UBP6 PE=1 SV=1	1	1	3	3	2	5.81619	2.1303	21.3175	10.7322	5.69627e-06	1.70215e-05	4.6283	0.982989	1	1	MUT - Control	limma	5.69627e-06	1.70215e-05	TRUE	enriched hit	5.81619
POB3	Q04636	FACT complex subunit POB3 OS=Saccharomyces cerevisiae (strain ATCC 204508 / S288c) GN=POB3 PE=1 SV=1	1	1	3	3	7	6.93127	2.81462	23.6624	10.7072	5.7958e-06	1.70659e-05	4.6103	0.983028	1	1	MUT - Control	limma	5.7958e-06	1.70659e-05	TRUE	enriched hit	6.93127
CYT1	P07143	Cytochrome c1, heme protein, mitochondrial OS=Saccharomyces cerevisiae (strain ATCC 204508 / S288c) GN=CYT1 PE=1 SV=1	1	1	3	3	3	6.46615	2.57635	22.294	10.6981	5.83248e-06	1.70659e-05	4.60375	0.983043	1	1	MUT - Control	limma	5.83248e-06	1.70659e-05	TRUE	enriched hit	6.46615
UBP3	Q01477	Ubiquitin carboxyl-terminal hydrolase 3 OS=Saccharomyces cerevisiae (strain ATCC 204508 / S288c) GN=UBP3 PE=1 SV=1	1	1	3	3	3	5.63702	2.76834	21.3575	10.6946	5.84646e-06	1.70659e-05	4.60126	0.983048	1	1	MUT - Control	limma	5.84646e-06	1.70659e-05	TRUE	enriched hit	5.63702
DHH1	P39517	ATP-dependent RNA helicase DHH1 OS=Saccharomyces cerevisiae (strain ATCC 204508 / S288c) GN=DHH1 PE=1 SV=1	1	1	3	3	2	6.18146	2.78592	21.0563	10.6907	5.86214e-06	1.70659e-05	4.59848	0.983054	1	1	MUT - Control	limma	5.86214e-06	1.70659e-05	TRUE	enriched hit	6.18146
RPS31	P05759	Ubiquitin-40S ribosomal protein S31 OS=Saccharomyces cerevisiae (strain ATCC 204508 / S288c) GN=RPS31 PE=1 SV=3	1	1	3	3	8	7.3964	2.21335	24.5082	10.6905	5.86294e-06	1.70659e-05	4.59833	0.983055	1	1	MUT - Control	limma	5.86294e-06	1.70659e-05	TRUE	enriched hit	7.3964
PAT1	P25644	DNA topoisomerase 2-associated protein PAT1 OS=Saccharomyces cerevisiae (strain ATCC 204508 / S288c) GN=PAT1 PE=1 SV=4	1	1	3	3	3	6.04895	2.89683	21.1854	10.6897	5.86638e-06	1.70659e-05	4.59772	0.983056	1	1	MUT - Control	limma	5.86638e-06	1.70659e-05	TRUE	enriched hit	6.04895
LSC1	P53598	Succinyl-CoA ligase [ADP-forming] subunit alpha, mitochondrial OS=Saccharomyces cerevisiae (strain ATCC 204508 / S288c) GN=LSC1 PE=1 SV=1	1	1	3	3	2	6.3732	2.01368	22.3771	10.6859	5.88166e-06	1.70659e-05	4.59502	0.983062	1	1	MUT - Control	limma	5.88166e-06	1.70659e-05	TRUE	enriched hit	6.3732
RPN1	P38764	26S proteasome regulatory subunit RPN1 OS=Saccharomyces cerevisiae (strain ATCC 204508 / S288c) GN=RPN1 PE=1 SV=3	1	1	3	3	4	5.72456	2.3646	21.7469	10.6837	5.89099e-06	1.70659e-05	4.59337	0.983066	1	1	MUT - Control	limma	5.89099e-06	1.70659e-05	TRUE	enriched hit	5.72456
BRN1	P38170	Condensin complex subunit 2 OS=Saccharomyces cerevisiae (strain ATCC 204508 / S288c) GN=BRN1 PE=1 SV=3	1	1	3	3	6	5.84866	2.23052	22.4918	10.675	5.92666e-06	1.70933e-05	4.5871	0.98308	1	1	MUT - Control	limma	5.92666e-06	1.70933e-05	TRUE	enriched hit	5.84866
VPS1	P21576	Vacuolar protein sorting-associated protein 1 OS=Saccharomyces cerevisiae (strain ATCC 204508 / S288c) GN=VPS1 PE=1 SV=2	1	1	3	3	15	6.78705	2.4111	24.6333	10.6668	5.96026e-06	1.70933e-05	4.58122	0.983092	1	1	MUT - Control	limma	5.96026e-06	1.70933e-05	TRUE	enriched hit	6.78705
MCK1	P21965	Protein kinase MCK1 OS=Saccharomyces cerevisiae (strain ATCC 204508 / S288c) GN=MCK1 PE=1 SV=1	1	1	3	3	2	6.20975	2.59284	21.2421	10.6649	5.96803e-06	1.70933e-05	4.57987	0.983095	1	1	MUT - Control	limma	5.96803e-06	1.70933e-05	TRUE	enriched hit	6.20975
NOP7	P53261	Pescadillo homolog OS=Saccharomyces cerevisiae (strain ATCC 204508 / S288c) GN=NOP7 PE=1 SV=1	1	1	3	3	5	6.47535	2.84378	22.9311	10.6437	6.0567e-06	1.72821e-05	4.56453	0.983129	1	1	MUT - Control	limma	6.0567e-06	1.72821e-05	TRUE	enriched hit	6.47535
PGI1	P12709	Glucose-6-phosphate isomerase OS=Saccharomyces cerevisiae (strain ATCC 204508 / S288c) GN=PGI1 PE=1 SV=3	1	1	3	3	6	6.69725	2.78654	24.1432	10.6363	6.08782e-06	1.73058e-05	4.5592	0.983141	1	1	MUT - Control	limma	6.08782e-06	1.73058e-05	TRUE	enriched hit	6.69725
RRN5	Q02983	RNA polymerase I-specific transcription initiation factor RRN5 OS=Saccharomyces cerevisiae (strain ATCC 204508 / S288c) GN=RRN5 PE=1 SV=1	1	1	3	3	2	6.22381	2.41084	21.0876	10.6227	6.14584e-06	1.74056e-05	4.54934	0.983162	1	1	MUT - Control	limma	6.14584e-06	1.74056e-05	TRUE	enriched hit	6.22381
MLH1	P38920	DNA mismatch repair protein MLH1 OS=Saccharomyces cerevisiae (strain ATCC 204508 / S288c) GN=MLH1 PE=1 SV=2	1	1	3	3	2	5.40663	2.38747	19.8646	10.6196	1.65194e-05	3.29888e-05	3.70265	0.983167	1	1	MUT - Control	limma	1.65194e-05	3.29888e-05	TRUE	enriched hit	5.40663
OSM1	P21375	Fumarate reductase 2 OS=Saccharomyces cerevisiae (strain ATCC 204508 / S288c) GN=OSM1 PE=1 SV=3	1	1	3	3	2	5.61045	2.24497	20.5489	10.5744	6.35667e-06	1.79146e-05	4.51424	0.983239	1	1	MUT - Control	limma	6.35667e-06	1.79146e-05	TRUE	enriched hit	5.61045
RPS4A|RPS4B	P0CX35|P0CX36	40S ribosomal protein S4-A OS=Saccharomyces cerevisiae (strain ATCC 204508 / S288c) GN=RPS4A PE=1 SV=1|40S ribosomal protein S4-B OS=Saccharomyces cerevisiae (strain ATCC 204508 / S288c) GN=RPS4B PE=1 SV=1	1	1	3	3	15	8.13966	3.40481	26.7579	10.5708	6.37279e-06	1.79146e-05	4.5116	0.983245	1	1	MUT - Control	limma	6.37279e-06	1.79146e-05	TRUE	enriched hit	8.13966
YAT1	P80235	Putative mitochondrial carnitine O-acetyltransferase OS=Saccharomyces cerevisiae (strain ATCC 204508 / S288c) GN=YAT1 PE=1 SV=2	1	1	3	3	5	6.62087	3.06943	23.2782	10.5609	6.41707e-06	1.79725e-05	4.5044	0.98326	1	1	MUT - Control	limma	6.41707e-06	1.79725e-05	TRUE	enriched hit	6.62087
RPN3	P40016	26S proteasome regulatory subunit RPN3 OS=Saccharomyces cerevisiae (strain ATCC 204508 / S288c) GN=RPN3 PE=1 SV=5	1	1	3	3	2	5.9557	2.49231	20.9951	10.5536	6.45001e-06	1.79984e-05	4.49907	0.983272	1	1	MUT - Control	limma	6.45001e-06	1.79984e-05	TRUE	enriched hit	5.9557
SPS19	P32573	Peroxisomal 2,4-dienoyl-CoA reductase SPS19 OS=Saccharomyces cerevisiae (strain ATCC 204508 / S288c) GN=SPS19 PE=1 SV=4	1	1	3	3	2	5.91792	2.87711	20.747	10.5445	6.49144e-06	1.80456e-05	4.4924	0.983286	1	1	MUT - Control	limma	6.49144e-06	1.80456e-05	TRUE	enriched hit	5.91792
RPS23A|RPS23B	P0CX29|P0CX30	40S ribosomal protein S23-A OS=Saccharomyces cerevisiae (strain ATCC 204508 / S288c) GN=RPS23A PE=1 SV=1|40S ribosomal protein S23-B OS=Saccharomyces cerevisiae (strain ATCC 204508 / S288c) GN=RPS23B PE=1 SV=1	1	1	3	3	7	7.83702	3.7419	25.1295	10.5394	6.5145e-06	1.80456e-05	4.48871	0.983294	1	1	MUT - Control	limma	6.5145e-06	1.80456e-05	TRUE	enriched hit	7.83702
RFC3	P38629	Replication factor C subunit 3 OS=Saccharomyces cerevisiae (strain ATCC 204508 / S288c) GN=RFC3 PE=1 SV=1	1	1	3	3	3	5.51521	2.47269	20.8434	10.5207	6.6005e-06	1.82174e-05	4.47506	0.983324	1	1	MUT - Control	limma	6.6005e-06	1.82174e-05	TRUE	enriched hit	5.51521
SEC26	P41810	Coatomer subunit beta OS=Saccharomyces cerevisiae (strain ATCC 204508 / S288c) GN=SEC26 PE=1 SV=2	1	1	3	3	2	5.68248	2.03292	20.1125	10.5031	6.6827e-06	1.83774e-05	4.46217	0.983352	1	1	MUT - Control	limma	6.6827e-06	1.83774e-05	TRUE	enriched hit	5.68248
MYO3	P36006	Myosin-3 OS=Saccharomyces cerevisiae (strain ATCC 204508 / S288c) GN=MYO3 PE=1 SV=4	1	1	3	3	4	6.0429	3.00559	22.2393	10.4935	6.72846e-06	1.84365e-05	4.45506	0.983367	1	1	MUT - Control	limma	6.72846e-06	1.84365e-05	TRUE	enriched hit	6.0429
ZIP1	P31111	Synaptonemal complex protein ZIP1 OS=Saccharomyces cerevisiae (strain ATCC 204508 / S288c) GN=ZIP1 PE=1 SV=2	1	1	3	3	24	7.01499	3.27178	25.6796	10.4789	6.79787e-06	1.85596e-05	4.44437	0.98339	1	1	MUT - Control	limma	6.79787e-06	1.85596e-05	TRUE	enriched hit	7.01499
SEC24	P40482	Protein transport protein SEC24 OS=Saccharomyces cerevisiae (strain ATCC 204508 / S288c) GN=SEC24 PE=1 SV=1	1	1	3	3	3	5.72604	2.59025	21.0517	10.4393	6.99093e-06	1.90183e-05	4.41518	0.983453	1	1	MUT - Control	limma	6.99093e-06	1.90183e-05	TRUE	enriched hit	5.72604
TPS1	Q00764	Alpha,alpha-trehalose-phosphate synthase [UDP-forming] 56 kDa subunit OS=Saccharomyces cerevisiae (strain ATCC 204508 / S288c) GN=TPS1 PE=1 SV=2	1	1	3	3	3	6.35203	2.12349	22.1273	10.4297	7.03846e-06	1.90621e-05	4.40812	0.983468	1	1	MUT - Control	limma	7.03846e-06	1.90621e-05	TRUE	enriched hit	6.35203
YNL181W	P53878	Uncharacterized oxidoreductase YNL181W OS=Saccharomyces cerevisiae (strain ATCC 204508 / S288c) GN=YNL181W PE=1 SV=2	1	1	3	3	2	6.4275	1.98587	20.5566	10.4258	7.05763e-06	1.90621e-05	4.40529	0.983474	1	1	MUT - Control	limma	7.05763e-06	1.90621e-05	TRUE	enriched hit	6.4275
ABF1	P14164	ARS-binding factor 1 OS=Saccharomyces cerevisiae (strain ATCC 204508 / S288c) GN=ABF1 PE=1 SV=4	1	1	3	3	7	6.64329	2.14079	23.6421	10.4209	7.08235e-06	1.90621e-05	4.40164	0.983482	1	1	MUT - Control	limma	7.08235e-06	1.90621e-05	TRUE	enriched hit	6.64329
RNR4	P49723	Ribonucleoside-diphosphate reductase small chain 2 OS=Saccharomyces cerevisiae (strain ATCC 204508 / S288c) GN=RNR4 PE=1 SV=1	1	1	3	3	2	5.60883	2.04592	20.6842	10.4069	7.15321e-06	1.91848e-05	4.39126	0.983504	1	1	MUT - Control	limma	7.15321e-06	1.91848e-05	TRUE	enriched hit	5.60883
IES2	P40154	Ino eighty subunit 2 OS=Saccharomyces cerevisiae (strain ATCC 204508 / S288c) GN=IES2 PE=1 SV=1	1	1	3	3	2	5.72904	1.91537	21.0915	10.399	7.19352e-06	1.92249e-05	4.3854	0.983517	1	1	MUT - Control	limma	7.19352e-06	1.92249e-05	TRUE	enriched hit	5.72904
FPR3	P38911	FK506-binding nuclear protein OS=Saccharomyces cerevisiae (strain ATCC 204508 / S288c) GN=FPR3 PE=1 SV=2	1	1	3	3	3	6.23513	3.48741	23.3542	10.3824	7.27886e-06	1.93589e-05	4.3731	0.983543	1	1	MUT - Control	limma	7.27886e-06	1.93589e-05	TRUE	enriched hit	6.23513
SHS1	Q07657	Seventh homolog of septin 1 OS=Saccharomyces cerevisiae (strain ATCC 204508 / S288c) GN=SHS1 PE=1 SV=1	1	1	3	3	2	5.76927	2.13483	21.3035	10.3771	7.30588e-06	1.93589e-05	4.36924	0.983551	1	1	MUT - Control	limma	7.30588e-06	1.93589e-05	TRUE	enriched hit	5.76927
SLI15	P38283	Inner centromere protein-related protein SLI15 OS=Saccharomyces cerevisiae (strain ATCC 204508 / S288c) GN=SLI15 PE=1 SV=1	1	1	3	3	2	6.06142	2.12778	21.5627	10.3696	7.34497e-06	1.93589e-05	4.36367	0.983563	1	1	MUT - Control	limma	7.34497e-06	1.93589e-05	TRUE	enriched hit	6.06142
ACC1	Q00955	Acetyl-CoA carboxylase OS=Saccharomyces cerevisiae (strain ATCC 204508 / S288c) GN=ACC1 PE=1 SV=2	1	1	3	3	5	6.06967	2.23994	22.6161	10.368	7.35351e-06	1.93589e-05	4.36246	0.983566	1	1	MUT - Control	limma	7.35351e-06	1.93589e-05	TRUE	enriched hit	6.06967
RPL4A	P10664	60S ribosomal protein L4-A OS=Saccharomyces cerevisiae (strain ATCC 204508 / S288c) GN=RPL4A PE=1 SV=4	1	1	3	3	10	8.14041	3.24379	25.4412	10.3646	7.37118e-06	1.93589e-05	4.35996	0.983571	1	1	MUT - Control	limma	7.37118e-06	1.93589e-05	TRUE	enriched hit	8.14041
ADE17	P38009	Bifunctional purine biosynthesis protein ADE17 OS=Saccharomyces cerevisiae (strain ATCC 204508 / S288c) GN=ADE17 PE=1 SV=2	1	1	3	3	5	6.30496	2.51205	22.8656	10.3568	7.41242e-06	1.94001e-05	4.35414	0.983584	1	1	MUT - Control	limma	7.41242e-06	1.94001e-05	TRUE	enriched hit	6.30496
TAL1	P15019	Transaldolase OS=Saccharomyces cerevisiae (strain ATCC 204508 / S288c) GN=TAL1 PE=1 SV=4	1	1	3	3	4	6.16432	2.2442	22.7872	10.3459	7.47023e-06	1.94842e-05	4.34603	0.983601	1	1	MUT - Control	limma	7.47023e-06	1.94842e-05	TRUE	enriched hit	6.16432
RPL21A|RPL21B	Q02753|Q12672	60S ribosomal protein L21-A OS=Saccharomyces cerevisiae (strain ATCC 204508 / S288c) GN=RPL21A PE=1 SV=1|60S ribosomal protein L21-B OS=Saccharomyces cerevisiae (strain ATCC 204508 / S288c) GN=RPL21B PE=1 SV=1	1	1	3	3	6	7.5474	3.15118	25.2438	10.3405	7.499e-06	1.94923e-05	4.34202	0.98361	1	1	MUT - Control	limma	7.499e-06	1.94923e-05	TRUE	enriched hit	7.5474
FRA1	Q07825	Putative Xaa-Pro aminopeptidase FRA1 OS=Saccharomyces cerevisiae (strain ATCC 204508 / S288c) GN=FRA1 PE=1 SV=1	1	1	3	3	4	6.39722	1.99767	22.9488	10.328	7.56651e-06	1.95703e-05	4.33267	0.983629	1	1	MUT - Control	limma	7.56651e-06	1.95703e-05	TRUE	enriched hit	6.39722
MET6	P05694	5-methyltetrahydropteroyltriglutamate--homocysteine methyltransferase OS=Saccharomyces cerevisiae (strain ATCC 204508 / S288c) GN=MET6 PE=1 SV=4	1	1	3	3	3	5.60382	2.24103	21.3124	10.3226	7.59548e-06	1.95703e-05	4.32868	0.983638	1	1	MUT - Control	limma	7.59548e-06	1.95703e-05	TRUE	enriched hit	5.60382
IOC3	P43596	ISWI one complex protein 3 OS=Saccharomyces cerevisiae (strain ATCC 204508 / S288c) GN=IOC3 PE=1 SV=1	1	1	3	3	2	6.83588	2.64775	21.0802	10.3135	7.64536e-06	1.95703e-05	4.32185	0.983652	1	1	MUT - Control	limma	7.64536e-06	1.95703e-05	TRUE	enriched hit	6.83588
RPL27A|RPL27B	P0C2H6|P0C2H7	60S ribosomal protein L27-A OS=Saccharomyces cerevisiae (strain ATCC 204508 / S288c) GN=RPL27A PE=1 SV=1|60S ribosomal protein L27-B OS=Saccharomyces cerevisiae (strain ATCC 204508 / S288c) GN=RPL27B PE=1 SV=1	1	1	3	3	5	7.39931	3.457	24.4895	10.3135	7.64538e-06	1.95703e-05	4.32185	0.983652	1	1	MUT - Control	limma	7.64538e-06	1.95703e-05	TRUE	enriched hit	7.39931
GTS1	P40956	Protein GTS1 OS=Saccharomyces cerevisiae (strain ATCC 204508 / S288c) GN=GTS1 PE=1 SV=2	1	1	3	3	2	5.64607	2.07376	20.9076	10.3053	7.69016e-06	1.95703e-05	4.31575	0.983665	1	1	MUT - Control	limma	7.69016e-06	1.95703e-05	TRUE	enriched hit	5.64607
YGR169C-A	Q3E772	Uncharacterized protein YGR169C-A OS=Saccharomyces cerevisiae (strain ATCC 204508 / S288c) GN=YGR169C-A PE=4 SV=1	1	1	3	3	4	6.23304	3.37209	23.0441	10.3034	7.70085e-06	1.95703e-05	4.3143	0.983668	1	1	MUT - Control	limma	7.70085e-06	1.95703e-05	TRUE	enriched hit	6.23304
NDI1	P32340	Rotenone-insensitive NADH-ubiquinone oxidoreductase, mitochondrial OS=Saccharomyces cerevisiae (strain ATCC 204508 / S288c) GN=NDI1 PE=1 SV=1	1	1	3	3	3	6.58282	2.91152	23.8704	10.3018	7.70952e-06	1.95703e-05	4.31313	0.983671	1	1	MUT - Control	limma	7.70952e-06	1.95703e-05	TRUE	enriched hit	6.58282
ABF2	Q02486	ARS-binding factor 2, mitochondrial OS=Saccharomyces cerevisiae (strain ATCC 204508 / S288c) GN=ABF2 PE=1 SV=1	1	1	3	3	8	7.47865	2.16435	24.5179	10.2732	7.86885e-06	1.99082e-05	4.29177	0.983716	1	1	MUT - Control	limma	7.86885e-06	1.99082e-05	TRUE	enriched hit	7.47865
SDH2	P21801	Succinate dehydrogenase [ubiquinone] iron-sulfur subunit, mitochondrial OS=Saccharomyces cerevisiae (strain ATCC 204508 / S288c) GN=SDH2 PE=1 SV=1	1	1	3	3	5	6.37807	2.45058	22.4874	10.2606	7.94084e-06	1.99928e-05	4.28226	0.983736	1	1	MUT - Control	limma	7.94084e-06	1.99928e-05	TRUE	enriched hit	6.37807
UBP7	P40453	Ubiquitin carboxyl-terminal hydrolase 7 OS=Saccharomyces cerevisiae (strain ATCC 204508 / S288c) GN=UBP7 PE=1 SV=1	1	1	3	3	3	5.74179	2.2064	21.489	10.2581	7.95498e-06	1.99928e-05	4.28041	0.98374	1	1	MUT - Control	limma	7.95498e-06	1.99928e-05	TRUE	enriched hit	5.74179
CAD1	P24813	AP-1-like transcription activator YAP2 OS=Saccharomyces cerevisiae (strain ATCC 204508 / S288c) GN=CAD1 PE=1 SV=2	1	1	3	3	3	5.69242	2.69563	21.647	10.25	8.00109e-06	2.00423e-05	4.27437	0.983753	1	1	MUT - Control	limma	8.00109e-06	2.00423e-05	TRUE	enriched hit	5.69242
PDE2	P06776	3',5'-cyclic-nucleotide phosphodiesterase 2 OS=Saccharomyces cerevisiae (strain ATCC 204508 / S288c) GN=PDE2 PE=1 SV=2	1	1	3	3	2	5.94746	2.41339	20.39	10.2451	8.02954e-06	2.00474e-05	4.27066	0.983761	1	1	MUT - Control	limma	8.02954e-06	2.00474e-05	TRUE	enriched hit	5.94746
ARE2	P53629	Sterol O-acyltransferase 2 OS=Saccharomyces cerevisiae (strain ATCC 204508 / S288c) GN=ARE2 PE=1 SV=1	1	1	3	3	2	5.83183	2.02322	20.9444	10.2393	8.06294e-06	2.00648e-05	4.26633	0.98377	1	1	MUT - Control	limma	8.06294e-06	2.00648e-05	TRUE	enriched hit	5.83183
TMA64	Q04600	Translation machinery-associated protein 64 OS=Saccharomyces cerevisiae (strain ATCC 204508 / S288c) GN=TMA64 PE=1 SV=1	1	1	3	3	3	5.88874	2.01449	22.1006	10.2084	8.24475e-06	2.04502e-05	4.24303	0.983819	1	1	MUT - Control	limma	8.24475e-06	2.04502e-05	TRUE	enriched hit	5.88874
FBP1	P09201	Fructose-1,6-bisphosphatase OS=Saccharomyces cerevisiae (strain ATCC 204508 / S288c) GN=FBP1 PE=1 SV=2	1	1	3	3	6	6.21667	2.55658	22.939	10.1593	8.54285e-06	2.11206e-05	4.20591	0.983897	1	1	MUT - Control	limma	8.54285e-06	2.11206e-05	TRUE	enriched hit	6.21667
RPL6B	P05739	60S ribosomal protein L6-B OS=Saccharomyces cerevisiae (strain ATCC 204508 / S288c) GN=RPL6B PE=1 SV=4	1	1	3	3	5	6.82534	3.01193	22.5046	10.1486	8.60961e-06	2.12088e-05	4.19777	0.983914	1	1	MUT - Control	limma	8.60961e-06	2.12088e-05	TRUE	enriched hit	6.82534
NHP6A	P11632	Non-histone chromosomal protein 6A OS=Saccharomyces cerevisiae (strain ATCC 204508 / S288c) GN=NHP6A PE=1 SV=1	1	1	3	3	4	7.35182	2.54929	22.7921	10.1446	8.63441e-06	2.12088e-05	4.19476	0.98392	1	1	MUT - Control	limma	8.63441e-06	2.12088e-05	TRUE	enriched hit	7.35182
ALA1	P40825|P40825-2	Alanine--tRNA ligase, mitochondrial OS=Saccharomyces cerevisiae (strain ATCC 204508 / S288c) GN=ALA1 PE=1 SV=3|Isoform Cytoplasmic of Alanine--tRNA ligase, mitochondrial OS=Saccharomyces cerevisiae (strain ATCC 204508 / S288c) GN=ALA1	1	1	3	3	7	6.03919	2.0067	22.8757	10.1322	8.71223e-06	2.13309e-05	4.18538	0.98394	1	1	MUT - Control	limma	8.71223e-06	2.13309e-05	TRUE	enriched hit	6.03919
SMC4	Q12267	Structural maintenance of chromosomes protein 4 OS=Saccharomyces cerevisiae (strain ATCC 204508 / S288c) GN=SMC4 PE=1 SV=1	1	1	3	3	8	6.18063	1.88501	23.42	10.1156	8.81816e-06	2.15208e-05	4.17274	0.983966	1	1	MUT - Control	limma	8.81816e-06	2.15208e-05	TRUE	enriched hit	6.18063
MRM1	P25270	rRNA methyltransferase 1, mitochondrial OS=Saccharomyces cerevisiae (strain ATCC 204508 / S288c) GN=MRM1 PE=1 SV=2	1	1	3	3	3	5.71654	2.64584	21.946	10.0955	8.94821e-06	2.1763e-05	4.15743	0.983998	1	1	MUT - Control	limma	8.94821e-06	2.1763e-05	TRUE	enriched hit	5.71654
MRPL16	P38064	54S ribosomal protein L16, mitochondrial OS=Saccharomyces cerevisiae (strain ATCC 204508 / S288c) GN=MRPL16 PE=1 SV=1	1	1	3	3	4	6.47882	3.21619	22.4884	10.0914	8.97473e-06	2.1763e-05	4.15433	0.984004	1	1	MUT - Control	limma	8.97473e-06	2.1763e-05	TRUE	enriched hit	6.47882
SEC61	P32915	Protein transport protein SEC61 OS=Saccharomyces cerevisiae (strain ATCC 204508 / S288c) GN=SEC61 PE=1 SV=1	1	1	3	3	4	6.12696	2.52972	22.5501	10.087	9.00362e-06	2.17635e-05	4.15097	0.984011	1	1	MUT - Control	limma	9.00362e-06	2.17635e-05	TRUE	enriched hit	6.12696
APE2	P32454	Aminopeptidase 2, mitochondrial OS=Saccharomyces cerevisiae (strain ATCC 204508 / S288c) GN=APE2 PE=1 SV=4	1	1	3	3	2	5.69641	2.82965	20.6594	10.0654	9.147e-06	2.20082e-05	4.13444	0.984046	1	1	MUT - Control	limma	9.147e-06	2.20082e-05	TRUE	enriched hit	5.69641
GRS1	P38088-2	Isoform Cytoplasmic of Glycine--tRNA ligase 1, mitochondrial OS=Saccharomyces cerevisiae (strain ATCC 204508 / S288c) GN=GRS1	1	1	3	3	11	6.53678	2.07003	24.0285	10.063	9.16282e-06	2.20082e-05	4.13263	0.984049	1	1	MUT - Control	limma	9.16282e-06	2.20082e-05	TRUE	enriched hit	6.53678
GLN1	P32288	Glutamine synthetase OS=Saccharomyces cerevisiae (strain ATCC 204508 / S288c) GN=GLN1 PE=1 SV=4	1	1	3	3	3	6.18833	2.15126	21.8011	10.0487	9.25948e-06	2.2009e-05	4.12165	0.984072	1	1	MUT - Control	limma	9.25948e-06	2.2009e-05	TRUE	enriched hit	6.18833
BDF1	P35817	Bromodomain-containing factor 1 OS=Saccharomyces cerevisiae (strain ATCC 204508 / S288c) GN=BDF1 PE=1 SV=3	1	1	3	3	6	5.91174	2.03911	22.7384	10.048	9.26424e-06	2.2009e-05	4.12111	0.984073	1	1	MUT - Control	limma	9.26424e-06	2.2009e-05	TRUE	enriched hit	5.91174
PHO2	P07269	Regulatory protein PHO2 OS=Saccharomyces cerevisiae (strain ATCC 204508 / S288c) GN=PHO2 PE=1 SV=1	1	1	3	3	3	5.68498	2.53656	20.6416	10.0462	9.27619e-06	2.2009e-05	4.11976	0.984076	1	1	MUT - Control	limma	9.27619e-06	2.2009e-05	TRUE	enriched hit	5.68498
YGL108C	P53139	Uncharacterized protein YGL108C OS=Saccharomyces cerevisiae (strain ATCC 204508 / S288c) GN=YGL108C PE=1 SV=1	1	1	3	3	2	5.94007	2.31324	21.541	10.0458	9.27916e-06	2.2009e-05	4.11943	0.984077	1	1	MUT - Control	limma	9.27916e-06	2.2009e-05	TRUE	enriched hit	5.94007
JHD1	P40034	JmjC domain-containing histone demethylation protein 1 OS=Saccharomyces cerevisiae (strain ATCC 204508 / S288c) GN=JHD1 PE=1 SV=1	1	1	3	3	3	5.66936	2.02878	20.8288	10.0343	9.35713e-06	2.21248e-05	4.11067	0.984095	1	1	MUT - Control	limma	9.35713e-06	2.21248e-05	TRUE	enriched hit	5.66936
RSA4	P25382	Ribosome assembly protein 4 OS=Saccharomyces cerevisiae (strain ATCC 204508 / S288c) GN=RSA4 PE=1 SV=3	1	1	3	3	2	5.84765	2.7811	21.4407	10.0214	9.44626e-06	2.22662e-05	4.10075	0.984115	1	1	MUT - Control	limma	9.44626e-06	2.22662e-05	TRUE	enriched hit	5.84765
MSD1	P15179	Aspartate--tRNA ligase, mitochondrial OS=Saccharomyces cerevisiae (strain ATCC 204508 / S288c) GN=MSD1 PE=1 SV=1	1	1	3	3	4	5.80819	2.35213	21.6765	10.0104	9.52314e-06	2.23699e-05	4.09226	0.984133	1	1	MUT - Control	limma	9.52314e-06	2.23699e-05	TRUE	enriched hit	5.80819
PRS1	P32895	Ribose-phosphate pyrophosphokinase 1 OS=Saccharomyces cerevisiae (strain ATCC 204508 / S288c) GN=PRS1 PE=1 SV=1	1	1	3	3	4	5.77004	2.71866	20.9924	10.0066	9.54922e-06	2.23699e-05	4.0894	0.984139	1	1	MUT - Control	limma	9.54922e-06	2.23699e-05	TRUE	enriched hit	5.77004
TFC1	P32367	Transcription factor tau 95 kDa subunit OS=Saccharomyces cerevisiae (strain ATCC 204508 / S288c) GN=TFC1 PE=1 SV=1	1	1	3	3	4	6.03762	2.9761	22.1001	9.98253	9.71988e-06	2.26997e-05	4.07085	0.984177	1	1	MUT - Control	limma	9.71988e-06	2.26997e-05	TRUE	enriched hit	6.03762
GLO3	P38682	ADP-ribosylation factor GTPase-activating protein GLO3 OS=Saccharomyces cerevisiae (strain ATCC 204508 / S288c) GN=GLO3 PE=1 SV=1	1	1	3	3	2	6.06857	2.41324	20.2279	9.9771	9.75884e-06	2.27207e-05	4.06666	0.984186	1	1	MUT - Control	limma	9.75884e-06	2.27207e-05	TRUE	enriched hit	6.06857
SEC23	P15303	Protein transport protein SEC23 OS=Saccharomyces cerevisiae (strain ATCC 204508 / S288c) GN=SEC23 PE=1 SV=1	1	1	3	3	4	6.17047	1.89681	22.4979	9.96193	9.86851e-06	2.29058e-05	4.05495	0.98421	1	1	MUT - Control	limma	9.86851e-06	2.29058e-05	TRUE	enriched hit	6.17047
SCL1	P21243	Proteasome subunit alpha type-1 OS=Saccharomyces cerevisiae (strain ATCC 204508 / S288c) GN=SCL1 PE=1 SV=1	1	1	3	3	3	5.81822	1.85702	20.9576	9.9218	1.01653e-05	2.35228e-05	4.0239	0.984273	1	1	MUT - Control	limma	1.01653e-05	2.35228e-05	TRUE	enriched hit	5.81822
SPO14	P36126	Phospholipase D1 OS=Saccharomyces cerevisiae (strain ATCC 204508 / S288c) GN=SPO14 PE=1 SV=3	1	1	3	3	5	6.25363	2.83781	22.915	9.91579	1.02107e-05	2.35559e-05	4.01924	0.984283	1	1	MUT - Control	limma	1.02107e-05	2.35559e-05	TRUE	enriched hit	6.25363
ADE5,7	P07244	Bifunctional purine biosynthetic protein ADE5,7 OS=Saccharomyces cerevisiae (strain ATCC 204508 / S288c) GN=ADE5,7 PE=1 SV=1	1	1	3	3	5	5.98005	2.04498	22.8413	9.91145	1.02435e-05	2.356e-05	4.01587	0.98429	1	1	MUT - Control	limma	1.02435e-05	2.356e-05	TRUE	enriched hit	5.98005
TUB2	P02557	Tubulin beta chain OS=Saccharomyces cerevisiae (strain ATCC 204508 / S288c) GN=TUB2 PE=1 SV=2	1	1	3	3	3	6.34867	2.12436	23.1081	9.89677	1.03555e-05	2.37044e-05	4.00447	0.984313	1	1	MUT - Control	limma	1.03555e-05	2.37044e-05	TRUE	enriched hit	6.34867
NGG1	P32494	Chromatin-remodeling complexes subunit NGG1 OS=Saccharomyces cerevisiae (strain ATCC 204508 / S288c) GN=NGG1 PE=1 SV=1	1	1	3	3	3	5.72702	2.46127	21.252	9.89127	1.03978e-05	2.37044e-05	4.0002	0.984322	1	1	MUT - Control	limma	1.03978e-05	2.37044e-05	TRUE	enriched hit	5.72702
CRM1	P30822	Exportin-1 OS=Saccharomyces cerevisiae (strain ATCC 204508 / S288c) GN=CRM1 PE=1 SV=1	1	1	3	3	3	5.60476	2.10552	21.1857	9.891	1.03999e-05	2.37044e-05	3.99999	0.984322	1	1	MUT - Control	limma	1.03999e-05	2.37044e-05	TRUE	enriched hit	5.60476
ARO9	P38840	Aromatic amino acid aminotransferase 2 OS=Saccharomyces cerevisiae (strain ATCC 204508 / S288c) GN=ARO9 PE=1 SV=3	1	1	3	3	5	6.60485	2.11465	22.4945	9.87199	1.05478e-05	2.39352e-05	3.98519	0.984352	1	1	MUT - Control	limma	1.05478e-05	2.39352e-05	TRUE	enriched hit	6.60485
STH1	P32597	Nuclear protein STH1/NPS1 OS=Saccharomyces cerevisiae (strain ATCC 204508 / S288c) GN=STH1 PE=1 SV=1	1	1	3	3	9	6.07902	1.77277	23.3603	9.86988	1.05643e-05	2.39352e-05	3.98355	0.984355	1	1	MUT - Control	limma	1.05643e-05	2.39352e-05	TRUE	enriched hit	6.07902
NOP56	Q12460	Nucleolar protein 56 OS=Saccharomyces cerevisiae (strain ATCC 204508 / S288c) GN=NOP56 PE=1 SV=1	1	1	3	3	7	6.95893	2.43471	23.6269	9.86425	1.06086e-05	2.3964e-05	3.97916	0.984364	1	1	MUT - Control	limma	1.06086e-05	2.3964e-05	TRUE	enriched hit	6.95893
SSD1	P24276	Protein SSD1 OS=Saccharomyces cerevisiae (strain ATCC 204508 / S288c) GN=SSD1 PE=1 SV=1	1	1	3	3	2	5.49938	3.66395	19.7517	9.84781	1.07391e-05	2.41869e-05	3.96634	0.98439	1	1	MUT - Control	limma	1.07391e-05	2.41869e-05	TRUE	enriched hit	5.49938
HCR1	Q05775	Eukaryotic translation initiation factor 3 subunit J OS=Saccharomyces cerevisiae (strain ATCC 204508 / S288c) GN=HCR1 PE=1 SV=1	1	1	3	3	6	6.90602	2.30369	24.263	9.80417	1.10946e-05	2.49135e-05	3.93218	0.98446	1	1	MUT - Control	limma	1.10946e-05	2.49135e-05	TRUE	enriched hit	6.90602
NUP145	P49687	Nucleoporin NUP145 OS=Saccharomyces cerevisiae (strain ATCC 204508 / S288c) GN=NUP145 PE=1 SV=1	1	1	3	3	2	5.88873	1.96548	20.1241	9.79117	1.12029e-05	2.50826e-05	3.92198	0.98448	1	1	MUT - Control	limma	1.12029e-05	2.50826e-05	TRUE	enriched hit	5.88873
IMD4	P50094	Inosine-5'-monophosphate dehydrogenase 4 OS=Saccharomyces cerevisiae (strain ATCC 204508 / S288c) GN=IMD4 PE=1 SV=1	1	1	3	3	3	6.03276	2.67954	21.0601	9.78378	1.12651e-05	2.51476e-05	3.91617	0.984492	1	1	MUT - Control	limma	1.12651e-05	2.51476e-05	TRUE	enriched hit	6.03276
ERG27	Q12452	3-keto-steroid reductase OS=Saccharomyces cerevisiae (strain ATCC 204508 / S288c) GN=ERG27 PE=1 SV=1	1	1	3	3	3	6.04318	1.85777	21.9014	9.77582	1.13324e-05	2.52238e-05	3.90992	0.984505	1	1	MUT - Control	limma	1.13324e-05	2.52238e-05	TRUE	enriched hit	6.04318
CAM1	P29547	Elongation factor 1-gamma 1 OS=Saccharomyces cerevisiae (strain ATCC 204508 / S288c) GN=CAM1 PE=1 SV=2	1	1	3	3	2	5.89286	1.9776	21.0349	9.76884	1.13918e-05	2.52805e-05	3.90443	0.984516	1	1	MUT - Control	limma	1.13918e-05	2.52805e-05	TRUE	enriched hit	5.89286
MSS116	P15424	ATP-dependent RNA helicase MSS116, mitochondrial OS=Saccharomyces cerevisiae (strain ATCC 204508 / S288c) GN=MSS116 PE=1 SV=1	1	1	3	3	14	7.34274	2.90117	24.708	9.76503	1.14245e-05	2.52805e-05	3.90142	0.984522	1	1	MUT - Control	limma	1.14245e-05	2.52805e-05	TRUE	enriched hit	7.34274
SCC2	Q04002	Sister chromatid cohesion protein 2 OS=Saccharomyces cerevisiae (strain ATCC 204508 / S288c) GN=SCC2 PE=1 SV=1	1	1	3	3	7	5.86353	2.44591	22.2007	9.74866	1.15657e-05	2.55185e-05	3.88853	0.984548	1	1	MUT - Control	limma	1.15657e-05	2.55185e-05	TRUE	enriched hit	5.86353
SAH1	P39954	Adenosylhomocysteinase OS=Saccharomyces cerevisiae (strain ATCC 204508 / S288c) GN=SAH1 PE=1 SV=1	1	1	3	3	2	6.00412	2.46694	20.5072	9.73494	1.16856e-05	2.57083e-05	3.8777	0.984569	1	1	MUT - Control	limma	1.16856e-05	2.57083e-05	TRUE	enriched hit	6.00412
SUC2	P00724|P00724-2	Invertase 2 OS=Saccharomyces cerevisiae (strain ATCC 204508 / S288c) GN=SUC2 PE=1 SV=1|Isoform Intracellular of Invertase 2 OS=Saccharomyces cerevisiae (strain ATCC 204508 / S288c) GN=SUC2	1	1	3	3	3	6.10598	2.76361	21.4306	9.72839	1.17433e-05	2.57606e-05	3.87253	0.98458	1	1	MUT - Control	limma	1.17433e-05	2.57606e-05	TRUE	enriched hit	6.10598
YAT2	P40017	Carnitine O-acetyltransferase YAT2 OS=Saccharomyces cerevisiae (strain ATCC 204508 / S288c) GN=YAT2 PE=1 SV=1	1	1	3	3	3	6.29633	2.07287	22.9898	9.69432	1.20487e-05	2.63543e-05	3.84557	0.984634	1	1	MUT - Control	limma	1.20487e-05	2.63543e-05	TRUE	enriched hit	6.29633
ENO1	P00924	Enolase 1 OS=Saccharomyces cerevisiae (strain ATCC 204508 / S288c) GN=ENO1 PE=1 SV=3	1	1	3	3	5	7.11217	2.57237	23.705	9.68588	1.21258e-05	2.64468e-05	3.83887	0.984647	1	1	MUT - Control	limma	1.21258e-05	2.64468e-05	TRUE	enriched hit	7.11217
PMT1	P33775	Dolichyl-phosphate-mannose--protein mannosyltransferase 1 OS=Saccharomyces cerevisiae (strain ATCC 204508 / S288c) GN=PMT1 PE=1 SV=1	1	1	3	3	4	5.72754	2.11252	21.314	9.67828	1.21956e-05	2.64928e-05	3.83284	0.984659	1	1	MUT - Control	limma	1.21956e-05	2.64928e-05	TRUE	enriched hit	5.72754
GPH1	P06738	Glycogen phosphorylase OS=Saccharomyces cerevisiae (strain ATCC 204508 / S288c) GN=GPH1 PE=1 SV=4	1	1	3	3	9	6.71018	1.8225	23.7978	9.67599	1.22167e-05	2.64928e-05	3.83102	0.984663	1	1	MUT - Control	limma	1.22167e-05	2.64928e-05	TRUE	enriched hit	6.71018
UBA1	P22515	Ubiquitin-activating enzyme E1 1 OS=Saccharomyces cerevisiae (strain ATCC 204508 / S288c) GN=UBA1 PE=1 SV=2	1	1	3	3	2	5.83929	2.487	21.2755	9.66306	1.23368e-05	2.6677e-05	3.82074	0.984683	1	1	MUT - Control	limma	1.23368e-05	2.6677e-05	TRUE	enriched hit	5.83929
DST1	P07273	Transcription elongation factor S-II OS=Saccharomyces cerevisiae (strain ATCC 204508 / S288c) GN=DST1 PE=1 SV=4	1	1	3	3	7	6.8048	2.89545	23.7275	9.65255	1.24353e-05	2.68137e-05	3.81239	0.9847	1	1	MUT - Control	limma	1.24353e-05	2.68137e-05	TRUE	enriched hit	6.8048
MVD1	P32377	Diphosphomevalonate decarboxylase OS=Saccharomyces cerevisiae (strain ATCC 204508 / S288c) GN=MVD1 PE=1 SV=2	1	1	3	3	3	5.8448	2.09767	21.4403	9.62638	1.26847e-05	2.72739e-05	3.79152	0.984741	1	1	MUT - Control	limma	1.26847e-05	2.72739e-05	TRUE	enriched hit	5.8448
IDP2	P41939	Isocitrate dehydrogenase [NADP] cytoplasmic OS=Saccharomyces cerevisiae (strain ATCC 204508 / S288c) GN=IDP2 PE=1 SV=2	1	1	3	3	10	6.9711	2.79913	23.7036	9.61607	1.27844e-05	2.74106e-05	3.78329	0.984758	1	1	MUT - Control	limma	1.27844e-05	2.74106e-05	TRUE	enriched hit	6.9711
TIF5	P38431|P38431-2	Eukaryotic translation initiation factor 5 OS=Saccharomyces cerevisiae (strain ATCC 204508 / S288c) GN=TIF5 PE=1 SV=1|Isoform Short of Eukaryotic translation initiation factor 5 OS=Saccharomyces cerevisiae (strain ATCC 204508 / S288c) GN=TIF5	1	1	3	3	5	6.14062	2.14291	21.8832	9.60961	1.28474e-05	2.74568e-05	3.77813	0.984768	1	1	MUT - Control	limma	1.28474e-05	2.74568e-05	TRUE	enriched hit	6.14062
PET127	P32606	Putative mitochondrial translation system component PET127 OS=Saccharomyces cerevisiae (strain ATCC 204508 / S288c) GN=PET127 PE=1 SV=2	1	1	3	3	3	5.61464	1.97698	21.8438	9.60645	1.28783e-05	2.74568e-05	3.7756	0.984773	1	1	MUT - Control	limma	1.28783e-05	2.74568e-05	TRUE	enriched hit	5.61464
ERG20	P08524	Farnesyl pyrophosphate synthase OS=Saccharomyces cerevisiae (strain ATCC 204508 / S288c) GN=ERG20 PE=1 SV=2	1	1	3	3	2	6.05916	2.17292	20.3817	9.5864	1.30764e-05	2.7801e-05	3.75955	0.984805	1	1	MUT - Control	limma	1.30764e-05	2.7801e-05	TRUE	enriched hit	6.05916
CNM67	P53865	Chaotic nuclear migration protein 67 OS=Saccharomyces cerevisiae (strain ATCC 204508 / S288c) GN=CNM67 PE=1 SV=1	1	1	3	3	2	5.94825	2.58525	20.8107	9.57824	1.3158e-05	2.78964e-05	3.75301	0.984818	1	1	MUT - Control	limma	1.3158e-05	2.78964e-05	TRUE	enriched hit	5.94825
APL2	P36000	AP-1 complex subunit beta-1 OS=Saccharomyces cerevisiae (strain ATCC 204508 / S288c) GN=APL2 PE=1 SV=1	1	1	3	3	2	5.57637	2.58912	20.1997	9.57257	1.3215e-05	2.79392e-05	3.74846	0.984827	1	1	MUT - Control	limma	1.3215e-05	2.79392e-05	TRUE	enriched hit	5.57637
SPT5	P27692	Transcription elongation factor SPT5 OS=Saccharomyces cerevisiae (strain ATCC 204508 / S288c) GN=SPT5 PE=1 SV=1	1	1	3	3	18	6.73568	2.39503	24.6807	9.55171	1.34272e-05	2.8309e-05	3.73171	0.98486	1	1	MUT - Control	limma	1.34272e-05	2.8309e-05	TRUE	enriched hit	6.73568
COP1	P53622	Coatomer subunit alpha OS=Saccharomyces cerevisiae (strain ATCC 204508 / S288c) GN=COP1 PE=1 SV=2	1	1	3	3	5	5.94089	1.82015	22.0098	9.5476	1.34694e-05	2.83194e-05	3.72841	0.984866	1	1	MUT - Control	limma	1.34694e-05	2.83194e-05	TRUE	enriched hit	5.94089
MSH1	P25846	DNA mismatch repair protein MSH1, mitochondrial OS=Saccharomyces cerevisiae (strain ATCC 204508 / S288c) GN=MSH1 PE=1 SV=2	1	1	3	3	2	5.46902	2.39733	20.0916	9.53088	1.3643e-05	2.85894e-05	3.71494	0.984893	1	1	MUT - Control	limma	1.3643e-05	2.85894e-05	TRUE	enriched hit	5.46902
RPS14A|RPS14B	P06367|P39516	40S ribosomal protein S14-A OS=Saccharomyces cerevisiae (strain ATCC 204508 / S288c) GN=RPS14A PE=1 SV=5|40S ribosomal protein S14-B OS=Saccharomyces cerevisiae (strain ATCC 204508 / S288c) GN=RPS14B PE=1 SV=2	1	1	3	3	5	7.08439	1.85567	23.1098	9.52799	1.36732e-05	2.85894e-05	3.71261	0.984897	1	1	MUT - Control	limma	1.36732e-05	2.85894e-05	TRUE	enriched hit	7.08439
MRPS28	P21771	37S ribosomal protein S28, mitochondrial OS=Saccharomyces cerevisiae (strain ATCC 204508 / S288c) GN=MRPS28 PE=1 SV=1	1	1	3	3	3	6.52391	2.7314	22.8016	9.51639	1.37953e-05	2.87654e-05	3.70326	0.984916	1	1	MUT - Control	limma	1.37953e-05	2.87654e-05	TRUE	enriched hit	6.52391
RPL2A|RPL2B	P0CX45|P0CX46	60S ribosomal protein L2-A OS=Saccharomyces cerevisiae (strain ATCC 204508 / S288c) GN=RPL2A PE=1 SV=1|60S ribosomal protein L2-B OS=Saccharomyces cerevisiae (strain ATCC 204508 / S288c) GN=RPL2B PE=1 SV=1	1	1	3	3	12	8.11394	4.11536	26.0258	9.50264	1.39416e-05	2.89303e-05	3.69216	0.984937	1	1	MUT - Control	limma	1.39416e-05	2.89303e-05	TRUE	enriched hit	8.11394
LSB3	P43603	LAS seventeen-binding protein 3 OS=Saccharomyces cerevisiae (strain ATCC 204508 / S288c) GN=LSB3 PE=1 SV=3	1	1	3	3	3	6.32255	3.49604	20.5276	9.50005	1.39694e-05	2.89303e-05	3.69006	0.984942	1	1	MUT - Control	limma	1.39694e-05	2.89303e-05	TRUE	enriched hit	6.32255
TFC8	Q12308	Transcription factor tau 60 kDa subunit OS=Saccharomyces cerevisiae (strain ATCC 204508 / S288c) GN=TFC8 PE=1 SV=1	1	1	3	3	3	5.90007	2.60196	21.7975	9.49825	1.39887e-05	2.89303e-05	3.68861	0.984944	1	1	MUT - Control	limma	1.39887e-05	2.89303e-05	TRUE	enriched hit	5.90007
DPS1	P04802	Aspartate--tRNA ligase, cytoplasmic OS=Saccharomyces cerevisiae (strain ATCC 204508 / S288c) GN=DPS1 PE=1 SV=3	1	1	3	3	23	7.08746	2.39509	24.9668	9.48863	1.40925e-05	2.9055e-05	3.68083	0.98496	1	1	MUT - Control	limma	1.40925e-05	2.9055e-05	TRUE	enriched hit	7.08746
TIF4631	P39935	Eukaryotic initiation factor 4F subunit p150 OS=Saccharomyces cerevisiae (strain ATCC 204508 / S288c) GN=TIF4631 PE=1 SV=2	1	1	3	3	3	5.93638	2.21899	21.5178	9.48558	1.41255e-05	2.9055e-05	3.67836	0.984964	1	1	MUT - Control	limma	1.41255e-05	2.9055e-05	TRUE	enriched hit	5.93638
GDB1	Q06625	Glycogen debranching enzyme OS=Saccharomyces cerevisiae (strain ATCC 204508 / S288c) GN=GDB1 PE=1 SV=1	1	1	3	3	2	5.57801	1.71349	21.2337	9.40887	1.4987e-05	3.07436e-05	3.61604	0.985086	1	1	MUT - Control	limma	1.4987e-05	3.07436e-05	TRUE	enriched hit	5.57801
IFM1	P25038	Translation initiation factor IF-2, mitochondrial OS=Saccharomyces cerevisiae (strain ATCC 204508 / S288c) GN=IFM1 PE=1 SV=2	1	1	3	3	4	5.87324	1.79034	21.8517	9.39917	1.51e-05	3.0892e-05	3.60812	0.985101	1	1	MUT - Control	limma	1.51e-05	3.0892e-05	TRUE	enriched hit	5.87324
JIP5	Q06214	WD repeat-containing protein JIP5 OS=Saccharomyces cerevisiae (strain ATCC 204508 / S288c) GN=JIP5 PE=1 SV=2	1	1	3	3	3	5.95993	2.31775	21.5233	9.39539	1.51443e-05	3.08993e-05	3.60504	0.985107	1	1	MUT - Control	limma	1.51443e-05	3.08993e-05	TRUE	enriched hit	5.95993
CFT2	Q12102	Cleavage factor two protein 2 OS=Saccharomyces cerevisiae (strain ATCC 204508 / S288c) GN=CFT2 PE=1 SV=1	1	1	3	3	2	5.47213	1.69887	20.5559	9.37862	1.53427e-05	3.11467e-05	3.59133	0.985134	1	1	MUT - Control	limma	1.53427e-05	3.11467e-05	TRUE	enriched hit	5.47213
YCS4	Q06156	Condensin complex subunit 1 OS=Saccharomyces cerevisiae (strain ATCC 204508 / S288c) GN=YCS4 PE=1 SV=1	1	1	3	3	4	5.62956	2.47931	21.7708	9.3782	1.53476e-05	3.11467e-05	3.59099	0.985135	1	1	MUT - Control	limma	1.53476e-05	3.11467e-05	TRUE	enriched hit	5.62956
YGR266W	P53326	Uncharacterized protein YGR266W OS=Saccharomyces cerevisiae (strain ATCC 204508 / S288c) GN=YGR266W PE=1 SV=1	1	1	3	3	2	5.75293	2.47909	21.2015	9.35685	1.56046e-05	3.15836e-05	3.5735	0.985169	1	1	MUT - Control	limma	1.56046e-05	3.15836e-05	TRUE	enriched hit	5.75293
ADE3	P07245	C-1-tetrahydrofolate synthase, cytoplasmic OS=Saccharomyces cerevisiae (strain ATCC 204508 / S288c) GN=ADE3 PE=1 SV=1	1	1	3	3	8	6.64115	2.80857	22.8833	9.3238	1.60116e-05	3.23212e-05	3.54636	0.985221	1	1	MUT - Control	limma	1.60116e-05	3.23212e-05	TRUE	enriched hit	6.64115
HSP104	P31539	Heat shock protein 104 OS=Saccharomyces cerevisiae (strain ATCC 204508 / S288c) GN=HSP104 PE=1 SV=2	1	1	3	3	9	6.24771	1.82667	22.7771	9.30748	1.62169e-05	3.26489e-05	3.53293	0.985247	1	1	MUT - Control	limma	1.62169e-05	3.26489e-05	TRUE	enriched hit	6.24771
TFC3	P34111	Transcription factor tau 138 kDa subunit OS=Saccharomyces cerevisiae (strain ATCC 204508 / S288c) GN=TFC3 PE=1 SV=1	1	1	3	3	15	6.63706	2.05217	24.4934	9.29454	1.63819e-05	3.28884e-05	3.52225	0.985267	1	1	MUT - Control	limma	1.63819e-05	3.28884e-05	TRUE	enriched hit	6.63706
FUN12	P39730	Eukaryotic translation initiation factor 5B OS=Saccharomyces cerevisiae (strain ATCC 204508 / S288c) GN=FUN12 PE=1 SV=2	1	1	3	3	9	6.71847	2.35998	24.162	9.29138	1.64225e-05	3.28884e-05	3.51964	0.985272	1	1	MUT - Control	limma	1.64225e-05	3.28884e-05	TRUE	enriched hit	6.71847
CDC12	P32468	Cell division control protein 12 OS=Saccharomyces cerevisiae (strain ATCC 204508 / S288c) GN=CDC12 PE=1 SV=1	1	1	3	3	5	6.44737	2.37965	22.5346	9.28076	1.65596e-05	3.29888e-05	3.51088	0.985289	1	1	MUT - Control	limma	1.65596e-05	3.29888e-05	TRUE	enriched hit	6.44737
TOP2	P06786	DNA topoisomerase 2 OS=Saccharomyces cerevisiae (strain ATCC 204508 / S288c) GN=TOP2 PE=1 SV=2	1	1	3	3	16	6.94653	2.60676	24.8326	9.26086	1.68201e-05	3.33743e-05	3.49442	0.985321	1	1	MUT - Control	limma	1.68201e-05	3.33743e-05	TRUE	enriched hit	6.94653
NHP6B	P11633	Non-histone chromosomal protein 6B OS=Saccharomyces cerevisiae (strain ATCC 204508 / S288c) GN=NHP6B PE=1 SV=3	1	1	3	3	5	7.72321	3.08434	24.5899	9.25614	1.68826e-05	3.33743e-05	3.49051	0.985328	1	1	MUT - Control	limma	1.68826e-05	3.33743e-05	TRUE	enriched hit	7.72321
RPL36B	O14455	60S ribosomal protein L36-B OS=Saccharomyces cerevisiae (strain ATCC 204508 / S288c) GN=RPL36B PE=1 SV=3	1	1	3	3	6	7.29962	4.09889	24.0342	9.25595	1.6885e-05	3.33743e-05	3.49036	0.985328	1	1	MUT - Control	limma	1.6885e-05	3.33743e-05	TRUE	enriched hit	7.29962
QCR2	P07257	Cytochrome b-c1 complex subunit 2, mitochondrial OS=Saccharomyces cerevisiae (strain ATCC 204508 / S288c) GN=QCR2 PE=1 SV=1	1	1	3	3	5	6.24538	2.8784	21.8436	9.24929	1.69736e-05	3.34622e-05	3.48484	0.985339	1	1	MUT - Control	limma	1.69736e-05	3.34622e-05	TRUE	enriched hit	6.24538
SEC27	P41811	Coatomer subunit beta' OS=Saccharomyces cerevisiae (strain ATCC 204508 / S288c) GN=SEC27 PE=1 SV=1	1	1	3	3	4	5.82776	1.90343	21.4853	9.24169	1.70753e-05	3.35754e-05	3.47854	0.985351	1	1	MUT - Control	limma	1.70753e-05	3.35754e-05	TRUE	enriched hit	5.82776
OAF1	P39720	Oleate-activated transcription factor 1 OS=Saccharomyces cerevisiae (strain ATCC 204508 / S288c) GN=OAF1 PE=1 SV=3	1	1	3	3	3	6.14483	1.838	22.4933	9.23245	1.71998e-05	3.36693e-05	3.47087	0.985366	1	1	MUT - Control	limma	1.71998e-05	3.36693e-05	TRUE	enriched hit	6.14483
MSY1	P48527	Tyrosine--tRNA ligase, mitochondrial OS=Saccharomyces cerevisiae (strain ATCC 204508 / S288c) GN=MSY1 PE=1 SV=1	1	1	3	3	4	6.11151	2.75643	22.3111	9.23158	1.72117e-05	3.36693e-05	3.47014	0.985367	1	1	MUT - Control	limma	1.72117e-05	3.36693e-05	TRUE	enriched hit	6.11151
SPF1	P39986	Manganese-transporting ATPase 1 OS=Saccharomyces cerevisiae (strain ATCC 204508 / S288c) GN=SPF1 PE=1 SV=1	1	1	3	3	2	5.99997	1.88571	21.0334	9.22218	1.73395e-05	3.3832e-05	3.46234	0.985382	1	1	MUT - Control	limma	1.73395e-05	3.3832e-05	TRUE	enriched hit	5.99997
SRM1	P21827	Guanine nucleotide exchange factor SRM1 OS=Saccharomyces cerevisiae (strain ATCC 204508 / S288c) GN=SRM1 PE=1 SV=1	1	1	3	3	4	6.32175	2.70925	21.7285	9.20539	1.75706e-05	3.41951e-05	3.44837	0.985409	1	1	MUT - Control	limma	1.75706e-05	3.41951e-05	TRUE	enriched hit	6.32175
YCG1	Q06680	Condensin complex subunit 3 OS=Saccharomyces cerevisiae (strain ATCC 204508 / S288c) GN=YCG1 PE=1 SV=2	1	1	3	3	3	5.77449	1.95158	21.1529	9.14129	1.84847e-05	3.58821e-05	3.39484	0.98551	1	1	MUT - Control	limma	1.84847e-05	3.58821e-05	TRUE	enriched hit	5.77449
WRS1	Q12109	Tryptophan--tRNA ligase, cytoplasmic OS=Saccharomyces cerevisiae (strain ATCC 204508 / S288c) GN=WRS1 PE=1 SV=1	1	1	3	3	2	5.65444	2.60821	20.2628	9.13475	1.85809e-05	3.59768e-05	3.38936	0.985521	1	1	MUT - Control	limma	1.85809e-05	3.59768e-05	TRUE	enriched hit	5.65444
IPI3	P53877	Pre-rRNA-processing protein IPI3 OS=Saccharomyces cerevisiae (strain ATCC 204508 / S288c) GN=IPI3 PE=1 SV=1	1	1	3	3	2	5.62823	2.327	19.8989	9.12513	1.87234e-05	3.60763e-05	3.38129	0.985536	1	1	MUT - Control	limma	1.87234e-05	3.60763e-05	TRUE	enriched hit	5.62823
VPS17	P32913	Vacuolar protein sorting-associated protein 17 OS=Saccharomyces cerevisiae (strain ATCC 204508 / S288c) GN=VPS17 PE=1 SV=2	1	1	3	3	3	5.7104	2.02489	21.6402	9.12487	1.87273e-05	3.60763e-05	3.38107	0.985536	1	1	MUT - Control	limma	1.87273e-05	3.60763e-05	TRUE	enriched hit	5.7104
SCP160	P06105	Protein SCP160 OS=Saccharomyces cerevisiae (strain ATCC 204508 / S288c) GN=SCP160 PE=1 SV=3	1	1	3	3	5	6.00433	1.76995	22.1619	9.12054	1.87919e-05	3.61091e-05	3.37743	0.985543	1	1	MUT - Control	limma	1.87919e-05	3.61091e-05	TRUE	enriched hit	6.00433
RRP14	P36080	Ribosomal RNA-processing protein 14 OS=Saccharomyces cerevisiae (strain ATCC 204508 / S288c) GN=RRP14 PE=1 SV=1	1	1	3	3	6	5.99336	2.26944	22.6575	9.10179	1.90744e-05	3.65592e-05	3.36168	0.985573	1	1	MUT - Control	limma	1.90744e-05	3.65592e-05	TRUE	enriched hit	5.99336
RPL7A	P05737	60S ribosomal protein L7-A OS=Saccharomyces cerevisiae (strain ATCC 204508 / S288c) GN=RPL7A PE=1 SV=3	1	1	3	3	11	8.51869	3.77341	25.6381	9.08987	1.92565e-05	3.68152e-05	3.35164	0.985592	1	1	MUT - Control	limma	1.92565e-05	3.68152e-05	TRUE	enriched hit	8.51869
URA2	P07259	Protein URA2 OS=Saccharomyces cerevisiae (strain ATCC 204508 / S288c) GN=URA2 PE=1 SV=5	1	1	3	3	15	6.59485	2.98923	24.4648	9.08242	1.93713e-05	3.69418e-05	3.34536	0.985603	1	1	MUT - Control	limma	1.93713e-05	3.69418e-05	TRUE	enriched hit	6.59485
RPT3	P33298	26S protease regulatory subunit 6B homolog OS=Saccharomyces cerevisiae (strain ATCC 204508 / S288c) GN=RPT3 PE=1 SV=2	1	1	3	3	4	6.19944	2.50903	22.3434	9.06905	1.95792e-05	3.72447e-05	3.33408	0.985625	1	1	MUT - Control	limma	1.95792e-05	3.72447e-05	TRUE	enriched hit	6.19944
ENO2	P00925	Enolase 2 OS=Saccharomyces cerevisiae (strain ATCC 204508 / S288c) GN=ENO2 PE=1 SV=2	1	1	3	3	5	6.47997	1.77715	24.4305	9.05995	1.97221e-05	3.74227e-05	3.3264	0.985639	1	1	MUT - Control	limma	1.97221e-05	3.74227e-05	TRUE	enriched hit	6.47997
GAR1	P28007	H/ACA ribonucleoprotein complex subunit 1 OS=Saccharomyces cerevisiae (strain ATCC 204508 / S288c) GN=GAR1 PE=1 SV=1	1	1	3	3	2	6.53988	2.23747	21.4682	9.05043	1.98728e-05	3.75396e-05	3.31836	0.985654	1	1	MUT - Control	limma	1.98728e-05	3.75396e-05	TRUE	enriched hit	6.53988
GCV2	P49095	Glycine dehydrogenase (decarboxylating), mitochondrial OS=Saccharomyces cerevisiae (strain ATCC 204508 / S288c) GN=GCV2 PE=1 SV=1	1	1	3	3	5	5.74985	2.12905	22.0907	9.04982	1.98826e-05	3.75396e-05	3.31784	0.985655	1	1	MUT - Control	limma	1.98826e-05	3.75396e-05	TRUE	enriched hit	5.74985
CUE5	Q08412	Ubiquitin-binding protein CUE5 OS=Saccharomyces cerevisiae (strain ATCC 204508 / S288c) GN=CUE5 PE=1 SV=1	1	1	3	3	3	5.61934	2.59804	21.7336	9.04442	1.99687e-05	3.76086e-05	3.31327	0.985664	1	1	MUT - Control	limma	1.99687e-05	3.76086e-05	TRUE	enriched hit	5.61934
CPS1	P27614	Carboxypeptidase S OS=Saccharomyces cerevisiae (strain ATCC 204508 / S288c) GN=CPS1 PE=1 SV=2	1	1	3	3	3	5.66225	1.88826	21.3335	9.03909	2.00542e-05	3.76761e-05	3.30876	0.985672	1	1	MUT - Control	limma	2.00542e-05	3.76761e-05	TRUE	enriched hit	5.66225
PRE3	P38624	Proteasome subunit beta type-1 OS=Saccharomyces cerevisiae (strain ATCC 204508 / S288c) GN=PRE3 PE=1 SV=2	1	1	3	3	3	5.99403	1.74684	21.353	9.03512	2.01181e-05	3.77027e-05	3.3054	0.985678	1	1	MUT - Control	limma	2.01181e-05	3.77027e-05	TRUE	enriched hit	5.99403
REB1	P21538	DNA-binding protein REB1 OS=Saccharomyces cerevisiae (strain ATCC 204508 / S288c) GN=REB1 PE=1 SV=2	1	1	3	3	5	6.637	3.15291	22.9837	8.97681	2.10832e-05	3.93713e-05	3.25586	0.985771	1	1	MUT - Control	limma	2.10832e-05	3.93713e-05	TRUE	enriched hit	6.637
MPH1	P40562	ATP-dependent DNA helicase MPH1 OS=Saccharomyces cerevisiae (strain ATCC 204508 / S288c) GN=MPH1 PE=1 SV=1	1	1	3	3	2	5.65829	1.74798	20.8494	8.97511	2.11121e-05	3.93713e-05	3.25442	0.985774	1	1	MUT - Control	limma	2.11121e-05	3.93713e-05	TRUE	enriched hit	5.65829
OLA1	P38219	Obg-like ATPase 1 OS=Saccharomyces cerevisiae (strain ATCC 204508 / S288c) GN=OLA1 PE=1 SV=1	1	1	3	3	2	6.29566	1.75507	21.4372	8.96579	2.12713e-05	3.94954e-05	3.24647	0.985788	1	1	MUT - Control	limma	2.12713e-05	3.94954e-05	TRUE	enriched hit	6.29566
MIS1	P09440	C-1-tetrahydrofolate synthase, mitochondrial OS=Saccharomyces cerevisiae (strain ATCC 204508 / S288c) GN=MIS1 PE=1 SV=1	1	1	3	3	5	6.31649	2.88742	23.1132	8.96077	2.13577e-05	3.94954e-05	3.24219	0.985796	1	1	MUT - Control	limma	2.13577e-05	3.94954e-05	TRUE	enriched hit	6.31649
HSP150	P32478	Cell wall mannoprotein HSP150 OS=Saccharomyces cerevisiae (strain ATCC 204508 / S288c) GN=HSP150 PE=1 SV=2	1	1	3	3	2	6.48953	3.33196	21.5232	8.96076	2.13579e-05	3.94954e-05	3.24218	0.985796	1	1	MUT - Control	limma	2.13579e-05	3.94954e-05	TRUE	enriched hit	6.48953
NHP2	P32495	H/ACA ribonucleoprotein complex subunit 2 OS=Saccharomyces cerevisiae (strain ATCC 204508 / S288c) GN=NHP2 PE=1 SV=2	1	1	3	3	3	6.37317	2.47518	22.8854	8.95908	2.13868e-05	3.94954e-05	3.24075	0.985799	1	1	MUT - Control	limma	2.13868e-05	3.94954e-05	TRUE	enriched hit	6.37317
IDP3	P53982	Isocitrate dehydrogenase [NADP] OS=Saccharomyces cerevisiae (strain ATCC 204508 / S288c) GN=IDP3 PE=3 SV=1	1	1	3	3	2	5.58867	2.05983	20.3841	8.9534	2.14852e-05	3.95808e-05	3.23589	0.985808	1	1	MUT - Control	limma	2.14852e-05	3.95808e-05	TRUE	enriched hit	5.58867
GCN2	P15442	eIF-2-alpha kinase GCN2 OS=Saccharomyces cerevisiae (strain ATCC 204508 / S288c) GN=GCN2 PE=1 SV=3	1	1	3	3	2	6.09425	2.50948	21.0959	8.93967	2.1725e-05	3.98778e-05	3.22416	0.98583	1	1	MUT - Control	limma	2.1725e-05	3.98778e-05	TRUE	enriched hit	6.09425
TAF1	P46677	Transcription initiation factor TFIID subunit 1 OS=Saccharomyces cerevisiae (strain ATCC 204508 / S288c) GN=TAF1 PE=1 SV=1	1	1	3	3	7	6.14189	1.78727	23.1014	8.93684	2.17747e-05	3.98778e-05	3.22174	0.985834	1	1	MUT - Control	limma	2.17747e-05	3.98778e-05	TRUE	enriched hit	6.14189
MGA2	P40578	Protein MGA2 OS=Saccharomyces cerevisiae (strain ATCC 204508 / S288c) GN=MGA2 PE=1 SV=1	1	1	3	3	2	6.48033	1.77715	20.2337	8.9336	2.18318e-05	3.98778e-05	3.21897	0.985839	1	1	MUT - Control	limma	2.18318e-05	3.98778e-05	TRUE	enriched hit	6.48033
RNR1	P21524	Ribonucleoside-diphosphate reductase large chain 1 OS=Saccharomyces cerevisiae (strain ATCC 204508 / S288c) GN=RNR1 PE=1 SV=2	1	1	3	3	4	6.23952	2.43643	22.7924	8.9322	2.18566e-05	3.98778e-05	3.21777	0.985842	1	1	MUT - Control	limma	2.18566e-05	3.98778e-05	TRUE	enriched hit	6.23952
SMC2	P38989	Structural maintenance of chromosomes protein 2 OS=Saccharomyces cerevisiae (strain ATCC 204508 / S288c) GN=SMC2 PE=1 SV=1	1	1	3	3	7	6.01037	2.45979	22.9576	8.92612	2.19645e-05	3.99786e-05	3.21256	0.985851	1	1	MUT - Control	limma	2.19645e-05	3.99786e-05	TRUE	enriched hit	6.01037
PEP4	P07267	Saccharopepsin OS=Saccharomyces cerevisiae (strain ATCC 204508 / S288c) GN=PEP4 PE=1 SV=1	1	1	3	3	2	6.13317	2.37318	20.9497	8.90792	2.22907e-05	4.04486e-05	3.19696	0.98588	1	1	MUT - Control	limma	2.22907e-05	4.04486e-05	TRUE	enriched hit	6.13317
LOC1	P43586	60S ribosomal subunit assembly/export protein LOC1 OS=Saccharomyces cerevisiae (strain ATCC 204508 / S288c) GN=LOC1 PE=1 SV=1	1	1	3	3	3	6.71108	2.99835	21.9012	8.90387	2.23642e-05	4.04486e-05	3.19348	0.985886	1	1	MUT - Control	limma	2.23642e-05	4.04486e-05	TRUE	enriched hit	6.71108
DEF1	P35732	RNA polymerase II degradation factor 1 OS=Saccharomyces cerevisiae (strain ATCC 204508 / S288c) GN=DEF1 PE=1 SV=1	1	1	3	3	4	6.68815	1.77372	24.0127	8.90285	2.23826e-05	4.04486e-05	3.19261	0.985888	1	1	MUT - Control	limma	2.23826e-05	4.04486e-05	TRUE	enriched hit	6.68815
ADH2	P00331	Alcohol dehydrogenase 2 OS=Saccharomyces cerevisiae (strain ATCC 204508 / S288c) GN=ADH2 PE=1 SV=3	1	1	3	3	3	6.17989	2.94294	21.6363	8.88315	2.27436e-05	4.10033e-05	3.17568	0.985919	1	1	MUT - Control	limma	2.27436e-05	4.10033e-05	TRUE	enriched hit	6.17989
ARD1	P07347	N-terminal acetyltransferase A complex catalytic subunit ARD1 OS=Saccharomyces cerevisiae (strain ATCC 204508 / S288c) GN=ARD1 PE=1 SV=2	1	1	3	3	2	5.75496	2.06197	20.1272	8.8783	2.28336e-05	4.10681e-05	3.1715	0.985927	1	1	MUT - Control	limma	2.28336e-05	4.10681e-05	TRUE	enriched hit	5.75496
ERG10	P41338	Acetyl-CoA acetyltransferase OS=Saccharomyces cerevisiae (strain ATCC 204508 / S288c) GN=ERG10 PE=1 SV=3	1	1	3	3	4	6.05177	2.96319	21.3666	8.87447	2.29049e-05	4.10988e-05	3.1682	0.985933	1	1	MUT - Control	limma	2.29049e-05	4.10988e-05	TRUE	enriched hit	6.05177
GDI1	P39958	Rab GDP-dissociation inhibitor OS=Saccharomyces cerevisiae (strain ATCC 204508 / S288c) GN=GDI1 PE=1 SV=1	1	1	3	3	4	6.20966	1.79262	22.5167	8.85263	2.33159e-05	4.17376e-05	3.14938	0.985968	1	1	MUT - Control	limma	2.33159e-05	4.17376e-05	TRUE	enriched hit	6.20966
MDG1	P53885	Signal transduction protein MDG1 OS=Saccharomyces cerevisiae (strain ATCC 204508 / S288c) GN=MDG1 PE=1 SV=1	1	1	3	3	3	6.34562	2.39008	21.2484	8.84493	2.34629e-05	4.18144e-05	3.14273	0.98598	1	1	MUT - Control	limma	2.34629e-05	4.18144e-05	TRUE	enriched hit	6.34562
INO1	P11986	Inositol-3-phosphate synthase OS=Saccharomyces cerevisiae (strain ATCC 204508 / S288c) GN=INO1 PE=1 SV=3	1	1	3	3	3	5.83791	2.44998	21.7546	8.84461	2.3469e-05	4.18144e-05	3.14246	0.98598	1	1	MUT - Control	limma	2.3469e-05	4.18144e-05	TRUE	enriched hit	5.83791
RPN6	Q12377	26S proteasome regulatory subunit RPN6 OS=Saccharomyces cerevisiae (strain ATCC 204508 / S288c) GN=RPN6 PE=1 SV=3	1	1	3	3	2	5.75174	1.78479	20.9474	8.81717	2.40011e-05	4.26367e-05	3.11872	0.986024	1	1	MUT - Control	limma	2.40011e-05	4.26367e-05	TRUE	enriched hit	5.75174
HHT1	P61830	Histone H3 OS=Saccharomyces cerevisiae (strain ATCC 204508 / S288c) GN=HHT1 PE=1 SV=2	1	1	3	3	5	7.57343	2.08356	26.1141	8.81504	2.40428e-05	4.26367e-05	3.11688	0.986027	1	1	MUT - Control	limma	2.40428e-05	4.26367e-05	TRUE	enriched hit	7.57343
GLR1	P41921|P41921-2	Glutathione reductase OS=Saccharomyces cerevisiae (strain ATCC 204508 / S288c) GN=GLR1 PE=1 SV=2|Isoform 2 of Glutathione reductase OS=Saccharomyces cerevisiae (strain ATCC 204508 / S288c) GN=GLR1	1	1	3	3	3	5.38695	1.94337	21.3719	8.81039	2.41346e-05	4.26997e-05	3.11285	0.986035	1	1	MUT - Control	limma	2.41346e-05	4.26997e-05	TRUE	enriched hit	5.38695
MRP7	P12687	54S ribosomal protein L2, mitochondrial OS=Saccharomyces cerevisiae (strain ATCC 204508 / S288c) GN=MRP7 PE=1 SV=1	1	1	3	3	4	6.23624	2.74327	21.7956	8.79611	2.44186e-05	4.31017e-05	3.10046	0.986057	1	1	MUT - Control	limma	2.44186e-05	4.31017e-05	TRUE	enriched hit	6.23624
PUP2	P32379	Proteasome subunit alpha type-5 OS=Saccharomyces cerevisiae (strain ATCC 204508 / S288c) GN=PUP2 PE=1 SV=2	1	1	3	3	3	5.84491	2.07878	21.5267	8.79202	2.45006e-05	4.3146e-05	3.09691	0.986064	1	1	MUT - Control	limma	2.45006e-05	4.3146e-05	TRUE	enriched hit	5.84491
ERG6	P25087	Sterol 24-C-methyltransferase OS=Saccharomyces cerevisiae (strain ATCC 204508 / S288c) GN=ERG6 PE=1 SV=4	1	1	3	3	6	6.55812	1.7249	24.1518	8.77569	2.48311e-05	4.36269e-05	3.08272	0.98609	1	1	MUT - Control	limma	2.48311e-05	4.36269e-05	TRUE	enriched hit	6.55812
YNL247W	P53852	Cysteine--tRNA ligase OS=Saccharomyces cerevisiae (strain ATCC 204508 / S288c) GN=YNL247W PE=1 SV=1	1	1	3	3	11	6.51332	2.27264	24.0107	8.76622	2.50251e-05	4.37977e-05	3.07448	0.986105	1	1	MUT - Control	limma	2.50251e-05	4.37977e-05	TRUE	enriched hit	6.51332
TRM1	P15565|P15565-2	tRNA (guanine(26)-N(2))-dimethyltransferase, mitochondrial OS=Saccharomyces cerevisiae (strain ATCC 204508 / S288c) GN=TRM1 PE=1 SV=1|Isoform 2 of tRNA (guanine(26)-N(2))-dimethyltransferase, mitochondrial OS=Saccharomyces cerevisiae (strain ATCC 204508 / S288c) GN=TRM1	1	1	3	3	2	5.84309	2.03575	20.8012	8.76531	2.50438e-05	4.37977e-05	3.07369	0.986106	1	1	MUT - Control	limma	2.50438e-05	4.37977e-05	TRUE	enriched hit	5.84309
MSH6	Q03834	DNA mismatch repair protein MSH6 OS=Saccharomyces cerevisiae (strain ATCC 204508 / S288c) GN=MSH6 PE=1 SV=1	1	1	3	3	5	6.20984	3.06925	21.8216	8.76118	2.51289e-05	4.38456e-05	3.07009	0.986113	1	1	MUT - Control	limma	2.51289e-05	4.38456e-05	TRUE	enriched hit	6.20984
TCP1	P12612	T-complex protein 1 subunit alpha OS=Saccharomyces cerevisiae (strain ATCC 204508 / S288c) GN=TCP1 PE=1 SV=2	1	1	3	3	4	5.88602	2.31449	22.0806	8.75694	2.52167e-05	4.38979e-05	3.0664	0.986119	1	1	MUT - Control	limma	2.52167e-05	4.38979e-05	TRUE	enriched hit	5.88602
PRP19	P32523	Pre-mRNA-processing factor 19 OS=Saccharomyces cerevisiae (strain ATCC 204508 / S288c) GN=PRP19 PE=1 SV=2	1	1	3	3	2	5.55948	2.78802	20.1048	8.75085	2.53435e-05	4.40177e-05	3.06108	0.986129	1	1	MUT - Control	limma	2.53435e-05	4.40177e-05	TRUE	enriched hit	5.55948
SMC6	Q12749	Structural maintenance of chromosomes protein 6 OS=Saccharomyces cerevisiae (strain ATCC 204508 / S288c) GN=SMC6 PE=1 SV=1	1	1	3	3	2	5.66169	2.35535	21.3323	8.74285	2.55111e-05	4.40421e-05	3.0541	0.986142	1	1	MUT - Control	limma	2.55111e-05	4.40421e-05	TRUE	enriched hit	5.66169
RPS30A|RPS30B	P0CX33|P0CX34	40S ribosomal protein S30-A OS=Saccharomyces cerevisiae (strain ATCC 204508 / S288c) GN=RPS30A PE=1 SV=1|40S ribosomal protein S30-B OS=Saccharomyces cerevisiae (strain ATCC 204508 / S288c) GN=RPS30B PE=1 SV=1	1	1	3	3	2	6.3901	2.31393	21.1103	8.74203	2.55282e-05	4.40421e-05	3.05339	0.986143	1	1	MUT - Control	limma	2.55282e-05	4.40421e-05	TRUE	enriched hit	6.3901
SEC7	P11075	Protein transport protein SEC7 OS=Saccharomyces cerevisiae (strain ATCC 204508 / S288c) GN=SEC7 PE=1 SV=2	1	1	3	3	2	5.49783	1.72144	20.4116	8.74095	2.5551e-05	4.40421e-05	3.05245	0.986145	1	1	MUT - Control	limma	2.5551e-05	4.40421e-05	TRUE	enriched hit	5.49783
TRA1	P38811	Transcription-associated protein 1 OS=Saccharomyces cerevisiae (strain ATCC 204508 / S288c) GN=TRA1 PE=1 SV=1	1	1	3	3	18	6.68343	2.74941	24.1498	8.73911	2.55897e-05	4.40421e-05	3.05084	0.986148	1	1	MUT - Control	limma	2.55897e-05	4.40421e-05	TRUE	enriched hit	6.68343
ISW1	P38144	ISWI chromatin-remodeling complex ATPase ISW1 OS=Saccharomyces cerevisiae (strain ATCC 204508 / S288c) GN=ISW1 PE=1 SV=2	1	1	3	3	18	7.37807	2.69971	25.0246	8.72809	2.58234e-05	4.43437e-05	3.04121	0.986165	1	1	MUT - Control	limma	2.58234e-05	4.43437e-05	TRUE	enriched hit	7.37807
KGD1	P20967	2-oxoglutarate dehydrogenase, mitochondrial OS=Saccharomyces cerevisiae (strain ATCC 204508 / S288c) GN=KGD1 PE=1 SV=2	1	1	3	3	6	6.61167	2.52896	23.4731	8.71549	2.60935e-05	4.47064e-05	3.03019	0.986185	1	1	MUT - Control	limma	2.60935e-05	4.47064e-05	TRUE	enriched hit	6.61167
RRP5	Q05022	rRNA biogenesis protein RRP5 OS=Saccharomyces cerevisiae (strain ATCC 204508 / S288c) GN=RRP5 PE=1 SV=1	1	1	3	3	6	6.09207	1.83333	22.6398	8.70055	2.64176e-05	4.51598e-05	3.0171	0.986209	1	1	MUT - Control	limma	2.64176e-05	4.51598e-05	TRUE	enriched hit	6.09207
GLC3	P32775	1,4-alpha-glucan-branching enzyme OS=Saccharomyces cerevisiae (strain ATCC 204508 / S288c) GN=GLC3 PE=1 SV=2	1	1	3	3	7	6.1083	1.90508	22.804	8.68197	2.68272e-05	4.5757e-05	3.0008	0.986238	1	1	MUT - Control	limma	2.68272e-05	4.5757e-05	TRUE	enriched hit	6.1083
KIN1	P13185	Serine/threonine protein kinase KIN1 OS=Saccharomyces cerevisiae (strain ATCC 204508 / S288c) GN=KIN1 PE=1 SV=3	1	1	3	3	2	5.40693	2.11633	18.9939	8.67147	2.70617e-05	4.60534e-05	2.99157	0.986255	1	1	MUT - Control	limma	2.70617e-05	4.60534e-05	TRUE	enriched hit	5.40693
GAS1	P22146	1,3-beta-glucanosyltransferase GAS1 OS=Saccharomyces cerevisiae (strain ATCC 204508 / S288c) GN=GAS1 PE=1 SV=2	1	1	3	3	3	6.13597	2.29383	22.5615	8.64834	2.75865e-05	4.68415e-05	2.97121	0.986291	1	1	MUT - Control	limma	2.75865e-05	4.68415e-05	TRUE	enriched hit	6.13597
SRP40	P32583	Suppressor protein SRP40 OS=Saccharomyces cerevisiae (strain ATCC 204508 / S288c) GN=SRP40 PE=1 SV=2	1	1	3	3	5	6.9346	3.33927	22.7502	8.60824	2.85235e-05	4.83244e-05	2.93579	0.986355	1	1	MUT - Control	limma	2.85235e-05	4.83244e-05	TRUE	enriched hit	6.9346
HOS3	Q02959	Histone deacetylase HOS3 OS=Saccharomyces cerevisiae (strain ATCC 204508 / S288c) GN=HOS3 PE=1 SV=1	1	1	3	3	3	5.95809	1.9162	21.7565	8.6031	2.86462e-05	4.84242e-05	2.93124	0.986363	1	1	MUT - Control	limma	2.86462e-05	4.84242e-05	TRUE	enriched hit	5.95809
CBF5	P33322	H/ACA ribonucleoprotein complex subunit 4 OS=Saccharomyces cerevisiae (strain ATCC 204508 / S288c) GN=CBF5 PE=1 SV=1	1	1	3	3	4	6.44731	3.14744	22.292	8.59181	2.89176e-05	4.87743e-05	2.92124	0.986381	1	1	MUT - Control	limma	2.89176e-05	4.87743e-05	TRUE	enriched hit	6.44731
MRPL32	P25348	54S ribosomal protein L32, mitochondrial OS=Saccharomyces cerevisiae (strain ATCC 204508 / S288c) GN=MRPL32 PE=1 SV=1	1	1	3	3	2	6.09913	2.97807	20.288	8.58059	2.91903e-05	4.91252e-05	2.91128	0.986399	1	1	MUT - Control	limma	2.91903e-05	4.91252e-05	TRUE	enriched hit	6.09913
HHO1	P53551	Histone H1 OS=Saccharomyces cerevisiae (strain ATCC 204508 / S288c) GN=HHO1 PE=1 SV=1	1	1	3	3	6	7.28543	3.62204	24.1251	8.57249	2.9389e-05	4.92748e-05	2.90409	0.986412	1	1	MUT - Control	limma	2.9389e-05	4.92748e-05	TRUE	enriched hit	7.28543
INO80	P53115	Putative DNA helicase INO80 OS=Saccharomyces cerevisiae (strain ATCC 204508 / S288c) GN=INO80 PE=1 SV=1	1	1	3	3	4	5.66964	2.2878	21.2624	8.57067	2.94337e-05	4.92748e-05	2.90247	0.986415	1	1	MUT - Control	limma	2.94337e-05	4.92748e-05	TRUE	enriched hit	5.66964
GPT2	P36148	Glycerol-3-phosphate O-acyltransferase 2 OS=Saccharomyces cerevisiae (strain ATCC 204508 / S288c) GN=GPT2 PE=1 SV=1	1	1	3	3	4	5.63711	2.24166	21.457	8.56904	2.9474e-05	4.92748e-05	2.90102	0.986417	1	1	MUT - Control	limma	2.9474e-05	4.92748e-05	TRUE	enriched hit	5.63711
STE24	P47154	CAAX prenyl protease 1 OS=Saccharomyces cerevisiae (strain ATCC 204508 / S288c) GN=STE24 PE=1 SV=1	1	1	3	3	2	5.81539	2.28692	20.7221	8.56343	2.96127e-05	4.93979e-05	2.89604	0.986426	1	1	MUT - Control	limma	2.96127e-05	4.93979e-05	TRUE	enriched hit	5.81539
NPL6	P32832	Chromatin structure-remodeling complex subunit RSC7 OS=Saccharomyces cerevisiae (strain ATCC 204508 / S288c) GN=NPL6 PE=1 SV=1	1	1	3	3	6	5.79328	2.14352	21.9395	8.55637	2.97887e-05	4.95826e-05	2.88975	0.986437	1	1	MUT - Control	limma	2.97887e-05	4.95826e-05	TRUE	enriched hit	5.79328
SRL2	Q12020	Protein SRL2 OS=Saccharomyces cerevisiae (strain ATCC 204508 / S288c) GN=SRL2 PE=1 SV=1	1	1	3	3	2	5.49655	1.96609	20.4338	8.54749	3.00113e-05	4.98437e-05	2.88186	0.986451	1	1	MUT - Control	limma	3.00113e-05	4.98437e-05	TRUE	enriched hit	5.49655
PRO3	P32263	Pyrroline-5-carboxylate reductase OS=Saccharomyces cerevisiae (strain ATCC 204508 / S288c) GN=PRO3 PE=1 SV=1	1	1	3	3	3	5.62514	1.9466	21.1964	8.53747	3.02651e-05	5.01555e-05	2.87292	0.986467	1	1	MUT - Control	limma	3.02651e-05	5.01555e-05	TRUE	enriched hit	5.62514
RTS2	P40962	Zinc finger protein RTS2 OS=Saccharomyces cerevisiae (strain ATCC 204508 / S288c) GN=RTS2 PE=1 SV=1	1	1	3	3	2	5.68878	2.07179	20.6268	8.5282	3.05017e-05	5.04375e-05	2.86466	0.986482	1	1	MUT - Control	limma	3.05017e-05	5.04375e-05	TRUE	enriched hit	5.68878
SES1	P07284	Serine--tRNA ligase, cytoplasmic OS=Saccharomyces cerevisiae (strain ATCC 204508 / S288c) GN=SES1 PE=1 SV=2	1	1	3	3	6	6.56839	2.44447	23.315	8.50648	3.10647e-05	5.12568e-05	2.84525	0.986516	1	1	MUT - Control	limma	3.10647e-05	5.12568e-05	TRUE	enriched hit	6.56839
CDC24	P11433	Cell division control protein 24 OS=Saccharomyces cerevisiae (strain ATCC 204508 / S288c) GN=CDC24 PE=1 SV=2	1	1	3	3	2	5.42623	3.13366	19.5735	8.47893	3.17956e-05	5.23489e-05	2.82056	0.98656	1	1	MUT - Control	limma	3.17956e-05	5.23489e-05	TRUE	enriched hit	5.42623
RFA1	P22336	Replication factor A protein 1 OS=Saccharomyces cerevisiae (strain ATCC 204508 / S288c) GN=RFA1 PE=1 SV=1	1	1	3	3	11	6.35043	2.16038	23.1553	8.45457	3.24576e-05	5.33233e-05	2.79868	0.986599	1	1	MUT - Control	limma	3.24576e-05	5.33233e-05	TRUE	enriched hit	6.35043
SLM1	P40485	Phosphatidylinositol 4,5-bisphosphate-binding protein SLM1 OS=Saccharomyces cerevisiae (strain ATCC 204508 / S288c) GN=SLM1 PE=1 SV=1	1	1	3	3	4	6.27367	3.35604	22.6387	8.44159	3.28167e-05	5.37303e-05	2.787	0.986619	1	1	MUT - Control	limma	3.28167e-05	5.37303e-05	TRUE	enriched hit	6.27367
PCK1	P10963	Phosphoenolpyruvate carboxykinase [ATP] OS=Saccharomyces cerevisiae (strain ATCC 204508 / S288c) GN=PCK1 PE=1 SV=2	1	1	3	3	11	7.46373	2.32846	24.3243	8.4405	3.2847e-05	5.37303e-05	2.78602	0.986621	1	1	MUT - Control	limma	3.2847e-05	5.37303e-05	TRUE	enriched hit	7.46373
NIP1	P32497	Eukaryotic translation initiation factor 3 subunit C OS=Saccharomyces cerevisiae (strain ATCC 204508 / S288c) GN=NIP1 PE=1 SV=2	1	1	3	3	4	6.16347	2.4353	21.418	8.42256	3.33512e-05	5.44378e-05	2.76984	0.986649	1	1	MUT - Control	limma	3.33512e-05	5.44378e-05	TRUE	enriched hit	6.16347
SWC3	P31376	SWR1-complex protein 3 OS=Saccharomyces cerevisiae (strain ATCC 204508 / S288c) GN=SWC3 PE=1 SV=2	1	1	3	3	5	6.2331	2.49345	22.5817	8.39676	3.40914e-05	5.55265e-05	2.74652	0.98669	1	1	MUT - Control	limma	3.40914e-05	5.55265e-05	TRUE	enriched hit	6.2331
ZTA1	P38230	Probable quinone oxidoreductase OS=Saccharomyces cerevisiae (strain ATCC 204508 / S288c) GN=ZTA1 PE=1 SV=1	1	1	3	3	5	6.44127	2.01168	23.378	8.37341	3.47771e-05	5.6522e-05	2.72537	0.986727	1	1	MUT - Control	limma	3.47771e-05	5.6522e-05	TRUE	enriched hit	6.44127
DNM1	P54861	Dynamin-related protein DNM1 OS=Saccharomyces cerevisiae (strain ATCC 204508 / S288c) GN=DNM1 PE=1 SV=1	1	1	3	3	2	5.96651	2.21517	20.927	8.35346	3.53751e-05	5.72557e-05	2.70725	0.986759	1	1	MUT - Control	limma	3.53751e-05	5.72557e-05	TRUE	enriched hit	5.96651
NIC96	P34077	Nucleoporin NIC96 OS=Saccharomyces cerevisiae (strain ATCC 204508 / S288c) GN=NIC96 PE=1 SV=2	1	1	3	3	5	5.84957	1.62896	22.3683	8.35332	3.53794e-05	5.72557e-05	2.70712	0.986759	1	1	MUT - Control	limma	3.53794e-05	5.72557e-05	TRUE	enriched hit	5.84957
IOC2	Q12072	ISWI one complex protein 2 OS=Saccharomyces cerevisiae (strain ATCC 204508 / S288c) GN=IOC2 PE=1 SV=1	1	1	3	3	6	6.36333	2.53356	23.3243	8.33973	3.57933e-05	5.76814e-05	2.69476	0.986781	1	1	MUT - Control	limma	3.57933e-05	5.76814e-05	TRUE	enriched hit	6.36333
LSM12	P38828	Protein LSM12 OS=Saccharomyces cerevisiae (strain ATCC 204508 / S288c) GN=LSM12 PE=1 SV=1	1	1	3	3	4	5.93313	1.74738	22.257	8.33969	3.57944e-05	5.76814e-05	2.69473	0.986781	1	1	MUT - Control	limma	3.57944e-05	5.76814e-05	TRUE	enriched hit	5.93313
YMR027W	Q04371	Protein-glutamate O-methyltransferase OS=Saccharomyces cerevisiae (strain ATCC 204508 / S288c) GN=YMR027W PE=1 SV=1	1	1	3	3	3	5.83826	2.00569	21.5867	8.29663	3.71424e-05	5.96428e-05	2.65544	0.986849	1	1	MUT - Control	limma	3.71424e-05	5.96428e-05	TRUE	enriched hit	5.83826
ERV29	P53337	ER-derived vesicles protein ERV29 OS=Saccharomyces cerevisiae (strain ATCC 204508 / S288c) GN=ERV29 PE=1 SV=1	1	1	3	3	2	5.65105	2.5176	19.2991	8.29581	3.71687e-05	5.96428e-05	2.65469	0.98685	1	1	MUT - Control	limma	3.71687e-05	5.96428e-05	TRUE	enriched hit	5.65105
YDR341C	Q05506	Arginine--tRNA ligase, cytoplasmic OS=Saccharomyces cerevisiae (strain ATCC 204508 / S288c) GN=YDR341C PE=1 SV=1	1	1	3	3	3	5.62222	1.87349	20.6608	8.28781	3.74255e-05	5.99281e-05	2.64737	0.986863	1	1	MUT - Control	limma	3.74255e-05	5.99281e-05	TRUE	enriched hit	5.62222
RPS7B	P48164	40S ribosomal protein S7-B OS=Saccharomyces cerevisiae (strain ATCC 204508 / S288c) GN=RPS7B PE=1 SV=1	1	1	3	3	3	6.06608	2.28707	23.3362	8.28369	3.75584e-05	6.00143e-05	2.6436	0.986869	1	1	MUT - Control	limma	3.75584e-05	6.00143e-05	TRUE	enriched hit	6.06608
DBP3	P20447	ATP-dependent RNA helicase DBP3 OS=Saccharomyces cerevisiae (strain ATCC 204508 / S288c) GN=DBP3 PE=1 SV=2	1	1	3	3	2	5.72842	2.10221	20.8143	8.27387	3.78777e-05	6.02243e-05	2.6346	0.986885	1	1	MUT - Control	limma	3.78777e-05	6.02243e-05	TRUE	enriched hit	5.72842
EIS1	Q05050	Eisosome protein 1 OS=Saccharomyces cerevisiae (strain ATCC 204508 / S288c) GN=EIS1 PE=1 SV=1	1	1	3	3	5	6.04889	1.91953	22.4312	8.27303	3.79049e-05	6.02243e-05	2.63383	0.986886	1	1	MUT - Control	limma	3.79049e-05	6.02243e-05	TRUE	enriched hit	6.04889
YDR115W	Q04598	54S ribosomal protein L34, mitochondrial OS=Saccharomyces cerevisiae (strain ATCC 204508 / S288c) GN=YDR115W PE=1 SV=1	1	1	3	3	2	6.70868	2.13627	21.0309	8.27234	3.79278e-05	6.02243e-05	2.63319	0.986887	1	1	MUT - Control	limma	3.79278e-05	6.02243e-05	TRUE	enriched hit	6.70868
RPB8	P20436	DNA-directed RNA polymerases I, II, and III subunit RPABC3 OS=Saccharomyces cerevisiae (strain ATCC 204508 / S288c) GN=RPB8 PE=1 SV=1	1	1	3	3	3	6.18971	2.54902	22.5211	8.25517	3.8494e-05	6.09957e-05	2.61743	0.986915	1	1	MUT - Control	limma	3.8494e-05	6.09957e-05	TRUE	enriched hit	6.18971
RIO2	P40160	Serine/threonine-protein kinase RIO2 OS=Saccharomyces cerevisiae (strain ATCC 204508 / S288c) GN=RIO2 PE=1 SV=1	1	1	3	3	2	6.04239	2.44124	21.4265	8.2341	3.92018e-05	6.19878e-05	2.59806	0.986948	1	1	MUT - Control	limma	3.92018e-05	6.19878e-05	TRUE	enriched hit	6.04239
SAC6	P32599	Fimbrin OS=Saccharomyces cerevisiae (strain ATCC 204508 / S288c) GN=SAC6 PE=1 SV=1	1	1	3	3	2	5.77787	2.14299	20.2239	8.22831	3.93987e-05	6.21696e-05	2.59273	0.986957	1	1	MUT - Control	limma	3.93987e-05	6.21696e-05	TRUE	enriched hit	5.77787
RPL42A|RPL42B	P0CX27|P0CX28	60S ribosomal protein L42-A OS=Saccharomyces cerevisiae (strain ATCC 204508 / S288c) GN=RPL42A PE=1 SV=1|60S ribosomal protein L42-B OS=Saccharomyces cerevisiae (strain ATCC 204508 / S288c) GN=RPL42B PE=1 SV=1	1	1	3	3	3	7.94731	3.8858	24.1627	8.22156	3.96299e-05	6.24047e-05	2.58651	0.986968	1	1	MUT - Control	limma	3.96299e-05	6.24047e-05	TRUE	enriched hit	7.94731
RTS1	P38903	Serine/threonine-protein phosphatase 2A 56 kDa regulatory subunit delta isoform OS=Saccharomyces cerevisiae (strain ATCC 204508 / S288c) GN=RTS1 PE=1 SV=2	1	1	3	3	3	6.18327	2.85008	21.6094	8.2097	4.00395e-05	6.28814e-05	2.57557	0.986987	1	1	MUT - Control	limma	4.00395e-05	6.28814e-05	TRUE	enriched hit	6.18327
RPA190	P10964	DNA-directed RNA polymerase I subunit RPA190 OS=Saccharomyces cerevisiae (strain ATCC 204508 / S288c) GN=RPA190 PE=1 SV=2	1	1	3	3	4	5.75393	2.19963	21.2531	8.20801	4.00983e-05	6.28814e-05	2.57401	0.986989	1	1	MUT - Control	limma	4.00983e-05	6.28814e-05	TRUE	enriched hit	5.75393
MKT1	P40850	Protein MKT1 OS=Saccharomyces cerevisiae (strain ATCC 204508 / S288c) GN=MKT1 PE=1 SV=2	1	1	3	3	5	6.01777	1.78184	21.9056	8.17408	4.12984e-05	6.46299e-05	2.54263	0.987043	1	1	MUT - Control	limma	4.12984e-05	6.46299e-05	TRUE	enriched hit	6.01777
CMR1	Q12510	DNA damage-binding protein CMR1 OS=Saccharomyces cerevisiae (strain ATCC 204508 / S288c) GN=CMR1 PE=1 SV=1	1	1	3	3	6	6.63331	3.26652	22.7304	8.1717	4.13843e-05	6.46311e-05	2.54042	0.987047	1	1	MUT - Control	limma	4.13843e-05	6.46311e-05	TRUE	enriched hit	6.63331
RPL13B|RPL13A	P40212|Q12690	60S ribosomal protein L13-B OS=Saccharomyces cerevisiae (strain ATCC 204508 / S288c) GN=RPL13B PE=1 SV=1|60S ribosomal protein L13-A OS=Saccharomyces cerevisiae (strain ATCC 204508 / S288c) GN=RPL13A PE=1 SV=1	1	1	3	3	8	8.03646	3.01417	24.4868	8.13437	4.27547e-05	6.6634e-05	2.50576	0.987106	1	1	MUT - Control	limma	4.27547e-05	6.6634e-05	TRUE	enriched hit	8.03646
APN1	P22936	DNA-(apurinic or apyrimidinic site) lyase 1 OS=Saccharomyces cerevisiae (strain ATCC 204508 / S288c) GN=APN1 PE=1 SV=4	1	1	3	3	5	5.96491	2.00763	22.0638	8.09931	4.40877e-05	6.85709e-05	2.47307	0.987162	1	1	MUT - Control	limma	4.40877e-05	6.85709e-05	TRUE	enriched hit	5.96491
YLR455W	Q06188	PWWP domain-containing protein YLR455W OS=Saccharomyces cerevisiae (strain ATCC 204508 / S288c) GN=YLR455W PE=1 SV=1	1	1	3	3	6	7.09205	2.09364	23.9725	8.0919	4.43754e-05	6.88771e-05	2.46615	0.987173	1	1	MUT - Control	limma	4.43754e-05	6.88771e-05	TRUE	enriched hit	7.09205
GLK1	P17709	Glucokinase-1 OS=Saccharomyces cerevisiae (strain ATCC 204508 / S288c) GN=GLK1 PE=1 SV=1	1	1	3	3	4	6.56212	2.25726	24.2235	8.07522	4.50302e-05	6.97509e-05	2.45055	0.9872	1	1	MUT - Control	limma	4.50302e-05	6.97509e-05	TRUE	enriched hit	6.56212
NAM7	P30771	ATP-dependent helicase NAM7 OS=Saccharomyces cerevisiae (strain ATCC 204508 / S288c) GN=NAM7 PE=1 SV=1	1	1	3	3	3	5.72796	1.95883	21.1563	8.0657	4.54092e-05	7.01947e-05	2.44163	0.987215	1	1	MUT - Control	limma	4.54092e-05	7.01947e-05	TRUE	enriched hit	5.72796
VAS1	P07806|P07806-2	Valine--tRNA ligase, mitochondrial OS=Saccharomyces cerevisiae (strain ATCC 204508 / S288c) GN=VAS1 PE=1 SV=2|Isoform Cytoplasmic of Valine--tRNA ligase, mitochondrial OS=Saccharomyces cerevisiae (strain ATCC 204508 / S288c) GN=VAS1	1	1	3	3	7	6.18446	1.57594	22.9614	8.0579	4.5722e-05	7.05345e-05	2.43432	0.987227	1	1	MUT - Control	limma	4.5722e-05	7.05345e-05	TRUE	enriched hit	6.18446
DUG1	P43616	Cys-Gly metallodipeptidase DUG1 OS=Saccharomyces cerevisiae (strain ATCC 204508 / S288c) GN=DUG1 PE=1 SV=1	1	1	3	3	2	5.45243	1.68593	19.177	8.00928	0.000100566	0.00013853	1.79624	0.987304	1	1	MUT - Control	limma	0.000100566	0.00013853	TRUE	enriched hit	5.45243
SYP1	P25623	Suppressor of yeast profilin deletion OS=Saccharomyces cerevisiae (strain ATCC 204508 / S288c) GN=SYP1 PE=1 SV=3	1	1	3	3	5	5.97748	1.49558	22.6306	7.97728	4.91017e-05	7.55947e-05	2.35836	0.987355	1	1	MUT - Control	limma	4.91017e-05	7.55947e-05	TRUE	enriched hit	5.97748
RML2	P32611	54S ribosomal protein RML2, mitochondrial OS=Saccharomyces cerevisiae (strain ATCC 204508 / S288c) GN=RML2 PE=1 SV=1	1	1	3	3	4	6.80724	3.4829	22.1732	7.9647	4.96534e-05	7.62893e-05	2.34646	0.987375	1	1	MUT - Control	limma	4.96534e-05	7.62893e-05	TRUE	enriched hit	6.80724
RPT1	P33299	26S protease regulatory subunit 7 homolog OS=Saccharomyces cerevisiae (strain ATCC 204508 / S288c) GN=RPT1 PE=1 SV=1	1	1	3	3	4	5.85572	1.82431	21.685	7.9509	5.02669e-05	7.7076e-05	2.33337	0.987397	1	1	MUT - Control	limma	5.02669e-05	7.7076e-05	TRUE	enriched hit	5.85572
CIT1	P00890	Citrate synthase, mitochondrial OS=Saccharomyces cerevisiae (strain ATCC 204508 / S288c) GN=CIT1 PE=1 SV=2	1	1	3	3	7	7.46513	3.18442	24.5751	7.92833	5.12887e-05	7.84842e-05	2.31192	0.987433	1	1	MUT - Control	limma	5.12887e-05	7.84842e-05	TRUE	enriched hit	7.46513
PCS60	P38137	Peroxisomal-coenzyme A synthetase OS=Saccharomyces cerevisiae (strain ATCC 204508 / S288c) GN=PCS60 PE=1 SV=1	1	1	3	3	8	7.11416	2.40742	24.5633	7.91662	5.18279e-05	7.91497e-05	2.30078	0.987451	1	1	MUT - Control	limma	5.18279e-05	7.91497e-05	TRUE	enriched hit	7.11416
PWP1	P21304	Periodic tryptophan protein 1 OS=Saccharomyces cerevisiae (strain ATCC 204508 / S288c) GN=PWP1 PE=1 SV=1	1	1	3	3	2	5.53725	2.26072	21.6087	7.89724	5.27341e-05	8.03718e-05	2.2823	0.987482	1	1	MUT - Control	limma	5.27341e-05	8.03718e-05	TRUE	enriched hit	5.53725
UME6	P39001	Transcriptional regulatory protein UME6 OS=Saccharomyces cerevisiae (strain ATCC 204508 / S288c) GN=UME6 PE=1 SV=2	1	1	3	3	2	6.10266	2.26921	19.8721	7.89336	0.000110186	0.000149876	1.69841	0.987488	1	1	MUT - Control	limma	0.000110186	0.000149876	TRUE	enriched hit	6.10266
POM33	Q12164	Pore membrane protein of 33 kDa OS=Saccharomyces cerevisiae (strain ATCC 204508 / S288c) GN=POM33 PE=1 SV=1	1	1	3	3	2	6.18394	2.35234	21.2497	7.87156	5.39622e-05	8.20788e-05	2.25776	0.987523	1	1	MUT - Control	limma	5.39622e-05	8.20788e-05	TRUE	enriched hit	6.18394
CCT3	P39077	T-complex protein 1 subunit gamma OS=Saccharomyces cerevisiae (strain ATCC 204508 / S288c) GN=CCT3 PE=1 SV=2	1	1	3	3	3	5.82064	1.85048	21.2777	7.82941	5.60476e-05	8.50803e-05	2.21733	0.987589	1	1	MUT - Control	limma	5.60476e-05	8.50803e-05	TRUE	enriched hit	5.82064
GGA2	P38817	ADP-ribosylation factor-binding protein GGA2 OS=Saccharomyces cerevisiae (strain ATCC 204508 / S288c) GN=GGA2 PE=1 SV=1	1	1	3	3	2	5.76612	2.27137	21.3359	7.8115	5.69608e-05	8.62939e-05	2.20009	0.987618	1	1	MUT - Control	limma	5.69608e-05	8.62939e-05	TRUE	enriched hit	5.76612
TMA22	P47089	Translation machinery-associated protein 22 OS=Saccharomyces cerevisiae (strain ATCC 204508 / S288c) GN=TMA22 PE=1 SV=1	1	1	3	3	2	6.59823	2.94449	21.2741	7.8072	5.71821e-05	8.64566e-05	2.19595	0.987625	1	1	MUT - Control	limma	5.71821e-05	8.64566e-05	TRUE	enriched hit	6.59823
SMY2	P32909	Protein SMY2 OS=Saccharomyces cerevisiae (strain ATCC 204508 / S288c) GN=SMY2 PE=1 SV=2	1	1	3	3	6	6.24637	2.18552	23.545	7.7905	5.80523e-05	8.75508e-05	2.17984	0.987651	1	1	MUT - Control	limma	5.80523e-05	8.75508e-05	TRUE	enriched hit	6.24637
IMG2	P25642	54S ribosomal protein IMG2, mitochondrial OS=Saccharomyces cerevisiae (strain ATCC 204508 / S288c) GN=IMG2 PE=1 SV=2	1	1	3	3	3	5.64162	1.9141	21.5555	7.7889	5.81365e-05	8.75508e-05	2.1783	0.987654	1	1	MUT - Control	limma	5.81365e-05	8.75508e-05	TRUE	enriched hit	5.64162
TOP1	P04786	DNA topoisomerase 1 OS=Saccharomyces cerevisiae (strain ATCC 204508 / S288c) GN=TOP1 PE=1 SV=2	1	1	3	3	10	6.67824	2.06082	24.0802	7.76835	5.92291e-05	8.90197e-05	2.15843	0.987686	1	1	MUT - Control	limma	5.92291e-05	8.90197e-05	TRUE	enriched hit	6.67824
MRPL11	P36521	54S ribosomal protein L11, mitochondrial OS=Saccharomyces cerevisiae (strain ATCC 204508 / S288c) GN=MRPL11 PE=1 SV=2	1	1	3	3	2	6.07128	3.18998	22.1816	7.76171	5.95871e-05	8.93807e-05	2.15201	0.987697	1	1	MUT - Control	limma	5.95871e-05	8.93807e-05	TRUE	enriched hit	6.07128
YNG1	Q08465	Protein YNG1 OS=Saccharomyces cerevisiae (strain ATCC 204508 / S288c) GN=YNG1 PE=1 SV=1	1	1	3	3	4	5.93867	2.77561	22.0808	7.75936	5.97145e-05	8.93951e-05	2.14973	0.9877	1	1	MUT - Control	limma	5.97145e-05	8.93951e-05	TRUE	enriched hit	5.93867
RQC2	Q12532	Ribosome quality control complex subunit 2 OS=Saccharomyces cerevisiae (strain ATCC 204508 / S288c) GN=RQC2 PE=1 SV=1	1	1	3	3	3	5.53232	3.08867	20.8058	7.75189	6.01211e-05	8.98265e-05	2.14249	0.987712	1	1	MUT - Control	limma	6.01211e-05	8.98265e-05	TRUE	enriched hit	5.53232
ARP7	Q12406	Actin-related protein 7 OS=Saccharomyces cerevisiae (strain ATCC 204508 / S288c) GN=ARP7 PE=1 SV=1	1	1	3	3	3	6.07565	1.48959	23.1693	7.72585	6.15624e-05	9.17993e-05	2.11721	0.987754	1	1	MUT - Control	limma	6.15624e-05	9.17993e-05	TRUE	enriched hit	6.07565
VAC8	P39968	Vacuolar protein 8 OS=Saccharomyces cerevisiae (strain ATCC 204508 / S288c) GN=VAC8 PE=1 SV=3	1	1	3	3	2	5.91338	1.66612	21.508	7.71466	6.2194e-05	9.25592e-05	2.10632	0.987771	1	1	MUT - Control	limma	6.2194e-05	9.25592e-05	TRUE	enriched hit	5.91338
CHD1	P32657	Chromo domain-containing protein 1 OS=Saccharomyces cerevisiae (strain ATCC 204508 / S288c) GN=CHD1 PE=1 SV=1	1	1	3	3	13	6.65024	1.84986	24.0689	7.70395	6.28049e-05	9.32836e-05	2.09588	0.987788	1	1	MUT - Control	limma	6.28049e-05	9.32836e-05	TRUE	enriched hit	6.65024
SKO1	Q02100	CRE-binding bZIP protein SKO1 OS=Saccharomyces cerevisiae (strain ATCC 204508 / S288c) GN=SKO1 PE=1 SV=1	1	1	3	3	6	6.56523	3.2763	22.4691	7.70183	6.29265e-05	9.32836e-05	2.09382	0.987792	1	1	MUT - Control	limma	6.29265e-05	9.32836e-05	TRUE	enriched hit	6.56523
RPB5	P20434	DNA-directed RNA polymerases I, II, and III subunit RPABC1 OS=Saccharomyces cerevisiae (strain ATCC 204508 / S288c) GN=RPB5 PE=1 SV=1	1	1	3	3	2	6.01886	2.52165	22.8633	7.68686	6.37935e-05	9.43846e-05	2.07921	0.987815	1	1	MUT - Control	limma	6.37935e-05	9.43846e-05	TRUE	enriched hit	6.01886
HTA1|HTA2	P04911|P04912	Histone H2A.1 OS=Saccharomyces cerevisiae (strain ATCC 204508 / S288c) GN=HTA1 PE=1 SV=2|Histone H2A.2 OS=Saccharomyces cerevisiae (strain ATCC 204508 / S288c) GN=HTA2 PE=1 SV=2	1	1	3	3	4	7.63201	4.96076	25.0475	7.68339	6.3996e-05	9.44999e-05	2.07583	0.987821	1	1	MUT - Control	limma	6.3996e-05	9.44999e-05	TRUE	enriched hit	7.63201
NOP58	Q12499	Nucleolar protein 58 OS=Saccharomyces cerevisiae (strain ATCC 204508 / S288c) GN=NOP58 PE=1 SV=1	1	1	3	3	11	7.38254	2.18414	25.0139	7.66508	6.50785e-05	9.59118e-05	2.05793	0.98785	1	1	MUT - Control	limma	6.50785e-05	9.59118e-05	TRUE	enriched hit	7.38254
CDC3	P32457	Cell division control protein 3 OS=Saccharomyces cerevisiae (strain ATCC 204508 / S288c) GN=CDC3 PE=1 SV=3	1	1	3	3	4	5.9803	1.89528	21.5305	7.65814	6.54938e-05	9.63368e-05	2.05113	0.987861	1	1	MUT - Control	limma	6.54938e-05	9.63368e-05	TRUE	enriched hit	5.9803
OLE1	P21147	Acyl-CoA desaturase 1 OS=Saccharomyces cerevisiae (strain ATCC 204508 / S288c) GN=OLE1 PE=1 SV=2	1	1	3	3	4	6.2089	1.76133	21.4831	7.64773	6.61228e-05	9.69454e-05	2.04093	0.987877	1	1	MUT - Control	limma	6.61228e-05	9.69454e-05	TRUE	enriched hit	6.2089
TRP3	P00937	Multifunctional tryptophan biosynthesis protein OS=Saccharomyces cerevisiae (strain ATCC 204508 / S288c) GN=TRP3 PE=1 SV=2	1	1	3	3	2	5.64485	2.17118	21.0438	7.64707	6.6163e-05	9.69454e-05	2.04028	0.987878	1	1	MUT - Control	limma	6.6163e-05	9.69454e-05	TRUE	enriched hit	5.64485
SAS3	P34218	Histone acetyltransferase SAS3 OS=Saccharomyces cerevisiae (strain ATCC 204508 / S288c) GN=SAS3 PE=1 SV=1	1	1	3	3	7	6.98906	2.90897	22.3712	7.61582	6.80927e-05	9.95807e-05	2.00958	0.987928	1	1	MUT - Control	limma	6.80927e-05	9.95807e-05	TRUE	enriched hit	6.98906
RPL28	P02406	60S ribosomal protein L28 OS=Saccharomyces cerevisiae (strain ATCC 204508 / S288c) GN=RPL28 PE=1 SV=3	1	1	3	3	6	6.79309	3.15281	22.92	7.60072	6.90474e-05	0.000100783	1.99472	0.987952	1	1	MUT - Control	limma	6.90474e-05	0.000100783	TRUE	enriched hit	6.79309
FAA2	P39518	Long-chain-fatty-acid--CoA ligase 2 OS=Saccharomyces cerevisiae (strain ATCC 204508 / S288c) GN=FAA2 PE=1 SV=1	1	1	3	3	6	6.41657	2.6718	22.8038	7.59835	6.91985e-05	0.000100809	1.99238	0.987956	1	1	MUT - Control	limma	6.91985e-05	0.000100809	TRUE	enriched hit	6.41657
SAM1	P10659	S-adenosylmethionine synthase 1 OS=Saccharomyces cerevisiae (strain ATCC 204508 / S288c) GN=SAM1 PE=1 SV=2	1	1	3	3	2	6.39841	2.32424	21.7895	7.58606	6.99887e-05	0.000101765	1.98026	0.987975	1	1	MUT - Control	limma	6.99887e-05	0.000101765	TRUE	enriched hit	6.39841
HIR2	P32480	Protein HIR2 OS=Saccharomyces cerevisiae (strain ATCC 204508 / S288c) GN=HIR2 PE=1 SV=2	1	1	3	3	10	6.67783	2.53212	23.7108	7.57584	7.06533e-05	0.000102535	1.97016	0.987991	1	1	MUT - Control	limma	7.06533e-05	0.000102535	TRUE	enriched hit	6.67783
ARL1	P38116	ADP-ribosylation factor-like protein 1 OS=Saccharomyces cerevisiae (strain ATCC 204508 / S288c) GN=ARL1 PE=1 SV=4	1	1	3	3	2	5.64165	2.07317	20.8191	7.55892	7.17695e-05	0.000103956	1.95342	0.988018	1	1	MUT - Control	limma	7.17695e-05	0.000103956	TRUE	enriched hit	5.64165
RPT2	P40327	26S protease regulatory subunit 4 homolog OS=Saccharomyces cerevisiae (strain ATCC 204508 / S288c) GN=RPT2 PE=1 SV=3	1	1	3	3	4	6.16275	1.83329	22.8499	7.5492	7.24194e-05	0.000104698	1.94379	0.988034	1	1	MUT - Control	limma	7.24194e-05	0.000104698	TRUE	enriched hit	6.16275
SUB1	P54000	RNA polymerase II transcriptional coactivator SUB1 OS=Saccharomyces cerevisiae (strain ATCC 204508 / S288c) GN=SUB1 PE=1 SV=1	1	1	3	3	5	6.50128	2.29658	21.8463	7.54698	7.25687e-05	0.000104714	1.94159	0.988037	1	1	MUT - Control	limma	7.25687e-05	0.000104714	TRUE	enriched hit	6.50128
RTT106	P40161	Histone chaperone RTT106 OS=Saccharomyces cerevisiae (strain ATCC 204508 / S288c) GN=RTT106 PE=1 SV=1	1	1	3	3	8	7.06473	3.90036	23.034	7.49854	7.59139e-05	0.000109333	1.89344	0.988114	1	1	MUT - Control	limma	7.59139e-05	0.000109333	TRUE	enriched hit	7.06473
PBP1	P53297	PAB1-binding protein 1 OS=Saccharomyces cerevisiae (strain ATCC 204508 / S288c) GN=PBP1 PE=1 SV=1	1	1	3	3	3	5.92016	1.73402	22.4885	7.49618	7.60814e-05	0.000109367	1.89108	0.988118	1	1	MUT - Control	limma	7.60814e-05	0.000109367	TRUE	enriched hit	5.92016
PMT2	P31382	Dolichyl-phosphate-mannose--protein mannosyltransferase 2 OS=Saccharomyces cerevisiae (strain ATCC 204508 / S288c) GN=PMT2 PE=1 SV=2	1	1	3	3	2	6.45829	1.50344	22.228	7.49048	7.64872e-05	0.000109742	1.8854	0.988127	1	1	MUT - Control	limma	7.64872e-05	0.000109742	TRUE	enriched hit	6.45829
THO1	P40040	Protein THO1 OS=Saccharomyces cerevisiae (strain ATCC 204508 / S288c) GN=THO1 PE=1 SV=1	1	1	3	3	4	6.26589	1.45457	22.3019	7.48675	7.67538e-05	0.000109917	1.88168	0.988133	1	1	MUT - Control	limma	7.67538e-05	0.000109917	TRUE	enriched hit	6.26589
CRP1	P38845	Cruciform DNA-recognizing protein 1 OS=Saccharomyces cerevisiae (strain ATCC 204508 / S288c) GN=CRP1 PE=1 SV=1	1	1	3	3	4	6.32746	2.67032	22.0423	7.43689	8.04219e-05	0.000114953	1.83179	0.988212	1	1	MUT - Control	limma	8.04219e-05	0.000114953	TRUE	enriched hit	6.32746
EPL1	P43572	Enhancer of polycomb-like protein 1 OS=Saccharomyces cerevisiae (strain ATCC 204508 / S288c) GN=EPL1 PE=1 SV=1	1	1	3	3	5	5.78083	1.98323	21.9016	7.43379	8.06567e-05	0.000115072	1.82867	0.988217	1	1	MUT - Control	limma	8.06567e-05	0.000115072	TRUE	enriched hit	5.78083
DBP5	P20449	ATP-dependent RNA helicase DBP5 OS=Saccharomyces cerevisiae (strain ATCC 204508 / S288c) GN=DBP5 PE=1 SV=2	1	1	3	3	5	6.23072	2.71973	22.7382	7.42684	8.11852e-05	0.000115609	1.82169	0.988228	1	1	MUT - Control	limma	8.11852e-05	0.000115609	TRUE	enriched hit	6.23072
RPS6A|RPS6B	P0CX37|P0CX38	40S ribosomal protein S6-A OS=Saccharomyces cerevisiae (strain ATCC 204508 / S288c) GN=RPS6A PE=1 SV=1|40S ribosomal protein S6-B OS=Saccharomyces cerevisiae (strain ATCC 204508 / S288c) GN=RPS6B PE=1 SV=1	1	1	3	3	9	8.28255	2.68683	24.8011	7.41343	8.22156e-05	0.000116857	1.80821	0.988249	1	1	MUT - Control	limma	8.22156e-05	0.000116857	TRUE	enriched hit	8.28255
RSF1	Q05043	Respiration factor 1 OS=Saccharomyces cerevisiae (strain ATCC 204508 / S288c) GN=RSF1 PE=1 SV=1	1	1	3	3	2	5.86691	2.69611	21.5649	7.3937	8.37579e-05	0.000118827	1.78834	0.98828	1	1	MUT - Control	limma	8.37579e-05	0.000118827	TRUE	enriched hit	5.86691
SPT15	P13393	TATA-box-binding protein OS=Saccharomyces cerevisiae (strain ATCC 204508 / S288c) GN=SPT15 PE=1 SV=3	1	1	3	3	4	6.90122	2.14187	22.3717	7.37525	8.52291e-05	0.000120688	1.76972	0.988309	1	1	MUT - Control	limma	8.52291e-05	0.000120688	TRUE	enriched hit	6.90122
SPO22	P40511	Sporulation-specific protein 22 OS=Saccharomyces cerevisiae (strain ATCC 204508 / S288c) GN=SPO22 PE=3 SV=2	1	1	3	3	2	5.88453	1.87999	21.3495	7.34688	8.75481e-05	0.000123741	1.74102	0.988354	1	1	MUT - Control	limma	8.75481e-05	0.000123741	TRUE	enriched hit	5.88453
RPB2	P08518	DNA-directed RNA polymerase II subunit RPB2 OS=Saccharomyces cerevisiae (strain ATCC 204508 / S288c) GN=RPB2 PE=1 SV=2	1	1	3	3	20	7.18273	2.17249	25.4042	7.3406	8.80714e-05	0.000124249	1.73464	0.988364	1	1	MUT - Control	limma	8.80714e-05	0.000124249	TRUE	enriched hit	7.18273
RAD51	P25454	DNA repair protein RAD51 OS=Saccharomyces cerevisiae (strain ATCC 204508 / S288c) GN=RAD51 PE=1 SV=1	1	1	3	3	2	6.06753	1.50399	20.7716	7.31454	9.02776e-05	0.000127126	1.70818	0.988406	1	1	MUT - Control	limma	9.02776e-05	0.000127126	TRUE	enriched hit	6.06753
HSV2	P50079	SVP1-like protein 2 OS=Saccharomyces cerevisiae (strain ATCC 204508 / S288c) GN=HSV2 PE=1 SV=1	1	1	3	3	4	6.14961	1.43037	22.3996	7.30312	9.12638e-05	0.000128276	1.69656	0.988424	1	1	MUT - Control	limma	9.12638e-05	0.000128276	TRUE	enriched hit	6.14961
RPO21	P04050	DNA-directed RNA polymerase II subunit RPB1 OS=Saccharomyces cerevisiae (strain ATCC 204508 / S288c) GN=RPO21 PE=1 SV=2	1	1	3	3	29	7.23095	2.6594	25.8456	7.2923	9.22098e-05	0.000129366	1.68553	0.988441	1	1	MUT - Control	limma	9.22098e-05	0.000129366	TRUE	enriched hit	7.23095
RPL18A|RPL18B	P0CX49|P0CX50	60S ribosomal protein L18-A OS=Saccharomyces cerevisiae (strain ATCC 204508 / S288c) GN=RPL18A PE=1 SV=1|60S ribosomal protein L18-B OS=Saccharomyces cerevisiae (strain ATCC 204508 / S288c) GN=RPL18B PE=1 SV=1	1	1	3	3	10	8.41736	3.45943	26.1404	7.28455	9.28938e-05	0.000129952	1.67762	0.988453	1	1	MUT - Control	limma	9.28938e-05	0.000129952	TRUE	enriched hit	8.41736
HTB2	P02294	Histone H2B.2 OS=Saccharomyces cerevisiae (strain ATCC 204508 / S288c) GN=HTB2 PE=1 SV=2	1	1	3	3	2	7.46246	3.14876	24.6957	7.28369	9.29694e-05	0.000129952	1.67675	0.988454	1	1	MUT - Control	limma	9.29694e-05	0.000129952	TRUE	enriched hit	7.46246
P1707_RE|RTN1	P1707_RE|Q04947	|Reticulon-like protein 1 OS=Saccharomyces cerevisiae (strain ATCC 204508 / S288c) GN=RTN1 PE=1 SV=1	1	1	3	3	2	6.13224	1.7119	22.0585	7.26977	9.42137e-05	0.000131449	1.66253	0.988476	1	1	MUT - Control	limma	9.42137e-05	0.000131449	TRUE	enriched hit	6.13224
SDH1	Q00711	Succinate dehydrogenase [ubiquinone] flavoprotein subunit, mitochondrial OS=Saccharomyces cerevisiae (strain ATCC 204508 / S288c) GN=SDH1 PE=1 SV=1	1	1	3	3	11	7.12895	2.13544	25.3599	7.26661	9.44986e-05	0.000131604	1.6593	0.988481	1	1	MUT - Control	limma	9.44986e-05	0.000131604	TRUE	enriched hit	7.12895
REP2	P03872	Partitioning protein REP2 OS=Saccharomyces cerevisiae (strain ATCC 204508 / S288c) GN=REP2 PE=1 SV=1	1	1	3	3	2	5.60068	1.9228	19.8659	7.2526	9.57732e-05	0.000133135	1.64497	0.988504	1	1	MUT - Control	limma	9.57732e-05	0.000133135	TRUE	enriched hit	5.60068
RPL37A	P49166	60S ribosomal protein L37-A OS=Saccharomyces cerevisiae (strain ATCC 204508 / S288c) GN=RPL37A PE=1 SV=2	1	1	3	3	2	6.64721	3.00604	21.6258	7.24655	9.63296e-05	0.000133664	1.63877	0.988513	1	1	MUT - Control	limma	9.63296e-05	0.000133664	TRUE	enriched hit	6.64721
ADH1	P00330	Alcohol dehydrogenase 1 OS=Saccharomyces cerevisiae (strain ATCC 204508 / S288c) GN=ADH1 PE=1 SV=5	1	1	3	3	8	7.09732	1.38859	24.4188	7.23265	9.76216e-05	0.00013521	1.62451	0.988535	1	1	MUT - Control	limma	9.76216e-05	0.00013521	TRUE	enriched hit	7.09732
RPS17A|RPS17B	P02407|P14127	40S ribosomal protein S17-A OS=Saccharomyces cerevisiae (strain ATCC 204508 / S288c) GN=RPS17A PE=1 SV=1|40S ribosomal protein S17-B OS=Saccharomyces cerevisiae (strain ATCC 204508 / S288c) GN=RPS17B PE=1 SV=1	1	1	3	3	3	5.91371	2.56817	21.3489	7.21428	9.93593e-05	0.000137366	1.60563	0.988564	1	1	MUT - Control	limma	9.93593e-05	0.000137366	TRUE	enriched hit	5.91371
RAD16	P31244	DNA repair protein RAD16 OS=Saccharomyces cerevisiae (strain ATCC 204508 / S288c) GN=RAD16 PE=1 SV=1	1	1	3	3	4	5.70823	1.64089	22.0705	7.21052	9.97187e-05	0.000137612	1.60177	0.98857	1	1	MUT - Control	limma	9.97187e-05	0.000137612	TRUE	enriched hit	5.70823
MRPL36	P36531	54S ribosomal protein L36, mitochondrial OS=Saccharomyces cerevisiae (strain ATCC 204508 / S288c) GN=MRPL36 PE=1 SV=3	1	1	3	3	2	5.91631	1.92074	20.7086	7.17587	0.000103103	0.000141766	1.56605	0.988625	1	1	MUT - Control	limma	0.000103103	0.000141766	TRUE	enriched hit	5.91631
RPL24B	P24000	60S ribosomal protein L24-B OS=Saccharomyces cerevisiae (strain ATCC 204508 / S288c) GN=RPL24B PE=1 SV=1	1	1	3	3	2	6.54704	1.98746	24.1724	7.17306	0.000103383	0.000141894	1.56315	0.98863	1	1	MUT - Control	limma	0.000103383	0.000141894	TRUE	enriched hit	6.54704
RPL8A	P17076	60S ribosomal protein L8-A OS=Saccharomyces cerevisiae (strain ATCC 204508 / S288c) GN=RPL8A PE=1 SV=4	1	1	3	3	2	6.81874	2.86899	21.9945	7.16077	0.000104618	0.00014333	1.55044	0.988649	1	1	MUT - Control	limma	0.000104618	0.00014333	TRUE	enriched hit	6.81874
SDS24	P38314	Protein SDS24 OS=Saccharomyces cerevisiae (strain ATCC 204508 / S288c) GN=SDS24 PE=1 SV=1	1	1	3	3	2	6.22655	1.48115	21.7307	7.14897	0.000105819	0.000144714	1.53822	0.988668	1	1	MUT - Control	limma	0.000105819	0.000144714	TRUE	enriched hit	6.22655
RPL24A	P04449	60S ribosomal protein L24-A OS=Saccharomyces cerevisiae (strain ATCC 204508 / S288c) GN=RPL24A PE=1 SV=1	1	1	3	3	2	6.50297	2.49727	21.6738	7.138	0.000106948	0.000145887	1.52686	0.988685	1	1	MUT - Control	limma	0.000106948	0.000145887	TRUE	enriched hit	6.50297
RPL19A|RPL19B	P0CX82|P0CX83	60S ribosomal protein L19-A OS=Saccharomyces cerevisiae (strain ATCC 204508 / S288c) GN=RPL19A PE=1 SV=1|60S ribosomal protein L19-B OS=Saccharomyces cerevisiae (strain ATCC 204508 / S288c) GN=RPL19B PE=1 SV=1	1	1	3	3	6	7.55915	3.92033	24.2108	7.13692	0.000107061	0.000145887	1.52573	0.988687	1	1	MUT - Control	limma	0.000107061	0.000145887	TRUE	enriched hit	7.55915
PGK1	P00560	Phosphoglycerate kinase OS=Saccharomyces cerevisiae (strain ATCC 204508 / S288c) GN=PGK1 PE=1 SV=2	1	1	3	3	14	7.034	1.43512	25.5524	7.08816	0.000112255	0.000152418	1.47501	0.988764	1	1	MUT - Control	limma	0.000112255	0.000152418	TRUE	enriched hit	7.034
POR1	P04840	Mitochondrial outer membrane protein porin 1 OS=Saccharomyces cerevisiae (strain ATCC 204508 / S288c) GN=POR1 PE=1 SV=4	1	1	3	3	6	6.91363	2.77936	24.1238	7.07592	0.000113602	0.000153971	1.46224	0.988784	1	1	MUT - Control	limma	0.000113602	0.000153971	TRUE	enriched hit	6.91363
CST6	P40535	ATF/CREB activator 2 OS=Saccharomyces cerevisiae (strain ATCC 204508 / S288c) GN=CST6 PE=1 SV=1	1	1	3	3	3	6.27089	2.00889	22.7298	7.05431	0.000116025	0.000156975	1.43964	0.988818	1	1	MUT - Control	limma	0.000116025	0.000156975	TRUE	enriched hit	6.27089
FRS2	P15625	Phenylalanine--tRNA ligase alpha subunit OS=Saccharomyces cerevisiae (strain ATCC 204508 / S288c) GN=FRS2 PE=1 SV=3	1	1	3	3	4	5.86074	1.83501	22.1604	7.04992	0.000116524	0.000157369	1.43505	0.988825	1	1	MUT - Control	limma	0.000116524	0.000157369	TRUE	enriched hit	5.86074
RET2	P43621	Coatomer subunit delta OS=Saccharomyces cerevisiae (strain ATCC 204508 / S288c) GN=RET2 PE=1 SV=3	1	1	3	3	2	5.82201	1.90161	20.656	7.03666	0.000118046	0.000159142	1.42114	0.988846	1	1	MUT - Control	limma	0.000118046	0.000159142	TRUE	enriched hit	5.82201
RGI1	P40043	Respiratory growth induced protein 1 OS=Saccharomyces cerevisiae (strain ATCC 204508 / S288c) GN=RGI1 PE=1 SV=1	1	1	3	3	2	6.68889	1.80866	21.4116	7.03431	0.000118318	0.000159226	1.41867	0.98885	1	1	MUT - Control	limma	0.000118318	0.000159226	TRUE	enriched hit	6.68889
PIP2	P52960	Peroxisome proliferation transcriptional regulator OS=Saccharomyces cerevisiae (strain ATCC 204508 / S288c) GN=PIP2 PE=1 SV=1	1	1	3	3	2	5.4182	2.11161	20.9458	7.02228	0.000119722	0.00016083	1.40605	0.988869	1	1	MUT - Control	limma	0.000119722	0.00016083	TRUE	enriched hit	5.4182
RPL32	P38061	60S ribosomal protein L32 OS=Saccharomyces cerevisiae (strain ATCC 204508 / S288c) GN=RPL32 PE=1 SV=1	1	1	3	3	8	7.94422	3.86238	25.3569	6.99303	0.000123213	0.00016514	1.37526	0.988915	1	1	MUT - Control	limma	0.000123213	0.00016514	TRUE	enriched hit	7.94422
RPH1	P39956	DNA damage-responsive transcriptional repressor RPH1 OS=Saccharomyces cerevisiae (strain ATCC 204508 / S288c) GN=RPH1 PE=1 SV=1	1	1	3	3	2	5.79441	2.83337	20.3343	6.99106	0.000123451	0.00016514	1.37319	0.988918	1	1	MUT - Control	limma	0.000123451	0.00016514	TRUE	enriched hit	5.79441
CHC1	P22137	Clathrin heavy chain OS=Saccharomyces cerevisiae (strain ATCC 204508 / S288c) GN=CHC1 PE=1 SV=1	1	1	3	3	4	5.91362	2.53909	22.1025	6.98998	0.000123583	0.00016514	1.37205	0.98892	1	1	MUT - Control	limma	0.000123583	0.00016514	TRUE	enriched hit	5.91362
YNR021W	P53723	UPF0674 endoplasmic reticulum membrane protein YNR021W OS=Saccharomyces cerevisiae (strain ATCC 204508 / S288c) GN=YNR021W PE=1 SV=3	1	1	3	3	2	5.96513	2.009	22.3422	6.9881	0.000123812	0.000165155	1.37006	0.988923	1	1	MUT - Control	limma	0.000123812	0.000165155	TRUE	enriched hit	5.96513
BDP1	P46678	Transcription factor TFIIIB component B'' OS=Saccharomyces cerevisiae (strain ATCC 204508 / S288c) GN=BDP1 PE=1 SV=1	1	1	3	3	12	7.40508	3.02976	24.1458	6.97524	0.000125391	0.000166968	1.35649	0.988943	1	1	MUT - Control	limma	0.000125391	0.000166968	TRUE	enriched hit	7.40508
MDH3	P32419	Malate dehydrogenase, peroxisomal OS=Saccharomyces cerevisiae (strain ATCC 204508 / S288c) GN=MDH3 PE=1 SV=3	1	1	3	3	6	6.82224	2.98304	23.6133	6.95732	0.000127628	0.000169649	1.33755	0.988972	1	1	MUT - Control	limma	0.000127628	0.000169649	TRUE	enriched hit	6.82224
[truncated: 947 more rows]
