# Supplementary figures and images for: Novel mechanistic insights into the role of Mer2 as the keystone of meiotic DNA break formation
Source: eLife journal article supplement (doi:10.7554/elife.72330), 2021-12-24

# PCA clustering data

PC3 – explaining 0 % of variability

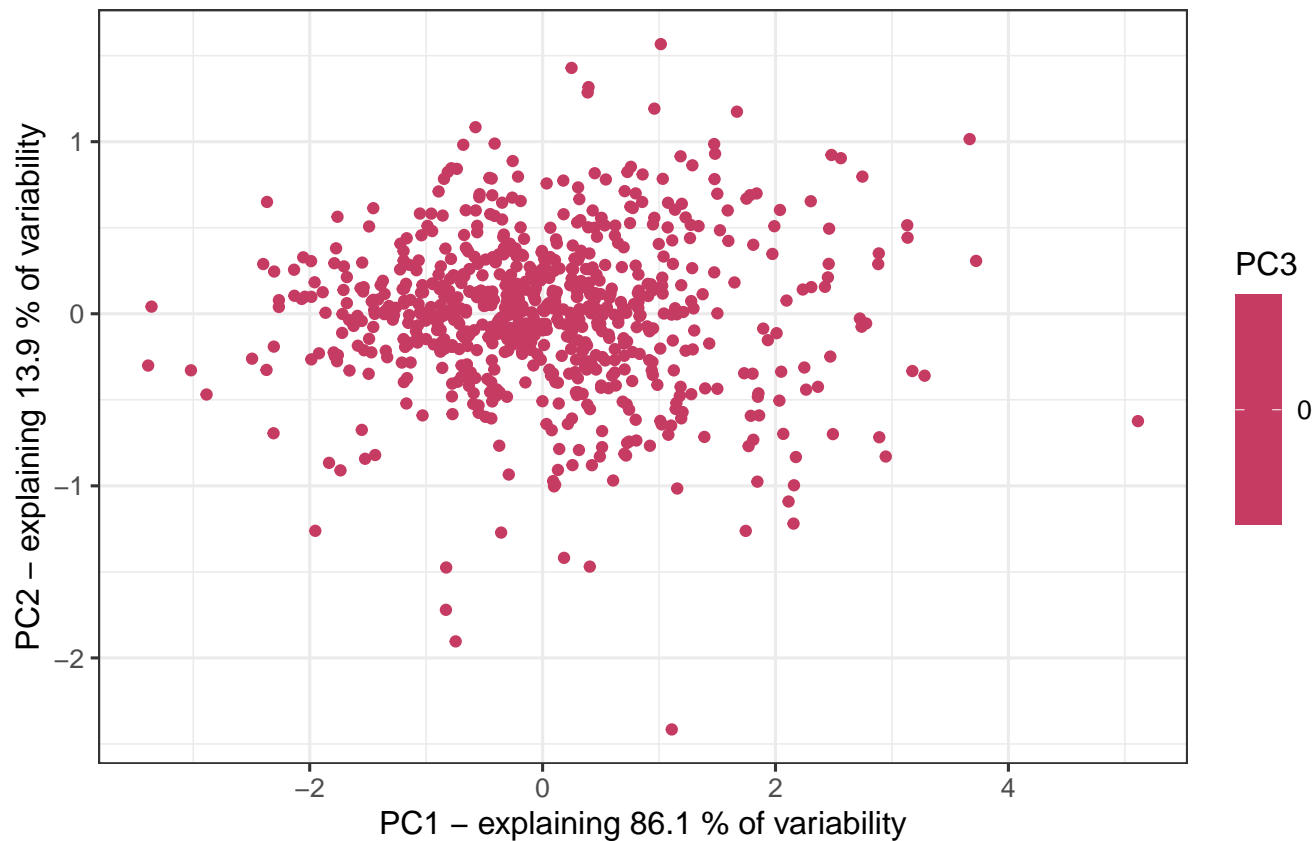

Supplement: data2 [file elife-72330-data2-v2.zip]

norm\_batchcl\_raw\_data

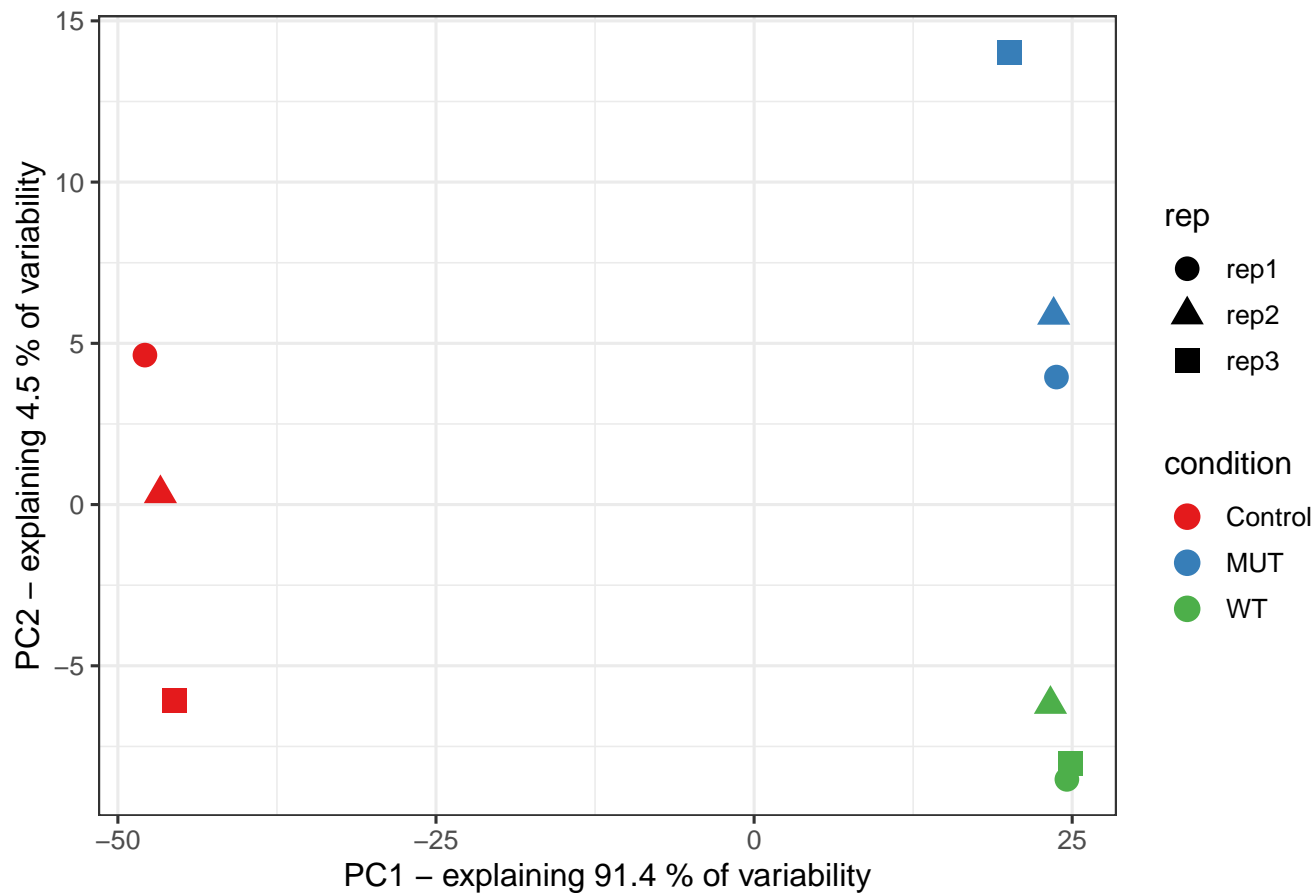

Supplement: data2 [file elife-72330-data2-v2.zip]

hierarchical clustering

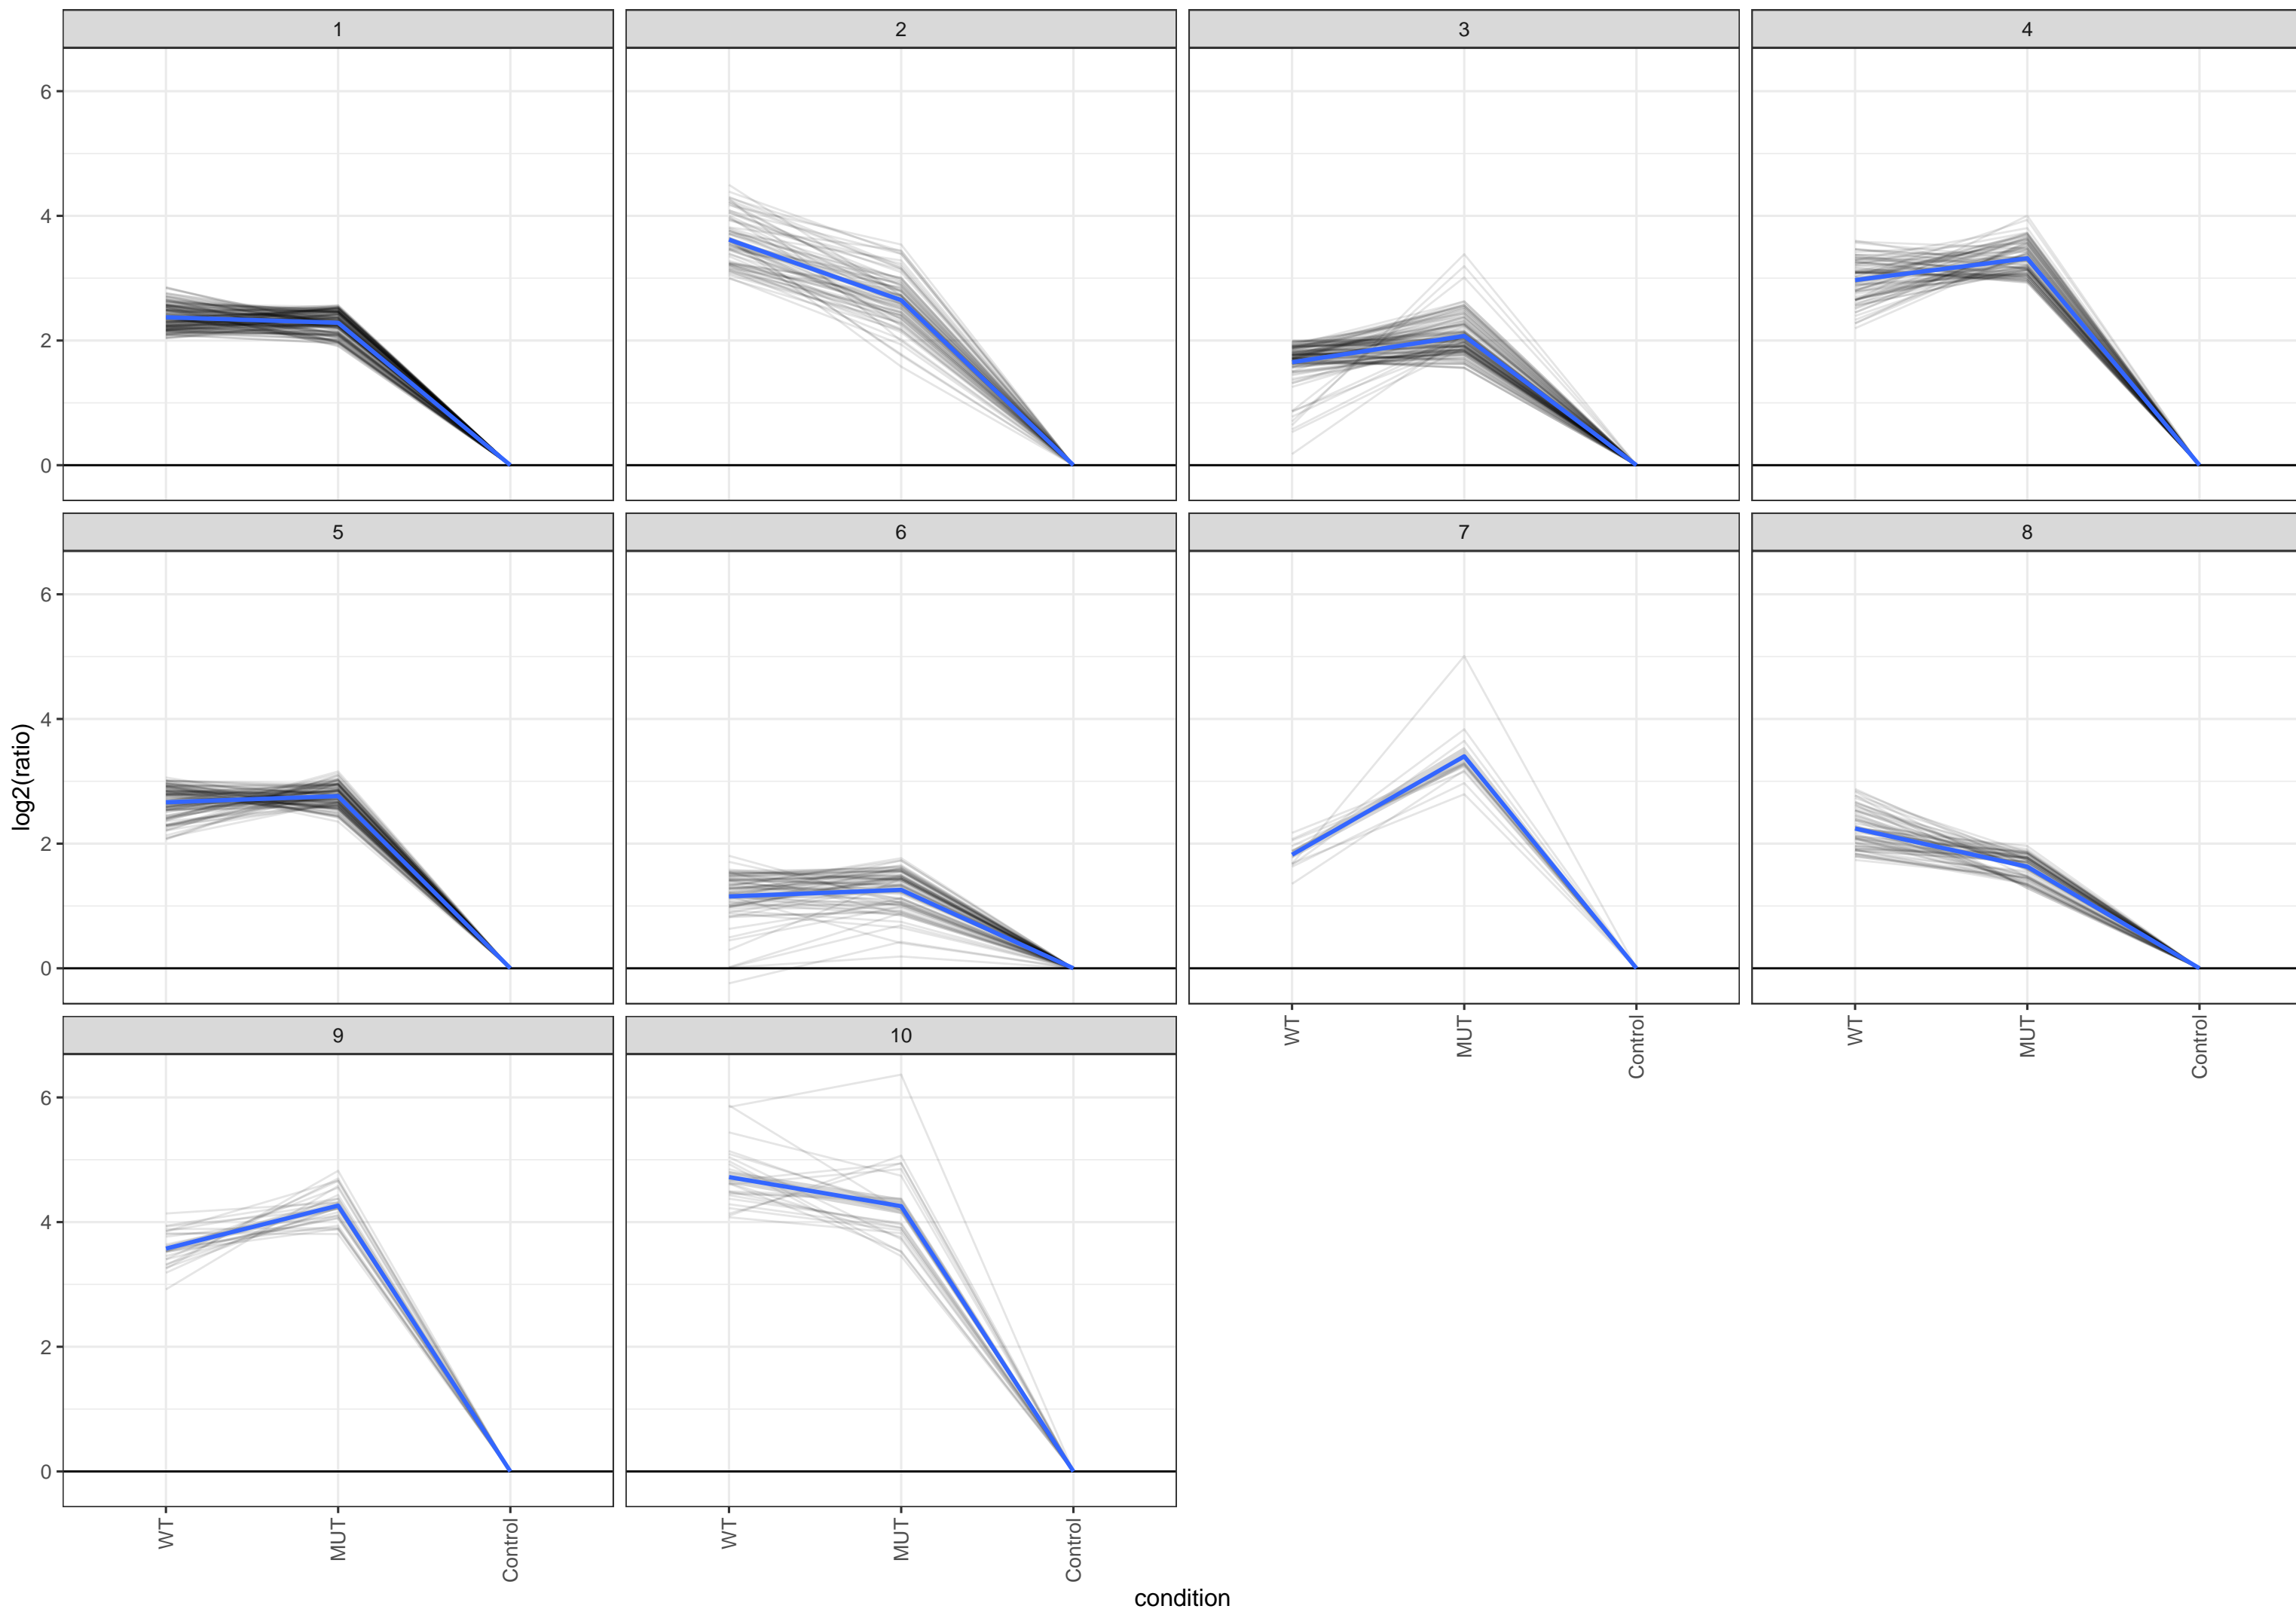

Supplement: data2 [file elife-72330-data2-v2.zip]

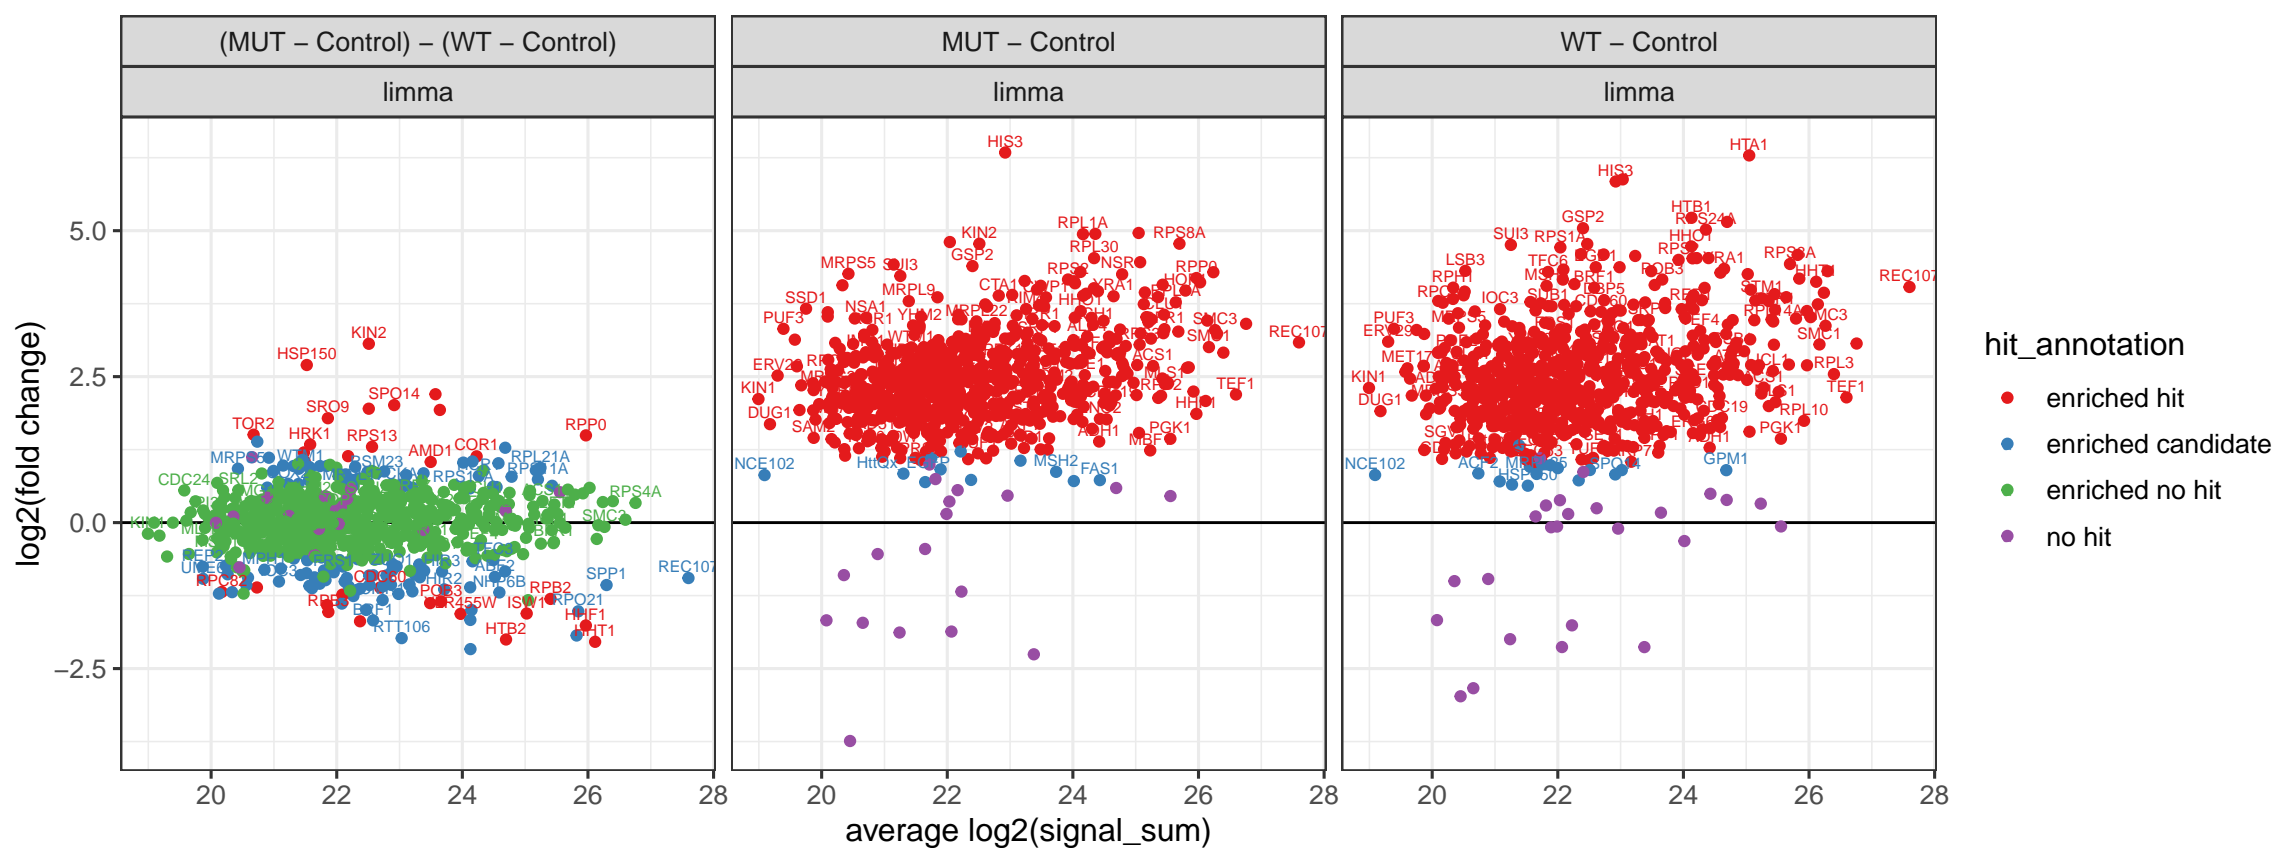

Supplement: data2 [file elife-72330-data2-v2.zip]

raw\_data

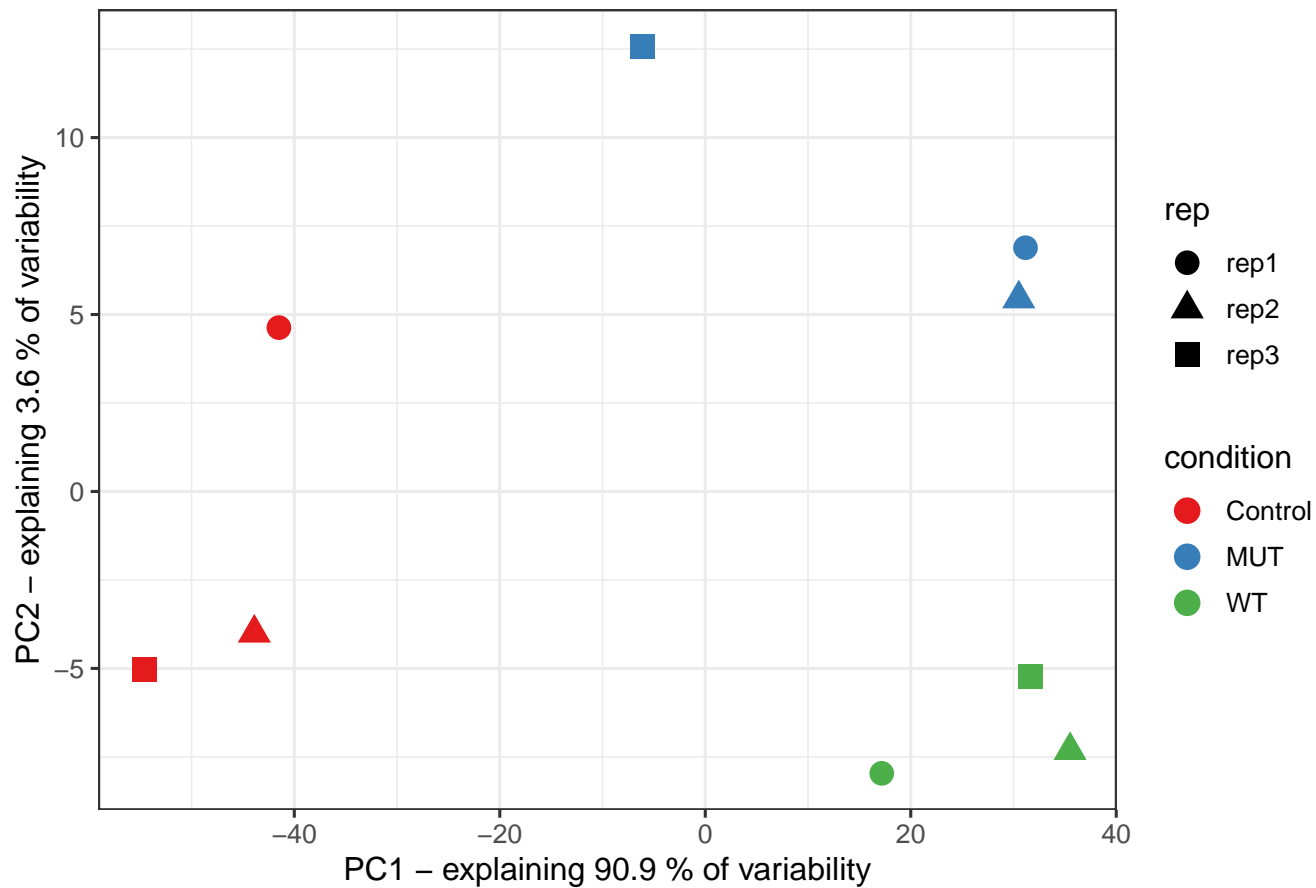

Supplement: data2 [file elife-72330-data2-v2.zip]

gene

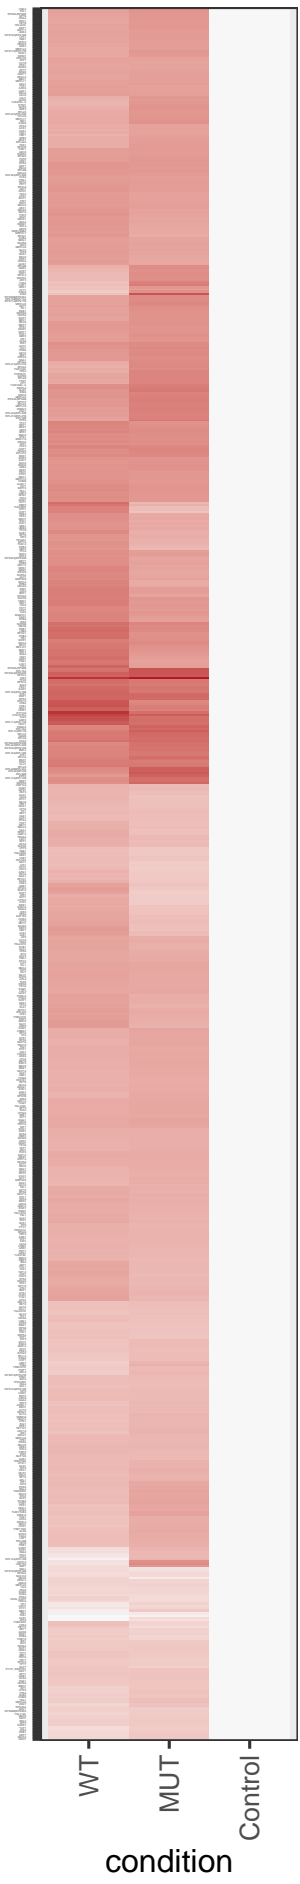

log2.ratio

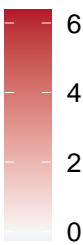

Supplement: data2 [file elife-72330-data2-v2.zip]

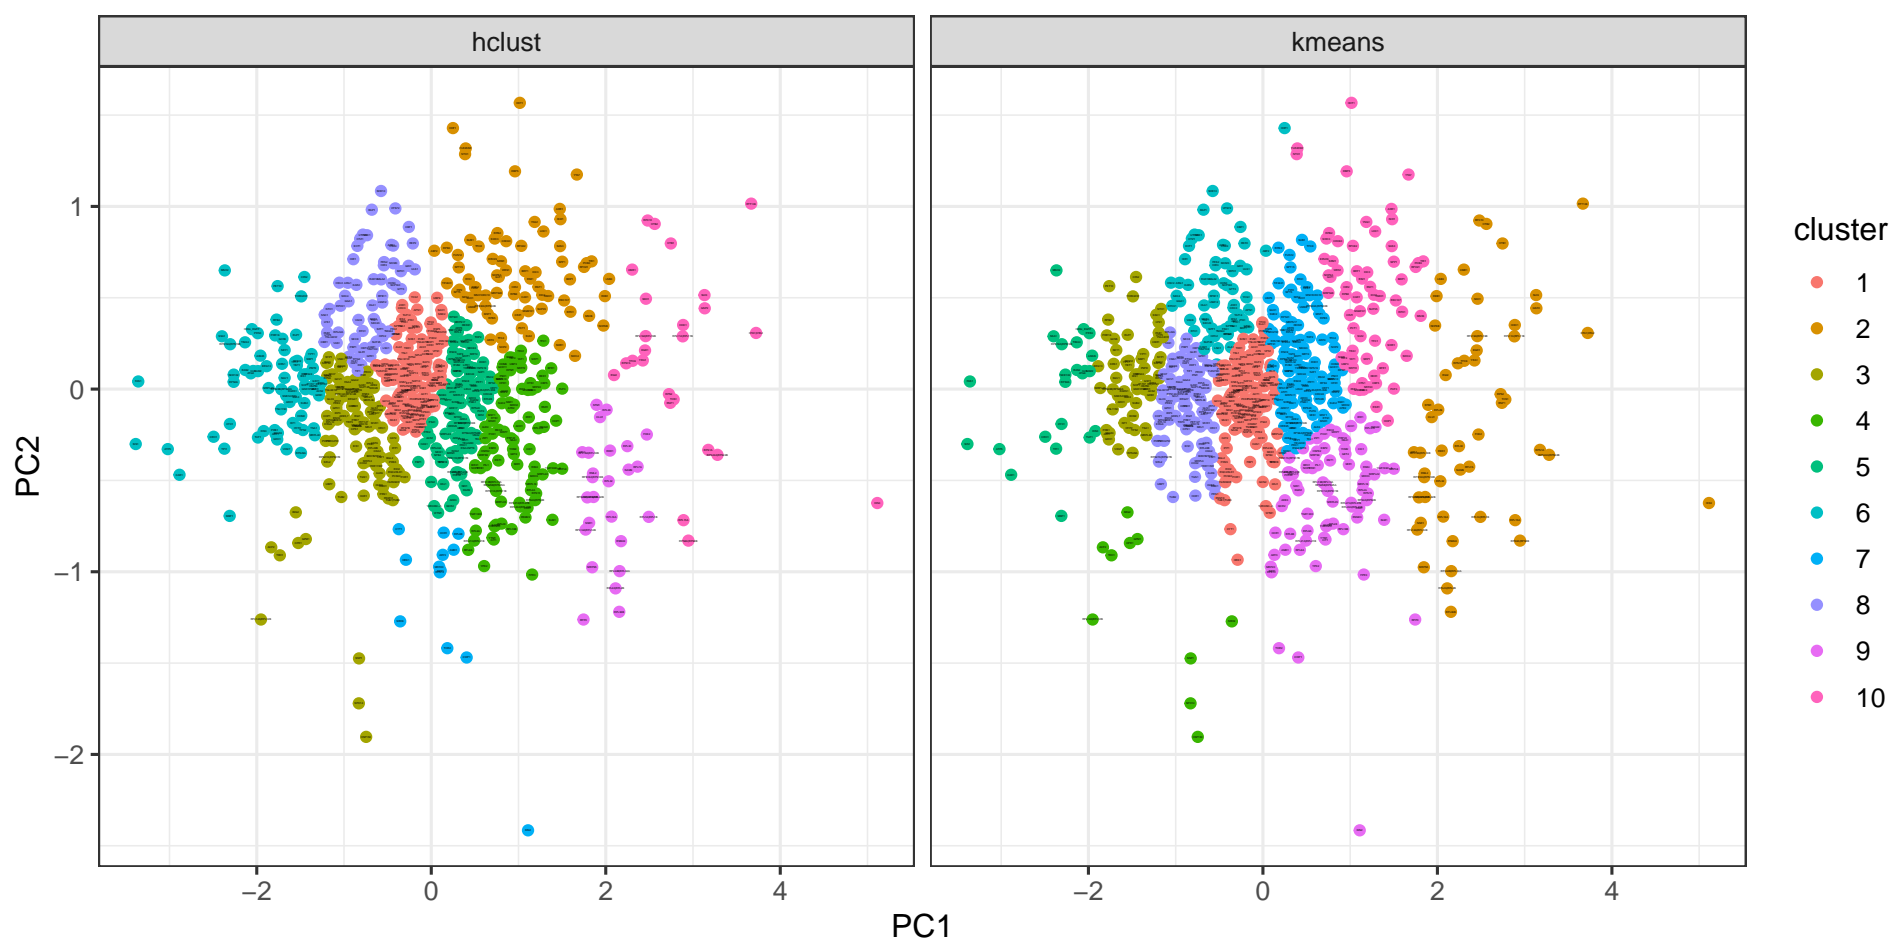

Supplement: data2 [file elife-72330-data2-v2.zip]

batchcl\_raw\_data

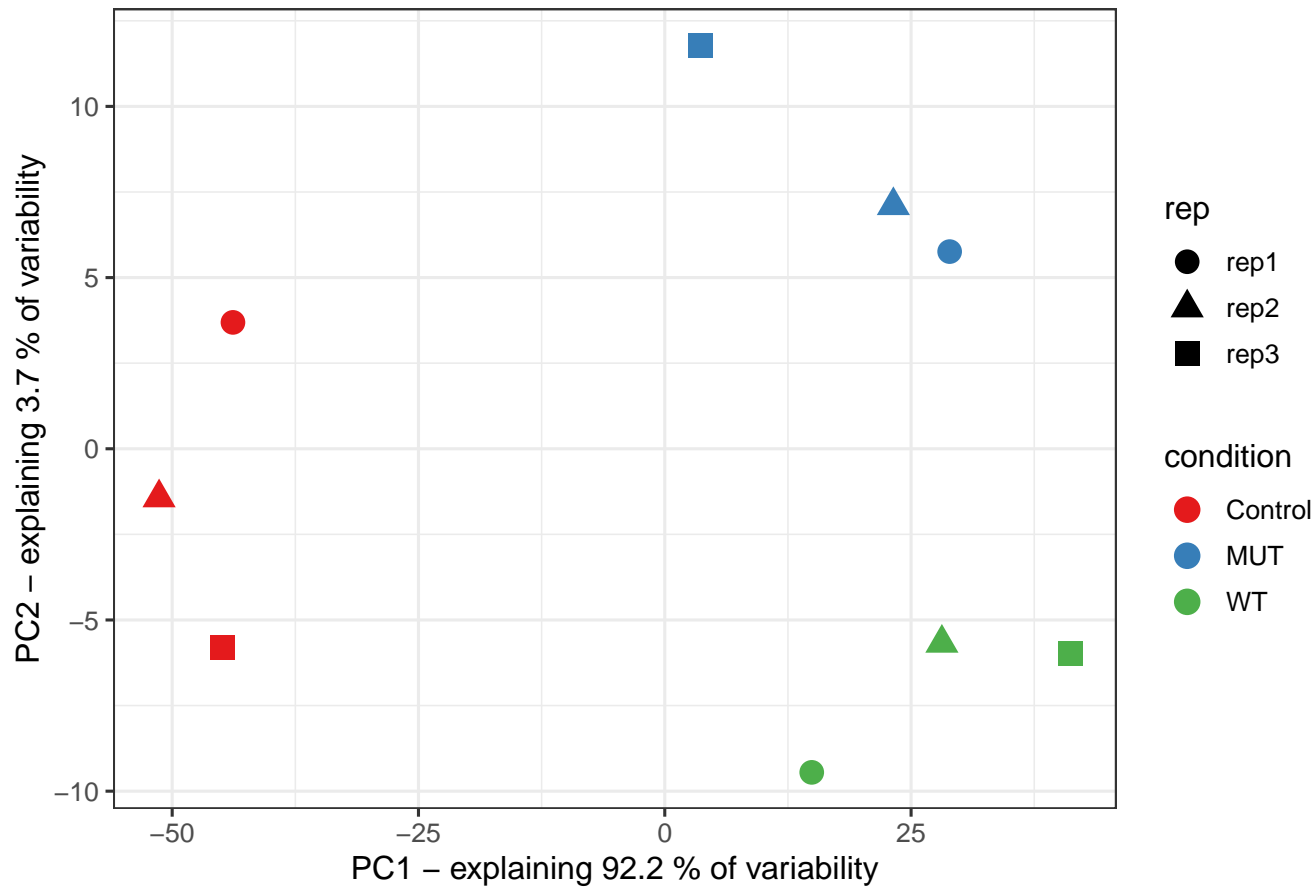

Supplement: data2 [file elife-72330-data2-v2.zip]

ctrl.ratio\_data

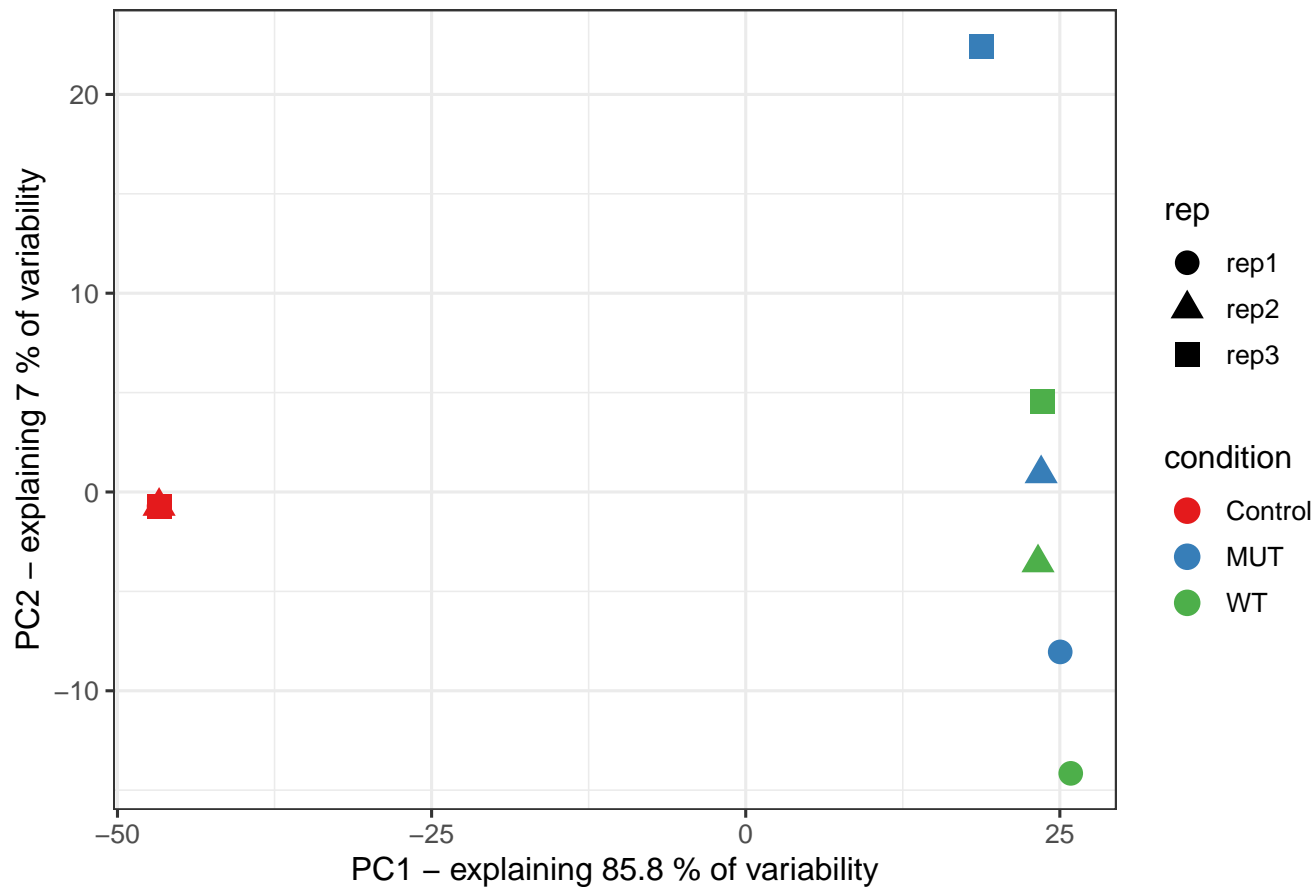

Supplement: data2 [file elife-72330-data2-v2.zip]

**Rousova et al. paper 2021**

**Figures with unedited blots:**


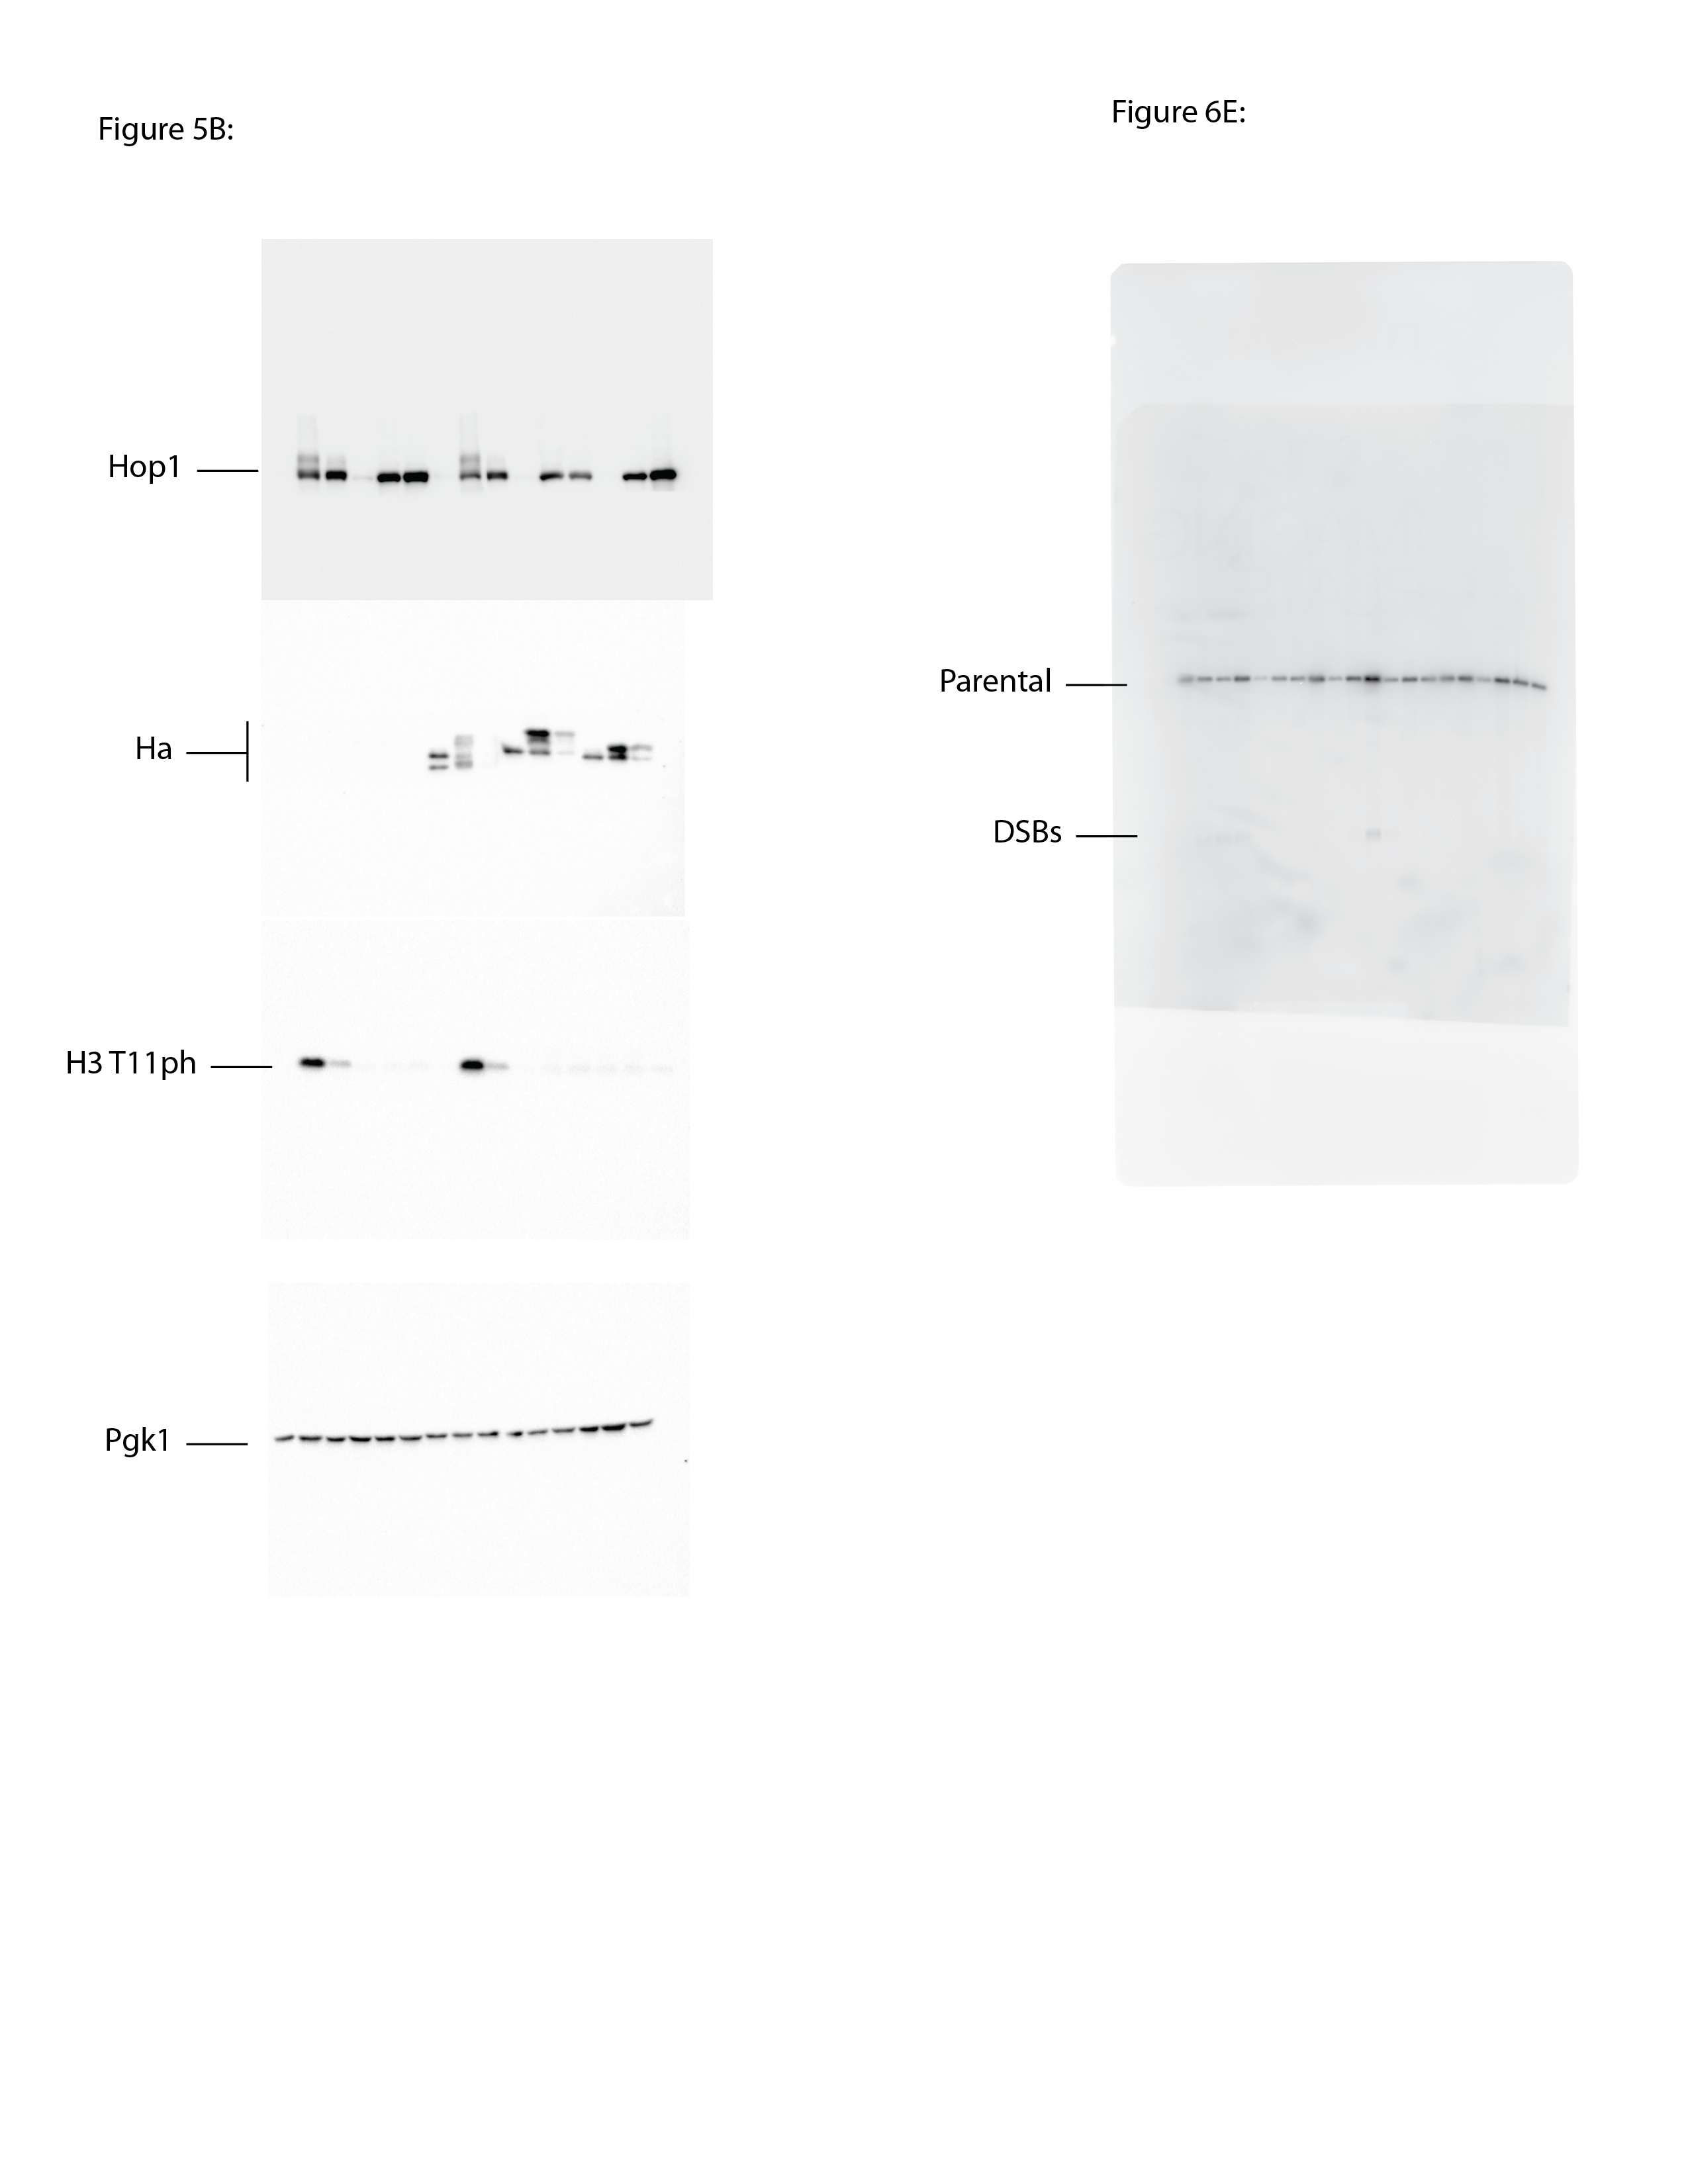


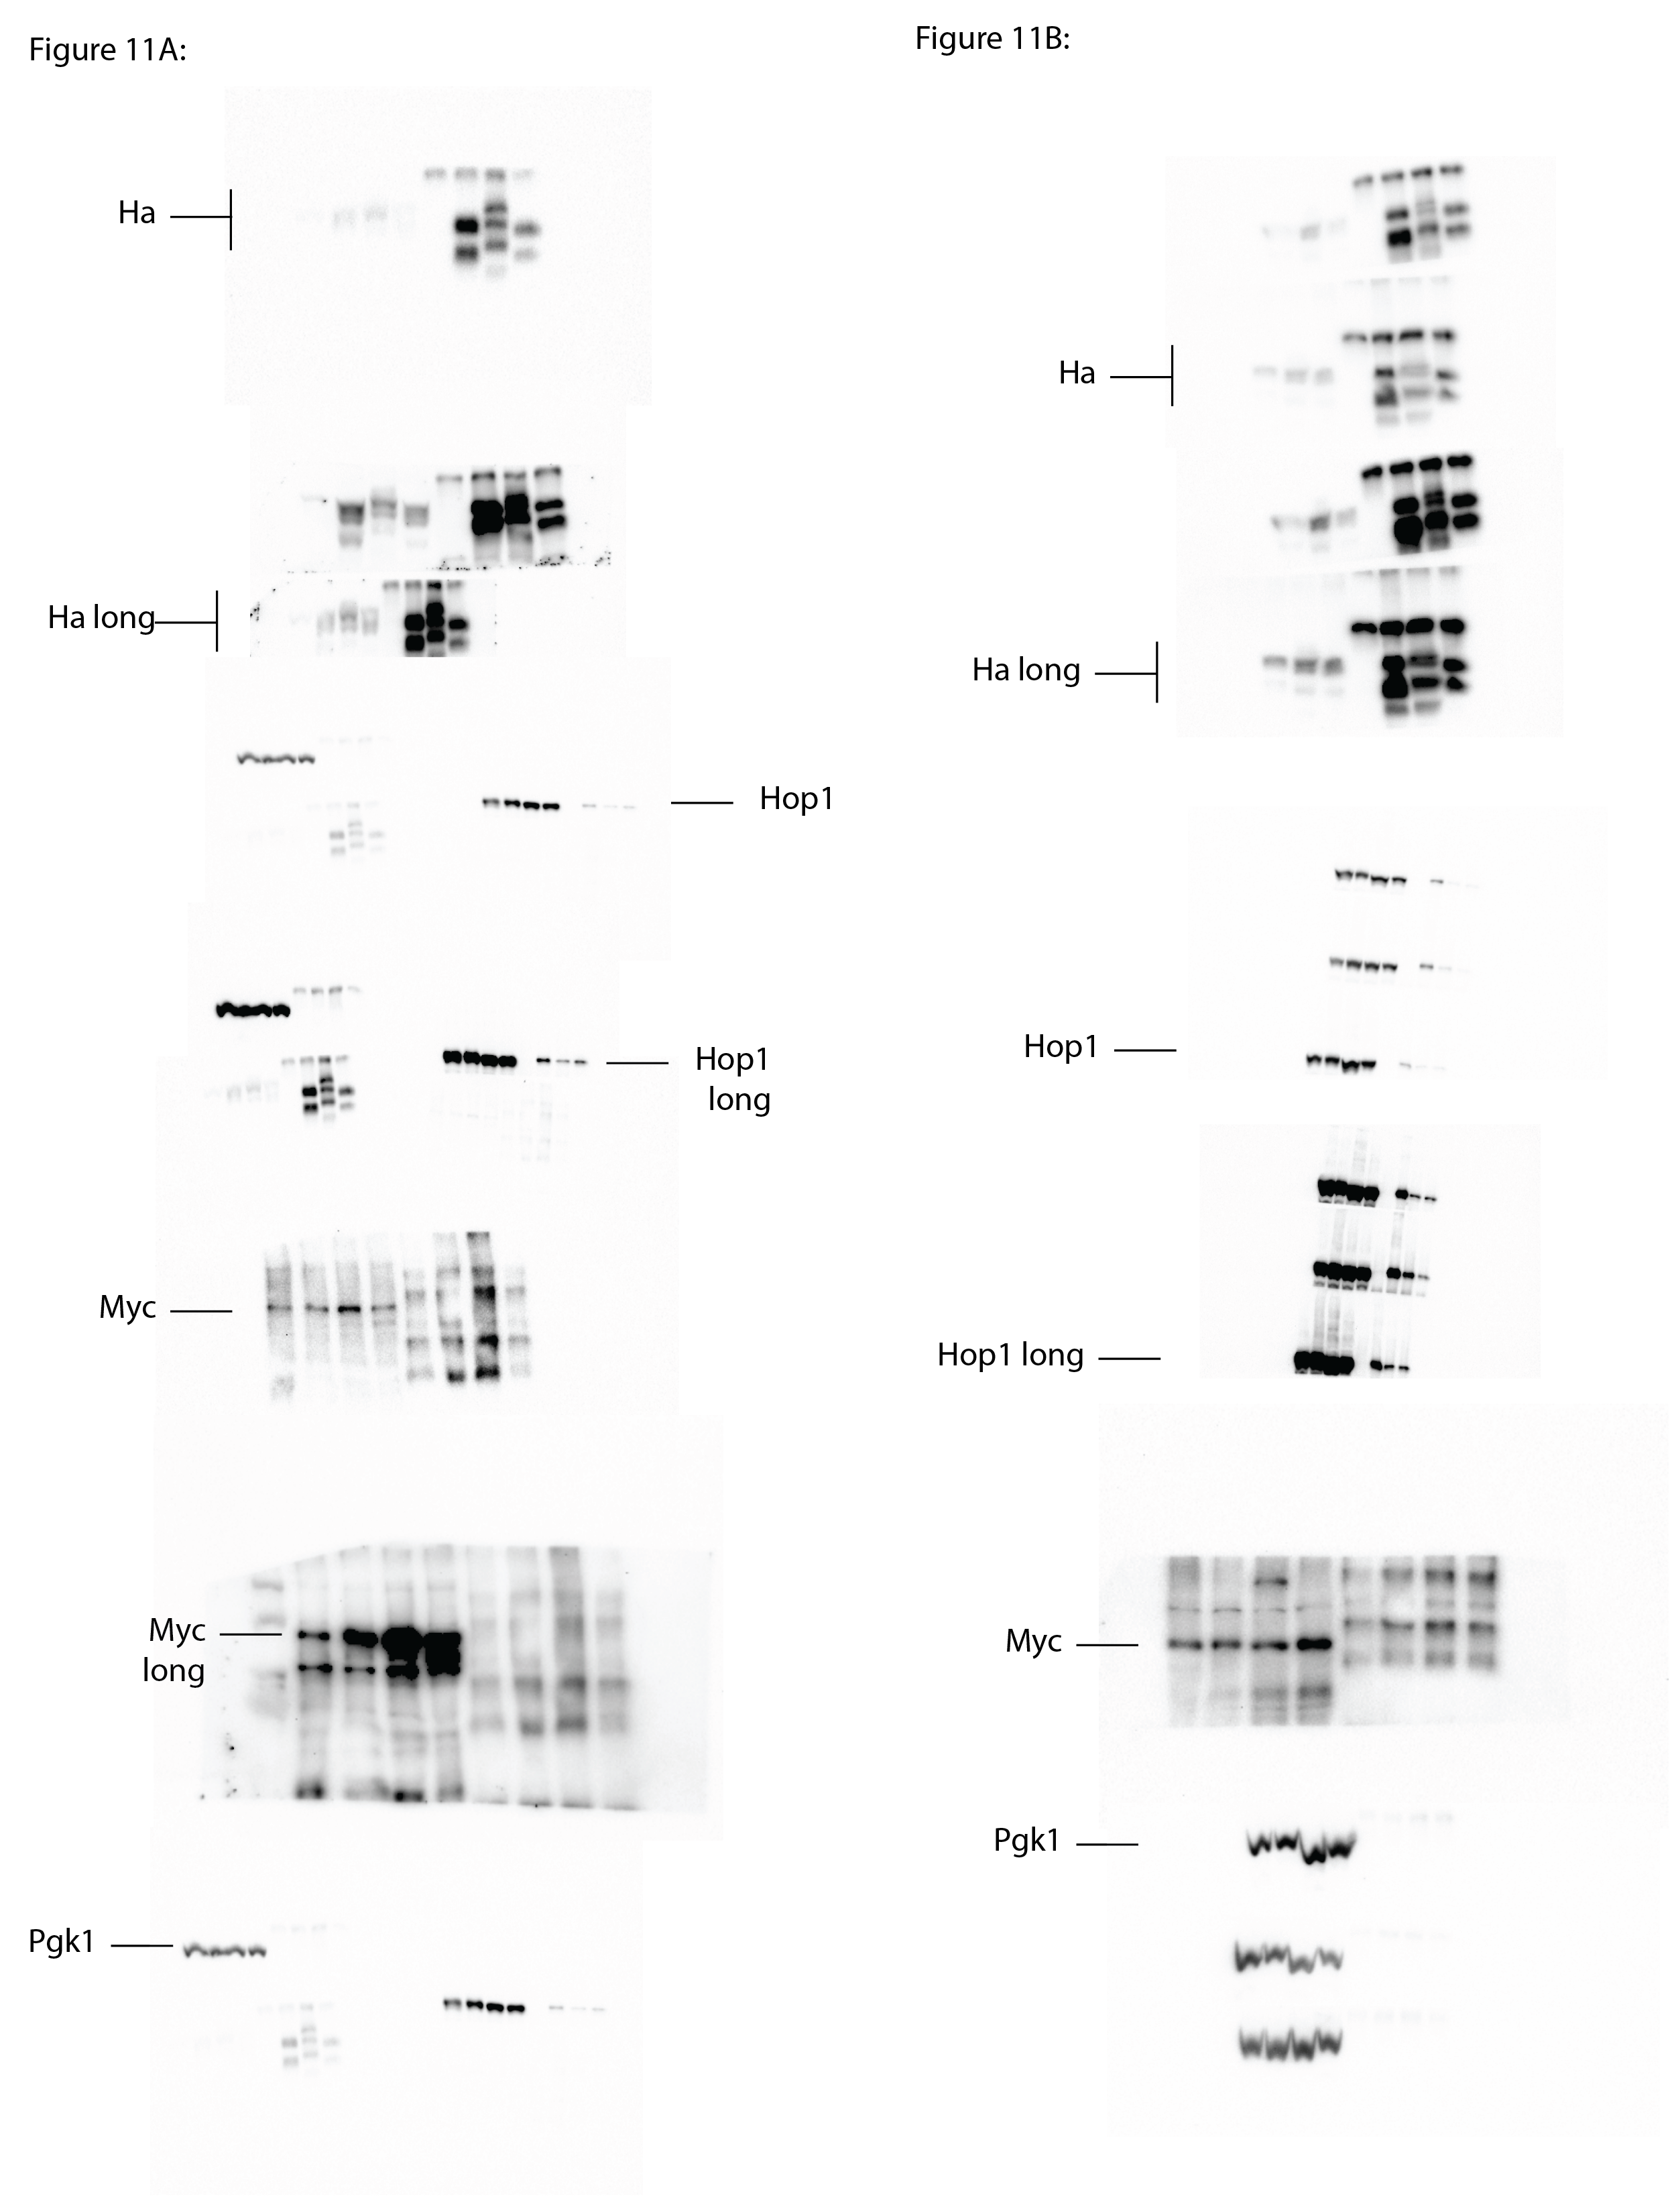

Supplement: fig5-data1 [file Rousova et al paper unedited figure blots.docx]

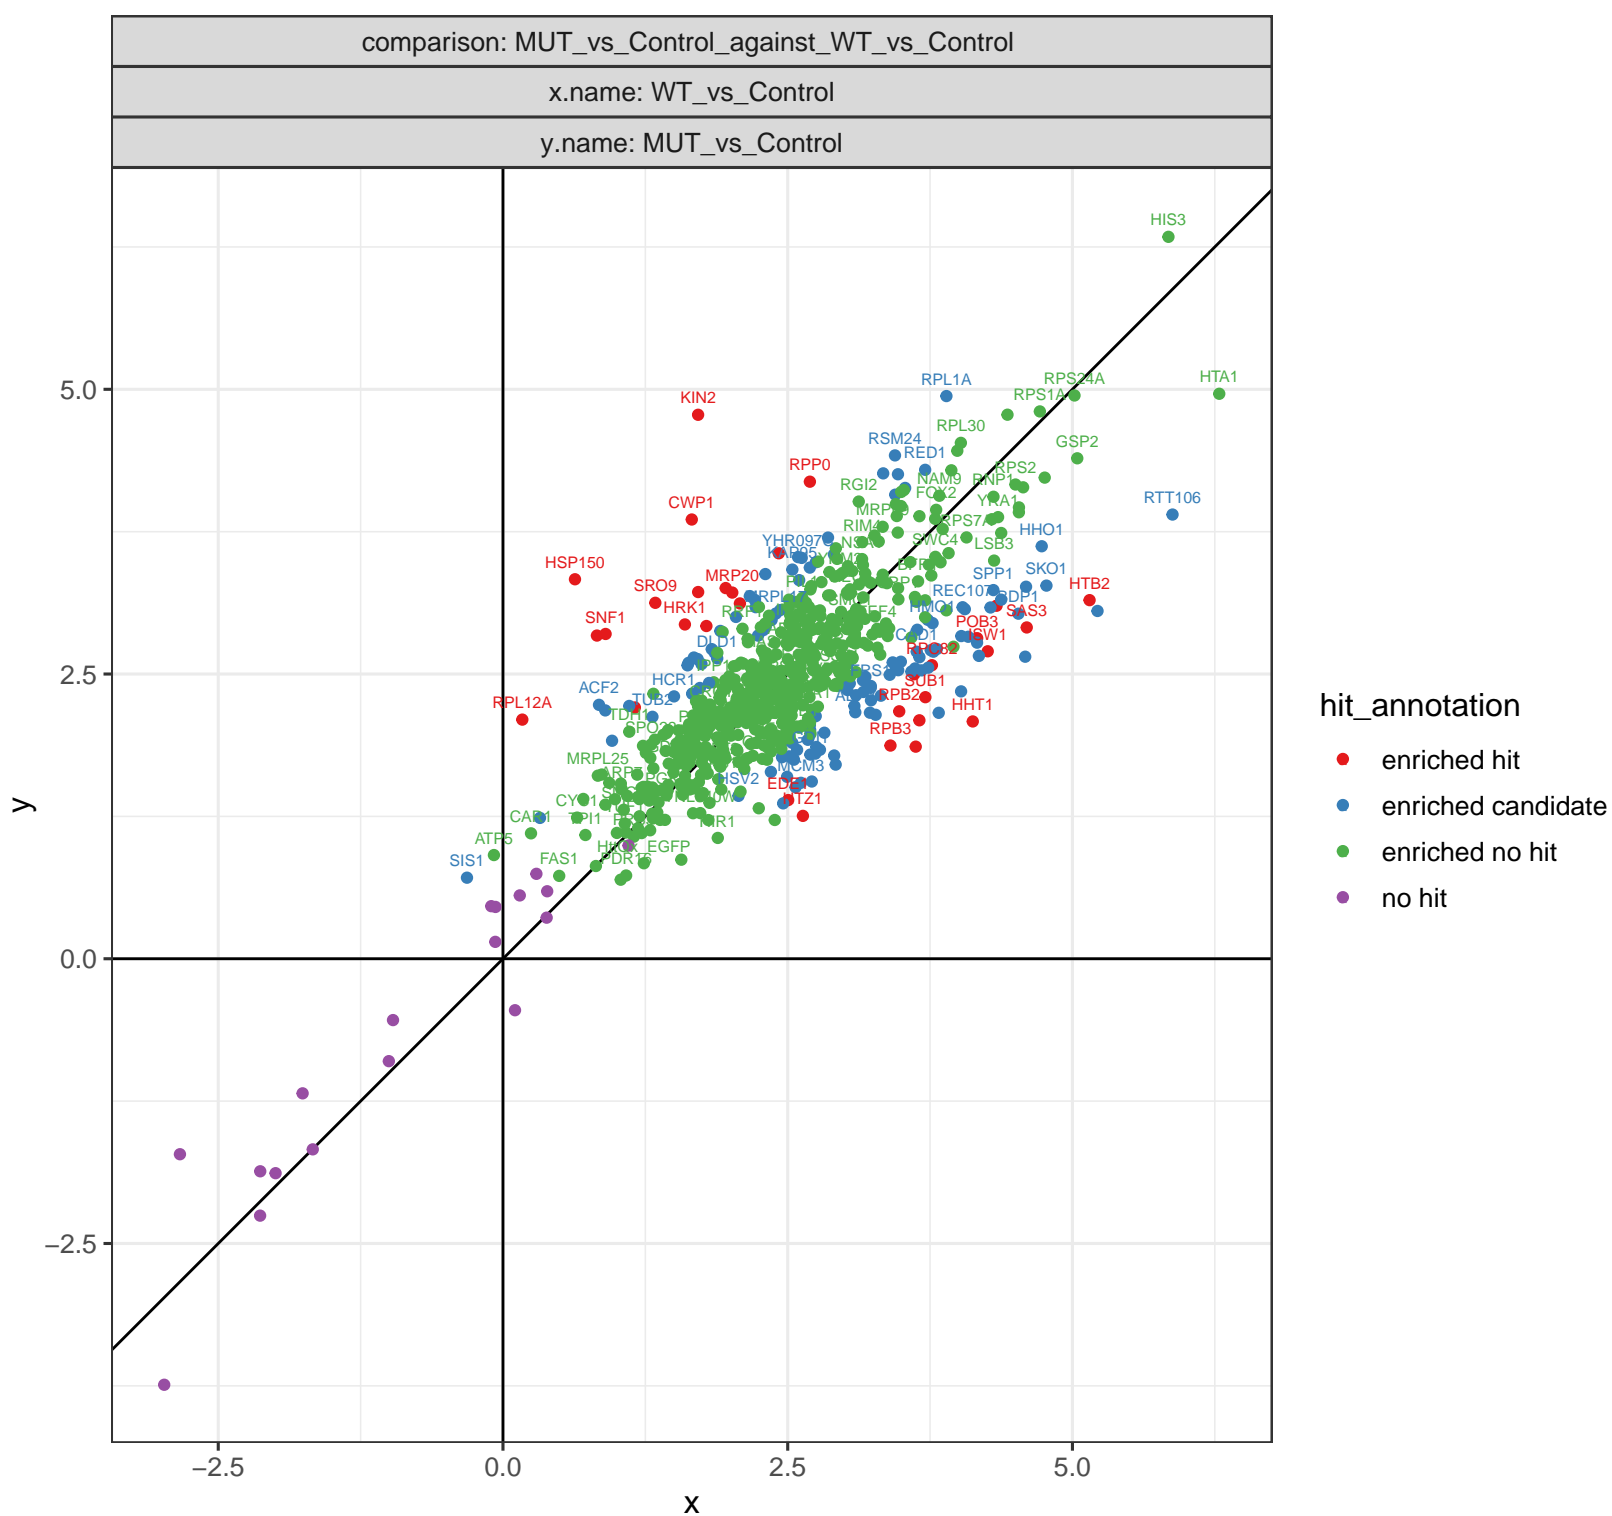

Supplement: data2 [file elife-72330-data2-v2.zip]

# kmeans clustering

gene

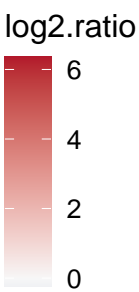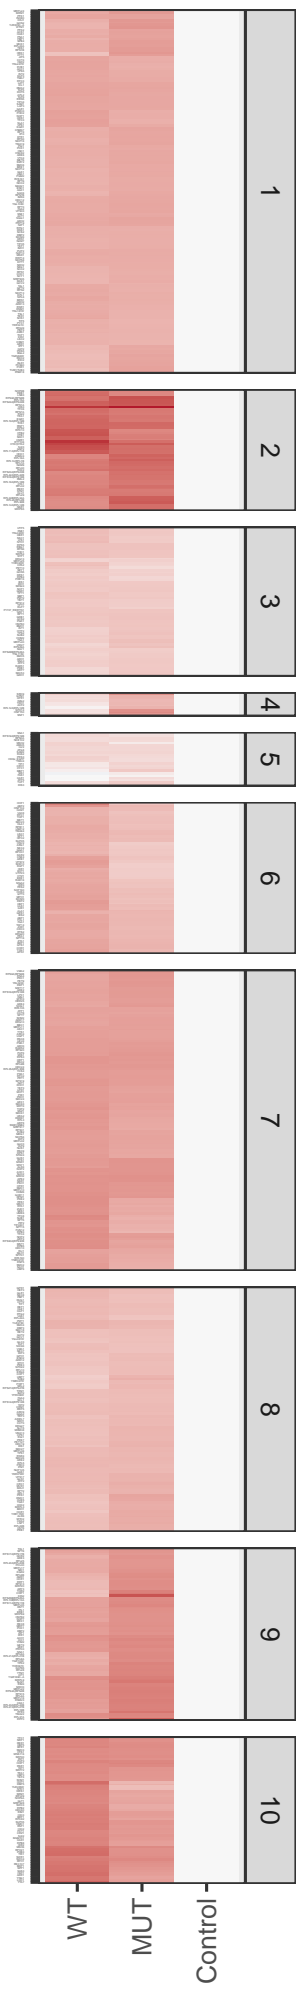

Supplement: data2 [file elife-72330-data2-v2.zip]

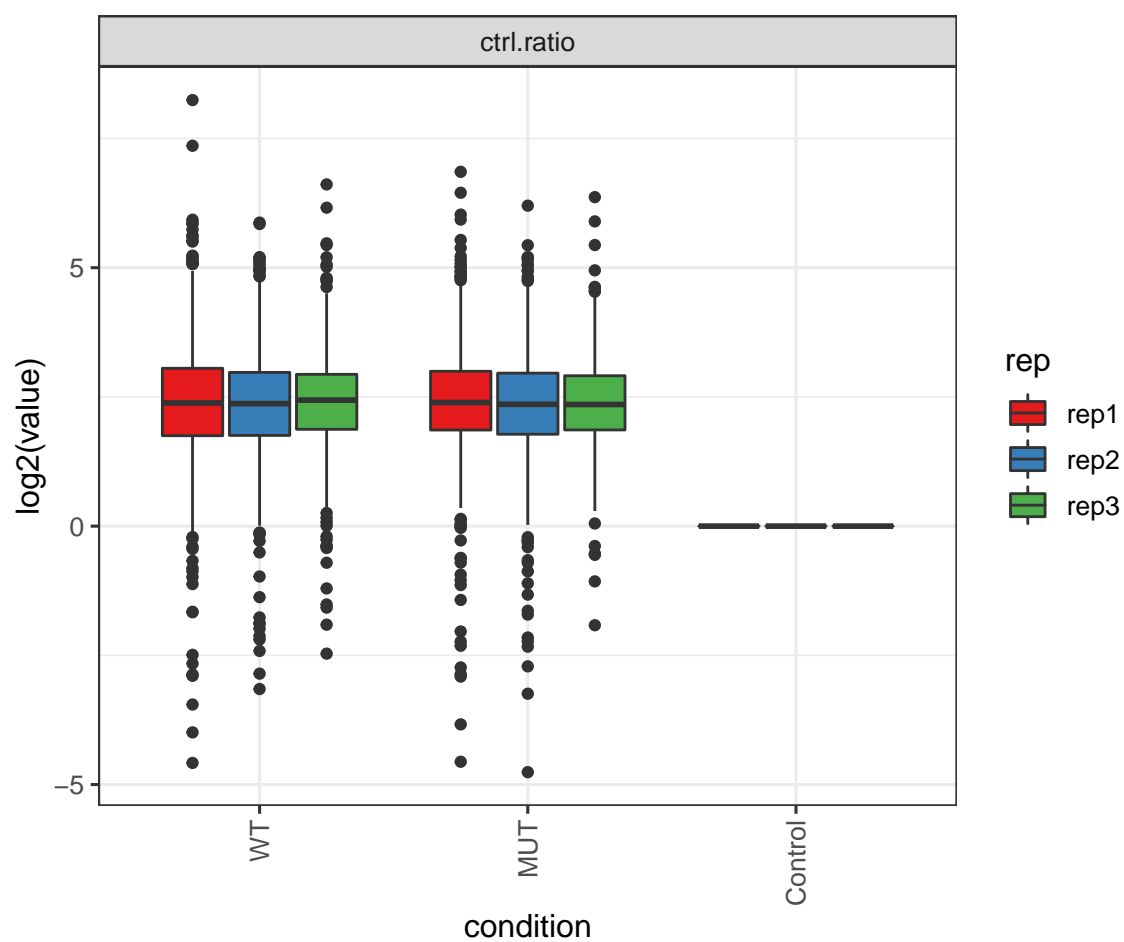

Supplement: data2 [file elife-72330-data2-v2.zip]

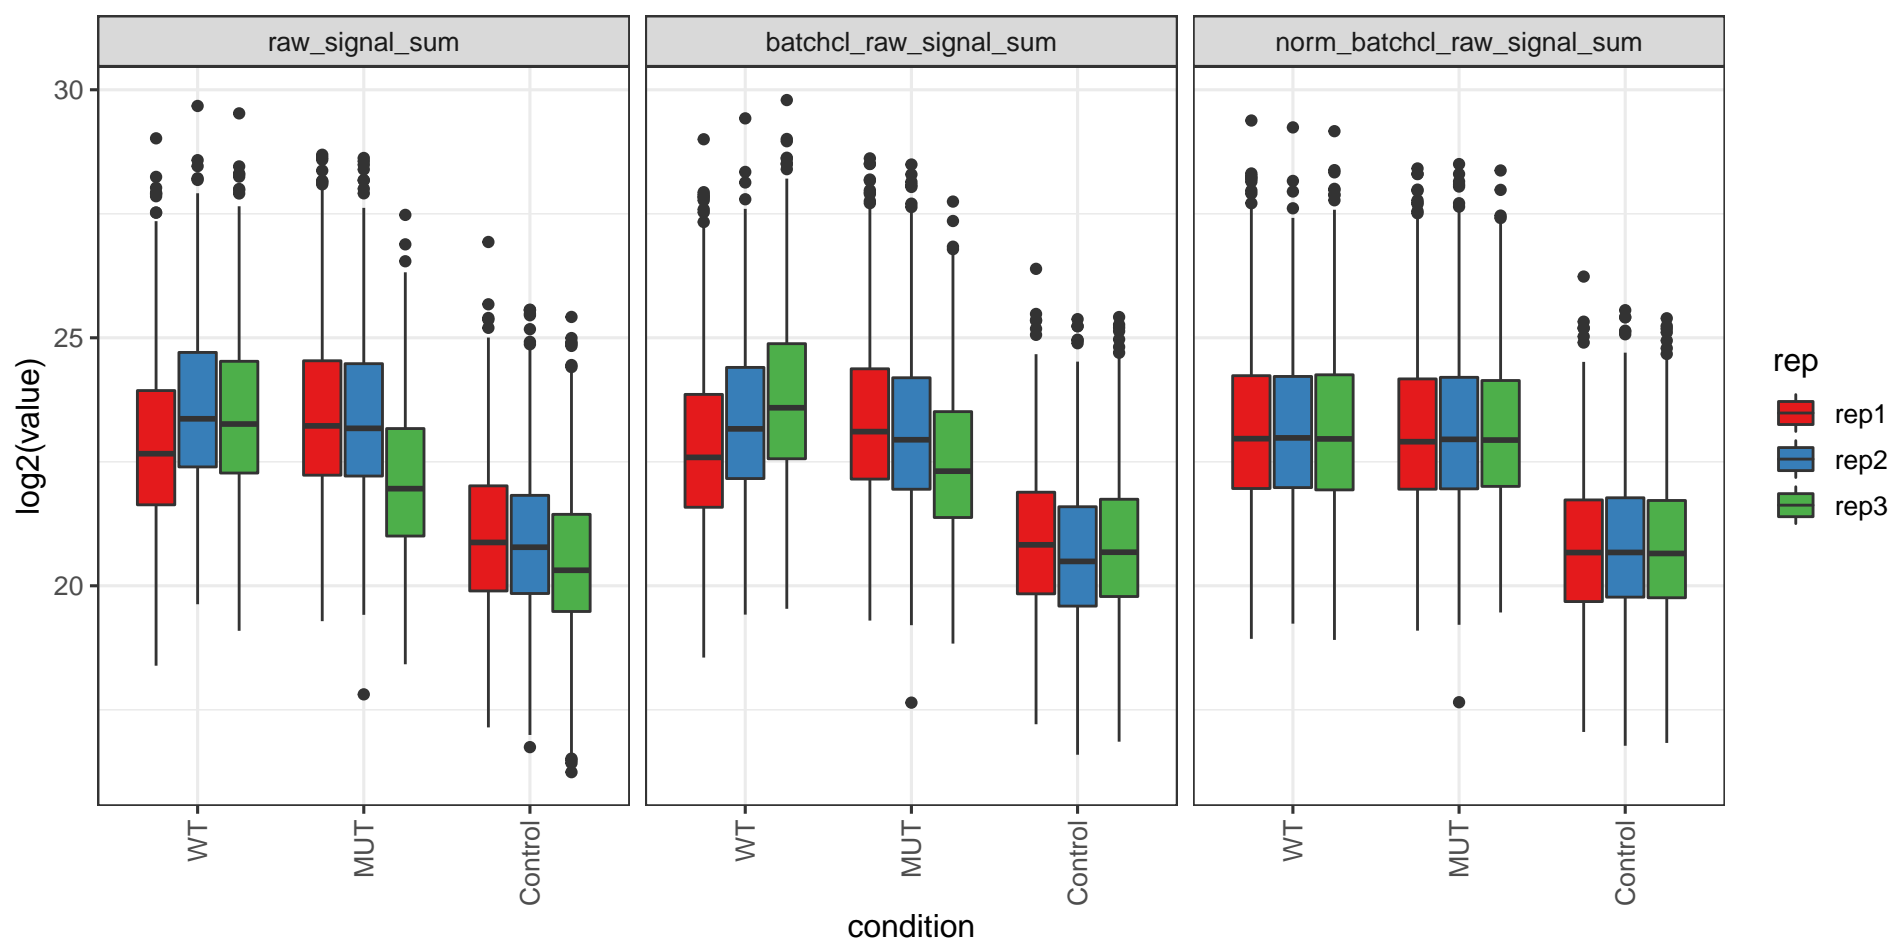

Supplement: data2 [file elife-72330-data2-v2.zip]

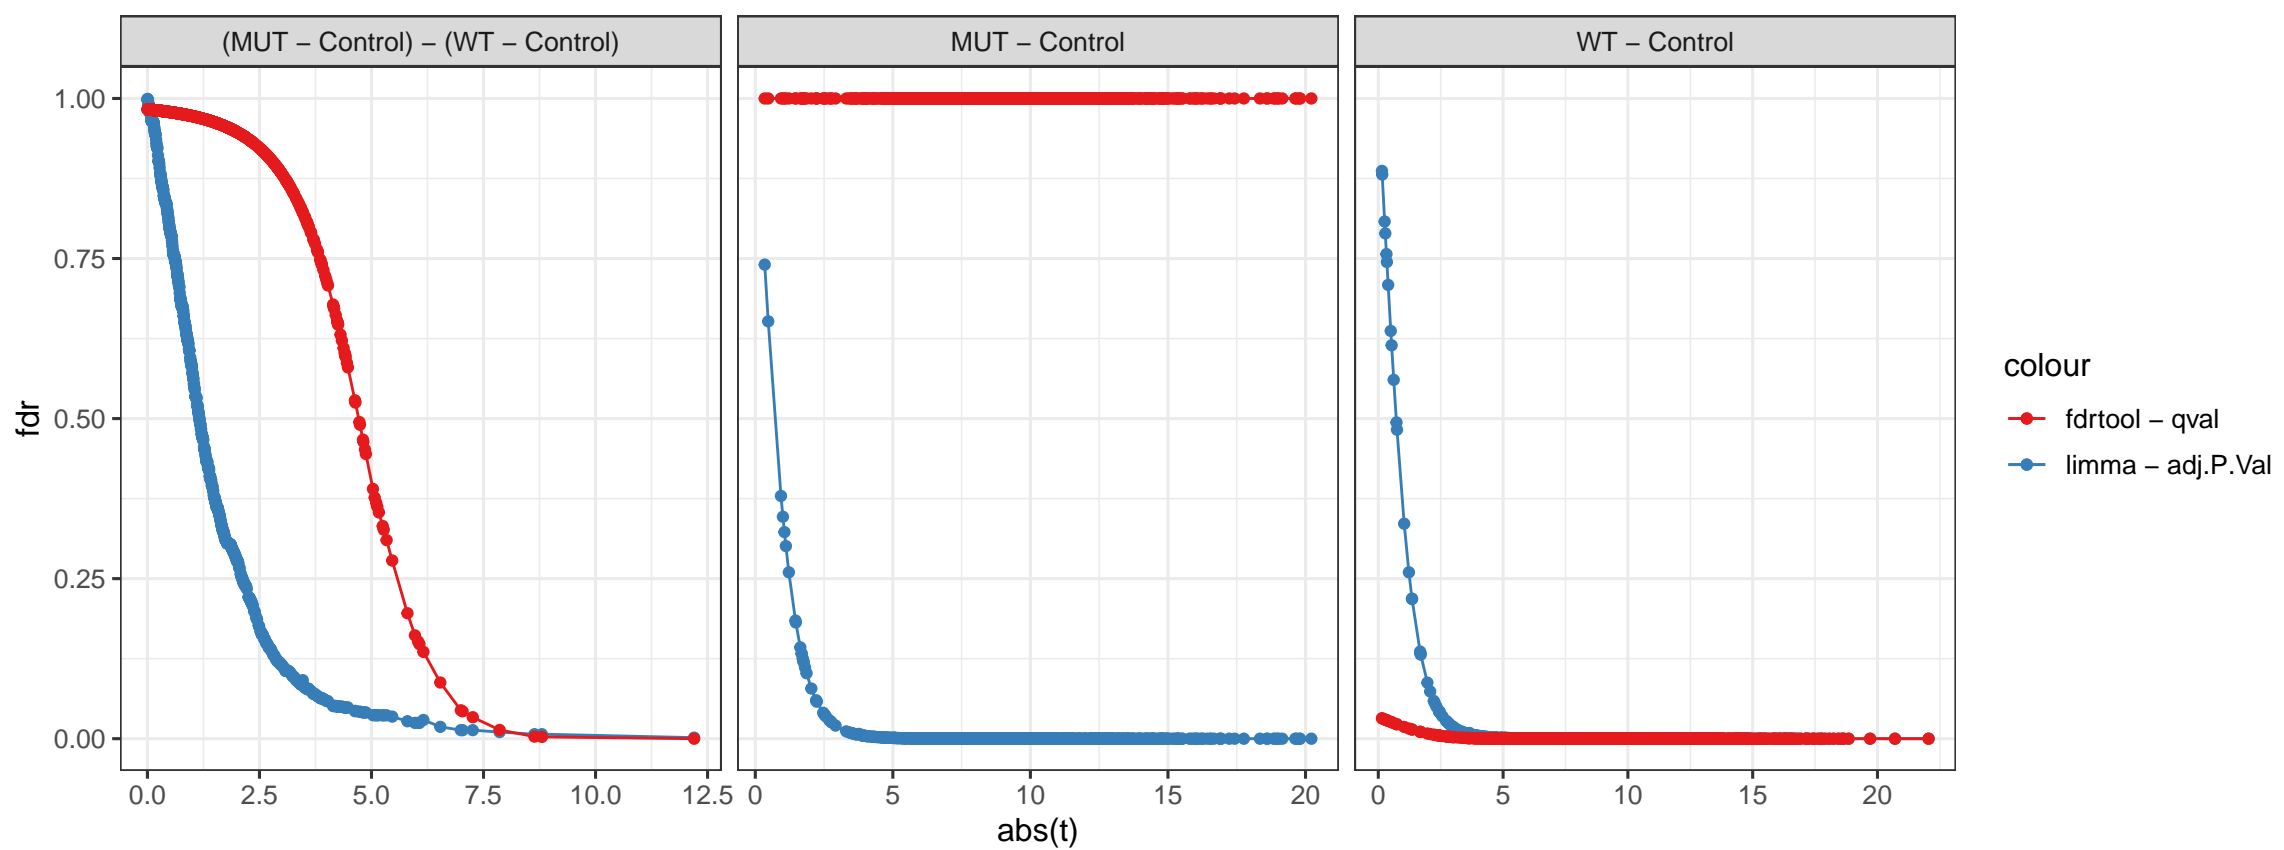

Supplement: data2 [file elife-72330-data2-v2.zip]

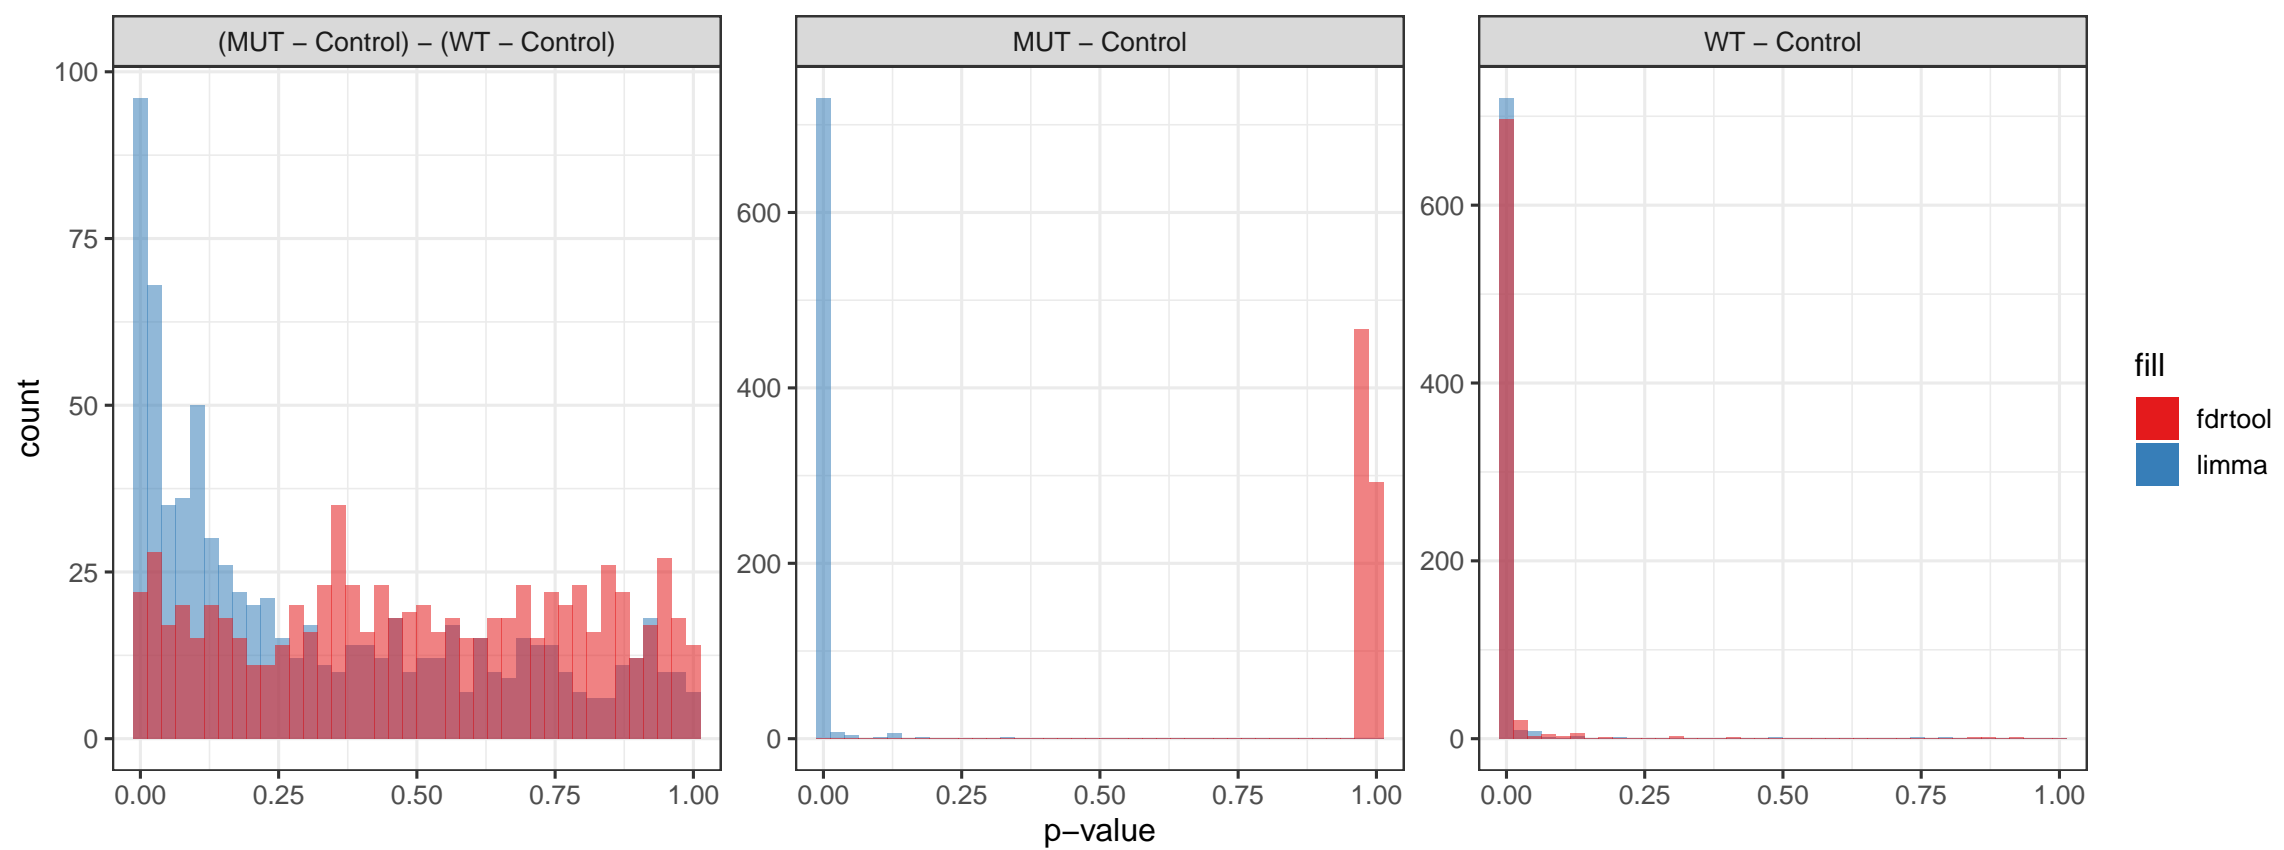

Supplement: data2 [file elife-72330-data2-v2.zip]

kmeans clustering

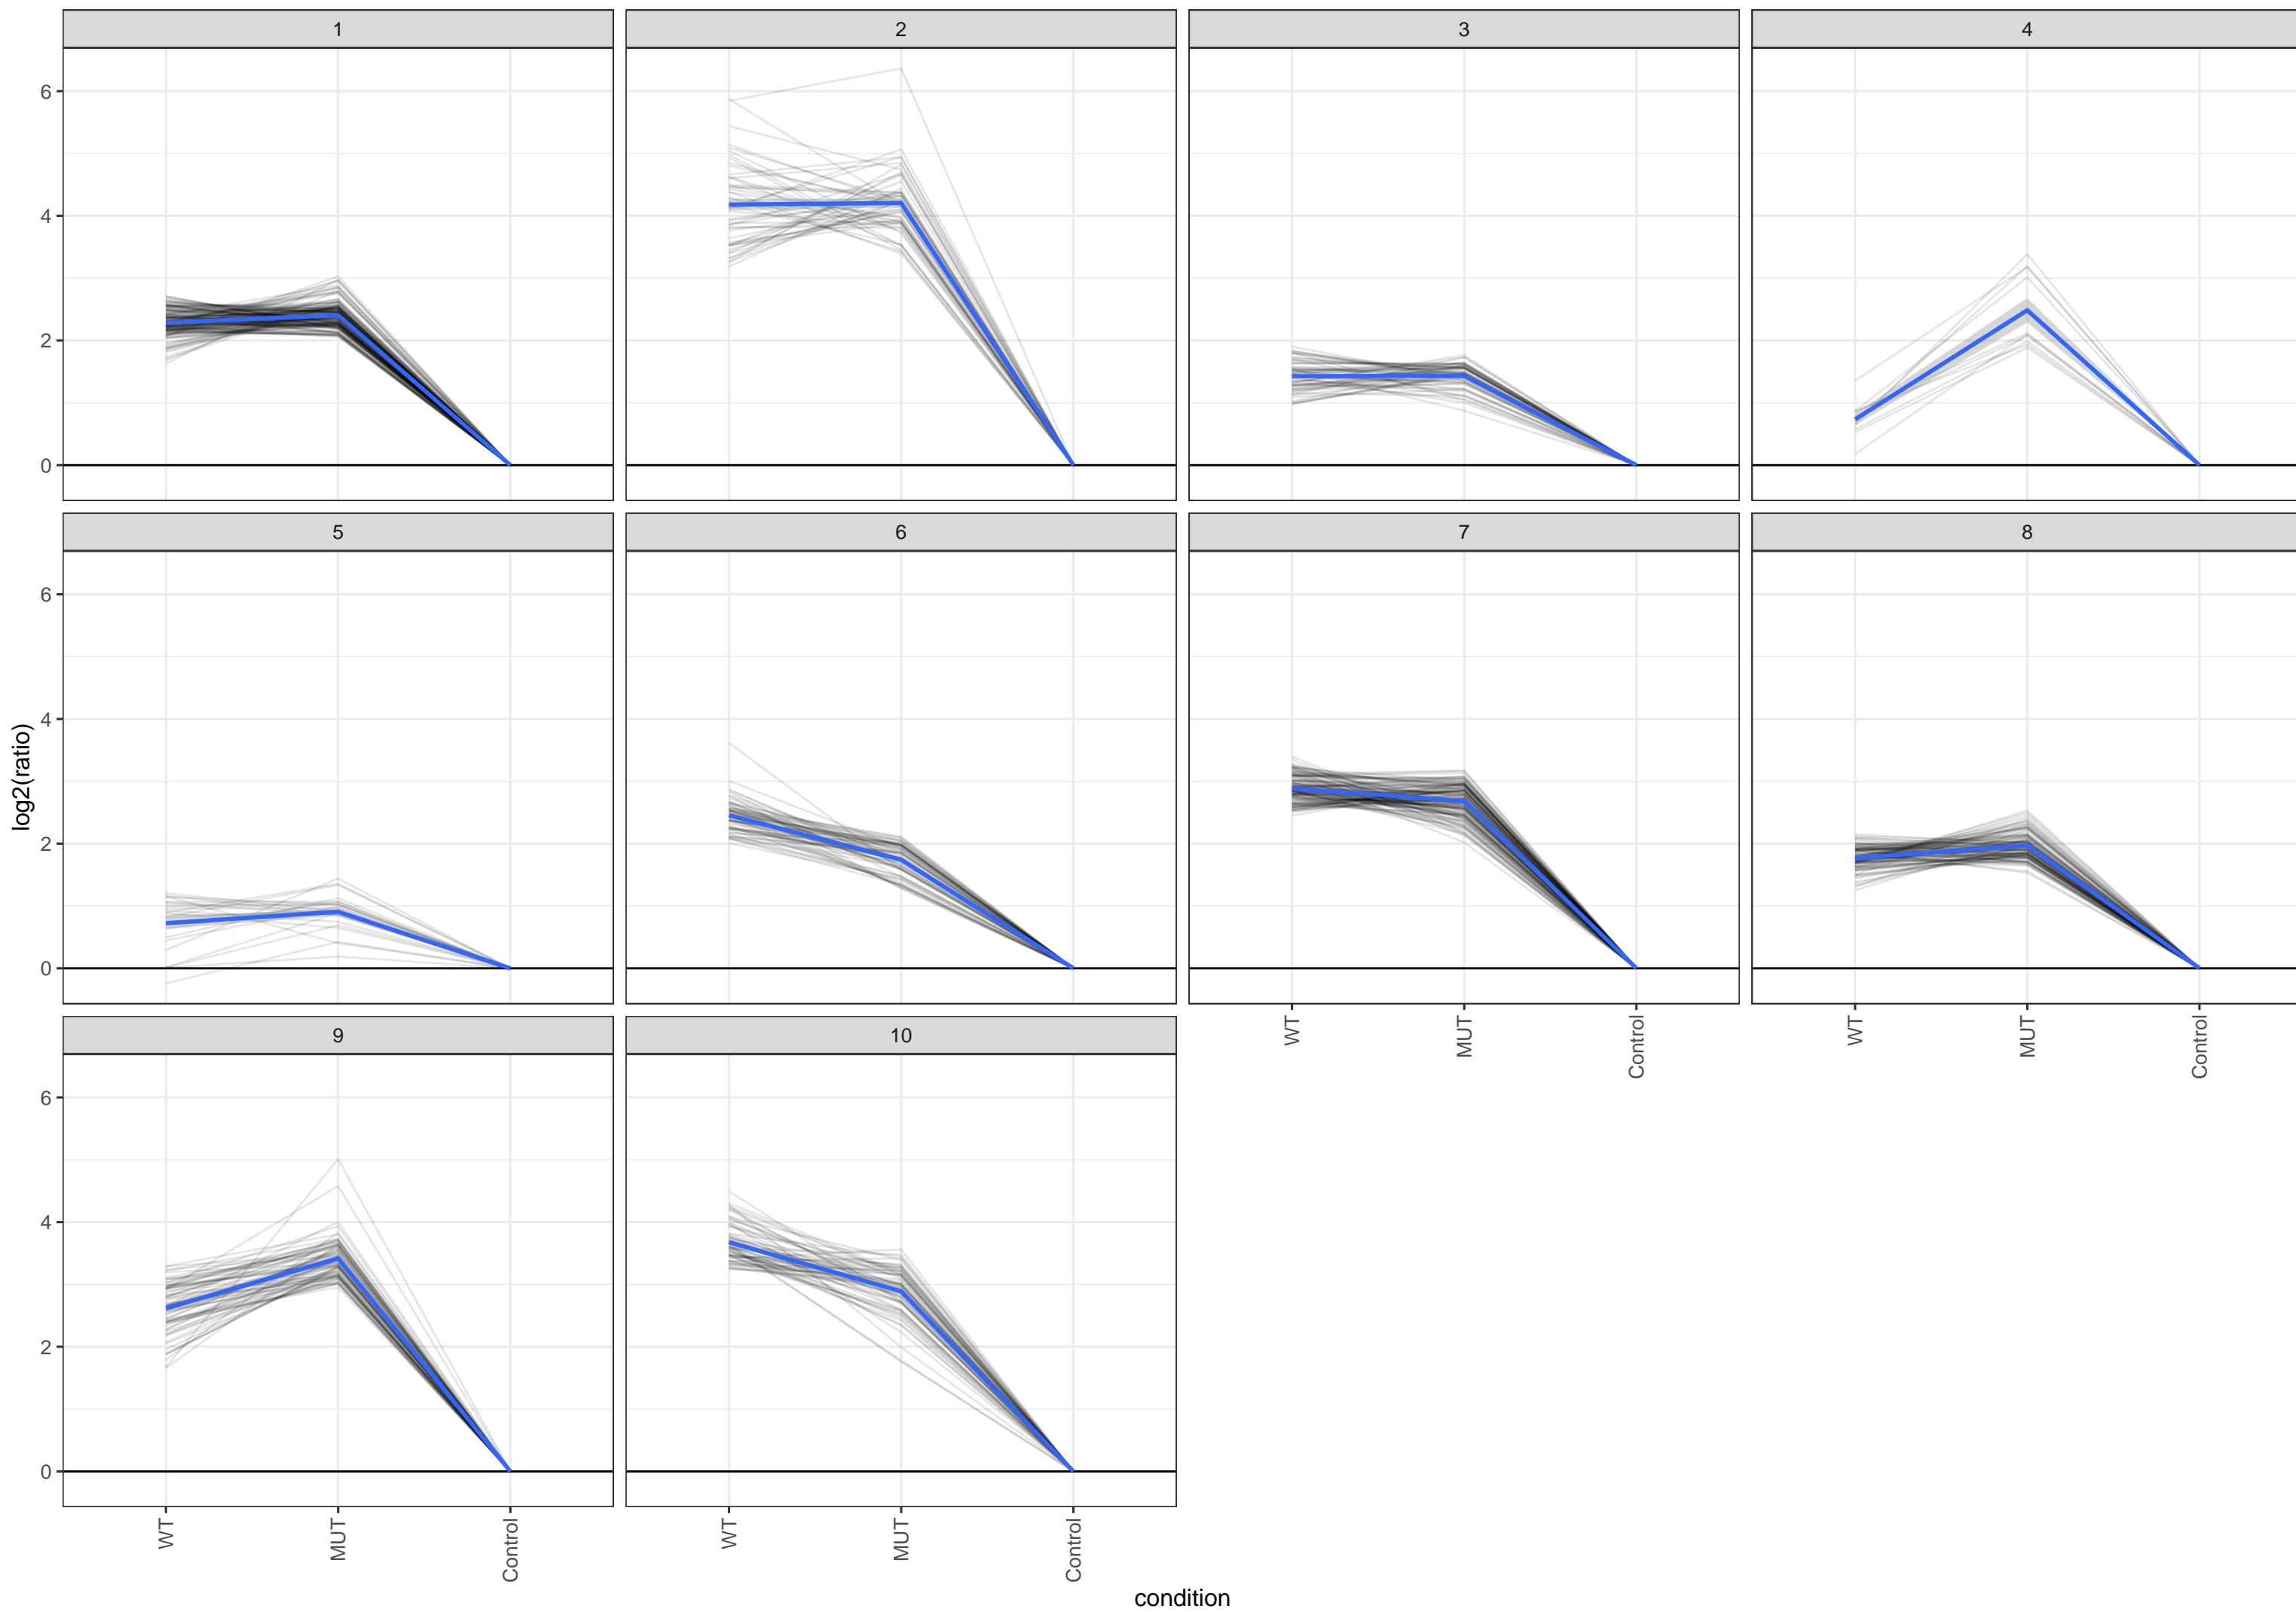

Supplement: data2 [file elife-72330-data2-v2.zip]

# hierarchical clustering

gene

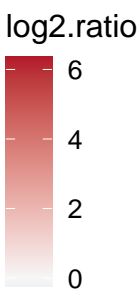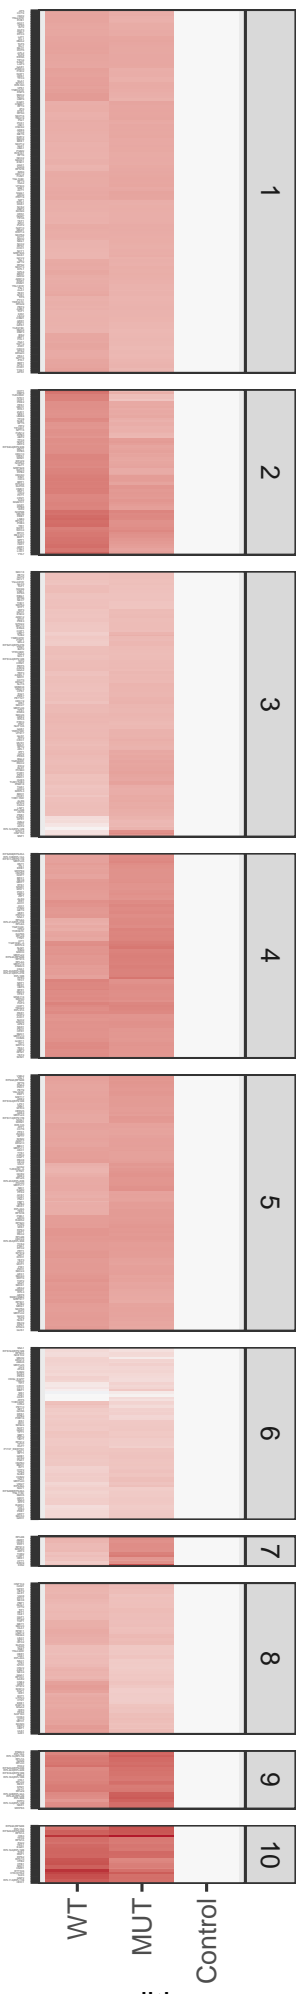

Supplement: data2 [file elife-72330-data2-v2.zip]

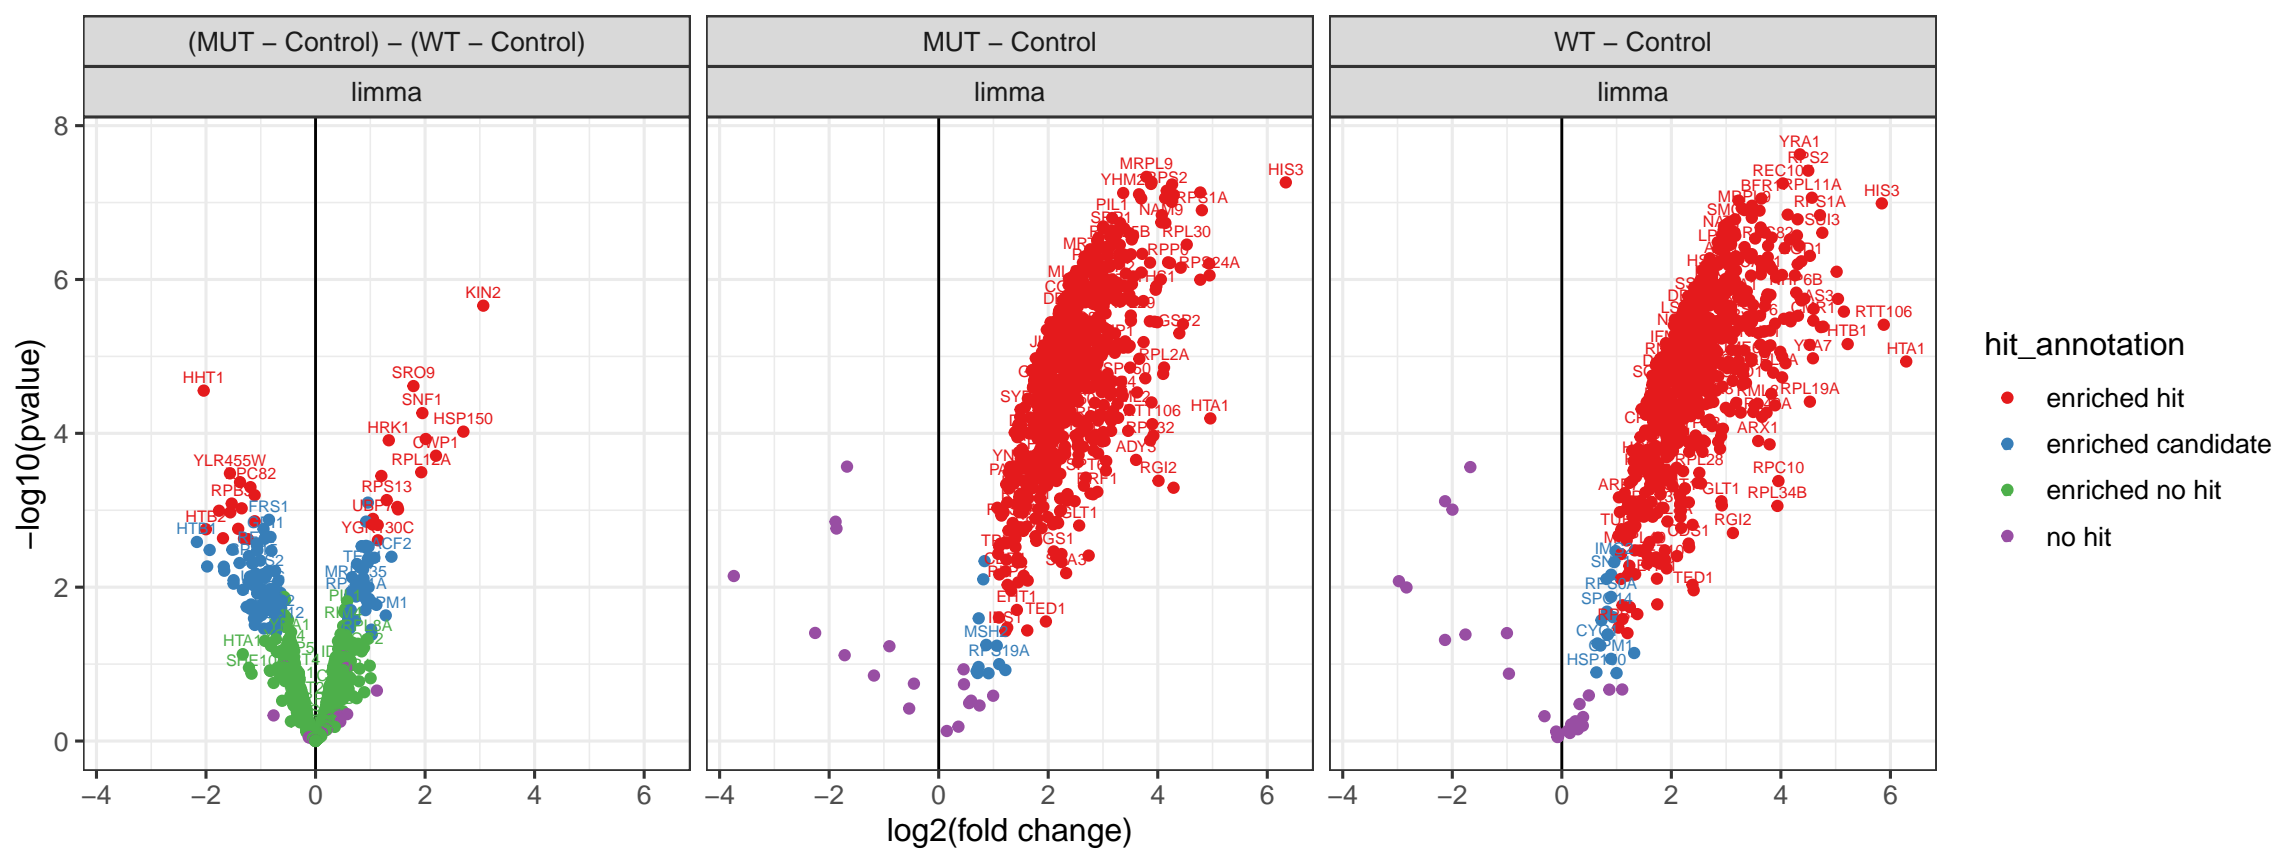

Supplement: data2 [file elife-72330-data2-v2.zip]
